# Supplementary material
Source: PubMed Central journal article supplement (PMC6521697)
Supplement: NIHMS1013385-supplement-Supplemental_data.pdf [file NIHMS1013385-supplement-Supplemental_data.pdf]

## Supporting Information

**Title:** A Chemogenomic Screening Platform Used to identify Chemotypes Perturbing HSP90 Pathways

**Authors:** Fiona M Thomas<sup>1</sup>, Kourtney M Goode<sup>1</sup>, Bartek Rajwa<sup>2</sup>, Andrew B. Bieberich<sup>1</sup>, Larisa V. Avramova<sup>2</sup>, Tony R. Hazbun<sup>1</sup>, V. Jo Davisson<sup>1\*</sup>

### Supporting information contents

**Figure S1:** Comparison of the top 20 sensitive strains to several Hsp90 inhibitors from four publications.

**Figure S2:** Sensitivity of yeast deletion strains to geldanamycin (GA), radicicol (RAD) and novobiocin (Nov).

**Figure S3. A)** Summary of calculations performed to determine % change, Sum Index, Diversity Index and V-values; **B)** A schematic of the filtering process as applied to primary screening data for two chemical libraries that lead to the defining of the Class I hits.

**Figure S4. A)** Examples of averaged raw data curves for Class I hit compounds screened at 20  $\mu\text{M}$ ; **B)** Normalized turbidity curves of deletion mutants demonstrating sensitivity of the *ydj1* $\Delta$  strain to 20  $\mu\text{M}$  Macbecin.

**Figure S5.** Source and process for 360 strains screen to identify heat shock associated strains as indicators for follow up profiles.

**Figure S6.** Venn diagram demonstrating overlap between Heat shock associates strains (HAS) and previous screening efforts

**Figure S7.** Normalized growth curves of *ras21* strain treated with 1% DMSO and 100  $\mu\text{M}$  NSC145366.

**Figure S8:** Negative control data for DARTs experiments with recombinant Hsp90 $\beta$ .

**Figure S9.** Competition assay using Hsp90 inhibitors Geldanamycin (GA), AUY922 and NSC145366 to displace FITC-GA binding to Hsp90 $\beta$ .

**Detailed method description of distance measurements and chemical library data analysis along with additional references.**

**Figure S1: Comparison of the top 20 sensitive strains to several Hsp90 inhibitors from four publications. A.**

Comparison of geldanamycin (GA) from three separate studies shows that no deletion strains were observed in common and only 3 strains were shared between two studies.

**B.** Additional comparison of the GA studies with radicicol (RAD). An overlap of 8 strains was observed by the Parsons 2006 study for GA and RAD. However, overlap with other studies was non-existent. **C.** Comparison of GA studies with macbecin sensitivity (McClellan et al. 2007). Only five strains exhibiting macbecin sensitivity overlapped with the other three GA studies.

References as cited in article:

6. Parsons AB, et al.: Exploring the mode-of-action of bioactive compounds by chemical-genetic profiling in yeast. *Cell* 2006; 126:611-625.

16. McClellan AJ, et al.: Diverse cellular functions of the Hsp90 molecular chaperone uncovered using systems approaches. *Cell* 2007; 131:121-135.

21. Lee AY, et al.: Mapping the cellular response to small molecules using chemogenomic fitness signatures. *Science* 2014; 344:208-211.

22. Zhao R, et al: Navigating the chaperone network: an integrative map of physical and genetic interactions mediated by the hsp90 chaperone. *Cell* 2005; 120:715-727.

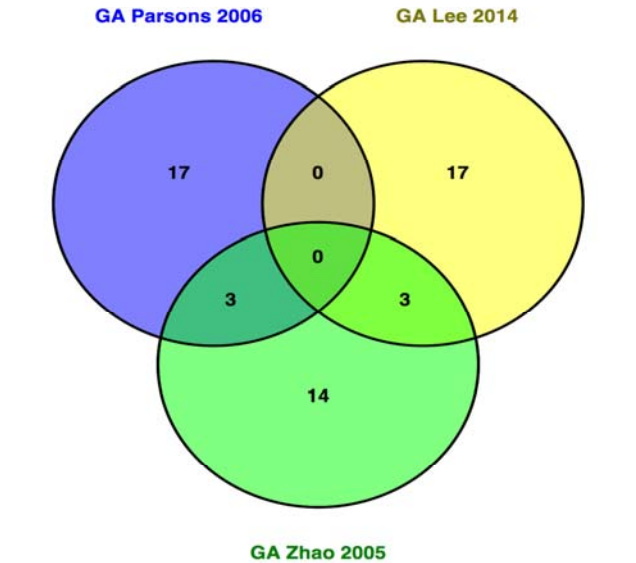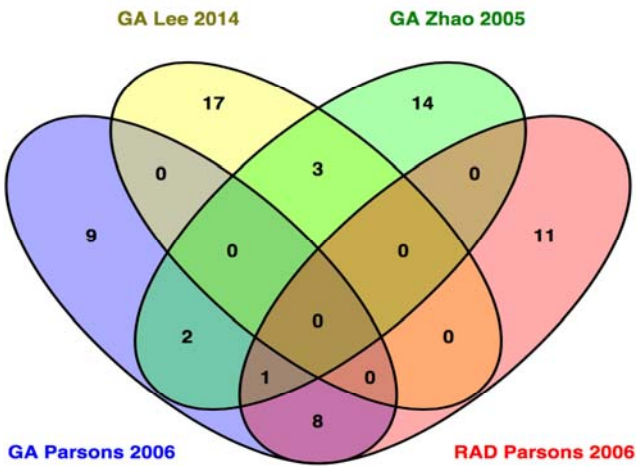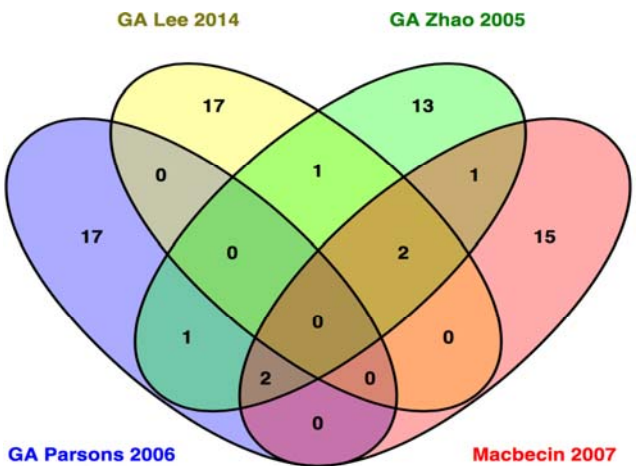

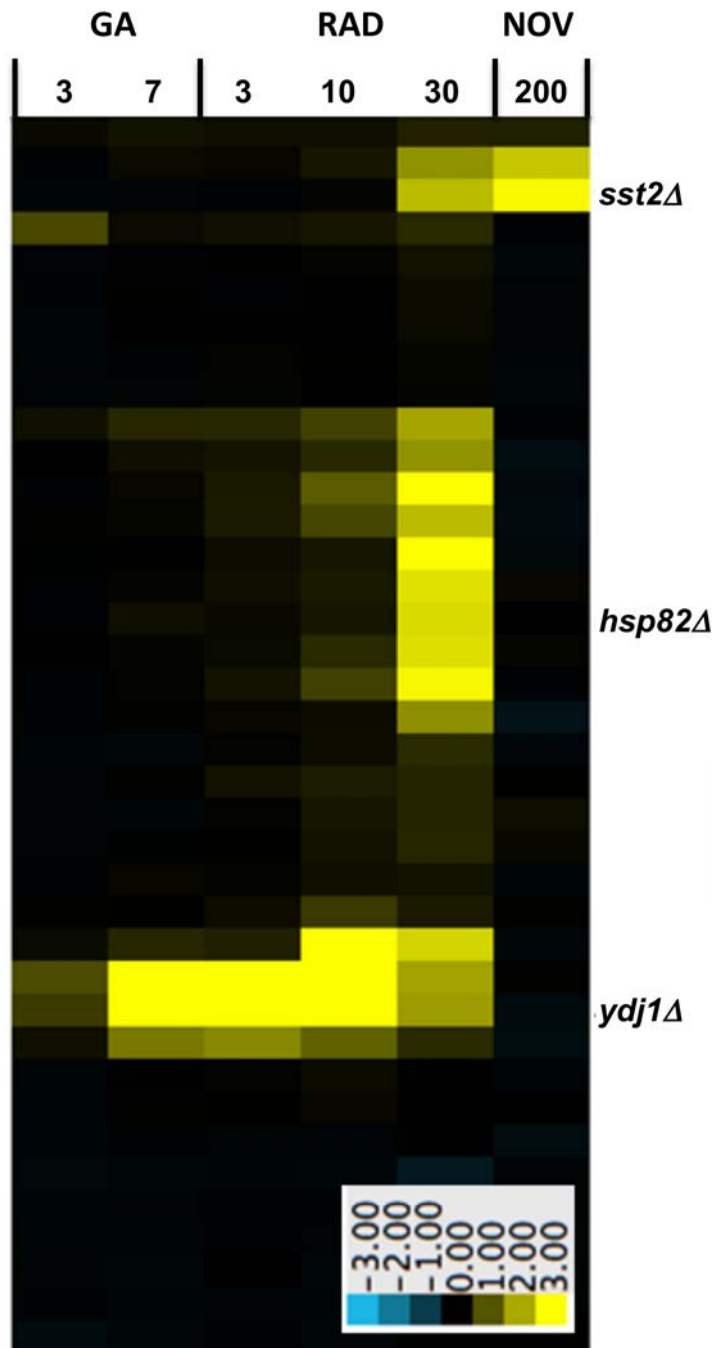

**Figure S2: Sensitivity of yeast deletion strains to geldanamycin (GA), radicicol (RAD) and novobiocin (Nov).** Growth rates of strains at several concentrations ( $\mu\text{M}$ ) displayed on the x-axis were measured and a growth ratio relative to wild-type strain was determined followed by clustering using the centroid linkage algorithm. Yellow indicates increased sensitivity and blue indicates resistance relative to the wild-type strain at each condition – nearly all strains behaved similarly to wild-type or were more sensitive. The three deletion strains selected for further screening are labeled. Identities of all strains, time to reach  $\text{OD}_{600}=0.8$  and raw data curves are present in an excel file named Table S1.

| Term | Definition |
|------|------------|
|------|------------|

% change 
$$\left[ \frac{\text{Distance between mean drug curve and mean control curve}}{\text{Distance between mean control curve and a no growth curve}} \right] * 100$$

Sum Index Sum of % change of all four strains under a particular drug treatment  
 Sum Index = %Hsp40 + %Hsp82 + %Sst2 + %WT

Diversity Index Largest pairwise difference calculated between % change of all four strains under a particular treatment i.e. the largest difference between  
 |%Hsp40-%Hsp82|; |%Hsp40-%Sst2|; |%Hsp40-%WT|; |%Hsp82-%Sst2| etc

v-value 
$$\frac{[\text{Distance between mean drug curve and mean control curve}]}{\div [\text{distance measured at 95th percentile (critical value)}]}$$

### Pipeline for Chemical Library Screen

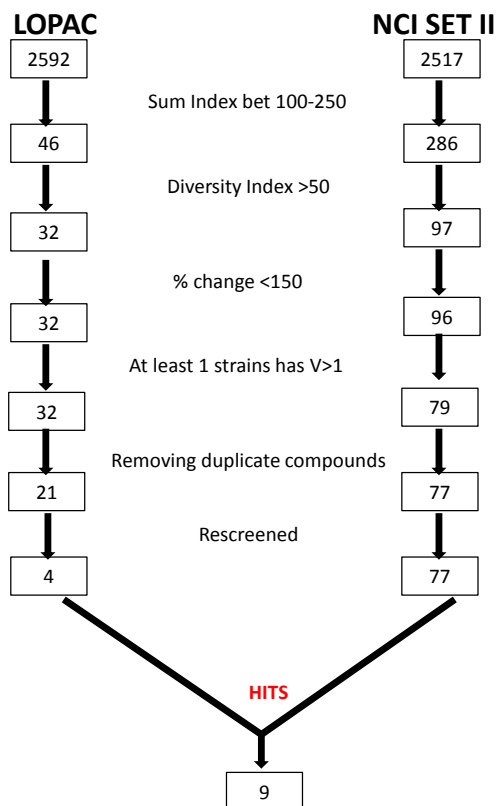

**% change**  

$$\left( \frac{\text{dist. between mean drug-mean control}}{\text{mean dist. between controls}} \right) * 100$$

**Div Index is the largest pair wise % change calcn.**  
 |%Hsp40-%Hsp82|; |%Hsp40-%Sst2|;  
 |%Hsp40-%WT|; |%Hsp82-%Sst2| etc

**Sum Index is the total % change**  
 %Hsp40 + %Hsp82 + %Sst2 + %WT

**Strength of response (V) is a ratio of m/n**  
 m is the dist. between mean drug and mean control  
 n is the dist. at 95<sup>th</sup> percentile for all dist. calc.  
 between drug and control  
 V < 1 (not significant); V > 1 (significant)

**Figure S3. A)** Summary of calculations performed to determine % change, Sum Index, Diversity Index and V-values; **B)** A schematic of the filtering process as applied to primary screening data for two chemical libraries that lead to the defining of the Class I hits.

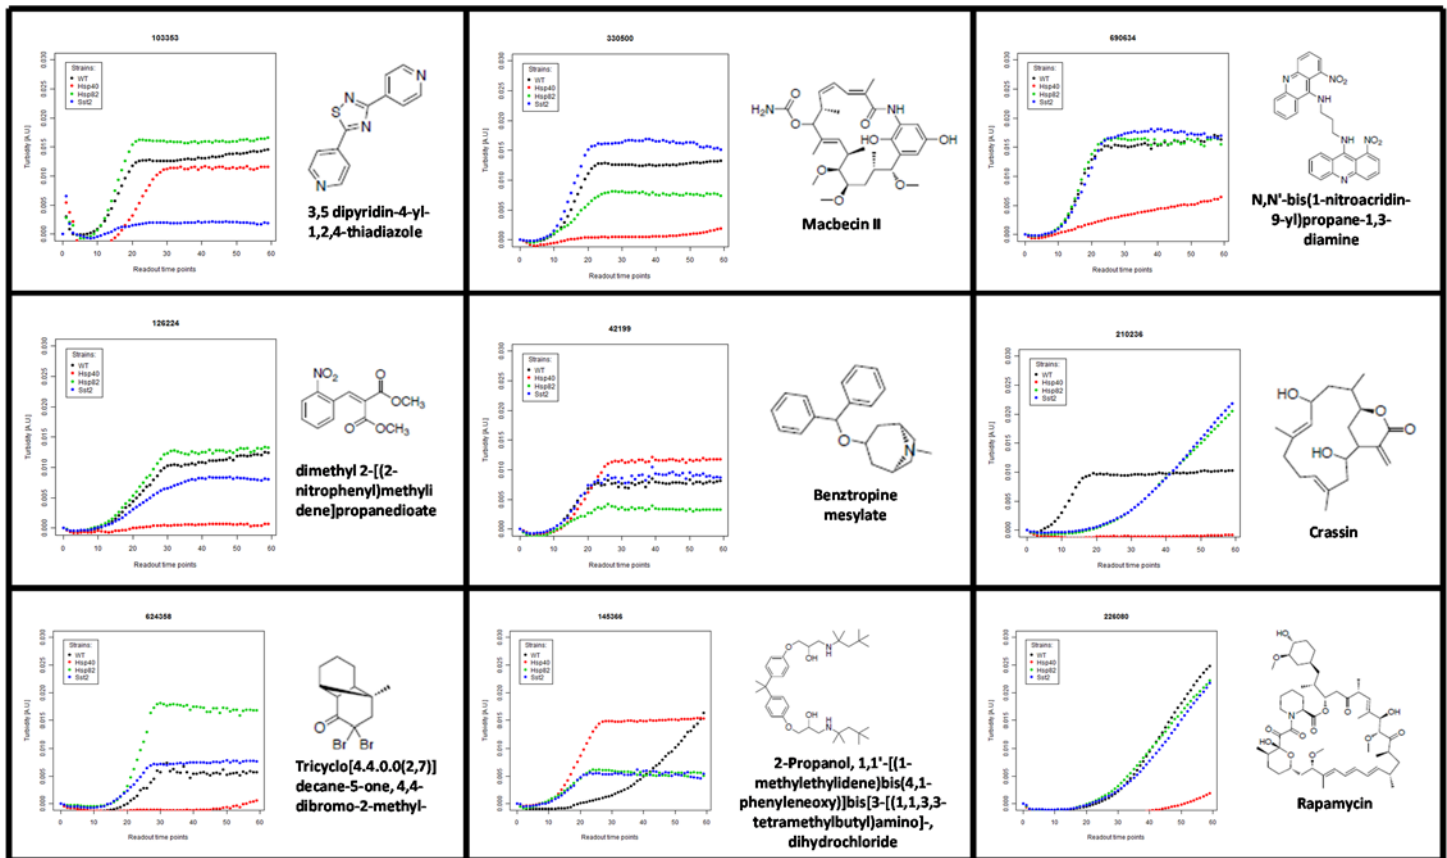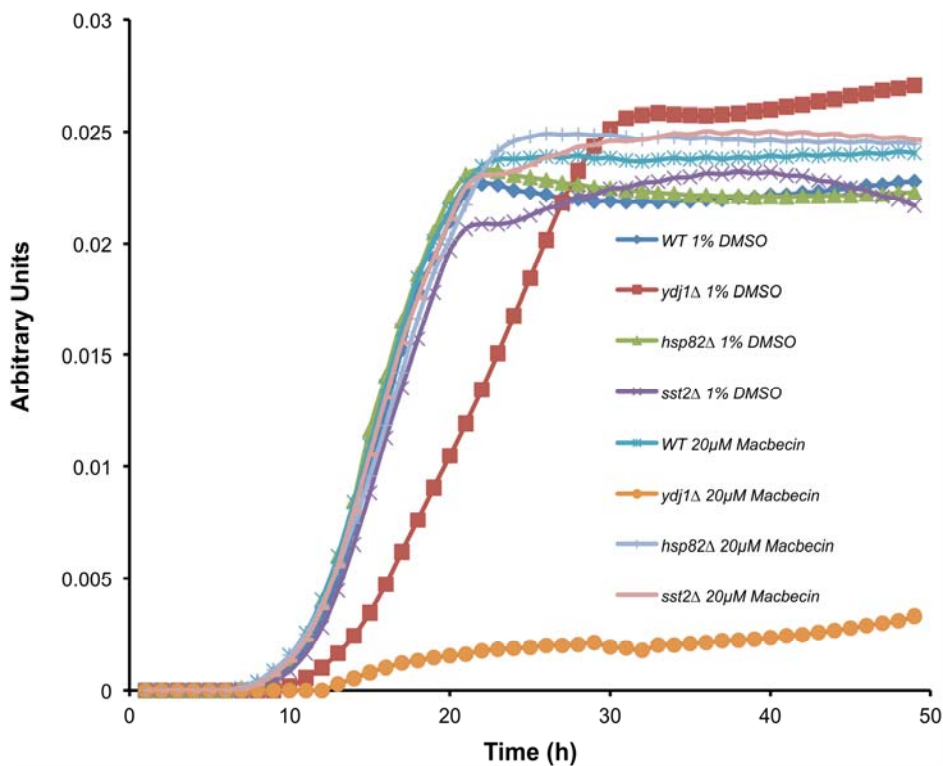

**Figure S4. A)** Examples of averaged raw data curves for Class I hit compounds screened at 20  $\mu$ M; **B)** Normalized turbidity curves of deletion mutants demonstrating sensitivity of the *ydj1* $\Delta$  strain to 20  $\mu$ M Macbecin.

**Strain List**      **Inclusion Criteria**

**Zhao and Gong - 75**      Strains corresponding to chaperone genes in Gong et al and the 12 strains in the top 20 GA-sensitive strains in Zhao et al

**Parsons - 150**      Strains in the top 100 sensitive to Radicol or Geldanamycin

**Hsp90 literature - 90**      Strains corresponding with connection to Hsp90 or sensitivity to inhibitors in the literature

**McClellan - 99**      Strains most sensitive to Macbecin at 30C or 37C

**Insensitive Strains - 12**      Randomly selected strains

**HAS - 16**      Final Heat shock associated sensitive strains

\* Essential chaperone genes so heterozygous diploid strains were used

6. Parsons, A. B.; Lopez, A.; Givoni, I. E.; et al. Exploring the mode-of-action of bioactive compounds by chemical-genetic profiling in yeast. *Cell* 2006, 126 (3), 611-25.

14. Zhao, R.; Davey, M.; Hsu, Y. C.; et al. Navigating the chaperone network: an integrative map of physical and genetic interactions mediated by the hsp90 chaperone. *Cell* 2005, 120 (5), 715-27.

16. McClellan, A. J.; Xia, Y.; Deutschbauer, A. M.; et al. Diverse cellular functions of the Hsp90 molecular chaperone uncovered using systems approaches. *Cell* 2007, 131 (1), 121-35.

33. Gong, Y.; Kahirara, Y.; Krogan, N.; et al. An atlas of chaperone-protein interactions in *Saccharomyces cerevisiae*: implications to protein folding pathways in the cell. *Mol Syst Biol* 2009, 5, 275.

| Zhao - 75 | Parsons - 150 |         | Hsp90 literature - 90 |         | McClellan - 99 |         | Insensitive Strains - 12 | HAS - 16 |       |
|-----------|---------------|---------|-----------------------|---------|----------------|---------|--------------------------|----------|-------|
| YDR320C   | YAL005C       | YHR139C | YLR024C               | YDR283C | YAL002W        | YNL197C | YAL007C                  | YBL008W  | HIR1  |
| YER048C   | YAL019W       | YHR167W | YML057W               | YGL020C | YAL024C        | YNL235C | YAL008W                  | YGL005C  | COG7  |
| YFL016C   | YAL024C       | YJR056C | YAL019W               | YER103W | YBL051C        | YNL294C | YAL015C                  | YGR285C  | ZUO1  |
| YFR041C   | YBL058W       | YJR058C | YML032C               | YER110C | YBR061C        | YNL298W | YAL018C                  | YIR019C  | FLO11 |
| YGL018C*  | YBL101C       | YKL057C | YMR186W               | YAL024C | YBR164C        | YNL322C | YAL020C                  | YJL179W  | PFD1  |
| YGL128C*  | YBR101C       | YKL092C | YAL005C               | YMR097C | YCL005W        | YNL325C | YAL027W                  | YJR073C  | OPI3  |
| YGR285C   | YBR156C       | YLR048W | YLL026W               | YMR098C | YCL008C        | YNR006W | YAL035W                  | YKL037W  | AIM26 |
| YIR004W   | YDL134C       | YLR073C | YLR113W               | YER139C | YDL077C        | YNR051C | YAL036C                  | YLR452C  | SST2  |
| YJL073W   | YDR192C       | YLR328W | YLL024C               | YJR032W | YDL117W        | YOL050C | YAL037W                  | YML071C  | COG8  |
| YJL162C   | YDR200C       | YLR329W | YOR007C               | YER151C | YDR136C        | YOL061W | YAL039C                  | YMR095C  | SNO1  |
| YJR097W   | YDR435C       | YLR344W | YOR027W               | YER156C | YDR253C        | YOL089C | YAL040C                  | YNL064C  | YDJ1  |
| YLR008C*  | YEL025C       | YML005W | YOR023C               | YER145C | YDR260C        | YOR027W | YAL046C                  | YNL098C  | RAS2  |
| YLR090W   | YER056C-A     | YML108W | YOR036W               | YBR101C | YDR276C        | YOR061W |                          | YNL197C  | WHI3  |
| YMR161W   | YER139C       | YMR269W | YNL325C               | YGR257C | YDR335W        | YOR089C |                          | YNL322C  | KRE1  |
| YMR214W   | YFR035C       | YNR009W | YPL253C               | YNL307C | YDR443C        | YOR275C |                          | YPL106C  | SSE1  |
| YNL007C*  | YFR043C       | YOL004W | YNL281W               |         | YER048C        | YPL002C |                          | YPL240C  | HSP82 |
| YNL064C   | YFR053C       | YOL076W | YPL240C               |         | YER072W        | YPL051W |                          |          |       |
| YNL077W   | YGL257C       | YOR087W | YOL018C               |         | YER119C-A      | YPL065W |                          |          |       |
| YNL227C   | YGR235C       | YOR228C | YDR073W               |         | YER120W        | YPL084W |                          |          |       |
| YNL328C   | YGR243W       | YOR239W | YPL193W               |         | YER151C        | YPL225W |                          |          |       |
| YOR254C*  | YHL007C       | YOR270C | YDR418W               |         | YER177W        | YPL240C |                          |          |       |
| YPR061C   | YHL032C       | YOR284W | YPL152W               |         | YFL025C        | YPR119W |                          |          |       |
| YLR259C*  | YHR029C       | YPL036W | YPL106C               |         | YFR036W        |         |                          |          |       |
| YAL005C   | YHR124W       | YPL060W | YHR034C               |         | YGL005C        |         |                          |          |       |
| YBL075C   | YHR162W       | YPL070W | YGR178C               |         | YGL013C        |         |                          |          |       |
| YBR169C   | YHR184W       | YFR043C | YCL037C               |         | YGL045W        |         |                          |          |       |
| YDL229W   | YIL160C       | YPL253C | YER072W               |         | YGL046W        |         |                          |          |       |
| YEL030W   | YIL161W       | YMR095C | YGR123C               |         | YGL151W        |         |                          |          |       |
| YER103W   | YIR004W       | YGR188C | YHL007C               |         | YGL212W        |         |                          |          |       |
| YHR064C   | YIR019C       | YML124C | YHR030C               |         | YGR289C        |         |                          |          |       |
| YJL034W*  | YJL013C       | YDR415C | YHR167W               |         | YHL027W        |         |                          |          |       |
| YJR045C*  | YJR054W       | YOL081W | YKL117W               |         | YHR073W        |         |                          |          |       |
| YKL073W   | YJR109C       | YOR027W | YLR216C               |         | YHR079C        |         |                          |          |       |
| YLL024C   | YKL161C       | YKL205W | YOR216C               |         | YHR167W        |         |                          |          |       |
| YLR369W   | YLL024C       | YER072W | YOR228C               |         | YIL029C        |         |                          |          |       |
| YNL209W   | YLR004C       | YOR216C | YLR362W               |         | YIL035C        |         |                          |          |       |
| YPL106C   | YLR201C       | YMR311C | YLR318W               |         | YIL041W        |         |                          |          |       |
| YMR186W   | YML027W       | YOL032W | YLR319C               |         | YIL053W        |         |                          |          |       |
| YPL240C   | YML086C       | YMR096W | YJL187C               |         | YIL121W        |         |                          |          |       |
| YEL003W   | YML116W       | YML123C | YGL253W               |         | YIL154C        |         |                          |          |       |
| YGR078C   | YML117W       | YBL068W | YDR214W               |         | YIL170W        |         |                          |          |       |

**Figure S5.** Source and process for 360 strains screen to identify heat shock associated strains as indicators for follow up profiles.

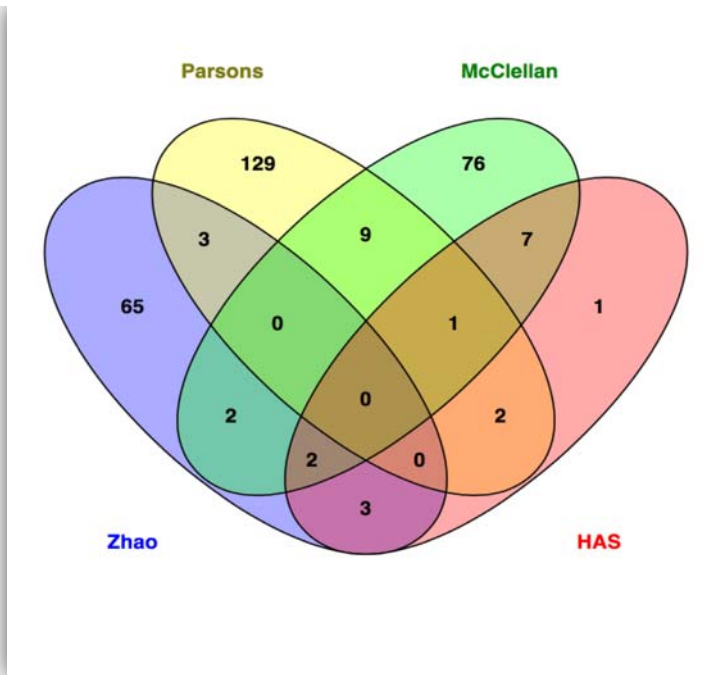

**Common Elements between Datasets**

7 common elements in "McClellan" and "HAS":

- YGL005C                    YNL098C
- YJR073C                   YNL197C
- YKL037W                  YNL322C
- YML071C

1 common element in "Parsons", "McClellan" and "HAS":

- YMR095C

2 common elements in "Parsons" and "HAS":

- YIR019C
- YBL008W

2 common elements in "Zhao", "McClellan" and "HAS":

- YPL240C
- YJL179W

3 common elements in "Zhao" and "HAS":

- YGR285C
- YNL064C
- YPL106C

1 element included exclusively in "HAS":

- YLR452C

**Figure S6.** Venn diagram demonstrating overlap between Heat shock associates strains (HAS) and previous screening efforts

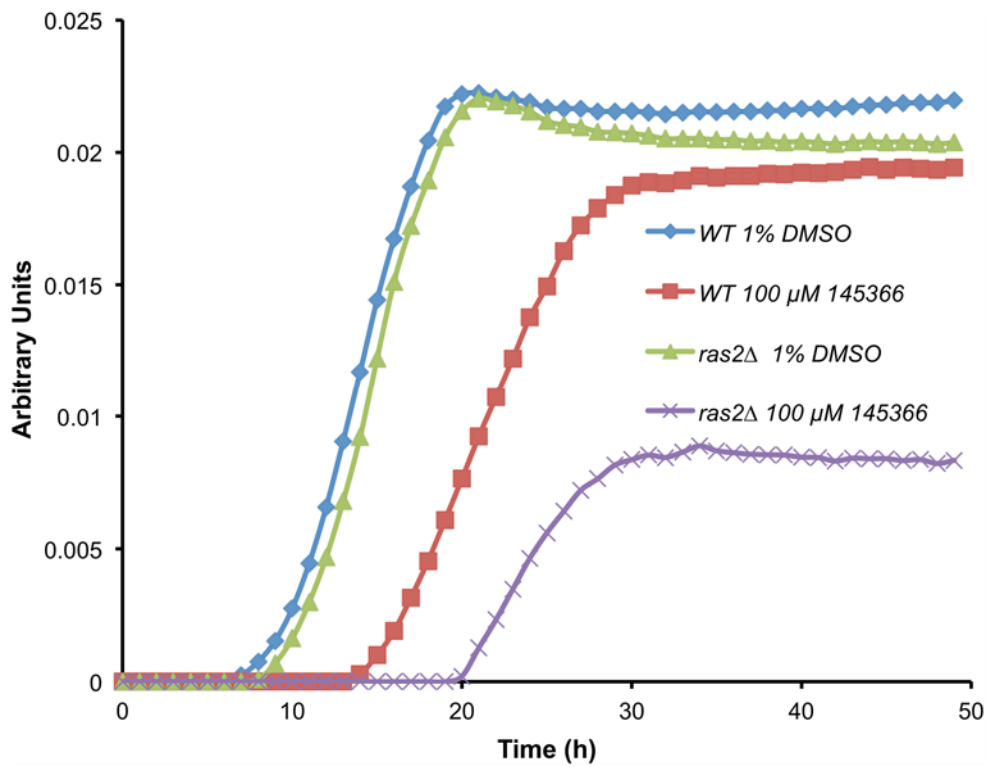

**Figure S7.** Normalized growth curves of *ras2Δ* strain treated with 1% DMSO and 100 μM NSC145366.



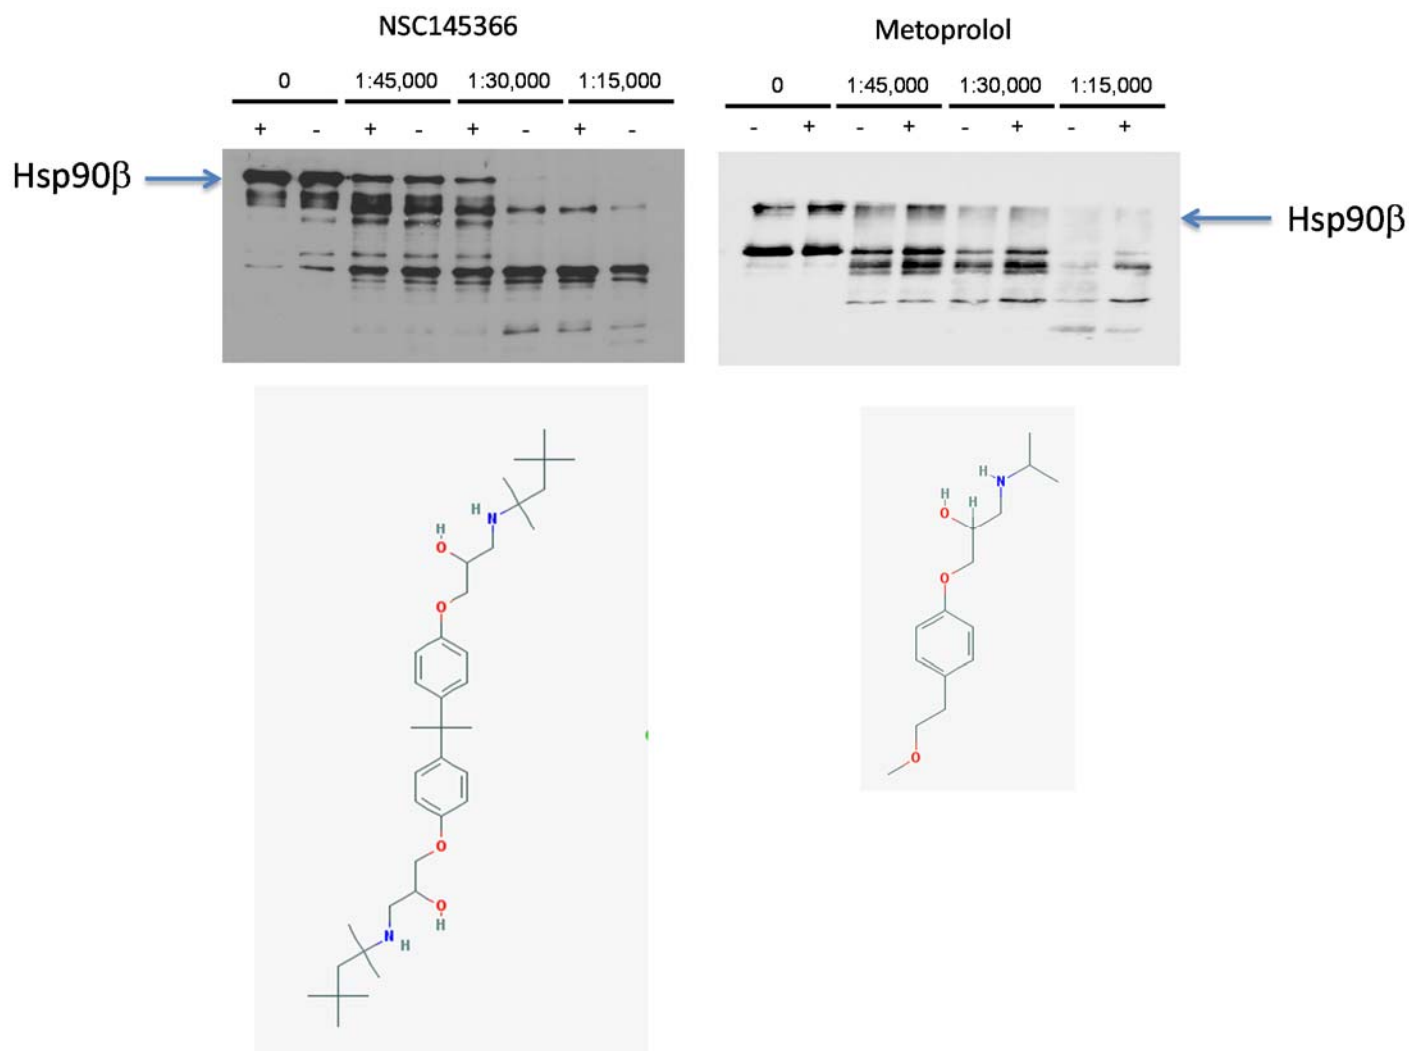

**Figure S8:** Negative control data for DARTs experiments with recombinant Hsp90 beta. The panel on the left is identical to Figure 4A and is used here for visual comparison with the data for the negative control compound metoprolol selected because of common chemical features to NSC145366. Both compounds are at 200  $\mu$ M.

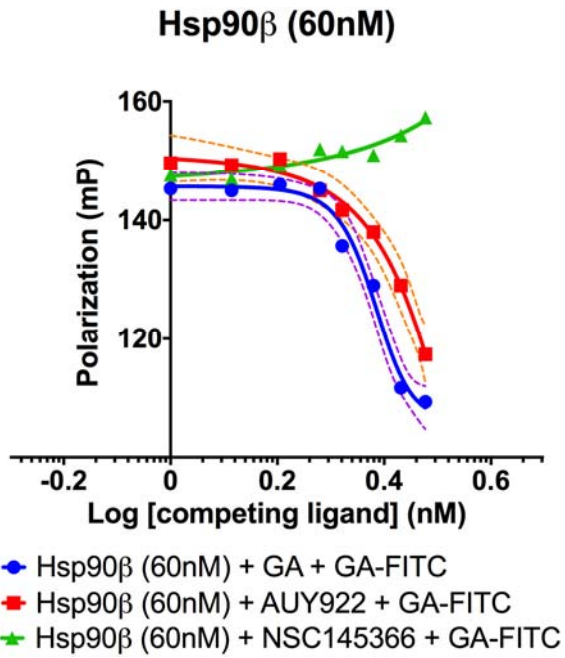

**Figure S9.** Competition assay using Hsp90 inhibitors Geldanamycin (GA), AUY922 and NSC145366 to displace FITC-GA binding to Hsp90 $\beta$ . Known N-terminal ATP site binding compounds GA and AUY922 displace FITC-GA but NSC145366 does not, indicating that NSC145366 does not bind to the Hsp90  $\beta$ N-terminal ATP site.

## Detailed method description of distance measurements:

**Data Analysis for Identification of haploid deletion strains sensitive to Hsp90 inhibitors.** Time-dependent changes in microplate well turbidities were measured by assessing optical density. These data vectors were first normalized using their integrals and the values of the initial turbidity measurements. Mean control- and drug-treated curves for each of the strains were computed. The curves were smoothed employing a robust locally weighted regression function (*lowess*)<sup>1</sup>. For analysis, pairwise distances between curves (yeast strains exposed to a treatment compared to the corresponding DMSO curves) were measured using quadratic form distance (QFD), Euclidean distance, KS distance metric, spectral angle distance (cosine distance), and dynamic time warping (DTW) distance. The final assessment of the curve characteristics was performed using DTW and QFD distances.

The distances were defined as follows:

Euclidean distance: 
$$d(p, q) = \left( \sum_{i=1}^n (q_i - p_i)^2 \right)^{\frac{1}{2}}$$

KS distance: 
$$d(p, q) = \sup \left( \frac{1}{n} \left| \sum_{i=1}^{n-X} p_i - \sum_{i=1}^{n-X} q_i \right| \right), \quad X = 0, 1, \dots, n$$

Cosine distance: 
$$d(p, q) = 1 - \frac{\sum_{i=1}^n p_i q_i}{\left( \sum_{i=1}^n p_i^2 \sum_{i=1}^n q_i^2 \right)^{\frac{1}{2}}}$$

Quadratic form distance: 
$$d(p, q) = \left( \sum_{i=1}^n \sum_{j=1}^n a_{ij} (p_i - q_i)(p_j - q_j) \right)^{\frac{1}{2}}, \quad a_{ij} = \left( 1 + (i - j)^2 \right)^{\frac{1}{2}}$$

The DTW aligns two time series (or other data vectors) by allowing a given data point from one curve to be matched with one or several points on the other curve. The DTW algorithm finds the alignment between the curves that has the minimal cost (in the sense of a local distance measure). This cost of alignment is the DTW distance<sup>2,3</sup>.

The calculated distances were used to determine the curve-Z' factor<sup>4</sup>. In contrast to the univariate Z', the curve-Z' factor is defined employing curves (data vectors), rather than scalar measurements. The curve-Z' uses the 99-percentile of pairwise distances between curves obtained from the same group as a measure of dispersion within a group (instead of the standard deviations used in the univariate Z'), and 50-percentile pairwise distance between two groups of curves as a measure of the expected distance (instead of a difference between means). Note that this definition of Z' is different from the multivariate extension of Z' proposed by Kümmel et al., who performed a projection of multiple readouts to calculate an equivalent to a univariate Z' factor<sup>5</sup>.

We computed the 99-percentile of pairwise distances between curves in the control and treated groups ( $d_{1,1}$ , and  $d_{2,2}$ ), as well as the 50-percentile pairwise distance between curves belonging to two different groups ( $d_{1,2}$ ). The curve-Z' is defined as follows:

$$\text{curve-Z}' = 1 - \frac{d_{1,1}^{[0.99]} + d_{2,2}^{[0.99]}}{d_{1,2}^{[0.5]}}$$

The curve-Z' shows the size of the effect as an overlap/separation between treated and untreated groups. As with the univariate Z' factor, this value indicates to what extent the treatment can cause a large, easily observable effect. In contrast to the traditional univariate screens designed to assist in defining a binary-screen result (hit or no hit), the expectations regarding the curve-Z' values are much more relaxed. In this setting, we do not expect the curve-Z' factor to extend well above 0. For curve-Z' = 0 the average separation between the curves from treated and untreated groups would be twice as large as the 99-percentile of inter-curve distance within a group (assuming an identical variance within compared groups). This would indicate an almost complete separation between the groups (equivalent to a 6-standard deviation separation between the means in the univariate case).

The large number of repeated treatments per strain allowed calculation of p-values using an asymptotic Monte-Carlo permutation test comparing the growth vectors. The statistic used followed the idea presented by Hayden et al. and was defined as follows <sup>6</sup>:

$$s = d_{1,2}^{[0.5]} - \frac{d_{1,1}^{[0.5]} - d_{2,2}^{[0.5]}}{2}$$

where  $d_{x,x}^{[0.5]}$  is the 50-percentile computed from the distribution of pairwise distances between curves in group x, and  $d_{x,y}^{[0.5]}$  is the 50-percentile from the distribution of distances between curves belonging to groups x and y. The p-value for this one-sided test is the probability that the value of the resampled statistic s is equal to or greater than the observed value  $s_{\text{obs}}$ . Therefore

$$\text{p-value} = \frac{P(s \geq s_{\text{obs}}) + 1}{P + 1},$$

where  $P(s \geq s_{\text{obs}})$  is the number of instances in which s is equal to or exceeds the  $s_{\text{obs}}$  value.  $P$  is the total number of permutations. All calculations were performed using R language for statistical computing (<http://www.r-project.org/>) <sup>7</sup>.

**Data Analysis for Chemical Library Screens.** The raw time and optical-density data were normalized using the curve integrals. For the purpose of comparison and quantification, reference readouts/curves were established using WT, *sst2Δ*, *ydj1Δ*, and *hsp82Δ* strains exposed to 1% DMSO. The reference curves for every analyzed strain were compared pairwise to establish a distribution of DTW distances. The distance values at the 95th-percentile of the computed pairwise distance distributions were selected as the parameter above which the measured two curves were considered "significantly dissimilar" (i.e., likely originating from different growth phenotypes). Therefore, any distance between given curves that was below this 95-percentile point were considered not significant and likely occurring owing to natural biological variability.

For further analysis, mean control curves were computed for each of the strains using trimmed means of the repeated measurements at all the given time points. For every mean curve, a reference growth-retardation effect was defined as the DTW distance between a mean curve and a curve from wells containing medium only. Using the significance cut-off for DTW distance at the 95<sup>th</sup> percentile, the fold increase in dissimilarity was calculated for every measured curve / mean-curve pair. The computed parameter was called "response dissimilarity" or v-value. For example, a v-value of 10 means a dissimilarity value 10 ten times larger than the observed variance within the group of curves.

Additional scoring parameters were also computed. A relative difference between the DTW (control, treated sample), and DWT (control, no-growth sample) was scored as %-change values; the value of 1 (or 100%) indicated a DTW distance identical to the distance between the no-growth curve and the mean curve. It is important to point out that the practically observed relative difference could be higher than 100%, since some of the curves obtained from a treated sample may demonstrate a complex or chaotic growth pattern that results in large distance values. It is also important to recognize that the value of 100% reflects different absolute changes in growth (different level of growth retardation) for every one of the four strains, since their respective control mean curves were different.

Summary statistics were computed on the basis of the values defined above (Table S2). The summary included the sum (SUM Index) of all the dissimilarities (for all strains). This parameter was dominated by the greatest dissimilarity value (the strongest response). A high value of the SUM Index indicates that at least one of the strains demonstrated a very strong response to the presence of a drug, or that a number of strains demonstrated modestly strong responses. The diversity index (DIV), another computed summary statistic is defined as the maximum difference between responses exhibited by the tested strains. A small diversity index indicates that all the strains responded in a similar fashion, whereas a high value shows that some strains respond differently than the others did. All these calculations were performed using R language for statistical computing (<http://www.r-project.org/>). The compounds displaying SUM > 100 < 250, DIV > 50, % change < 150, and V > 1 were class I compounds. Class III compounds were defined as those that showed weak or no response in all four strains, i.e., having a DIV Index < 40. Artifacts were defined as compounds having Sum Index > 400 and DIV Index > 100.

#### Additional references for data analysis methods.

1. Cleveland WS: LOWESS: A Program for Smoothing Scatterplots by Robust Locally Weighted Regression. *The American Statistician* 1981; 35.

2. Gaudin R, Nicoloyannis N: An Adaptable Time Warping Distance for Time Series Learning. Paper presented at the Machine Learning and Applications, 2006 ICMLA '06 5th International Conference on, Dec. 2006 2006.
3. Müller M: Dynamic Time Warping. *Information Retrieval for Music and Motion*: Springer Berlin Heidelberg, 2007:69-84.
4. Zhang J-H, Chung TDY, Oldenburg KR: A Simple Statistical Parameter for Use in Evaluation and Validation of High Throughput Screening Assays. *Journal of Biomolecular Screening* 1999; 4:67-73.
5. Kümmel A, Gubler H, Gehin P, Beibel M, Gabriel D, Parker CN: Integration of Multiple Readouts into the Z' Factor for Assay Quality Assessment. *Journal of Biomolecular Screening* 2010; 15:95-101.
6. Hayden D, Lazar P, Schoenfeld D, for The Inflammation and the Host Response to Injury I: Assessing Statistical Significance in Microarray Experiments Using the Distance Between Microarrays. *PLoS ONE* 2009; 4:e5838.
7. Ihaka R, Gentleman R: R: a language for data analysis and graphics. *Journal of Computational and Graphical Statistics* 1996; 5:299-314.
