# Supplementary material
Source: PubMed Central journal article supplement (PMC6521697)
Supplement: NIHMS1013385-supplement-Table_S1.pdf [file NIHMS1013385-supplement-Table_S1.pdf]

---

**Tab Name**

---

Figure S2 Growth ratios

Figure S2 OD600 t=0.8 values

Example of 8 graphs

CKA2

COG6

CPR6

CPR7

ECI1

GCN2

ECM10

GLC8

GPA2

HSC82

HSP31

HSP40 (YDJ1)

HSP82

HSP82 (2nd replicate)

HSP12

HSP26

HSP30

HSP42

HSP48

KTR4

MON1

PFK1

PHO4

PHO86

PKH1

PRS3

SBA1

SIN3  
SSA1  
SSE1  
SST2  
STE2  
STI1  
TOM1  
TPK3  
TUB3  
VAC17  
YDJ1 (2nd replicate)

---

---

**Description**

The growth ratios for the initial strain set profiled against geldanamycin, radicicol and novobiocin and depicted in the Figure S2 heatmap.

The fitness values and time to reach 0.8 for strains used in Figure S1.

Example of the optical density curves for 8 strains

Cka2 deletion strain optical density data and associated graph

COG6 deletion strain optical density data and associated graph

CPR6 deletion strain optical density data and associated graph

CPR7 deletion strain optical density data and associated graph

ECI1 deletion strain optical density data and associated graph

GCN2 deletion strain optical density data and associated graph

ECM10 deletion strain optical density data and associated graph

GLC8 deletion strain optical density data and associated graph

GPA2 deletion strain optical density data and associated graph

HSC82 deletion strain optical density data and associated graph

HSP31 deletion strain optical density data and associated graph

HSP40 deletion strain optical density data and associated graph

HSP82 deletion strain optical density data and associated graph

HSP82 deletion strain optical density data and associated graph

HSP12 deletion strain optical density data and associated graph

HSP26 deletion strain optical density data and associated graph

HSP30 deletion strain optical density data and associated graph

HSP42 deletion strain optical density data and associated graph

HSP48 deletion strain optical density data and associated graph

KTR4 deletion strain optical density data and associated graph

MON1 deletion strain optical density data and associated graph

PFK1 deletion strain optical density data and associated graph

PHO4 deletion strain optical density data and associated graph

PHO86 deletion strain optical density data and associated graph

PKH1 deletion strain optical density data and associated graph

PRS3 deletion strain optical density data and associated graph

SBA1 deletion strain optical density data and associated graph

SIN3 deletion strain optical density data and associated graph  
SSA1 deletion strain optical density data and associated graph  
SSE1 deletion strain optical density data and associated graph  
SST2 deletion strain optical density data and associated graph  
STE2 deletion strain optical density data and associated graph  
STI1 deletion strain optical density data and associated graph  
TOM1 deletion strain optical density data and associated graph  
TPK3 deletion strain optical density data and associated graph  
TUB3 deletion strain optical density data and associated graph  
VAC17 deletion strain optical density data and associated graph  
YDJ1 deletion strain optical density data and associated graph

| DELETION STRAIN | Normalized Growth Ratio* |        |       |       |        |          |
|-----------------|--------------------------|--------|-------|-------|--------|----------|
|                 | GA 3uM                   | GA 7uM | RAD3  | RAD10 | RAD 30 | NOVO 250 |
| CKA2            | 0.2                      | 0.46   | 0.47  | 0.78  | 1.96   | -0.05    |
| COG6            | 0.11                     | 0.22   | 0.17  | 0.17  | 0.4    | 0.39     |
| CPR6            | -0.04                    | 0.09   | 0.05  | 0.18  | 0.22   | -0.1     |
| CPR7            | 0                        | 0.18   | 0.23  | 0.47  | 1.73   | -0.23    |
| ECI1            | 0.86                     | 0.12   | 0.2   | 0.27  | 0.49   | -0.04    |
| GCN2            | -0.05                    | 0.12   | 0.09  | 0.26  | 1.73   | 2.36     |
| ECM10           | -0.08                    | 0.03   | 0.21  | 0.32  | 0.43   | 0.02     |
| GLC8            | -0.02                    | 0      | 0.15  | 0.25  | 3.02   | -0.14    |
| GPA2            | -0.03                    | 0.07   | 0.18  | 0.3   | 2.66   | 0.1      |
| HSC82           | -0.14                    | -0.13  | -0.09 | -0.12 | -0.4   | -0.08    |
| HSP31           | -0.11                    | -0.05  | -0.07 | -0.07 | -0.02  | -0.2     |
| HSP40           | 0.91                     | 3.75   | 4.09  | 3.19  | 1.93   | 0.03     |
| HSP82           | -0.06                    | 0.02   | -0.04 | 0.01  | 0.14   | -0.07    |
| HSP82           | -0.03                    | 0.18   | 0.11  | 0.26  | 2.58   | 0        |
| HSP12           | -0.08                    | -0.04  | 0.02  | 0.04  | 0.21   | -0.13    |
| HSP26           | -0.09                    | -0.05  | 0.04  | 0.02  | 0.08   | -0.11    |
| HSP30           | -0.1                     | 0      | 0     | 0.01  | 0.12   | -0.07    |
| HSP42           | -0.1                     | -0.08  | -0.05 | -0.06 | -0.1   | -0.07    |
| HSP48           | -0.09                    | -0.02  | 0.05  | 0.14  | 0.02   | -0.1     |
| KTR4            | -0.08                    | -0.07  | 0.06  | -0.01 | 0.07   | -0.12    |
| MON1            | 0                        | 0.05   | 0.13  | 0.49  | 2.64   | 0.08     |
| PFK1            | -0.07                    | -0.13  | 0     | -0.13 | -0.11  | -0.1     |
| PHO4            | -0.06                    | -0.1   | -0.07 | -0.1  | -0.12  | -0.07    |
| PHO86           | -0.09                    | -0.11  | -0.04 | -0.07 | -0.07  | -0.09    |
| PKH1            | 0.03                     | 0.02   | 0.15  | 0.68  | 0.31   | 0.03     |
| PRS3            | 0.19                     | 1.44   | 1.62  | 1.15  | 0.5    | -0.2     |
| SBA1            | -0.06                    | 0.09   | 0.3   | 1.08  | 3.02   | -0.16    |
| SIN3            | -0.05                    | 0.03   | 0.09  | 0.14  | 1.69   | -0.31    |
| SSA1            | -0.08                    | -0.11  | 0.04  | 0.25  | 0.43   | 0.16     |
| SSE1            | 0.03                     | 0.08   | 0.31  | 0.83  | 2.22   | -0.18    |
| SST2            | -0.1                     | -0.07  | -0.05 | 0.05  | 2.22   | 2.96     |
| STE2            | -0.09                    | -0.12  | 0.04  | 0.15  | 0.51   | -0.13    |

|       |       |       |       |       |      |       |
|-------|-------|-------|-------|-------|------|-------|
| STI1  | 0.13  | 0.46  | 0.38  | 4.02  | 2.51 | -0.12 |
| TOM1  | -0.11 | 0.03  | 0.02  | 0.1   | 0    | -0.01 |
| TPK3  | -0.07 | -0.02 | 0.02  | 0.22  | 0.45 | 0.1   |
| TUB3  | -0.04 | 0.04  | 0.22  | 0.76  | 2.94 | -0.04 |
| VAC17 | -0.18 | -0.13 | -0.04 | -0.12 | 0.02 | -0.02 |
| YDJ1  | 0.7   | 3.61  | 3.95  | 3.07  | 1.85 | -0.18 |

\* Growth Ratio was normalized to wildtype. The ratio was determined at each drug concentration as follows:

Ratio = Deletion strain OD600 0.8(corrected for fitness value)/Wildtype strain OD600 0.8

The Growth Ratio was subtracted by 1 to depict all the ratios relative to wildtype for visualization on the heatmap (wildtype ratio = 1 for each con



dition)



## TIME TAKEN TO REACH OD600 of 0.8

| DELETION STRAIN | NO DRUG | FITNESS VALUE* | GA 3uM** | GA 7uM | NOVO 100 | NOVO 250 |
|-----------------|---------|----------------|----------|--------|----------|----------|
| WILDTYPE        | 12.625  | 1.00           | 13.38    | 14.88  | 14.38    | 19.63    |
| WILDTYPE        | 11.875  | 1.00           | 12.88    | 14.13  | 14.63    | 17.63    |
| CKA2            | 14.125  | 0.84           | 16.08    | 21.71  | 14.14    | 18.60    |
| COG6            | 11.825  | 1.00           | 14.89    | 18.20  | 16.70    | 27.24    |
| CPR6            | 12.325  | 0.96           | 12.84    | 16.21  | 13.32    | 17.66    |
| CPR7            | 17.825  | 0.67           | 13.41    | 17.54  | 12.87    | 15.07    |
| ECI1            | 12.325  | 0.96           | 24.88    | 16.69  | 16.21    | 18.91    |
| GCN2            | 17.825  | 0.67           | 12.74    | 16.74  | 14.74    | 65.95    |
| ECM10           | 12.825  | 0.93           | 12.34    | 15.39  | 14.19    | 20.02    |
| FES1            | 0       | 0.00           | 0.00     | 0.00   | 0.00     | 0.00     |
| GLC8            | 12.125  | 0.98           | 13.05    | 14.81  | 13.34    | 16.97    |
| GPA2            | 13.325  | 0.89           | 13.03    | 15.89  | 14.55    | 21.50    |
| HSC82           | 13.825  | 0.86           | 11.45    | 12.99  | 13.85    | 18.15    |
| HSP31           | 13.125  | 0.90           | 11.88    | 14.14  | 12.33    | 15.68    |
| HSP40           | 16.625  | 0.71           | 25.59    | 70.71  | 15.45    | 20.23    |
| HSP82           | 12.825  | 0.93           | 12.62    | 15.12  | 13.54    | 18.17    |
| HSP82           | 13.625  | 0.87           | 12.92    | 17.54  | 13.18    | 19.72    |
| HSP12           | 12.625  | 0.94           | 12.35    | 14.23  | 13.76    | 17.05    |
| HSP26           | 12.875  | 0.92           | 12.11    | 14.18  | 14.18    | 17.41    |
| HSP30           | 13.125  | 0.90           | 12.10    | 14.82  | 13.91    | 18.21    |
| HSP42           | 13.125  | 0.90           | 12.10    | 13.68  | 13.23    | 18.21    |
| HSP48           | 12.875  | 0.92           | 12.11    | 14.64  | 13.72    | 17.64    |
| KTR4            | 13.625  | 0.87           | 12.31    | 13.84  | 12.75    | 17.32    |
| MON1            | 13.375  | 0.89           | 13.43    | 15.65  | 14.76    | 21.20    |
| PFK1            | 16.625  | 0.71           | 12.41    | 12.95  | 12.77    | 17.59    |
| PHO4            | 11.625  | 1.02           | 12.64    | 13.41  | 13.41    | 18.26    |
| PHO86           | 12.375  | 0.96           | 12.11    | 13.31  | 13.07    | 17.87    |
| PKH1            | 12.375  | 0.96           | 13.79    | 15.23  | 15.23    | 20.27    |
| PRS3            | 32.375  | 0.37           | 15.91    | 36.31  | 13.98    | 15.73    |
| SBA1            | 12.125  | 0.98           | 12.61    | 16.28  | 14.08    | 16.53    |
| SIN3            | 18.125  | 0.66           | 12.69    | 15.31  | 12.37    | 13.51    |
| SSA1            | 12.625  | 0.94           | 12.35    | 13.29  | 14.46    | 22.69    |
| SSE1            | 15.125  | 0.79           | 13.84    | 16.00  | 13.25    | 16.19    |
| SST2            | 15.125  | 0.79           | 12.07    | 13.84  | 20.51    | 77.73    |
| STE2            | 12.625  | 0.94           | 12.11    | 13.05  | 13.05    | 17.05    |
| STI1            | 13.875  | 0.86           | 15.08    | 21.72  | 14.23    | 17.22    |

|              |        |      |       |       |       |       |
|--------------|--------|------|-------|-------|-------|-------|
| <b>TOM1</b>  | 15.375 | 0.77 | 11.88 | 15.35 | 13.42 | 19.41 |
| <b>TPK3</b>  | 11.875 | 1.00 | 12.38 | 14.63 | 14.13 | 21.63 |
| <b>TUB3</b>  | 12.375 | 0.96 | 12.83 | 15.47 | 14.27 | 18.83 |
| <b>VAC17</b> | 13.875 | 0.86 | 11.02 | 12.94 | 12.52 | 19.15 |
| <b>YDJ1</b>  | 17.125 | 0.69 | 22.80 | 68.65 | 12.92 | 16.04 |

\* Fitness value was determined by dividing the growth time for the deletion strain with no drug compared to the wild-type strain with no drug

\*\* time is shown in hours after correction for the fitness value of the deletion strain with no drug

| <b>RAD 3</b> | <b>RAD 10</b> | <b>RAD 30</b> |
|--------------|---------------|---------------|
| 13.88        | 16.88         | 24.13         |
| 14.88        | 18.88         | 32.38         |
| 20.45        | 30.12         | 71.46         |
| 16.19        | 19.71         | 33.77         |
| 14.57        | 19.87         | 29.51         |
| 17.07        | 24.73         | 65.95         |
| 16.69        | 21.51         | 35.96         |
| 15.07        | 21.20         | 65.95         |
| 16.78        | 22.34         | 34.56         |
| 0.00         | 0.00          | 0.00          |
| 15.99        | 21.18         | 96.96         |
| 16.33        | 21.95         | 88.23         |
| 12.56        | 14.88         | 14.45         |
| 12.96        | 15.68         | 23.64         |
| 70.71        | 70.71         | 70.71         |
| 13.26        | 16.97         | 27.43         |
| 15.36        | 21.24         | 86.28         |
| 14.23        | 17.52         | 29.28         |
| 14.41        | 17.18         | 25.94         |
| 13.91        | 17.08         | 27.03         |
| 13.23        | 15.95         | 21.83         |
| 14.64        | 19.25         | 24.65         |
| 14.71        | 16.67         | 25.82         |
| 15.65        | 25.19         | 87.90         |
| 13.84        | 14.73         | 21.52         |
| 12.90        | 15.19         | 21.32         |
| 13.31        | 15.71         | 22.43         |
| 15.95        | 28.43         | 31.55         |
| 36.31        | 36.31         | 36.31         |
| 18.00        | 35.14         | 96.96         |
| 15.15        | 19.25         | 64.86         |
| 14.46        | 21.05         | 34.45         |
| 18.16        | 30.91         | 77.73         |
| 13.25        | 17.76         | 77.73         |
| 14.46        | 19.40         | 36.33         |
| 19.15        | 84.73         | 84.73         |

|       |       |       |
|-------|-------|-------|
| 14.19 | 18.63 | 24.23 |
| 14.13 | 20.63 | 34.88 |
| 16.91 | 29.63 | 95.00 |
| 13.37 | 14.87 | 24.71 |
| 68.65 | 68.65 | 68.65 |

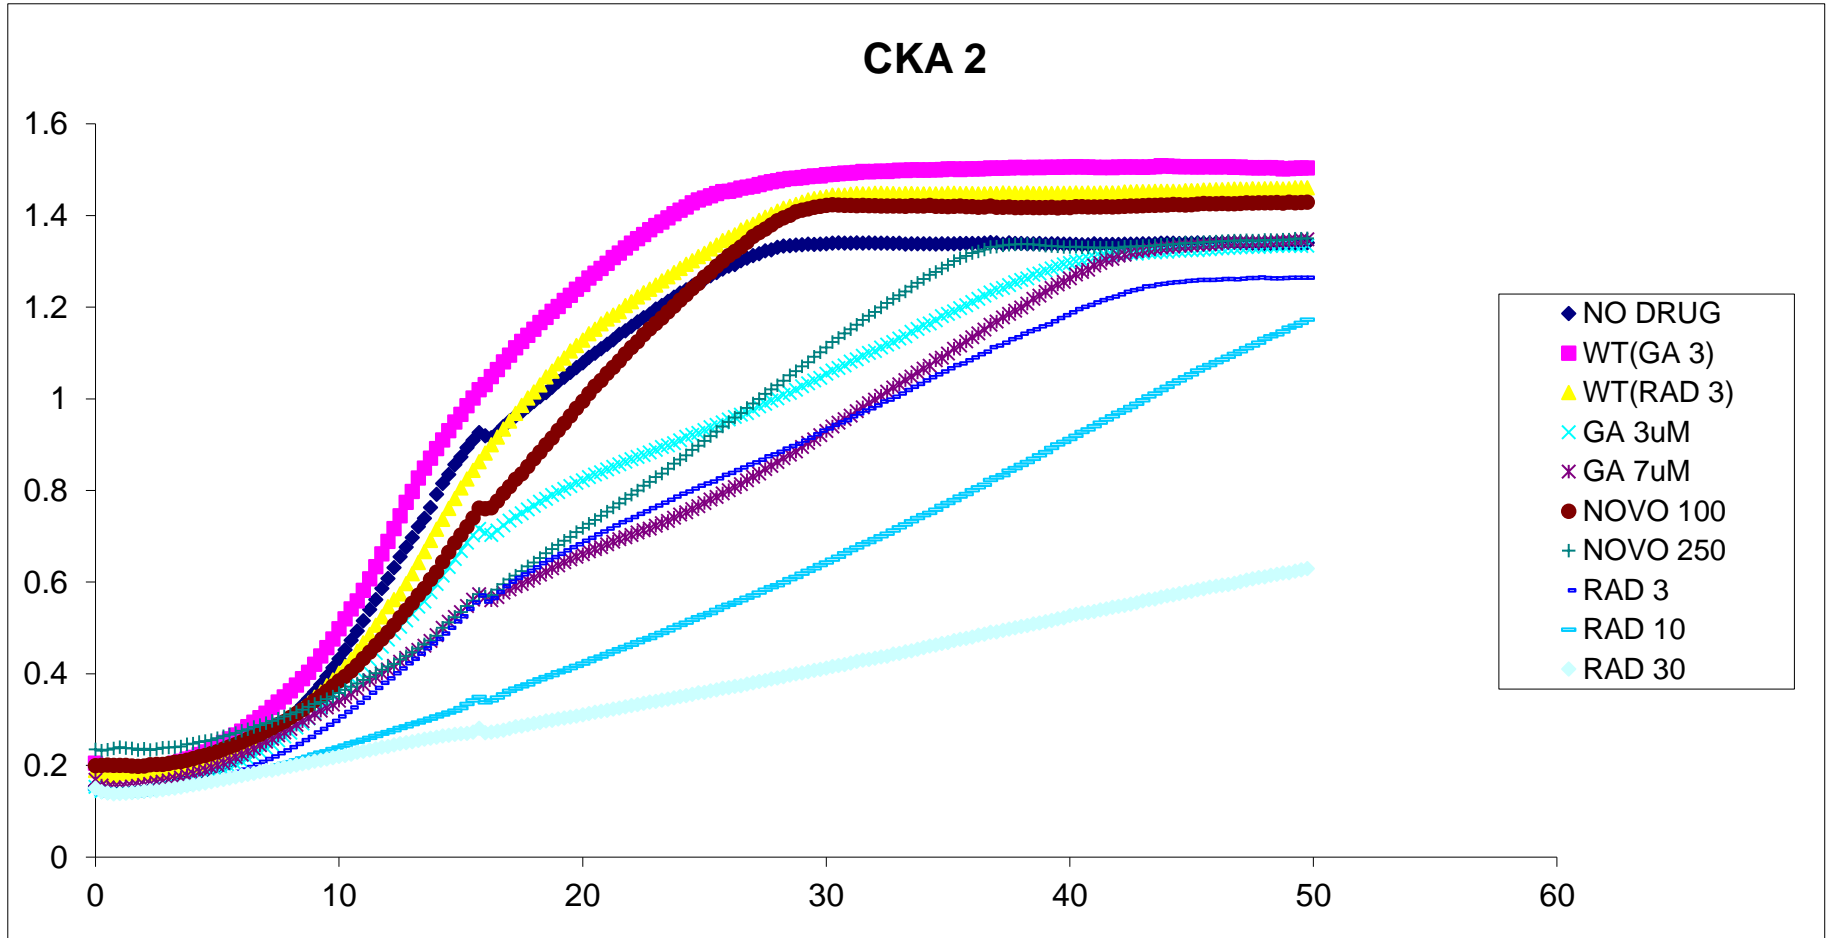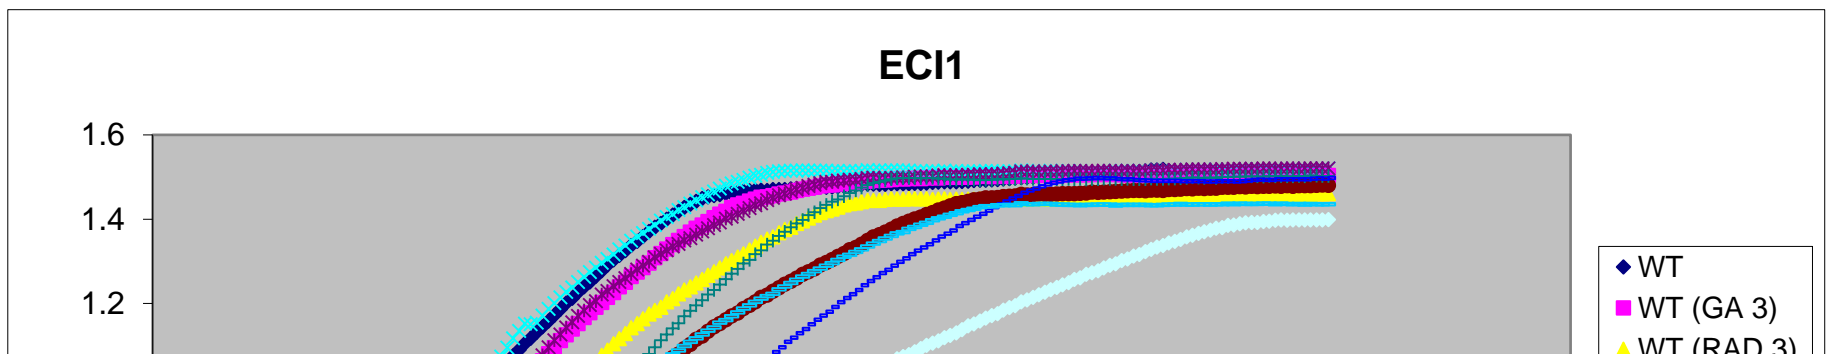



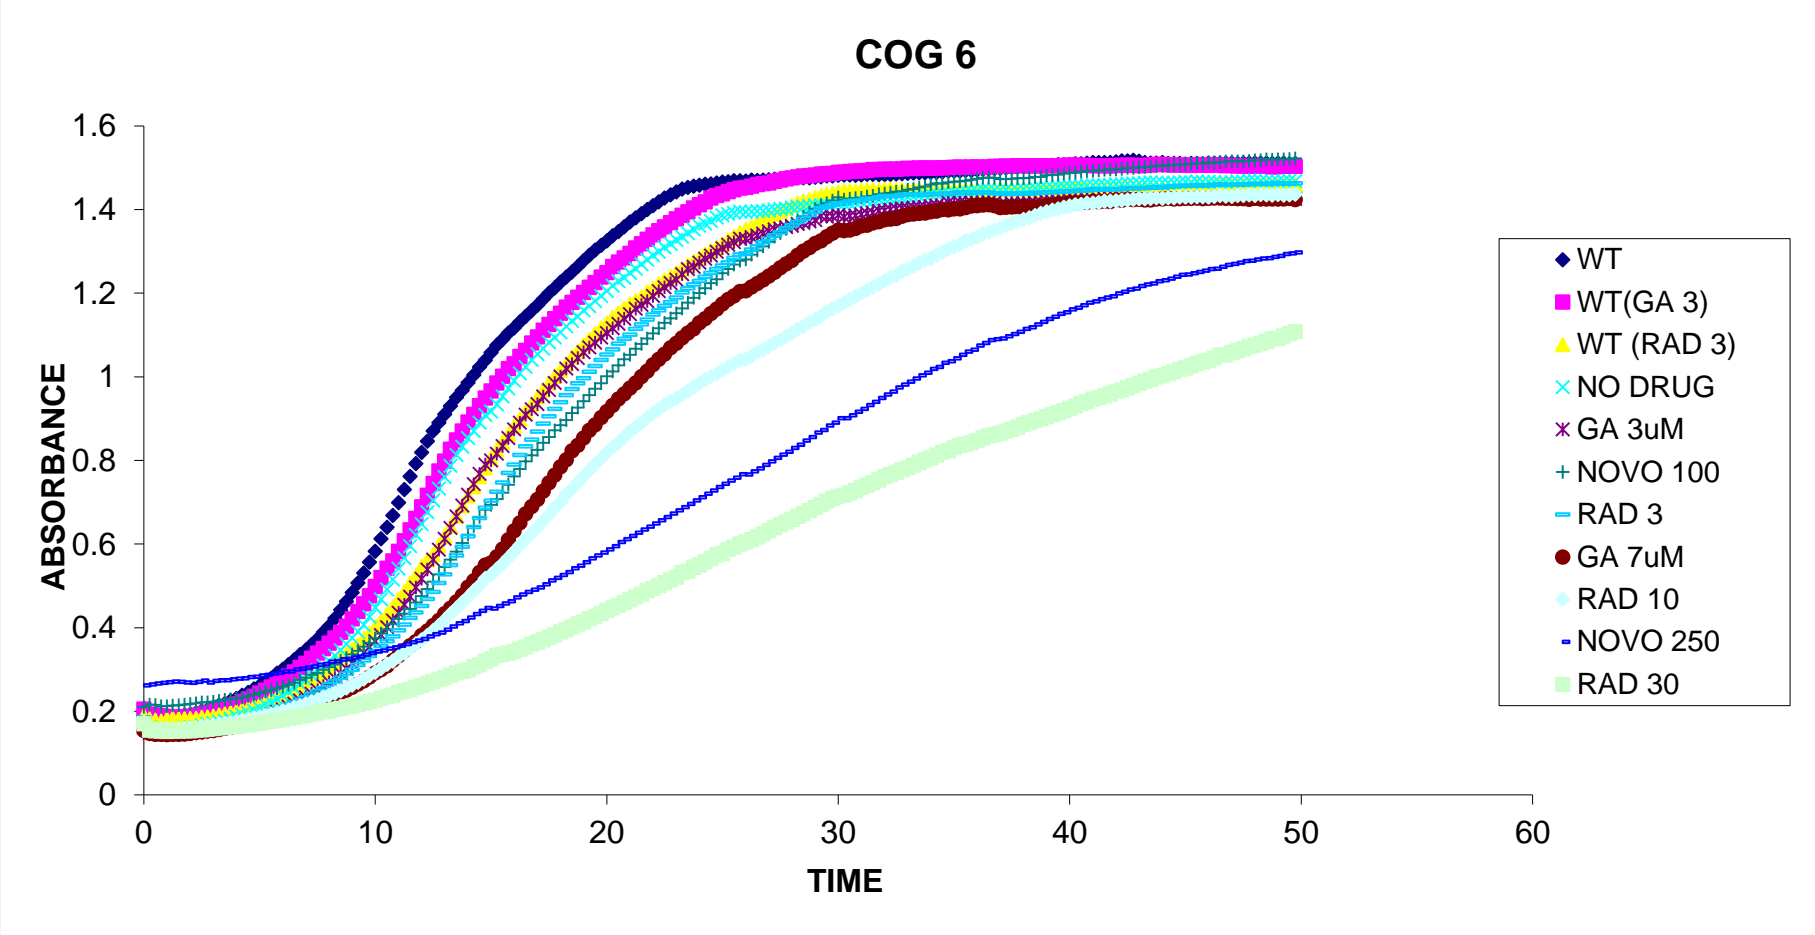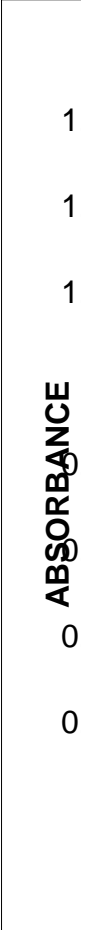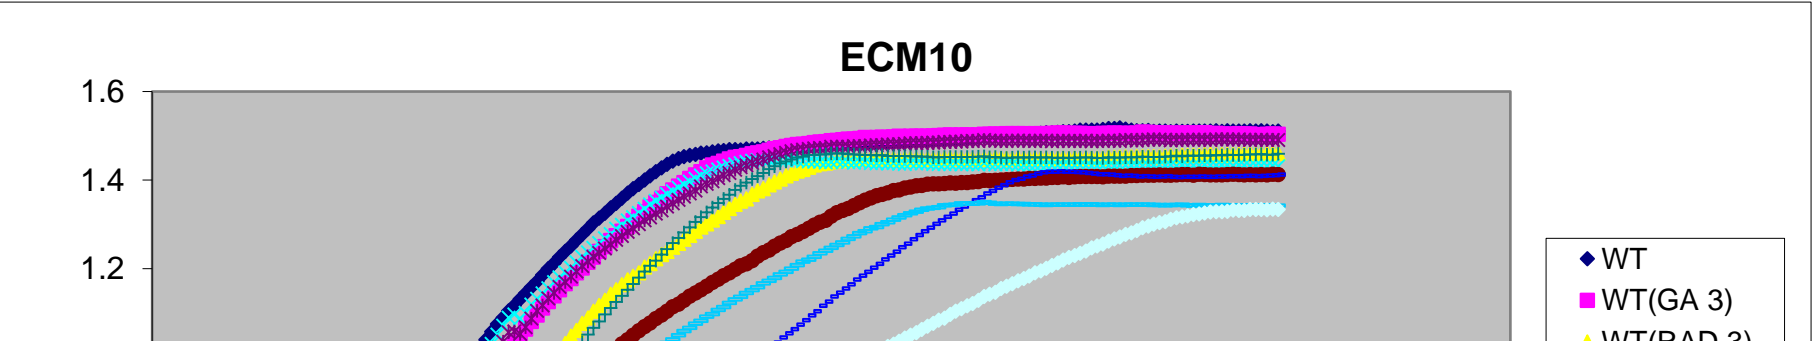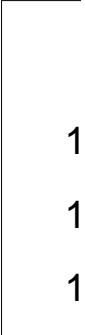

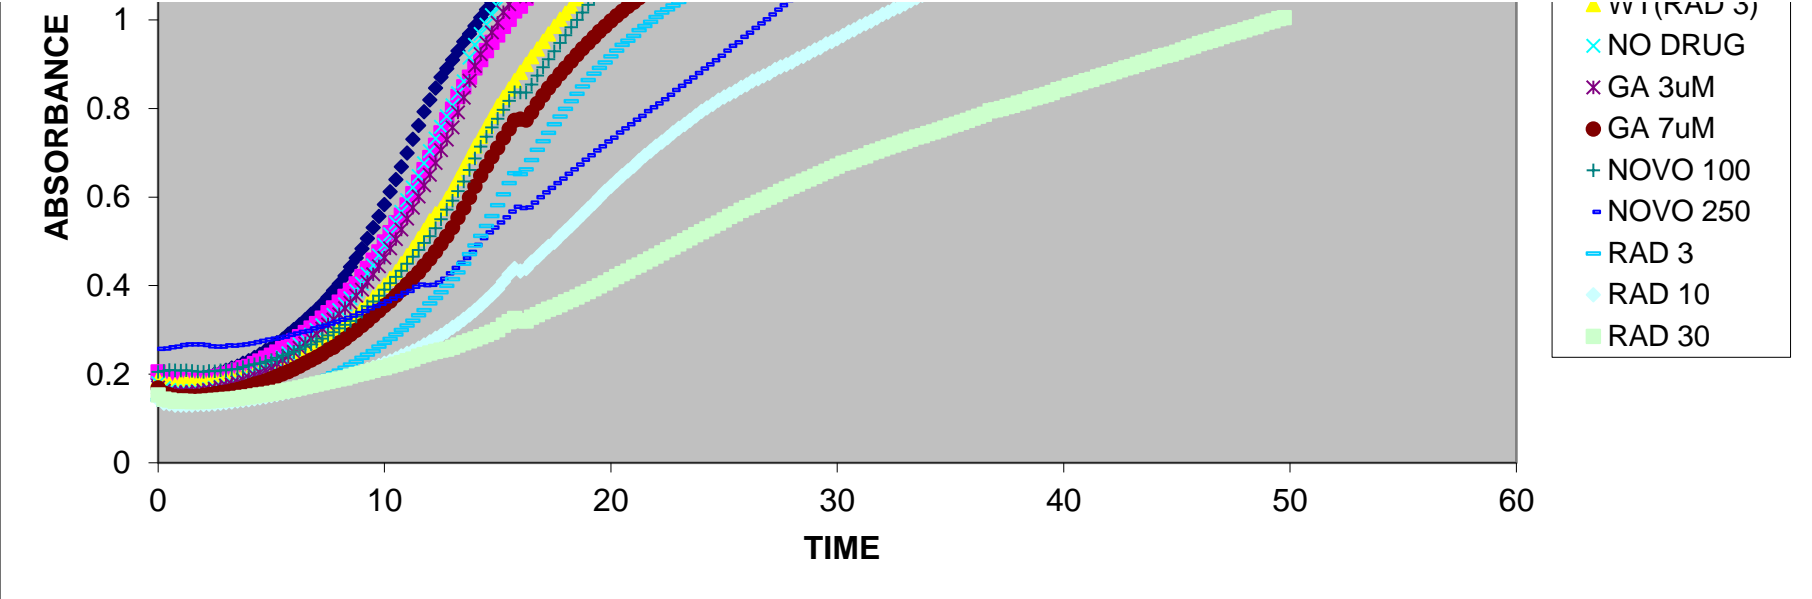

ABSORBANCE<sub>1</sub>



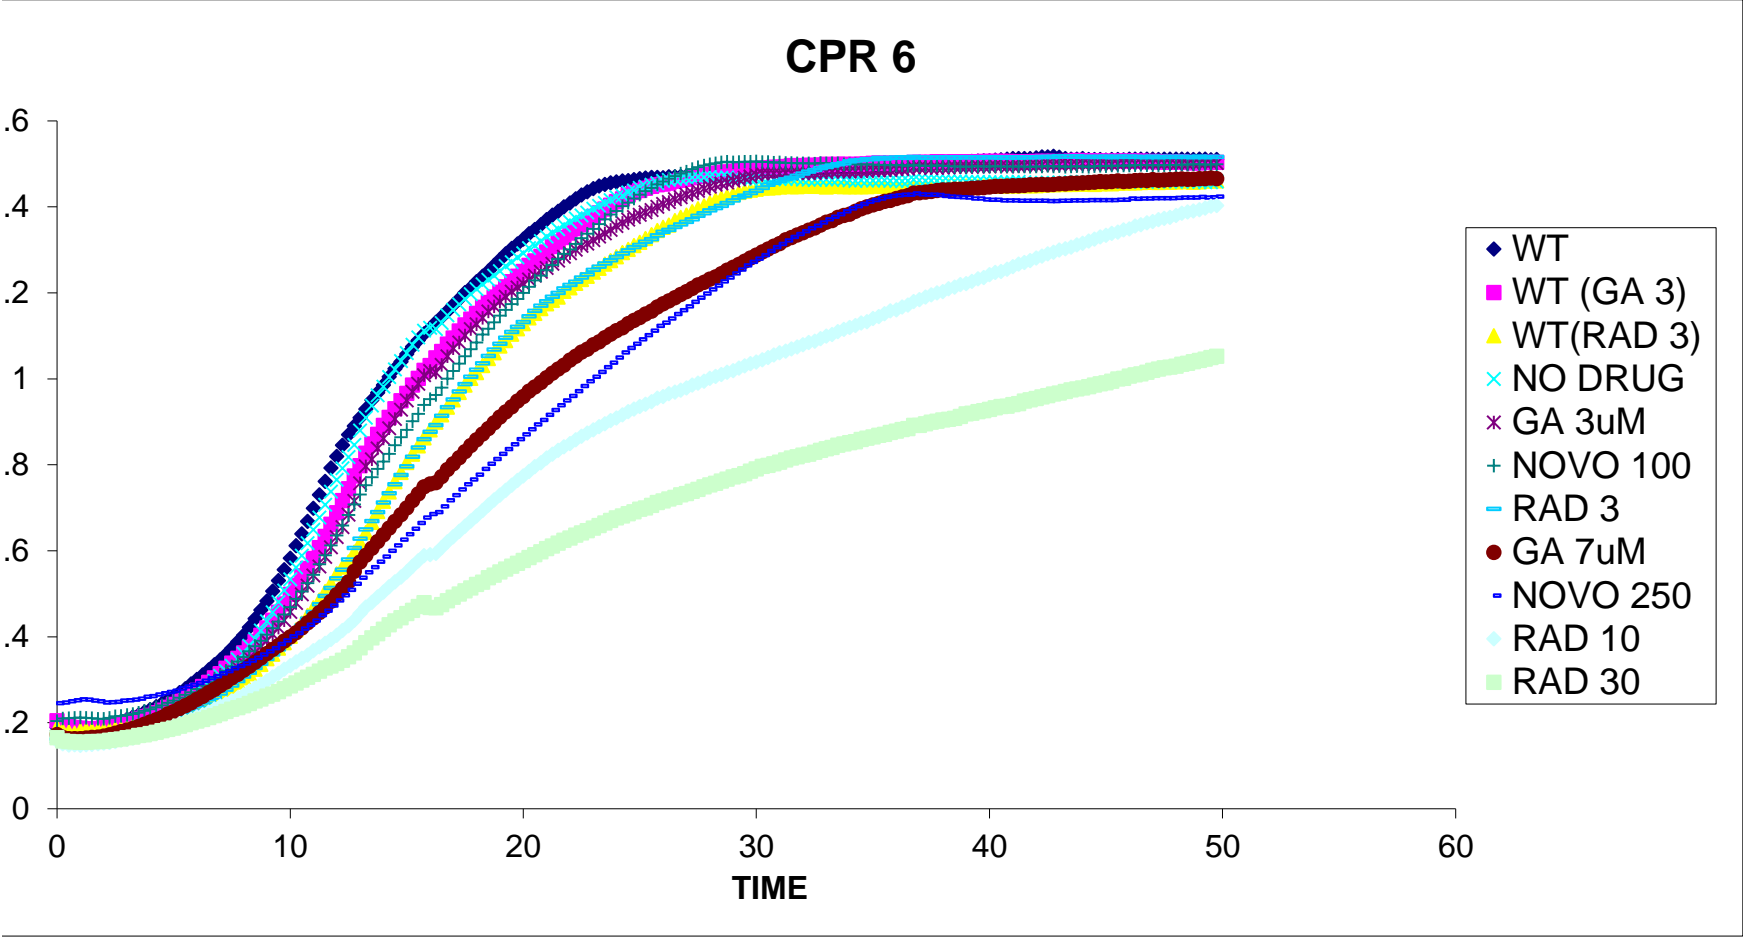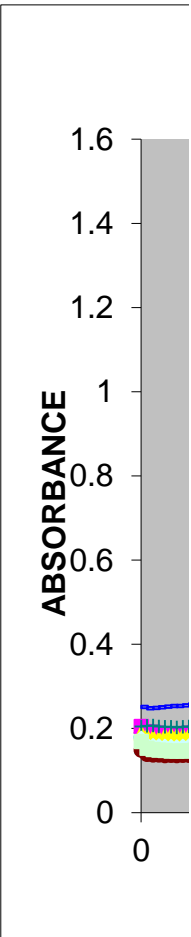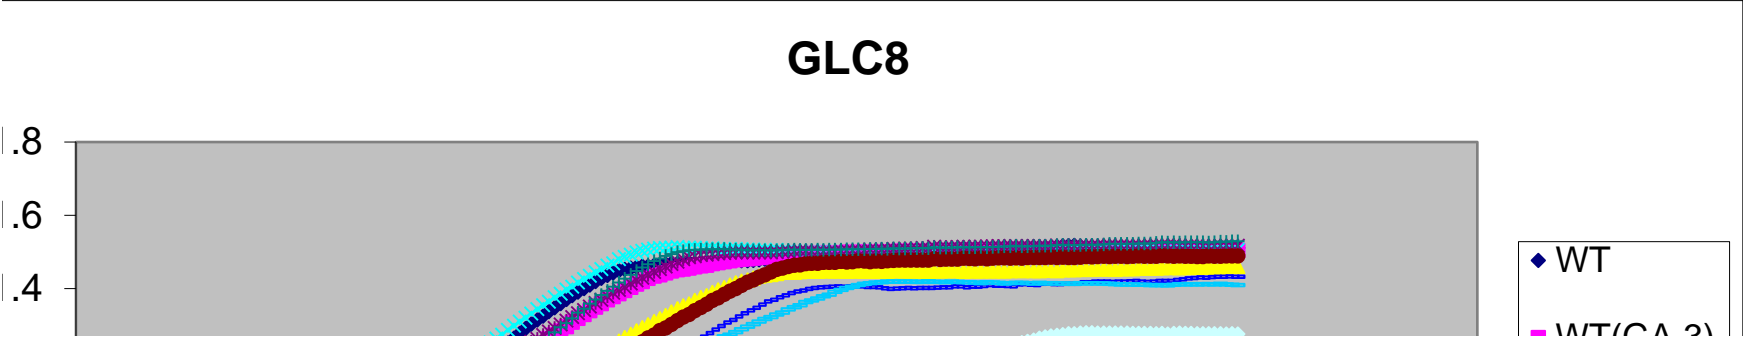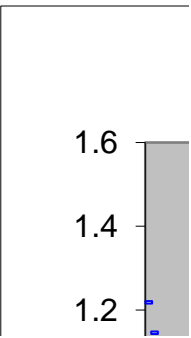

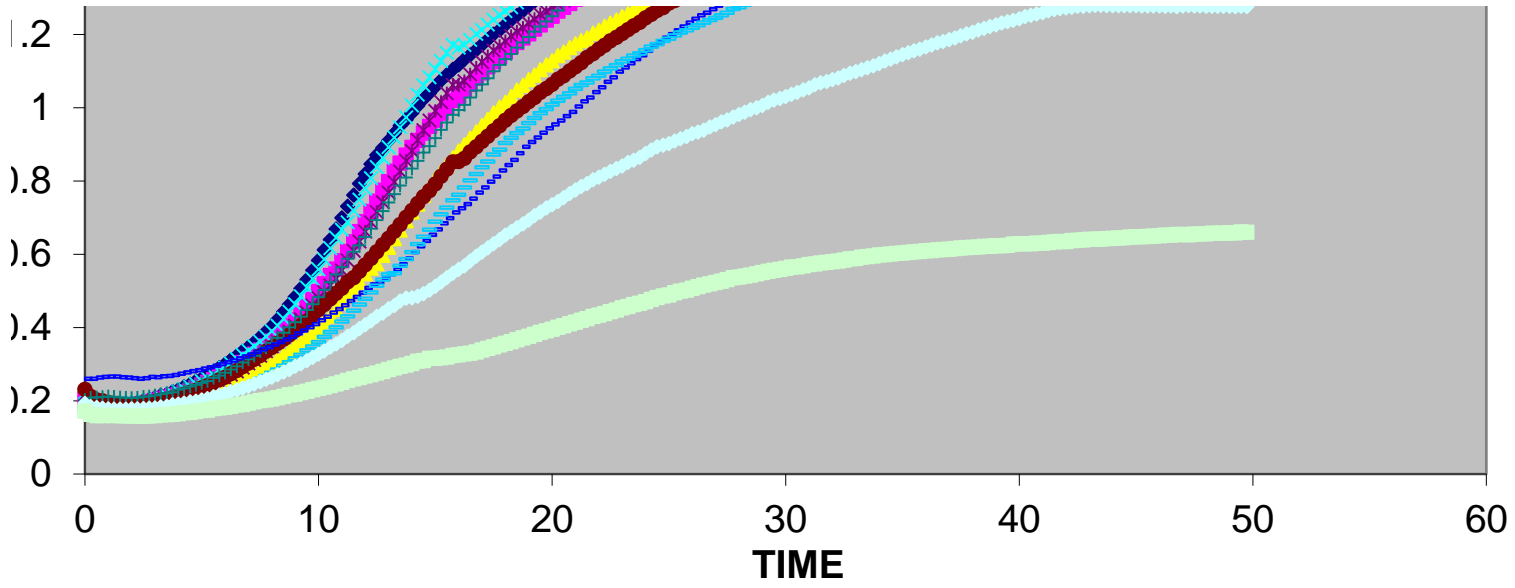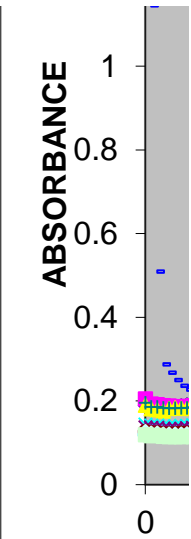

### CPR 7

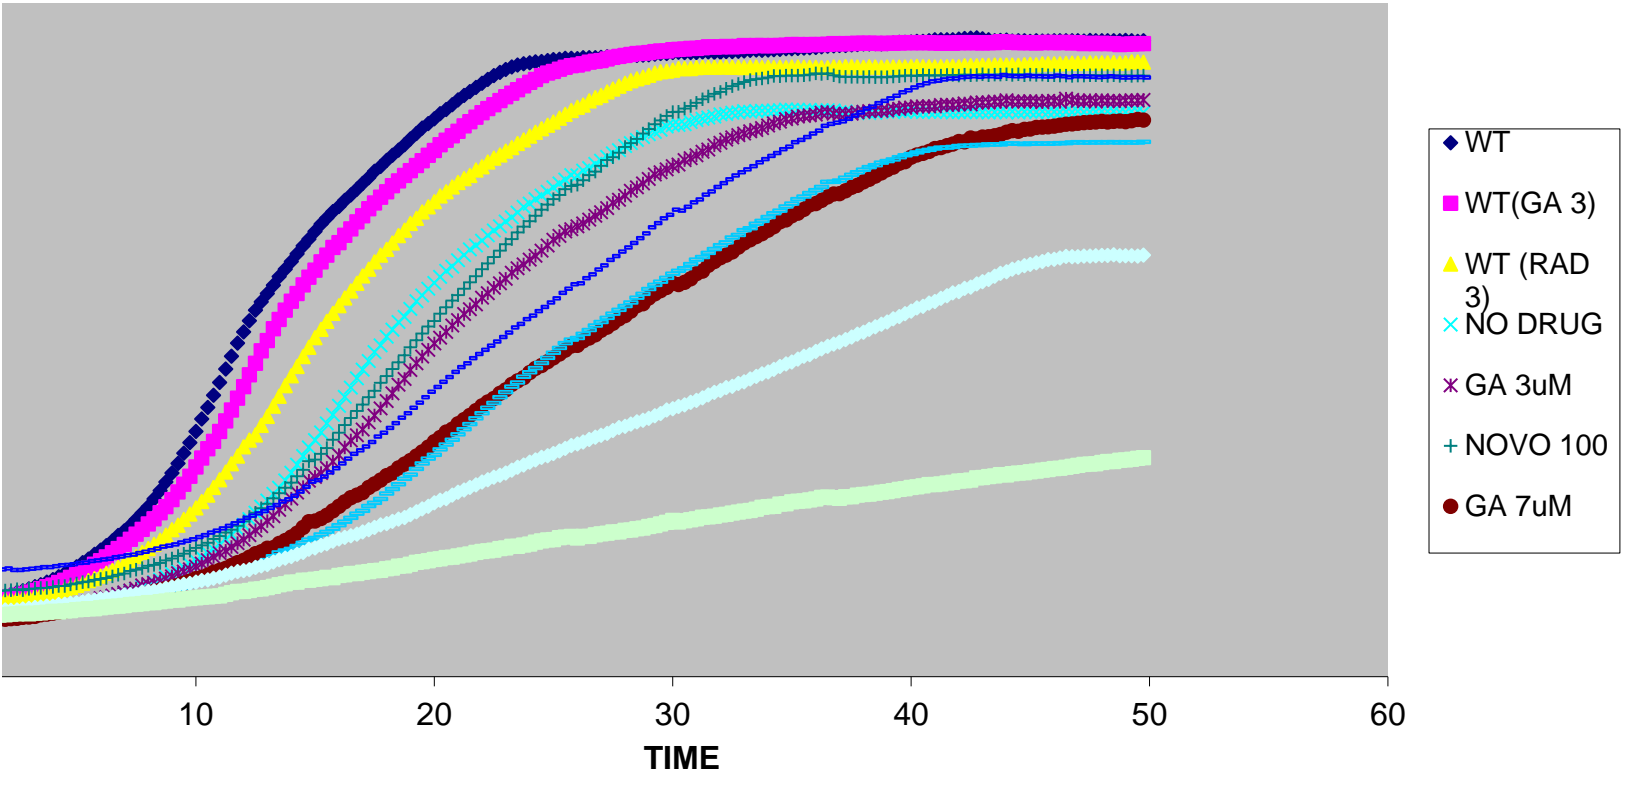

### GPA2

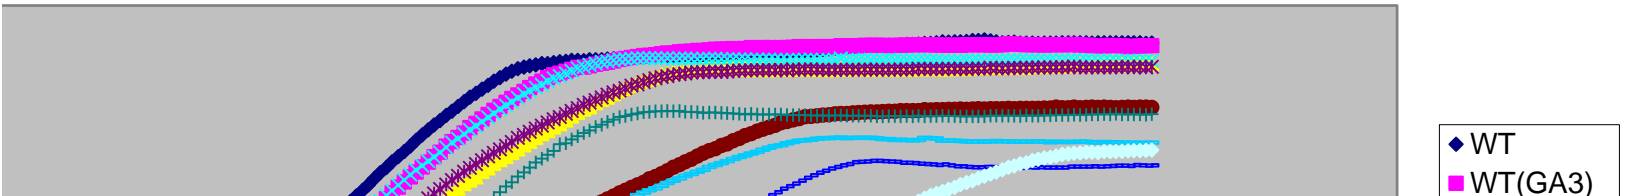

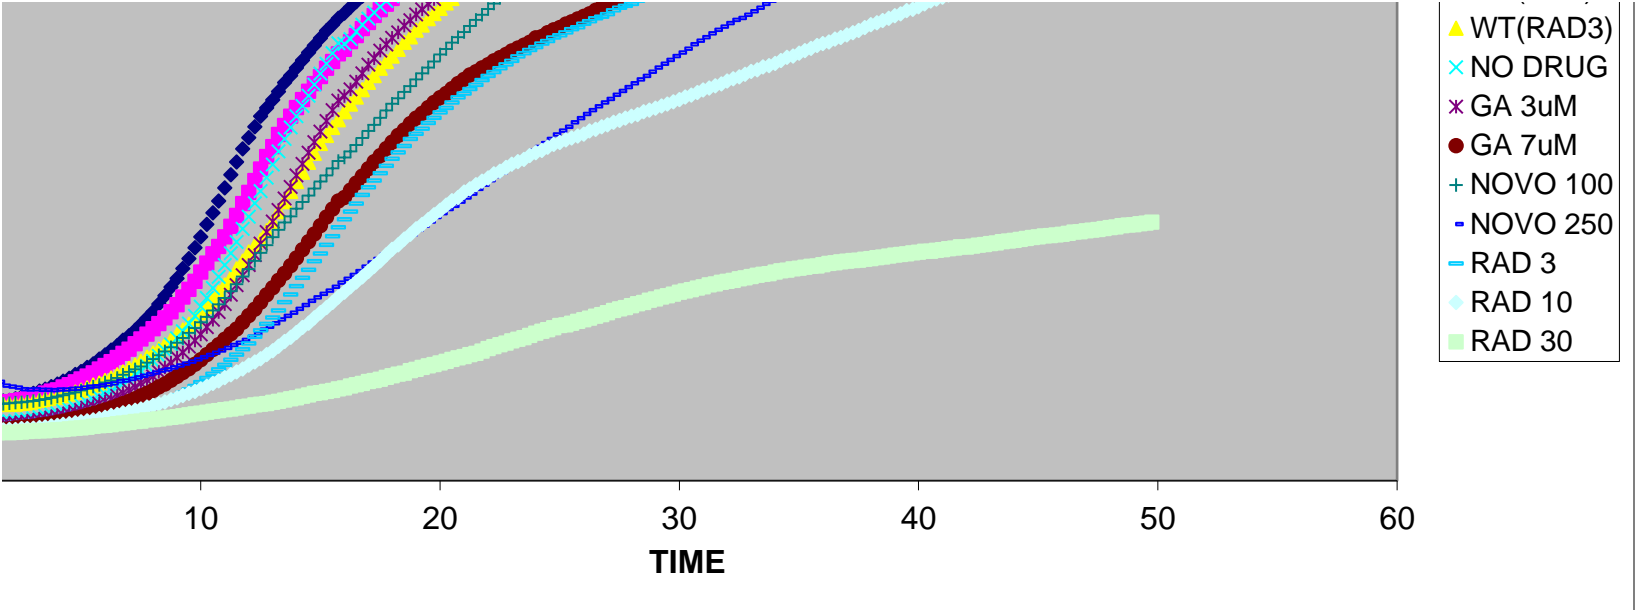

|             | <b>B9</b>      |                 |                  | <b>B10</b>    |               | <b>B11</b>      | <b>B12</b>      | <b>B13</b> |
|-------------|----------------|-----------------|------------------|---------------|---------------|-----------------|-----------------|------------|
| <b>TIME</b> | <b>NO DRUG</b> | <b>WT(GA 3)</b> | <b>WT(RAD 3)</b> | <b>GA 3uM</b> | <b>GA 7uM</b> | <b>NOVO 100</b> | <b>NOVO 250</b> |            |
| 0           | 0.155          | 0.2051          | 0.1892           | 0.1532        | 0.1688        | 0.1994          | 0.2354          |            |
| 0.25        | 0.1457         | 0.1929          | 0.1812           | 0.1445        | 0.1562        | 0.2004          | 0.2324          |            |
| 0.5         | 0.1429         | 0.1912          | 0.1787           | 0.1425        | 0.1524        | 0.2011          | 0.2345          |            |
| 0.75        | 0.1418         | 0.189           | 0.1758           | 0.1405        | 0.1512        | 0.2005          | 0.2372          |            |
| 1           | 0.1423         | 0.1877          | 0.1818           | 0.1406        | 0.1517        | 0.2002          | 0.2403          |            |

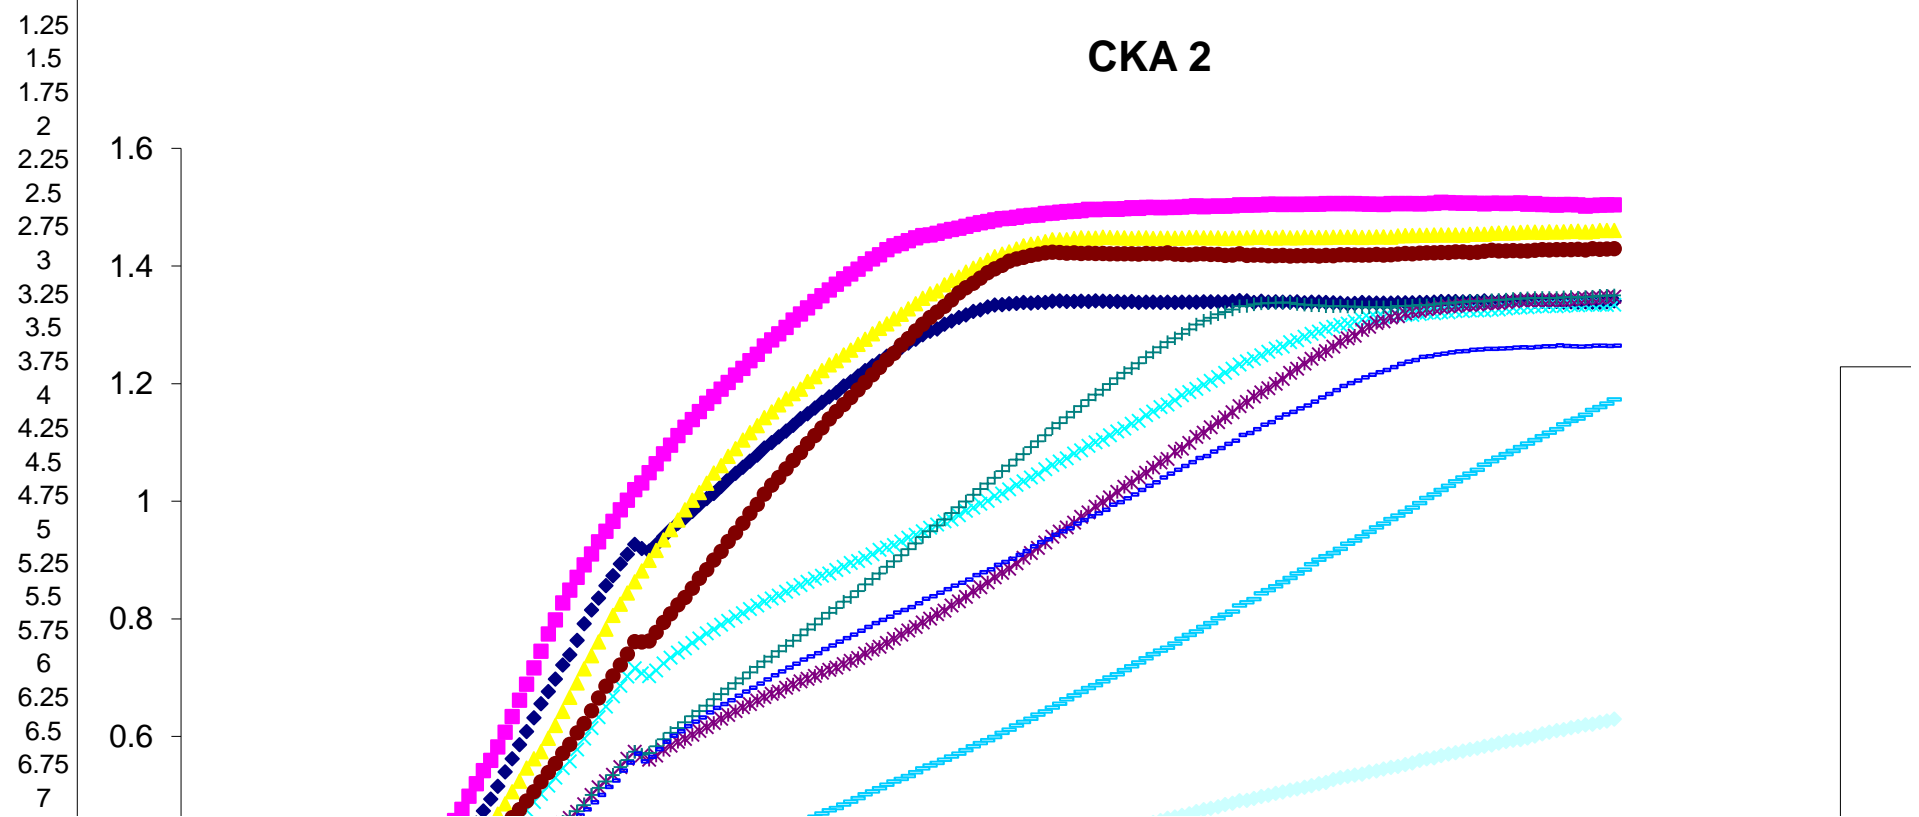

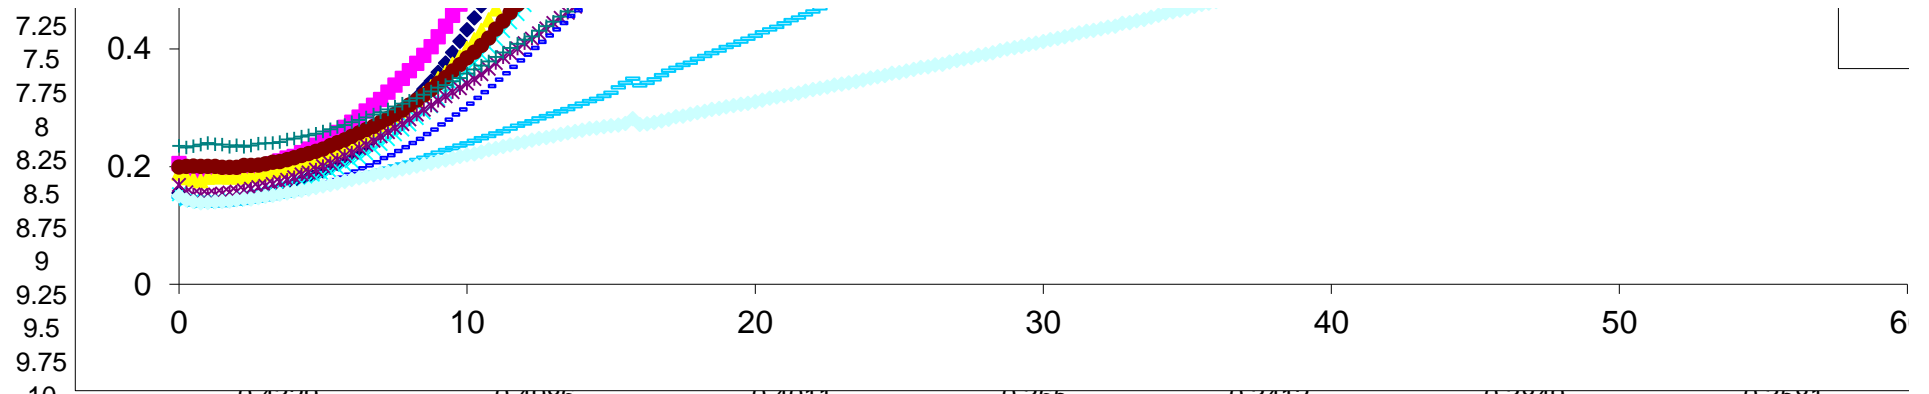

|       |        |        |        |        |        |        |        |
|-------|--------|--------|--------|--------|--------|--------|--------|
| 10    | 0.4329 | 0.4986 | 0.4011 | 0.365  | 0.3412 | 0.3849 | 0.3581 |
| 10.25 | 0.4526 | 0.5197 | 0.416  | 0.3767 | 0.3487 | 0.3946 | 0.365  |
| 10.5  | 0.4734 | 0.5418 | 0.4316 | 0.3902 | 0.3568 | 0.4059 | 0.372  |
| 10.75 | 0.4935 | 0.5593 | 0.4497 | 0.4039 | 0.3663 | 0.4187 | 0.379  |
| 11    | 0.5156 | 0.5825 | 0.4678 | 0.417  | 0.3759 | 0.4338 | 0.3867 |
| 11.25 | 0.54   | 0.6075 | 0.4857 | 0.4305 | 0.386  | 0.4475 | 0.3938 |
| 11.5  | 0.562  | 0.6339 | 0.5059 | 0.4453 | 0.3929 | 0.4622 | 0.4014 |
| 11.75 | 0.5863 | 0.6618 | 0.5242 | 0.4596 | 0.4006 | 0.4758 | 0.4087 |
| 12    | 0.6082 | 0.6889 | 0.5464 | 0.4747 | 0.4096 | 0.4906 | 0.4157 |
| 12.25 | 0.6318 | 0.7168 | 0.5622 | 0.4885 | 0.4176 | 0.5061 | 0.4213 |
| 12.5  | 0.6558 | 0.7448 | 0.5743 | 0.5023 | 0.4265 | 0.5231 | 0.4312 |
| 12.75 | 0.6762 | 0.7744 | 0.5968 | 0.5164 | 0.4349 | 0.5386 | 0.4386 |
| 13    | 0.6977 | 0.7982 | 0.6186 | 0.5303 | 0.4441 | 0.5539 | 0.4465 |
| 13.25 | 0.7213 | 0.8269 | 0.6426 | 0.5463 | 0.4526 | 0.5714 | 0.4548 |
| 13.5  | 0.7391 | 0.849  | 0.6665 | 0.5576 | 0.4615 | 0.5865 | 0.4639 |
| 13.75 | 0.7633 | 0.8707 | 0.6913 | 0.5779 | 0.4718 | 0.606  | 0.4729 |
| 14    | 0.7916 | 0.8918 | 0.7152 | 0.5962 | 0.4847 | 0.6221 | 0.4833 |
| 14.25 | 0.8154 | 0.9106 | 0.7372 | 0.6142 | 0.5008 | 0.644  | 0.5008 |
| 14.5  | 0.8351 | 0.9308 | 0.7608 | 0.6331 | 0.5136 | 0.6655 | 0.5125 |
| 14.75 | 0.8567 | 0.9491 | 0.7825 | 0.6506 | 0.5241 | 0.6858 | 0.5235 |
| 15    | 0.8735 | 0.966  | 0.8057 | 0.6682 | 0.535  | 0.703  | 0.5346 |
| 15.25 | 0.8935 | 0.9853 | 0.8251 | 0.6863 | 0.5482 | 0.7214 | 0.5482 |
| 15.5  | 0.9099 | 1.0015 | 0.8439 | 0.7021 | 0.5622 | 0.74   | 0.5601 |
| 15.75 | 0.9265 | 1.0198 | 0.8628 | 0.716  | 0.5741 | 0.7615 | 0.5739 |
| 16    | 0.9196 | 1.031  | 0.8817 | 0.7076 | 0.5677 | 0.7605 | 0.5692 |
| 16.25 | 0.9155 | 1.0487 | 0.8996 | 0.7027 | 0.5603 | 0.7622 | 0.5718 |
| 16.5  | 0.926  | 1.0637 | 0.9165 | 0.7125 | 0.5675 | 0.777  | 0.5836 |
| 16.75 | 0.9395 | 1.0806 | 0.9342 | 0.7242 | 0.5773 | 0.7937 | 0.5954 |
| 17    | 0.9515 | 1.0952 | 0.9517 | 0.7342 | 0.5846 | 0.8086 | 0.6062 |
| 17.25 | 0.9626 | 1.1114 | 0.9682 | 0.7427 | 0.5909 | 0.8241 | 0.6144 |
| 17.5  | 0.9718 | 1.1256 | 0.9855 | 0.7501 | 0.5959 | 0.8362 | 0.6244 |

|       |        |        |        |        |        |        |        |
|-------|--------|--------|--------|--------|--------|--------|--------|
| 17.75 | 0.9828 | 1.1388 | 1.0016 | 0.7589 | 0.603  | 0.8522 | 0.6346 |
| 18    | 0.9939 | 1.1522 | 1.015  | 0.7665 | 0.6095 | 0.869  | 0.643  |
| 18.25 | 1.0046 | 1.1664 | 1.0307 | 0.7754 | 0.6161 | 0.8839 | 0.6525 |
| 18.5  | 1.0134 | 1.1779 | 1.0478 | 0.7821 | 0.623  | 0.8999 | 0.6632 |
| 18.75 | 1.0253 | 1.1907 | 1.0607 | 0.7901 | 0.63   | 0.9148 | 0.6719 |
| 19    | 1.0371 | 1.2018 | 1.0765 | 0.7966 | 0.6369 | 0.9313 | 0.6812 |
| 19.25 | 1.0474 | 1.2145 | 1.0891 | 0.8036 | 0.6434 | 0.9463 | 0.6906 |
| 19.5  | 1.0577 | 1.2259 | 1.1041 | 0.8098 | 0.6499 | 0.9627 | 0.6986 |
| 19.75 | 1.0683 | 1.239  | 1.1166 | 0.8168 | 0.6553 | 0.9793 | 0.709  |
| 20    | 1.0786 | 1.2497 | 1.1283 | 0.8227 | 0.661  | 0.9947 | 0.7184 |
| 20.25 | 1.0904 | 1.2637 | 1.1419 | 0.8292 | 0.6673 | 1.0119 | 0.7275 |
| 20.5  | 1.0994 | 1.2743 | 1.1521 | 0.8347 | 0.6724 | 1.0275 | 0.7358 |
| 20.75 | 1.1092 | 1.2848 | 1.1637 | 0.8397 | 0.6766 | 1.0401 | 0.7451 |
| 21    | 1.1193 | 1.2956 | 1.1744 | 0.8464 | 0.6829 | 1.0553 | 0.754  |
| 21.25 | 1.1289 | 1.3083 | 1.1829 | 0.8517 | 0.6886 | 1.0691 | 0.7631 |
| 21.5  | 1.1404 | 1.3184 | 1.1906 | 0.8573 | 0.6936 | 1.0827 | 0.7722 |
| 21.75 | 1.1485 | 1.3289 | 1.2037 | 0.8628 | 0.6979 | 1.0978 | 0.7818 |
| 22    | 1.1583 | 1.3395 | 1.2116 | 0.8684 | 0.7029 | 1.1119 | 0.7909 |
| 22.25 | 1.1683 | 1.3493 | 1.2223 | 0.8731 | 0.7086 | 1.1249 | 0.8002 |
| 22.5  | 1.1773 | 1.3589 | 1.2316 | 0.8774 | 0.7136 | 1.14   | 0.8103 |
| 22.75 | 1.1848 | 1.369  | 1.2391 | 0.8832 | 0.7172 | 1.1525 | 0.8186 |
| 23    | 1.1957 | 1.3781 | 1.2485 | 0.8885 | 0.723  | 1.1645 | 0.8291 |
| 23.25 | 1.2033 | 1.3861 | 1.257  | 0.8951 | 0.7288 | 1.1764 | 0.837  |
| 23.5  | 1.2126 | 1.3947 | 1.2667 | 0.8984 | 0.7336 | 1.1893 | 0.8474 |
| 23.75 | 1.2219 | 1.4037 | 1.2752 | 0.9036 | 0.7409 | 1.2021 | 0.8584 |
| 24    | 1.2305 | 1.4119 | 1.2845 | 0.9098 | 0.7477 | 1.2151 | 0.868  |
| 24.25 | 1.2378 | 1.4188 | 1.2937 | 0.9172 | 0.7525 | 1.2273 | 0.877  |
| 24.5  | 1.2463 | 1.4276 | 1.3014 | 0.9214 | 0.7592 | 1.2406 | 0.8884 |
| 24.75 | 1.2533 | 1.4341 | 1.3101 | 0.9258 | 0.7661 | 1.2516 | 0.8979 |
| 25    | 1.261  | 1.4379 | 1.3177 | 0.9317 | 0.7731 | 1.2654 | 0.908  |
| 25.25 | 1.2688 | 1.4431 | 1.3269 | 0.938  | 0.7802 | 1.2763 | 0.9185 |
| 25.5  | 1.2754 | 1.4476 | 1.3358 | 0.9431 | 0.7863 | 1.2896 | 0.9283 |
| 25.75 | 1.283  | 1.4518 | 1.345  | 0.949  | 0.7938 | 1.3009 | 0.9394 |
| 26    | 1.2891 | 1.453  | 1.3526 | 0.9548 | 0.8007 | 1.3122 | 0.9492 |
| 26.25 | 1.2928 | 1.4557 | 1.3577 | 0.9605 | 0.8078 | 1.3215 | 0.959  |
| 26.5  | 1.3011 | 1.4595 | 1.368  | 0.9658 | 0.8143 | 1.3312 | 0.9693 |
| 26.75 | 1.3066 | 1.4619 | 1.3756 | 0.9693 | 0.8227 | 1.3421 | 0.98   |
| 27    | 1.3124 | 1.4639 | 1.3808 | 0.9763 | 0.8298 | 1.3542 | 0.9896 |
| 27.25 | 1.3167 | 1.4677 | 1.3894 | 0.9838 | 0.8372 | 1.3629 | 0.9994 |
| 27.5  | 1.3227 | 1.4709 | 1.396  | 0.9891 | 0.8467 | 1.3707 | 1.0108 |
| 27.75 | 1.3254 | 1.4735 | 1.4025 | 0.9959 | 0.8537 | 1.3793 | 1.0209 |
| 28    | 1.3303 | 1.4758 | 1.4095 | 1.0009 | 0.8618 | 1.3884 | 1.0299 |

|       |        |        |        |        |        |        |        |
|-------|--------|--------|--------|--------|--------|--------|--------|
| 28.25 | 1.3337 | 1.4784 | 1.4156 | 1.0087 | 0.8704 | 1.3952 | 1.0397 |
| 28.5  | 1.3339 | 1.4806 | 1.4201 | 1.0133 | 0.8782 | 1.4008 | 1.0515 |
| 28.75 | 1.3356 | 1.4813 | 1.4239 | 1.02   | 0.8851 | 1.4083 | 1.0604 |
| 29    | 1.3363 | 1.4829 | 1.4289 | 1.0277 | 0.8947 | 1.4117 | 1.071  |
| 29.25 | 1.3378 | 1.485  | 1.4341 | 1.034  | 0.9039 | 1.4146 | 1.08   |
| 29.5  | 1.3371 | 1.4861 | 1.4367 | 1.0401 | 0.9117 | 1.418  | 1.0919 |
| 29.75 | 1.3378 | 1.4866 | 1.4387 | 1.046  | 0.9207 | 1.42   | 1.1018 |
| 30    | 1.3381 | 1.4892 | 1.4412 | 1.0546 | 0.9298 | 1.4224 | 1.1122 |
| 30.25 | 1.3399 | 1.49   | 1.4444 | 1.0615 | 0.9398 | 1.4233 | 1.1239 |
| 30.5  | 1.3404 | 1.4913 | 1.4444 | 1.0673 | 0.9483 | 1.423  | 1.1328 |
| 30.75 | 1.3397 | 1.4923 | 1.4446 | 1.0731 | 0.9557 | 1.4218 | 1.1426 |
| 31    | 1.3398 | 1.4929 | 1.4466 | 1.0812 | 0.9636 | 1.4221 | 1.1521 |
| 31.25 | 1.3403 | 1.4939 | 1.448  | 1.0866 | 0.9732 | 1.4212 | 1.1619 |
| 31.5  | 1.3396 | 1.496  | 1.4475 | 1.0941 | 0.9812 | 1.422  | 1.1719 |
| 31.75 | 1.3404 | 1.4956 | 1.4475 | 1.1001 | 0.9908 | 1.4211 | 1.1815 |
| 32    | 1.34   | 1.4964 | 1.4488 | 1.1045 | 0.9985 | 1.4214 | 1.1895 |
| 32.25 | 1.3397 | 1.4969 | 1.4483 | 1.1121 | 1.0067 | 1.4207 | 1.1991 |
| 32.5  | 1.3395 | 1.4964 | 1.448  | 1.1186 | 1.0157 | 1.4205 | 1.2089 |
| 32.75 | 1.3387 | 1.4974 | 1.448  | 1.1237 | 1.0245 | 1.4208 | 1.218  |
| 33    | 1.3394 | 1.4992 | 1.4467 | 1.1318 | 1.0317 | 1.4205 | 1.2257 |
| 33.25 | 1.3377 | 1.498  | 1.4476 | 1.1367 | 1.0407 | 1.4202 | 1.2346 |
| 33.5  | 1.3383 | 1.4993 | 1.4481 | 1.1463 | 1.0484 | 1.4211 | 1.2448 |
| 33.75 | 1.3385 | 1.4994 | 1.4469 | 1.1525 | 1.0575 | 1.4204 | 1.2532 |
| 34    | 1.338  | 1.4988 | 1.4474 | 1.16   | 1.0659 | 1.4204 | 1.2616 |
| 34.25 | 1.3386 | 1.4995 | 1.4471 | 1.1646 | 1.072  | 1.4221 | 1.2703 |
| 34.5  | 1.3378 | 1.4996 | 1.4474 | 1.1716 | 1.0843 | 1.42   | 1.2769 |
| 34.75 | 1.3386 | 1.5003 | 1.4472 | 1.1804 | 1.0895 | 1.4198 | 1.2849 |
| 35    | 1.3383 | 1.5014 | 1.4486 | 1.1855 | 1.0989 | 1.4191 | 1.2923 |
| 35.25 | 1.3383 | 1.502  | 1.4486 | 1.1909 | 1.1092 | 1.4199 | 1.3006 |
| 35.5  | 1.3393 | 1.5004 | 1.4477 | 1.1982 | 1.1164 | 1.4204 | 1.3071 |
| 35.75 | 1.3393 | 1.5019 | 1.4479 | 1.2045 | 1.1256 | 1.4196 | 1.3116 |
| 36    | 1.3389 | 1.5018 | 1.4476 | 1.2114 | 1.1343 | 1.4195 | 1.3179 |
| 36.25 | 1.3387 | 1.5015 | 1.4469 | 1.2185 | 1.1425 | 1.4181 | 1.3219 |
| 36.5  | 1.3397 | 1.5021 | 1.4473 | 1.2252 | 1.1512 | 1.4185 | 1.3259 |
| 36.75 | 1.341  | 1.5037 | 1.4481 | 1.2325 | 1.1619 | 1.4205 | 1.3315 |
| 37    | 1.3405 | 1.5034 | 1.4477 | 1.2376 | 1.1685 | 1.4177 | 1.332  |
| 37.25 | 1.3377 | 1.504  | 1.449  | 1.2421 | 1.1778 | 1.4182 | 1.3347 |
| 37.5  | 1.3403 | 1.5037 | 1.4489 | 1.2482 | 1.1851 | 1.4184 | 1.3364 |
| 37.75 | 1.3387 | 1.505  | 1.4486 | 1.2543 | 1.1922 | 1.4174 | 1.3367 |
| 38    | 1.339  | 1.5047 | 1.4475 | 1.2594 | 1.1995 | 1.4175 | 1.3374 |
| 38.25 | 1.3385 | 1.5046 | 1.449  | 1.2631 | 1.2079 | 1.418  | 1.3378 |
| 38.5  | 1.3383 | 1.505  | 1.4481 | 1.2703 | 1.2181 | 1.417  | 1.3372 |



|       |        |        |        |        |        |        |        |
|-------|--------|--------|--------|--------|--------|--------|--------|
| 38.75 | 1.3388 | 1.5042 | 1.448  | 1.2737 | 1.2255 | 1.4175 | 1.3352 |
| 39    | 1.3376 | 1.505  | 1.4488 | 1.2799 | 1.2339 | 1.4173 | 1.3344 |
| 39.25 | 1.3385 | 1.5049 | 1.4482 | 1.2845 | 1.2423 | 1.4177 | 1.3331 |
| 39.5  | 1.3385 | 1.5052 | 1.4485 | 1.2884 | 1.2499 | 1.4167 | 1.333  |
| 39.75 | 1.3378 | 1.506  | 1.4484 | 1.2935 | 1.2553 | 1.4178 | 1.3313 |
| 40    | 1.3373 | 1.5062 | 1.4489 | 1.2965 | 1.2628 | 1.4175 | 1.3314 |
| 40.25 | 1.3371 | 1.5063 | 1.4496 | 1.2998 | 1.2711 | 1.4191 | 1.3319 |
| 40.5  | 1.3359 | 1.506  | 1.4489 | 1.3021 | 1.2772 | 1.419  | 1.3307 |
| 40.75 | 1.3362 | 1.5059 | 1.4494 | 1.3056 | 1.2815 | 1.4183 | 1.3309 |
| 41    | 1.3381 | 1.5053 | 1.4485 | 1.3084 | 1.2911 | 1.4184 | 1.3296 |
| 41.25 | 1.3372 | 1.5048 | 1.4491 | 1.3107 | 1.2964 | 1.4184 | 1.3299 |
| 41.5  | 1.3366 | 1.5052 | 1.4495 | 1.3112 | 1.3034 | 1.4193 | 1.33   |
| 41.75 | 1.3369 | 1.5045 | 1.4496 | 1.3129 | 1.3056 | 1.4187 | 1.3297 |
| 42    | 1.3367 | 1.506  | 1.4492 | 1.3136 | 1.3123 | 1.4191 | 1.3295 |
| 42.25 | 1.3375 | 1.506  | 1.4512 | 1.3156 | 1.3147 | 1.42   | 1.3317 |
| 42.5  | 1.3373 | 1.5062 | 1.4516 | 1.317  | 1.3194 | 1.421  | 1.3318 |
| 42.75 | 1.3373 | 1.506  | 1.4518 | 1.3169 | 1.3225 | 1.4204 | 1.3325 |
| 43    | 1.3381 | 1.5053 | 1.4522 | 1.3185 | 1.3238 | 1.4217 | 1.3335 |
| 43.25 | 1.3381 | 1.5059 | 1.4522 | 1.3203 | 1.3267 | 1.4222 | 1.3332 |
| 43.5  | 1.3384 | 1.5064 | 1.4527 | 1.3195 | 1.328  | 1.4224 | 1.3349 |
| 43.75 | 1.3394 | 1.5084 | 1.453  | 1.3211 | 1.3299 | 1.4226 | 1.3364 |
| 44    | 1.3397 | 1.5078 | 1.4529 | 1.3211 | 1.3313 | 1.4228 | 1.3363 |
| 44.25 | 1.3394 | 1.5073 | 1.4529 | 1.3232 | 1.3318 | 1.424  | 1.3378 |
| 44.5  | 1.3389 | 1.5065 | 1.4523 | 1.323  | 1.3339 | 1.4238 | 1.3385 |
| 44.75 | 1.3397 | 1.5065 | 1.454  | 1.3242 | 1.3338 | 1.4227 | 1.3402 |
| 45    | 1.3397 | 1.5064 | 1.4543 | 1.3241 | 1.3347 | 1.4234 | 1.34   |
| 45.25 | 1.3404 | 1.5057 | 1.4541 | 1.3245 | 1.3361 | 1.425  | 1.3396 |
| 45.5  | 1.3397 | 1.5065 | 1.4557 | 1.3257 | 1.337  | 1.4264 | 1.3419 |
| 45.75 | 1.3398 | 1.5067 | 1.4559 | 1.3261 | 1.3367 | 1.4253 | 1.3423 |
| 46    | 1.3407 | 1.5061 | 1.4561 | 1.3275 | 1.3384 | 1.4253 | 1.343  |
| 46.25 | 1.3403 | 1.5064 | 1.456  | 1.3285 | 1.3401 | 1.4262 | 1.3437 |
| 46.5  | 1.341  | 1.5069 | 1.4571 | 1.329  | 1.3415 | 1.4255 | 1.3443 |
| 46.75 | 1.3409 | 1.5052 | 1.4577 | 1.3297 | 1.3415 | 1.4256 | 1.345  |
| 47    | 1.3402 | 1.5059 | 1.4574 | 1.3308 | 1.3415 | 1.4264 | 1.3455 |
| 47.25 | 1.3403 | 1.5042 | 1.4571 | 1.3312 | 1.3415 | 1.4275 | 1.3458 |
| 47.5  | 1.3398 | 1.5044 | 1.4583 | 1.332  | 1.3418 | 1.4271 | 1.3454 |
| 47.75 | 1.3395 | 1.5036 | 1.4575 | 1.3313 | 1.3424 | 1.4277 | 1.3456 |
| 48    | 1.3386 | 1.5046 | 1.4582 | 1.3322 | 1.3419 | 1.4275 | 1.3468 |
| 48.25 | 1.3391 | 1.5042 | 1.4587 | 1.3336 | 1.3429 | 1.4275 | 1.347  |
| 48.5  | 1.3385 | 1.504  | 1.4592 | 1.3331 | 1.3437 | 1.4285 | 1.3462 |
| 48.75 | 1.339  | 1.5019 | 1.4578 | 1.3338 | 1.3444 | 1.4273 | 1.3474 |
| 49    | 1.3386 | 1.5026 | 1.4586 | 1.3339 | 1.3454 | 1.4293 | 1.3477 |

|       |        |        |        |        |        |        |        |
|-------|--------|--------|--------|--------|--------|--------|--------|
| 49.25 | 1.3386 | 1.5034 | 1.4604 | 1.3342 | 1.3458 | 1.428  | 1.3492 |
| 49.5  | 1.3389 | 1.504  | 1.4603 | 1.3337 | 1.3472 | 1.4286 | 1.3495 |
| 49.75 | 1.3404 | 1.5038 | 1.4602 | 1.3344 | 1.3478 | 1.4293 | 1.3499 |

| B14          | B15           | B16           |
|--------------|---------------|---------------|
| <b>RAD 3</b> | <b>RAD 10</b> | <b>RAD 30</b> |
| 0.1479       | 0.1486        | 0.1505        |
| 0.1395       | 0.1383        | 0.1433        |
| 0.1371       | 0.1354        | 0.1403        |
| 0.1349       | 0.1341        | 0.1383        |
| 0.1349       | 0.1336        | 0.1389        |
|              | 0.1342        | 0.1398        |
|              | 0.1348        | 0.1406        |
|              | 0.1356        | 0.1413        |
|              | 0.1374        | 0.1435        |
|              | 0.1382        | 0.145         |
|              | 0.1406        | 0.1451        |
|              | 0.142         | 0.1471        |
|              | 0.1442        | 0.1491        |
|              | 0.1465        | 0.1506        |
|              | 0.1487        | 0.1529        |
|              | 0.1509        | 0.1554        |
|              | 0.1537        | 0.1576        |
|              | 0.1562        | 0.1596        |
|              | 0.1595        | 0.1618        |
|              | 0.1631        | 0.1644        |
|              | 0.1651        | 0.1671        |
|              | 0.1686        | 0.1694        |
|              | 0.1716        | 0.1722        |
|              | 0.1756        | 0.1749        |
|              | 0.1787        | 0.1781        |
|              | 0.1824        | 0.1808        |
|              | 0.186         | 0.1831        |
|              | 0.1893        | 0.1864        |
|              | 0.1928        | 0.1892        |

◆ NO DRUG

■ WT(GA 3)

▲ WT(RAD 3)

× GA 3uM

× GA 7uM

● NOVO 100

+ NOVO 250

- RAD 3

- RAD 10

◀ RAD 30

0

|        |        |        |
|--------|--------|--------|
|        | 0.1963 | 0.1898 |
|        | 0.2001 | 0.1929 |
|        | 0.2035 | 0.1958 |
|        | 0.2071 | 0.1981 |
|        | 0.2115 | 0.2008 |
|        | 0.2153 | 0.2037 |
|        | 0.2192 | 0.2059 |
|        | 0.2237 | 0.2093 |
|        | 0.228  | 0.2115 |
|        | 0.2313 | 0.2142 |
|        | 0.2356 | 0.2171 |
|        | 0.2394 | 0.2197 |
| 0.307  | 0.2437 | 0.2217 |
| 0.3169 | 0.2481 | 0.2249 |
| 0.3267 | 0.252  | 0.2286 |
| 0.3369 | 0.2564 | 0.2311 |
| 0.3479 | 0.26   | 0.2339 |
| 0.3586 | 0.2645 | 0.2368 |
| 0.3695 | 0.2692 | 0.2398 |
| 0.3802 | 0.2732 | 0.2417 |
| 0.3905 | 0.2769 | 0.2452 |
| 0.4014 | 0.2819 | 0.2475 |
| 0.4119 | 0.2856 | 0.2495 |
| 0.4227 | 0.2902 | 0.2522 |
| 0.433  | 0.294  | 0.2546 |
| 0.4442 | 0.2979 | 0.2576 |
| 0.4558 | 0.3025 | 0.2599 |
| 0.4661 | 0.3071 | 0.2619 |
| 0.4763 | 0.3113 | 0.2648 |
| 0.4882 | 0.3152 | 0.2657 |
| 0.5006 | 0.3199 | 0.2677 |
| 0.5142 | 0.3254 | 0.2693 |
| 0.5254 | 0.3345 | 0.2704 |
| 0.542  | 0.3422 | 0.2731 |
| 0.5555 | 0.3495 | 0.2815 |
| 0.5709 | 0.3378 | 0.2714 |
| 0.558  | 0.3422 | 0.2728 |
| 0.5653 | 0.3486 | 0.2748 |
| 0.5786 | 0.3554 | 0.2774 |
| 0.5911 | 0.3628 | 0.2805 |
| 0.6011 | 0.3677 | 0.2847 |
| 0.6091 | 0.3728 | 0.286  |
| 0.6174 |        |        |

|        |        |        |
|--------|--------|--------|
| 0.6251 | 0.3767 | 0.289  |
| 0.6324 | 0.383  | 0.2919 |
| 0.6413 | 0.3882 | 0.294  |
| 0.6484 | 0.3932 | 0.2971 |
| 0.6551 | 0.3974 | 0.299  |
| 0.6619 | 0.4031 | 0.3015 |
| 0.6693 | 0.4072 | 0.3039 |
| 0.6763 | 0.4125 | 0.3058 |
| 0.6827 | 0.4175 | 0.3078 |
| 0.6901 | 0.4226 | 0.3105 |
| 0.6969 | 0.4281 | 0.3132 |
| 0.7043 | 0.4334 | 0.3164 |
| 0.7106 | 0.4378 | 0.3183 |
| 0.7171 | 0.4434 | 0.3204 |
| 0.724  | 0.4489 | 0.3228 |
| 0.7306 | 0.4535 | 0.3251 |
| 0.7361 | 0.4588 | 0.3282 |
| 0.7419 | 0.4636 | 0.3307 |
| 0.7488 | 0.469  | 0.3329 |
| 0.7545 | 0.4746 | 0.3354 |
| 0.7614 | 0.4783 | 0.3383 |
| 0.7675 | 0.4844 | 0.3401 |
| 0.7735 | 0.4892 | 0.3424 |
| 0.78   | 0.4951 | 0.3448 |
| 0.7864 | 0.5015 | 0.3473 |
| 0.7927 | 0.5067 | 0.3505 |
| 0.7982 | 0.5119 | 0.3528 |
| 0.8039 | 0.5182 | 0.355  |
| 0.8108 | 0.5233 | 0.3585 |
| 0.8152 | 0.5281 | 0.3597 |
| 0.8199 | 0.5329 | 0.3626 |
| 0.8267 | 0.5393 | 0.3651 |
| 0.8343 | 0.5456 | 0.3683 |
| 0.8387 | 0.551  | 0.3697 |
| 0.8444 | 0.5551 | 0.3729 |
| 0.8505 | 0.5605 | 0.3741 |
| 0.8566 | 0.5659 | 0.3775 |
| 0.8616 | 0.5711 | 0.3804 |
| 0.867  | 0.5771 | 0.3832 |
| 0.8747 | 0.5834 | 0.3856 |
| 0.8791 | 0.5889 | 0.389  |
| 0.8843 | 0.5936 | 0.3908 |

|        |        |        |
|--------|--------|--------|
| 0.8918 | 0.5993 | 0.3937 |
| 0.8968 | 0.6064 | 0.3971 |
| 0.9022 | 0.6117 | 0.3998 |
| 0.9087 | 0.6188 | 0.402  |
| 0.9155 | 0.6245 | 0.4046 |
| 0.9232 | 0.6304 | 0.4074 |
| 0.9303 | 0.6372 | 0.4097 |
| 0.9354 | 0.6426 | 0.4126 |
| 0.943  | 0.6491 | 0.4158 |
| 0.9489 | 0.6558 | 0.4179 |
| 0.9538 | 0.6633 | 0.4205 |
| 0.9622 | 0.6698 | 0.4237 |
| 0.968  | 0.6756 | 0.427  |
| 0.9748 | 0.6826 | 0.4297 |
| 0.9797 | 0.6873 | 0.4314 |
| 0.9855 | 0.6937 | 0.4341 |
| 0.9939 | 0.7005 | 0.4371 |
| 0.9983 | 0.706  | 0.4384 |
| 1.0048 | 0.7126 | 0.4434 |
| 1.0113 | 0.7194 | 0.4444 |
| 1.019  | 0.7258 | 0.4479 |
| 1.026  | 0.7329 | 0.4503 |
| 1.0323 | 0.74   | 0.454  |
| 1.0405 | 0.7462 | 0.4569 |
| 1.0471 | 0.751  | 0.4607 |
| 1.0536 | 0.7582 | 0.4631 |
| 1.0597 | 0.7662 | 0.466  |
| 1.0664 | 0.7727 | 0.4687 |
| 1.0736 | 0.7788 | 0.4724 |
| 1.077  | 0.7864 | 0.4754 |
| 1.0842 | 0.7926 | 0.4777 |
| 1.0903 | 0.8009 | 0.4804 |
| 1.0973 | 0.8068 | 0.4841 |
| 1.1027 | 0.8126 | 0.4867 |
| 1.1128 | 0.8228 | 0.4908 |
| 1.1161 | 0.8284 | 0.4914 |
| 1.1225 | 0.8336 | 0.4946 |
| 1.13   | 0.8434 | 0.4977 |
| 1.1344 | 0.8491 | 0.5002 |
| 1.1419 | 0.8556 | 0.5034 |
| 1.1478 | 0.8622 | 0.5057 |
| 1.1521 | 0.8693 | 0.5089 |

|        |        |        |
|--------|--------|--------|
| 1.1579 | 0.8769 | 0.5109 |
| 1.1626 | 0.8839 | 0.5138 |
| 1.1693 | 0.8927 | 0.5165 |
| 1.1765 | 0.9004 | 0.5197 |
| 1.1824 | 0.9063 | 0.5221 |
| 1.1888 | 0.9121 | 0.5267 |
| 1.1957 | 0.9192 | 0.5298 |
| 1.2006 | 0.9275 | 0.5323 |
| 1.2051 | 0.9334 | 0.5343 |
| 1.2106 | 0.94   | 0.5363 |
| 1.2152 | 0.948  | 0.5397 |
| 1.2194 | 0.9553 | 0.5415 |
| 1.223  | 0.9619 | 0.5449 |
| 1.228  | 0.9694 | 0.5472 |
| 1.2334 | 0.9756 | 0.5493 |
| 1.2372 | 0.9821 | 0.5521 |
| 1.2402 | 0.9891 | 0.5551 |
| 1.2454 | 0.997  | 0.5592 |
| 1.2464 | 1.0054 | 0.5622 |
| 1.2494 | 1.0114 | 0.5636 |
| 1.251  | 1.0191 | 0.5678 |
| 1.253  | 1.0264 | 0.5704 |
| 1.2548 | 1.0339 | 0.5724 |
| 1.2555 | 1.0403 | 0.5751 |
| 1.2573 | 1.0471 | 0.5781 |
| 1.258  | 1.0535 | 0.5801 |
| 1.2591 | 1.0619 | 0.5834 |
| 1.2593 | 1.0679 | 0.5857 |
| 1.2595 | 1.074  | 0.5889 |
| 1.2603 | 1.0799 | 0.5913 |
| 1.2615 | 1.0855 | 0.5936 |
| 1.2616 | 1.0921 | 0.5949 |
| 1.261  | 1.098  | 0.5976 |
| 1.2624 | 1.1039 | 0.601  |
| 1.2633 | 1.1104 | 0.6044 |
| 1.2634 | 1.1166 | 0.6071 |
| 1.2649 | 1.1227 | 0.6099 |
| 1.2637 | 1.1309 | 0.6116 |
| 1.2632 | 1.1366 | 0.615  |
| 1.2629 | 1.1406 | 0.617  |
| 1.2634 | 1.147  | 0.62   |
| 1.2643 | 1.1553 | 0.6207 |

|        |        |        |
|--------|--------|--------|
| 1.2643 | 1.1599 | 0.624  |
| 1.2641 | 1.1662 | 0.6266 |
| 1.2645 | 1.1731 | 0.6297 |



COG 6

|      |        |          |            | K1      | K2     | K3     | K4       | K5       |
|------|--------|----------|------------|---------|--------|--------|----------|----------|
| TIME | WT     | WT(GA 3) | WT (RAD 3) | NO DRUG | GA 3uM | GA 7uM | NOVO 100 | NOVO 250 |
| 0    | 0.1894 | 0.2051   | 0.1892     | 0.1698  | 0.1611 | 0.1536 | 0.2107   | 0.2621   |
| 0.25 | 0.1844 | 0.1929   | 0.1812     | 0.1617  | 0.1477 | 0.1474 | 0.2158   | 0.2638   |
| 0.5  | 0.1833 | 0.1912   | 0.1787     | 0.1592  | 0.1458 | 0.1447 | 0.2152   | 0.2665   |
| 0.75 | 0.1838 | 0.189    | 0.1758     | 0.1575  | 0.1451 | 0.145  | 0.2123   | 0.2683   |
| 1    | 0.1843 | 0.1877   | 0.1818     | 0.1583  | 0.1453 | 0.144  | 0.2121   | 0.2695   |
| 1.25 | 0.1867 | 0.1862   | 0.1836     | 0.158   | 0.1451 | 0.1446 | 0.2134   | 0.271    |
| 1.5  | 0.189  | 0.189    | 0.189      | 0.1594  | 0.1449 | 0.145  | 0.2144   | 0.2704   |

COG 6

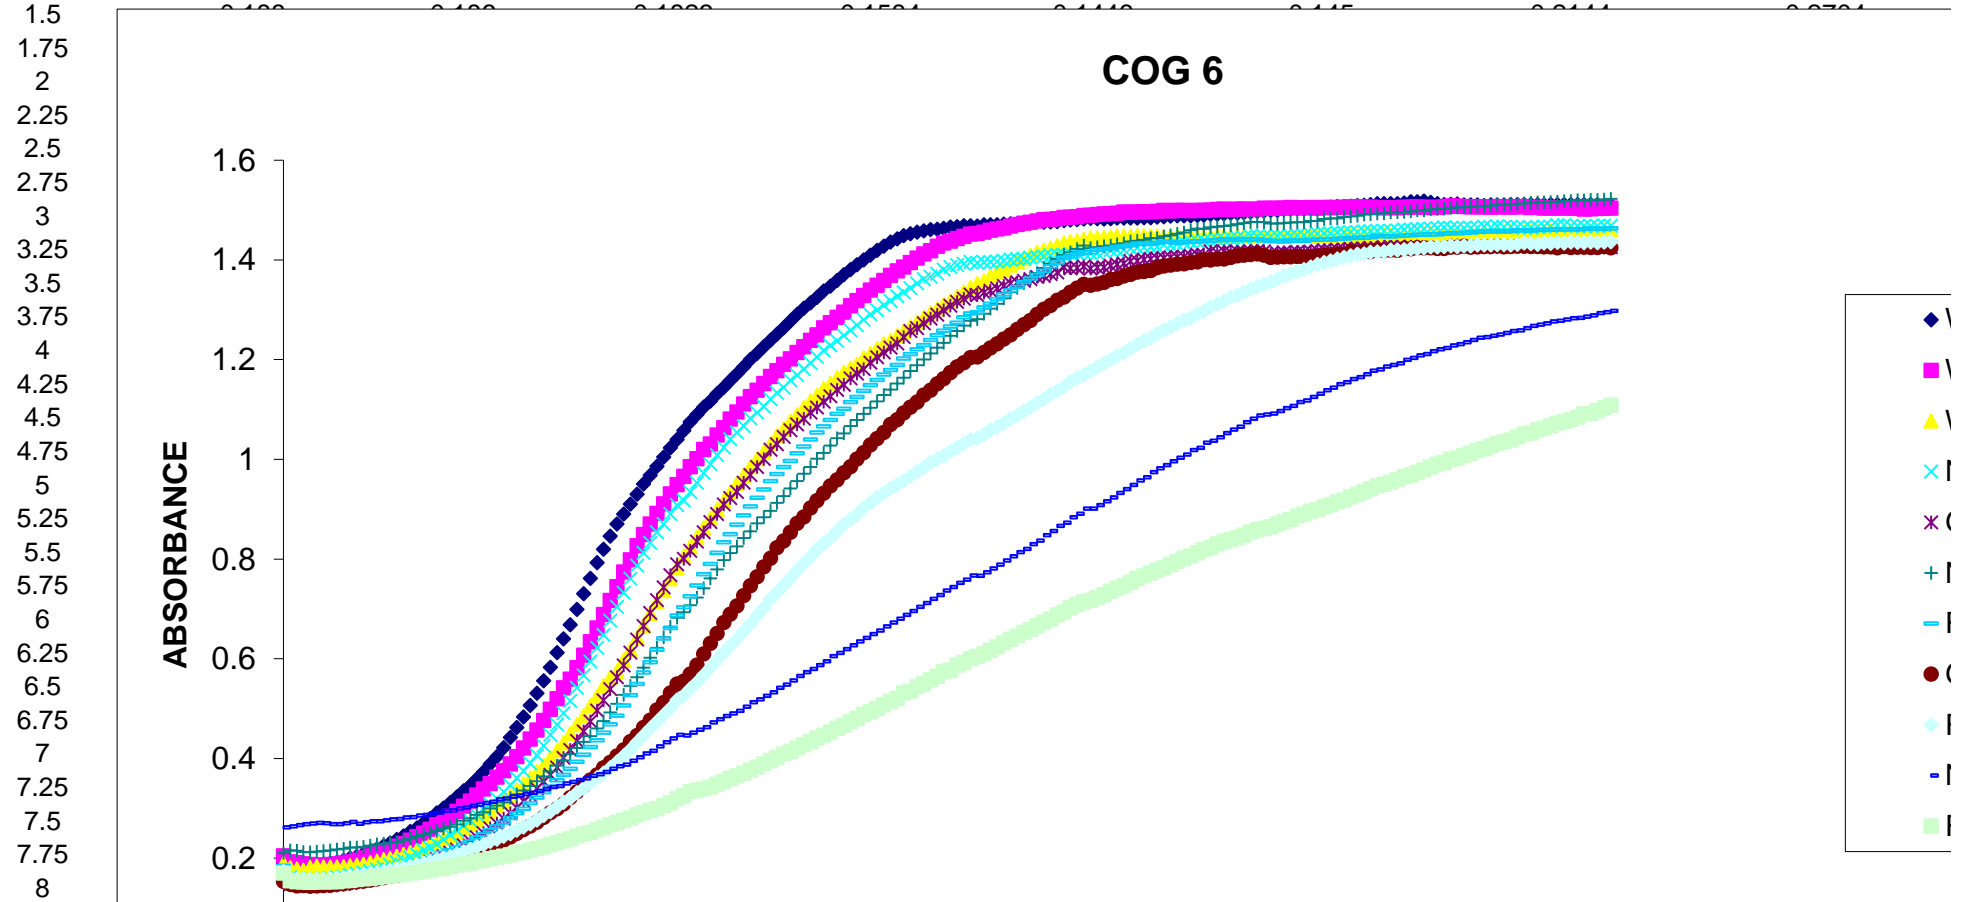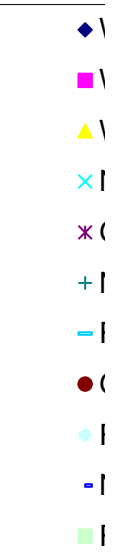

|       | TIME   |        |        |        |        |        |        |        |
|-------|--------|--------|--------|--------|--------|--------|--------|--------|
|       | 0      | 10     | 20     | 30     | 40     | 50     | 60     |        |
| 8.25  |        |        |        |        |        |        |        |        |
| 8.5   |        |        |        |        |        |        |        |        |
| 8.75  |        |        |        |        |        |        |        |        |
| 9     |        |        |        |        |        |        |        |        |
| 9.25  |        |        |        |        |        |        |        |        |
| 9.5   |        |        |        |        |        |        |        |        |
| 9.75  | 0.5829 | 0.4986 | 0.4011 | 0.4476 | 0.3672 | 0.2915 | 0.3743 | 0.3428 |
| 10    | 0.6122 | 0.5197 | 0.416  | 0.4678 | 0.3822 | 0.299  | 0.3855 | 0.345  |
| 10.25 | 0.6397 | 0.5418 | 0.4316 | 0.4912 | 0.4013 | 0.3085 | 0.3959 | 0.3497 |
| 10.5  | 0.6685 | 0.5593 | 0.4497 | 0.5154 | 0.417  | 0.3218 | 0.409  | 0.353  |
| 11    | 0.6992 | 0.5825 | 0.4678 | 0.5415 | 0.4353 | 0.3333 | 0.4212 | 0.3567 |
| 11.25 | 0.7307 | 0.6075 | 0.4857 | 0.5668 | 0.4548 | 0.3452 | 0.4334 | 0.3603 |
| 11.5  | 0.7614 | 0.6339 | 0.5059 | 0.5945 | 0.4742 | 0.3569 | 0.445  | 0.3653 |
| 11.75 | 0.7927 | 0.6618 | 0.5242 | 0.6219 | 0.4963 | 0.367  | 0.4601 | 0.3687 |
| 12    | 0.8194 | 0.6889 | 0.5464 | 0.6475 | 0.5168 | 0.3813 | 0.4751 | 0.3727 |
| 12.25 | 0.8459 | 0.7168 | 0.5622 | 0.6763 | 0.5389 | 0.3923 | 0.4921 | 0.3791 |
| 12.5  | 0.8706 | 0.7448 | 0.5743 | 0.7043 | 0.5628 | 0.405  | 0.5098 | 0.3843 |
| 12.75 | 0.8904 | 0.7744 | 0.5968 | 0.7323 | 0.5864 | 0.4172 | 0.5274 | 0.3879 |
| 13    | 0.9099 | 0.7982 | 0.6186 | 0.7605 | 0.6121 | 0.4337 | 0.5454 | 0.3953 |
| 13.25 | 0.9301 | 0.8269 | 0.6426 | 0.7872 | 0.6386 | 0.4462 | 0.563  | 0.4024 |
| 13.5  | 0.9508 | 0.849  | 0.6665 | 0.8128 | 0.6658 | 0.462  | 0.5821 | 0.4102 |
| 13.75 | 0.9679 | 0.8707 | 0.6913 | 0.8327 | 0.6917 | 0.4769 | 0.6023 | 0.4156 |
| 14    | 0.986  | 0.8918 | 0.7152 | 0.8538 | 0.7178 | 0.4972 | 0.6221 | 0.4245 |
| 14.25 | 1.0047 | 0.9106 | 0.7372 | 0.8706 | 0.7435 | 0.5122 | 0.6432 | 0.4329 |
| 14.5  | 1.0233 | 0.9308 | 0.7608 | 0.8901 | 0.7676 | 0.5318 | 0.6643 | 0.4403 |
| 14.75 | 1.0397 | 0.9491 | 0.7825 | 0.9084 | 0.7897 | 0.5497 | 0.6824 | 0.4472 |
| 15    | 1.0577 | 0.966  | 0.8057 | 0.9171 | 0.8002 | 0.5551 | 0.6933 | 0.4459 |
| 15.25 | 1.0753 | 0.9853 | 0.8251 | 0.9343 | 0.8164 | 0.5694 | 0.7071 | 0.4517 |
| 15.5  | 1.0897 | 1.0015 | 0.8439 | 0.953  | 0.8348 | 0.5876 | 0.7229 | 0.4579 |
| 15.75 | 1.1049 | 1.0198 | 0.8628 | 0.9726 | 0.8539 | 0.6099 | 0.7417 | 0.463  |
| 16    | 1.1171 | 1.031  | 0.8817 | 0.9905 | 0.8744 | 0.6313 | 0.7614 | 0.4723 |
| 16.25 | 1.1316 | 1.0487 | 0.8996 | 1.0081 | 0.8904 | 0.651  | 0.779  | 0.479  |
| 16.5  | 1.1443 | 1.0637 | 0.9165 | 1.0237 | 0.9095 | 0.6724 | 0.7976 | 0.4856 |
| 16.75 | 1.1579 | 1.0806 | 0.9342 | 1.0405 | 0.9222 | 0.6896 | 0.8119 | 0.4904 |
| 17    | 1.1715 | 1.0952 | 0.9517 | 1.0539 | 0.9345 | 0.7063 | 0.8255 | 0.4958 |
| 17.25 | 1.1858 | 1.1114 | 0.9682 | 1.067  | 0.953  | 0.7264 | 0.8421 | 0.5036 |
| 17.5  | 1.2004 | 1.1256 | 0.9855 | 1.0825 | 0.9686 | 0.7463 | 0.8556 | 0.5129 |
| 17.75 | 1.2123 | 1.1388 | 1.0016 | 1.0938 | 0.9849 | 0.7648 | 0.8717 | 0.5188 |
| 18    | 1.2261 | 1.1522 | 1.015  | 1.1061 | 1.0004 | 0.7847 | 0.8841 | 0.5256 |
| 18.25 | 1.239  | 1.1664 | 1.0307 | 1.121  | 1.0196 | 0.8014 | 0.8966 | 0.5326 |
| 18.5  | 1.251  | 1.1779 | 1.0478 | 1.1338 | 1.0305 | 0.8226 | 0.913  | 0.5417 |

|       |        |        |        |        |        |        |        |        |
|-------|--------|--------|--------|--------|--------|--------|--------|--------|
| 18.75 | 1.2641 | 1.1907 | 1.0607 | 1.1436 | 1.0448 | 0.8363 | 0.9265 | 0.5484 |
| 19    | 1.2773 | 1.2018 | 1.0765 | 1.1588 | 1.0584 | 0.8537 | 0.9415 | 0.5568 |
| 19.25 | 1.2907 | 1.2145 | 1.0891 | 1.1686 | 1.0703 | 0.8718 | 0.9561 | 0.5655 |
| 19.5  | 1.3032 | 1.2259 | 1.1041 | 1.1811 | 1.0815 | 0.8847 | 0.9711 | 0.573  |
| 19.75 | 1.3141 | 1.239  | 1.1166 | 1.1934 | 1.094  | 0.9024 | 0.9846 | 0.5798 |
| 20    | 1.3251 | 1.2497 | 1.1283 | 1.2053 | 1.1043 | 0.9175 | 1.0012 | 0.5874 |
| 20.25 | 1.3374 | 1.2637 | 1.1419 | 1.2182 | 1.1158 | 0.932  | 1.013  | 0.5951 |
| 20.5  | 1.3474 | 1.2743 | 1.1521 | 1.2286 | 1.1266 | 0.947  | 1.0277 | 0.605  |
| 20.75 | 1.3589 | 1.2848 | 1.1637 | 1.2373 | 1.1394 | 0.9592 | 1.0421 | 0.6119 |
| 21    | 1.3704 | 1.2956 | 1.1744 | 1.2484 | 1.1495 | 0.9729 | 1.0523 | 0.6197 |
| 21.25 | 1.3806 | 1.3083 | 1.1829 | 1.2584 | 1.1625 | 0.9851 | 1.0671 | 0.627  |
| 21.5  | 1.39   | 1.3184 | 1.1906 | 1.2692 | 1.1723 | 1.0009 | 1.0789 | 0.6346 |
| 21.75 | 1.3999 | 1.3289 | 1.2037 | 1.2796 | 1.1811 | 1.0135 | 1.0914 | 0.6418 |
| 22    | 1.4093 | 1.3395 | 1.2116 | 1.2909 | 1.1938 | 1.0288 | 1.1036 | 0.6495 |
| 22.25 | 1.4189 | 1.3493 | 1.2223 | 1.2992 | 1.2046 | 1.0418 | 1.1165 | 0.6566 |
| 22.5  | 1.4278 | 1.3589 | 1.2316 | 1.3097 | 1.2144 | 1.0538 | 1.1289 | 0.6648 |
| 22.75 | 1.4356 | 1.369  | 1.2391 | 1.3179 | 1.224  | 1.0697 | 1.1398 | 0.6728 |
| 23    | 1.4425 | 1.3781 | 1.2485 | 1.3274 | 1.2327 | 1.0798 | 1.1521 | 0.6803 |
| 23.25 | 1.4488 | 1.3861 | 1.257  | 1.3353 | 1.2453 | 1.0934 | 1.1639 | 0.6879 |
| 23.5  | 1.4527 | 1.3947 | 1.2667 | 1.3434 | 1.2576 | 1.1048 | 1.1775 | 0.696  |
| 23.75 | 1.4559 | 1.4037 | 1.2752 | 1.353  | 1.2634 | 1.115  | 1.1885 | 0.7043 |
| 24    | 1.4583 | 1.4119 | 1.2845 | 1.3612 | 1.2727 | 1.1289 | 1.2002 | 0.712  |
| 24.25 | 1.4609 | 1.4188 | 1.2937 | 1.3668 | 1.2825 | 1.139  | 1.2122 | 0.7204 |
| 24.5  | 1.4615 | 1.4276 | 1.3014 | 1.3726 | 1.2902 | 1.1516 | 1.2239 | 0.7277 |
| 24.75 | 1.4635 | 1.4341 | 1.3101 | 1.3807 | 1.2994 | 1.1618 | 1.2336 | 0.7366 |
| 25    | 1.466  | 1.4379 | 1.3177 | 1.386  | 1.3079 | 1.174  | 1.2475 | 0.7442 |
| 25.25 | 1.4669 | 1.4431 | 1.3269 | 1.3898 | 1.316  | 1.1853 | 1.2576 | 0.752  |
| 25.5  | 1.4687 | 1.4476 | 1.3358 | 1.3922 | 1.3224 | 1.1938 | 1.2683 | 0.759  |
| 25.75 | 1.4687 | 1.4518 | 1.345  | 1.3959 | 1.3305 | 1.2044 | 1.278  | 0.7671 |
| 26    | 1.4682 | 1.453  | 1.3526 | 1.394  | 1.3296 | 1.2056 | 1.281  | 0.7665 |
| 26.25 | 1.4704 | 1.4557 | 1.3577 | 1.3951 | 1.3347 | 1.2146 | 1.2921 | 0.7737 |
| 26.5  | 1.4702 | 1.4595 | 1.368  | 1.3963 | 1.3381 | 1.2231 | 1.3021 | 0.7809 |
| 26.75 | 1.4706 | 1.4619 | 1.3756 | 1.3965 | 1.343  | 1.2315 | 1.3122 | 0.7891 |
| 27    | 1.4716 | 1.4639 | 1.3808 | 1.3986 | 1.348  | 1.2411 | 1.323  | 0.7974 |
| 27.25 | 1.4725 | 1.4677 | 1.3894 | 1.4003 | 1.3528 | 1.2498 | 1.3349 | 0.8058 |
| 27.5  | 1.473  | 1.4709 | 1.396  | 1.4019 | 1.355  | 1.2608 | 1.3438 | 0.8138 |
| 27.75 | 1.4747 | 1.4735 | 1.4025 | 1.4021 | 1.3584 | 1.27   | 1.354  | 0.8205 |
| 28    | 1.4747 | 1.4758 | 1.4095 | 1.4044 | 1.3612 | 1.2788 | 1.3648 | 0.8301 |
| 28.25 | 1.4772 | 1.4784 | 1.4156 | 1.406  | 1.3657 | 1.2909 | 1.3737 | 0.8373 |
| 28.5  | 1.4758 | 1.4806 | 1.4201 | 1.4067 | 1.368  | 1.301  | 1.384  | 0.8478 |
| 28.75 | 1.4763 | 1.4813 | 1.4239 | 1.4089 | 1.3718 | 1.3088 | 1.3927 | 0.856  |
| 29    | 1.4771 | 1.4829 | 1.4289 | 1.4099 | 1.3749 | 1.319  | 1.402  | 0.8665 |

|       |        |        |        |        |        |        |        |        |
|-------|--------|--------|--------|--------|--------|--------|--------|--------|
| 29.25 | 1.4786 | 1.485  | 1.4341 | 1.41   | 1.3851 | 1.3253 | 1.4103 | 0.873  |
| 29.5  | 1.4803 | 1.4861 | 1.4367 | 1.4122 | 1.3831 | 1.3348 | 1.4153 | 0.8838 |
| 29.75 | 1.4807 | 1.4866 | 1.4387 | 1.4132 | 1.3841 | 1.3434 | 1.4218 | 0.8907 |
| 30    | 1.4823 | 1.4892 | 1.4412 | 1.4148 | 1.3873 | 1.3509 | 1.4289 | 0.9011 |
| 30.25 | 1.4831 | 1.49   | 1.4444 | 1.4133 | 1.3825 | 1.3494 | 1.4237 | 0.901  |
| 30.5  | 1.4829 | 1.4913 | 1.4444 | 1.4141 | 1.3846 | 1.3515 | 1.4259 | 0.9081 |
| 30.75 | 1.4823 | 1.4923 | 1.4446 | 1.4168 | 1.3853 | 1.3552 | 1.4278 | 0.916  |
| 31    | 1.4825 | 1.4929 | 1.4466 | 1.4197 | 1.3884 | 1.361  | 1.4287 | 0.9235 |
| 31.25 | 1.4843 | 1.4939 | 1.448  | 1.4198 | 1.3912 | 1.3624 | 1.4316 | 0.9328 |
| 31.5  | 1.4842 | 1.496  | 1.4475 | 1.4204 | 1.3926 | 1.368  | 1.4332 | 0.9401 |
| 31.75 | 1.4837 | 1.4956 | 1.4475 | 1.4229 | 1.3973 | 1.3709 | 1.437  | 0.9489 |
| 32    | 1.4837 | 1.4964 | 1.4488 | 1.4243 | 1.3978 | 1.3754 | 1.4384 | 0.9576 |
| 32.25 | 1.4847 | 1.4969 | 1.4483 | 1.4251 | 1.4005 | 1.3769 | 1.4401 | 0.9642 |
| 32.5  | 1.4848 | 1.4964 | 1.448  | 1.4254 | 1.4018 | 1.3786 | 1.4433 | 0.9743 |
| 32.75 | 1.4858 | 1.4974 | 1.448  | 1.426  | 1.4029 | 1.3844 | 1.4437 | 0.9818 |
| 33    | 1.4867 | 1.4992 | 1.4467 | 1.4301 | 1.4036 | 1.3879 | 1.4474 | 0.9882 |
| 33.25 | 1.4876 | 1.498  | 1.4476 | 1.4297 | 1.4053 | 1.3898 | 1.4494 | 0.9961 |
| 33.5  | 1.4885 | 1.4993 | 1.4481 | 1.4316 | 1.4056 | 1.3913 | 1.4527 | 1.0034 |
| 33.75 | 1.4883 | 1.4994 | 1.4469 | 1.4343 | 1.4063 | 1.3919 | 1.4554 | 1.0097 |
| 34    | 1.4888 | 1.4988 | 1.4474 | 1.4358 | 1.4083 | 1.395  | 1.4597 | 1.0188 |
| 34.25 | 1.4892 | 1.4995 | 1.4471 | 1.4373 | 1.4101 | 1.3962 | 1.4627 | 1.0233 |
| 34.5  | 1.4899 | 1.4996 | 1.4474 | 1.4393 | 1.4104 | 1.4005 | 1.4623 | 1.0332 |
| 34.75 | 1.4919 | 1.5003 | 1.4472 | 1.4396 | 1.417  | 1.3997 | 1.4656 | 1.0375 |
| 35    | 1.492  | 1.5014 | 1.4486 | 1.441  | 1.4138 | 1.4018 | 1.4667 | 1.0444 |
| 35.25 | 1.4922 | 1.502  | 1.4486 | 1.4411 | 1.417  | 1.4017 | 1.4677 | 1.0528 |
| 35.5  | 1.4933 | 1.5004 | 1.4477 | 1.4433 | 1.4155 | 1.4051 | 1.4692 | 1.06   |
| 35.75 | 1.4939 | 1.5019 | 1.4479 | 1.4439 | 1.4167 | 1.4084 | 1.4717 | 1.0652 |
| 36    | 1.4951 | 1.5018 | 1.4476 | 1.4443 | 1.416  | 1.4096 | 1.4734 | 1.0747 |
| 36.25 | 1.4965 | 1.5015 | 1.4469 | 1.4482 | 1.4171 | 1.4106 | 1.4757 | 1.0813 |
| 36.5  | 1.4976 | 1.5021 | 1.4473 | 1.4474 | 1.418  | 1.4118 | 1.4764 | 1.0878 |
| 36.75 | 1.4983 | 1.5037 | 1.4481 | 1.4469 | 1.417  | 1.4097 | 1.4756 | 1.0901 |
| 37    | 1.4992 | 1.5034 | 1.4477 | 1.4466 | 1.4124 | 1.405  | 1.4728 | 1.0917 |
| 37.25 | 1.4997 | 1.504  | 1.449  | 1.4483 | 1.4132 | 1.4057 | 1.4728 | 1.0969 |
| 37.5  | 1.5011 | 1.5037 | 1.4489 | 1.4463 | 1.4152 | 1.4062 | 1.4737 | 1.1026 |
| 37.75 | 1.502  | 1.505  | 1.4486 | 1.4479 | 1.4141 | 1.4061 | 1.475  | 1.1074 |
| 38    | 1.5029 | 1.5047 | 1.4475 | 1.4493 | 1.4157 | 1.4072 | 1.4754 | 1.1149 |
| 38.25 | 1.5029 | 1.5046 | 1.449  | 1.4495 | 1.4152 | 1.406  | 1.4759 | 1.1181 |
| 38.5  | 1.504  | 1.505  | 1.4481 | 1.4512 | 1.4163 | 1.406  | 1.4781 | 1.1252 |
| 38.75 | 1.5035 | 1.5042 | 1.448  | 1.4526 | 1.4176 | 1.4076 | 1.4783 | 1.1317 |
| 39    | 1.5042 | 1.505  | 1.4488 | 1.4531 | 1.4195 | 1.4092 | 1.4821 | 1.1385 |
| 39.25 | 1.5058 | 1.5049 | 1.4482 | 1.4533 | 1.4192 | 1.4102 | 1.4831 | 1.1439 |
| 39.5  | 1.507  | 1.5052 | 1.4485 | 1.4548 | 1.4204 | 1.4123 | 1.4836 | 1.1509 |

|       |        |        |        |        |        |        |        |        |
|-------|--------|--------|--------|--------|--------|--------|--------|--------|
| 39.75 | 1.5073 | 1.506  | 1.4484 | 1.4554 | 1.4213 | 1.411  | 1.4856 | 1.1545 |
| 40    | 1.5077 | 1.5062 | 1.4489 | 1.4559 | 1.4221 | 1.4165 | 1.4875 | 1.1612 |
| 40.25 | 1.5093 | 1.5063 | 1.4496 | 1.4558 | 1.4232 | 1.4151 | 1.4882 | 1.165  |
| 40.5  | 1.5096 | 1.506  | 1.4489 | 1.457  | 1.4222 | 1.4166 | 1.4908 | 1.171  |
| 40.75 | 1.5108 | 1.5059 | 1.4494 | 1.4578 | 1.4243 | 1.4167 | 1.4918 | 1.1776 |
| 41    | 1.5129 | 1.5053 | 1.4485 | 1.4584 | 1.4231 | 1.4196 | 1.4928 | 1.1807 |
| 41.25 | 1.5127 | 1.5048 | 1.4491 | 1.4585 | 1.4256 | 1.4184 | 1.4937 | 1.1859 |
| 41.5  | 1.513  | 1.5052 | 1.4495 | 1.4585 | 1.426  | 1.4198 | 1.4954 | 1.1897 |
| 41.75 | 1.513  | 1.5045 | 1.4496 | 1.4591 | 1.4259 | 1.4191 | 1.4955 | 1.1926 |
| 42    | 1.5143 | 1.506  | 1.4492 | 1.4608 | 1.4252 | 1.423  | 1.4959 | 1.1997 |
| 42.25 | 1.5164 | 1.506  | 1.4512 | 1.4609 | 1.4267 | 1.4225 | 1.4977 | 1.2032 |
| 42.5  | 1.5166 | 1.5062 | 1.4516 | 1.4623 | 1.4256 | 1.4244 | 1.4993 | 1.2085 |
| 42.75 | 1.518  | 1.506  | 1.4518 | 1.4621 | 1.4254 | 1.4241 | 1.4994 | 1.2109 |
| 43    | 1.5154 | 1.5053 | 1.4522 | 1.4628 | 1.4252 | 1.4246 | 1.5013 | 1.2172 |
| 43.25 | 1.5129 | 1.5059 | 1.4522 | 1.4643 | 1.426  | 1.4233 | 1.5019 | 1.2209 |
| 43.5  | 1.5111 | 1.5064 | 1.4527 | 1.4654 | 1.4256 | 1.423  | 1.5027 | 1.2231 |
| 43.75 | 1.5114 | 1.5084 | 1.453  | 1.4643 | 1.4267 | 1.4255 | 1.5044 | 1.2283 |
| 44    | 1.5125 | 1.5078 | 1.4529 | 1.4648 | 1.4295 | 1.4258 | 1.5052 | 1.2313 |
| 44.25 | 1.5102 | 1.5073 | 1.4529 | 1.4639 | 1.4267 | 1.4273 | 1.5057 | 1.235  |
| 44.5  | 1.5105 | 1.5065 | 1.4523 | 1.4642 | 1.4269 | 1.4258 | 1.5067 | 1.2396 |
| 44.75 | 1.5104 | 1.5065 | 1.454  | 1.4649 | 1.4262 | 1.4263 | 1.508  | 1.2438 |
| 45    | 1.5092 | 1.5064 | 1.4543 | 1.4666 | 1.4255 | 1.4266 | 1.5078 | 1.2451 |
| 45.25 | 1.5105 | 1.5057 | 1.4541 | 1.4652 | 1.4265 | 1.4268 | 1.5091 | 1.2477 |
| 45.5  | 1.5103 | 1.5065 | 1.4557 | 1.4676 | 1.4282 | 1.428  | 1.511  | 1.2505 |
| 45.75 | 1.51   | 1.5067 | 1.4559 | 1.466  | 1.4268 | 1.4262 | 1.5106 | 1.2536 |
| 46    | 1.5108 | 1.5061 | 1.4561 | 1.4664 | 1.4287 | 1.4271 | 1.5124 | 1.2577 |
| 46.25 | 1.5109 | 1.5064 | 1.456  | 1.4659 | 1.4276 | 1.4278 | 1.512  | 1.2587 |
| 46.5  | 1.511  | 1.5069 | 1.4571 | 1.4646 | 1.4308 | 1.4276 | 1.5132 | 1.2632 |
| 46.75 | 1.511  | 1.5052 | 1.4577 | 1.4649 | 1.429  | 1.4271 | 1.5151 | 1.2677 |
| 47    | 1.5111 | 1.5059 | 1.4574 | 1.4663 | 1.4261 | 1.4271 | 1.5154 | 1.27   |
| 47.25 | 1.5102 | 1.5042 | 1.4571 | 1.4676 | 1.4271 | 1.4264 | 1.5157 | 1.2728 |
| 47.5  | 1.5112 | 1.5044 | 1.4583 | 1.4669 | 1.4266 | 1.4261 | 1.516  | 1.2766 |
| 47.75 | 1.5109 | 1.5036 | 1.4575 | 1.4696 | 1.4266 | 1.4246 | 1.5166 | 1.2777 |
| 48    | 1.511  | 1.5046 | 1.4582 | 1.4697 | 1.4257 | 1.4269 | 1.5182 | 1.2806 |
| 48.25 | 1.511  | 1.5042 | 1.4587 | 1.4682 | 1.4262 | 1.4252 | 1.518  | 1.2831 |
| 48.5  | 1.5111 | 1.504  | 1.4592 | 1.4677 | 1.4251 | 1.4253 | 1.52   | 1.2838 |
| 48.75 | 1.5107 | 1.5019 | 1.4578 | 1.4679 | 1.425  | 1.4254 | 1.5193 | 1.2866 |
| 49    | 1.5112 | 1.5026 | 1.4586 | 1.4678 | 1.4259 | 1.4251 | 1.5206 | 1.2891 |
| 49.25 | 1.5109 | 1.5034 | 1.4604 | 1.4681 | 1.4257 | 1.4252 | 1.5207 | 1.2935 |
| 49.5  | 1.5094 | 1.504  | 1.4603 | 1.4691 | 1.4255 | 1.427  | 1.5214 | 1.2951 |
| 49.75 | 1.5105 | 1.5038 | 1.4602 | 1.4685 | 1.4254 | 1.424  | 1.5223 | 1.2976 |

|            | <b>K6</b>    | <b>K7</b>     | <b>K8</b>     |
|------------|--------------|---------------|---------------|
|            | <b>RAD 3</b> | <b>RAD 10</b> | <b>RAD 30</b> |
|            | 0.1851       | 0.1736        | 0.1701        |
|            | 0.1652       | 0.1595        | 0.1548        |
|            | 0.1632       | 0.1577        | 0.153         |
|            | 0.1611       | 0.1577        | 0.152         |
|            | 0.1602       | 0.1575        | 0.1518        |
|            | 0.161        | 0.158         | 0.1527        |
|            |              | 0.1581        | 0.1522        |
|            |              | 0.1586        | 0.1529        |
|            |              | 0.1598        | 0.1531        |
|            |              | 0.1611        | 0.1548        |
|            |              | 0.1637        | 0.1554        |
|            |              | 0.1652        | 0.157         |
|            |              | 0.1672        | 0.1584        |
|            |              | 0.1696        | 0.1597        |
|            |              | 0.171         | 0.1612        |
|            |              | 0.1734        | 0.1631        |
|            |              | 0.1755        | 0.1642        |
|            |              | 0.1787        | 0.166         |
|            |              | 0.1807        | 0.1679        |
|            |              | 0.1834        | 0.1696        |
|            |              | 0.1866        | 0.1714        |
|            |              | 0.1901        | 0.1742        |
|            |              | 0.1933        | 0.1762        |
|            |              | 0.197         | 0.1782        |
|            |              | 0.2004        | 0.1798        |
|            |              | 0.2032        | 0.183         |
|            |              | 0.2088        | 0.1853        |
|            |              | 0.2128        | 0.1882        |
|            |              | 0.2176        | 0.1896        |
|            |              | 0.2227        | 0.1936        |
|            |              | 0.2271        | 0.1959        |
|            |              | 0.2337        | 0.1989        |
|            |              | 0.2382        | 0.2014        |
| WT         |              |               |               |
| WT(GA 3)   |              |               |               |
| WT (RAD 3) |              |               |               |
| NO DRUG    |              |               |               |
| GA 3uM     |              |               |               |
| NOVO 100   |              |               |               |
| RAD 3      |              |               |               |
| GA 7uM     |              |               |               |
| RAD 10     |              |               |               |
| NOVO 250   |              |               |               |
| RAD 30     |              |               |               |

|        |        |        |
|--------|--------|--------|
|        | 0.2437 | 0.2042 |
|        | 0.2491 | 0.2068 |
|        | 0.256  | 0.2108 |
|        | 0.2628 | 0.2127 |
|        | 0.2693 | 0.2165 |
|        | 0.277  | 0.2197 |
|        | 0.2854 | 0.223  |
|        | 0.2933 | 0.227  |
| 0.3433 | 0.3028 | 0.231  |
| 0.356  | 0.3122 | 0.2352 |
| 0.3672 | 0.3204 | 0.2391 |
| 0.3793 | 0.3311 | 0.2448 |
| 0.3938 | 0.3403 | 0.2486 |
| 0.4076 | 0.3504 | 0.2516 |
| 0.4232 | 0.3616 | 0.2572 |
| 0.4367 | 0.3707 | 0.2617 |
| 0.4518 | 0.3811 | 0.267  |
| 0.4686 | 0.3931 | 0.2713 |
| 0.4857 | 0.4049 | 0.2761 |
| 0.5065 | 0.4182 | 0.2805 |
| 0.5271 | 0.4325 | 0.2867 |
| 0.5493 | 0.4462 | 0.2915 |
| 0.5723 | 0.4604 | 0.2959 |
| 0.5932 | 0.4735 | 0.2989 |
| 0.6183 | 0.4874 | 0.3059 |
| 0.6404 | 0.5007 | 0.3106 |
| 0.662  | 0.5173 | 0.3195 |
| 0.6868 | 0.5265 | 0.3254 |
| 0.7032 | 0.5396 | 0.3335 |
| 0.7252 | 0.5526 | 0.3363 |
| 0.747  | 0.5674 | 0.339  |
| 0.7699 | 0.5817 | 0.3429 |
| 0.7904 | 0.5972 | 0.3486 |
| 0.8128 | 0.6116 | 0.3539 |
| 0.8339 | 0.6257 | 0.3603 |
| 0.8496 | 0.6394 | 0.3655 |
| 0.8691 | 0.6555 | 0.3706 |
| 0.888  | 0.6699 | 0.377  |
| 0.9054 | 0.6867 | 0.3828 |
| 0.923  | 0.7014 | 0.3899 |
| 0.9395 | 0.7196 | 0.3953 |
| 0.9561 | 0.7322 | 0.4016 |
| 0.9704 |        |        |

|        |        |        |
|--------|--------|--------|
| 0.9845 | 0.7468 | 0.4088 |
| 0.9971 | 0.7616 | 0.4133 |
| 1.0124 | 0.7766 | 0.4209 |
| 1.0258 | 0.7912 | 0.4274 |
| 1.04   | 0.8036 | 0.434  |
| 1.0537 | 0.8188 | 0.4411 |
| 1.066  | 0.8314 | 0.4468 |
| 1.0793 | 0.8418 | 0.4533 |
| 1.0911 | 0.8561 | 0.46   |
| 1.1012 | 0.8697 | 0.467  |
| 1.115  | 0.8796 | 0.4737 |
| 1.125  | 0.8893 | 0.48   |
| 1.1371 | 0.9022 | 0.4885 |
| 1.1487 | 0.9127 | 0.4938 |
| 1.159  | 0.9228 | 0.5008 |
| 1.17   | 0.9321 | 0.5075 |
| 1.1792 | 0.9417 | 0.5145 |
| 1.1895 | 0.9495 | 0.5204 |
| 1.202  | 0.9571 | 0.5317 |
| 1.2115 | 0.9659 | 0.535  |
| 1.2208 | 0.9754 | 0.5445 |
| 1.2291 | 0.9836 | 0.5502 |
| 1.2393 | 0.9936 | 0.5575 |
| 1.2489 | 1.0008 | 0.565  |
| 1.2578 | 1.0066 | 0.5738 |
| 1.2663 | 1.0163 | 0.5771 |
| 1.2738 | 1.0234 | 0.5871 |
| 1.2848 | 1.0313 | 0.5925 |
| 1.2928 | 1.0393 | 0.6001 |
| 1.2953 | 1.0421 | 0.6048 |
| 1.3047 | 1.0497 | 0.6105 |
| 1.312  | 1.0592 | 0.6168 |
| 1.3219 | 1.0646 | 0.6241 |
| 1.3304 | 1.0723 | 0.6314 |
| 1.3387 | 1.0806 | 0.639  |
| 1.3459 | 1.088  | 0.6458 |
| 1.3556 | 1.0969 | 0.653  |
| 1.3625 | 1.1042 | 0.6588 |
| 1.37   | 1.1135 | 0.6664 |
| 1.3779 | 1.1209 | 0.6733 |
| 1.3873 | 1.1301 | 0.6795 |
| 1.3949 | 1.137  | 0.6878 |



|        |        |        |
|--------|--------|--------|
| 1.4039 | 1.1452 | 0.6941 |
| 1.4067 | 1.1558 | 0.7024 |
| 1.4116 | 1.163  | 0.7089 |
| 1.4153 | 1.1697 | 0.7142 |
| 1.4154 | 1.177  | 0.7167 |
| 1.4203 | 1.1849 | 0.723  |
| 1.4219 | 1.1923 | 0.7283 |
| 1.4227 | 1.1996 | 0.7354 |
| 1.4265 | 1.2074 | 0.7412 |
| 1.4272 | 1.2138 | 0.7463 |
| 1.4293 | 1.2222 | 0.7534 |
| 1.4326 | 1.23   | 0.7615 |
| 1.4326 | 1.2382 | 0.7663 |
| 1.4325 | 1.2426 | 0.7719 |
| 1.4344 | 1.2523 | 0.7778 |
| 1.4362 | 1.2588 | 0.7827 |
| 1.4358 | 1.2649 | 0.7888 |
| 1.4345 | 1.2723 | 0.7953 |
| 1.4357 | 1.2793 | 0.8017 |
| 1.4368 | 1.283  | 0.806  |
| 1.4373 | 1.2913 | 0.8127 |
| 1.4376 | 1.2973 | 0.8189 |
| 1.4382 | 1.3058 | 0.8227 |
| 1.4395 | 1.3113 | 0.8308 |
| 1.4414 | 1.3169 | 0.8359 |
| 1.44   | 1.3257 | 0.8389 |
| 1.4408 | 1.3286 | 0.8429 |
| 1.4408 | 1.3345 | 0.8477 |
| 1.4412 | 1.3417 | 0.8543 |
| 1.4413 | 1.3461 | 0.8586 |
| 1.4395 | 1.3511 | 0.8613 |
| 1.4382 | 1.3555 | 0.8649 |
| 1.4375 | 1.3617 | 0.8707 |
| 1.4374 | 1.3674 | 0.8746 |
| 1.4388 | 1.3716 | 0.8795 |
| 1.4387 | 1.3767 | 0.8864 |
| 1.4382 | 1.3806 | 0.8903 |
| 1.4401 | 1.3858 | 0.8958 |
| 1.4403 | 1.3908 | 0.8995 |
| 1.441  | 1.3947 | 0.9051 |
| 1.4412 | 1.3983 | 0.9091 |
| 1.4425 | 1.4016 | 0.9144 |

|        |        |        |
|--------|--------|--------|
| 1.4431 | 1.4053 | 0.9187 |
| 1.4439 | 1.4084 | 0.9249 |
| 1.4445 | 1.4116 | 0.9301 |
| 1.4451 | 1.4123 | 0.9359 |
| 1.4453 | 1.4154 | 0.9412 |
| 1.4484 | 1.4157 | 0.9468 |
| 1.4476 | 1.4169 | 0.9499 |
| 1.4477 | 1.4201 | 0.9547 |
| 1.4481 | 1.4198 | 0.9593 |
| 1.4485 | 1.4205 | 0.9653 |
| 1.4494 | 1.4222 | 0.9686 |
| 1.4509 | 1.4232 | 0.974  |
| 1.4504 | 1.4244 | 0.9791 |
| 1.4513 | 1.4263 | 0.9846 |
| 1.4515 | 1.4261 | 0.9902 |
| 1.4524 | 1.4266 | 0.9936 |
| 1.4538 | 1.4284 | 0.9998 |
| 1.453  | 1.427  | 1.0028 |
| 1.4546 | 1.4281 | 1.0076 |
| 1.4553 | 1.4284 | 1.0124 |
| 1.4565 | 1.4298 | 1.0183 |
| 1.4569 | 1.4299 | 1.0213 |
| 1.4571 | 1.4299 | 1.0268 |
| 1.458  | 1.4307 | 1.0316 |
| 1.4573 | 1.4308 | 1.0356 |
| 1.4579 | 1.4302 | 1.0388 |
| 1.4597 | 1.4313 | 1.0452 |
| 1.4599 | 1.4338 | 1.0515 |
| 1.4592 | 1.4326 | 1.0529 |
| 1.4601 | 1.4315 | 1.0589 |
| 1.4601 | 1.4337 | 1.0624 |
| 1.4607 | 1.4336 | 1.0673 |
| 1.4608 | 1.4351 | 1.0724 |
| 1.4617 | 1.4339 | 1.0758 |
| 1.4617 | 1.436  | 1.0798 |
| 1.4617 | 1.435  | 1.0844 |
| 1.4619 | 1.4345 | 1.091  |
| 1.4634 | 1.4359 | 1.0918 |
| 1.4627 | 1.4346 | 1.0978 |
| 1.4623 | 1.4357 | 1.1031 |
| 1.4632 | 1.4366 | 1.1082 |

|             |           |                  | <b>F9</b>        |                | <b>F10</b>    |               | <b>F11</b>      |                 | <b>F12</b> |  | <b>F13</b> |  |
|-------------|-----------|------------------|------------------|----------------|---------------|---------------|-----------------|-----------------|------------|--|------------|--|
| <b>TIME</b> | <b>WT</b> | <b>WT (GA 3)</b> | <b>WT(RAD 3)</b> | <b>NO DRUG</b> | <b>GA 3uM</b> | <b>GA 7uM</b> | <b>NOVO 100</b> | <b>NOVO 250</b> |            |  |            |  |
| 0           | 0.1894    | 0.2051           | 0.1892           | 0.1687         | 0.1676        | 0.1731        | 0.2042          | 0.2461          |            |  |            |  |
| 0.25        | 0.1844    | 0.1929           | 0.1812           | 0.1598         | 0.1597        | 0.1664        | 0.2101          | 0.2474          |            |  |            |  |
| 0.5         | 0.1833    | 0.1912           | 0.1787           | 0.1575         | 0.1576        | 0.1635        | 0.2108          | 0.2501          |            |  |            |  |
| 0.75        | 0.1838    | 0.189            | 0.1758           | 0.1558         | 0.1559        | 0.1635        | 0.2112          | 0.2526          |            |  |            |  |
| 1           | 0.1843    | 0.1877           | 0.1818           | 0.1551         | 0.1558        | 0.1631        | 0.2122          | 0.2549          |            |  |            |  |

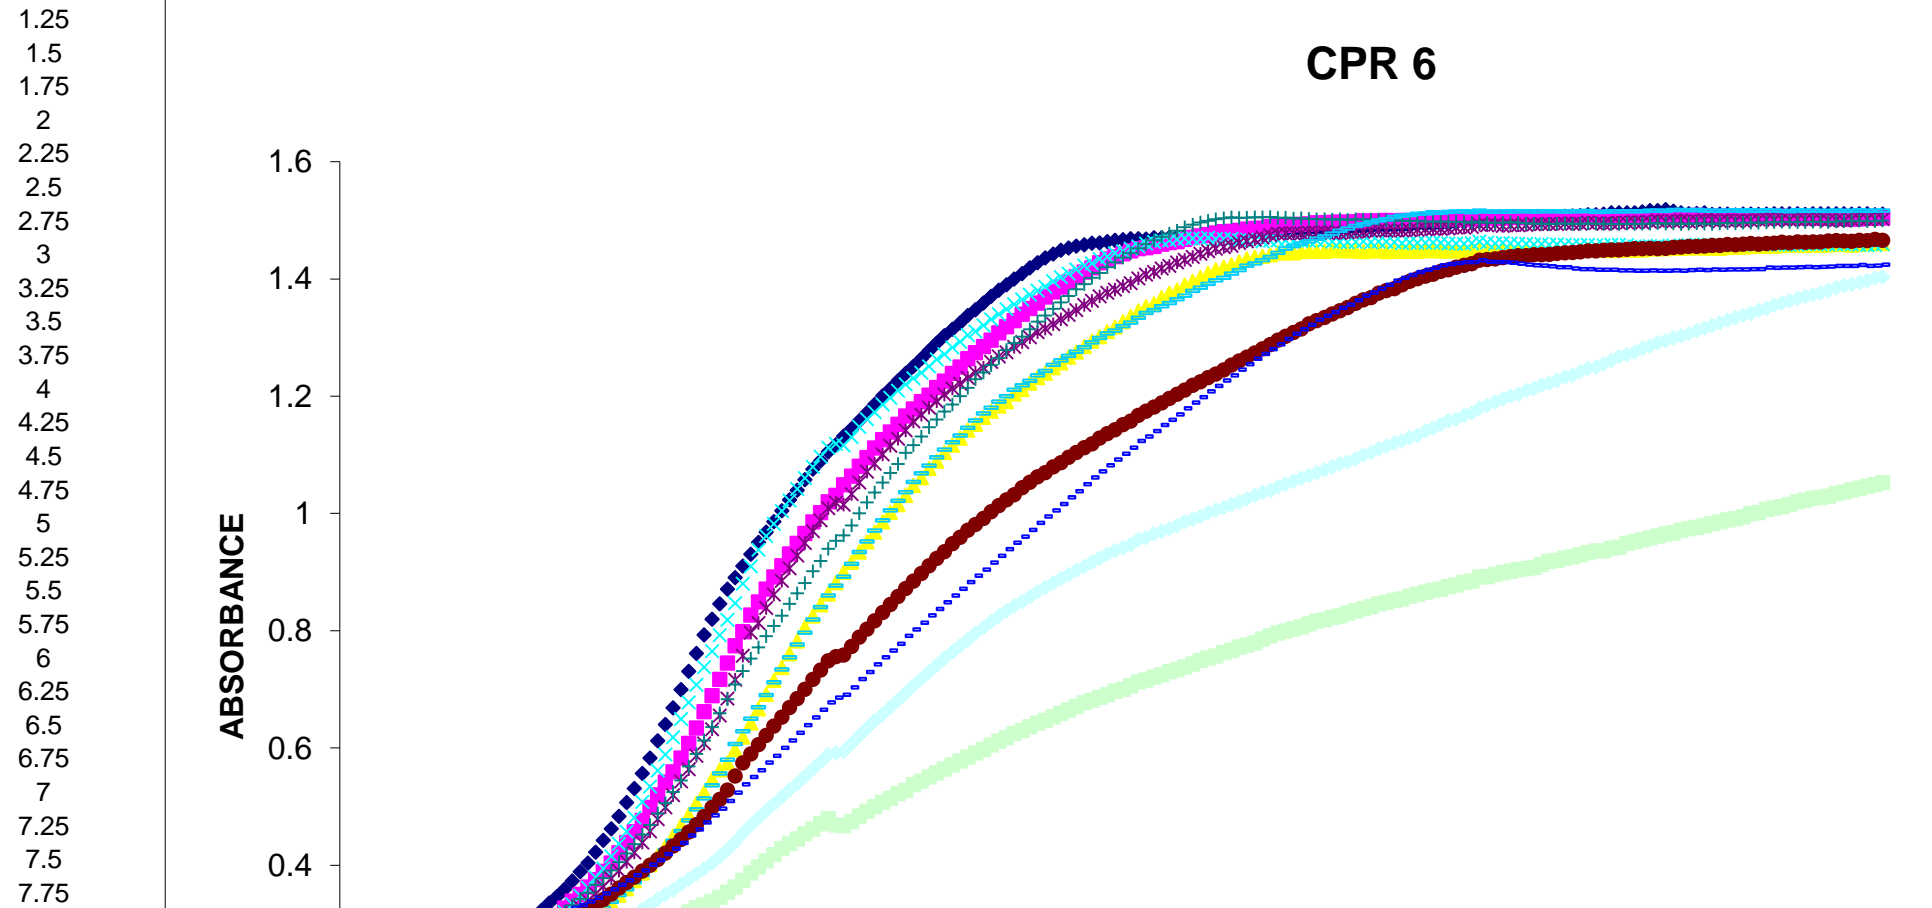

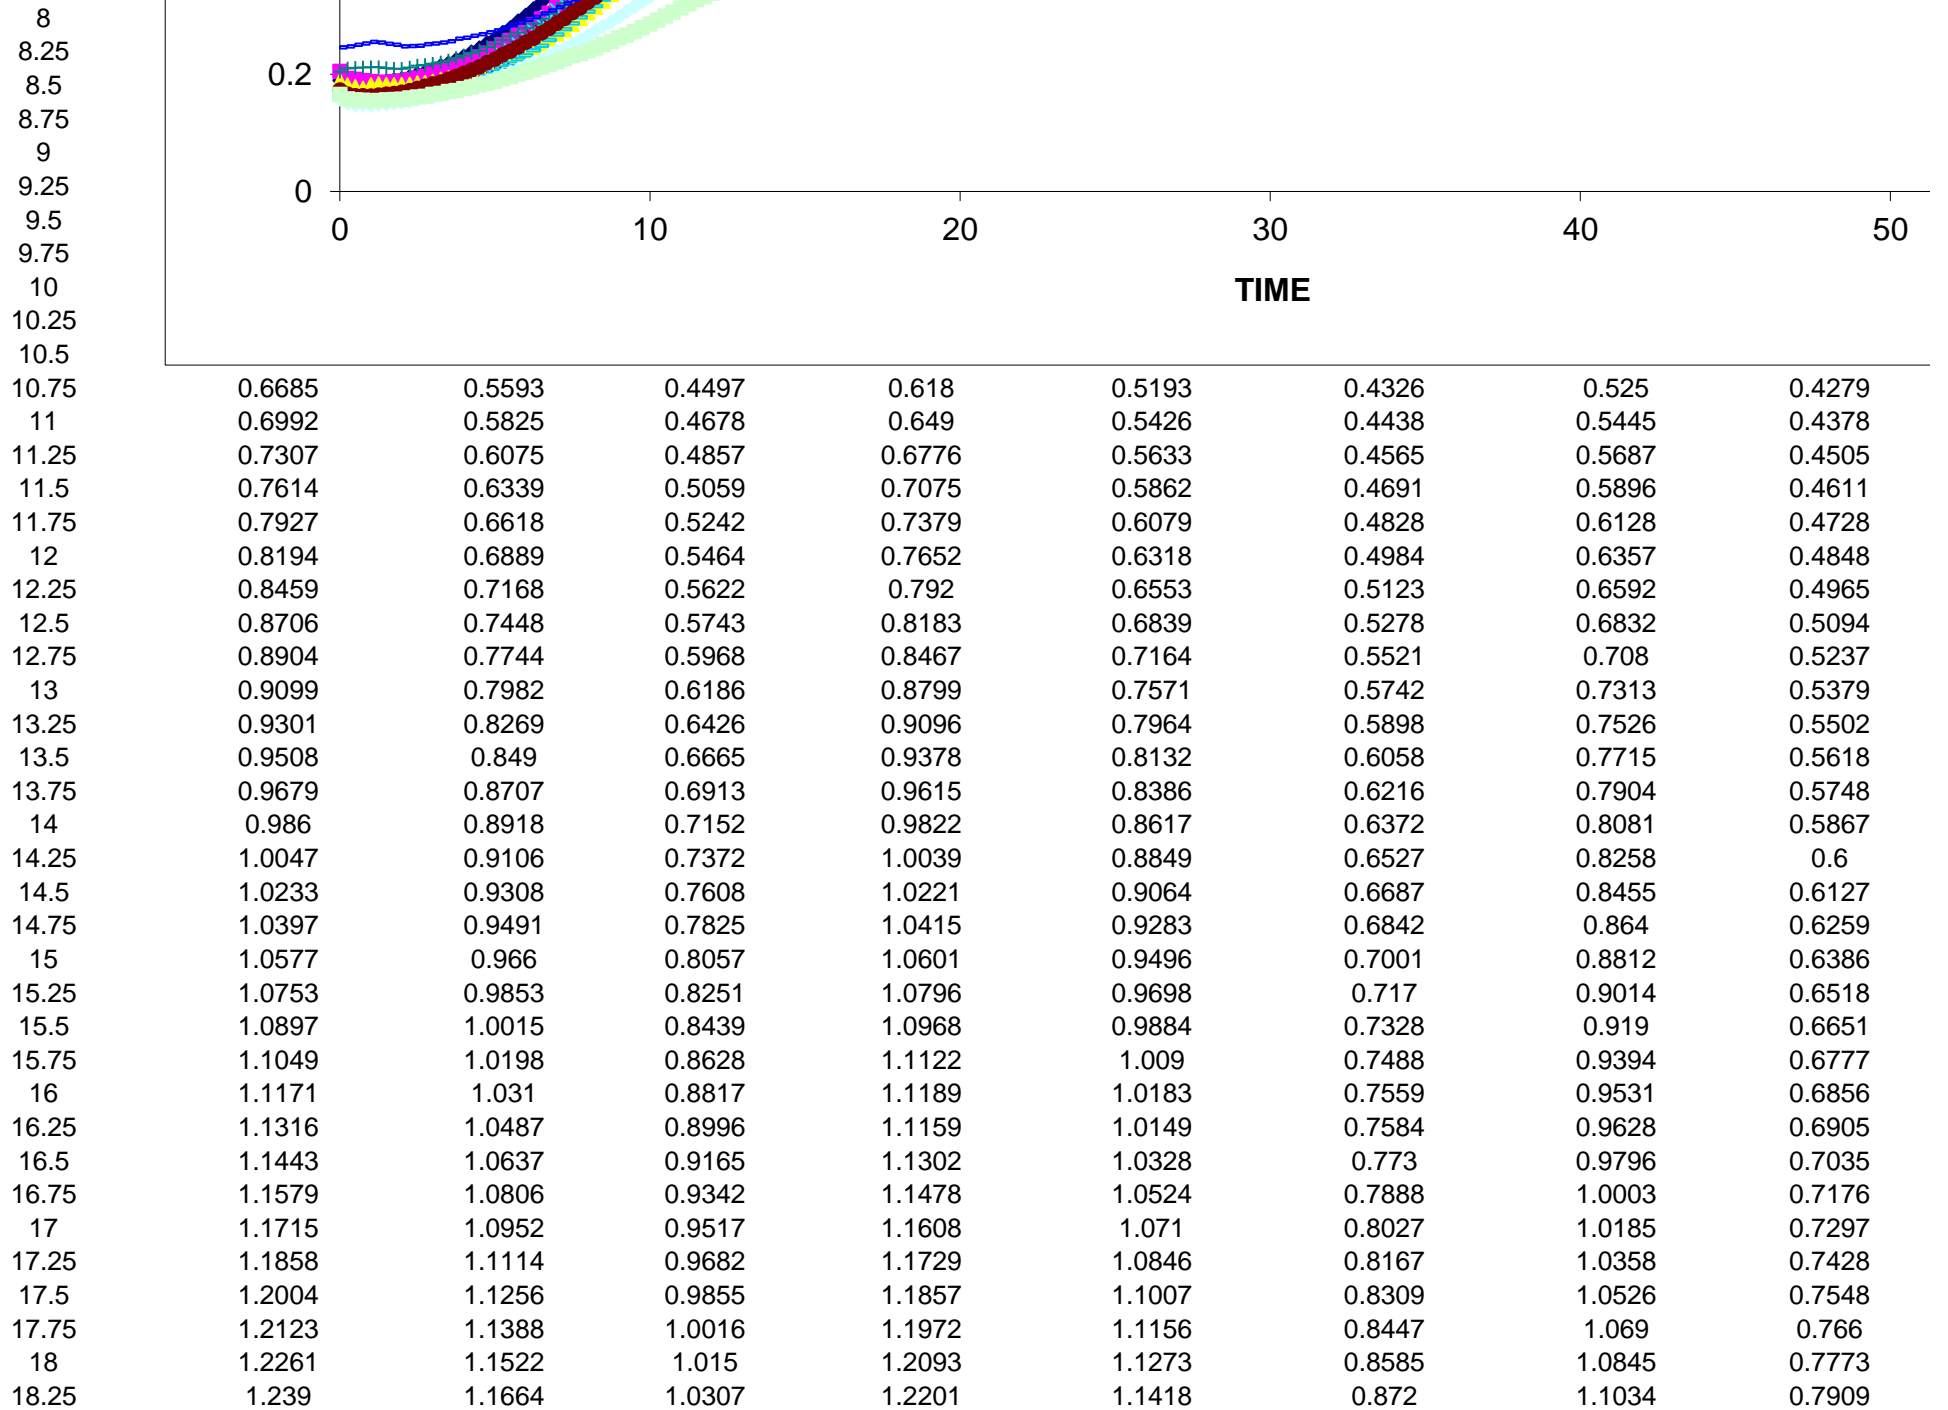

|       |        |        |        |        |        |        |        |        |
|-------|--------|--------|--------|--------|--------|--------|--------|--------|
| 18.5  | 1.251  | 1.1779 | 1.0478 | 1.2304 | 1.157  | 0.8843 | 1.1166 | 0.8022 |
| 18.75 | 1.2641 | 1.1907 | 1.0607 | 1.2399 | 1.1686 | 0.8975 | 1.1313 | 0.8138 |
| 19    | 1.2773 | 1.2018 | 1.0765 | 1.2507 | 1.1803 | 0.9109 | 1.1472 | 0.8259 |
| 19.25 | 1.2907 | 1.2145 | 1.0891 | 1.2625 | 1.191  | 0.9234 | 1.1603 | 0.8368 |
| 19.5  | 1.3032 | 1.2259 | 1.1041 | 1.2716 | 1.2028 | 0.9349 | 1.174  | 0.8483 |
| 19.75 | 1.3141 | 1.239  | 1.1166 | 1.2828 | 1.2129 | 0.9484 | 1.186  | 0.8599 |
| 20    | 1.3251 | 1.2497 | 1.1283 | 1.2926 | 1.2215 | 0.9592 | 1.2001 | 0.8713 |
| 20.25 | 1.3374 | 1.2637 | 1.1419 | 1.3042 | 1.2311 | 0.9712 | 1.2141 | 0.8826 |
| 20.5  | 1.3474 | 1.2743 | 1.1521 | 1.3105 | 1.2404 | 0.981  | 1.2288 | 0.894  |
| 20.75 | 1.3589 | 1.2848 | 1.1637 | 1.3206 | 1.2488 | 0.9913 | 1.2405 | 0.9044 |
| 21    | 1.3704 | 1.2956 | 1.1744 | 1.3312 | 1.2584 | 1.0027 | 1.2531 | 0.9162 |
| 21.25 | 1.3806 | 1.3083 | 1.1829 | 1.3398 | 1.2674 | 1.0131 | 1.265  | 0.9274 |
| 21.5  | 1.39   | 1.3184 | 1.1906 | 1.3485 | 1.275  | 1.0231 | 1.2786 | 0.9391 |
| 21.75 | 1.3999 | 1.3289 | 1.2037 | 1.3568 | 1.2843 | 1.0318 | 1.2907 | 0.9502 |
| 22    | 1.4093 | 1.3395 | 1.2116 | 1.3651 | 1.292  | 1.0439 | 1.3014 | 0.9602 |
| 22.25 | 1.4189 | 1.3493 | 1.2223 | 1.3732 | 1.3004 | 1.0529 | 1.3138 | 0.9718 |
| 22.5  | 1.4278 | 1.3589 | 1.2316 | 1.3801 | 1.3093 | 1.0622 | 1.3272 | 0.9836 |
| 22.75 | 1.4356 | 1.369  | 1.2391 | 1.3865 | 1.3149 | 1.0693 | 1.3377 | 0.9948 |
| 23    | 1.4425 | 1.3781 | 1.2485 | 1.3959 | 1.3226 | 1.0794 | 1.3489 | 1.0051 |
| 23.25 | 1.4488 | 1.3861 | 1.257  | 1.4028 | 1.3309 | 1.0864 | 1.3597 | 1.0163 |
| 23.5  | 1.4527 | 1.3947 | 1.2667 | 1.4089 | 1.3387 | 1.0958 | 1.3709 | 1.0275 |
| 23.75 | 1.4559 | 1.4037 | 1.2752 | 1.4162 | 1.3469 | 1.104  | 1.3825 | 1.0377 |
| 24    | 1.4583 | 1.4119 | 1.2845 | 1.4225 | 1.3558 | 1.1119 | 1.3909 | 1.0497 |
| 24.25 | 1.4609 | 1.4188 | 1.2937 | 1.4266 | 1.3627 | 1.1189 | 1.4018 | 1.0613 |
| 24.5  | 1.4615 | 1.4276 | 1.3014 | 1.4339 | 1.3703 | 1.1283 | 1.4102 | 1.0718 |
| 24.75 | 1.4635 | 1.4341 | 1.3101 | 1.4382 | 1.3765 | 1.1359 | 1.4197 | 1.0819 |
| 25    | 1.466  | 1.4379 | 1.3177 | 1.4439 | 1.382  | 1.1427 | 1.4282 | 1.092  |
| 25.25 | 1.4669 | 1.4431 | 1.3269 | 1.4472 | 1.3876 | 1.1512 | 1.4364 | 1.1018 |
| 25.5  | 1.4687 | 1.4476 | 1.3358 | 1.4514 | 1.3929 | 1.1575 | 1.4439 | 1.1119 |
| 25.75 | 1.4687 | 1.4518 | 1.345  | 1.4554 | 1.4006 | 1.1673 | 1.4524 | 1.1234 |
| 26    | 1.4682 | 1.453  | 1.3526 | 1.4602 | 1.4073 | 1.1744 | 1.4593 | 1.1311 |
| 26.25 | 1.4704 | 1.4557 | 1.3577 | 1.4629 | 1.4116 | 1.1816 | 1.4656 | 1.1404 |
| 26.5  | 1.4702 | 1.4595 | 1.368  | 1.465  | 1.4178 | 1.1885 | 1.4716 | 1.1509 |
| 26.75 | 1.4706 | 1.4619 | 1.3756 | 1.466  | 1.4224 | 1.1962 | 1.4773 | 1.1597 |
| 27    | 1.4716 | 1.4639 | 1.3808 | 1.4675 | 1.4283 | 1.2033 | 1.4824 | 1.1691 |
| 27.25 | 1.4725 | 1.4677 | 1.3894 | 1.4689 | 1.4326 | 1.2103 | 1.4883 | 1.1795 |
| 27.5  | 1.473  | 1.4709 | 1.396  | 1.4693 | 1.4374 | 1.2183 | 1.4926 | 1.1889 |
| 27.75 | 1.4747 | 1.4735 | 1.4025 | 1.4684 | 1.4428 | 1.2244 | 1.4966 | 1.1982 |
| 28    | 1.4747 | 1.4758 | 1.4095 | 1.47   | 1.4472 | 1.2318 | 1.4993 | 1.2082 |
| 28.25 | 1.4772 | 1.4784 | 1.4156 | 1.4681 | 1.4516 | 1.2376 | 1.5018 | 1.2174 |
| 28.5  | 1.4758 | 1.4806 | 1.4201 | 1.4682 | 1.4544 | 1.245  | 1.5034 | 1.227  |
| 28.75 | 1.4763 | 1.4813 | 1.4239 | 1.4684 | 1.4568 | 1.2529 | 1.5049 | 1.2357 |

|       |        |        |        |        |        |        |        |        |
|-------|--------|--------|--------|--------|--------|--------|--------|--------|
| 29    | 1.4771 | 1.4829 | 1.4289 | 1.4659 | 1.4612 | 1.2598 | 1.5039 | 1.2455 |
| 29.25 | 1.4786 | 1.485  | 1.4341 | 1.4667 | 1.4641 | 1.2666 | 1.5048 | 1.2547 |
| 29.5  | 1.4803 | 1.4861 | 1.4367 | 1.4659 | 1.4677 | 1.2735 | 1.5051 | 1.2638 |
| 29.75 | 1.4807 | 1.4866 | 1.4387 | 1.464  | 1.4708 | 1.281  | 1.5052 | 1.2723 |
| 30    | 1.4823 | 1.4892 | 1.4412 | 1.4651 | 1.4744 | 1.2879 | 1.5058 | 1.28   |
| 30.25 | 1.4831 | 1.49   | 1.4444 | 1.4656 | 1.4774 | 1.2954 | 1.5041 | 1.2882 |
| 30.5  | 1.4829 | 1.4913 | 1.4444 | 1.4657 | 1.478  | 1.3021 | 1.5045 | 1.2976 |
| 30.75 | 1.4823 | 1.4923 | 1.4446 | 1.4642 | 1.4776 | 1.3088 | 1.5029 | 1.3064 |
| 31    | 1.4825 | 1.4929 | 1.4466 | 1.4648 | 1.478  | 1.3146 | 1.5034 | 1.314  |
| 31.25 | 1.4843 | 1.4939 | 1.448  | 1.465  | 1.479  | 1.3233 | 1.5026 | 1.3219 |
| 31.5  | 1.4842 | 1.496  | 1.4475 | 1.4658 | 1.4786 | 1.3289 | 1.502  | 1.3302 |
| 31.75 | 1.4837 | 1.4956 | 1.4475 | 1.4656 | 1.4792 | 1.3345 | 1.5016 | 1.337  |
| 32    | 1.4837 | 1.4964 | 1.4488 | 1.4634 | 1.4787 | 1.3402 | 1.5012 | 1.3435 |
| 32.25 | 1.4847 | 1.4969 | 1.4483 | 1.4632 | 1.4784 | 1.3457 | 1.5017 | 1.3506 |
| 32.5  | 1.4848 | 1.4964 | 1.448  | 1.4625 | 1.4794 | 1.3513 | 1.501  | 1.3562 |
| 32.75 | 1.4858 | 1.4974 | 1.448  | 1.4632 | 1.4804 | 1.3581 | 1.5021 | 1.3639 |
| 33    | 1.4867 | 1.4992 | 1.4467 | 1.464  | 1.4803 | 1.3644 | 1.5015 | 1.3714 |
| 33.25 | 1.4876 | 1.498  | 1.4476 | 1.4627 | 1.4821 | 1.3681 | 1.5013 | 1.3771 |
| 33.5  | 1.4885 | 1.4993 | 1.4481 | 1.4639 | 1.4834 | 1.3755 | 1.5012 | 1.3833 |
| 33.75 | 1.4883 | 1.4994 | 1.4469 | 1.4634 | 1.4821 | 1.3799 | 1.4994 | 1.39   |
| 34    | 1.4888 | 1.4988 | 1.4474 | 1.4623 | 1.4825 | 1.3833 | 1.4992 | 1.3968 |
| 34.25 | 1.4892 | 1.4995 | 1.4471 | 1.4609 | 1.4829 | 1.3898 | 1.4995 | 1.402  |
| 34.5  | 1.4899 | 1.4996 | 1.4474 | 1.462  | 1.4834 | 1.3959 | 1.4988 | 1.407  |
| 34.75 | 1.4919 | 1.5003 | 1.4472 | 1.4615 | 1.4839 | 1.4002 | 1.499  | 1.412  |
| 35    | 1.492  | 1.5014 | 1.4486 | 1.4615 | 1.4851 | 1.4048 | 1.4982 | 1.4158 |
| 35.25 | 1.4922 | 1.502  | 1.4486 | 1.4619 | 1.4852 | 1.4082 | 1.4976 | 1.4193 |
| 35.5  | 1.4933 | 1.5004 | 1.4477 | 1.4617 | 1.4857 | 1.4127 | 1.4981 | 1.4233 |
| 35.75 | 1.4939 | 1.5019 | 1.4479 | 1.4605 | 1.4859 | 1.4155 | 1.4972 | 1.4252 |
| 36    | 1.4951 | 1.5018 | 1.4476 | 1.4605 | 1.4879 | 1.4199 | 1.4973 | 1.4269 |
| 36.25 | 1.4965 | 1.5015 | 1.4469 | 1.4598 | 1.4879 | 1.423  | 1.4967 | 1.4287 |
| 36.5  | 1.4976 | 1.5021 | 1.4473 | 1.4607 | 1.4885 | 1.4262 | 1.4956 | 1.4287 |
| 36.75 | 1.4983 | 1.5037 | 1.4481 | 1.4634 | 1.4928 | 1.4321 | 1.4976 | 1.4317 |
| 37    | 1.4992 | 1.5034 | 1.4477 | 1.4621 | 1.4915 | 1.4331 | 1.4961 | 1.4292 |
| 37.25 | 1.4997 | 1.504  | 1.449  | 1.4606 | 1.4924 | 1.4344 | 1.4959 | 1.4288 |
| 37.5  | 1.5011 | 1.5037 | 1.4489 | 1.4612 | 1.4906 | 1.4362 | 1.4959 | 1.4285 |
| 37.75 | 1.502  | 1.505  | 1.4486 | 1.4604 | 1.4912 | 1.4382 | 1.4969 | 1.4275 |
| 38    | 1.5029 | 1.5047 | 1.4475 | 1.4599 | 1.4915 | 1.4397 | 1.4959 | 1.4258 |
| 38.25 | 1.5029 | 1.5046 | 1.449  | 1.46   | 1.492  | 1.4395 | 1.4948 | 1.4244 |
| 38.5  | 1.504  | 1.505  | 1.4481 | 1.4587 | 1.4932 | 1.441  | 1.4942 | 1.4232 |
| 38.75 | 1.5035 | 1.5042 | 1.448  | 1.4595 | 1.4935 | 1.4412 | 1.494  | 1.4225 |
| 39    | 1.5042 | 1.505  | 1.4488 | 1.4583 | 1.4934 | 1.4418 | 1.4936 | 1.4216 |
| 39.25 | 1.5058 | 1.5049 | 1.4482 | 1.4587 | 1.4935 | 1.4432 | 1.494  | 1.4198 |

|       |        |        |        |        |        |        |        |        |
|-------|--------|--------|--------|--------|--------|--------|--------|--------|
| 39.5  | 1.507  | 1.5052 | 1.4485 | 1.458  | 1.4945 | 1.4445 | 1.495  | 1.4197 |
| 39.75 | 1.5073 | 1.506  | 1.4484 | 1.4577 | 1.4942 | 1.4449 | 1.4939 | 1.4177 |
| 40    | 1.5077 | 1.5062 | 1.4489 | 1.4574 | 1.4942 | 1.4464 | 1.494  | 1.4166 |
| 40.25 | 1.5093 | 1.5063 | 1.4496 | 1.4583 | 1.4965 | 1.4476 | 1.4949 | 1.4168 |
| 40.5  | 1.5096 | 1.506  | 1.4489 | 1.4571 | 1.4952 | 1.4477 | 1.494  | 1.4155 |
| 40.75 | 1.5108 | 1.5059 | 1.4494 | 1.4573 | 1.4942 | 1.4487 | 1.4941 | 1.4155 |
| 41    | 1.5129 | 1.5053 | 1.4485 | 1.4579 | 1.4952 | 1.4493 | 1.4937 | 1.4155 |
| 41.25 | 1.5127 | 1.5048 | 1.4491 | 1.458  | 1.4957 | 1.4495 | 1.4938 | 1.4145 |
| 41.5  | 1.513  | 1.5052 | 1.4495 | 1.4577 | 1.4964 | 1.4503 | 1.4944 | 1.4143 |
| 41.75 | 1.513  | 1.5045 | 1.4496 | 1.4556 | 1.4967 | 1.4515 | 1.4935 | 1.4142 |
| 42    | 1.5143 | 1.506  | 1.4492 | 1.4548 | 1.4966 | 1.4516 | 1.4942 | 1.4141 |
| 42.25 | 1.5164 | 1.506  | 1.4512 | 1.456  | 1.4974 | 1.4522 | 1.4942 | 1.4145 |
| 42.5  | 1.5166 | 1.5062 | 1.4516 | 1.4567 | 1.4997 | 1.4516 | 1.4952 | 1.4139 |
| 42.75 | 1.518  | 1.506  | 1.4518 | 1.4551 | 1.4979 | 1.4522 | 1.494  | 1.4138 |
| 43    | 1.5154 | 1.5053 | 1.4522 | 1.4572 | 1.4988 | 1.454  | 1.4945 | 1.4145 |
| 43.25 | 1.5129 | 1.5059 | 1.4522 | 1.457  | 1.4997 | 1.4542 | 1.4935 | 1.4142 |
| 43.5  | 1.5111 | 1.5064 | 1.4527 | 1.4576 | 1.4978 | 1.4553 | 1.494  | 1.4148 |
| 43.75 | 1.5114 | 1.5084 | 1.453  | 1.4582 | 1.4988 | 1.4557 | 1.4945 | 1.4155 |
| 44    | 1.5125 | 1.5078 | 1.4529 | 1.4585 | 1.5004 | 1.4562 | 1.4943 | 1.4153 |
| 44.25 | 1.5102 | 1.5073 | 1.4529 | 1.4578 | 1.5006 | 1.4571 | 1.4935 | 1.416  |
| 44.5  | 1.5105 | 1.5065 | 1.4523 | 1.458  | 1.4987 | 1.4573 | 1.4946 | 1.4156 |
| 44.75 | 1.5104 | 1.5065 | 1.454  | 1.4576 | 1.5002 | 1.4587 | 1.4955 | 1.4162 |
| 45    | 1.5092 | 1.5064 | 1.4543 | 1.4584 | 1.4989 | 1.4583 | 1.4947 | 1.4162 |
| 45.25 | 1.5105 | 1.5057 | 1.4541 | 1.4584 | 1.4996 | 1.4594 | 1.4961 | 1.4162 |
| 45.5  | 1.5103 | 1.5065 | 1.4557 | 1.4586 | 1.4999 | 1.4602 | 1.4957 | 1.4168 |
| 45.75 | 1.51   | 1.5067 | 1.4559 | 1.4594 | 1.5014 | 1.4594 | 1.496  | 1.4168 |
| 46    | 1.5108 | 1.5061 | 1.4561 | 1.458  | 1.5012 | 1.4601 | 1.4962 | 1.4193 |
| 46.25 | 1.5109 | 1.5064 | 1.456  | 1.4586 | 1.5005 | 1.4611 | 1.4967 | 1.4189 |
| 46.5  | 1.511  | 1.5069 | 1.4571 | 1.4589 | 1.502  | 1.4624 | 1.4974 | 1.4194 |
| 46.75 | 1.511  | 1.5052 | 1.4577 | 1.4584 | 1.5006 | 1.4615 | 1.4967 | 1.4193 |
| 47    | 1.5111 | 1.5059 | 1.4574 | 1.458  | 1.5017 | 1.4632 | 1.4968 | 1.42   |
| 47.25 | 1.5102 | 1.5042 | 1.4571 | 1.4592 | 1.5015 | 1.4624 | 1.4968 | 1.4206 |
| 47.5  | 1.5112 | 1.5044 | 1.4583 | 1.4596 | 1.5017 | 1.4631 | 1.4973 | 1.4202 |
| 47.75 | 1.5109 | 1.5036 | 1.4575 | 1.459  | 1.5018 | 1.4632 | 1.4977 | 1.4207 |
| 48    | 1.511  | 1.5046 | 1.4582 | 1.4587 | 1.5    | 1.4646 | 1.4967 | 1.4213 |
| 48.25 | 1.511  | 1.5042 | 1.4587 | 1.4587 | 1.5004 | 1.465  | 1.4982 | 1.4219 |
| 48.5  | 1.5111 | 1.504  | 1.4592 | 1.4593 | 1.4999 | 1.4645 | 1.4986 | 1.422  |
| 48.75 | 1.5107 | 1.5019 | 1.4578 | 1.4591 | 1.5013 | 1.4644 | 1.4991 | 1.4221 |
| 49    | 1.5112 | 1.5026 | 1.4586 | 1.4581 | 1.5025 | 1.4657 | 1.499  | 1.4236 |
| 49.25 | 1.5109 | 1.5034 | 1.4604 | 1.4576 | 1.5019 | 1.4654 | 1.4988 | 1.4221 |
| 49.5  | 1.5094 | 1.504  | 1.4603 | 1.4577 | 1.5022 | 1.4674 | 1.4984 | 1.4227 |
| 49.75 | 1.5105 | 1.5038 | 1.4602 | 1.4592 | 1.5024 | 1.4659 | 1.4996 | 1.4241 |

F14

F15

F16

**RAD 3****RAD 10****RAD 30**

0.1618

0.1581

0.1654

0.1514

0.151

0.158

0.1489

0.148

0.1564

0.1485

0.1489

0.1559

0.1477

0.1475

0.1548

- ◆ WT
- WT (GA 3)
- ▲ WT(RAD 3)
- × NO DRUG
- × GA 3uM
- + NOVO 100
- RAD 3
- GA 7uM
- NOVO 250
- ◆ RAD 10





■ RAD 30



60

|        |        |        |
|--------|--------|--------|
| 0.442  | 0.3577 | 0.3058 |
| 0.4582 | 0.3675 | 0.3129 |
| 0.4761 | 0.3765 | 0.3201 |
| 0.4953 | 0.3851 | 0.3274 |
| 0.514  | 0.3939 | 0.3322 |
| 0.536  | 0.4038 | 0.3382 |
| 0.5563 | 0.4147 | 0.3453 |
| 0.58   | 0.4256 | 0.3537 |
| 0.6066 | 0.4389 | 0.3629 |
| 0.6286 | 0.4544 | 0.3743 |
| 0.6498 | 0.4688 | 0.3867 |
| 0.6695 | 0.4804 | 0.3973 |
| 0.6904 | 0.4926 | 0.4072 |
| 0.7122 | 0.5038 | 0.4177 |
| 0.734  | 0.5165 | 0.428  |
| 0.7546 | 0.528  | 0.4367 |
| 0.7766 | 0.5392 | 0.4444 |
| 0.7964 | 0.5511 | 0.4539 |
| 0.8192 | 0.5642 | 0.4616 |
| 0.8403 | 0.5769 | 0.4709 |
| 0.86   | 0.5889 | 0.4797 |
| 0.8771 | 0.5915 | 0.4687 |
| 0.8924 | 0.5941 | 0.4676 |
| 0.9141 | 0.6073 | 0.4748 |
| 0.9342 | 0.6211 | 0.4839 |
| 0.9521 | 0.6332 | 0.492  |
| 0.971  | 0.6457 | 0.4997 |
| 0.9882 | 0.6575 | 0.5072 |
| 1.0052 | 0.6696 | 0.5136 |
| 1.0216 | 0.6814 | 0.5219 |
| 1.0365 | 0.6942 | 0.5275 |

|        |        |        |
|--------|--------|--------|
| 1.0535 | 0.7064 | 0.5372 |
| 1.0682 | 0.7182 | 0.5433 |
| 1.0814 | 0.7294 | 0.5506 |
| 1.0956 | 0.7407 | 0.5573 |
| 1.1089 | 0.7529 | 0.5643 |
| 1.1212 | 0.7636 | 0.5714 |
| 1.1326 | 0.7742 | 0.5775 |
| 1.1457 | 0.7848 | 0.5841 |
| 1.1584 | 0.7957 | 0.5914 |
| 1.1704 | 0.8048 | 0.5976 |
| 1.1804 | 0.8157 | 0.6052 |
| 1.1909 | 0.8248 | 0.6115 |
| 1.1999 | 0.8335 | 0.6177 |
| 1.2108 | 0.842  | 0.6246 |
| 1.2183 | 0.8497 | 0.6298 |
| 1.2264 | 0.858  | 0.6364 |
| 1.2357 | 0.8665 | 0.6421 |
| 1.2429 | 0.8737 | 0.6473 |
| 1.2534 | 0.8813 | 0.6529 |
| 1.2609 | 0.8888 | 0.6588 |
| 1.2687 | 0.8953 | 0.6645 |
| 1.2758 | 0.9032 | 0.6705 |
| 1.2836 | 0.9092 | 0.6771 |
| 1.2918 | 0.9167 | 0.6815 |
| 1.2991 | 0.9236 | 0.6862 |
| 1.3068 | 0.9301 | 0.6907 |
| 1.312  | 0.9361 | 0.6965 |
| 1.3193 | 0.941  | 0.7001 |
| 1.3254 | 0.9467 | 0.7059 |
| 1.3339 | 0.9552 | 0.7126 |
| 1.342  | 0.9589 | 0.7159 |
| 1.3468 | 0.9652 | 0.7206 |
| 1.3532 | 0.9694 | 0.7246 |
| 1.3591 | 0.974  | 0.7301 |
| 1.3654 | 0.9793 | 0.7333 |
| 1.3714 | 0.9858 | 0.7382 |
| 1.3793 | 0.99   | 0.7431 |
| 1.3851 | 0.9949 | 0.749  |
| 1.3917 | 1.0014 | 0.7533 |
| 1.3975 | 1.0055 | 0.757  |
| 1.4022 | 1.0099 | 0.7626 |
| 1.4092 | 1.0155 | 0.7666 |

|        |        |        |
|--------|--------|--------|
| 1.4152 | 1.0191 | 0.772  |
| 1.4225 | 1.0249 | 0.7753 |
| 1.4264 | 1.0302 | 0.7794 |
| 1.4319 | 1.0358 | 0.7857 |
| 1.4374 | 1.0391 | 0.7909 |
| 1.4443 | 1.0448 | 0.7963 |
| 1.4514 | 1.0498 | 0.7991 |
| 1.456  | 1.0554 | 0.8029 |
| 1.4602 | 1.0605 | 0.8064 |
| 1.4643 | 1.0648 | 0.8116 |
| 1.4683 | 1.0698 | 0.8162 |
| 1.4726 | 1.0745 | 0.8187 |
| 1.4775 | 1.0791 | 0.8229 |
| 1.482  | 1.0847 | 0.8248 |
| 1.4862 | 1.0874 | 0.8297 |
| 1.4904 | 1.0933 | 0.8339 |
| 1.4932 | 1.0993 | 0.8375 |
| 1.4965 | 1.1035 | 0.8408 |
| 1.4994 | 1.1098 | 0.8459 |
| 1.5018 | 1.1148 | 0.8484 |
| 1.5057 | 1.1197 | 0.8518 |
| 1.508  | 1.1241 | 0.854  |
| 1.509  | 1.1297 | 0.8589 |
| 1.5113 | 1.1333 | 0.862  |
| 1.5115 | 1.1403 | 0.8654 |
| 1.5138 | 1.1452 | 0.8685 |
| 1.513  | 1.152  | 0.8707 |
| 1.5143 | 1.158  | 0.8753 |
| 1.515  | 1.1608 | 0.8782 |
| 1.5156 | 1.1673 | 0.8823 |
| 1.5141 | 1.1718 | 0.8843 |
| 1.5164 | 1.18   | 0.8916 |
| 1.5151 | 1.1841 | 0.8921 |
| 1.5152 | 1.1903 | 0.8957 |
| 1.5152 | 1.1953 | 0.8992 |
| 1.5151 | 1.1999 | 0.9015 |
| 1.5153 | 1.203  | 0.9044 |
| 1.5156 | 1.2096 | 0.9057 |
| 1.5147 | 1.2132 | 0.9082 |
| 1.5156 | 1.2191 | 0.9129 |
| 1.5155 | 1.2217 | 0.9183 |
| 1.5153 | 1.2269 | 0.92   |

|        |        |        |
|--------|--------|--------|
| 1.5148 | 1.2326 | 0.9236 |
| 1.5153 | 1.2355 | 0.9262 |
| 1.5156 | 1.2421 | 0.929  |
| 1.5158 | 1.2477 | 0.9328 |
| 1.5146 | 1.2498 | 0.9356 |
| 1.5146 | 1.2551 | 0.9364 |
| 1.5154 | 1.2611 | 0.9405 |
| 1.515  | 1.2671 | 0.9422 |
| 1.5154 | 1.2707 | 0.9487 |
| 1.5156 | 1.2755 | 0.9515 |
| 1.5153 | 1.2811 | 0.9547 |
| 1.5165 | 1.2855 | 0.9583 |
| 1.5164 | 1.2909 | 0.9612 |
| 1.5163 | 1.2942 | 0.9646 |
| 1.5175 | 1.2996 | 0.9668 |
| 1.5174 | 1.3024 | 0.9711 |
| 1.5169 | 1.3068 | 0.9742 |
| 1.5175 | 1.3119 | 0.9764 |
| 1.5164 | 1.3155 | 0.9787 |
| 1.5164 | 1.3205 | 0.9823 |
| 1.5161 | 1.3249 | 0.9853 |
| 1.5165 | 1.33   | 0.9887 |
| 1.5169 | 1.3338 | 0.9909 |
| 1.5158 | 1.3383 | 0.9944 |
| 1.5171 | 1.3416 | 0.9996 |
| 1.5161 | 1.3465 | 1.0011 |
| 1.517  | 1.349  | 1.0068 |
| 1.5164 | 1.3556 | 1.0097 |
| 1.5162 | 1.3586 | 1.0118 |
| 1.5157 | 1.3628 | 1.0152 |
| 1.5169 | 1.3662 | 1.0201 |
| 1.5159 | 1.3704 | 1.0226 |
| 1.5167 | 1.3732 | 1.0257 |
| 1.5162 | 1.3757 | 1.0275 |
| 1.5161 | 1.38   | 1.0292 |
| 1.5164 | 1.3851 | 1.0339 |
| 1.5161 | 1.3886 | 1.0364 |
| 1.5158 | 1.3904 | 1.04   |
| 1.5171 | 1.3939 | 1.0428 |
| 1.516  | 1.397  | 1.0463 |
| 1.5165 | 1.4014 | 1.0495 |
| 1.5164 | 1.4029 | 1.0524 |

CPR 7

|      |        |          |            | O1      | O2     | O3     | O4       |
|------|--------|----------|------------|---------|--------|--------|----------|
| TIME | WT     | WT(GA 3) | WT (RAD 3) | NO DRUG | GA 3uM | GA 7uM | NOVO 100 |
| 0    | 0.1894 | 0.2051   | 0.1892     | 0.1564  | 0.1648 | 0.1487 | 0.2049   |
| 0.25 | 0.1844 | 0.1929   | 0.1812     | 0.1476  | 0.1531 | 0.1389 | 0.206    |
| 0.5  | 0.1833 | 0.1912   | 0.1787     | 0.1455  | 0.1507 | 0.137  | 0.2069   |
| 0.75 | 0.1838 | 0.189    | 0.1758     | 0.1452  | 0.1495 | 0.1369 | 0.2047   |
| 1    | 0.1842 | 0.1877   | 0.1818     | 0.1451  | 0.149  | 0.1359 | 0.2044   |

CPR 7

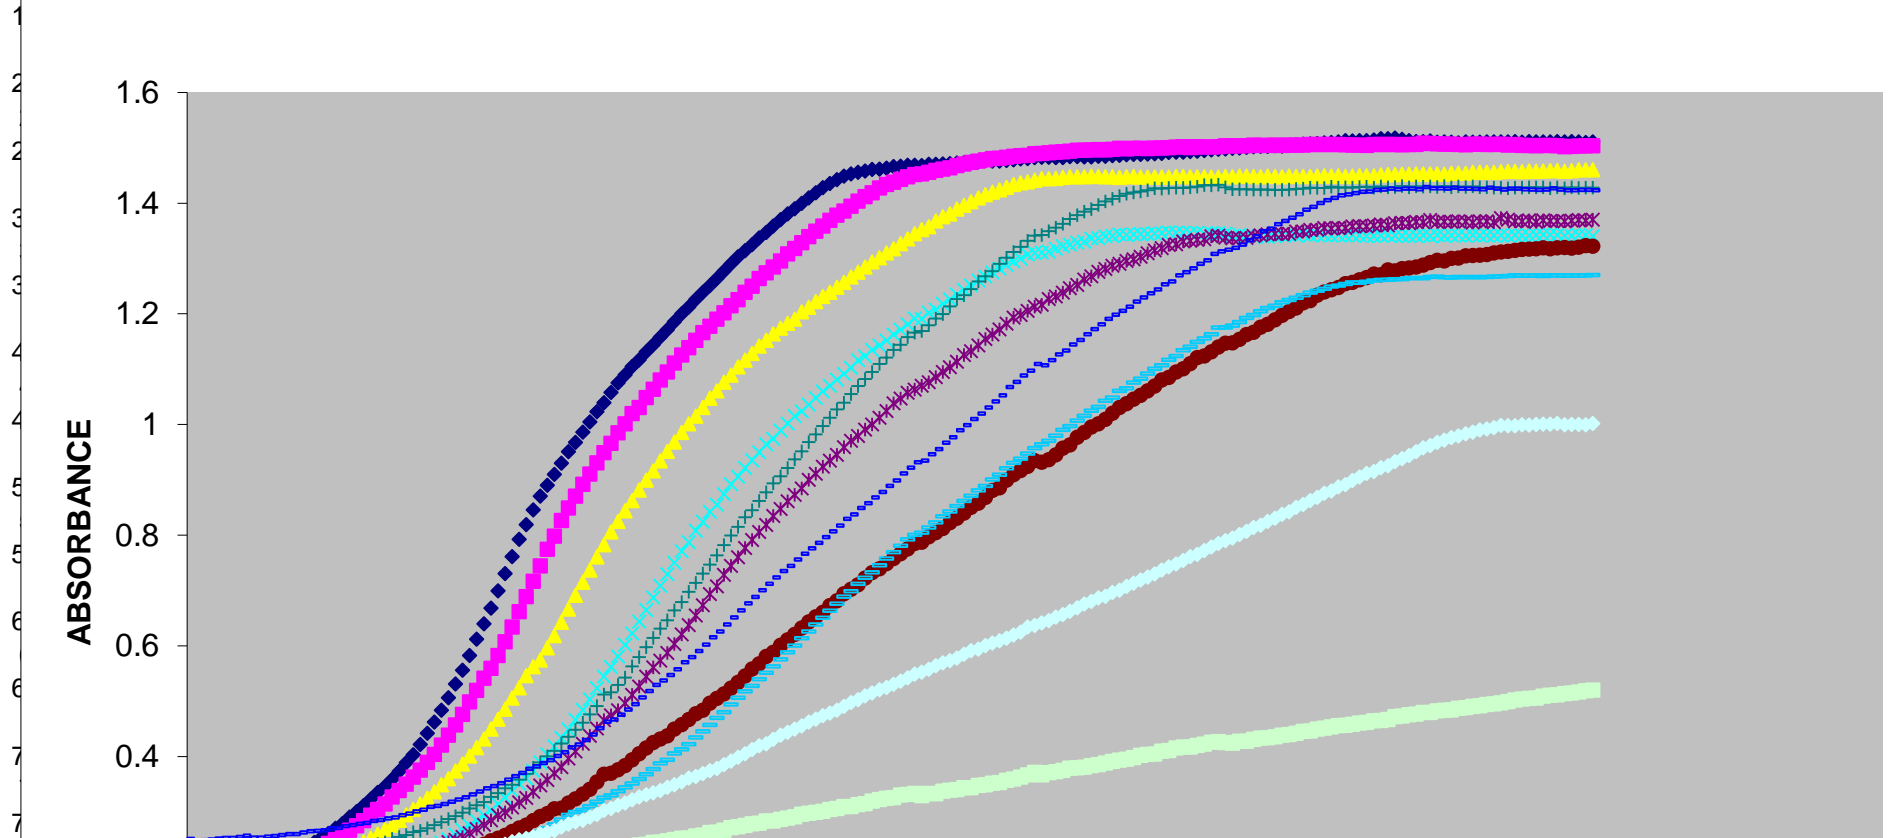

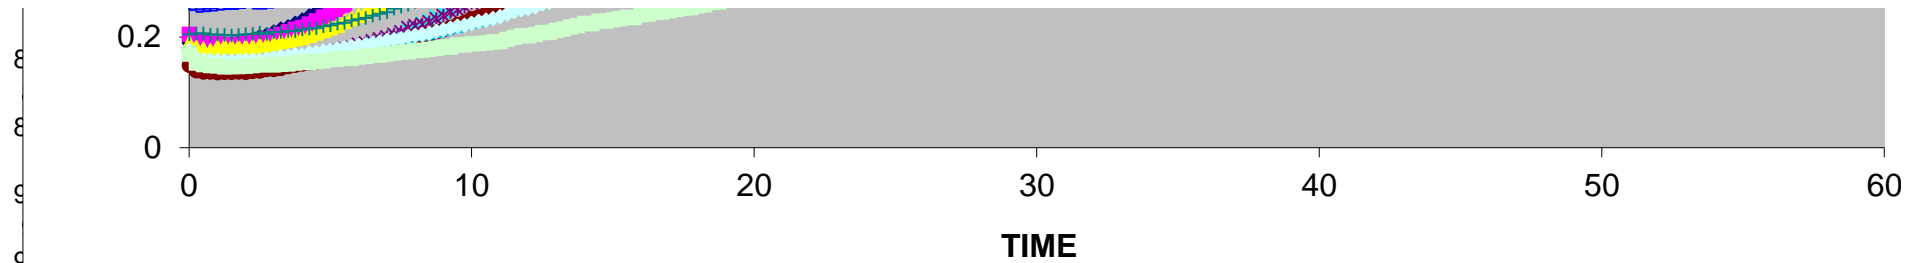

|       |        |        |        |        |        |        |        |
|-------|--------|--------|--------|--------|--------|--------|--------|
| 10.25 | 0.6122 | 0.5197 | 0.416  | 0.2841 | 0.269  | 0.2362 | 0.3118 |
| 10.5  | 0.6397 | 0.5418 | 0.4316 | 0.2937 | 0.277  | 0.2414 | 0.3179 |
| 10.75 | 0.6685 | 0.5593 | 0.4497 | 0.303  | 0.2846 | 0.2479 | 0.3271 |
| 11    | 0.6992 | 0.5825 | 0.4678 | 0.3143 | 0.2941 | 0.2526 | 0.334  |
| 11.25 | 0.7307 | 0.6075 | 0.4857 | 0.3261 | 0.2991 | 0.2574 | 0.3424 |
| 11.5  | 0.7614 | 0.6339 | 0.5059 | 0.3382 | 0.308  | 0.2644 | 0.3489 |
| 11.75 | 0.7927 | 0.6618 | 0.5242 | 0.3508 | 0.3175 | 0.2712 | 0.3585 |
| 12    | 0.8194 | 0.6889 | 0.5464 | 0.3607 | 0.3254 | 0.2763 | 0.3689 |
| 12.25 | 0.8459 | 0.7168 | 0.5622 | 0.3746 | 0.3362 | 0.2841 | 0.3796 |
| 12.5  | 0.8706 | 0.7448 | 0.5743 | 0.3895 | 0.3481 | 0.2919 | 0.3893 |
| 12.75 | 0.8904 | 0.7744 | 0.5968 | 0.4039 | 0.3578 | 0.2969 | 0.4005 |
| 13    | 0.9099 | 0.7982 | 0.6186 | 0.4185 | 0.3699 | 0.3055 | 0.4106 |
| 13.25 | 0.9301 | 0.8269 | 0.6426 | 0.4342 | 0.3811 | 0.3067 | 0.4236 |
| 13.5  | 0.9508 | 0.849  | 0.6665 | 0.4488 | 0.3964 | 0.3163 | 0.4356 |
| 13.75 | 0.9679 | 0.8707 | 0.6913 | 0.4664 | 0.4093 | 0.3234 | 0.4486 |
| 14    | 0.986  | 0.8918 | 0.7152 | 0.4846 | 0.4232 | 0.3321 | 0.461  |
| 14.25 | 1.0047 | 0.9106 | 0.7372 | 0.5033 | 0.4377 | 0.3412 | 0.4763 |
| 14.5  | 1.0233 | 0.9308 | 0.7608 | 0.5239 | 0.4507 | 0.3544 | 0.4915 |
| 14.75 | 1.0397 | 0.9491 | 0.7825 | 0.5445 | 0.4658 | 0.3681 | 0.512  |
| 15    | 1.0577 | 0.966  | 0.8057 | 0.5619 | 0.4744 | 0.3697 | 0.5161 |
| 15.25 | 1.0753 | 0.9853 | 0.8251 | 0.5807 | 0.484  | 0.376  | 0.5293 |
| 15.5  | 1.0897 | 1.0015 | 0.8439 | 0.6018 | 0.4962 | 0.3835 | 0.543  |
| 15.75 | 1.1049 | 1.0198 | 0.8628 | 0.6224 | 0.5113 | 0.3942 | 0.5628 |
| 16    | 1.1171 | 1.031  | 0.8817 | 0.6437 | 0.5265 | 0.4049 | 0.5795 |
| 16.25 | 1.1316 | 1.0487 | 0.8996 | 0.6648 | 0.5447 | 0.4153 | 0.5977 |
| 16.5  | 1.1443 | 1.0637 | 0.9165 | 0.6871 | 0.561  | 0.4252 | 0.6144 |
| 16.75 | 1.1579 | 1.0806 | 0.9342 | 0.7085 | 0.5736 | 0.4315 | 0.6311 |
| 17    | 1.1715 | 1.0952 | 0.9517 | 0.7297 | 0.5875 | 0.4377 | 0.6465 |
| 17.25 | 1.1858 | 1.1114 | 0.9682 | 0.7501 | 0.6037 | 0.4494 | 0.6639 |
| 17.5  | 1.2004 | 1.1256 | 0.9855 | 0.771  | 0.621  | 0.4579 | 0.6792 |
| 17.75 | 1.2123 | 1.1388 | 1.0016 | 0.7874 | 0.6376 | 0.467  | 0.6978 |
| 18    | 1.2261 | 1.1522 | 1.015  | 0.8079 | 0.6552 | 0.4776 | 0.7138 |
| 18.25 | 1.239  | 1.1664 | 1.0307 | 0.8241 | 0.6734 | 0.4835 | 0.7306 |

|       |        |        |        |        |        |        |        |
|-------|--------|--------|--------|--------|--------|--------|--------|
| 18.5  | 1.251  | 1.1779 | 1.0478 | 0.8425 | 0.6938 | 0.4963 | 0.7466 |
| 18.75 | 1.2641 | 1.1907 | 1.0607 | 0.8551 | 0.7074 | 0.5054 | 0.7636 |
| 19    | 1.2773 | 1.2018 | 1.0765 | 0.8739 | 0.7285 | 0.5134 | 0.7822 |
| 19.25 | 1.2907 | 1.2145 | 1.0891 | 0.8919 | 0.7445 | 0.5239 | 0.7995 |
| 19.5  | 1.3032 | 1.2259 | 1.1041 | 0.9059 | 0.7604 | 0.5339 | 0.815  |
| 19.75 | 1.3141 | 1.239  | 1.1166 | 0.9218 | 0.7767 | 0.5454 | 0.8323 |
| 20    | 1.3251 | 1.2497 | 1.1283 | 0.9354 | 0.7915 | 0.5583 | 0.8449 |
| 20.25 | 1.3374 | 1.2637 | 1.1419 | 0.9499 | 0.8056 | 0.5679 | 0.862  |
| 20.5  | 1.3474 | 1.2743 | 1.1521 | 0.9641 | 0.8187 | 0.5809 | 0.8778 |
| 20.75 | 1.3589 | 1.2848 | 1.1637 | 0.9741 | 0.8345 | 0.5883 | 0.8935 |
| 21    | 1.3704 | 1.2956 | 1.1744 | 0.9892 | 0.8473 | 0.6011 | 0.9063 |
| 21.25 | 1.3806 | 1.3083 | 1.1829 | 1.0018 | 0.8613 | 0.6111 | 0.9215 |
| 21.5  | 1.39   | 1.3184 | 1.1906 | 1.015  | 0.8732 | 0.6206 | 0.9372 |
| 21.75 | 1.3999 | 1.3289 | 1.2037 | 1.0239 | 0.8846 | 0.6321 | 0.9516 |
| 22    | 1.4093 | 1.3395 | 1.2116 | 1.0358 | 0.9003 | 0.6431 | 0.9681 |
| 22.25 | 1.4189 | 1.3493 | 1.2223 | 1.0484 | 0.9111 | 0.6527 | 0.982  |
| 22.5  | 1.4278 | 1.3589 | 1.2316 | 1.06   | 0.9239 | 0.6607 | 0.9972 |
| 22.75 | 1.4356 | 1.369  | 1.2391 | 1.0701 | 0.9347 | 0.6728 | 1.0124 |
| 23    | 1.4425 | 1.3781 | 1.2485 | 1.0811 | 0.945  | 0.6813 | 1.0273 |
| 23.25 | 1.4488 | 1.3861 | 1.257  | 1.0915 | 0.9593 | 0.694  | 1.0394 |
| 23.5  | 1.4527 | 1.3947 | 1.2667 | 1.1026 | 0.9706 | 0.7026 | 1.0552 |
| 23.75 | 1.4559 | 1.4037 | 1.2752 | 1.1162 | 0.9795 | 0.7105 | 1.0695 |
| 24    | 1.4583 | 1.4119 | 1.2845 | 1.1236 | 0.9909 | 0.7225 | 1.0823 |
| 24.25 | 1.4609 | 1.4188 | 1.2937 | 1.1347 | 1      | 0.7326 | 1.095  |
| 24.5  | 1.4615 | 1.4276 | 1.3014 | 1.143  | 1.0121 | 0.7391 | 1.1093 |
| 24.75 | 1.4635 | 1.4341 | 1.3101 | 1.1518 | 1.0244 | 0.7487 | 1.1212 |
| 25    | 1.466  | 1.4379 | 1.3177 | 1.1629 | 1.0382 | 0.7577 | 1.1348 |
| 25.25 | 1.4669 | 1.4431 | 1.3269 | 1.1716 | 1.0472 | 0.7668 | 1.1444 |
| 25.5  | 1.4687 | 1.4476 | 1.3358 | 1.1812 | 1.0574 | 0.7755 | 1.1579 |
| 25.75 | 1.4687 | 1.4518 | 1.345  | 1.1916 | 1.0633 | 0.7853 | 1.166  |
| 26    | 1.4682 | 1.453  | 1.3526 | 1.1908 | 1.0702 | 0.7871 | 1.169  |
| 26.25 | 1.4704 | 1.4557 | 1.3577 | 1.2019 | 1.0767 | 0.7974 | 1.1797 |
| 26.5  | 1.4702 | 1.4595 | 1.368  | 1.2079 | 1.0855 | 0.8047 | 1.1913 |
| 26.75 | 1.4706 | 1.4619 | 1.3756 | 1.218  | 1.0948 | 0.8125 | 1.1998 |
| 27    | 1.4716 | 1.4639 | 1.3808 | 1.226  | 1.1036 | 0.8228 | 1.2134 |
| 27.25 | 1.4725 | 1.4677 | 1.3894 | 1.2347 | 1.1135 | 0.8308 | 1.2271 |
| 27.5  | 1.473  | 1.4709 | 1.396  | 1.2434 | 1.1254 | 0.8398 | 1.234  |
| 27.75 | 1.4747 | 1.4735 | 1.4025 | 1.2509 | 1.1328 | 0.8502 | 1.2445 |
| 28    | 1.4747 | 1.4758 | 1.4095 | 1.2605 | 1.1429 | 0.8578 | 1.2584 |
| 28.25 | 1.4772 | 1.4784 | 1.4156 | 1.2676 | 1.1546 | 0.8685 | 1.2677 |
| 28.5  | 1.4758 | 1.4806 | 1.4201 | 1.2749 | 1.1624 | 0.8813 | 1.2773 |
| 28.75 | 1.4763 | 1.4813 | 1.4239 | 1.2817 | 1.1718 | 0.8859 | 1.2904 |

|       |        |        |        |        |        |        |        |
|-------|--------|--------|--------|--------|--------|--------|--------|
| 29    | 1.4771 | 1.4829 | 1.4289 | 1.2888 | 1.1824 | 0.8994 | 1.3013 |
| 29.25 | 1.4786 | 1.485  | 1.4341 | 1.2944 | 1.1932 | 0.9095 | 1.3121 |
| 29.5  | 1.4803 | 1.4861 | 1.4367 | 1.2996 | 1.198  | 0.9168 | 1.3213 |
| 29.75 | 1.4807 | 1.4866 | 1.4387 | 1.3073 | 1.2054 | 0.9246 | 1.3323 |
| 30    | 1.4823 | 1.4892 | 1.4412 | 1.3104 | 1.2129 | 0.9347 | 1.3416 |
| 30.25 | 1.4831 | 1.49   | 1.4444 | 1.3105 | 1.2165 | 0.9318 | 1.3423 |
| 30.5  | 1.4829 | 1.4913 | 1.4444 | 1.3124 | 1.227  | 0.9365 | 1.3495 |
| 30.75 | 1.4823 | 1.4923 | 1.4446 | 1.3178 | 1.2316 | 0.9455 | 1.3556 |
| 31    | 1.4825 | 1.4929 | 1.4466 | 1.322  | 1.2386 | 0.9572 | 1.363  |
| 31.25 | 1.4843 | 1.4939 | 1.448  | 1.325  | 1.2467 | 0.9634 | 1.3716 |
| 31.5  | 1.4842 | 1.496  | 1.4475 | 1.3287 | 1.2521 | 0.9768 | 1.3784 |
| 31.75 | 1.4837 | 1.4956 | 1.4475 | 1.3305 | 1.2624 | 0.9859 | 1.3846 |
| 32    | 1.4837 | 1.4964 | 1.4488 | 1.336  | 1.268  | 0.9954 | 1.3894 |
| 32.25 | 1.4847 | 1.4969 | 1.4483 | 1.337  | 1.2761 | 1.0014 | 1.397  |
| 32.5  | 1.4848 | 1.4964 | 1.448  | 1.3399 | 1.2812 | 1.0094 | 1.4032 |
| 32.75 | 1.4858 | 1.4974 | 1.448  | 1.3407 | 1.2868 | 1.0204 | 1.408  |
| 33    | 1.4867 | 1.4992 | 1.4467 | 1.3435 | 1.2906 | 1.0306 | 1.4128 |
| 33.25 | 1.4876 | 1.498  | 1.4476 | 1.3423 | 1.2954 | 1.0377 | 1.4171 |
| 33.5  | 1.4885 | 1.4993 | 1.4481 | 1.3437 | 1.2988 | 1.0456 | 1.4194 |
| 33.75 | 1.4883 | 1.4994 | 1.4469 | 1.3442 | 1.3031 | 1.0525 | 1.4214 |
| 34    | 1.4888 | 1.4988 | 1.4474 | 1.3443 | 1.3097 | 1.061  | 1.4236 |
| 34.25 | 1.4892 | 1.4995 | 1.4471 | 1.3452 | 1.3147 | 1.0693 | 1.4271 |
| 34.5  | 1.4899 | 1.4996 | 1.4474 | 1.3457 | 1.3188 | 1.0803 | 1.4261 |
| 34.75 | 1.4919 | 1.5003 | 1.4472 | 1.3474 | 1.3243 | 1.0853 | 1.4277 |
| 35    | 1.492  | 1.5014 | 1.4486 | 1.3468 | 1.326  | 1.0952 | 1.4278 |
| 35.25 | 1.4922 | 1.502  | 1.4486 | 1.3465 | 1.3309 | 1.1007 | 1.4277 |
| 35.5  | 1.4933 | 1.5004 | 1.4477 | 1.3457 | 1.3318 | 1.1099 | 1.4287 |
| 35.75 | 1.4939 | 1.5019 | 1.4479 | 1.3467 | 1.3339 | 1.1209 | 1.43   |
| 36    | 1.4951 | 1.5018 | 1.4476 | 1.3446 | 1.3349 | 1.124  | 1.4329 |
| 36.25 | 1.4965 | 1.5015 | 1.4469 | 1.3458 | 1.34   | 1.1316 | 1.4319 |
| 36.5  | 1.4976 | 1.5021 | 1.4473 | 1.346  | 1.3416 | 1.1401 | 1.4333 |
| 36.75 | 1.4983 | 1.5037 | 1.4481 | 1.3453 | 1.3377 | 1.1468 | 1.4288 |
| 37    | 1.4992 | 1.5034 | 1.4477 | 1.3409 | 1.3369 | 1.1478 | 1.4254 |
| 37.25 | 1.4997 | 1.504  | 1.449  | 1.3428 | 1.3367 | 1.154  | 1.4252 |
| 37.5  | 1.5011 | 1.5037 | 1.4489 | 1.34   | 1.3371 | 1.1627 | 1.4252 |
| 37.75 | 1.502  | 1.505  | 1.4486 | 1.3393 | 1.3408 | 1.1669 | 1.4248 |
| 38    | 1.5029 | 1.5047 | 1.4475 | 1.3415 | 1.3419 | 1.1758 | 1.4245 |
| 38.25 | 1.5029 | 1.5046 | 1.449  | 1.3389 | 1.3437 | 1.1813 | 1.4247 |
| 38.5  | 1.504  | 1.505  | 1.4481 | 1.3401 | 1.3446 | 1.1894 | 1.424  |
| 38.75 | 1.5035 | 1.5042 | 1.448  | 1.3426 | 1.3443 | 1.1972 | 1.4241 |
| 39    | 1.5042 | 1.505  | 1.4488 | 1.3423 | 1.345  | 1.2045 | 1.4244 |
| 39.25 | 1.5058 | 1.5049 | 1.4482 | 1.3416 | 1.349  | 1.2107 | 1.4257 |



|       |        |        |        |        |        |        |        |
|-------|--------|--------|--------|--------|--------|--------|--------|
| 39.5  | 1.507  | 1.5052 | 1.4485 | 1.3441 | 1.3487 | 1.2199 | 1.4264 |
| 39.75 | 1.5073 | 1.506  | 1.4484 | 1.3421 | 1.3516 | 1.2238 | 1.4279 |
| 40    | 1.5077 | 1.5062 | 1.4489 | 1.3433 | 1.352  | 1.234  | 1.4277 |
| 40.25 | 1.5093 | 1.5063 | 1.4496 | 1.3423 | 1.355  | 1.2396 | 1.4275 |
| 40.5  | 1.5096 | 1.506  | 1.4489 | 1.3412 | 1.3541 | 1.2434 | 1.4296 |
| 40.75 | 1.5108 | 1.5059 | 1.4494 | 1.3424 | 1.3552 | 1.2474 | 1.4282 |
| 41    | 1.5129 | 1.5053 | 1.4485 | 1.3416 | 1.3551 | 1.2547 | 1.4287 |
| 41.25 | 1.5127 | 1.5048 | 1.4491 | 1.3423 | 1.3583 | 1.2569 | 1.4283 |
| 41.5  | 1.513  | 1.5052 | 1.4495 | 1.3419 | 1.3589 | 1.2616 | 1.4292 |
| 41.75 | 1.513  | 1.5045 | 1.4496 | 1.3408 | 1.3582 | 1.2654 | 1.4296 |
| 42    | 1.5143 | 1.506  | 1.4492 | 1.3409 | 1.3597 | 1.2717 | 1.4282 |
| 42.25 | 1.5164 | 1.506  | 1.4512 | 1.3412 | 1.3618 | 1.2708 | 1.4303 |
| 42.5  | 1.5166 | 1.5062 | 1.4516 | 1.342  | 1.3596 | 1.2796 | 1.4286 |
| 42.75 | 1.518  | 1.506  | 1.4518 | 1.3412 | 1.3637 | 1.2776 | 1.4295 |
| 43    | 1.5154 | 1.5053 | 1.4522 | 1.3409 | 1.3644 | 1.2816 | 1.4309 |
| 43.25 | 1.5129 | 1.5059 | 1.4522 | 1.3406 | 1.3638 | 1.2829 | 1.4284 |
| 43.5  | 1.5111 | 1.5064 | 1.4527 | 1.3416 | 1.3661 | 1.2847 | 1.4304 |
| 43.75 | 1.5114 | 1.5084 | 1.453  | 1.3417 | 1.3658 | 1.2884 | 1.4299 |
| 44    | 1.5125 | 1.5078 | 1.4529 | 1.3408 | 1.3694 | 1.293  | 1.4306 |
| 44.25 | 1.5102 | 1.5073 | 1.4529 | 1.3427 | 1.3662 | 1.2969 | 1.4294 |
| 44.5  | 1.5105 | 1.5065 | 1.4523 | 1.3407 | 1.3666 | 1.2954 | 1.4309 |
| 44.75 | 1.5104 | 1.5065 | 1.454  | 1.3421 | 1.3661 | 1.3004 | 1.4287 |
| 45    | 1.5092 | 1.5064 | 1.4543 | 1.3419 | 1.3672 | 1.3006 | 1.4303 |
| 45.25 | 1.5105 | 1.5057 | 1.4541 | 1.3409 | 1.3666 | 1.305  | 1.4292 |
| 45.5  | 1.5103 | 1.5065 | 1.4557 | 1.3425 | 1.365  | 1.3054 | 1.4305 |
| 45.75 | 1.51   | 1.5067 | 1.4559 | 1.3413 | 1.3675 | 1.306  | 1.4286 |
| 46    | 1.5108 | 1.5061 | 1.4561 | 1.342  | 1.3676 | 1.3075 | 1.4288 |
| 46.25 | 1.5109 | 1.5064 | 1.456  | 1.3415 | 1.3659 | 1.3101 | 1.4283 |
| 46.5  | 1.511  | 1.5069 | 1.4571 | 1.3418 | 1.373  | 1.312  | 1.4278 |
| 46.75 | 1.511  | 1.5052 | 1.4577 | 1.3412 | 1.3705 | 1.3128 | 1.4269 |
| 47    | 1.5111 | 1.5059 | 1.4574 | 1.3426 | 1.3676 | 1.3147 | 1.428  |
| 47.25 | 1.5102 | 1.5042 | 1.4571 | 1.3411 | 1.3672 | 1.3162 | 1.4283 |
| 47.5  | 1.5112 | 1.5044 | 1.4583 | 1.3413 | 1.3691 | 1.3173 | 1.4284 |
| 47.75 | 1.5109 | 1.5036 | 1.4575 | 1.3423 | 1.366  | 1.3175 | 1.4289 |
| 48    | 1.511  | 1.5046 | 1.4582 | 1.3431 | 1.3691 | 1.3191 | 1.4286 |
| 48.25 | 1.511  | 1.5042 | 1.4587 | 1.3429 | 1.3679 | 1.3177 | 1.4272 |
| 48.5  | 1.5111 | 1.504  | 1.4592 | 1.3425 | 1.3679 | 1.3191 | 1.4286 |
| 48.75 | 1.5107 | 1.5019 | 1.4578 | 1.3413 | 1.3671 | 1.3198 | 1.4269 |
| 49    | 1.5112 | 1.5026 | 1.4586 | 1.341  | 1.3686 | 1.3188 | 1.4287 |
| 49.25 | 1.5109 | 1.5034 | 1.4604 | 1.3427 | 1.3696 | 1.3207 | 1.4275 |
| 49.5  | 1.5094 | 1.504  | 1.4603 | 1.3426 | 1.3686 | 1.3237 | 1.428  |
| 49.75 | 1.5105 | 1.5038 | 1.4602 | 1.3402 | 1.3704 | 1.3221 | 1.4282 |

| O5       | O6     | O7     | O8     |
|----------|--------|--------|--------|
| NOVO 250 | RAD 3  | RAD 10 | RAD 30 |
| 0.2515   | 0.1788 | 0.1764 | 0.1691 |
| 0.248    | 0.1609 | 0.1618 | 0.1528 |
| 0.2488   | 0.1581 | 0.1589 | 0.1503 |
| 0.2501   | 0.1553 | 0.1583 | 0.1486 |
| 0.2510   | 0.1547 | 0.1576 | 0.1477 |
|          | 0.1561 | 0.1573 | 0.1462 |
|          | 0.1548 | 0.1562 | 0.1465 |
|          | 0.1544 | 0.1575 | 0.1464 |
|          | 0.155  | 0.1581 | 0.1473 |
|          | 0.1557 | 0.158  | 0.1485 |
|          | 0.1566 | 0.1583 | 0.1494 |
|          | 0.1572 | 0.1606 | 0.1505 |
|          | 0.1592 | 0.1621 | 0.1497 |
|          | 0.1596 | 0.1643 | 0.1505 |
|          | 0.1602 | 0.1653 | 0.1515 |
|          | 0.1631 | 0.1679 | 0.1528 |
|          | 0.1637 | 0.1677 | 0.1552 |
|          | 0.1651 | 0.1713 | 0.1541 |
|          | 0.1663 | 0.172  | 0.1561 |
|          | 0.1674 | 0.1743 | 0.1573 |
|          | 0.1697 | 0.176  | 0.1595 |
|          | 0.171  | 0.1782 | 0.1598 |
|          | 0.173  | 0.181  | 0.1616 |
|          | 0.1757 | 0.1823 | 0.1618 |
|          | 0.1771 | 0.1848 | 0.164  |
|          | 0.179  | 0.1862 | 0.165  |
|          | 0.1809 | 0.189  | 0.1669 |
|          | 0.1832 | 0.1906 | 0.1677 |
|          | 0.1858 | 0.1939 | 0.1691 |
|          | 0.1871 | 0.1952 | 0.171  |
|          | 0.1911 | 0.1967 | 0.1725 |
|          | 0.1929 | 0.2008 | 0.1733 |

- ◆ WT
- WT(GA 3)
- ▲ WT (RAD 3)
- × NO DRUG
- ✖ GA 3uM
- + NOVO 100
- GA 7uM
- NOVO 250
- RAD 3
- ◆ RAD 10
- RAD 30

|        |        |        |        |
|--------|--------|--------|--------|
|        | 0.1961 | 0.2027 | 0.1756 |
|        | 0.1975 | 0.2042 | 0.1761 |
|        | 0.2    | 0.2067 | 0.178  |
|        | 0.2021 | 0.2104 | 0.1794 |
|        | 0.2058 | 0.2131 | 0.1818 |
|        | 0.2088 | 0.2163 | 0.182  |
|        | 0.2116 | 0.2193 | 0.1851 |
|        | 0.2158 | 0.2212 | 0.186  |
|        | 0.2189 | 0.2246 | 0.1875 |
| 0.3367 | 0.2224 | 0.2281 | 0.1885 |
| 0.3425 | 0.2254 | 0.2302 | 0.1897 |
| 0.3469 | 0.2307 | 0.2335 | 0.1913 |
| 0.352  | 0.2341 | 0.2369 | 0.1918 |
| 0.3581 | 0.2386 | 0.2416 | 0.1956 |
| 0.3645 | 0.2419 | 0.2459 | 0.1992 |
| 0.3705 | 0.2478 | 0.2494 | 0.2022 |
| 0.3777 | 0.2532 | 0.2516 | 0.2023 |
| 0.3827 | 0.2584 | 0.2545 | 0.2045 |
| 0.3883 | 0.264  | 0.2597 | 0.2079 |
| 0.3935 | 0.2702 | 0.2631 | 0.2086 |
| 0.401  | 0.2773 | 0.2662 | 0.2117 |
| 0.4078 | 0.2859 | 0.2727 | 0.2145 |
| 0.4164 | 0.2949 | 0.278  | 0.2185 |
| 0.4217 | 0.2999 | 0.2817 | 0.2205 |
| 0.43   | 0.3035 | 0.2851 | 0.2246 |
| 0.44   | 0.3101 | 0.2909 | 0.2242 |
| 0.4514 | 0.3184 | 0.2952 | 0.2288 |
| 0.4632 | 0.3257 | 0.303  | 0.229  |
| 0.4669 | 0.3297 | 0.306  | 0.2313 |
| 0.4755 | 0.3375 | 0.312  | 0.2331 |
| 0.4852 | 0.3443 | 0.3161 | 0.2357 |
| 0.4949 | 0.3516 | 0.3216 | 0.2352 |
| 0.5069 | 0.3596 | 0.3271 | 0.2405 |
| 0.5182 | 0.3682 | 0.3309 | 0.2417 |
| 0.5296 | 0.3772 | 0.3348 | 0.2448 |
| 0.5375 | 0.3875 | 0.3387 | 0.2453 |
| 0.5472 | 0.3941 | 0.3443 | 0.248  |
| 0.5576 | 0.4055 | 0.3491 | 0.25   |
| 0.5704 | 0.4133 | 0.3542 | 0.2522 |
| 0.5797 | 0.4226 | 0.3609 | 0.253  |
| 0.5907 | 0.4348 | 0.364  | 0.2567 |
| 0.6021 | 0.4455 | 0.3692 | 0.2581 |

|        |        |        |        |
|--------|--------|--------|--------|
| 0.6156 | 0.4573 | 0.3746 | 0.2626 |
| 0.626  | 0.4701 | 0.3783 | 0.2634 |
| 0.6389 | 0.4801 | 0.3852 | 0.2671 |
| 0.6513 | 0.494  | 0.3916 | 0.2718 |
| 0.6639 | 0.5066 | 0.3986 | 0.2734 |
| 0.677  | 0.5177 | 0.405  | 0.2757 |
| 0.6886 | 0.5275 | 0.4128 | 0.2786 |
| 0.7006 | 0.5398 | 0.4193 | 0.2797 |
| 0.7121 | 0.5513 | 0.4233 | 0.2834 |
| 0.7237 | 0.563  | 0.4311 | 0.2836 |
| 0.7354 | 0.5755 | 0.4385 | 0.2866 |
| 0.7446 | 0.5883 | 0.4437 | 0.2889 |
| 0.7564 | 0.6003 | 0.4496 | 0.2913 |
| 0.7665 | 0.614  | 0.4555 | 0.2956 |
| 0.7762 | 0.6262 | 0.4624 | 0.2973 |
| 0.7861 | 0.6388 | 0.4677 | 0.2991 |
| 0.7964 | 0.6506 | 0.474  | 0.3008 |
| 0.807  | 0.6637 | 0.4784 | 0.3046 |
| 0.8173 | 0.6761 | 0.484  | 0.306  |
| 0.8295 | 0.6888 | 0.4909 | 0.3098 |
| 0.8378 | 0.6988 | 0.4974 | 0.3099 |
| 0.8492 | 0.7123 | 0.5029 | 0.3131 |
| 0.8581 | 0.7233 | 0.5097 | 0.3151 |
| 0.8682 | 0.7331 | 0.515  | 0.3194 |
| 0.8782 | 0.7456 | 0.5208 | 0.3227 |
| 0.8893 | 0.7576 | 0.5248 | 0.3246 |
| 0.8992 | 0.7697 | 0.5304 | 0.3258 |
| 0.9115 | 0.7812 | 0.5362 | 0.3306 |
| 0.922  | 0.7923 | 0.5423 | 0.3318 |
| 0.932  | 0.8008 | 0.5489 | 0.3336 |
| 0.9346 | 0.8048 | 0.5526 | 0.3293 |
| 0.9466 | 0.8141 | 0.5578 | 0.3334 |
| 0.9559 | 0.8233 | 0.5639 | 0.3331 |
| 0.9672 | 0.8344 | 0.5691 | 0.3372 |
| 0.9769 | 0.8429 | 0.5735 | 0.3394 |
| 0.9899 | 0.8526 | 0.578  | 0.3406 |
| 0.999  | 0.862  | 0.5852 | 0.3436 |
| 1.0099 | 0.8714 | 0.5914 | 0.3437 |
| 1.0198 | 0.8808 | 0.5945 | 0.3476 |
| 1.0307 | 0.8891 | 0.6003 | 0.3488 |
| 1.0417 | 0.9005 | 0.6051 | 0.3519 |
| 1.0529 | 0.9095 | 0.6091 | 0.3533 |

|        |        |        |        |
|--------|--------|--------|--------|
| 1.0676 | 0.9208 | 0.6137 | 0.3572 |
| 1.0772 | 0.9308 | 0.6199 | 0.3595 |
| 1.0887 | 0.938  | 0.6251 | 0.3631 |
| 1.0975 | 0.9476 | 0.6339 | 0.367  |
| 1.1092 | 0.9571 | 0.6369 | 0.3713 |
| 1.1073 | 0.9644 | 0.6418 | 0.3672 |
| 1.1164 | 0.9706 | 0.6459 | 0.3708 |
| 1.1268 | 0.9802 | 0.652  | 0.3727 |
| 1.134  | 0.9906 | 0.6566 | 0.3749 |
| 1.1448 | 0.997  | 0.6624 | 0.3789 |
| 1.153  | 1.0069 | 0.669  | 0.3799 |
| 1.1634 | 1.0159 | 0.6757 | 0.381  |
| 1.1724 | 1.0249 | 0.6801 | 0.3839 |
| 1.1813 | 1.0317 | 0.6865 | 0.3856 |
| 1.191  | 1.043  | 0.6899 | 0.3885 |
| 1.1985 | 1.049  | 0.6965 | 0.3914 |
| 1.2053 | 1.0607 | 0.7008 | 0.3936 |
| 1.2131 | 1.0657 | 0.7074 | 0.3952 |
| 1.222  | 1.0759 | 0.7134 | 0.3982 |
| 1.2297 | 1.0829 | 0.7191 | 0.4024 |
| 1.2373 | 1.092  | 0.7243 | 0.4041 |
| 1.2442 | 1.101  | 0.7301 | 0.4045 |
| 1.2533 | 1.1069 | 0.7368 | 0.41   |
| 1.2588 | 1.1169 | 0.7429 | 0.4111 |
| 1.2698 | 1.1238 | 0.7479 | 0.4154 |
| 1.2755 | 1.1343 | 0.7546 | 0.417  |
| 1.2823 | 1.1407 | 0.7613 | 0.4175 |
| 1.2906 | 1.1491 | 0.7652 | 0.4202 |
| 1.2968 | 1.1559 | 0.7724 | 0.4226 |
| 1.3082 | 1.1635 | 0.7787 | 0.4257 |
| 1.3129 | 1.1755 | 0.7852 | 0.4269 |
| 1.3158 | 1.1754 | 0.7902 | 0.4255 |
| 1.3192 | 1.1789 | 0.7949 | 0.424  |
| 1.3254 | 1.1852 | 0.801  | 0.4278 |
| 1.3332 | 1.1926 | 0.8068 | 0.4276 |
| 1.3403 | 1.1982 | 0.8139 | 0.4314 |
| 1.3493 | 1.2046 | 0.8179 | 0.4332 |
| 1.3542 | 1.2104 | 0.8249 | 0.434  |
| 1.3624 | 1.2149 | 0.8309 | 0.436  |
| 1.368  | 1.2212 | 0.8375 | 0.4385 |
| 1.3737 | 1.2253 | 0.8424 | 0.44   |
| 1.3799 | 1.229  | 0.8501 | 0.4422 |

|        |        |        |        |
|--------|--------|--------|--------|
| 1.3882 | 1.2337 | 0.8554 | 0.4454 |
| 1.3933 | 1.2384 | 0.8625 | 0.4462 |
| 1.4001 | 1.2416 | 0.8681 | 0.4497 |
| 1.4054 | 1.2453 | 0.8757 | 0.4512 |
| 1.4097 | 1.2493 | 0.8801 | 0.4535 |
| 1.4143 | 1.2512 | 0.8873 | 0.4561 |
| 1.4161 | 1.2543 | 0.8915 | 0.4567 |
| 1.4185 | 1.2568 | 0.8988 | 0.4581 |
| 1.4208 | 1.2566 | 0.9053 | 0.4606 |
| 1.421  | 1.2581 | 0.9115 | 0.4615 |
| 1.4243 | 1.2606 | 0.9151 | 0.4645 |
| 1.4248 | 1.2614 | 0.9221 | 0.4652 |
| 1.4265 | 1.2618 | 0.9258 | 0.4669 |
| 1.4251 | 1.2626 | 0.933  | 0.4724 |
| 1.4262 | 1.2628 | 0.9385 | 0.4732 |
| 1.4264 | 1.2645 | 0.944  | 0.4758 |
| 1.4252 | 1.2648 | 0.951  | 0.4771 |
| 1.4292 | 1.2647 | 0.958  | 0.4799 |
| 1.427  | 1.2666 | 0.9618 | 0.4795 |
| 1.4267 | 1.2671 | 0.9679 | 0.4824 |
| 1.4263 | 1.2662 | 0.9716 | 0.4838 |
| 1.4279 | 1.2654 | 0.9767 | 0.4845 |
| 1.4262 | 1.2669 | 0.9794 | 0.4871 |
| 1.4261 | 1.266  | 0.9835 | 0.4881 |
| 1.4257 | 1.2667 | 0.9861 | 0.4909 |
| 1.4254 | 1.2661 | 0.9905 | 0.4921 |
| 1.4281 | 1.2666 | 0.9918 | 0.4941 |
| 1.4263 | 1.2673 | 0.9944 | 0.4953 |
| 1.4245 | 1.2677 | 0.9984 | 0.4971 |
| 1.4261 | 1.2687 | 0.998  | 0.4996 |
| 1.4264 | 1.2697 | 0.9978 | 0.5022 |
| 1.4253 | 1.2688 | 0.9995 | 0.504  |
| 1.4247 | 1.2693 | 0.9991 | 0.5054 |
| 1.4242 | 1.2697 | 1      | 0.5059 |
| 1.4249 | 1.2687 | 1.0005 | 0.5092 |
| 1.4267 | 1.2697 | 1.0005 | 0.5111 |
| 1.4246 | 1.2699 | 1.002  | 0.5113 |
| 1.4236 | 1.2689 | 0.9998 | 0.514  |
| 1.4233 | 1.2699 | 1.0003 | 0.5149 |
| 1.4242 | 1.269  | 1      | 0.5168 |
| 1.4239 | 1.2694 | 0.9993 | 0.5188 |
| 1.4234 | 1.2705 | 1.0018 | 0.5201 |

|             | <b>G9</b> |                  | <b>G10</b>        |                | <b>G11</b>    |               | <b>G12</b>      |  |
|-------------|-----------|------------------|-------------------|----------------|---------------|---------------|-----------------|--|
| <b>TIME</b> | <b>WT</b> | <b>WT (GA 3)</b> | <b>WT (RAD 3)</b> | <b>NO DRUG</b> | <b>GA 3uM</b> | <b>GA 7uM</b> | <b>NOVO 100</b> |  |
| 0           | 0.1894    | 0.2051           | 0.1892            | 0.1766         | 0.1735        | 0.1593        | 0.1984          |  |
| 0.25        | 0.1844    | 0.1929           | 0.1812            | 0.1657         | 0.1624        | 0.1493        | 0.2002          |  |
| 0.5         | 0.1833    | 0.1912           | 0.1787            | 0.1624         | 0.1576        | 0.1431        | 0.203           |  |
| 0.75        | 0.1838    | 0.189            | 0.1758            | 0.1633         | 0.1574        | 0.1436        | 0.2022          |  |
| 1           | 0.1843    | 0.1877           | 0.1818            | 0.1623         | 0.1576        | 0.1416        | 0.2028          |  |

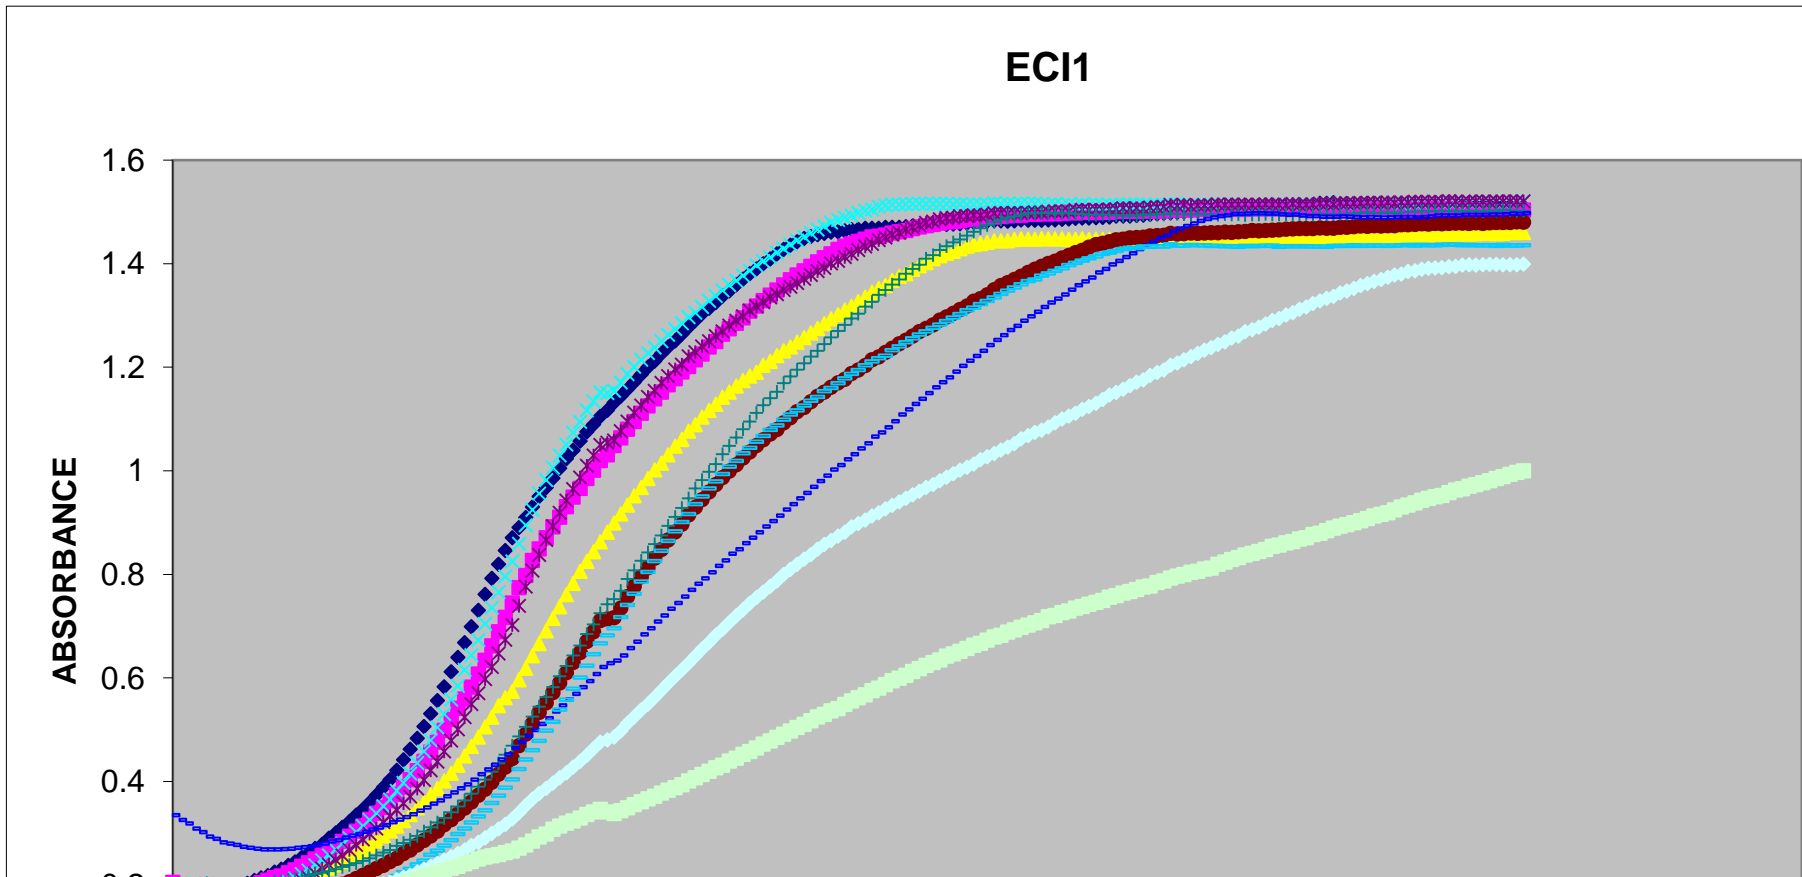

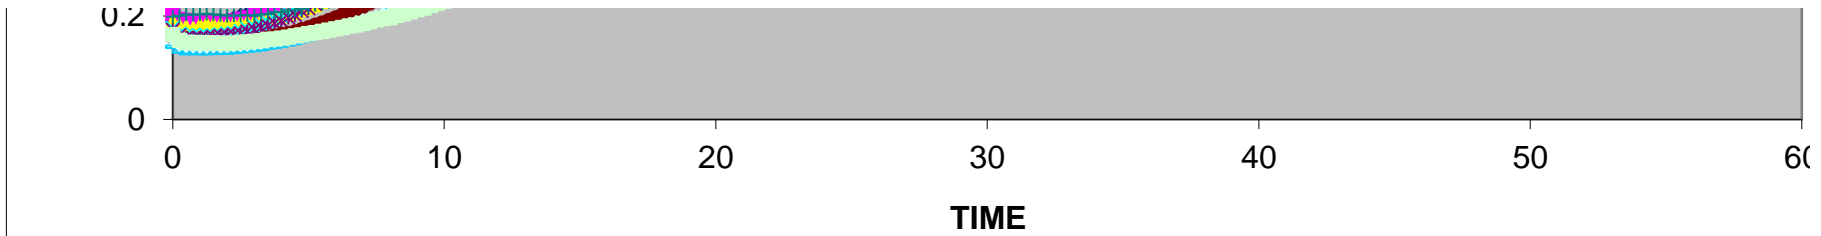

|       |        |        |        |        |        |        |        |
|-------|--------|--------|--------|--------|--------|--------|--------|
| 9.75  | 0.5562 | 0.4763 | 0.3865 | 0.5046 | 0.4381 | 0.3045 | 0.321  |
| 10    | 0.5829 | 0.4986 | 0.4011 | 0.5305 | 0.458  | 0.3167 | 0.3297 |
| 10.25 | 0.6122 | 0.5197 | 0.416  | 0.5585 | 0.4788 | 0.3267 | 0.3405 |
| 10.5  | 0.6397 | 0.5418 | 0.4316 | 0.5846 | 0.5007 | 0.3374 | 0.3518 |
| 10.75 | 0.6685 | 0.5593 | 0.4497 | 0.6155 | 0.5239 | 0.3487 | 0.3634 |
| 11    | 0.6992 | 0.5825 | 0.4678 | 0.6441 | 0.5497 | 0.3606 | 0.3763 |
| 11.25 | 0.7307 | 0.6075 | 0.4857 | 0.6732 | 0.5708 | 0.3733 | 0.39   |
| 11.5  | 0.7614 | 0.6339 | 0.5059 | 0.7044 | 0.5978 | 0.3852 | 0.4036 |
| 11.75 | 0.7927 | 0.6618 | 0.5242 | 0.7357 | 0.6212 | 0.3986 | 0.4194 |
| 12    | 0.8194 | 0.6889 | 0.5464 | 0.7659 | 0.6474 | 0.4141 | 0.4353 |
| 12.25 | 0.8459 | 0.7168 | 0.5622 | 0.7961 | 0.6737 | 0.4278 | 0.452  |
| 12.5  | 0.8706 | 0.7448 | 0.5743 | 0.8253 | 0.7021 | 0.4443 | 0.4694 |
| 12.75 | 0.8904 | 0.7744 | 0.5968 | 0.8592 | 0.739  | 0.4692 | 0.4873 |
| 13    | 0.9099 | 0.7982 | 0.6186 | 0.8952 | 0.7766 | 0.4917 | 0.5057 |
| 13.25 | 0.9301 | 0.8269 | 0.6426 | 0.9245 | 0.8074 | 0.512  | 0.5254 |
| 13.5  | 0.9508 | 0.849  | 0.6665 | 0.9562 | 0.8378 | 0.5334 | 0.5449 |
| 13.75 | 0.9679 | 0.8707 | 0.6913 | 0.9821 | 0.8667 | 0.5522 | 0.5633 |
| 14    | 0.986  | 0.8918 | 0.7152 | 1.0062 | 0.8929 | 0.5717 | 0.5822 |
| 14.25 | 1.0047 | 0.9106 | 0.7372 | 1.0298 | 0.9191 | 0.5906 | 0.6031 |
| 14.5  | 1.0233 | 0.9308 | 0.7608 | 1.051  | 0.9427 | 0.6102 | 0.623  |
| 14.75 | 1.0397 | 0.9491 | 0.7825 | 1.0734 | 0.9648 | 0.6301 | 0.6432 |
| 15    | 1.0577 | 0.966  | 0.8057 | 1.0947 | 0.9872 | 0.6491 | 0.6629 |
| 15.25 | 1.0753 | 0.9853 | 0.8251 | 1.1169 | 1.0099 | 0.6706 | 0.6847 |
| 15.5  | 1.0897 | 1.0015 | 0.8439 | 1.1342 | 1.0297 | 0.6892 | 0.7037 |
| 15.75 | 1.1049 | 1.0198 | 0.8628 | 1.152  | 1.0504 | 0.711  | 0.7253 |
| 16    | 1.1171 | 1.031  | 0.8817 | 1.1505 | 1.0546 | 0.7141 | 0.7424 |
| 16.25 | 1.1316 | 1.0487 | 0.8996 | 1.1545 | 1.0588 | 0.7161 | 0.7523 |
| 16.5  | 1.1443 | 1.0637 | 0.9165 | 1.1708 | 1.0764 | 0.7352 | 0.7686 |
| 16.75 | 1.1579 | 1.0806 | 0.9342 | 1.1867 | 1.0954 | 0.7571 | 0.7909 |
| 17    | 1.1715 | 1.0952 | 0.9517 | 1.2006 | 1.1126 | 0.7772 | 0.8081 |
| 17.25 | 1.1858 | 1.1114 | 0.9682 | 1.2144 | 1.1259 | 0.7954 | 0.8264 |
| 17.5  | 1.2004 | 1.1256 | 0.9855 | 1.2274 | 1.1425 | 0.8127 | 0.8423 |
| 17.75 | 1.2123 | 1.1388 | 1.0016 | 1.2378 | 1.1547 | 0.8311 | 0.8587 |
| 18    | 1.2261 | 1.1522 | 1.015  | 1.2504 | 1.1699 | 0.8478 | 0.8751 |



|       |        |        |        |        |        |        |        |
|-------|--------|--------|--------|--------|--------|--------|--------|
| 18.25 | 1.239  | 1.1664 | 1.0307 | 1.2629 | 1.1828 | 0.8668 | 0.8938 |
| 18.5  | 1.251  | 1.1779 | 1.0478 | 1.2741 | 1.1959 | 0.8822 | 0.9113 |
| 18.75 | 1.2641 | 1.1907 | 1.0607 | 1.2851 | 1.2055 | 0.8968 | 0.9286 |
| 19    | 1.2773 | 1.2018 | 1.0765 | 1.2966 | 1.2213 | 0.9145 | 0.9467 |
| 19.25 | 1.2907 | 1.2145 | 1.0891 | 1.3055 | 1.2295 | 0.9299 | 0.9658 |
| 19.5  | 1.3032 | 1.2259 | 1.1041 | 1.3163 | 1.2405 | 0.9442 | 0.9822 |
| 19.75 | 1.3141 | 1.239  | 1.1166 | 1.3279 | 1.2505 | 0.9595 | 0.9983 |
| 20    | 1.3251 | 1.2497 | 1.1283 | 1.3377 | 1.2602 | 0.9733 | 1.0128 |
| 20.25 | 1.3374 | 1.2637 | 1.1419 | 1.3486 | 1.2696 | 0.9869 | 1.032  |
| 20.5  | 1.3474 | 1.2743 | 1.1521 | 1.3587 | 1.2806 | 0.9995 | 1.048  |
| 20.75 | 1.3589 | 1.2848 | 1.1637 | 1.367  | 1.2896 | 1.0117 | 1.0644 |
| 21    | 1.3704 | 1.2956 | 1.1744 | 1.3768 | 1.2988 | 1.0245 | 1.0801 |
| 21.25 | 1.3806 | 1.3083 | 1.1829 | 1.3861 | 1.3095 | 1.0367 | 1.0954 |
| 21.5  | 1.39   | 1.3184 | 1.1906 | 1.3965 | 1.3175 | 1.0491 | 1.1122 |
| 21.75 | 1.3999 | 1.3289 | 1.2037 | 1.4048 | 1.3258 | 1.0598 | 1.1265 |
| 22    | 1.4093 | 1.3395 | 1.2116 | 1.4121 | 1.3348 | 1.0711 | 1.1402 |
| 22.25 | 1.4189 | 1.3493 | 1.2223 | 1.4215 | 1.3413 | 1.0799 | 1.1529 |
| 22.5  | 1.4278 | 1.3589 | 1.2316 | 1.4289 | 1.3494 | 1.0926 | 1.1692 |
| 22.75 | 1.4356 | 1.369  | 1.2391 | 1.4372 | 1.3551 | 1.1027 | 1.1822 |
| 23    | 1.4425 | 1.3781 | 1.2485 | 1.4448 | 1.3631 | 1.1146 | 1.1951 |
| 23.25 | 1.4488 | 1.3861 | 1.257  | 1.4519 | 1.3709 | 1.1226 | 1.2077 |
| 23.5  | 1.4527 | 1.3947 | 1.2667 | 1.4591 | 1.378  | 1.1338 | 1.2209 |
| 23.75 | 1.4559 | 1.4037 | 1.2752 | 1.4659 | 1.3856 | 1.1442 | 1.2319 |
| 24    | 1.4583 | 1.4119 | 1.2845 | 1.4724 | 1.3921 | 1.1518 | 1.245  |
| 24.25 | 1.4609 | 1.4188 | 1.2937 | 1.4796 | 1.4008 | 1.1611 | 1.2577 |
| 24.5  | 1.4615 | 1.4276 | 1.3014 | 1.4845 | 1.4054 | 1.1702 | 1.2702 |
| 24.75 | 1.4635 | 1.4341 | 1.3101 | 1.4887 | 1.4129 | 1.177  | 1.2817 |
| 25    | 1.466  | 1.4379 | 1.3177 | 1.4931 | 1.4193 | 1.1877 | 1.2945 |
| 25.25 | 1.4669 | 1.4431 | 1.3269 | 1.4982 | 1.4263 | 1.195  | 1.3035 |
| 25.5  | 1.4687 | 1.4476 | 1.3358 | 1.5027 | 1.4332 | 1.2036 | 1.317  |
| 25.75 | 1.4687 | 1.4518 | 1.345  | 1.5051 | 1.438  | 1.2142 | 1.3263 |
| 26    | 1.4682 | 1.453  | 1.3526 | 1.51   | 1.4453 | 1.2198 | 1.3399 |
| 26.25 | 1.4704 | 1.4557 | 1.3577 | 1.5124 | 1.4505 | 1.2289 | 1.349  |
| 26.5  | 1.4702 | 1.4595 | 1.368  | 1.5139 | 1.4564 | 1.2368 | 1.3599 |
| 26.75 | 1.4706 | 1.4619 | 1.3756 | 1.5143 | 1.4601 | 1.2453 | 1.3699 |
| 27    | 1.4716 | 1.4639 | 1.3808 | 1.5149 | 1.4658 | 1.2524 | 1.3808 |
| 27.25 | 1.4725 | 1.4677 | 1.3894 | 1.5153 | 1.4705 | 1.2602 | 1.3898 |
| 27.5  | 1.473  | 1.4709 | 1.396  | 1.5158 | 1.4738 | 1.2686 | 1.398  |
| 27.75 | 1.4747 | 1.4735 | 1.4025 | 1.5153 | 1.4788 | 1.2748 | 1.4096 |
| 28    | 1.4747 | 1.4758 | 1.4095 | 1.5154 | 1.4816 | 1.2817 | 1.4164 |
| 28.25 | 1.4772 | 1.4784 | 1.4156 | 1.5154 | 1.4856 | 1.2909 | 1.4265 |
| 28.5  | 1.4758 | 1.4806 | 1.4201 | 1.5153 | 1.4882 | 1.297  | 1.4338 |

|       |        |        |        |        |        |        |        |
|-------|--------|--------|--------|--------|--------|--------|--------|
| 28.75 | 1.4763 | 1.4813 | 1.4239 | 1.5139 | 1.4887 | 1.3041 | 1.4412 |
| 29    | 1.4771 | 1.4829 | 1.4289 | 1.5146 | 1.4919 | 1.3117 | 1.4471 |
| 29.25 | 1.4786 | 1.485  | 1.4341 | 1.5139 | 1.4918 | 1.3185 | 1.4543 |
| 29.5  | 1.4803 | 1.4861 | 1.4367 | 1.514  | 1.494  | 1.3275 | 1.4618 |
| 29.75 | 1.4807 | 1.4866 | 1.4387 | 1.5138 | 1.493  | 1.3327 | 1.4682 |
| 30    | 1.4823 | 1.4892 | 1.4412 | 1.5147 | 1.4953 | 1.3402 | 1.4746 |
| 30.25 | 1.4831 | 1.49   | 1.4444 | 1.5164 | 1.4977 | 1.3497 | 1.4809 |
| 30.5  | 1.4829 | 1.4913 | 1.4444 | 1.5155 | 1.4984 | 1.3576 | 1.4854 |
| 30.75 | 1.4823 | 1.4923 | 1.4446 | 1.516  | 1.4972 | 1.3634 | 1.4888 |
| 31    | 1.4825 | 1.4929 | 1.4466 | 1.515  | 1.4979 | 1.3696 | 1.4916 |
| 31.25 | 1.4843 | 1.4939 | 1.448  | 1.5161 | 1.4976 | 1.376  | 1.4947 |
| 31.5  | 1.4842 | 1.496  | 1.4475 | 1.5157 | 1.4984 | 1.3834 | 1.4969 |
| 31.75 | 1.4837 | 1.4956 | 1.4475 | 1.516  | 1.4993 | 1.3895 | 1.4975 |
| 32    | 1.4837 | 1.4964 | 1.4488 | 1.5149 | 1.498  | 1.395  | 1.4978 |
| 32.25 | 1.4847 | 1.4969 | 1.4483 | 1.5134 | 1.5007 | 1.4003 | 1.4979 |
| 32.5  | 1.4848 | 1.4964 | 1.448  | 1.5146 | 1.5014 | 1.4049 | 1.4972 |
| 32.75 | 1.4858 | 1.4974 | 1.448  | 1.5136 | 1.5012 | 1.4109 | 1.498  |
| 33    | 1.4867 | 1.4992 | 1.4467 | 1.5141 | 1.5009 | 1.4157 | 1.4973 |
| 33.25 | 1.4876 | 1.498  | 1.4476 | 1.513  | 1.5034 | 1.4218 | 1.4965 |
| 33.5  | 1.4885 | 1.4993 | 1.4481 | 1.5148 | 1.5043 | 1.4261 | 1.4962 |
| 33.75 | 1.4883 | 1.4994 | 1.4469 | 1.5132 | 1.503  | 1.4319 | 1.4942 |
| 34    | 1.4888 | 1.4988 | 1.4474 | 1.5142 | 1.5042 | 1.4368 | 1.4942 |
| 34.25 | 1.4892 | 1.4995 | 1.4471 | 1.5131 | 1.5035 | 1.4394 | 1.4948 |
| 34.5  | 1.4899 | 1.4996 | 1.4474 | 1.5135 | 1.5051 | 1.4425 | 1.4942 |
| 34.75 | 1.4919 | 1.5003 | 1.4472 | 1.5134 | 1.5053 | 1.4461 | 1.4939 |
| 35    | 1.492  | 1.5014 | 1.4486 | 1.5138 | 1.5071 | 1.4475 | 1.4927 |
| 35.25 | 1.4922 | 1.502  | 1.4486 | 1.5145 | 1.5059 | 1.4502 | 1.4931 |
| 35.5  | 1.4933 | 1.5004 | 1.4477 | 1.5141 | 1.5071 | 1.4504 | 1.4928 |
| 35.75 | 1.4939 | 1.5019 | 1.4479 | 1.5139 | 1.5063 | 1.451  | 1.4953 |
| 36    | 1.4951 | 1.5018 | 1.4476 | 1.5132 | 1.5084 | 1.4538 | 1.4936 |
| 36.25 | 1.4965 | 1.5015 | 1.4469 | 1.5134 | 1.5091 | 1.4545 | 1.4955 |
| 36.5  | 1.4976 | 1.5021 | 1.4473 | 1.5133 | 1.5098 | 1.455  | 1.4953 |
| 36.75 | 1.4983 | 1.5037 | 1.4481 | 1.5157 | 1.5137 | 1.4588 | 1.4972 |
| 37    | 1.4992 | 1.5034 | 1.4477 | 1.5153 | 1.512  | 1.4572 | 1.4964 |
| 37.25 | 1.4997 | 1.504  | 1.449  | 1.5141 | 1.5138 | 1.4579 | 1.4954 |
| 37.5  | 1.5011 | 1.5037 | 1.4489 | 1.5138 | 1.5111 | 1.4595 | 1.4953 |
| 37.75 | 1.502  | 1.505  | 1.4486 | 1.5136 | 1.513  | 1.4587 | 1.4957 |
| 38    | 1.5029 | 1.5047 | 1.4475 | 1.5148 | 1.5131 | 1.4591 | 1.4954 |
| 38.25 | 1.5029 | 1.5046 | 1.449  | 1.5144 | 1.5124 | 1.4599 | 1.4949 |
| 38.5  | 1.504  | 1.505  | 1.4481 | 1.5139 | 1.5147 | 1.4601 | 1.4947 |
| 38.75 | 1.5035 | 1.5042 | 1.448  | 1.5141 | 1.5133 | 1.4608 | 1.4955 |
| 39    | 1.5042 | 1.505  | 1.4488 | 1.5145 | 1.5145 | 1.4606 | 1.495  |

|       |        |        |        |        |        |        |        |
|-------|--------|--------|--------|--------|--------|--------|--------|
| 39.25 | 1.5058 | 1.5049 | 1.4482 | 1.514  | 1.5141 | 1.4614 | 1.4954 |
| 39.5  | 1.507  | 1.5052 | 1.4485 | 1.5132 | 1.5143 | 1.4623 | 1.4941 |
| 39.75 | 1.5073 | 1.506  | 1.4484 | 1.513  | 1.5138 | 1.464  | 1.4948 |
| 40    | 1.5077 | 1.5062 | 1.4489 | 1.5136 | 1.514  | 1.4638 | 1.4948 |
| 40.25 | 1.5093 | 1.5063 | 1.4496 | 1.5139 | 1.5148 | 1.4642 | 1.4961 |
| 40.5  | 1.5096 | 1.506  | 1.4489 | 1.514  | 1.5143 | 1.4649 | 1.4951 |
| 40.75 | 1.5108 | 1.5059 | 1.4494 | 1.5149 | 1.5143 | 1.4655 | 1.4953 |
| 41    | 1.5129 | 1.5053 | 1.4485 | 1.5143 | 1.5135 | 1.4665 | 1.495  |
| 41.25 | 1.5127 | 1.5048 | 1.4491 | 1.5142 | 1.5154 | 1.467  | 1.4954 |
| 41.5  | 1.513  | 1.5052 | 1.4495 | 1.5136 | 1.5134 | 1.4678 | 1.4948 |
| 41.75 | 1.513  | 1.5045 | 1.4496 | 1.515  | 1.5144 | 1.4677 | 1.4949 |
| 42    | 1.5143 | 1.506  | 1.4492 | 1.5147 | 1.5147 | 1.4676 | 1.4945 |
| 42.25 | 1.5164 | 1.506  | 1.4512 | 1.5155 | 1.5158 | 1.4689 | 1.4961 |
| 42.5  | 1.5166 | 1.5062 | 1.4516 | 1.5148 | 1.5162 | 1.4685 | 1.4953 |
| 42.75 | 1.518  | 1.506  | 1.4518 | 1.5153 | 1.5149 | 1.4683 | 1.4955 |
| 43    | 1.5154 | 1.5053 | 1.4522 | 1.5165 | 1.5174 | 1.4701 | 1.4964 |
| 43.25 | 1.5129 | 1.5059 | 1.4522 | 1.5155 | 1.5169 | 1.4702 | 1.4962 |
| 43.5  | 1.5111 | 1.5064 | 1.4527 | 1.5162 | 1.5167 | 1.4714 | 1.4971 |
| 43.75 | 1.5114 | 1.5084 | 1.453  | 1.5172 | 1.5171 | 1.4726 | 1.498  |
| 44    | 1.5125 | 1.5078 | 1.4529 | 1.5174 | 1.5179 | 1.4721 | 1.4994 |
| 44.25 | 1.5102 | 1.5073 | 1.4529 | 1.5173 | 1.5181 | 1.4732 | 1.4982 |
| 44.5  | 1.5105 | 1.5065 | 1.4523 | 1.5174 | 1.5174 | 1.4729 | 1.4978 |
| 44.75 | 1.5104 | 1.5065 | 1.454  | 1.5173 | 1.5184 | 1.4735 | 1.4991 |
| 45    | 1.5092 | 1.5064 | 1.4543 | 1.5182 | 1.5173 | 1.4737 | 1.4976 |
| 45.25 | 1.5105 | 1.5057 | 1.4541 | 1.516  | 1.5187 | 1.4753 | 1.4996 |
| 45.5  | 1.5103 | 1.5065 | 1.4557 | 1.5174 | 1.518  | 1.4753 | 1.5    |
| 45.75 | 1.51   | 1.5067 | 1.4559 | 1.5176 | 1.52   | 1.476  | 1.5005 |
| 46    | 1.5108 | 1.5061 | 1.4561 | 1.5181 | 1.5199 | 1.4769 | 1.5004 |
| 46.25 | 1.5109 | 1.5064 | 1.456  | 1.519  | 1.5192 | 1.4763 | 1.5014 |
| 46.5  | 1.511  | 1.5069 | 1.4571 | 1.5189 | 1.52   | 1.478  | 1.5017 |
| 46.75 | 1.511  | 1.5052 | 1.4577 | 1.5182 | 1.5189 | 1.477  | 1.5013 |
| 47    | 1.5111 | 1.5059 | 1.4574 | 1.5193 | 1.5207 | 1.4776 | 1.501  |
| 47.25 | 1.5102 | 1.5042 | 1.4571 | 1.5187 | 1.5202 | 1.4782 | 1.502  |
| 47.5  | 1.5112 | 1.5044 | 1.4583 | 1.5187 | 1.5188 | 1.4783 | 1.5015 |
| 47.75 | 1.5109 | 1.5036 | 1.4575 | 1.518  | 1.5197 | 1.4777 | 1.5021 |
| 48    | 1.511  | 1.5046 | 1.4582 | 1.5189 | 1.5203 | 1.4791 | 1.5017 |
| 48.25 | 1.511  | 1.5042 | 1.4587 | 1.5198 | 1.5204 | 1.478  | 1.5015 |
| 48.5  | 1.5111 | 1.504  | 1.4592 | 1.5193 | 1.5193 | 1.4792 | 1.5023 |
| 48.75 | 1.5107 | 1.5019 | 1.4578 | 1.5194 | 1.5203 | 1.4795 | 1.5016 |
| 49    | 1.5112 | 1.5026 | 1.4586 | 1.5191 | 1.5202 | 1.4794 | 1.5034 |
| 49.25 | 1.5109 | 1.5034 | 1.4604 | 1.5196 | 1.5205 | 1.4799 | 1.5031 |
| 49.5  | 1.5094 | 1.504  | 1.4603 | 1.5205 | 1.5202 | 1.4809 | 1.5019 |

49.75      1.5105      1.5038      1.4602      1.5207      1.5205      1.4801      1.5023

|  | <b>G13</b>      | <b>G14</b>   | <b>G15</b>    | <b>G16</b>    |
|--|-----------------|--------------|---------------|---------------|
|  | <b>NOVO 250</b> | <b>RAD 3</b> | <b>RAD 10</b> | <b>RAD 30</b> |
|  | 0.3354          | 0.1402       | 0.1556        | 0.1637        |
|  | 0.326           | 0.131        | 0.1452        | 0.1531        |
|  | 0.3188          | 0.1278       | 0.1429        | 0.1494        |
|  | 0.3091          | 0.1285       | 0.1421        | 0.1484        |
|  | 0.3024          | 0.128        | 0.1415        | 0.1482        |
|  |                 | 0.1279       | 0.1419        | 0.1482        |
|  |                 | 0.1285       | 0.1421        | 0.1478        |
|  |                 | 0.129        | 0.1424        | 0.1475        |
|  |                 | 0.1294       | 0.143         | 0.1468        |
|  |                 | 0.1305       | 0.144         | 0.1476        |
|  |                 | 0.1316       | 0.1449        | 0.1488        |
|  |                 | 0.1332       | 0.1455        | 0.15          |
|  |                 | 0.1341       | 0.1475        | 0.151         |
|  |                 | 0.1361       | 0.1492        | 0.1523        |
|  |                 | 0.1384       | 0.1509        | 0.1544        |
|  |                 | 0.1404       | 0.1525        | 0.1554        |
|  |                 | 0.1429       | 0.1546        | 0.1571        |
|  |                 | 0.1453       | 0.1562        | 0.1589        |
|  |                 | 0.148        | 0.1593        | 0.1612        |
|  |                 | 0.1516       | 0.1611        | 0.1635        |
|  |                 | 0.1548       | 0.1647        | 0.1658        |
|  |                 | 0.1589       | 0.1672        | 0.1677        |
|  |                 | 0.1614       | 0.17          | 0.1702        |
|  |                 | 0.1663       | 0.1727        | 0.1725        |
|  |                 | 0.1692       | 0.1758        | 0.1752        |
|  |                 | 0.1731       | 0.1793        | 0.1774        |
|  |                 | 0.1777       | 0.1833        | 0.1807        |
|  |                 | 0.1834       | 0.1866        | 0.1825        |
|  |                 | 0.1882       | 0.1904        | 0.1854        |
|  |                 | 0.1928       | 0.1938        | 0.1884        |
|  |                 | 0.1991       | 0.1973        | 0.1922        |

- ◆ WT
- WT (GA 3)
- ▲ WT (RAD 3)
- × NO DRUG
- ✖ GA 3uM
- GA 7uM
- + NOVO 100
- NOVO 250
- RAD 3
- ◆ RAD 10
- RAD 30

J

|        |        |        |        |
|--------|--------|--------|--------|
|        | 0.2051 | 0.2025 | 0.1946 |
|        | 0.2108 | 0.2055 | 0.1968 |
|        | 0.2179 | 0.2105 | 0.2009 |
|        | 0.2251 | 0.2152 | 0.2044 |
|        | 0.2313 | 0.2192 | 0.2075 |
|        | 0.24   | 0.2254 | 0.2119 |
|        | 0.2475 | 0.2304 | 0.215  |
|        | 0.2583 | 0.2362 | 0.2203 |
| 0.3633 | 0.2668 | 0.2417 | 0.2245 |
| 0.3718 | 0.2766 | 0.2485 | 0.2285 |
| 0.3788 | 0.2867 | 0.2548 | 0.2328 |
| 0.3868 | 0.2984 | 0.2608 | 0.2365 |
| 0.3947 | 0.3094 | 0.268  | 0.2411 |
| 0.4034 | 0.321  | 0.2765 | 0.2457 |
| 0.4141 | 0.3327 | 0.2824 | 0.2503 |
| 0.4233 | 0.3446 | 0.2914 | 0.2542 |
| 0.432  | 0.3584 | 0.2998 | 0.2569 |
| 0.4426 | 0.373  | 0.3087 | 0.2591 |
| 0.4526 | 0.3885 | 0.317  | 0.2627 |
| 0.4646 | 0.4042 | 0.3279 | 0.266  |
| 0.4764 | 0.4239 | 0.3403 | 0.2717 |
| 0.4881 | 0.4426 | 0.3535 | 0.2777 |
| 0.4997 | 0.4607 | 0.366  | 0.2851 |
| 0.5112 | 0.4783 | 0.3771 | 0.2932 |
| 0.5226 | 0.4983 | 0.3871 | 0.2988 |
| 0.5355 | 0.5158 | 0.397  | 0.3077 |
| 0.5471 | 0.5389 | 0.4072 | 0.3142 |
| 0.5591 | 0.558  | 0.4167 | 0.3197 |
| 0.5695 | 0.5794 | 0.4278 | 0.3239 |
| 0.5822 | 0.6009 | 0.4387 | 0.3297 |
| 0.5943 | 0.6239 | 0.4505 | 0.3366 |
| 0.6075 | 0.6458 | 0.4639 | 0.341  |
| 0.621  | 0.6669 | 0.476  | 0.3463 |
| 0.6289 | 0.6822 | 0.4806 | 0.341  |
| 0.6336 | 0.6957 | 0.4856 | 0.3382 |
| 0.6437 | 0.7176 | 0.4977 | 0.3438 |
| 0.6576 | 0.741  | 0.5122 | 0.3495 |
| 0.6701 | 0.7625 | 0.5248 | 0.3557 |
| 0.6845 | 0.7862 | 0.5382 | 0.3611 |
| 0.6959 | 0.8049 | 0.5498 | 0.3667 |
| 0.7089 | 0.8256 | 0.5627 | 0.3715 |
| 0.7206 | 0.8456 | 0.5763 | 0.3775 |

|        |        |        |        |
|--------|--------|--------|--------|
| 0.734  | 0.8648 | 0.5895 | 0.3833 |
| 0.745  | 0.8833 | 0.6033 | 0.3884 |
| 0.7572 | 0.9009 | 0.6156 | 0.3936 |
| 0.77   | 0.9168 | 0.6285 | 0.4013 |
| 0.7818 | 0.9356 | 0.6424 | 0.4074 |
| 0.7926 | 0.9507 | 0.6559 | 0.4138 |
| 0.8039 | 0.9661 | 0.6691 | 0.4198 |
| 0.8163 | 0.9797 | 0.6822 | 0.4263 |
| 0.827  | 0.9939 | 0.6944 | 0.4317 |
| 0.8398 | 1.0078 | 0.7073 | 0.4395 |
| 0.8486 | 1.0192 | 0.7198 | 0.4449 |
| 0.8601 | 1.0338 | 0.7316 | 0.4525 |
| 0.871  | 1.0444 | 0.744  | 0.4582 |
| 0.8813 | 1.0564 | 0.7551 | 0.4651 |
| 0.8926 | 1.0673 | 0.7661 | 0.472  |
| 0.9029 | 1.0791 | 0.7772 | 0.4786 |
| 0.9135 | 1.0878 | 0.7877 | 0.4855 |
| 0.9253 | 1.0988 | 0.7997 | 0.4916 |
| 0.9356 | 1.1088 | 0.8097 | 0.4976 |
| 0.9468 | 1.1169 | 0.8198 | 0.5047 |
| 0.9573 | 1.1261 | 0.8295 | 0.5107 |
| 0.969  | 1.1351 | 0.8379 | 0.5173 |
| 0.9804 | 1.1427 | 0.8485 | 0.5247 |
| 0.9907 | 1.154  | 0.8578 | 0.5295 |
| 1.0023 | 1.1603 | 0.8655 | 0.5368 |
| 1.0114 | 1.1691 | 0.8741 | 0.541  |
| 1.0225 | 1.1785 | 0.8813 | 0.5488 |
| 1.0324 | 1.1873 | 0.8916 | 0.556  |
| 1.0435 | 1.195  | 0.8978 | 0.5622 |
| 1.0534 | 1.2037 | 0.9049 | 0.5677 |
| 1.0659 | 1.2116 | 0.9129 | 0.5754 |
| 1.0743 | 1.2174 | 0.919  | 0.5805 |
| 1.0842 | 1.2227 | 0.9264 | 0.587  |
| 1.0961 | 1.233  | 0.9334 | 0.5947 |
| 1.1087 | 1.2402 | 0.9401 | 0.5994 |
| 1.1186 | 1.2483 | 0.9471 | 0.6052 |
| 1.1291 | 1.256  | 0.9534 | 0.6123 |
| 1.1392 | 1.2636 | 0.9608 | 0.6184 |
| 1.1505 | 1.2695 | 0.968  | 0.6246 |
| 1.1613 | 1.2765 | 0.9737 | 0.6298 |
| 1.1713 | 1.2826 | 0.9809 | 0.6351 |
| 1.1802 | 1.2894 | 0.9876 | 0.6424 |

|        |        |        |        |
|--------|--------|--------|--------|
| 1.1918 | 1.2958 | 0.9946 | 0.6466 |
| 1.2029 | 1.303  | 1.0015 | 0.6516 |
| 1.2124 | 1.3105 | 1.007  | 0.6571 |
| 1.2222 | 1.3151 | 1.0128 | 0.6633 |
| 1.2315 | 1.3222 | 1.0214 | 0.6668 |
| 1.2429 | 1.3282 | 1.0271 | 0.6731 |
| 1.2528 | 1.3348 | 1.0333 | 0.6794 |
| 1.262  | 1.3417 | 1.0405 | 0.6823 |
| 1.2717 | 1.3481 | 1.0459 | 0.6884 |
| 1.2797 | 1.3542 | 1.0525 | 0.6931 |
| 1.2898 | 1.3602 | 1.0619 | 0.6978 |
| 1.2985 | 1.3662 | 1.0681 | 0.7022 |
| 1.3072 | 1.3695 | 1.074  | 0.7062 |
| 1.3167 | 1.3768 | 1.0783 | 0.7106 |
| 1.3251 | 1.3816 | 1.085  | 0.7183 |
| 1.3326 | 1.3865 | 1.0927 | 0.7205 |
| 1.3407 | 1.3914 | 1.1    | 0.7265 |
| 1.3497 | 1.3976 | 1.1056 | 0.7292 |
| 1.3586 | 1.4017 | 1.111  | 0.7351 |
| 1.3656 | 1.406  | 1.1187 | 0.7382 |
| 1.3734 | 1.4103 | 1.1242 | 0.7426 |
| 1.3835 | 1.4138 | 1.1302 | 0.7463 |
| 1.3902 | 1.4188 | 1.1376 | 0.7499 |
| 1.3984 | 1.4218 | 1.1465 | 0.7557 |
| 1.4055 | 1.4246 | 1.1514 | 0.7588 |
| 1.4129 | 1.4282 | 1.1579 | 0.764  |
| 1.4205 | 1.4305 | 1.1647 | 0.7672 |
| 1.4285 | 1.4303 | 1.1712 | 0.771  |
| 1.4353 | 1.4331 | 1.1758 | 0.7759 |
| 1.4423 | 1.4329 | 1.1839 | 0.7776 |
| 1.4492 | 1.4339 | 1.1897 | 0.7844 |
| 1.4551 | 1.4331 | 1.1945 | 0.7872 |
| 1.4628 | 1.4375 | 1.204  | 0.7933 |
| 1.468  | 1.435  | 1.2083 | 0.7965 |
| 1.4725 | 1.4353 | 1.2142 | 0.7998 |
| 1.4777 | 1.4363 | 1.2206 | 0.8039 |
| 1.4826 | 1.4358 | 1.2268 | 0.8062 |
| 1.4863 | 1.436  | 1.2328 | 0.8104 |
| 1.4895 | 1.4343 | 1.2381 | 0.8124 |
| 1.4921 | 1.4343 | 1.244  | 0.8193 |
| 1.4938 | 1.4341 | 1.2494 | 0.8238 |
| 1.4965 | 1.4337 | 1.2565 | 0.829  |



|        |        |        |        |
|--------|--------|--------|--------|
| 1.4965 | 1.4328 | 1.2605 | 0.8325 |
| 1.4971 | 1.4342 | 1.2686 | 0.8378 |
| 1.4974 | 1.4339 | 1.2725 | 0.8409 |
| 1.4973 | 1.4347 | 1.2774 | 0.8445 |
| 1.4966 | 1.4347 | 1.2838 | 0.8478 |
| 1.497  | 1.4349 | 1.2905 | 0.8539 |
| 1.4955 | 1.4326 | 1.2943 | 0.8564 |
| 1.4944 | 1.4338 | 1.3013 | 0.8612 |
| 1.4948 | 1.4338 | 1.3055 | 0.8637 |
| 1.4932 | 1.4339 | 1.312  | 0.8685 |
| 1.4921 | 1.4336 | 1.3162 | 0.8707 |
| 1.4919 | 1.4335 | 1.3231 | 0.8768 |
| 1.4909 | 1.433  | 1.328  | 0.8797 |
| 1.4909 | 1.4328 | 1.3334 | 0.8843 |
| 1.4908 | 1.4342 | 1.3371 | 0.8893 |
| 1.4911 | 1.4344 | 1.3435 | 0.8929 |
| 1.4909 | 1.4346 | 1.3474 | 0.8963 |
| 1.4898 | 1.436  | 1.3521 | 0.8999 |
| 1.4897 | 1.4347 | 1.3576 | 0.9037 |
| 1.4899 | 1.4349 | 1.3616 | 0.9081 |
| 1.4897 | 1.4354 | 1.366  | 0.9128 |
| 1.4891 | 1.4353 | 1.3699 | 0.916  |
| 1.4895 | 1.4347 | 1.374  | 0.9194 |
| 1.4899 | 1.4354 | 1.3784 | 0.9248 |
| 1.4901 | 1.4357 | 1.38   | 0.93   |
| 1.4902 | 1.4365 | 1.3849 | 0.934  |
| 1.4896 | 1.4354 | 1.386  | 0.9385 |
| 1.4902 | 1.4365 | 1.3892 | 0.9431 |
| 1.4914 | 1.4359 | 1.391  | 0.9466 |
| 1.4929 | 1.4359 | 1.3921 | 0.9499 |
| 1.4935 | 1.4362 | 1.3923 | 0.9525 |
| 1.4932 | 1.4368 | 1.3942 | 0.9583 |
| 1.4932 | 1.4371 | 1.3949 | 0.9628 |
| 1.4943 | 1.4355 | 1.3974 | 0.9657 |
| 1.4944 | 1.4365 | 1.3982 | 0.9703 |
| 1.4943 | 1.4359 | 1.3976 | 0.9735 |
| 1.4945 | 1.4355 | 1.3983 | 0.9771 |
| 1.495  | 1.4358 | 1.3985 | 0.981  |
| 1.4948 | 1.4343 | 1.3984 | 0.9855 |
| 1.4959 | 1.4362 | 1.3978 | 0.989  |
| 1.4966 | 1.435  | 1.3981 | 0.993  |
| 1.4964 | 1.4352 | 1.3979 | 0.9972 |

1.4974

1.4357

1.3992

1.0003

GCN 2

|      | H1     |          | H2        |         | H3     |        | H4       |          | H5     |        | H6 |  | H7 |  |
|------|--------|----------|-----------|---------|--------|--------|----------|----------|--------|--------|----|--|----|--|
| TIME | WT     | WT(GA 3) | WT(RAD 3) | NO DRUG | GA 3uM | GA 7uM | NOVO 100 | NOVO 250 | RAD 3  | RAD 10 |    |  |    |  |
| 0    | 0.1894 | 0.2051   | 0.1892    | 0.1416  | 0.1421 | 0.1323 | 0.1725   | 0.2489   | 0.1333 | 0.1324 |    |  |    |  |
| 0.25 | 0.1844 | 0.1929   | 0.1812    | 0.1413  | 0.1404 | 0.1313 | 0.175    | 0.2504   | 0.1318 | 0.1311 |    |  |    |  |
| 0.5  | 0.1833 | 0.1912   | 0.1787    | 0.1401  | 0.1396 | 0.1278 | 0.176    | 0.2517   | 0.1311 | 0.13   |    |  |    |  |
| 0.75 | 0.1838 | 0.189    | 0.1758    | 0.1366  | 0.1366 | 0.1258 | 0.1759   | 0.2507   | 0.1292 | 0.1298 |    |  |    |  |
| 1    | 0.1843 | 0.1877   | 0.1818    | 0.1372  | 0.1386 | 0.1253 | 0.1773   | 0.2546   | 0.129  | 0.1286 |    |  |    |  |
| 1.25 | 0.1867 | 0.1862   | 0.1836    | 0.1377  | 0.1371 | 0.125  | 0.1774   | 0.2569   | 0.1288 | 0.1276 |    |  |    |  |
| 1.5  | 0.188  | 0.186    | 0.1823    | 0.1372  | 0.1369 | 0.1241 | 0.1788   | 0.2552   | 0.1275 | 0.1273 |    |  |    |  |

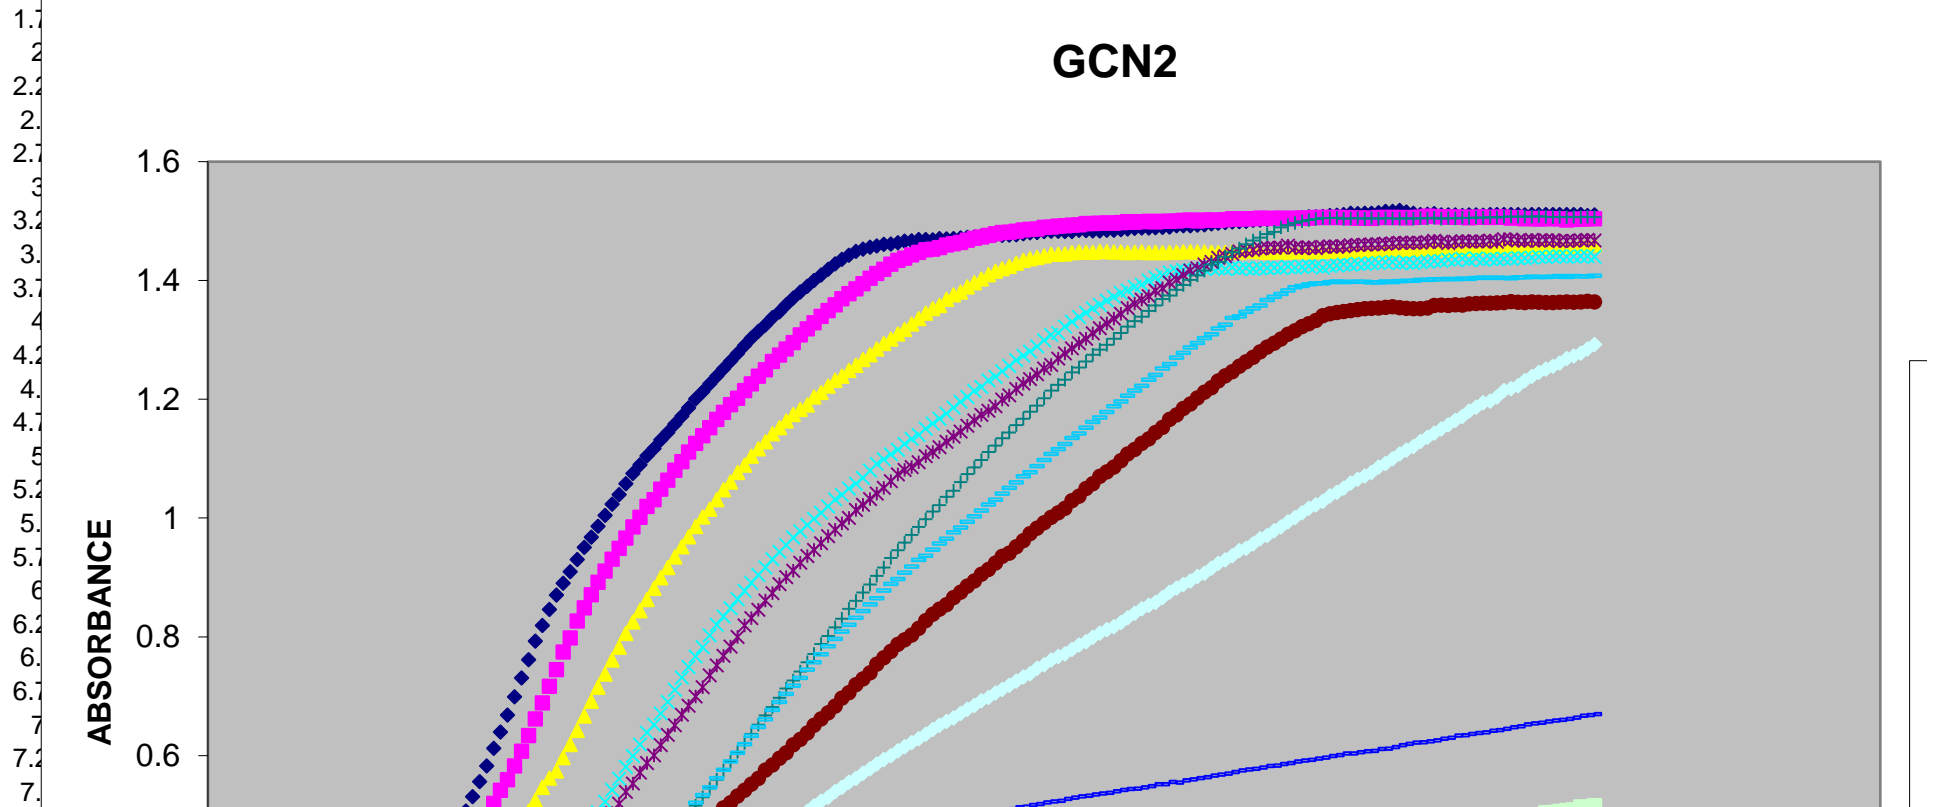

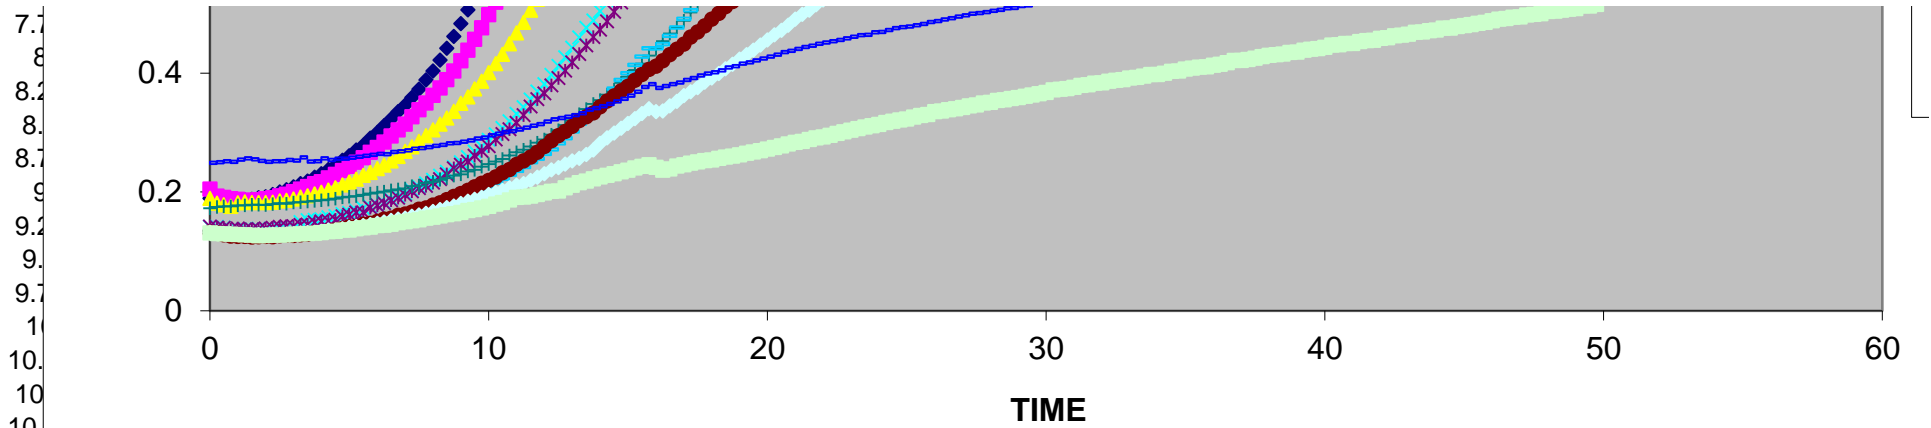

|       |        |        |        |        |        |        |        |        |        |        |
|-------|--------|--------|--------|--------|--------|--------|--------|--------|--------|--------|
| 11.25 | 0.7307 | 0.6075 | 0.4857 | 0.3429 | 0.3297 | 0.2524 | 0.2715 | 0.3086 | 0.2423 | 0.2142 |
| 11.5  | 0.7614 | 0.6339 | 0.5059 | 0.356  | 0.3438 | 0.2589 | 0.2766 | 0.3116 | 0.2505 | 0.2195 |
| 11.75 | 0.7927 | 0.6618 | 0.5242 | 0.3695 | 0.3562 | 0.267  | 0.2829 | 0.3142 | 0.2563 | 0.2249 |
| 12    | 0.8194 | 0.6889 | 0.5464 | 0.3816 | 0.3659 | 0.2764 | 0.2887 | 0.3188 | 0.264  | 0.231  |
| 12.25 | 0.8459 | 0.7168 | 0.5622 | 0.3972 | 0.3796 | 0.2861 | 0.2968 | 0.3222 | 0.2718 | 0.2375 |
| 12.5  | 0.8706 | 0.7448 | 0.5743 | 0.4126 | 0.3919 | 0.2948 | 0.3042 | 0.3248 | 0.2818 | 0.2413 |
| 12.75 | 0.8904 | 0.7744 | 0.5968 | 0.4272 | 0.4041 | 0.3018 | 0.3129 | 0.3268 | 0.2906 | 0.2472 |
| 13    | 0.9099 | 0.7982 | 0.6186 | 0.443  | 0.4185 | 0.3107 | 0.3208 | 0.3293 | 0.3019 | 0.2525 |
| 13.25 | 0.9301 | 0.8269 | 0.6426 | 0.4604 | 0.4326 | 0.3201 | 0.3312 | 0.3326 | 0.3149 | 0.2568 |
| 13.5  | 0.9508 | 0.849  | 0.6665 | 0.4766 | 0.4469 | 0.3265 | 0.3399 | 0.3387 | 0.3238 | 0.2633 |
| 13.75 | 0.9679 | 0.8707 | 0.6913 | 0.4888 | 0.4608 | 0.3332 | 0.3481 | 0.3415 | 0.3334 | 0.2708 |
| 14    | 0.986  | 0.8918 | 0.7152 | 0.5046 | 0.4731 | 0.3434 | 0.355  | 0.3447 | 0.344  | 0.2821 |
| 14.25 | 1.0047 | 0.9106 | 0.7372 | 0.5225 | 0.4872 | 0.3531 | 0.3637 | 0.3481 | 0.3577 | 0.291  |
| 14.5  | 1.0233 | 0.9308 | 0.7608 | 0.542  | 0.5037 | 0.362  | 0.3724 | 0.3527 | 0.3741 | 0.2995 |
| 14.75 | 1.0397 | 0.9491 | 0.7825 | 0.5613 | 0.5192 | 0.3705 | 0.3839 | 0.357  | 0.3888 | 0.3074 |
| 15    | 1.0577 | 0.966  | 0.8057 | 0.5809 | 0.539  | 0.3779 | 0.3942 | 0.3621 | 0.4001 | 0.3153 |
| 15.25 | 1.0753 | 0.9853 | 0.8251 | 0.5992 | 0.553  | 0.3883 | 0.4055 | 0.3689 | 0.414  | 0.3233 |
| 15.5  | 1.0897 | 1.0015 | 0.8439 | 0.619  | 0.5713 | 0.3978 | 0.4162 | 0.3767 | 0.4279 | 0.3323 |
| 15.75 | 1.1049 | 1.0198 | 0.8628 | 0.6388 | 0.5874 | 0.4065 | 0.4298 | 0.3817 | 0.4423 | 0.3404 |
| 16    | 1.1171 | 1.031  | 0.8817 | 0.6523 | 0.6004 | 0.412  | 0.4408 | 0.3753 | 0.4423 | 0.3353 |
| 16.25 | 1.1316 | 1.0487 | 0.8996 | 0.6712 | 0.6179 | 0.4208 | 0.4538 | 0.3786 | 0.4491 | 0.3365 |
| 16.5  | 1.1443 | 1.0637 | 0.9165 | 0.6903 | 0.6348 | 0.4313 | 0.467  | 0.3817 | 0.4631 | 0.3448 |
| 16.75 | 1.1579 | 1.0806 | 0.9342 | 0.7107 | 0.6513 | 0.4406 | 0.4768 | 0.3845 | 0.4771 | 0.3526 |
| 17    | 1.1715 | 1.0952 | 0.9517 | 0.7311 | 0.6688 | 0.4488 | 0.4885 | 0.3889 | 0.4916 | 0.3621 |
| 17.25 | 1.1858 | 1.1114 | 0.9682 | 0.749  | 0.6842 | 0.4611 | 0.5024 | 0.3918 | 0.5062 | 0.3685 |
| 17.5  | 1.2004 | 1.1256 | 0.9855 | 0.7667 | 0.6993 | 0.4694 | 0.516  | 0.3961 | 0.5209 | 0.376  |
| 17.75 | 1.2123 | 1.1388 | 1.0016 | 0.7826 | 0.715  | 0.48   | 0.53   | 0.3993 | 0.5337 | 0.3851 |
| 18    | 1.2261 | 1.1522 | 1.015  | 0.8023 | 0.7351 | 0.491  | 0.5448 | 0.4015 | 0.5467 | 0.3918 |

|       |        |        |        |        |        |        |        |        |        |        |
|-------|--------|--------|--------|--------|--------|--------|--------|--------|--------|--------|
| 18.25 | 1.239  | 1.1664 | 1.0307 | 0.8204 | 0.752  | 0.5007 | 0.5596 | 0.4046 | 0.5621 | 0.3995 |
| 18.5  | 1.251  | 1.1779 | 1.0478 | 0.834  | 0.7681 | 0.5123 | 0.5752 | 0.4095 | 0.576  | 0.4076 |
| 18.75 | 1.2641 | 1.1907 | 1.0607 | 0.8485 | 0.7838 | 0.5207 | 0.5899 | 0.4121 | 0.5902 | 0.4152 |
| 19    | 1.2773 | 1.2018 | 1.0765 | 0.8634 | 0.7997 | 0.5322 | 0.6062 | 0.4163 | 0.6046 | 0.4237 |
| 19.25 | 1.2907 | 1.2145 | 1.0891 | 0.8773 | 0.8193 | 0.5418 | 0.6214 | 0.4183 | 0.6191 | 0.431  |
| 19.5  | 1.3032 | 1.2259 | 1.1041 | 0.8906 | 0.8316 | 0.552  | 0.6363 | 0.4213 | 0.6335 | 0.4389 |
| 19.75 | 1.3141 | 1.239  | 1.1166 | 0.9042 | 0.8455 | 0.5617 | 0.6519 | 0.4249 | 0.6485 | 0.4472 |
| 20    | 1.3251 | 1.2497 | 1.1283 | 0.9169 | 0.8612 | 0.5757 | 0.6676 | 0.4278 | 0.6615 | 0.4561 |
| 20.25 | 1.3374 | 1.2637 | 1.1419 | 0.9307 | 0.8738 | 0.5841 | 0.682  | 0.4311 | 0.6771 | 0.4649 |
| 20.5  | 1.3474 | 1.2743 | 1.1521 | 0.9431 | 0.8886 | 0.5957 | 0.6975 | 0.4354 | 0.6906 | 0.4724 |
| 20.75 | 1.3589 | 1.2848 | 1.1637 | 0.9545 | 0.9005 | 0.605  | 0.7131 | 0.4377 | 0.7041 | 0.481  |
| 21    | 1.3704 | 1.2956 | 1.1744 | 0.9671 | 0.9115 | 0.6182 | 0.7265 | 0.4407 | 0.7179 | 0.4911 |
| 21.25 | 1.3806 | 1.3083 | 1.1829 | 0.9773 | 0.9247 | 0.6275 | 0.7414 | 0.4441 | 0.7306 | 0.4991 |
| 21.5  | 1.39   | 1.3184 | 1.1906 | 0.9881 | 0.9363 | 0.6382 | 0.7572 | 0.4462 | 0.7446 | 0.5064 |
| 21.75 | 1.3999 | 1.3289 | 1.2037 | 0.9987 | 0.9465 | 0.651  | 0.7711 | 0.4494 | 0.7573 | 0.5152 |
| 22    | 1.4093 | 1.3395 | 1.2116 | 1.0088 | 0.9578 | 0.6619 | 0.7877 | 0.4516 | 0.7707 | 0.5236 |
| 22.25 | 1.4189 | 1.3493 | 1.2223 | 1.0197 | 0.9697 | 0.672  | 0.8015 | 0.4541 | 0.784  | 0.5301 |
| 22.5  | 1.4278 | 1.3589 | 1.2316 | 1.0315 | 0.9805 | 0.6836 | 0.8159 | 0.4563 | 0.7965 | 0.5394 |
| 22.75 | 1.4356 | 1.369  | 1.2391 | 1.0392 | 0.9913 | 0.697  | 0.8307 | 0.4586 | 0.8087 | 0.5465 |
| 23    | 1.4425 | 1.3781 | 1.2485 | 1.0496 | 1.0004 | 0.7061 | 0.847  | 0.4614 | 0.8204 | 0.555  |
| 23.25 | 1.4488 | 1.3861 | 1.257  | 1.058  | 1.0138 | 0.7194 | 0.8607 | 0.464  | 0.8319 | 0.5614 |
| 23.5  | 1.4527 | 1.3947 | 1.2667 | 1.0676 | 1.0223 | 0.7293 | 0.8747 | 0.4648 | 0.8434 | 0.5703 |
| 23.75 | 1.4559 | 1.4037 | 1.2752 | 1.08   | 1.0319 | 0.7397 | 0.8881 | 0.469  | 0.8547 | 0.5778 |
| 24    | 1.4583 | 1.4119 | 1.2845 | 1.091  | 1.041  | 0.7538 | 0.9029 | 0.4694 | 0.865  | 0.5861 |
| 24.25 | 1.4609 | 1.4188 | 1.2937 | 1.0989 | 1.0511 | 0.7648 | 0.9167 | 0.4729 | 0.8779 | 0.5934 |
| 24.5  | 1.4615 | 1.4276 | 1.3014 | 1.1072 | 1.0622 | 0.7757 | 0.933  | 0.4759 | 0.8892 | 0.5997 |
| 24.75 | 1.4635 | 1.4341 | 1.3101 | 1.1152 | 1.0733 | 0.7875 | 0.946  | 0.4775 | 0.8975 | 0.608  |
| 25    | 1.466  | 1.4379 | 1.3177 | 1.1246 | 1.0811 | 0.7947 | 0.9588 | 0.4789 | 0.9083 | 0.6149 |
| 25.25 | 1.4669 | 1.4431 | 1.3269 | 1.1335 | 1.0859 | 0.8032 | 0.9716 | 0.4806 | 0.9183 | 0.6219 |
| 25.5  | 1.4687 | 1.4476 | 1.3358 | 1.1399 | 1.094  | 0.8144 | 0.9849 | 0.4829 | 0.9296 | 0.6286 |
| 25.75 | 1.4687 | 1.4518 | 1.345  | 1.1505 | 1.1042 | 0.8275 | 0.9982 | 0.4863 | 0.9365 | 0.6359 |
| 26    | 1.4682 | 1.453  | 1.3526 | 1.1589 | 1.1112 | 0.8379 | 1.0111 | 0.4881 | 0.9468 | 0.644  |
| 26.25 | 1.4704 | 1.4557 | 1.3577 | 1.1674 | 1.1194 | 0.8468 | 1.0218 | 0.4904 | 0.9573 | 0.651  |
| 26.5  | 1.4702 | 1.4595 | 1.368  | 1.1761 | 1.1282 | 0.8544 | 1.0357 | 0.4925 | 0.9653 | 0.6576 |
| 26.75 | 1.4706 | 1.4619 | 1.3756 | 1.1863 | 1.1371 | 0.8662 | 1.0461 | 0.4954 | 0.9758 | 0.6636 |
| 27    | 1.4716 | 1.4639 | 1.3808 | 1.1958 | 1.1459 | 0.875  | 1.0607 | 0.4975 | 0.9841 | 0.6709 |
| 27.25 | 1.4725 | 1.4677 | 1.3894 | 1.2039 | 1.1552 | 0.8855 | 1.0739 | 0.5001 | 0.9938 | 0.6778 |
| 27.5  | 1.473  | 1.4709 | 1.396  | 1.2142 | 1.1647 | 0.8942 | 1.0851 | 0.5011 | 1.0027 | 0.6846 |
| 27.75 | 1.4747 | 1.4735 | 1.4025 | 1.2207 | 1.1735 | 0.9056 | 1.0975 | 0.5028 | 1.0125 | 0.6926 |
| 28    | 1.4747 | 1.4758 | 1.4095 | 1.2321 | 1.1808 | 0.9136 | 1.1111 | 0.5049 | 1.0229 | 0.698  |
| 28.25 | 1.4772 | 1.4784 | 1.4156 | 1.2378 | 1.1882 | 0.924  | 1.1222 | 0.5067 | 1.0308 | 0.7053 |
| 28.5  | 1.4758 | 1.4806 | 1.4201 | 1.2469 | 1.1997 | 0.9353 | 1.1344 | 0.5092 | 1.0413 | 0.7116 |

|       |        |        |        |        |        |        |        |        |        |        |
|-------|--------|--------|--------|--------|--------|--------|--------|--------|--------|--------|
| 28.75 | 1.4763 | 1.4813 | 1.4239 | 1.2563 | 1.2068 | 0.9411 | 1.1439 | 0.5098 | 1.0508 | 0.7184 |
| 29    | 1.4771 | 1.4829 | 1.4289 | 1.2658 | 1.2172 | 0.9517 | 1.1562 | 0.5131 | 1.06   | 0.7252 |
| 29.25 | 1.4786 | 1.485  | 1.4341 | 1.2731 | 1.2266 | 0.9618 | 1.167  | 0.5143 | 1.0703 | 0.7324 |
| 29.5  | 1.4803 | 1.4861 | 1.4367 | 1.2804 | 1.2341 | 0.9736 | 1.1789 | 0.5167 | 1.0773 | 0.7379 |
| 29.75 | 1.4807 | 1.4866 | 1.4387 | 1.2888 | 1.242  | 0.9828 | 1.1894 | 0.5183 | 1.0877 | 0.7468 |
| 30    | 1.4823 | 1.4892 | 1.4412 | 1.2994 | 1.2519 | 0.9923 | 1.2016 | 0.5215 | 1.0976 | 0.753  |
| 30.25 | 1.4831 | 1.49   | 1.4444 | 1.3085 | 1.2576 | 1.0015 | 1.2146 | 0.523  | 1.1078 | 0.7611 |
| 30.5  | 1.4829 | 1.4913 | 1.4444 | 1.3117 | 1.2686 | 1.0086 | 1.2241 | 0.5238 | 1.1162 | 0.7667 |
| 30.75 | 1.4823 | 1.4923 | 1.4446 | 1.3226 | 1.2769 | 1.0165 | 1.2329 | 0.5274 | 1.1248 | 0.7713 |
| 31    | 1.4825 | 1.4929 | 1.4466 | 1.3303 | 1.2858 | 1.0292 | 1.2455 | 0.5295 | 1.1348 | 0.7788 |
| 31.25 | 1.4843 | 1.4939 | 1.448  | 1.3388 | 1.2946 | 1.0369 | 1.2534 | 0.5315 | 1.1426 | 0.7861 |
| 31.5  | 1.4842 | 1.496  | 1.4475 | 1.3457 | 1.302  | 1.0497 | 1.2634 | 0.5324 | 1.1521 | 0.7916 |
| 31.75 | 1.4837 | 1.4956 | 1.4475 | 1.3531 | 1.3109 | 1.0581 | 1.275  | 0.5347 | 1.1616 | 0.7992 |
| 32    | 1.4837 | 1.4964 | 1.4488 | 1.359  | 1.3199 | 1.0701 | 1.2836 | 0.5362 | 1.1693 | 0.8065 |
| 32.25 | 1.4847 | 1.4969 | 1.4483 | 1.3662 | 1.3277 | 1.0778 | 1.2918 | 0.5373 | 1.1783 | 0.8122 |
| 32.5  | 1.4848 | 1.4964 | 1.448  | 1.3723 | 1.3358 | 1.0861 | 1.3021 | 0.5401 | 1.188  | 0.8171 |
| 32.75 | 1.4858 | 1.4974 | 1.448  | 1.3792 | 1.3439 | 1.0967 | 1.3117 | 0.5422 | 1.1965 | 0.8242 |
| 33    | 1.4867 | 1.4992 | 1.4467 | 1.3834 | 1.3537 | 1.1081 | 1.3223 | 0.5436 | 1.2061 | 0.8319 |
| 33.25 | 1.4876 | 1.498  | 1.4476 | 1.3891 | 1.3613 | 1.1157 | 1.3313 | 0.5444 | 1.2145 | 0.8399 |
| 33.5  | 1.4885 | 1.4993 | 1.4481 | 1.393  | 1.3675 | 1.1257 | 1.3393 | 0.5466 | 1.2228 | 0.847  |
| 33.75 | 1.4883 | 1.4994 | 1.4469 | 1.3998 | 1.3734 | 1.1333 | 1.3486 | 0.5487 | 1.2328 | 0.8531 |
| 34    | 1.4888 | 1.4988 | 1.4474 | 1.4047 | 1.3827 | 1.1442 | 1.3581 | 0.5517 | 1.2408 | 0.8581 |
| 34.25 | 1.4892 | 1.4995 | 1.4471 | 1.4084 | 1.3869 | 1.1526 | 1.3685 | 0.552  | 1.2519 | 0.866  |
| 34.5  | 1.4899 | 1.4996 | 1.4474 | 1.4136 | 1.3966 | 1.1659 | 1.3749 | 0.5556 | 1.2594 | 0.875  |
| 34.75 | 1.4919 | 1.5003 | 1.4472 | 1.4155 | 1.4015 | 1.1739 | 1.3845 | 0.5548 | 1.2699 | 0.8822 |
| 35    | 1.492  | 1.5014 | 1.4486 | 1.4175 | 1.4089 | 1.1844 | 1.3925 | 0.5584 | 1.2781 | 0.8884 |
| 35.25 | 1.4922 | 1.502  | 1.4486 | 1.4178 | 1.4164 | 1.1922 | 1.4013 | 0.5599 | 1.2876 | 0.8942 |
| 35.5  | 1.4933 | 1.5004 | 1.4477 | 1.4191 | 1.4206 | 1.2021 | 1.4085 | 0.5622 | 1.2951 | 0.9018 |
| 35.75 | 1.4939 | 1.5019 | 1.4479 | 1.4195 | 1.4267 | 1.212  | 1.4169 | 0.5639 | 1.3032 | 0.9068 |
| 36    | 1.4951 | 1.5018 | 1.4476 | 1.4221 | 1.4311 | 1.2197 | 1.427  | 0.5665 | 1.3096 | 0.9157 |
| 36.25 | 1.4965 | 1.5015 | 1.4469 | 1.4202 | 1.4382 | 1.2309 | 1.4314 | 0.5683 | 1.3189 | 0.9237 |
| 36.5  | 1.4976 | 1.5021 | 1.4473 | 1.4194 | 1.441  | 1.2392 | 1.4398 | 0.5695 | 1.3254 | 0.9294 |
| 36.75 | 1.4983 | 1.5037 | 1.4481 | 1.4222 | 1.4448 | 1.2466 | 1.4472 | 0.5726 | 1.337  | 0.9367 |
| 37    | 1.4992 | 1.5034 | 1.4477 | 1.42   | 1.4489 | 1.2558 | 1.4539 | 0.5751 | 1.3398 | 0.9452 |
| 37.25 | 1.4997 | 1.504  | 1.449  | 1.4212 | 1.4508 | 1.2629 | 1.4606 | 0.5765 | 1.3471 | 0.9491 |
| 37.5  | 1.5011 | 1.5037 | 1.4489 | 1.4193 | 1.4517 | 1.2704 | 1.4674 | 0.5779 | 1.3533 | 0.9566 |
| 37.75 | 1.502  | 1.505  | 1.4486 | 1.4203 | 1.454  | 1.2797 | 1.4723 | 0.5799 | 1.3581 | 0.9654 |
| 38    | 1.5029 | 1.5047 | 1.4475 | 1.421  | 1.455  | 1.2879 | 1.4779 | 0.5828 | 1.3671 | 0.9707 |
| 38.25 | 1.5029 | 1.5046 | 1.449  | 1.4213 | 1.4549 | 1.2944 | 1.482  | 0.5833 | 1.3727 | 0.9784 |
| 38.5  | 1.504  | 1.505  | 1.4481 | 1.4212 | 1.4553 | 1.3012 | 1.4892 | 0.586  | 1.3772 | 0.9849 |
| 38.75 | 1.5035 | 1.5042 | 1.448  | 1.4233 | 1.4589 | 1.3092 | 1.4931 | 0.5875 | 1.3835 | 0.9936 |
| 39    | 1.5042 | 1.505  | 1.4488 | 1.4217 | 1.4557 | 1.3153 | 1.4969 | 0.5902 | 1.3888 | 1.0009 |

|       |        |        |        |        |        |        |        |        |        |        |
|-------|--------|--------|--------|--------|--------|--------|--------|--------|--------|--------|
| 39.25 | 1.5058 | 1.5049 | 1.4482 | 1.4226 | 1.4543 | 1.3226 | 1.4994 | 0.592  | 1.391  | 1.0086 |
| 39.5  | 1.507  | 1.5052 | 1.4485 | 1.4243 | 1.4562 | 1.3274 | 1.5018 | 0.593  | 1.3937 | 1.0161 |
| 39.75 | 1.5073 | 1.506  | 1.4484 | 1.424  | 1.4544 | 1.3328 | 1.5036 | 0.5949 | 1.3953 | 1.0224 |
| 40    | 1.5077 | 1.5062 | 1.4489 | 1.4217 | 1.4563 | 1.3407 | 1.5049 | 0.5965 | 1.3949 | 1.0284 |
| 40.25 | 1.5093 | 1.5063 | 1.4496 | 1.4241 | 1.4576 | 1.344  | 1.5052 | 0.5996 | 1.3972 | 1.0375 |
| 40.5  | 1.5096 | 1.506  | 1.4489 | 1.4251 | 1.4567 | 1.3459 | 1.5056 | 0.6011 | 1.3984 | 1.0433 |
| 40.75 | 1.5108 | 1.5059 | 1.4494 | 1.4268 | 1.4575 | 1.3478 | 1.5039 | 0.6034 | 1.3973 | 1.0504 |
| 41    | 1.5129 | 1.5053 | 1.4485 | 1.4262 | 1.4592 | 1.3491 | 1.5046 | 0.6034 | 1.3977 | 1.0587 |
| 41.25 | 1.5127 | 1.5048 | 1.4491 | 1.4282 | 1.4597 | 1.3512 | 1.5049 | 0.606  | 1.3979 | 1.0656 |
| 41.5  | 1.513  | 1.5052 | 1.4495 | 1.4282 | 1.4605 | 1.3523 | 1.5042 | 0.6073 | 1.3979 | 1.0709 |
| 41.75 | 1.513  | 1.5045 | 1.4496 | 1.4291 | 1.4606 | 1.3529 | 1.505  | 0.608  | 1.3966 | 1.0769 |
| 42    | 1.5143 | 1.506  | 1.4492 | 1.4294 | 1.4608 | 1.3534 | 1.5042 | 0.6113 | 1.3969 | 1.0856 |
| 42.25 | 1.5164 | 1.506  | 1.4512 | 1.4306 | 1.462  | 1.3546 | 1.5048 | 0.6116 | 1.3981 | 1.092  |
| 42.5  | 1.5166 | 1.5062 | 1.4516 | 1.431  | 1.4627 | 1.3556 | 1.5044 | 0.6143 | 1.397  | 1.0996 |
| 42.75 | 1.518  | 1.506  | 1.4518 | 1.4288 | 1.4633 | 1.3544 | 1.5039 | 0.6175 | 1.3988 | 1.1078 |
| 43    | 1.5154 | 1.5053 | 1.4522 | 1.4301 | 1.4633 | 1.3531 | 1.5049 | 0.6197 | 1.3995 | 1.1143 |
| 43.25 | 1.5129 | 1.5059 | 1.4522 | 1.4293 | 1.4638 | 1.3523 | 1.5038 | 0.6219 | 1.3994 | 1.1205 |
| 43.5  | 1.5111 | 1.5064 | 1.4527 | 1.4307 | 1.4633 | 1.3524 | 1.5048 | 0.6226 | 1.401  | 1.1288 |
| 43.75 | 1.5114 | 1.5084 | 1.453  | 1.4317 | 1.4644 | 1.3537 | 1.5046 | 0.6242 | 1.4008 | 1.1359 |
| 44    | 1.5125 | 1.5078 | 1.4529 | 1.4327 | 1.4669 | 1.3579 | 1.5055 | 0.626  | 1.4023 | 1.1431 |
| 44.25 | 1.5102 | 1.5073 | 1.4529 | 1.433  | 1.4649 | 1.3586 | 1.504  | 0.6287 | 1.4022 | 1.1499 |
| 44.5  | 1.5105 | 1.5065 | 1.4523 | 1.4348 | 1.4628 | 1.3578 | 1.5049 | 0.6303 | 1.4029 | 1.1569 |
| 44.75 | 1.5104 | 1.5065 | 1.454  | 1.4352 | 1.4649 | 1.3589 | 1.5043 | 0.6341 | 1.4021 | 1.1643 |
| 45    | 1.5092 | 1.5064 | 1.4543 | 1.4365 | 1.466  | 1.3585 | 1.5058 | 0.6346 | 1.4033 | 1.1709 |
| 45.25 | 1.5105 | 1.5057 | 1.4541 | 1.4343 | 1.4659 | 1.3604 | 1.5051 | 0.6368 | 1.4026 | 1.1804 |
| 45.5  | 1.5103 | 1.5065 | 1.4557 | 1.437  | 1.4655 | 1.3611 | 1.506  | 0.638  | 1.4043 | 1.1868 |
| 45.75 | 1.51   | 1.5067 | 1.4559 | 1.4348 | 1.4656 | 1.3616 | 1.5056 | 0.6393 | 1.4046 | 1.1939 |
| 46    | 1.5108 | 1.5061 | 1.4561 | 1.436  | 1.4673 | 1.3619 | 1.5068 | 0.6421 | 1.4043 | 1.197  |
| 46.25 | 1.5109 | 1.5064 | 1.456  | 1.4357 | 1.4654 | 1.362  | 1.5063 | 0.6431 | 1.4048 | 1.2037 |
| 46.5  | 1.511  | 1.5069 | 1.4571 | 1.4364 | 1.4697 | 1.363  | 1.5074 | 0.6453 | 1.4044 | 1.2145 |
| 46.75 | 1.511  | 1.5052 | 1.4577 | 1.4365 | 1.469  | 1.3643 | 1.5076 | 0.6481 | 1.404  | 1.2181 |
| 47    | 1.5111 | 1.5059 | 1.4574 | 1.4376 | 1.4671 | 1.3633 | 1.5072 | 0.6495 | 1.4056 | 1.2228 |
| 47.25 | 1.5102 | 1.5042 | 1.4571 | 1.4375 | 1.4669 | 1.3627 | 1.5075 | 0.6525 | 1.4056 | 1.2313 |
| 47.5  | 1.5112 | 1.5044 | 1.4583 | 1.4383 | 1.4682 | 1.3636 | 1.507  | 0.6545 | 1.4062 | 1.2382 |
| 47.75 | 1.5109 | 1.5036 | 1.4575 | 1.4398 | 1.4669 | 1.3634 | 1.5081 | 0.6556 | 1.4058 | 1.2456 |
| 48    | 1.511  | 1.5046 | 1.4582 | 1.4394 | 1.4678 | 1.363  | 1.5072 | 0.6573 | 1.4061 | 1.2509 |
| 48.25 | 1.511  | 1.5042 | 1.4587 | 1.4401 | 1.4678 | 1.3626 | 1.5068 | 0.6589 | 1.4063 | 1.2557 |
| 48.5  | 1.5111 | 1.504  | 1.4592 | 1.4407 | 1.4664 | 1.3633 | 1.5073 | 0.66   | 1.4073 | 1.2609 |
| 48.75 | 1.5107 | 1.5019 | 1.4578 | 1.4397 | 1.4665 | 1.3641 | 1.5065 | 0.6617 | 1.4059 | 1.2683 |
| 49    | 1.5112 | 1.5026 | 1.4586 | 1.4403 | 1.4666 | 1.3634 | 1.5074 | 0.6638 | 1.4073 | 1.2728 |
| 49.25 | 1.5109 | 1.5034 | 1.4604 | 1.4407 | 1.4676 | 1.3638 | 1.5064 | 0.667  | 1.4069 | 1.2777 |
| 49.5  | 1.5094 | 1.504  | 1.4603 | 1.4409 | 1.4682 | 1.3649 | 1.507  | 0.6685 | 1.4071 | 1.2848 |

|       |        |        |        |        |        |        |        |      |        |        |
|-------|--------|--------|--------|--------|--------|--------|--------|------|--------|--------|
| 49.75 | 1.5105 | 1.5038 | 1.4602 | 1.4399 | 1.4673 | 1.3639 | 1.5066 | 0.67 | 1.4078 | 1.2924 |
|-------|--------|--------|--------|--------|--------|--------|--------|------|--------|--------|



**H8**

**RAD 30**

0.1311  
0.1302  
0.1298  
0.129  
0.1285  
0.1278  
0.1274

- ◆ WT
- WT(GA 3)
- ▲ WT(RAD 3)
- × NO DRUG
- \* GA 3uM
- + NOVO 100
- RAD 3
- GA 7uM
- ◆ RAD 10

- NOVO 250

■ RAD 30

0.1917  
0.1929  
0.1958  
0.1987  
0.2013  
0.2016  
0.2072  
0.2117  
0.2157  
0.2187  
0.222  
0.2256  
0.228  
0.2311  
0.234  
0.2366  
0.2404  
0.2431  
0.2461  
0.2418  
0.2369  
0.239  
0.2438  
0.2459  
0.2488  
0.2509  
0.253  
0.2542

0.2566  
0.2587  
0.2607  
0.2624  
0.2654  
0.2677  
0.2699  
0.2723  
0.2752  
0.2779  
0.2807  
0.2839  
0.2855  
0.2886  
0.2911  
0.2929  
0.2957  
0.2986  
0.3014  
0.304  
0.3067  
0.3096  
0.3117  
0.3139  
0.3169  
0.3193  
0.3216  
0.3231  
0.3264  
0.3289  
0.3306  
0.3352  
0.3363  
0.3384  
0.3402  
0.3426  
0.3449  
0.3468  
0.35  
0.3508  
0.354  
0.3554

0.3576  
0.3593  
0.3613  
0.3634  
0.3658  
0.3675  
0.3721  
0.3733  
0.3742  
0.3762  
0.3796  
0.3806  
0.3831  
0.3837  
0.3864  
0.3882  
0.3891  
0.3919  
0.3932  
0.395  
0.3977  
0.398  
0.4002  
0.4033  
0.4037  
0.4069  
0.4084  
0.4103  
0.411  
0.4137  
0.4153  
0.418  
0.4216  
0.4218  
0.4234  
0.4252  
0.4278  
0.4301  
0.431  
0.4321  
0.4349  
0.4355

0.4386  
0.4403  
0.4413  
0.4439  
0.4474  
0.4479  
0.4502  
0.4501  
0.4532  
0.4552  
0.4554  
0.4589  
0.4596  
0.4629  
0.464  
0.4656  
0.4688  
0.4693  
0.4716  
0.4729  
0.4758  
0.476  
0.4786  
0.4804  
0.4818  
0.4842  
0.4857  
0.4883  
0.4909  
0.4921  
0.4944  
0.4951  
0.4983  
0.4989  
0.5003  
0.504  
0.5047  
0.5064  
0.5077  
0.509  
0.5135  
0.513

0.5158

C9 C10 C11 C12 C13

| TIME | WT     | WT(GA 3) | WT(RAD 3) | NO DRUG | GA 3uM | GA 7uM | NOVO 100 | NOVO 250 |
|------|--------|----------|-----------|---------|--------|--------|----------|----------|
| 0    | 0.1894 | 0.2051   | 0.1892    | 0.18    | 0.1698 | 0.1691 | 0.205    | 0.2572   |
| 0.25 | 0.1844 | 0.1929   | 0.1812    | 0.1681  | 0.1624 | 0.1575 | 0.2072   | 0.2577   |
| 0.5  | 0.1833 | 0.1912   | 0.1787    | 0.1642  | 0.1596 | 0.1536 | 0.2095   | 0.2607   |
| 0.75 | 0.1838 | 0.189    | 0.1758    | 0.1609  | 0.1579 | 0.1499 | 0.2086   | 0.2619   |
| 1    | 0.1843 | 0.1877   | 0.1818    | 0.1616  | 0.1586 | 0.149  | 0.2078   | 0.2662   |
| 1.25 | 0.1867 | 0.1862   | 0.1826    | 0.1612  | 0.1586 | 0.1492 | 0.209    | 0.2672   |

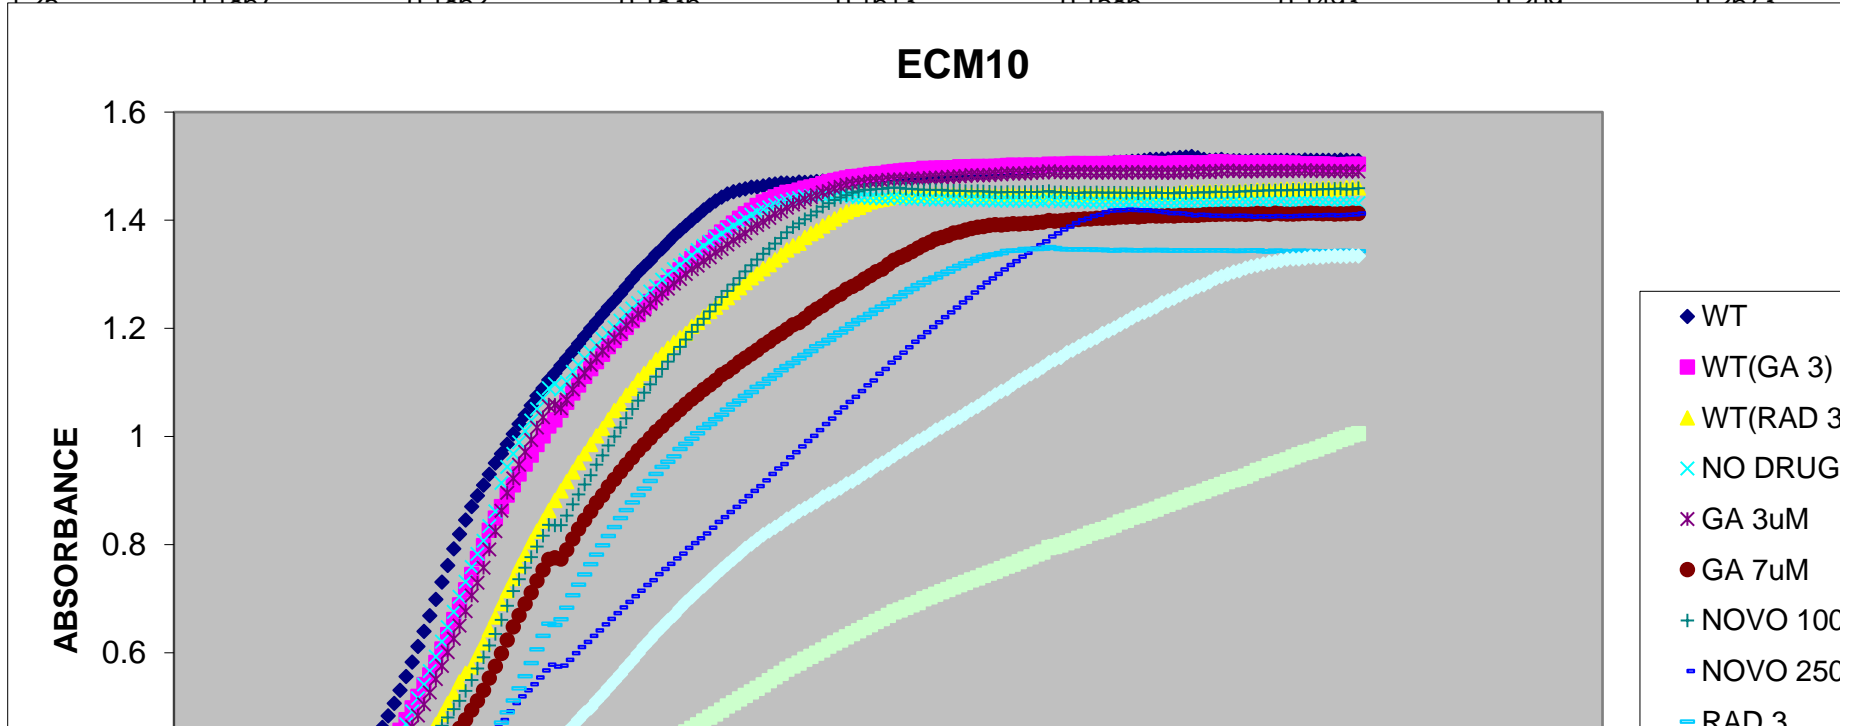

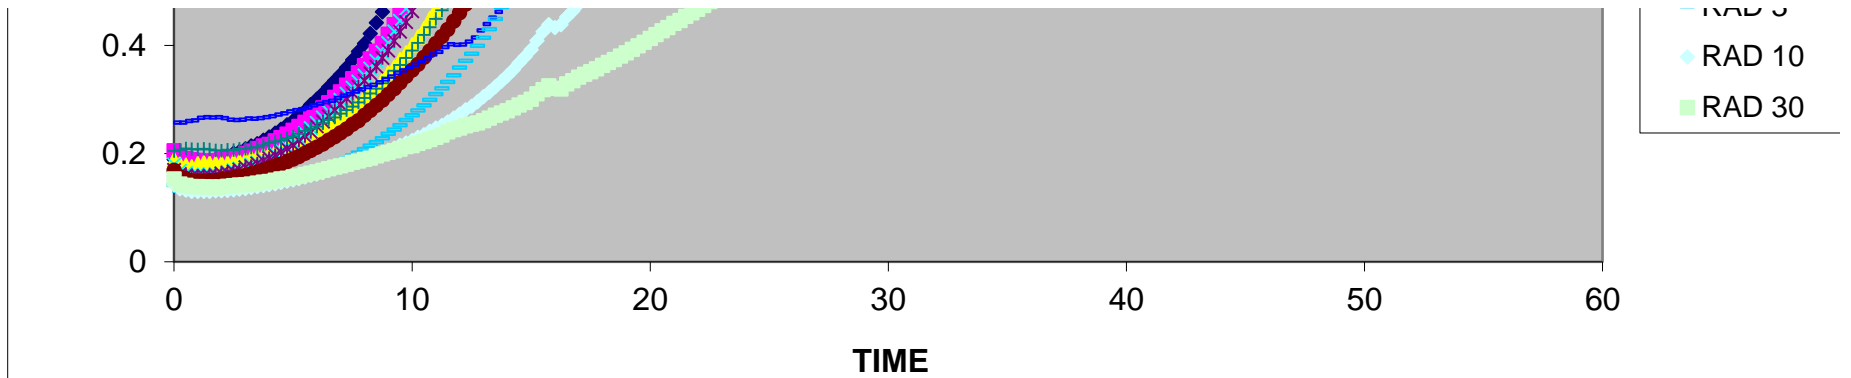

| TIME  | RAD 5  | RAD 10 | RAD 30 |
|-------|--------|--------|--------|
| 9.75  | 0.5502 | 0.4705 | 0.3805 |
| 10    | 0.5829 | 0.4986 | 0.4011 |
| 10.25 | 0.6122 | 0.5197 | 0.416  |
| 10.5  | 0.6397 | 0.5418 | 0.4316 |
| 10.75 | 0.6685 | 0.5593 | 0.4497 |
| 11    | 0.6992 | 0.5825 | 0.4678 |
| 11.25 | 0.7307 | 0.6075 | 0.4857 |
| 11.5  | 0.7614 | 0.6339 | 0.5059 |
| 11.75 | 0.7927 | 0.6618 | 0.5242 |
| 12    | 0.8194 | 0.6889 | 0.5464 |
| 12.25 | 0.8459 | 0.7168 | 0.5622 |
| 12.5  | 0.8706 | 0.7448 | 0.5743 |
| 12.75 | 0.8904 | 0.7744 | 0.5968 |
| 13    | 0.9099 | 0.7982 | 0.6186 |
| 13.25 | 0.9301 | 0.8269 | 0.6426 |
| 13.5  | 0.9508 | 0.849  | 0.6665 |
| 13.75 | 0.9679 | 0.8707 | 0.6913 |
| 14    | 0.986  | 0.8918 | 0.7152 |
| 14.25 | 1.0047 | 0.9106 | 0.7372 |
| 14.5  | 1.0233 | 0.9308 | 0.7608 |
| 14.75 | 1.0397 | 0.9491 | 0.7825 |
| 15    | 1.0577 | 0.966  | 0.8057 |
| 15.25 | 1.0753 | 0.9853 | 0.8251 |
| 15.5  | 1.0897 | 1.0015 | 0.8439 |
| 15.75 | 1.1049 | 1.0198 | 0.8628 |
| 16    | 1.1171 | 1.031  | 0.8817 |
| 16.25 | 1.1316 | 1.0487 | 0.8996 |
| 16.5  | 1.1443 | 1.0637 | 0.9165 |
| 16.75 | 1.1579 | 1.0806 | 0.9342 |
| 17    | 1.1715 | 1.0952 | 0.9517 |



|       |        |        |        |        |        |        |        |        |
|-------|--------|--------|--------|--------|--------|--------|--------|--------|
| 17.25 | 1.1858 | 1.1114 | 0.9682 | 1.1446 | 1.1172 | 0.8459 | 0.9113 | 0.6204 |
| 17.5  | 1.2004 | 1.1256 | 0.9855 | 1.1558 | 1.1325 | 0.8618 | 0.9288 | 0.6317 |
| 17.75 | 1.2123 | 1.1388 | 1.0016 | 1.1695 | 1.1452 | 0.8779 | 0.9481 | 0.6417 |
| 18    | 1.2261 | 1.1522 | 1.015  | 1.1808 | 1.1587 | 0.8914 | 0.9655 | 0.6527 |
| 18.25 | 1.239  | 1.1664 | 1.0307 | 1.1912 | 1.1696 | 0.907  | 0.9834 | 0.6628 |
| 18.5  | 1.251  | 1.1779 | 1.0478 | 1.202  | 1.1823 | 0.9211 | 1      | 0.6737 |
| 18.75 | 1.2641 | 1.1907 | 1.0607 | 1.2146 | 1.1932 | 0.9352 | 1.0167 | 0.6841 |
| 19    | 1.2773 | 1.2018 | 1.0765 | 1.2271 | 1.2061 | 0.948  | 1.034  | 0.6944 |
| 19.25 | 1.2907 | 1.2145 | 1.0891 | 1.2369 | 1.2157 | 0.9609 | 1.051  | 0.7049 |
| 19.5  | 1.3032 | 1.2259 | 1.1041 | 1.2467 | 1.2267 | 0.9741 | 1.0664 | 0.7148 |
| 19.75 | 1.3141 | 1.239  | 1.1166 | 1.2577 | 1.2352 | 0.9853 | 1.081  | 0.7254 |
| 20    | 1.3251 | 1.2497 | 1.1283 | 1.2684 | 1.2457 | 0.9974 | 1.0966 | 0.7344 |
| 20.25 | 1.3374 | 1.2637 | 1.1419 | 1.2781 | 1.2551 | 1.0092 | 1.1109 | 0.7459 |
| 20.5  | 1.3474 | 1.2743 | 1.1521 | 1.2901 | 1.2648 | 1.0192 | 1.1251 | 0.7549 |
| 20.75 | 1.3589 | 1.2848 | 1.1637 | 1.2989 | 1.2735 | 1.0302 | 1.1387 | 0.7645 |
| 21    | 1.3704 | 1.2956 | 1.1744 | 1.3095 | 1.283  | 1.04   | 1.1524 | 0.7745 |
| 21.25 | 1.3806 | 1.3083 | 1.1829 | 1.3165 | 1.291  | 1.0496 | 1.1657 | 0.7833 |
| 21.5  | 1.39   | 1.3184 | 1.1906 | 1.326  | 1.3005 | 1.06   | 1.1796 | 0.7942 |
| 21.75 | 1.3999 | 1.3289 | 1.2037 | 1.3349 | 1.3094 | 1.0696 | 1.1936 | 0.803  |
| 22    | 1.4093 | 1.3395 | 1.2116 | 1.3452 | 1.3159 | 1.0775 | 1.2065 | 0.8117 |
| 22.25 | 1.4189 | 1.3493 | 1.2223 | 1.3529 | 1.3243 | 1.0872 | 1.2178 | 0.8208 |
| 22.5  | 1.4278 | 1.3589 | 1.2316 | 1.3605 | 1.3315 | 1.0953 | 1.2317 | 0.8312 |
| 22.75 | 1.4356 | 1.369  | 1.2391 | 1.3683 | 1.3402 | 1.1037 | 1.2439 | 0.8419 |
| 23    | 1.4425 | 1.3781 | 1.2485 | 1.3751 | 1.3471 | 1.1141 | 1.2581 | 0.851  |
| 23.25 | 1.4488 | 1.3861 | 1.257  | 1.383  | 1.3551 | 1.1201 | 1.2692 | 0.8605 |
| 23.5  | 1.4527 | 1.3947 | 1.2667 | 1.3902 | 1.3629 | 1.1284 | 1.2814 | 0.8697 |
| 23.75 | 1.4559 | 1.4037 | 1.2752 | 1.3967 | 1.37   | 1.1378 | 1.293  | 0.8801 |
| 24    | 1.4583 | 1.4119 | 1.2845 | 1.4033 | 1.3762 | 1.1453 | 1.3052 | 0.8899 |
| 24.25 | 1.4609 | 1.4188 | 1.2937 | 1.4101 | 1.3854 | 1.1527 | 1.3166 | 0.8996 |
| 24.5  | 1.4615 | 1.4276 | 1.3014 | 1.4157 | 1.3913 | 1.1602 | 1.3274 | 0.9087 |
| 24.75 | 1.4635 | 1.4341 | 1.3101 | 1.42   | 1.3971 | 1.1687 | 1.3382 | 0.9192 |
| 25    | 1.466  | 1.4379 | 1.3177 | 1.4241 | 1.4046 | 1.1761 | 1.3478 | 0.9308 |
| 25.25 | 1.4669 | 1.4431 | 1.3269 | 1.428  | 1.4113 | 1.184  | 1.3572 | 0.9412 |
| 25.5  | 1.4687 | 1.4476 | 1.3358 | 1.432  | 1.4161 | 1.1908 | 1.3668 | 0.9495 |
| 25.75 | 1.4687 | 1.4518 | 1.345  | 1.4355 | 1.4235 | 1.1984 | 1.3778 | 0.9614 |
| 26    | 1.4682 | 1.453  | 1.3526 | 1.4385 | 1.4293 | 1.2068 | 1.3869 | 0.971  |
| 26.25 | 1.4704 | 1.4557 | 1.3577 | 1.4412 | 1.4334 | 1.211  | 1.3942 | 0.9818 |
| 26.5  | 1.4702 | 1.4595 | 1.368  | 1.4438 | 1.4387 | 1.2183 | 1.4022 | 0.992  |
| 26.75 | 1.4706 | 1.4619 | 1.3756 | 1.4448 | 1.4425 | 1.2285 | 1.4092 | 1.0015 |
| 27    | 1.4716 | 1.4639 | 1.3808 | 1.4444 | 1.4461 | 1.2359 | 1.4164 | 1.0119 |
| 27.25 | 1.4725 | 1.4677 | 1.3894 | 1.4451 | 1.4516 | 1.2419 | 1.4248 | 1.0232 |
| 27.5  | 1.473  | 1.4709 | 1.396  | 1.4459 | 1.4543 | 1.2506 | 1.4313 | 1.0334 |

|       |        |        |        |        |        |        |        |        |
|-------|--------|--------|--------|--------|--------|--------|--------|--------|
| 27.75 | 1.4747 | 1.4735 | 1.4025 | 1.4451 | 1.4589 | 1.2579 | 1.4376 | 1.0444 |
| 28    | 1.4747 | 1.4758 | 1.4095 | 1.4453 | 1.4618 | 1.2635 | 1.4424 | 1.0538 |
| 28.25 | 1.4772 | 1.4784 | 1.4156 | 1.4451 | 1.4651 | 1.2722 | 1.4465 | 1.0638 |
| 28.5  | 1.4758 | 1.4806 | 1.4201 | 1.4446 | 1.4673 | 1.2777 | 1.4509 | 1.0738 |
| 28.75 | 1.4763 | 1.4813 | 1.4239 | 1.4427 | 1.469  | 1.2836 | 1.4532 | 1.084  |
| 29    | 1.4771 | 1.4829 | 1.4289 | 1.4424 | 1.4701 | 1.2913 | 1.4564 | 1.0947 |
| 29.25 | 1.4786 | 1.485  | 1.4341 | 1.4417 | 1.4715 | 1.298  | 1.4566 | 1.1038 |
| 29.5  | 1.4803 | 1.4861 | 1.4367 | 1.4411 | 1.4725 | 1.3048 | 1.4577 | 1.1159 |
| 29.75 | 1.4807 | 1.4866 | 1.4387 | 1.4402 | 1.4725 | 1.3094 | 1.4581 | 1.1253 |
| 30    | 1.4823 | 1.4892 | 1.4412 | 1.4408 | 1.475  | 1.3185 | 1.4598 | 1.1369 |
| 30.25 | 1.4831 | 1.49   | 1.4444 | 1.4426 | 1.4754 | 1.3263 | 1.4604 | 1.1455 |
| 30.5  | 1.4829 | 1.4913 | 1.4444 | 1.4409 | 1.4753 | 1.3314 | 1.4602 | 1.1554 |
| 30.75 | 1.4823 | 1.4923 | 1.4446 | 1.4404 | 1.4752 | 1.3362 | 1.4584 | 1.165  |
| 31    | 1.4825 | 1.4929 | 1.4466 | 1.4395 | 1.4769 | 1.3423 | 1.4583 | 1.1754 |
| 31.25 | 1.4843 | 1.4939 | 1.448  | 1.4411 | 1.4764 | 1.3487 | 1.4571 | 1.1842 |
| 31.5  | 1.4842 | 1.496  | 1.4475 | 1.4403 | 1.4769 | 1.3549 | 1.4565 | 1.1929 |
| 31.75 | 1.4837 | 1.4956 | 1.4475 | 1.4387 | 1.4785 | 1.3596 | 1.4565 | 1.2024 |
| 32    | 1.4837 | 1.4964 | 1.4488 | 1.4381 | 1.4791 | 1.365  | 1.4561 | 1.2112 |
| 32.25 | 1.4847 | 1.4969 | 1.4483 | 1.439  | 1.4789 | 1.368  | 1.4562 | 1.2209 |
| 32.5  | 1.4848 | 1.4964 | 1.448  | 1.4378 | 1.4802 | 1.3715 | 1.4545 | 1.2296 |
| 32.75 | 1.4858 | 1.4974 | 1.448  | 1.4386 | 1.4807 | 1.3764 | 1.4544 | 1.2386 |
| 33    | 1.4867 | 1.4992 | 1.4467 | 1.4373 | 1.4814 | 1.378  | 1.4545 | 1.2482 |
| 33.25 | 1.4876 | 1.498  | 1.4476 | 1.4362 | 1.4816 | 1.3821 | 1.4541 | 1.2566 |
| 33.5  | 1.4885 | 1.4993 | 1.4481 | 1.4385 | 1.4836 | 1.3845 | 1.4537 | 1.2666 |
| 33.75 | 1.4883 | 1.4994 | 1.4469 | 1.4376 | 1.4831 | 1.387  | 1.4538 | 1.2758 |
| 34    | 1.4888 | 1.4988 | 1.4474 | 1.4377 | 1.4831 | 1.3882 | 1.4532 | 1.2845 |
| 34.25 | 1.4892 | 1.4995 | 1.4471 | 1.4383 | 1.4837 | 1.3909 | 1.4529 | 1.2922 |
| 34.5  | 1.4899 | 1.4996 | 1.4474 | 1.436  | 1.4848 | 1.3918 | 1.4515 | 1.3009 |
| 34.75 | 1.4919 | 1.5003 | 1.4472 | 1.4363 | 1.4846 | 1.3912 | 1.4514 | 1.3092 |
| 35    | 1.492  | 1.5014 | 1.4486 | 1.436  | 1.4863 | 1.3924 | 1.4521 | 1.3174 |
| 35.25 | 1.4922 | 1.502  | 1.4486 | 1.4366 | 1.4864 | 1.3936 | 1.4522 | 1.3245 |
| 35.5  | 1.4933 | 1.5004 | 1.4477 | 1.4367 | 1.4866 | 1.3932 | 1.4519 | 1.3328 |
| 35.75 | 1.4939 | 1.5019 | 1.4479 | 1.4359 | 1.4868 | 1.3941 | 1.4525 | 1.34   |
| 36    | 1.4951 | 1.5018 | 1.4476 | 1.4364 | 1.488  | 1.3944 | 1.4522 | 1.3473 |
| 36.25 | 1.4965 | 1.5015 | 1.4469 | 1.4366 | 1.4882 | 1.3959 | 1.4523 | 1.3543 |
| 36.5  | 1.4976 | 1.5021 | 1.4473 | 1.4353 | 1.4882 | 1.3966 | 1.4529 | 1.3612 |
| 36.75 | 1.4983 | 1.5037 | 1.4481 | 1.4386 | 1.4905 | 1.3998 | 1.4539 | 1.3699 |
| 37    | 1.4992 | 1.5034 | 1.4477 | 1.4366 | 1.4889 | 1.3984 | 1.4518 | 1.3758 |
| 37.25 | 1.4997 | 1.504  | 1.449  | 1.4353 | 1.4892 | 1.3992 | 1.4521 | 1.3829 |
| 37.5  | 1.5011 | 1.5037 | 1.4489 | 1.4362 | 1.4881 | 1.4001 | 1.4509 | 1.3883 |
| 37.75 | 1.502  | 1.505  | 1.4486 | 1.4362 | 1.4885 | 1.4012 | 1.4503 | 1.3951 |
| 38    | 1.5029 | 1.5047 | 1.4475 | 1.4361 | 1.4894 | 1.4013 | 1.4506 | 1.4001 |

|       |        |        |        |        |        |        |        |        |
|-------|--------|--------|--------|--------|--------|--------|--------|--------|
| 38.25 | 1.5029 | 1.5046 | 1.449  | 1.4347 | 1.4888 | 1.4023 | 1.4518 | 1.4032 |
| 38.5  | 1.504  | 1.505  | 1.4481 | 1.4341 | 1.4889 | 1.4026 | 1.4509 | 1.4081 |
| 38.75 | 1.5035 | 1.5042 | 1.448  | 1.434  | 1.488  | 1.4039 | 1.4514 | 1.41   |
| 39    | 1.5042 | 1.505  | 1.4488 | 1.4337 | 1.4881 | 1.4036 | 1.4513 | 1.4148 |
| 39.25 | 1.5058 | 1.5049 | 1.4482 | 1.4339 | 1.4888 | 1.4042 | 1.4508 | 1.4177 |
| 39.5  | 1.507  | 1.5052 | 1.4485 | 1.4333 | 1.4889 | 1.4048 | 1.4513 | 1.4187 |
| 39.75 | 1.5073 | 1.506  | 1.4484 | 1.4333 | 1.4876 | 1.406  | 1.4509 | 1.4187 |
| 40    | 1.5077 | 1.5062 | 1.4489 | 1.4335 | 1.488  | 1.4063 | 1.4502 | 1.42   |
| 40.25 | 1.5093 | 1.5063 | 1.4496 | 1.4341 | 1.4893 | 1.4072 | 1.4508 | 1.4193 |
| 40.5  | 1.5096 | 1.506  | 1.4489 | 1.4344 | 1.4882 | 1.4063 | 1.45   | 1.4188 |
| 40.75 | 1.5108 | 1.5059 | 1.4494 | 1.4334 | 1.4885 | 1.4072 | 1.4504 | 1.4184 |
| 41    | 1.5129 | 1.5053 | 1.4485 | 1.4333 | 1.4883 | 1.4084 | 1.4505 | 1.4172 |
| 41.25 | 1.5127 | 1.5048 | 1.4491 | 1.4328 | 1.4888 | 1.4078 | 1.4514 | 1.4161 |
| 41.5  | 1.513  | 1.5052 | 1.4495 | 1.4322 | 1.4877 | 1.4081 | 1.4506 | 1.4148 |
| 41.75 | 1.513  | 1.5045 | 1.4496 | 1.4322 | 1.4884 | 1.4084 | 1.4502 | 1.4133 |
| 42    | 1.5143 | 1.506  | 1.4492 | 1.4322 | 1.488  | 1.4077 | 1.4499 | 1.4132 |
| 42.25 | 1.5164 | 1.506  | 1.4512 | 1.4327 | 1.489  | 1.4089 | 1.4516 | 1.4125 |
| 42.5  | 1.5166 | 1.5062 | 1.4516 | 1.4319 | 1.4893 | 1.4091 | 1.4507 | 1.4108 |
| 42.75 | 1.518  | 1.506  | 1.4518 | 1.4325 | 1.4881 | 1.4089 | 1.4506 | 1.4093 |
| 43    | 1.5154 | 1.5053 | 1.4522 | 1.4331 | 1.4907 | 1.409  | 1.4518 | 1.4101 |
| 43.25 | 1.5129 | 1.5059 | 1.4522 | 1.4324 | 1.4906 | 1.4103 | 1.4518 | 1.4094 |
| 43.5  | 1.5111 | 1.5064 | 1.4527 | 1.433  | 1.4887 | 1.4106 | 1.4514 | 1.4082 |
| 43.75 | 1.5114 | 1.5084 | 1.453  | 1.4327 | 1.4903 | 1.4107 | 1.4527 | 1.4087 |
| 44    | 1.5125 | 1.5078 | 1.4529 | 1.4332 | 1.4914 | 1.4113 | 1.4525 | 1.4081 |
| 44.25 | 1.5102 | 1.5073 | 1.4529 | 1.4335 | 1.4918 | 1.4112 | 1.4525 | 1.4077 |
| 44.5  | 1.5105 | 1.5065 | 1.4523 | 1.4342 | 1.4909 | 1.4117 | 1.4525 | 1.4083 |
| 44.75 | 1.5104 | 1.5065 | 1.454  | 1.4332 | 1.4912 | 1.4113 | 1.4532 | 1.4086 |
| 45    | 1.5092 | 1.5064 | 1.4543 | 1.4341 | 1.49   | 1.411  | 1.4535 | 1.4077 |
| 45.25 | 1.5105 | 1.5057 | 1.4541 | 1.4328 | 1.4908 | 1.4117 | 1.4548 | 1.4067 |
| 45.5  | 1.5103 | 1.5065 | 1.4557 | 1.4339 | 1.4905 | 1.4127 | 1.454  | 1.4073 |
| 45.75 | 1.51   | 1.5067 | 1.4559 | 1.4334 | 1.4915 | 1.4122 | 1.4551 | 1.4072 |
| 46    | 1.5108 | 1.5061 | 1.4561 | 1.4337 | 1.4914 | 1.4111 | 1.455  | 1.4073 |
| 46.25 | 1.5109 | 1.5064 | 1.456  | 1.4336 | 1.4911 | 1.4133 | 1.4551 | 1.4079 |
| 46.5  | 1.511  | 1.5069 | 1.4571 | 1.4349 | 1.4915 | 1.4122 | 1.4558 | 1.4072 |
| 46.75 | 1.511  | 1.5052 | 1.4577 | 1.4333 | 1.4905 | 1.4114 | 1.455  | 1.4073 |
| 47    | 1.5111 | 1.5059 | 1.4574 | 1.4332 | 1.4916 | 1.4114 | 1.4562 | 1.4081 |
| 47.25 | 1.5102 | 1.5042 | 1.4571 | 1.4342 | 1.4919 | 1.4119 | 1.4558 | 1.4082 |
| 47.5  | 1.5112 | 1.5044 | 1.4583 | 1.4343 | 1.4922 | 1.4125 | 1.457  | 1.4085 |
| 47.75 | 1.5109 | 1.5036 | 1.4575 | 1.4328 | 1.4909 | 1.4132 | 1.4564 | 1.4088 |
| 48    | 1.511  | 1.5046 | 1.4582 | 1.434  | 1.4918 | 1.4124 | 1.4568 | 1.4089 |
| 48.25 | 1.511  | 1.5042 | 1.4587 | 1.4332 | 1.4913 | 1.412  | 1.4573 | 1.4099 |
| 48.5  | 1.5111 | 1.504  | 1.4592 | 1.4323 | 1.4907 | 1.4124 | 1.4578 | 1.4096 |

|       |        |        |        |        |        |        |        |        |
|-------|--------|--------|--------|--------|--------|--------|--------|--------|
| 48.75 | 1.5107 | 1.5019 | 1.4578 | 1.4325 | 1.4908 | 1.4114 | 1.458  | 1.4092 |
| 49    | 1.5112 | 1.5026 | 1.4586 | 1.4324 | 1.4911 | 1.4121 | 1.4586 | 1.4094 |
| 49.25 | 1.5109 | 1.5034 | 1.4604 | 1.4319 | 1.4902 | 1.412  | 1.4569 | 1.4104 |
| 49.5  | 1.5094 | 1.504  | 1.4603 | 1.4328 | 1.4908 | 1.413  | 1.4576 | 1.4107 |
| 49.75 | 1.5105 | 1.5038 | 1.4602 | 1.4315 | 1.4903 | 1.4127 | 1.4591 | 1.4127 |

|   | <b>C14</b>   | <b>C15</b>    | <b>C16</b>    |
|---|--------------|---------------|---------------|
|   | <b>RAD 3</b> | <b>RAD 10</b> | <b>RAD 30</b> |
|   | 0.142        | 0.1429        | 0.1534        |
|   | 0.1314       | 0.1347        | 0.1438        |
|   | 0.1294       | 0.1328        | 0.1417        |
|   | 0.1266       | 0.1303        | 0.139         |
|   | 0.1269       | 0.1302        | 0.1394        |
| — | 0.127        | 0.1303        | 0.1387        |
|   | 0.1272       | 0.13          | 0.1383        |
|   | 0.1281       | 0.1313        | 0.138         |
|   | 0.1289       | 0.1316        | 0.1386        |
|   | 0.1295       | 0.1322        | 0.1397        |
|   | 0.1309       | 0.1332        | 0.1406        |
|   | 0.1328       | 0.1344        | 0.1418        |
|   | 0.134        | 0.1358        | 0.1429        |
|   | 0.136        | 0.1374        | 0.1439        |
|   | 0.1374       | 0.1392        | 0.1454        |
|   | 0.14         | 0.1409        | 0.1472        |
|   | 0.1425       | 0.1425        | 0.1488        |
| ) | 0.1444       | 0.1445        | 0.1507        |
|   | 0.1474       | 0.1469        | 0.1533        |
|   | 0.1506       | 0.1489        | 0.1546        |
|   | 0.1537       | 0.1516        | 0.1566        |
|   | 0.1573       | 0.1542        | 0.1589        |
|   | 0.16         | 0.157         | 0.1617        |
| ) | 0.1641       | 0.1597        | 0.1641        |
|   | 0.1679       | 0.1622        | 0.1664        |
| ) | 0.1729       | 0.1653        | 0.169         |
|   | 0.1767       | 0.1691        | 0.1723        |

|        |        |        |
|--------|--------|--------|
| .1817  | 0.1723 | 0.1751 |
| .1867  | 0.1754 | 0.1774 |
| .1913  | 0.1784 | 0.1806 |
| .1968  | 0.1822 | 0.1838 |
| .2021  | 0.1858 | 0.1864 |
| .2082  | 0.1887 | 0.1892 |
| .2148  | 0.1929 | 0.1916 |
| .2215  | 0.1976 | 0.196  |
| .2285  | 0.2015 | 0.1994 |
| .237   | 0.2062 | 0.2026 |
| .2443  | 0.2102 | 0.2053 |
| .2525  | 0.2156 | 0.2085 |
| .262   | 0.2194 | 0.2128 |
| 0.2708 | 0.2245 | 0.2149 |
| 0.2797 | 0.23   | 0.2189 |
| 0.2897 | 0.2348 | 0.2224 |
| 0.2996 | 0.2414 | 0.2263 |
| 0.3103 | 0.2473 | 0.2302 |
| 0.3205 | 0.2524 | 0.2343 |
| 0.3327 | 0.2589 | 0.2403 |
| 0.3449 | 0.266  | 0.2445 |
| 0.3595 | 0.2731 | 0.2477 |
| 0.3719 | 0.2811 | 0.2514 |
| 0.3849 | 0.2878 | 0.2546 |
| 0.3997 | 0.296  | 0.2568 |
| 0.4145 | 0.3055 | 0.261  |
| 0.4302 | 0.3137 | 0.2659 |
| 0.4493 | 0.3235 | 0.2708 |
| 0.4709 | 0.334  | 0.2753 |
| 0.4903 | 0.3436 | 0.2794 |
| 0.5119 | 0.3553 | 0.2846 |
| 0.5345 | 0.3674 | 0.29   |
| 0.5572 | 0.3791 | 0.2947 |
| 0.5813 | 0.3925 | 0.3007 |
| 0.6064 | 0.4087 | 0.311  |
| 0.6316 | 0.4254 | 0.3184 |
| 0.6541 | 0.4384 | 0.3256 |
| 0.6515 | 0.4331 | 0.3205 |
| 0.6625 | 0.4385 | 0.3199 |
| 0.6836 | 0.4528 | 0.3288 |
| 0.7069 | 0.4639 | 0.3347 |
| 0.7262 | 0.4766 | 0.3413 |

|        |        |        |
|--------|--------|--------|
| 0.745  | 0.4886 | 0.3466 |
| 0.7643 | 0.4981 | 0.3513 |
| 0.782  | 0.5113 | 0.3567 |
| 0.7992 | 0.5231 | 0.3635 |
| 0.8163 | 0.5357 | 0.3685 |
| 0.8328 | 0.5481 | 0.3741 |
| 0.8495 | 0.5603 | 0.3808 |
| 0.864  | 0.5736 | 0.3866 |
| 0.8783 | 0.5857 | 0.3932 |
| 0.8918 | 0.599  | 0.3997 |
| 0.9037 | 0.6124 | 0.4059 |
| 0.9178 | 0.6242 | 0.4131 |
| 0.9309 | 0.6366 | 0.4202 |
| 0.9438 | 0.6478 | 0.4272 |
| 0.9532 | 0.659  | 0.4331 |
| 0.9637 | 0.6696 | 0.4411 |
| 0.9768 | 0.6823 | 0.4465 |
| 0.9863 | 0.6935 | 0.4538 |
| 0.9959 | 0.7037 | 0.4605 |
| 1.0061 | 0.7143 | 0.4669 |
| 1.0163 | 0.7236 | 0.4742 |
| 1.0235 | 0.7344 | 0.481  |
| 1.0323 | 0.7446 | 0.4868 |
| 1.0403 | 0.7548 | 0.4943 |
| 1.0499 | 0.764  | 0.5016 |
| 1.0592 | 0.7732 | 0.5078 |
| 1.0665 | 0.7831 | 0.5151 |
| 1.0755 | 0.793  | 0.5213 |
| 1.0823 | 0.8011 | 0.5278 |
| 1.0918 | 0.8093 | 0.5343 |
| 1.0977 | 0.8187 | 0.5412 |
| 1.1069 | 0.8255 | 0.5486 |
| 1.1137 | 0.8322 | 0.556  |
| 1.1224 | 0.8389 | 0.5622 |
| 1.1306 | 0.8472 | 0.57   |
| 1.1365 | 0.8536 | 0.5757 |
| 1.1448 | 0.8618 | 0.5812 |
| 1.1513 | 0.8671 | 0.5881 |
| 1.158  | 0.8737 | 0.5934 |
| 1.1668 | 0.8796 | 0.5995 |
| 1.1723 | 0.8882 | 0.6053 |
| 1.179  | 0.8937 | 0.6124 |

|        |        |        |
|--------|--------|--------|
| 1.187  | 0.8991 | 0.6186 |
| 1.1927 | 0.9049 | 0.624  |
| 1.1997 | 0.9124 | 0.6295 |
| 1.208  | 0.9175 | 0.6355 |
| 1.2158 | 0.9246 | 0.6407 |
| 1.2202 | 0.9321 | 0.6467 |
| 1.2268 | 0.9374 | 0.6522 |
| 1.2347 | 0.9456 | 0.6579 |
| 1.2403 | 0.951  | 0.6637 |
| 1.2469 | 0.9576 | 0.6694 |
| 1.2538 | 0.9644 | 0.6761 |
| 1.2594 | 0.9722 | 0.6792 |
| 1.2669 | 0.9773 | 0.6844 |
| 1.2732 | 0.9852 | 0.6889 |
| 1.28   | 0.9916 | 0.6931 |
| 1.2848 | 0.9973 | 0.6999 |
| 1.2911 | 1.0042 | 0.7038 |
| 1.2942 | 1.0119 | 0.7085 |
| 1.3005 | 1.0175 | 0.7133 |
| 1.3051 | 1.0247 | 0.7173 |
| 1.3106 | 1.0296 | 0.722  |
| 1.3155 | 1.0357 | 0.7262 |
| 1.3204 | 1.043  | 0.7302 |
| 1.3249 | 1.0496 | 0.7352 |
| 1.3283 | 1.0557 | 0.7386 |
| 1.3329 | 1.0626 | 0.7436 |
| 1.3357 | 1.0701 | 0.7472 |
| 1.337  | 1.0768 | 0.7513 |
| 1.339  | 1.0838 | 0.7557 |
| 1.3431 | 1.0884 | 0.7607 |
| 1.344  | 1.0968 | 0.7643 |
| 1.3442 | 1.1037 | 0.7689 |
| 1.3471 | 1.1096 | 0.7733 |
| 1.3472 | 1.1159 | 0.7779 |
| 1.347  | 1.1214 | 0.7828 |
| 1.3474 | 1.1286 | 0.7866 |
| 1.3503 | 1.1371 | 0.7946 |
| 1.3489 | 1.142  | 0.7967 |
| 1.347  | 1.1465 | 0.7996 |
| 1.3461 | 1.1551 | 0.8038 |
| 1.3464 | 1.16   | 0.8071 |
| 1.3466 | 1.1663 | 0.812  |



|        |        |        |
|--------|--------|--------|
| 1.3462 | 1.1723 | 0.8153 |
| 1.3463 | 1.1774 | 0.8215 |
| 1.345  | 1.1831 | 0.8245 |
| 1.3456 | 1.1904 | 0.8282 |
| 1.3447 | 1.1953 | 0.8315 |
| 1.3439 | 1.2009 | 0.8362 |
| 1.3449 | 1.2072 | 0.8421 |
| 1.3449 | 1.2131 | 0.8452 |
| 1.3448 | 1.2194 | 0.8511 |
| 1.3448 | 1.2255 | 0.8542 |
| 1.3444 | 1.2298 | 0.8581 |
| 1.345  | 1.2347 | 0.8624 |
| 1.3445 | 1.24   | 0.8657 |
| 1.3451 | 1.2473 | 0.8714 |
| 1.3442 | 1.2512 | 0.8747 |
| 1.344  | 1.256  | 0.8786 |
| 1.3443 | 1.2619 | 0.8829 |
| 1.3446 | 1.2672 | 0.8872 |
| 1.3437 | 1.2718 | 0.8917 |
| 1.3442 | 1.2773 | 0.8946 |
| 1.3443 | 1.2809 | 0.8992 |
| 1.3444 | 1.2859 | 0.9036 |
| 1.3447 | 1.2922 | 0.9072 |
| 1.3444 | 1.2959 | 0.9113 |
| 1.3441 | 1.3004 | 0.9167 |
| 1.3436 | 1.3043 | 0.92   |
| 1.3434 | 1.3064 | 0.9227 |
| 1.344  | 1.3112 | 0.9266 |
| 1.3437 | 1.3146 | 0.9317 |
| 1.3447 | 1.3169 | 0.9372 |
| 1.3429 | 1.3193 | 0.9406 |
| 1.3421 | 1.3221 | 0.9461 |
| 1.3438 | 1.3233 | 0.9501 |
| 1.3434 | 1.3254 | 0.9534 |
| 1.3428 | 1.3279 | 0.9572 |
| 1.3429 | 1.3286 | 0.9623 |
| 1.3437 | 1.3287 | 0.9665 |
| 1.3426 | 1.3297 | 0.9706 |
| 1.3433 | 1.332  | 0.9732 |
| 1.3428 | 1.3312 | 0.9772 |
| 1.343  | 1.3319 | 0.9816 |
| 1.3424 | 1.3334 | 0.985  |

|        |        |        |
|--------|--------|--------|
| 1.3421 | 1.3339 | 0.9906 |
| 1.3431 | 1.3334 | 0.9946 |
| 1.3431 | 1.3333 | 0.998  |
| 1.3422 | 1.3342 | 1.003  |
| 1.3427 | 1.3338 | 1.0053 |

**D17                      D18                      D19                      D20                      D21                      D22**

| <b>TIME</b> | <b>WT</b> | <b>WT(GA3)</b> | <b>WT(RAD3)</b> | <b>NO DRUG</b> | <b>GA 3uM</b> | <b>GA 7uM</b> | <b>NOVO 100</b> | <b>NOVO 250</b> | <b>RAD 3</b> |
|-------------|-----------|----------------|-----------------|----------------|---------------|---------------|-----------------|-----------------|--------------|
| 0           | 0.1894    | 0.2051         | 0.1892          | 0.1434         | 0.1364        | 0.1265        | 0.1954          | 1.2179          | 0.1193       |
| 0.25        | 0.1844    | 0.1929         | 0.1812          | 0.1414         | 0.1363        | 0.1239        | 0.186           | 1.1456          | 0.1184       |
| 0.5         | 0.1833    | 0.1912         | 0.1787          | 0.1416         | 0.1356        | 0.1237        | 0.1853          | 0.5092          | 0.1187       |
| 0.75        | 0.1838    | 0.189          | 0.1758          | 0.14           | 0.1336        | 0.1217        | 0.1834          | 0.2877          | 0.1158       |
| 1           | 0.1843    | 0.1877         | 0.1818          | 0.1396         | 0.1332        | 0.1214        | 0.1828          | 0.2672          | 0.115        |
| 1.25        | 0.1867    | 0.1862         | 0.1836          | 0.1398         | 0.1335        | 0.1213        | 0.1826          | 0.2499          | 0.1151       |

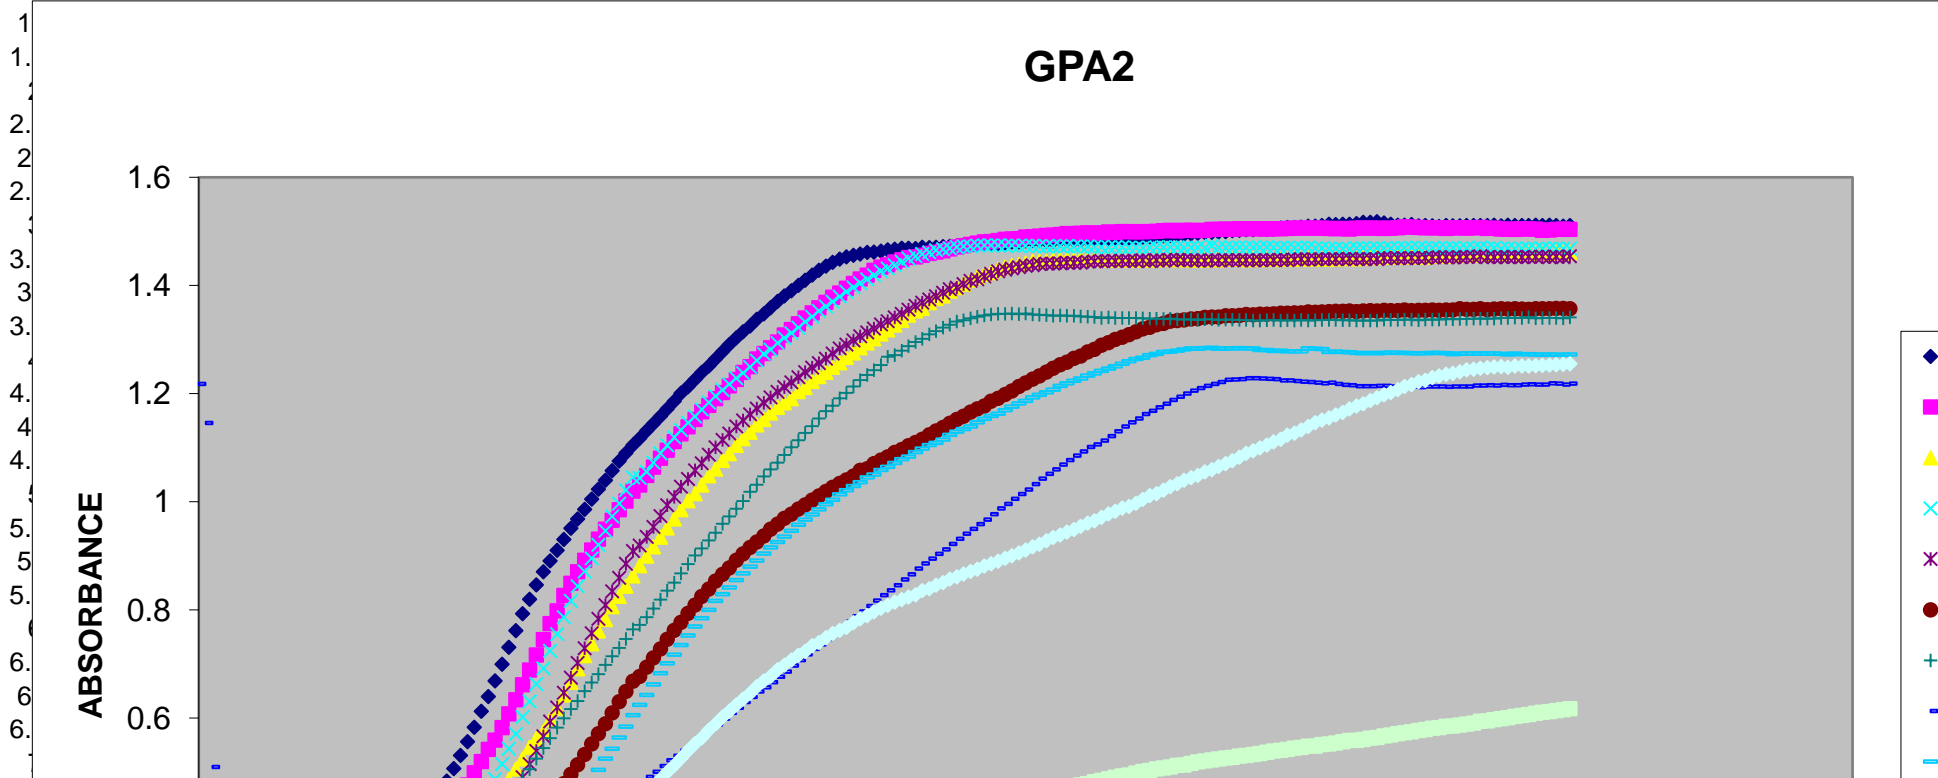

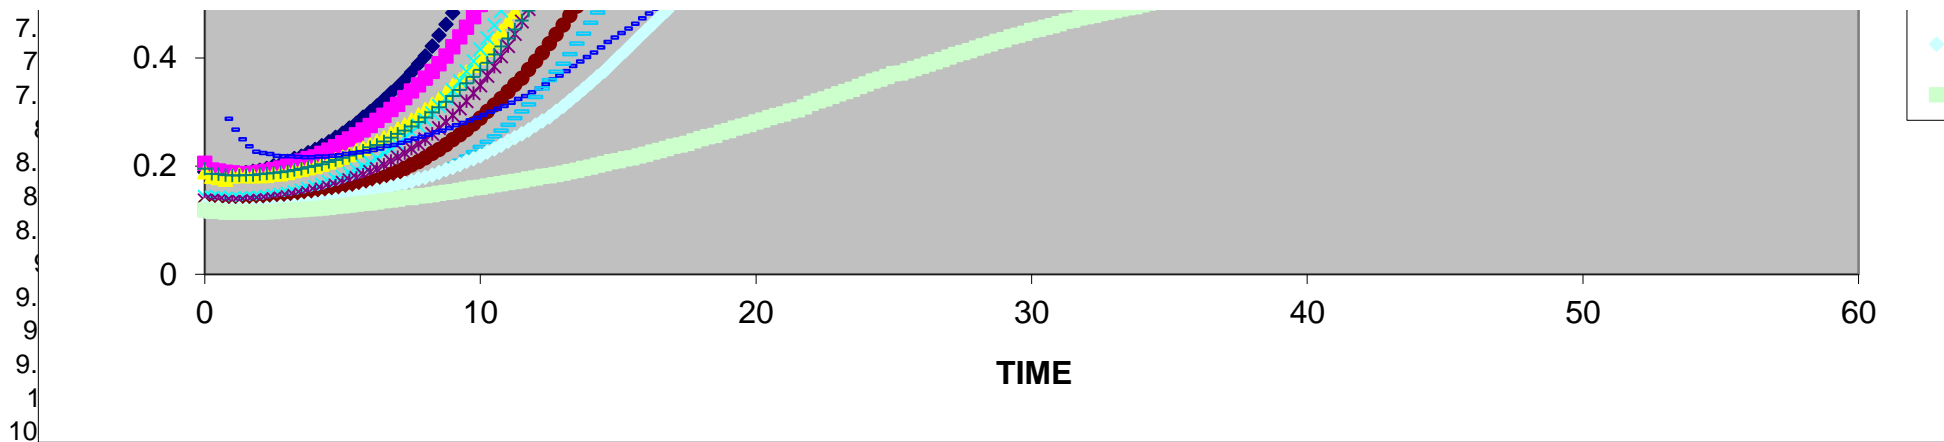

|       |        |        |        |        |        |        |        |        |        |
|-------|--------|--------|--------|--------|--------|--------|--------|--------|--------|
| 10.5  | 0.6397 | 0.5418 | 0.4316 | 0.4605 | 0.3843 | 0.3132 | 0.4063 | 0.3061 | 0.2552 |
| 10.75 | 0.6685 | 0.5593 | 0.4497 | 0.4868 | 0.403  | 0.3251 | 0.4212 | 0.3112 | 0.2659 |
| 11    | 0.6992 | 0.5825 | 0.4678 | 0.5149 | 0.4221 | 0.3377 | 0.4363 | 0.3171 | 0.2764 |
| 11.25 | 0.7307 | 0.6075 | 0.4857 | 0.5434 | 0.4445 | 0.3507 | 0.4526 | 0.3241 | 0.289  |
| 11.5  | 0.7614 | 0.6339 | 0.5059 | 0.5702 | 0.4672 | 0.3626 | 0.4693 | 0.3297 | 0.3013 |
| 11.75 | 0.7927 | 0.6618 | 0.5242 | 0.6016 | 0.4905 | 0.3784 | 0.4877 | 0.3365 | 0.3142 |
| 12    | 0.8194 | 0.6889 | 0.5464 | 0.6308 | 0.5149 | 0.3941 | 0.5051 | 0.3436 | 0.3279 |
| 12.25 | 0.8459 | 0.7168 | 0.5622 | 0.6629 | 0.5393 | 0.4096 | 0.525  | 0.3517 | 0.3439 |
| 12.5  | 0.8706 | 0.7448 | 0.5743 | 0.6917 | 0.5662 | 0.4267 | 0.5441 | 0.3606 | 0.3591 |
| 12.75 | 0.8904 | 0.7744 | 0.5968 | 0.7243 | 0.5937 | 0.4438 | 0.5626 | 0.3675 | 0.3743 |
| 13    | 0.9099 | 0.7982 | 0.6186 | 0.7551 | 0.6194 | 0.4609 | 0.582  | 0.3758 | 0.3896 |
| 13.25 | 0.9301 | 0.8269 | 0.6426 | 0.7864 | 0.647  | 0.4785 | 0.5997 | 0.3853 | 0.4068 |
| 13.5  | 0.9508 | 0.849  | 0.6665 | 0.8163 | 0.6744 | 0.4957 | 0.6167 | 0.3933 | 0.4267 |
| 13.75 | 0.9679 | 0.8707 | 0.6913 | 0.844  | 0.702  | 0.5136 | 0.6313 | 0.4015 | 0.4451 |
| 14    | 0.986  | 0.8918 | 0.7152 | 0.8712 | 0.7292 | 0.5324 | 0.6497 | 0.4103 | 0.465  |
| 14.25 | 1.0047 | 0.9106 | 0.7372 | 0.8952 | 0.7569 | 0.5519 | 0.6656 | 0.4196 | 0.4843 |
| 14.5  | 1.0233 | 0.9308 | 0.7608 | 0.9201 | 0.7835 | 0.5713 | 0.6811 | 0.4295 | 0.5039 |
| 14.75 | 1.0397 | 0.9491 | 0.7825 | 0.9462 | 0.8091 | 0.5894 | 0.6984 | 0.4378 | 0.5247 |
| 15    | 1.0577 | 0.966  | 0.8057 | 0.9727 | 0.8341 | 0.6096 | 0.7145 | 0.4462 | 0.5431 |
| 15.25 | 1.0753 | 0.9853 | 0.8251 | 0.9966 | 0.8591 | 0.6302 | 0.7296 | 0.4542 | 0.5638 |
| 15.5  | 1.0897 | 1.0015 | 0.8439 | 1.0216 | 0.8855 | 0.6491 | 0.7461 | 0.4634 | 0.5843 |
| 15.75 | 1.1049 | 1.0198 | 0.8628 | 1.0449 | 0.9087 | 0.6679 | 0.7639 | 0.4732 | 0.6054 |
| 16    | 1.1171 | 1.031  | 0.8817 | 1.0436 | 0.9188 | 0.6769 | 0.7724 | 0.4825 | 0.6243 |
| 16.25 | 1.1316 | 1.0487 | 0.8996 | 1.0552 | 0.9348 | 0.6943 | 0.7866 | 0.4912 | 0.6428 |
| 16.5  | 1.1443 | 1.0637 | 0.9165 | 1.0725 | 0.9534 | 0.7113 | 0.8021 | 0.5008 | 0.662  |
| 16.75 | 1.1579 | 1.0806 | 0.9342 | 1.0894 | 0.9736 | 0.7278 | 0.8189 | 0.5111 | 0.6828 |
| 17    | 1.1715 | 1.0952 | 0.9517 | 1.1042 | 0.9938 | 0.7455 | 0.8356 | 0.5217 | 0.7014 |
| 17.25 | 1.1858 | 1.1114 | 0.9682 | 1.1189 | 1.009  | 0.7621 | 0.8502 | 0.5299 | 0.7174 |
| 17.5  | 1.2004 | 1.1256 | 0.9855 | 1.1324 | 1.0277 | 0.7767 | 0.8672 | 0.5394 | 0.7349 |

|       |        |        |        |        |        |        |        |        |        |
|-------|--------|--------|--------|--------|--------|--------|--------|--------|--------|
| 17.75 | 1.2123 | 1.1388 | 1.0016 | 1.1464 | 1.0423 | 0.7933 | 0.8844 | 0.5492 | 0.7524 |
| 18    | 1.2261 | 1.1522 | 1.015  | 1.1574 | 1.0583 | 0.8088 | 0.9004 | 0.5592 | 0.7692 |
| 18.25 | 1.239  | 1.1664 | 1.0307 | 1.1707 | 1.0712 | 0.8249 | 0.9137 | 0.5684 | 0.7845 |
| 18.5  | 1.251  | 1.1779 | 1.0478 | 1.1832 | 1.0872 | 0.8382 | 0.9287 | 0.5785 | 0.8001 |
| 18.75 | 1.2641 | 1.1907 | 1.0607 | 1.1956 | 1.1004 | 0.8533 | 0.9429 | 0.5884 | 0.8163 |
| 19    | 1.2773 | 1.2018 | 1.0765 | 1.2063 | 1.1143 | 0.866  | 0.959  | 0.5991 | 0.8288 |
| 19.25 | 1.2907 | 1.2145 | 1.0891 | 1.2175 | 1.1259 | 0.8778 | 0.9731 | 0.6092 | 0.8414 |
| 19.5  | 1.3032 | 1.2259 | 1.1041 | 1.2283 | 1.1392 | 0.8915 | 0.9869 | 0.6192 | 0.8548 |
| 19.75 | 1.3141 | 1.239  | 1.1166 | 1.2378 | 1.1505 | 0.9035 | 1.0013 | 0.6297 | 0.8672 |
| 20    | 1.3251 | 1.2497 | 1.1283 | 1.2489 | 1.1615 | 0.9155 | 1.0186 | 0.6392 | 0.8799 |
| 20.25 | 1.3374 | 1.2637 | 1.1419 | 1.261  | 1.1723 | 0.9255 | 1.0315 | 0.6491 | 0.8911 |
| 20.5  | 1.3474 | 1.2743 | 1.1521 | 1.2732 | 1.183  | 0.9366 | 1.0465 | 0.6569 | 0.904  |
| 20.75 | 1.3589 | 1.2848 | 1.1637 | 1.2813 | 1.1929 | 0.949  | 1.0598 | 0.6664 | 0.9156 |
| 21    | 1.3704 | 1.2956 | 1.1744 | 1.2933 | 1.2028 | 0.9588 | 1.0723 | 0.6763 | 0.9255 |
| 21.25 | 1.3806 | 1.3083 | 1.1829 | 1.3031 | 1.2117 | 0.9692 | 1.0862 | 0.686  | 0.9356 |
| 21.5  | 1.39   | 1.3184 | 1.1906 | 1.312  | 1.2208 | 0.977  | 1.1008 | 0.6969 | 0.9459 |
| 21.75 | 1.3999 | 1.3289 | 1.2037 | 1.3218 | 1.2304 | 0.9863 | 1.1135 | 0.707  | 0.9573 |
| 22    | 1.4093 | 1.3395 | 1.2116 | 1.3324 | 1.2396 | 0.9939 | 1.1272 | 0.718  | 0.967  |
| 22.25 | 1.4189 | 1.3493 | 1.2223 | 1.3422 | 1.2477 | 1.0031 | 1.1398 | 0.728  | 0.9763 |
| 22.5  | 1.4278 | 1.3589 | 1.2316 | 1.3525 | 1.256  | 1.0106 | 1.1537 | 0.7361 | 0.9858 |
| 22.75 | 1.4356 | 1.369  | 1.2391 | 1.3609 | 1.2647 | 1.0188 | 1.1674 | 0.746  | 0.9951 |
| 23    | 1.4425 | 1.3781 | 1.2485 | 1.3697 | 1.2741 | 1.0269 | 1.1778 | 0.7587 | 1.0033 |
| 23.25 | 1.4488 | 1.3861 | 1.257  | 1.3795 | 1.2836 | 1.0338 | 1.191  | 0.7679 | 1.0137 |
| 23.5  | 1.4527 | 1.3947 | 1.2667 | 1.3883 | 1.2905 | 1.0405 | 1.2011 | 0.778  | 1.0214 |
| 23.75 | 1.4559 | 1.4037 | 1.2752 | 1.3965 | 1.2983 | 1.0476 | 1.2128 | 0.788  | 1.0288 |
| 24    | 1.4583 | 1.4119 | 1.2845 | 1.4041 | 1.3059 | 1.058  | 1.2248 | 0.7973 | 1.036  |
| 24.25 | 1.4609 | 1.4188 | 1.2937 | 1.4111 | 1.3128 | 1.061  | 1.2342 | 0.807  | 1.0448 |
| 24.5  | 1.4615 | 1.4276 | 1.3014 | 1.4188 | 1.3202 | 1.0702 | 1.2434 | 0.8169 | 1.0502 |
| 24.75 | 1.4635 | 1.4341 | 1.3101 | 1.4259 | 1.3278 | 1.077  | 1.2528 | 0.8272 | 1.0588 |
| 25    | 1.466  | 1.4379 | 1.3177 | 1.4314 | 1.3337 | 1.0826 | 1.2683 | 0.8363 | 1.0644 |
| 25.25 | 1.4669 | 1.4431 | 1.3269 | 1.4375 | 1.3409 | 1.0909 | 1.2709 | 0.8458 | 1.0714 |
| 25.5  | 1.4687 | 1.4476 | 1.3358 | 1.4438 | 1.3477 | 1.0965 | 1.2796 | 0.8565 | 1.0787 |
| 25.75 | 1.4687 | 1.4518 | 1.345  | 1.4497 | 1.3551 | 1.1034 | 1.2875 | 0.8659 | 1.0832 |
| 26    | 1.4682 | 1.453  | 1.3526 | 1.4538 | 1.3623 | 1.1093 | 1.2954 | 0.8761 | 1.0915 |
| 26.25 | 1.4704 | 1.4557 | 1.3577 | 1.4582 | 1.3682 | 1.1157 | 1.3014 | 0.8856 | 1.0982 |
| 26.5  | 1.4702 | 1.4595 | 1.368  | 1.4611 | 1.3738 | 1.1237 | 1.3096 | 0.8947 | 1.1049 |
| 26.75 | 1.4706 | 1.4619 | 1.3756 | 1.4654 | 1.38   | 1.1311 | 1.3152 | 0.9037 | 1.109  |
| 27    | 1.4716 | 1.4639 | 1.3808 | 1.4669 | 1.3867 | 1.1374 | 1.3222 | 0.9119 | 1.1147 |
| 27.25 | 1.4725 | 1.4677 | 1.3894 | 1.4688 | 1.3927 | 1.145  | 1.3271 | 0.9221 | 1.1238 |
| 27.5  | 1.473  | 1.4709 | 1.396  | 1.4709 | 1.3959 | 1.152  | 1.3334 | 0.9316 | 1.1299 |
| 27.75 | 1.4747 | 1.4735 | 1.4025 | 1.472  | 1.4024 | 1.1583 | 1.3357 | 0.9407 | 1.1345 |
| 28    | 1.4747 | 1.4758 | 1.4095 | 1.4723 | 1.4083 | 1.1655 | 1.3394 | 0.9498 | 1.1389 |

|       |        |        |        |        |        |        |        |        |        |
|-------|--------|--------|--------|--------|--------|--------|--------|--------|--------|
| 28.25 | 1.4772 | 1.4784 | 1.4156 | 1.474  | 1.4113 | 1.1715 | 1.3418 | 0.9589 | 1.1467 |
| 28.5  | 1.4758 | 1.4806 | 1.4201 | 1.474  | 1.4167 | 1.1772 | 1.3447 | 0.9671 | 1.1532 |
| 28.75 | 1.4763 | 1.4813 | 1.4239 | 1.4739 | 1.4214 | 1.1859 | 1.346  | 0.9771 | 1.1587 |
| 29    | 1.4771 | 1.4829 | 1.4289 | 1.4742 | 1.4263 | 1.1912 | 1.3475 | 0.9874 | 1.1629 |
| 29.25 | 1.4786 | 1.485  | 1.4341 | 1.4735 | 1.429  | 1.1984 | 1.3476 | 0.9959 | 1.1692 |
| 29.5  | 1.4803 | 1.4861 | 1.4367 | 1.4743 | 1.4316 | 1.2049 | 1.3482 | 1.0055 | 1.1759 |
| 29.75 | 1.4807 | 1.4866 | 1.4387 | 1.4729 | 1.4341 | 1.2131 | 1.347  | 1.0145 | 1.1816 |
| 30    | 1.4823 | 1.4892 | 1.4412 | 1.4732 | 1.4363 | 1.2195 | 1.3478 | 1.0228 | 1.1866 |
| 30.25 | 1.4831 | 1.49   | 1.4444 | 1.4737 | 1.4374 | 1.2267 | 1.346  | 1.0323 | 1.1929 |
| 30.5  | 1.4829 | 1.4913 | 1.4444 | 1.4727 | 1.44   | 1.2326 | 1.3458 | 1.0426 | 1.1977 |
| 30.75 | 1.4823 | 1.4923 | 1.4446 | 1.4722 | 1.4403 | 1.24   | 1.3451 | 1.0513 | 1.2024 |
| 31    | 1.4825 | 1.4929 | 1.4466 | 1.4724 | 1.4406 | 1.2468 | 1.3438 | 1.0599 | 1.2071 |
| 31.25 | 1.4843 | 1.4939 | 1.448  | 1.4728 | 1.441  | 1.2532 | 1.3442 | 1.0688 | 1.2145 |
| 31.5  | 1.4842 | 1.496  | 1.4475 | 1.4728 | 1.4419 | 1.2579 | 1.344  | 1.077  | 1.2191 |
| 31.75 | 1.4837 | 1.4956 | 1.4475 | 1.4716 | 1.4417 | 1.2653 | 1.3438 | 1.085  | 1.2235 |
| 32    | 1.4837 | 1.4964 | 1.4488 | 1.472  | 1.4423 | 1.2692 | 1.3425 | 1.0932 | 1.2277 |
| 32.25 | 1.4847 | 1.4969 | 1.4483 | 1.472  | 1.4439 | 1.2769 | 1.3421 | 1.101  | 1.2331 |
| 32.5  | 1.4848 | 1.4964 | 1.448  | 1.4708 | 1.4443 | 1.282  | 1.3414 | 1.1058 | 1.2376 |
| 32.75 | 1.4858 | 1.4974 | 1.448  | 1.4708 | 1.4449 | 1.2893 | 1.34   | 1.1133 | 1.2421 |
| 33    | 1.4867 | 1.4992 | 1.4467 | 1.4706 | 1.4448 | 1.294  | 1.3409 | 1.1214 | 1.2464 |
| 33.25 | 1.4876 | 1.498  | 1.4476 | 1.4712 | 1.4453 | 1.2998 | 1.3398 | 1.1302 | 1.2503 |
| 33.5  | 1.4885 | 1.4993 | 1.4481 | 1.4705 | 1.4459 | 1.3041 | 1.3397 | 1.1392 | 1.2552 |
| 33.75 | 1.4883 | 1.4994 | 1.4469 | 1.4702 | 1.4456 | 1.3089 | 1.34   | 1.147  | 1.2601 |
| 34    | 1.4888 | 1.4988 | 1.4474 | 1.4702 | 1.4451 | 1.314  | 1.3398 | 1.1541 | 1.264  |
| 34.25 | 1.4892 | 1.4995 | 1.4471 | 1.4695 | 1.447  | 1.3194 | 1.3394 | 1.1622 | 1.2664 |
| 34.5  | 1.4899 | 1.4996 | 1.4474 | 1.4699 | 1.4453 | 1.3227 | 1.3384 | 1.168  | 1.2709 |
| 34.75 | 1.4919 | 1.5003 | 1.4472 | 1.4704 | 1.4471 | 1.327  | 1.3384 | 1.1748 | 1.2736 |
| 35    | 1.492  | 1.5014 | 1.4486 | 1.4703 | 1.4456 | 1.3299 | 1.3378 | 1.1813 | 1.2769 |
| 35.25 | 1.4922 | 1.502  | 1.4486 | 1.4707 | 1.4476 | 1.334  | 1.3383 | 1.1882 | 1.2776 |
| 35.5  | 1.4933 | 1.5004 | 1.4477 | 1.4706 | 1.4472 | 1.3351 | 1.3375 | 1.1944 | 1.2794 |
| 35.75 | 1.4939 | 1.5019 | 1.4479 | 1.4696 | 1.4464 | 1.3364 | 1.337  | 1.2003 | 1.2817 |
| 36    | 1.4951 | 1.5018 | 1.4476 | 1.4701 | 1.447  | 1.338  | 1.3376 | 1.2053 | 1.2833 |
| 36.25 | 1.4965 | 1.5015 | 1.4469 | 1.4698 | 1.4461 | 1.3388 | 1.3362 | 1.2102 | 1.2827 |
| 36.5  | 1.4976 | 1.5021 | 1.4473 | 1.4694 | 1.4459 | 1.341  | 1.3371 | 1.2143 | 1.2838 |
| 36.75 | 1.4983 | 1.5037 | 1.4481 | 1.4732 | 1.447  | 1.3417 | 1.3372 | 1.2181 | 1.2845 |
| 37    | 1.4992 | 1.5034 | 1.4477 | 1.47   | 1.4464 | 1.3416 | 1.3364 | 1.2213 | 1.283  |
| 37.25 | 1.4997 | 1.504  | 1.449  | 1.47   | 1.4469 | 1.3437 | 1.3367 | 1.2254 | 1.2836 |
| 37.5  | 1.5011 | 1.5037 | 1.4489 | 1.4702 | 1.4462 | 1.344  | 1.3369 | 1.2261 | 1.2837 |
| 37.75 | 1.502  | 1.505  | 1.4486 | 1.4703 | 1.4471 | 1.3447 | 1.3362 | 1.2269 | 1.2839 |
| 38    | 1.5029 | 1.5047 | 1.4475 | 1.47   | 1.447  | 1.346  | 1.3362 | 1.2285 | 1.2837 |
| 38.25 | 1.5029 | 1.5046 | 1.449  | 1.47   | 1.4463 | 1.3456 | 1.335  | 1.2287 | 1.2834 |
| 38.5  | 1.504  | 1.505  | 1.4481 | 1.47   | 1.447  | 1.3467 | 1.3351 | 1.2281 | 1.2806 |

|       |        |        |        |        |        |        |        |        |        |
|-------|--------|--------|--------|--------|--------|--------|--------|--------|--------|
| 38.75 | 1.5035 | 1.5042 | 1.448  | 1.4703 | 1.4467 | 1.3471 | 1.3355 | 1.2273 | 1.2806 |
| 39    | 1.5042 | 1.505  | 1.4488 | 1.47   | 1.4467 | 1.3473 | 1.3359 | 1.2264 | 1.2786 |
| 39.25 | 1.5058 | 1.5049 | 1.4482 | 1.4694 | 1.4477 | 1.3485 | 1.3347 | 1.2243 | 1.2792 |
| 39.5  | 1.507  | 1.5052 | 1.4485 | 1.4694 | 1.447  | 1.3487 | 1.3356 | 1.2243 | 1.2784 |
| 39.75 | 1.5073 | 1.506  | 1.4484 | 1.4696 | 1.4478 | 1.349  | 1.3347 | 1.2231 | 1.2779 |
| 40    | 1.5077 | 1.5062 | 1.4489 | 1.4699 | 1.4488 | 1.349  | 1.3362 | 1.2217 | 1.2784 |
| 40.25 | 1.5093 | 1.5063 | 1.4496 | 1.4697 | 1.4483 | 1.3512 | 1.3352 | 1.2213 | 1.2835 |
| 40.5  | 1.5096 | 1.506  | 1.4489 | 1.4686 | 1.4479 | 1.3502 | 1.3356 | 1.2202 | 1.2832 |
| 40.75 | 1.5108 | 1.5059 | 1.4494 | 1.4687 | 1.4484 | 1.351  | 1.3359 | 1.2191 | 1.2826 |
| 41    | 1.5129 | 1.5053 | 1.4485 | 1.468  | 1.4485 | 1.3513 | 1.3362 | 1.22   | 1.2768 |
| 41.25 | 1.5127 | 1.5048 | 1.4491 | 1.4683 | 1.4489 | 1.3521 | 1.336  | 1.218  | 1.2774 |
| 41.5  | 1.513  | 1.5052 | 1.4495 | 1.4674 | 1.4485 | 1.3522 | 1.3357 | 1.2159 | 1.2768 |
| 41.75 | 1.513  | 1.5045 | 1.4496 | 1.4671 | 1.4492 | 1.3528 | 1.3353 | 1.2155 | 1.2762 |
| 42    | 1.5143 | 1.506  | 1.4492 | 1.4688 | 1.4484 | 1.3517 | 1.335  | 1.2139 | 1.2753 |
| 42.25 | 1.5164 | 1.506  | 1.4512 | 1.4691 | 1.4487 | 1.353  | 1.3348 | 1.2137 | 1.2749 |
| 42.5  | 1.5166 | 1.5062 | 1.4516 | 1.4681 | 1.4494 | 1.3534 | 1.3348 | 1.2136 | 1.2751 |
| 42.75 | 1.518  | 1.506  | 1.4518 | 1.4686 | 1.4487 | 1.3525 | 1.3351 | 1.2141 | 1.2749 |
| 43    | 1.5154 | 1.5053 | 1.4522 | 1.4684 | 1.4509 | 1.3537 | 1.3367 | 1.2141 | 1.2751 |
| 43.25 | 1.5129 | 1.5059 | 1.4522 | 1.4689 | 1.4506 | 1.3531 | 1.3364 | 1.2133 | 1.2758 |
| 43.5  | 1.5111 | 1.5064 | 1.4527 | 1.4691 | 1.4501 | 1.3532 | 1.3364 | 1.2132 | 1.2753 |
| 43.75 | 1.5114 | 1.5084 | 1.453  | 1.4696 | 1.4503 | 1.3545 | 1.3368 | 1.2131 | 1.2752 |
| 44    | 1.5125 | 1.5078 | 1.4529 | 1.4697 | 1.4509 | 1.3536 | 1.3365 | 1.2133 | 1.2749 |
| 44.25 | 1.5102 | 1.5073 | 1.4529 | 1.4693 | 1.4505 | 1.3538 | 1.3355 | 1.212  | 1.2749 |
| 44.5  | 1.5105 | 1.5065 | 1.4523 | 1.4692 | 1.4509 | 1.354  | 1.337  | 1.2132 | 1.2744 |
| 44.75 | 1.5104 | 1.5065 | 1.454  | 1.4694 | 1.4513 | 1.3545 | 1.3366 | 1.2129 | 1.2752 |
| 45    | 1.5092 | 1.5064 | 1.4543 | 1.4686 | 1.4523 | 1.354  | 1.3368 | 1.2132 | 1.2751 |
| 45.25 | 1.5105 | 1.5057 | 1.4541 | 1.4687 | 1.4524 | 1.3546 | 1.3377 | 1.2124 | 1.2744 |
| 45.5  | 1.5103 | 1.5065 | 1.4557 | 1.4694 | 1.4518 | 1.3546 | 1.3376 | 1.213  | 1.273  |
| 45.75 | 1.51   | 1.5067 | 1.4559 | 1.4684 | 1.452  | 1.3569 | 1.3382 | 1.2128 | 1.2743 |
| 46    | 1.5108 | 1.5061 | 1.4561 | 1.469  | 1.4528 | 1.3558 | 1.338  | 1.213  | 1.2741 |
| 46.25 | 1.5109 | 1.5064 | 1.456  | 1.4686 | 1.4525 | 1.3558 | 1.3383 | 1.2146 | 1.2738 |
| 46.5  | 1.511  | 1.5069 | 1.4571 | 1.47   | 1.4542 | 1.3571 | 1.3385 | 1.2149 | 1.274  |
| 46.75 | 1.511  | 1.5052 | 1.4577 | 1.469  | 1.4524 | 1.3554 | 1.3383 | 1.2153 | 1.2743 |
| 47    | 1.5111 | 1.5059 | 1.4574 | 1.4696 | 1.4522 | 1.3565 | 1.3388 | 1.2149 | 1.2743 |
| 47.25 | 1.5102 | 1.5042 | 1.4571 | 1.4678 | 1.453  | 1.3569 | 1.34   | 1.2161 | 1.2732 |
| 47.5  | 1.5112 | 1.5044 | 1.4583 | 1.4689 | 1.4523 | 1.3563 | 1.3398 | 1.2153 | 1.272  |
| 47.75 | 1.5109 | 1.5036 | 1.4575 | 1.4679 | 1.453  | 1.3569 | 1.3405 | 1.2156 | 1.274  |
| 48    | 1.511  | 1.5046 | 1.4582 | 1.4682 | 1.4523 | 1.3562 | 1.3397 | 1.2168 | 1.2729 |
| 48.25 | 1.511  | 1.5042 | 1.4587 | 1.4679 | 1.4526 | 1.3558 | 1.3413 | 1.2174 | 1.2728 |
| 48.5  | 1.5111 | 1.504  | 1.4592 | 1.4674 | 1.4528 | 1.3567 | 1.3393 | 1.2169 | 1.272  |
| 48.75 | 1.5107 | 1.5019 | 1.4578 | 1.4681 | 1.4532 | 1.3571 | 1.3395 | 1.2167 | 1.2715 |
| 49    | 1.5112 | 1.5026 | 1.4586 | 1.468  | 1.4524 | 1.3566 | 1.3397 | 1.2191 | 1.2722 |

|       |        |        |        |        |        |        |        |        |        |
|-------|--------|--------|--------|--------|--------|--------|--------|--------|--------|
| 49.25 | 1.5109 | 1.5034 | 1.4604 | 1.4679 | 1.4534 | 1.3574 | 1.3398 | 1.2182 | 1.2718 |
| 49.5  | 1.5094 | 1.504  | 1.4603 | 1.4681 | 1.4524 | 1.3573 | 1.3391 | 1.2169 | 1.2715 |
| 49.75 | 1.5105 | 1.5038 | 1.4602 | 1.468  | 1.4537 | 1.3566 | 1.3407 | 1.2184 | 1.2724 |



**D23****D24****RAD 10**

0.1269  
0.1227  
0.1233  
0.1209  
0.1209  
0.121

**RAD 30**

0.1188  
0.1165  
0.1174  
0.115  
0.1148  
0.1147  
0.1148  
0.115  
0.1149  
0.1155  
0.1161  
0.1173  
0.1182  
0.1189  
0.1195  
0.1209  
0.1215  
0.1225  
0.1234  
0.1254  
0.1263  
0.1277  
0.1295  
0.1312  
0.1321  
0.1335  
0.1359  
0.1375  
0.1391

WT

WT(GA3)

WT(RAD3)

NO DRUG

GA 3uM

GA 7uM

NOVO 100

NOVO 250

RAD 3

|        |        |
|--------|--------|
| RAD 10 | 0.1417 |
|        | 0.1422 |
| RAD 30 | 0.1449 |
|        | 0.1457 |
|        | 0.1473 |
|        | 0.1499 |
|        | 0.1516 |
|        | 0.1529 |
|        | 0.1551 |
|        | 0.1576 |
|        | 0.1597 |
|        | 0.1611 |
|        | 0.1634 |
| 0.232  | 0.1656 |
| 0.2387 | 0.1672 |
| 0.2462 | 0.1695 |
| 0.2527 | 0.1713 |
| 0.2596 | 0.1735 |
| 0.2669 | 0.1764 |
| 0.2757 | 0.1781 |
| 0.2832 | 0.1808 |
| 0.2913 | 0.1825 |
| 0.3011 | 0.1843 |
| 0.3105 | 0.1872 |
| 0.3211 | 0.1897 |
| 0.3322 | 0.1925 |
| 0.3426 | 0.1957 |
| 0.3538 | 0.1981 |
| 0.3659 | 0.2016 |
| 0.3758 | 0.2046 |
| 0.389  | 0.2084 |
| 0.4011 | 0.2101 |
| 0.4132 | 0.2134 |
| 0.4256 | 0.2155 |
| 0.4386 | 0.219  |
| 0.4502 | 0.2218 |
| 0.463  | 0.2261 |
| 0.475  | 0.229  |
| 0.487  | 0.2324 |
| 0.4999 | 0.2368 |
| 0.5125 | 0.2392 |
| 0.5253 | 0.2419 |

|        |        |
|--------|--------|
| 0.5394 | 0.2465 |
| 0.5525 | 0.2508 |
| 0.5632 | 0.2543 |
| 0.5774 | 0.257  |
| 0.589  | 0.2626 |
| 0.6015 | 0.2659 |
| 0.6126 | 0.2705 |
| 0.6242 | 0.2742 |
| 0.6351 | 0.2771 |
| 0.6457 | 0.2816 |
| 0.6581 | 0.2852 |
| 0.6688 | 0.29   |
| 0.677  | 0.2932 |
| 0.6893 | 0.2965 |
| 0.6974 | 0.3015 |
| 0.7074 | 0.3043 |
| 0.7157 | 0.3093 |
| 0.7231 | 0.316  |
| 0.7335 | 0.3204 |
| 0.7396 | 0.3245 |
| 0.7483 | 0.3287 |
| 0.7561 | 0.3339 |
| 0.7624 | 0.3377 |
| 0.7673 | 0.342  |
| 0.7766 | 0.3472 |
| 0.7833 | 0.3523 |
| 0.7892 | 0.3571 |
| 0.7965 | 0.3611 |
| 0.8032 | 0.3655 |
| 0.8082 | 0.371  |
| 0.8141 | 0.3723 |
| 0.8191 | 0.3764 |
| 0.8237 | 0.3805 |
| 0.8279 | 0.3848 |
| 0.8357 | 0.3887 |
| 0.8393 | 0.393  |
| 0.8453 | 0.3968 |
| 0.8505 | 0.4015 |
| 0.8567 | 0.4063 |
| 0.8611 | 0.4102 |
| 0.8661 | 0.4137 |
| 0.8709 | 0.4182 |

|        |        |
|--------|--------|
| 0.875  | 0.4225 |
| 0.8812 | 0.426  |
| 0.8851 | 0.431  |
| 0.8902 | 0.4339 |
| 0.8951 | 0.4391 |
| 0.8998 | 0.442  |
| 0.9056 | 0.4456 |
| 0.9109 | 0.4506 |
| 0.9166 | 0.4531 |
| 0.9213 | 0.4566 |
| 0.9277 | 0.4599 |
| 0.9338 | 0.4634 |
| 0.9383 | 0.4678 |
| 0.9436 | 0.4701 |
| 0.9483 | 0.4738 |
| 0.9547 | 0.4764 |
| 0.9602 | 0.4785 |
| 0.9646 | 0.4821 |
| 0.9712 | 0.4849 |
| 0.9777 | 0.4876 |
| 0.982  | 0.4907 |
| 0.9883 | 0.493  |
| 0.9914 | 0.4949 |
| 0.9968 | 0.4984 |
| 1.0039 | 0.5014 |
| 1.0112 | 0.5028 |
| 1.0146 | 0.5058 |
| 1.0214 | 0.5075 |
| 1.0276 | 0.5097 |
| 1.033  | 0.5123 |
| 1.0399 | 0.5131 |
| 1.0444 | 0.5159 |
| 1.0483 | 0.5188 |
| 1.0553 | 0.5208 |
| 1.059  | 0.5227 |
| 1.0654 | 0.5241 |
| 1.0702 | 0.5261 |
| 1.076  | 0.527  |
| 1.0823 | 0.5294 |
| 1.0895 | 0.5306 |
| 1.0944 | 0.5326 |
| 1.0995 | 0.5343 |

|        |        |
|--------|--------|
| 1.1047 | 0.5366 |
| 1.1107 | 0.5388 |
| 1.1156 | 0.5405 |
| 1.1231 | 0.542  |
| 1.1265 | 0.5441 |
| 1.1326 | 0.5455 |
| 1.1391 | 0.5482 |
| 1.1461 | 0.5479 |
| 1.1508 | 0.5506 |
| 1.1552 | 0.5521 |
| 1.1603 | 0.5539 |
| 1.1654 | 0.5561 |
| 1.1718 | 0.5586 |
| 1.177  | 0.5584 |
| 1.1811 | 0.5603 |
| 1.1871 | 0.563  |
| 1.1921 | 0.5642 |
| 1.1974 | 0.5668 |
| 1.2017 | 0.5684 |
| 1.2073 | 0.5709 |
| 1.2131 | 0.5728 |
| 1.2165 | 0.5745 |
| 1.2218 | 0.5767 |
| 1.2245 | 0.5789 |
| 1.2298 | 0.5808 |
| 1.2325 | 0.5823 |
| 1.2354 | 0.5845 |
| 1.2374 | 0.5855 |
| 1.2405 | 0.5868 |
| 1.2437 | 0.5887 |
| 1.2452 | 0.5906 |
| 1.247  | 0.5941 |
| 1.2482 | 0.5947 |
| 1.2492 | 0.5968 |
| 1.2496 | 0.5987 |
| 1.2484 | 0.6005 |
| 1.2508 | 0.6027 |
| 1.2512 | 0.6048 |
| 1.2512 | 0.6063 |
| 1.2514 | 0.609  |
| 1.2521 | 0.6105 |
| 1.253  | 0.612  |

|        |        |
|--------|--------|
| 1.2535 | 0.6137 |
| 1.2539 | 0.6155 |
| 1.255  | 0.6174 |

HSC82

|      |        |          |          | A1      | A2     | A3     | A4       | A5       |
|------|--------|----------|----------|---------|--------|--------|----------|----------|
| TIME | WT     | WT(GA 3) | WT(RAD3) | NO DRUG | GA 3uM | GA 7uM | NOVO 100 | NOVO 250 |
| 0    | 0.1894 | 0.2051   | 0.1892   | 0.1643  | 0.1571 | 0.1491 | 0.1957   | 0.243    |
| 0.25 | 0.1844 | 0.1929   | 0.1812   | 0.1532  | 0.1482 | 0.1374 | 0.2      | 0.2453   |
| 0.5  | 0.1833 | 0.1912   | 0.1787   | 0.1515  | 0.1468 | 0.1341 | 0.2      | 0.2448   |
| 0.75 | 0.1838 | 0.189    | 0.1758   | 0.1474  | 0.1432 | 0.132  | 0.1971   | 0.2479   |
| 1    | 0.1843 | 0.1877   | 0.1818   | 0.1478  | 0.1446 | 0.1316 | 0.1975   | 0.2481   |
| 1.25 | 0.1867 | 0.1862   | 0.1836   | 0.1477  | 0.144  | 0.1326 | 0.195    | 0.2461   |
| 1.5  | 0.188  | 0.186    | 0.1823   | 0.1486  | 0.1449 | 0.1327 | 0.1959   | 0.2473   |

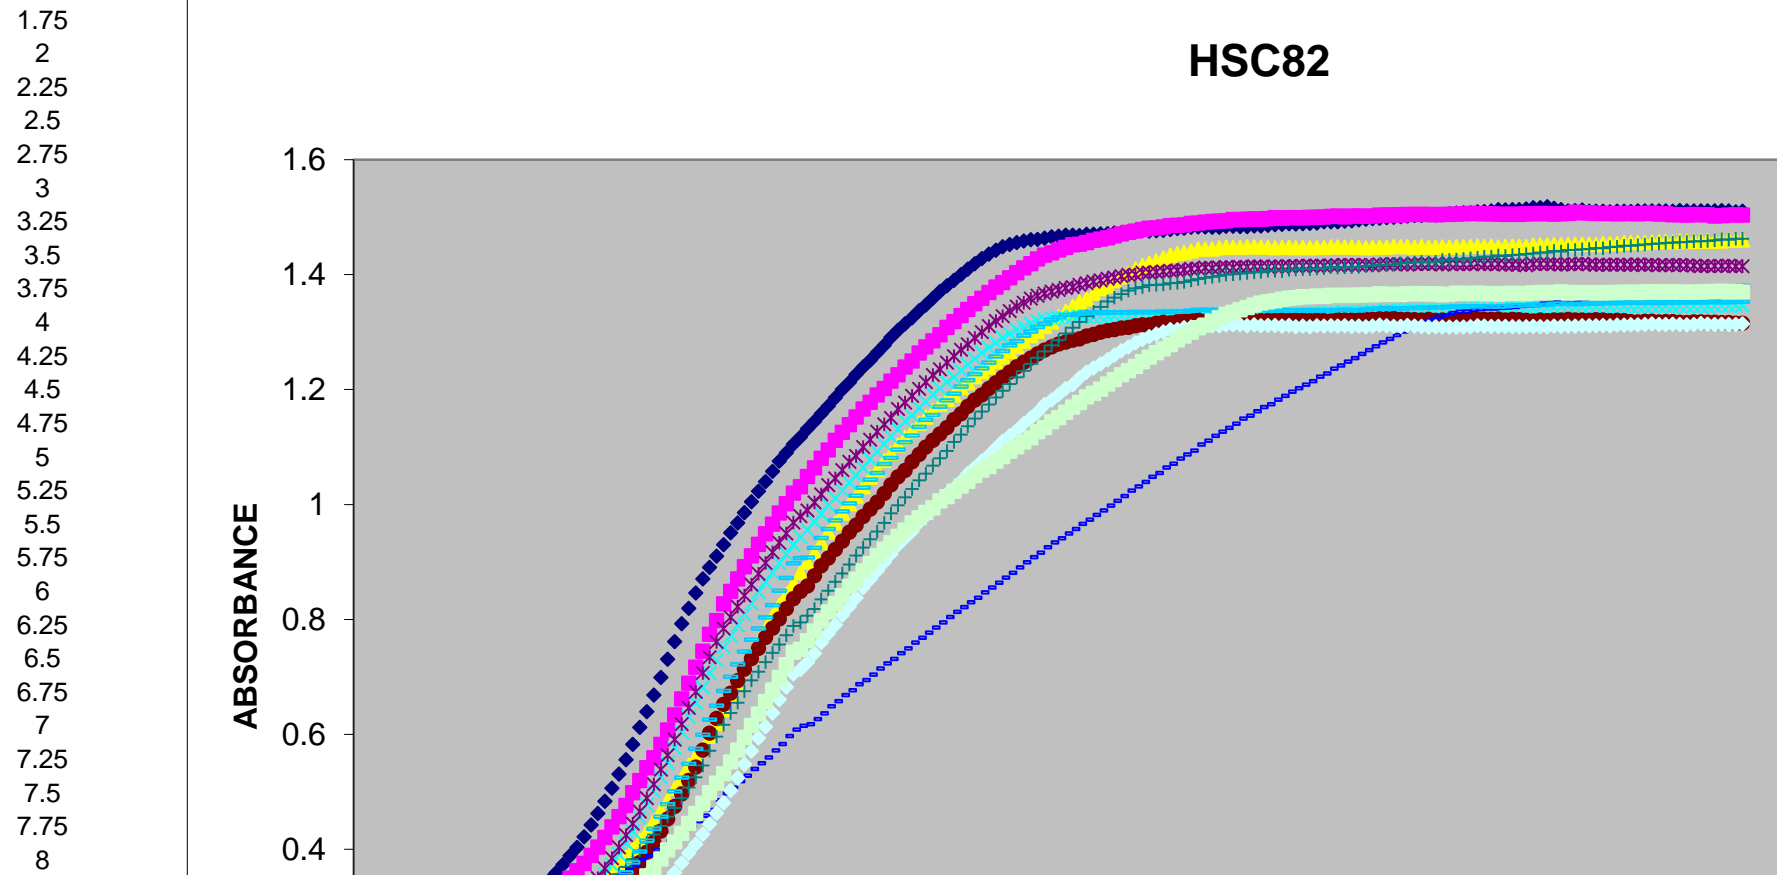

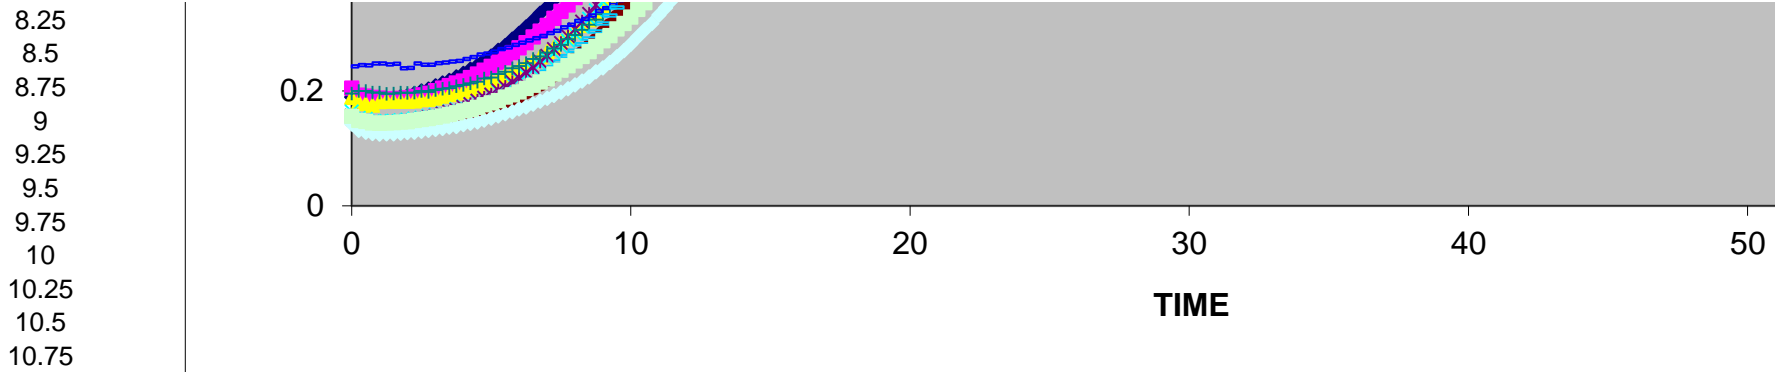

|       |        |        |        |        |        |        |        |        |
|-------|--------|--------|--------|--------|--------|--------|--------|--------|
| 11    | 0.6992 | 0.5825 | 0.4678 | 0.5256 | 0.5388 | 0.4317 | 0.4408 | 0.4059 |
| 11.25 | 0.7307 | 0.6075 | 0.4857 | 0.5506 | 0.564  | 0.4532 | 0.4569 | 0.415  |
| 11.5  | 0.7614 | 0.6339 | 0.5059 | 0.5768 | 0.5913 | 0.4746 | 0.4719 | 0.4239 |
| 11.75 | 0.7927 | 0.6618 | 0.5242 | 0.604  | 0.6179 | 0.4961 | 0.4894 | 0.4319 |
| 12    | 0.8194 | 0.6889 | 0.5464 | 0.6306 | 0.6463 | 0.5199 | 0.5077 | 0.4408 |
| 12.25 | 0.8459 | 0.7168 | 0.5622 | 0.6552 | 0.6738 | 0.5431 | 0.5256 | 0.449  |
| 12.5  | 0.8706 | 0.7448 | 0.5743 | 0.6817 | 0.7066 | 0.5724 | 0.5462 | 0.4584 |
| 12.75 | 0.8904 | 0.7744 | 0.5968 | 0.7067 | 0.7344 | 0.602  | 0.5716 | 0.4685 |
| 13    | 0.9099 | 0.7982 | 0.6186 | 0.7289 | 0.7607 | 0.6277 | 0.5959 | 0.4852 |
| 13.25 | 0.9301 | 0.8269 | 0.6426 | 0.7517 | 0.7844 | 0.6521 | 0.6167 | 0.4974 |
| 13.5  | 0.9508 | 0.849  | 0.6665 | 0.7717 | 0.804  | 0.6719 | 0.6371 | 0.5074 |
| 13.75 | 0.9679 | 0.8707 | 0.6913 | 0.79   | 0.8223 | 0.6933 | 0.6552 | 0.5185 |
| 14    | 0.986  | 0.8918 | 0.7152 | 0.8085 | 0.8417 | 0.7133 | 0.6753 | 0.5283 |
| 14.25 | 1.0047 | 0.9106 | 0.7372 | 0.8276 | 0.8607 | 0.7318 | 0.6938 | 0.54   |
| 14.5  | 1.0233 | 0.9308 | 0.7608 | 0.8479 | 0.8793 | 0.7496 | 0.7088 | 0.5497 |
| 14.75 | 1.0397 | 0.9491 | 0.7825 | 0.8649 | 0.8984 | 0.7685 | 0.7257 | 0.56   |
| 15    | 1.0577 | 0.966  | 0.8057 | 0.8811 | 0.917  | 0.7846 | 0.742  | 0.5719 |
| 15.25 | 1.0753 | 0.9853 | 0.8251 | 0.8979 | 0.9336 | 0.8007 | 0.7565 | 0.5834 |
| 15.5  | 1.0897 | 1.0015 | 0.8439 | 0.9137 | 0.9496 | 0.8188 | 0.7728 | 0.5969 |
| 15.75 | 1.1049 | 1.0198 | 0.8628 | 0.93   | 0.9688 | 0.8363 | 0.7885 | 0.6082 |
| 16    | 1.1171 | 1.031  | 0.8817 | 0.9434 | 0.9795 | 0.849  | 0.7947 | 0.6152 |
| 16.25 | 1.1316 | 1.0487 | 0.8996 | 0.9557 | 0.9897 | 0.8584 | 0.8065 | 0.6176 |
| 16.5  | 1.1443 | 1.0637 | 0.9165 | 0.9704 | 1.0034 | 0.876  | 0.8181 | 0.6264 |
| 16.75 | 1.1579 | 1.0806 | 0.9342 | 0.9835 | 1.0176 | 0.8932 | 0.835  | 0.6368 |
| 17    | 1.1715 | 1.0952 | 0.9517 | 0.9992 | 1.0335 | 0.9066 | 0.8502 | 0.6488 |
| 17.25 | 1.1858 | 1.1114 | 0.9682 | 1.0113 | 1.0455 | 0.9216 | 0.8653 | 0.6579 |
| 17.5  | 1.2004 | 1.1256 | 0.9855 | 1.0244 | 1.0597 | 0.9365 | 0.8801 | 0.6685 |
| 17.75 | 1.2123 | 1.1388 | 1.0016 | 1.0382 | 1.0745 | 0.9519 | 0.8957 | 0.6766 |
| 18    | 1.2261 | 1.1522 | 1.015  | 1.0503 | 1.0845 | 0.9643 | 0.9113 | 0.6871 |
| 18.25 | 1.239  | 1.1664 | 1.0307 | 1.0645 | 1.0999 | 0.979  | 0.9253 | 0.6948 |
| 18.5  | 1.251  | 1.1779 | 1.0478 | 1.0789 | 1.1127 | 0.992  | 0.9394 | 0.7041 |



|       |        |        |        |        |        |        |        |        |
|-------|--------|--------|--------|--------|--------|--------|--------|--------|
| 18.75 | 1.2641 | 1.1907 | 1.0607 | 1.0919 | 1.1265 | 1.0042 | 0.9529 | 0.7144 |
| 19    | 1.2773 | 1.2018 | 1.0765 | 1.1052 | 1.1396 | 1.0194 | 0.9682 | 0.7236 |
| 19.25 | 1.2907 | 1.2145 | 1.0891 | 1.1182 | 1.1508 | 1.034  | 0.9845 | 0.7311 |
| 19.5  | 1.3032 | 1.2259 | 1.1041 | 1.1311 | 1.1662 | 1.0483 | 0.9985 | 0.7415 |
| 19.75 | 1.3141 | 1.239  | 1.1166 | 1.1448 | 1.1771 | 1.0595 | 1.0125 | 0.7497 |
| 20    | 1.3251 | 1.2497 | 1.1283 | 1.1544 | 1.1891 | 1.0744 | 1.0271 | 0.7595 |
| 20.25 | 1.3374 | 1.2637 | 1.1419 | 1.1684 | 1.2012 | 1.0872 | 1.042  | 0.7681 |
| 20.5  | 1.3474 | 1.2743 | 1.1521 | 1.1787 | 1.2132 | 1.0998 | 1.0539 | 0.7771 |
| 20.75 | 1.3589 | 1.2848 | 1.1637 | 1.1917 | 1.225  | 1.1114 | 1.0676 | 0.7857 |
| 21    | 1.3704 | 1.2956 | 1.1744 | 1.2018 | 1.2351 | 1.1228 | 1.0803 | 0.7947 |
| 21.25 | 1.3806 | 1.3083 | 1.1829 | 1.2132 | 1.2472 | 1.1338 | 1.0935 | 0.8042 |
| 21.5  | 1.39   | 1.3184 | 1.1906 | 1.2216 | 1.258  | 1.1476 | 1.1087 | 0.8131 |
| 21.75 | 1.3999 | 1.3289 | 1.2037 | 1.2332 | 1.2691 | 1.158  | 1.1217 | 0.8215 |
| 22    | 1.4093 | 1.3395 | 1.2116 | 1.2434 | 1.2787 | 1.1708 | 1.136  | 0.8298 |
| 22.25 | 1.4189 | 1.3493 | 1.2223 | 1.2537 | 1.2899 | 1.1816 | 1.1493 | 0.8377 |
| 22.5  | 1.4278 | 1.3589 | 1.2316 | 1.2641 | 1.2997 | 1.1907 | 1.1616 | 0.8471 |
| 22.75 | 1.4356 | 1.369  | 1.2391 | 1.2726 | 1.3102 | 1.2019 | 1.174  | 0.8553 |
| 23    | 1.4425 | 1.3781 | 1.2485 | 1.2816 | 1.3194 | 1.2118 | 1.186  | 0.8639 |
| 23.25 | 1.4488 | 1.3861 | 1.257  | 1.2906 | 1.3275 | 1.2216 | 1.1978 | 0.8726 |
| 23.5  | 1.4527 | 1.3947 | 1.2667 | 1.2974 | 1.3367 | 1.2303 | 1.2094 | 0.8814 |
| 23.75 | 1.4559 | 1.4037 | 1.2752 | 1.3039 | 1.3443 | 1.2395 | 1.2211 | 0.8905 |
| 24    | 1.4583 | 1.4119 | 1.2845 | 1.3087 | 1.351  | 1.2477 | 1.2324 | 0.8996 |
| 24.25 | 1.4609 | 1.4188 | 1.2937 | 1.3144 | 1.3581 | 1.2545 | 1.2446 | 0.9084 |
| 24.5  | 1.4615 | 1.4276 | 1.3014 | 1.3191 | 1.3634 | 1.2618 | 1.2554 | 0.9162 |
| 24.75 | 1.4635 | 1.4341 | 1.3101 | 1.3216 | 1.3673 | 1.2687 | 1.2667 | 0.9257 |
| 25    | 1.466  | 1.4379 | 1.3177 | 1.3244 | 1.3706 | 1.2744 | 1.2773 | 0.9342 |
| 25.25 | 1.4669 | 1.4431 | 1.3269 | 1.3247 | 1.3735 | 1.2795 | 1.2861 | 0.9412 |
| 25.5  | 1.4687 | 1.4476 | 1.3358 | 1.3244 | 1.3767 | 1.2826 | 1.2978 | 0.9495 |
| 25.75 | 1.4687 | 1.4518 | 1.345  | 1.3272 | 1.3786 | 1.2858 | 1.3077 | 0.9574 |
| 26    | 1.4682 | 1.453  | 1.3526 | 1.3269 | 1.3821 | 1.2879 | 1.3177 | 0.9665 |
| 26.25 | 1.4704 | 1.4557 | 1.3577 | 1.3268 | 1.3853 | 1.2933 | 1.3275 | 0.9736 |
| 26.5  | 1.4702 | 1.4595 | 1.368  | 1.326  | 1.388  | 1.2961 | 1.3356 | 0.9819 |
| 26.75 | 1.4706 | 1.4619 | 1.3756 | 1.3272 | 1.3901 | 1.2999 | 1.3436 | 0.9899 |
| 27    | 1.4716 | 1.4639 | 1.3808 | 1.3272 | 1.3929 | 1.3028 | 1.3532 | 0.9982 |
| 27.25 | 1.4725 | 1.4677 | 1.3894 | 1.328  | 1.3952 | 1.3044 | 1.36   | 1.0064 |
| 27.5  | 1.473  | 1.4709 | 1.396  | 1.3279 | 1.3972 | 1.3071 | 1.3661 | 1.0147 |
| 27.75 | 1.4747 | 1.4735 | 1.4025 | 1.3276 | 1.3997 | 1.3082 | 1.372  | 1.0241 |
| 28    | 1.4747 | 1.4758 | 1.4095 | 1.3279 | 1.4002 | 1.3112 | 1.3761 | 1.0312 |
| 28.25 | 1.4772 | 1.4784 | 1.4156 | 1.3277 | 1.4033 | 1.3124 | 1.3784 | 1.0392 |
| 28.5  | 1.4758 | 1.4806 | 1.4201 | 1.328  | 1.4033 | 1.3129 | 1.3815 | 1.0482 |
| 28.75 | 1.4763 | 1.4813 | 1.4239 | 1.3284 | 1.4044 | 1.3153 | 1.3825 | 1.0551 |
| 29    | 1.4771 | 1.4829 | 1.4289 | 1.3285 | 1.4056 | 1.3171 | 1.3827 | 1.0641 |

|       |        |        |        |        |        |        |        |        |
|-------|--------|--------|--------|--------|--------|--------|--------|--------|
| 29.25 | 1.4786 | 1.485  | 1.4341 | 1.3287 | 1.4067 | 1.3162 | 1.3849 | 1.0712 |
| 29.5  | 1.4803 | 1.4861 | 1.4367 | 1.3295 | 1.4073 | 1.3182 | 1.3857 | 1.0801 |
| 29.75 | 1.4807 | 1.4866 | 1.4387 | 1.3288 | 1.4083 | 1.3196 | 1.3873 | 1.0871 |
| 30    | 1.4823 | 1.4892 | 1.4412 | 1.3299 | 1.4102 | 1.3201 | 1.39   | 1.094  |
| 30.25 | 1.4831 | 1.49   | 1.4444 | 1.3295 | 1.4108 | 1.3208 | 1.3925 | 1.1046 |
| 30.5  | 1.4829 | 1.4913 | 1.4444 | 1.3311 | 1.4125 | 1.3187 | 1.3945 | 1.1112 |
| 30.75 | 1.4823 | 1.4923 | 1.4446 | 1.3312 | 1.4111 | 1.3205 | 1.3963 | 1.1193 |
| 31    | 1.4825 | 1.4929 | 1.4466 | 1.3317 | 1.4122 | 1.3207 | 1.3979 | 1.1266 |
| 31.25 | 1.4843 | 1.4939 | 1.448  | 1.3324 | 1.4134 | 1.3204 | 1.3999 | 1.1335 |
| 31.5  | 1.4842 | 1.496  | 1.4475 | 1.3313 | 1.4124 | 1.321  | 1.4008 | 1.1407 |
| 31.75 | 1.4837 | 1.4956 | 1.4475 | 1.3321 | 1.4135 | 1.3199 | 1.4015 | 1.1497 |
| 32    | 1.4837 | 1.4964 | 1.4488 | 1.3318 | 1.4134 | 1.3208 | 1.4031 | 1.1546 |
| 32.25 | 1.4847 | 1.4969 | 1.4483 | 1.3323 | 1.4144 | 1.3193 | 1.4038 | 1.1624 |
| 32.5  | 1.4848 | 1.4964 | 1.448  | 1.3314 | 1.414  | 1.3197 | 1.4048 | 1.1696 |
| 32.75 | 1.4858 | 1.4974 | 1.448  | 1.3312 | 1.4136 | 1.3205 | 1.4065 | 1.1747 |
| 33    | 1.4867 | 1.4992 | 1.4467 | 1.3317 | 1.4148 | 1.3206 | 1.4067 | 1.1822 |
| 33.25 | 1.4876 | 1.498  | 1.4476 | 1.3309 | 1.4138 | 1.3211 | 1.4062 | 1.1889 |
| 33.5  | 1.4885 | 1.4993 | 1.4481 | 1.3308 | 1.4145 | 1.3205 | 1.4083 | 1.1962 |
| 33.75 | 1.4883 | 1.4994 | 1.4469 | 1.3317 | 1.415  | 1.321  | 1.4091 | 1.2024 |
| 34    | 1.4888 | 1.4988 | 1.4474 | 1.3319 | 1.4152 | 1.3209 | 1.4096 | 1.2087 |
| 34.25 | 1.4892 | 1.4995 | 1.4471 | 1.3322 | 1.4154 | 1.32   | 1.4096 | 1.2149 |
| 34.5  | 1.4899 | 1.4996 | 1.4474 | 1.3326 | 1.4157 | 1.3211 | 1.4105 | 1.2227 |
| 34.75 | 1.4919 | 1.5003 | 1.4472 | 1.3332 | 1.4152 | 1.3201 | 1.4113 | 1.228  |
| 35    | 1.492  | 1.5014 | 1.4486 | 1.3343 | 1.4165 | 1.3195 | 1.4134 | 1.2361 |
| 35.25 | 1.4922 | 1.502  | 1.4486 | 1.3334 | 1.4162 | 1.3218 | 1.4126 | 1.2422 |
| 35.5  | 1.4933 | 1.5004 | 1.4477 | 1.335  | 1.417  | 1.3208 | 1.4131 | 1.2489 |
| 35.75 | 1.4939 | 1.5019 | 1.4479 | 1.335  | 1.4167 | 1.3209 | 1.4131 | 1.2545 |
| 36    | 1.4951 | 1.5018 | 1.4476 | 1.3348 | 1.4169 | 1.3217 | 1.4133 | 1.2619 |
| 36.25 | 1.4965 | 1.5015 | 1.4469 | 1.3356 | 1.4166 | 1.3224 | 1.4152 | 1.2684 |
| 36.5  | 1.4976 | 1.5021 | 1.4473 | 1.3359 | 1.4162 | 1.3221 | 1.4157 | 1.2756 |
| 36.75 | 1.4983 | 1.5037 | 1.4481 | 1.3357 | 1.418  | 1.3235 | 1.4172 | 1.2818 |
| 37    | 1.4992 | 1.5034 | 1.4477 | 1.3372 | 1.418  | 1.3231 | 1.4166 | 1.2883 |
| 37.25 | 1.4997 | 1.504  | 1.449  | 1.337  | 1.4186 | 1.3236 | 1.418  | 1.2946 |
| 37.5  | 1.5011 | 1.5037 | 1.4489 | 1.3382 | 1.418  | 1.3224 | 1.4195 | 1.3011 |
| 37.75 | 1.502  | 1.505  | 1.4486 | 1.3388 | 1.4173 | 1.3219 | 1.4202 | 1.3063 |
| 38    | 1.5029 | 1.5047 | 1.4475 | 1.3383 | 1.4185 | 1.3217 | 1.4211 | 1.3128 |
| 38.25 | 1.5029 | 1.5046 | 1.449  | 1.3382 | 1.4185 | 1.3209 | 1.4223 | 1.317  |
| 38.5  | 1.504  | 1.505  | 1.4481 | 1.3389 | 1.4182 | 1.322  | 1.4212 | 1.3228 |
| 38.75 | 1.5035 | 1.5042 | 1.448  | 1.3384 | 1.4188 | 1.3206 | 1.4224 | 1.3268 |
| 39    | 1.5042 | 1.505  | 1.4488 | 1.3383 | 1.4172 | 1.3209 | 1.4256 | 1.3296 |
| 39.25 | 1.5058 | 1.5049 | 1.4482 | 1.3386 | 1.419  | 1.3212 | 1.4256 | 1.3331 |
| 39.5  | 1.507  | 1.5052 | 1.4485 | 1.3391 | 1.4186 | 1.3215 | 1.426  | 1.3357 |

|       |        |        |        |        |        |        |        |        |
|-------|--------|--------|--------|--------|--------|--------|--------|--------|
| 39.75 | 1.5073 | 1.506  | 1.4484 | 1.3393 | 1.4179 | 1.3224 | 1.4272 | 1.3361 |
| 40    | 1.5077 | 1.5062 | 1.4489 | 1.3406 | 1.4187 | 1.3226 | 1.4286 | 1.3387 |
| 40.25 | 1.5093 | 1.5063 | 1.4496 | 1.3405 | 1.4195 | 1.3225 | 1.4298 | 1.3401 |
| 40.5  | 1.5096 | 1.506  | 1.4489 | 1.3401 | 1.418  | 1.3222 | 1.4311 | 1.3411 |
| 40.75 | 1.5108 | 1.5059 | 1.4494 | 1.339  | 1.4183 | 1.3224 | 1.4314 | 1.341  |
| 41    | 1.5129 | 1.5053 | 1.4485 | 1.3404 | 1.4184 | 1.3226 | 1.4333 | 1.3422 |
| 41.25 | 1.5127 | 1.5048 | 1.4491 | 1.3406 | 1.4176 | 1.3209 | 1.4324 | 1.3427 |
| 41.5  | 1.513  | 1.5052 | 1.4495 | 1.3421 | 1.4176 | 1.3219 | 1.4338 | 1.3438 |
| 41.75 | 1.513  | 1.5045 | 1.4496 | 1.3413 | 1.4171 | 1.3213 | 1.4345 | 1.3457 |
| 42    | 1.5143 | 1.506  | 1.4492 | 1.3416 | 1.4165 | 1.3206 | 1.4356 | 1.3468 |
| 42.25 | 1.5164 | 1.506  | 1.4512 | 1.3415 | 1.4185 | 1.3196 | 1.4369 | 1.3474 |
| 42.5  | 1.5166 | 1.5062 | 1.4516 | 1.3419 | 1.4184 | 1.3211 | 1.4386 | 1.3493 |
| 42.75 | 1.518  | 1.506  | 1.4518 | 1.3429 | 1.4185 | 1.32   | 1.4385 | 1.3506 |
| 43    | 1.5154 | 1.5053 | 1.4522 | 1.3419 | 1.4185 | 1.321  | 1.4411 | 1.3518 |
| 43.25 | 1.5129 | 1.5059 | 1.4522 | 1.3438 | 1.4172 | 1.3212 | 1.44   | 1.3539 |
| 43.5  | 1.5111 | 1.5064 | 1.4527 | 1.3442 | 1.4179 | 1.3221 | 1.4427 | 1.354  |
| 43.75 | 1.5114 | 1.5084 | 1.453  | 1.3437 | 1.4187 | 1.3212 | 1.4432 | 1.3565 |
| 44    | 1.5125 | 1.5078 | 1.4529 | 1.3437 | 1.4191 | 1.321  | 1.444  | 1.3582 |
| 44.25 | 1.5102 | 1.5073 | 1.4529 | 1.3436 | 1.418  | 1.3202 | 1.4445 | 1.3598 |
| 44.5  | 1.5105 | 1.5065 | 1.4523 | 1.3435 | 1.4169 | 1.3218 | 1.4463 | 1.3626 |
| 44.75 | 1.5104 | 1.5065 | 1.454  | 1.3441 | 1.4171 | 1.3212 | 1.4459 | 1.3635 |
| 45    | 1.5092 | 1.5064 | 1.4543 | 1.3442 | 1.4171 | 1.3199 | 1.4481 | 1.3652 |
| 45.25 | 1.5105 | 1.5057 | 1.4541 | 1.3445 | 1.4172 | 1.3202 | 1.4485 | 1.3662 |
| 45.5  | 1.5103 | 1.5065 | 1.4557 | 1.3443 | 1.4171 | 1.3201 | 1.4503 | 1.3677 |
| 45.75 | 1.51   | 1.5067 | 1.4559 | 1.3443 | 1.4168 | 1.3184 | 1.4501 | 1.3682 |
| 46    | 1.5108 | 1.5061 | 1.4561 | 1.345  | 1.4179 | 1.3179 | 1.4511 | 1.37   |
| 46.25 | 1.5109 | 1.5064 | 1.456  | 1.3444 | 1.4166 | 1.3188 | 1.4525 | 1.3702 |
| 46.5  | 1.511  | 1.5069 | 1.4571 | 1.3453 | 1.4174 | 1.3186 | 1.4538 | 1.3712 |
| 46.75 | 1.511  | 1.5052 | 1.4577 | 1.3447 | 1.4162 | 1.3175 | 1.454  | 1.3717 |
| 47    | 1.5111 | 1.5059 | 1.4574 | 1.3456 | 1.416  | 1.3181 | 1.4552 | 1.3722 |
| 47.25 | 1.5102 | 1.5042 | 1.4571 | 1.3439 | 1.4168 | 1.3181 | 1.4555 | 1.3732 |
| 47.5  | 1.5112 | 1.5044 | 1.4583 | 1.3447 | 1.4166 | 1.317  | 1.4564 | 1.3745 |
| 47.75 | 1.5109 | 1.5036 | 1.4575 | 1.3449 | 1.4161 | 1.3163 | 1.4566 | 1.3751 |
| 48    | 1.511  | 1.5046 | 1.4582 | 1.3451 | 1.4159 | 1.3178 | 1.458  | 1.375  |
| 48.25 | 1.511  | 1.5042 | 1.4587 | 1.3445 | 1.4145 | 1.3175 | 1.458  | 1.3767 |
| 48.5  | 1.5111 | 1.504  | 1.4592 | 1.3442 | 1.4151 | 1.3173 | 1.4588 | 1.3769 |
| 48.75 | 1.5107 | 1.5019 | 1.4578 | 1.3453 | 1.415  | 1.3171 | 1.4599 | 1.3779 |
| 49    | 1.5112 | 1.5026 | 1.4586 | 1.3458 | 1.4152 | 1.3167 | 1.4611 | 1.3791 |
| 49.25 | 1.5109 | 1.5034 | 1.4604 | 1.3457 | 1.4155 | 1.3164 | 1.4607 | 1.379  |
| 49.5  | 1.5094 | 1.504  | 1.4603 | 1.346  | 1.4147 | 1.3156 | 1.4623 | 1.38   |
| 49.75 | 1.5105 | 1.5038 | 1.4602 | 1.3461 | 1.4143 | 1.3156 | 1.4627 | 1.38   |

| A6           | A7            | A8            |
|--------------|---------------|---------------|
| <b>RAD 3</b> | <b>RAD 10</b> | <b>RAD 30</b> |
| 0.1526       | 0.1428        | 0.1564        |
| 0.1403       | 0.1315        | 0.1489        |
| 0.139        | 0.1282        | 0.147         |
| 0.1375       | 0.1259        | 0.1446        |
| 0.137        | 0.1252        | 0.1437        |
| 0.1376       | 0.1258        | 0.1446        |
| 0.1386       | 0.1257        | 0.145         |

- 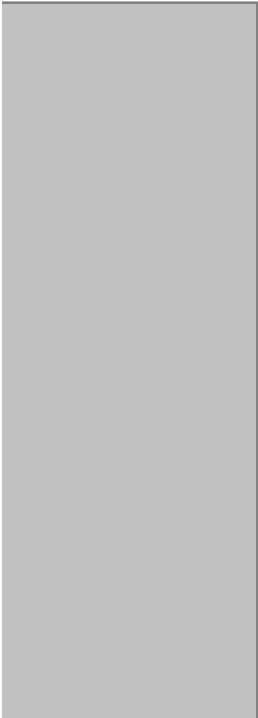
- ◆ WT
  - WT(GA 3)
  - ▲ WT(RAD3)
  - × NO DRUG
  - × GA 3uM
  - GA 7uM
  - + NOVO 100
  - NOVO 250
  - RAD 3
  - ◆ RAD 10
  - RAD 30

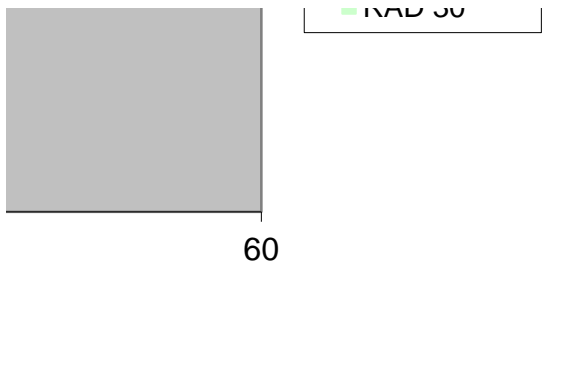

|        |        |        |
|--------|--------|--------|
| 0.4571 | 0.3319 | 0.3835 |
| 0.4784 | 0.3451 | 0.3989 |
| 0.5007 | 0.3595 | 0.4129 |
| 0.5246 | 0.3759 | 0.4279 |
| 0.5485 | 0.3936 | 0.4452 |
| 0.575  | 0.409  | 0.4625 |
| 0.5996 | 0.4262 | 0.4802 |
| 0.6257 | 0.4441 | 0.4985 |
| 0.6501 | 0.463  | 0.5151 |
| 0.6756 | 0.4808 | 0.5315 |
| 0.7001 | 0.5024 | 0.552  |
| 0.722  | 0.5242 | 0.5727 |
| 0.7439 | 0.5481 | 0.5949 |
| 0.7648 | 0.5711 | 0.6156 |
| 0.7843 | 0.5936 | 0.6358 |
| 0.8036 | 0.6131 | 0.6572 |
| 0.8249 | 0.637  | 0.6776 |
| 0.8501 | 0.6609 | 0.6988 |
| 0.8723 | 0.6823 | 0.7214 |
| 0.8976 | 0.7053 | 0.743  |
| 0.9065 | 0.713  | 0.7479 |
| 0.9076 | 0.7254 | 0.7631 |
| 0.9243 | 0.741  | 0.7797 |
| 0.9417 | 0.7595 | 0.7975 |
| 0.9574 | 0.7752 | 0.8131 |
| 0.9723 | 0.7906 | 0.8278 |
| 0.9878 | 0.8078 | 0.8417 |
| 1.002  | 0.8228 | 0.858  |
| 1.0151 | 0.8379 | 0.8702 |
| 1.0295 | 0.8556 | 0.8842 |
| 1.043  | 0.87   | 0.897  |

|        |        |        |
|--------|--------|--------|
| 1.0551 | 0.8843 | 0.9105 |
| 1.0705 | 0.8993 | 0.9223 |
| 1.081  | 0.9142 | 0.9336 |
| 1.0953 | 0.9295 | 0.9446 |
| 1.1083 | 0.9418 | 0.9556 |
| 1.1198 | 0.9534 | 0.9679 |
| 1.1348 | 0.9691 | 0.9768 |
| 1.1473 | 0.9804 | 0.9863 |
| 1.1557 | 0.9929 | 0.9944 |
| 1.1701 | 1.005  | 1.0064 |
| 1.1812 | 1.018  | 1.0136 |
| 1.1928 | 1.0282 | 1.0231 |
| 1.2051 | 1.0401 | 1.0318 |
| 1.2163 | 1.0538 | 1.0405 |
| 1.2268 | 1.0641 | 1.0502 |
| 1.2369 | 1.0753 | 1.0596 |
| 1.2471 | 1.0853 | 1.0662 |
| 1.2576 | 1.0981 | 1.0753 |
| 1.2669 | 1.1102 | 1.0831 |
| 1.2773 | 1.1194 | 1.0927 |
| 1.2842 | 1.1289 | 1.1003 |
| 1.294  | 1.1404 | 1.1089 |
| 1.3012 | 1.1506 | 1.1162 |
| 1.3085 | 1.1607 | 1.1269 |
| 1.3144 | 1.1738 | 1.1341 |
| 1.3215 | 1.1819 | 1.1438 |
| 1.326  | 1.1915 | 1.1514 |
| 1.3297 | 1.2019 | 1.1609 |
| 1.3301 | 1.2087 | 1.1693 |
| 1.3322 | 1.2201 | 1.1773 |
| 1.3341 | 1.23   | 1.1872 |
| 1.3335 | 1.2377 | 1.1936 |
| 1.335  | 1.2445 | 1.2009 |
| 1.3336 | 1.2522 | 1.2094 |
| 1.3342 | 1.26   | 1.2174 |
| 1.3343 | 1.2674 | 1.226  |
| 1.334  | 1.2743 | 1.2328 |
| 1.3347 | 1.2814 | 1.2404 |
| 1.3349 | 1.287  | 1.2486 |
| 1.3343 | 1.2923 | 1.2566 |
| 1.3349 | 1.2967 | 1.2642 |
| 1.3353 | 1.3005 | 1.2708 |

|        |        |        |
|--------|--------|--------|
| 1.335  | 1.3045 | 1.2783 |
| 1.3363 | 1.3045 | 1.2864 |
| 1.3355 | 1.3074 | 1.2932 |
| 1.3372 | 1.3086 | 1.3    |
| 1.3386 | 1.3108 | 1.3074 |
| 1.338  | 1.3111 | 1.3123 |
| 1.3388 | 1.3111 | 1.3191 |
| 1.338  | 1.3108 | 1.3249 |
| 1.3392 | 1.3124 | 1.3312 |
| 1.3389 | 1.3126 | 1.3343 |
| 1.3383 | 1.3129 | 1.3389 |
| 1.3384 | 1.311  | 1.343  |
| 1.3384 | 1.3124 | 1.347  |
| 1.3385 | 1.311  | 1.3504 |
| 1.3376 | 1.3115 | 1.3526 |
| 1.3379 | 1.3113 | 1.3543 |
| 1.3384 | 1.3107 | 1.357  |
| 1.3376 | 1.3114 | 1.359  |
| 1.3379 | 1.3092 | 1.3602 |
| 1.3382 | 1.3107 | 1.3615 |
| 1.3371 | 1.3092 | 1.3618 |
| 1.3381 | 1.3112 | 1.3628 |
| 1.3371 | 1.3104 | 1.3621 |
| 1.3379 | 1.3108 | 1.364  |
| 1.3383 | 1.3103 | 1.3641 |
| 1.3387 | 1.3112 | 1.3641 |
| 1.3383 | 1.3101 | 1.3639 |
| 1.3379 | 1.3105 | 1.3647 |
| 1.3393 | 1.3092 | 1.3651 |
| 1.3403 | 1.3106 | 1.3649 |
| 1.3403 | 1.3119 | 1.3666 |
| 1.3419 | 1.3112 | 1.3655 |
| 1.3406 | 1.3096 | 1.3658 |
| 1.341  | 1.3097 | 1.3655 |
| 1.3415 | 1.3113 | 1.3666 |
| 1.3421 | 1.3106 | 1.367  |
| 1.3423 | 1.3101 | 1.3664 |
| 1.3421 | 1.3089 | 1.3668 |
| 1.3427 | 1.3094 | 1.3664 |
| 1.3431 | 1.3085 | 1.3651 |
| 1.3437 | 1.3085 | 1.3659 |
| 1.3445 | 1.3086 | 1.3676 |

|        |        |        |
|--------|--------|--------|
| 1.3439 | 1.3087 | 1.3674 |
| 1.345  | 1.3094 | 1.3672 |
| 1.345  | 1.3108 | 1.3677 |
| 1.3448 | 1.3103 | 1.3669 |
| 1.3449 | 1.3099 | 1.367  |
| 1.3445 | 1.3099 | 1.3663 |
| 1.3452 | 1.3101 | 1.3671 |
| 1.346  | 1.3092 | 1.3675 |
| 1.3468 | 1.3094 | 1.3675 |
| 1.3464 | 1.3093 | 1.3673 |
| 1.3475 | 1.3098 | 1.3682 |
| 1.347  | 1.3091 | 1.3687 |
| 1.3474 | 1.3095 | 1.3688 |
| 1.3492 | 1.3105 | 1.3691 |
| 1.3494 | 1.3099 | 1.3698 |
| 1.349  | 1.3107 | 1.3678 |
| 1.3491 | 1.3107 | 1.3688 |
| 1.3489 | 1.3112 | 1.3682 |
| 1.3508 | 1.3111 | 1.3689 |
| 1.3493 | 1.3108 | 1.3685 |
| 1.3503 | 1.3114 | 1.3685 |
| 1.3506 | 1.3112 | 1.3689 |
| 1.3505 | 1.3123 | 1.3689 |
| 1.3512 | 1.3122 | 1.3696 |
| 1.3509 | 1.3124 | 1.3693 |
| 1.3517 | 1.3129 | 1.3691 |
| 1.351  | 1.3134 | 1.3701 |
| 1.3514 | 1.3141 | 1.3702 |
| 1.3504 | 1.3134 | 1.37   |
| 1.3519 | 1.3131 | 1.3697 |
| 1.3518 | 1.3137 | 1.3699 |
| 1.3519 | 1.3133 | 1.3694 |
| 1.3519 | 1.3127 | 1.3696 |
| 1.3527 | 1.3132 | 1.3696 |
| 1.3519 | 1.3147 | 1.37   |
| 1.3523 | 1.3137 | 1.3704 |
| 1.3532 | 1.3133 | 1.3703 |
| 1.3517 | 1.3135 | 1.3713 |
| 1.3523 | 1.3134 | 1.3702 |
| 1.3527 | 1.3131 | 1.3703 |
| 1.353  | 1.3142 | 1.37   |



|      |        |         | N9       |         | N10    |        | N11      |          | N12 |  | N13 |  |
|------|--------|---------|----------|---------|--------|--------|----------|----------|-----|--|-----|--|
| TIME | WT     | WT(GA3) | WT(RAD3) | NO DRUG | GA 3uM | GA 7uM | NOVO 100 | NOVO 250 |     |  |     |  |
| 0    | 0.1894 | 0.2051  | 0.1892   | 0.1747  | 0.1761 | 0.1706 | 0.2148   | 0.3458   |     |  |     |  |
| 0.25 | 0.1844 | 0.1929  | 0.1812   | 0.1651  | 0.1673 | 0.1603 | 0.2192   | 0.3343   |     |  |     |  |
| 0.5  | 0.1833 | 0.1912  | 0.1787   | 0.1639  | 0.1642 | 0.159  | 0.2227   | 0.3292   |     |  |     |  |
| 0.75 | 0.1838 | 0.189   | 0.1758   | 0.1601  | 0.162  | 0.1571 | 0.2238   | 0.3215   |     |  |     |  |
| 1    | 0.1843 | 0.1877  | 0.1818   | 0.162   | 0.1621 | 0.1587 | 0.2254   | 0.316    |     |  |     |  |
| 1.25 | 0.1867 | 0.1862  | 0.1836   | 0.1623  | 0.1639 | 0.1588 | 0.225    | 0.3074   |     |  |     |  |

HSP31

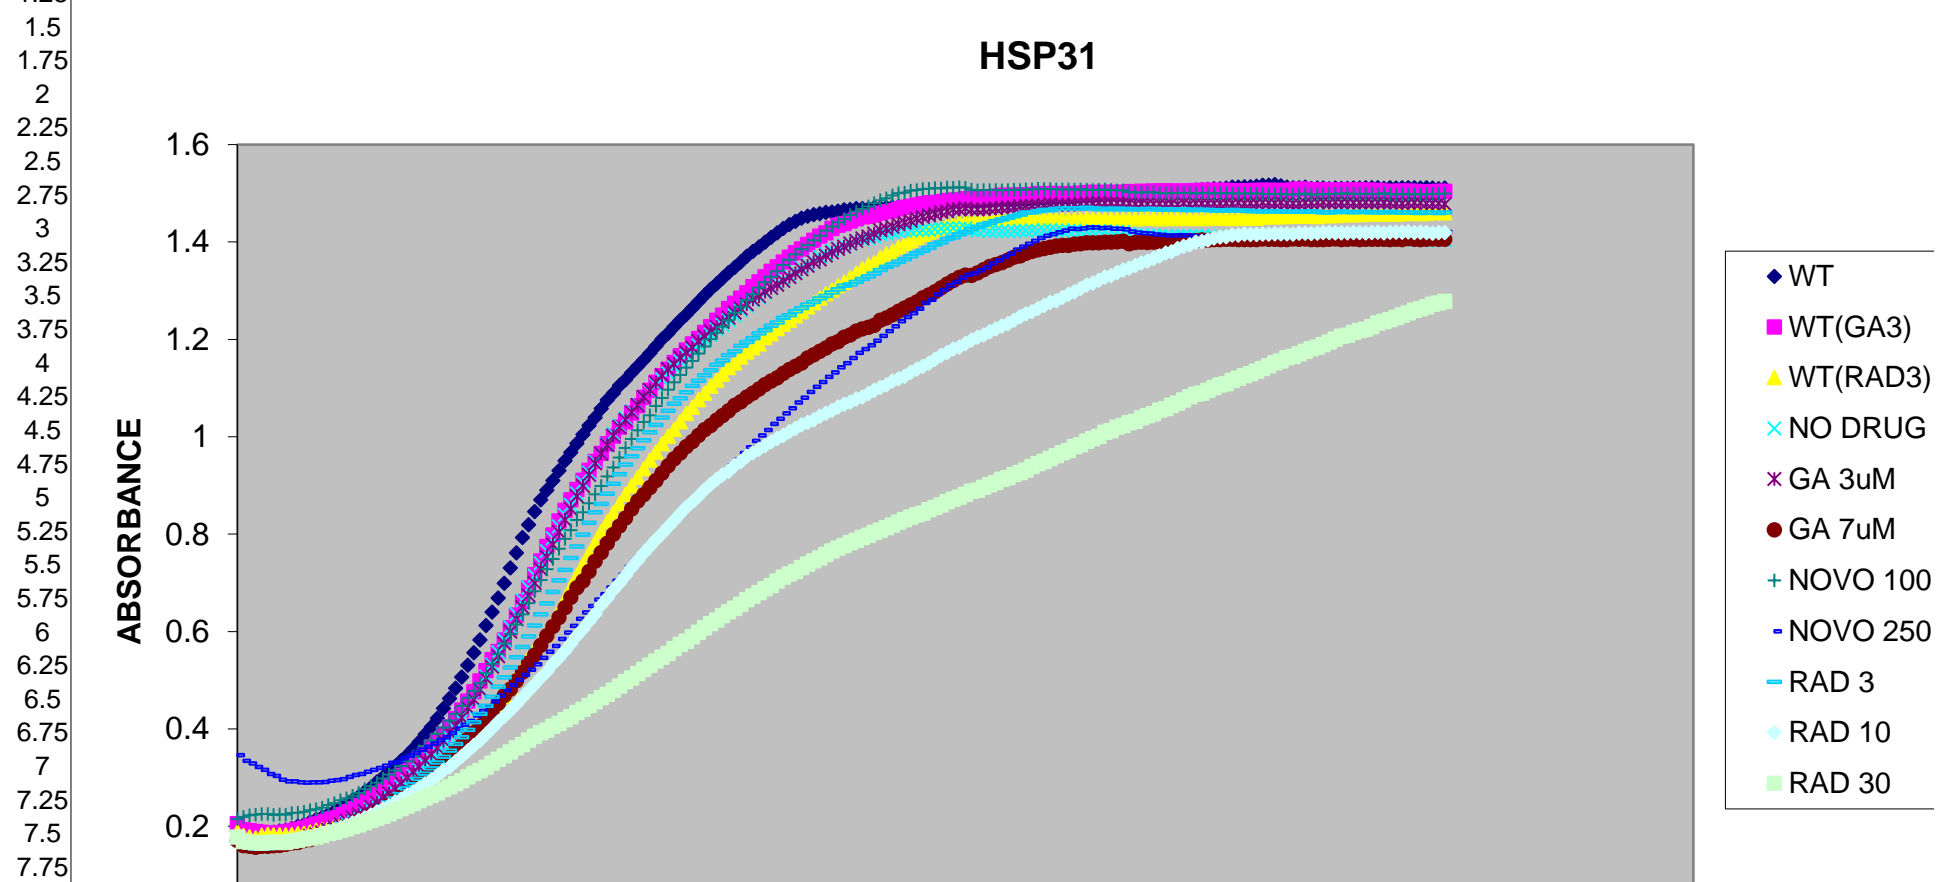

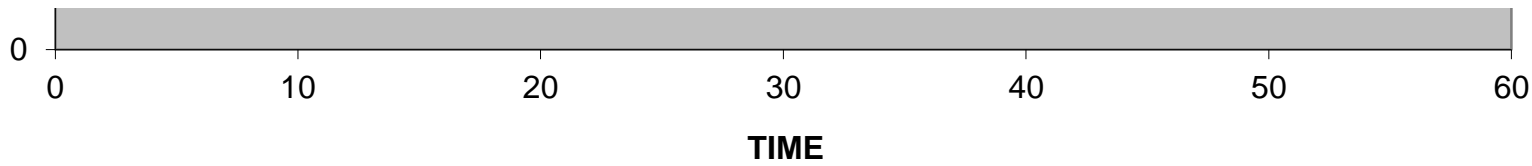

|       | 0      | 10     | 20     | 30     | 40     | 50     | 60     |        |
|-------|--------|--------|--------|--------|--------|--------|--------|--------|
| 8     |        |        |        |        |        |        |        |        |
| 8.25  |        |        |        |        |        |        |        |        |
| 8.5   |        |        |        |        |        |        |        |        |
| 8.75  |        |        |        |        |        |        |        |        |
| 9     |        |        |        |        |        |        |        |        |
| 9.25  |        |        |        |        |        |        |        |        |
| 9.5   | 0.5309 | 0.457  | 0.3738 | 0.4405 | 0.4435 | 0.3792 | 0.4637 | 0.4164 |
| 9.75  | 0.5562 | 0.4763 | 0.3865 | 0.4585 | 0.4606 | 0.3921 | 0.4784 | 0.4276 |
| 10    | 0.5829 | 0.4986 | 0.4011 | 0.4824 | 0.4809 | 0.4051 | 0.4945 | 0.4365 |
| 10.25 | 0.6122 | 0.5197 | 0.416  | 0.5076 | 0.5035 | 0.4203 | 0.5146 | 0.4463 |
| 10.5  | 0.6397 | 0.5418 | 0.4316 | 0.5318 | 0.5276 | 0.4351 | 0.5335 | 0.4566 |
| 10.75 | 0.6685 | 0.5593 | 0.4497 | 0.5577 | 0.5493 | 0.4516 | 0.5538 | 0.4682 |
| 11    | 0.6992 | 0.5825 | 0.4678 | 0.5828 | 0.5753 | 0.468  | 0.5756 | 0.4795 |
| 11.25 | 0.7307 | 0.6075 | 0.4857 | 0.6089 | 0.5995 | 0.4817 | 0.595  | 0.4899 |
| 11.5  | 0.7614 | 0.6339 | 0.5059 | 0.6359 | 0.6256 | 0.4985 | 0.614  | 0.5003 |
| 11.75 | 0.7927 | 0.6618 | 0.5242 | 0.6644 | 0.6499 | 0.5164 | 0.6351 | 0.5113 |
| 12    | 0.8194 | 0.6889 | 0.5464 | 0.6896 | 0.6737 | 0.5355 | 0.6581 | 0.5216 |
| 12.25 | 0.8459 | 0.7168 | 0.5622 | 0.715  | 0.6999 | 0.552  | 0.6823 | 0.533  |
| 12.5  | 0.8706 | 0.7448 | 0.5743 | 0.7407 | 0.7282 | 0.5718 | 0.7055 | 0.5459 |
| 12.75 | 0.8904 | 0.7744 | 0.5968 | 0.7656 | 0.7527 | 0.5912 | 0.7279 | 0.5582 |
| 13    | 0.9099 | 0.7982 | 0.6186 | 0.7918 | 0.7786 | 0.6103 | 0.749  | 0.5703 |
| 13.25 | 0.9301 | 0.8269 | 0.6426 | 0.8158 | 0.8039 | 0.6289 | 0.7702 | 0.5844 |
| 13.5  | 0.9508 | 0.849  | 0.6665 | 0.8395 | 0.829  | 0.6491 | 0.7904 | 0.5976 |
| 13.75 | 0.9679 | 0.8707 | 0.6913 | 0.8601 | 0.8517 | 0.6704 | 0.8084 | 0.6117 |
| 14    | 0.986  | 0.8918 | 0.7152 | 0.8838 | 0.8777 | 0.6897 | 0.829  | 0.6261 |
| 14.25 | 1.0047 | 0.9106 | 0.7372 | 0.9057 | 0.8987 | 0.7039 | 0.8452 | 0.639  |
| 14.5  | 1.0233 | 0.9308 | 0.7608 | 0.9267 | 0.9217 | 0.7232 | 0.8634 | 0.6521 |
| 14.75 | 1.0397 | 0.9491 | 0.7825 | 0.9487 | 0.9454 | 0.7443 | 0.8817 | 0.6652 |
| 15    | 1.0577 | 0.966  | 0.8057 | 0.9651 | 0.9651 | 0.7624 | 0.8988 | 0.6766 |
| 15.25 | 1.0753 | 0.9853 | 0.8251 | 0.9841 | 0.9832 | 0.7813 | 0.9182 | 0.6906 |
| 15.5  | 1.0897 | 1.0015 | 0.8439 | 1.0056 | 1.0018 | 0.7997 | 0.9369 | 0.704  |
| 15.75 | 1.1049 | 1.0198 | 0.8628 | 1.0222 | 1.0194 | 0.8169 | 0.957  | 0.7166 |
| 16    | 1.1171 | 1.031  | 0.8817 | 1.0383 | 1.0346 | 0.8329 | 0.977  | 0.7327 |
| 16.25 | 1.1316 | 1.0487 | 0.8996 | 1.0529 | 1.0504 | 0.8517 | 0.9956 | 0.745  |
| 16.5  | 1.1443 | 1.0637 | 0.9165 | 1.0664 | 1.0652 | 0.8681 | 1.0134 | 0.7565 |
| 16.75 | 1.1579 | 1.0806 | 0.9342 | 1.0808 | 1.0816 | 0.881  | 1.0302 | 0.7683 |
| 17    | 1.1715 | 1.0952 | 0.9517 | 1.094  | 1.096  | 0.8958 | 1.0443 | 0.7803 |
| 17.25 | 1.1858 | 1.1114 | 0.9682 | 1.1077 | 1.1111 | 0.9099 | 1.0631 | 0.7939 |
| 17.5  | 1.2004 | 1.1256 | 0.9855 | 1.1186 | 1.1259 | 0.925  | 1.0796 | 0.8065 |
| 17.75 | 1.2123 | 1.1388 | 1.0016 | 1.1302 | 1.1387 | 0.9402 | 1.0966 | 0.8191 |
| 18    | 1.2261 | 1.1522 | 1.015  | 1.1423 | 1.149  | 0.9547 | 1.1118 | 0.8319 |
| 18.25 | 1.239  | 1.1664 | 1.0307 | 1.1549 | 1.1622 | 0.9664 | 1.1271 | 0.8434 |

|       |        |        |        |        |        |        |        |        |
|-------|--------|--------|--------|--------|--------|--------|--------|--------|
| 18.5  | 1.251  | 1.1779 | 1.0478 | 1.1661 | 1.1727 | 0.9797 | 1.1417 | 0.8554 |
| 18.75 | 1.2641 | 1.1907 | 1.0607 | 1.178  | 1.1826 | 0.9902 | 1.1557 | 0.8684 |
| 19    | 1.2773 | 1.2018 | 1.0765 | 1.1873 | 1.1966 | 1.0024 | 1.1708 | 0.8804 |
| 19.25 | 1.2907 | 1.2145 | 1.0891 | 1.1977 | 1.2066 | 1.0144 | 1.1853 | 0.8926 |
| 19.5  | 1.3032 | 1.2259 | 1.1041 | 1.2092 | 1.2171 | 1.0228 | 1.2002 | 0.9048 |
| 19.75 | 1.3141 | 1.239  | 1.1166 | 1.2209 | 1.2252 | 1.0339 | 1.2139 | 0.9172 |
| 20    | 1.3251 | 1.2497 | 1.1283 | 1.2291 | 1.2361 | 1.0434 | 1.2263 | 0.9284 |
| 20.25 | 1.3374 | 1.2637 | 1.1419 | 1.2394 | 1.2448 | 1.0532 | 1.2393 | 0.9418 |
| 20.5  | 1.3474 | 1.2743 | 1.1521 | 1.2494 | 1.255  | 1.0641 | 1.2543 | 0.9524 |
| 20.75 | 1.3589 | 1.2848 | 1.1637 | 1.2599 | 1.2637 | 1.0718 | 1.2665 | 0.9662 |
| 21    | 1.3704 | 1.2956 | 1.1744 | 1.2691 | 1.2724 | 1.0815 | 1.2803 | 0.9781 |
| 21.25 | 1.3806 | 1.3083 | 1.1829 | 1.2799 | 1.2821 | 1.0893 | 1.2923 | 0.9915 |
| 21.5  | 1.39   | 1.3184 | 1.1906 | 1.2865 | 1.2885 | 1.0979 | 1.306  | 1.0027 |
| 21.75 | 1.3999 | 1.3289 | 1.2037 | 1.2958 | 1.2977 | 1.1069 | 1.3172 | 1.0136 |
| 22    | 1.4093 | 1.3395 | 1.2116 | 1.3055 | 1.3054 | 1.1145 | 1.3289 | 1.0263 |
| 22.25 | 1.4189 | 1.3493 | 1.2223 | 1.3151 | 1.312  | 1.1209 | 1.3399 | 1.0368 |
| 22.5  | 1.4278 | 1.3589 | 1.2316 | 1.3227 | 1.3201 | 1.13   | 1.353  | 1.0477 |
| 22.75 | 1.4356 | 1.369  | 1.2391 | 1.3296 | 1.328  | 1.138  | 1.3632 | 1.0584 |
| 23    | 1.4425 | 1.3781 | 1.2485 | 1.3388 | 1.3361 | 1.1449 | 1.3744 | 1.0701 |
| 23.25 | 1.4488 | 1.3861 | 1.257  | 1.3471 | 1.3437 | 1.1514 | 1.3848 | 1.0804 |
| 23.5  | 1.4527 | 1.3947 | 1.2667 | 1.3533 | 1.3508 | 1.162  | 1.3936 | 1.0918 |
| 23.75 | 1.4559 | 1.4037 | 1.2752 | 1.3601 | 1.3587 | 1.1683 | 1.4033 | 1.1025 |
| 24    | 1.4583 | 1.4119 | 1.2845 | 1.3694 | 1.3642 | 1.1753 | 1.4128 | 1.1125 |
| 24.25 | 1.4609 | 1.4188 | 1.2937 | 1.375  | 1.3721 | 1.1819 | 1.423  | 1.1226 |
| 24.5  | 1.4615 | 1.4276 | 1.3014 | 1.3824 | 1.3786 | 1.1907 | 1.4321 | 1.1322 |
| 24.75 | 1.4635 | 1.4341 | 1.3101 | 1.3868 | 1.3858 | 1.1953 | 1.4405 | 1.1424 |
| 25    | 1.466  | 1.4379 | 1.3177 | 1.3924 | 1.3903 | 1.2042 | 1.4469 | 1.1514 |
| 25.25 | 1.4669 | 1.4431 | 1.3269 | 1.3964 | 1.3969 | 1.2093 | 1.4554 | 1.1614 |
| 25.5  | 1.4687 | 1.4476 | 1.3358 | 1.4024 | 1.402  | 1.2166 | 1.4624 | 1.1721 |
| 25.75 | 1.4687 | 1.4518 | 1.345  | 1.4051 | 1.4076 | 1.2216 | 1.4681 | 1.1799 |
| 26    | 1.4682 | 1.453  | 1.3526 | 1.4077 | 1.4111 | 1.225  | 1.4731 | 1.1881 |
| 26.25 | 1.4704 | 1.4557 | 1.3577 | 1.4099 | 1.4174 | 1.229  | 1.4795 | 1.1972 |
| 26.5  | 1.4702 | 1.4595 | 1.368  | 1.4153 | 1.4236 | 1.239  | 1.4855 | 1.2071 |
| 26.75 | 1.4706 | 1.4619 | 1.3756 | 1.4166 | 1.4274 | 1.2435 | 1.4895 | 1.2169 |
| 27    | 1.4716 | 1.4639 | 1.3808 | 1.4203 | 1.431  | 1.2507 | 1.4953 | 1.2267 |
| 27.25 | 1.4725 | 1.4677 | 1.3894 | 1.4216 | 1.4367 | 1.2578 | 1.5001 | 1.2372 |
| 27.5  | 1.473  | 1.4709 | 1.396  | 1.423  | 1.4399 | 1.2645 | 1.5016 | 1.2455 |
| 27.75 | 1.4747 | 1.4735 | 1.4025 | 1.4235 | 1.4437 | 1.2708 | 1.5051 | 1.2536 |
| 28    | 1.4747 | 1.4758 | 1.4095 | 1.4243 | 1.4485 | 1.2764 | 1.507  | 1.263  |
| 28.25 | 1.4772 | 1.4784 | 1.4156 | 1.4245 | 1.4517 | 1.2849 | 1.5088 | 1.2746 |
| 28.5  | 1.4758 | 1.4806 | 1.4201 | 1.4246 | 1.4545 | 1.2914 | 1.5096 | 1.2815 |
| 28.75 | 1.4763 | 1.4813 | 1.4239 | 1.4265 | 1.4576 | 1.2975 | 1.5106 | 1.2922 |

|       |        |        |        |        |        |        |        |        |
|-------|--------|--------|--------|--------|--------|--------|--------|--------|
| 29    | 1.4771 | 1.4829 | 1.4289 | 1.4269 | 1.4616 | 1.3057 | 1.5102 | 1.3018 |
| 29.25 | 1.4786 | 1.485  | 1.4341 | 1.428  | 1.4628 | 1.3133 | 1.5121 | 1.3107 |
| 29.5  | 1.4803 | 1.4861 | 1.4367 | 1.4283 | 1.4676 | 1.3204 | 1.5113 | 1.3178 |
| 29.75 | 1.4807 | 1.4866 | 1.4387 | 1.4279 | 1.4667 | 1.327  | 1.5125 | 1.3264 |
| 30    | 1.4823 | 1.4892 | 1.4412 | 1.4286 | 1.4698 | 1.332  | 1.5116 | 1.3326 |
| 30.25 | 1.4831 | 1.49   | 1.4444 | 1.4247 | 1.4664 | 1.3315 | 1.5072 | 1.3357 |
| 30.5  | 1.4829 | 1.4913 | 1.4444 | 1.4235 | 1.4663 | 1.3367 | 1.506  | 1.3417 |
| 30.75 | 1.4823 | 1.4923 | 1.4446 | 1.4239 | 1.4675 | 1.3433 | 1.5065 | 1.3475 |
| 31    | 1.4825 | 1.4929 | 1.4466 | 1.4221 | 1.4688 | 1.3499 | 1.5066 | 1.3561 |
| 31.25 | 1.4843 | 1.4939 | 1.448  | 1.4223 | 1.4695 | 1.3536 | 1.5067 | 1.3623 |
| 31.5  | 1.4842 | 1.496  | 1.4475 | 1.4219 | 1.4706 | 1.3575 | 1.5059 | 1.3695 |
| 31.75 | 1.4837 | 1.4956 | 1.4475 | 1.4221 | 1.4715 | 1.363  | 1.5066 | 1.376  |
| 32    | 1.4837 | 1.4964 | 1.4488 | 1.4227 | 1.4719 | 1.3688 | 1.5075 | 1.3844 |
| 32.25 | 1.4847 | 1.4969 | 1.4483 | 1.4234 | 1.4738 | 1.3715 | 1.507  | 1.3905 |
| 32.5  | 1.4848 | 1.4964 | 1.448  | 1.4233 | 1.4747 | 1.3765 | 1.5081 | 1.3964 |
| 32.75 | 1.4858 | 1.4974 | 1.448  | 1.4239 | 1.4747 | 1.3805 | 1.508  | 1.4019 |
| 33    | 1.4867 | 1.4992 | 1.4467 | 1.4229 | 1.4749 | 1.3839 | 1.5093 | 1.408  |
| 33.25 | 1.4876 | 1.498  | 1.4476 | 1.4236 | 1.4764 | 1.3867 | 1.5087 | 1.4124 |
| 33.5  | 1.4885 | 1.4993 | 1.4481 | 1.4243 | 1.4784 | 1.3893 | 1.5085 | 1.4161 |
| 33.75 | 1.4883 | 1.4994 | 1.4469 | 1.423  | 1.4757 | 1.3915 | 1.5079 | 1.4199 |
| 34    | 1.4888 | 1.4988 | 1.4474 | 1.423  | 1.4766 | 1.393  | 1.508  | 1.4232 |
| 34.25 | 1.4892 | 1.4995 | 1.4471 | 1.423  | 1.4768 | 1.3932 | 1.5082 | 1.427  |
| 34.5  | 1.4899 | 1.4996 | 1.4474 | 1.4236 | 1.4779 | 1.3954 | 1.5075 | 1.4267 |
| 34.75 | 1.4919 | 1.5003 | 1.4472 | 1.4219 | 1.4784 | 1.396  | 1.5083 | 1.4281 |
| 35    | 1.492  | 1.5014 | 1.4486 | 1.4213 | 1.479  | 1.398  | 1.5073 | 1.4297 |
| 35.25 | 1.4922 | 1.502  | 1.4486 | 1.4215 | 1.4799 | 1.3985 | 1.5065 | 1.43   |
| 35.5  | 1.4933 | 1.5004 | 1.4477 | 1.4224 | 1.4803 | 1.3984 | 1.5072 | 1.4286 |
| 35.75 | 1.4939 | 1.5019 | 1.4479 | 1.4221 | 1.4798 | 1.3997 | 1.508  | 1.4291 |
| 36    | 1.4951 | 1.5018 | 1.4476 | 1.4212 | 1.4803 | 1.3998 | 1.507  | 1.4275 |
| 36.25 | 1.4965 | 1.5015 | 1.4469 | 1.4211 | 1.4798 | 1.4002 | 1.5062 | 1.4273 |
| 36.5  | 1.4976 | 1.5021 | 1.4473 | 1.4203 | 1.4798 | 1.4018 | 1.5058 | 1.4258 |
| 36.75 | 1.4983 | 1.5037 | 1.4481 | 1.4162 | 1.4793 | 1.3965 | 1.5028 | 1.4215 |
| 37    | 1.4992 | 1.5034 | 1.4477 | 1.4147 | 1.4779 | 1.399  | 1.5015 | 1.4193 |
| 37.25 | 1.4997 | 1.504  | 1.449  | 1.4139 | 1.4786 | 1.3995 | 1.5015 | 1.4178 |
| 37.5  | 1.5011 | 1.5037 | 1.4489 | 1.4126 | 1.4775 | 1.3992 | 1.5023 | 1.4173 |
| 37.75 | 1.502  | 1.505  | 1.4486 | 1.4124 | 1.4777 | 1.3998 | 1.5021 | 1.4156 |
| 38    | 1.5029 | 1.5047 | 1.4475 | 1.4121 | 1.4782 | 1.4006 | 1.5004 | 1.4146 |
| 38.25 | 1.5029 | 1.5046 | 1.449  | 1.4119 | 1.4779 | 1.4007 | 1.5002 | 1.4135 |
| 38.5  | 1.504  | 1.505  | 1.4481 | 1.4115 | 1.4787 | 1.4012 | 1.5004 | 1.4134 |
| 38.75 | 1.5035 | 1.5042 | 1.448  | 1.4121 | 1.4769 | 1.402  | 1.5005 | 1.4138 |
| 39    | 1.5042 | 1.505  | 1.4488 | 1.4119 | 1.4795 | 1.4015 | 1.5008 | 1.4132 |
| 39.25 | 1.5058 | 1.5049 | 1.4482 | 1.4108 | 1.478  | 1.4029 | 1.5008 | 1.4129 |

|       |        |        |        |        |        |        |        |        |
|-------|--------|--------|--------|--------|--------|--------|--------|--------|
| 39.5  | 1.507  | 1.5052 | 1.4485 | 1.4125 | 1.4794 | 1.4026 | 1.4997 | 1.4108 |
| 39.75 | 1.5073 | 1.506  | 1.4484 | 1.4116 | 1.4791 | 1.4043 | 1.5007 | 1.4117 |
| 40    | 1.5077 | 1.5062 | 1.4489 | 1.4115 | 1.4789 | 1.4036 | 1.5002 | 1.4116 |
| 40.25 | 1.5093 | 1.5063 | 1.4496 | 1.4114 | 1.4794 | 1.4051 | 1.4997 | 1.4116 |
| 40.5  | 1.5096 | 1.506  | 1.4489 | 1.4107 | 1.4792 | 1.4051 | 1.5002 | 1.4115 |
| 40.75 | 1.5108 | 1.5059 | 1.4494 | 1.4117 | 1.4799 | 1.4054 | 1.5    | 1.412  |
| 41    | 1.5129 | 1.5053 | 1.4485 | 1.4106 | 1.4792 | 1.4053 | 1.4994 | 1.4115 |
| 41.25 | 1.5127 | 1.5048 | 1.4491 | 1.4106 | 1.4801 | 1.405  | 1.4994 | 1.411  |
| 41.5  | 1.513  | 1.5052 | 1.4495 | 1.4113 | 1.4793 | 1.4047 | 1.4994 | 1.4121 |
| 41.75 | 1.513  | 1.5045 | 1.4496 | 1.4097 | 1.4797 | 1.4048 | 1.4995 | 1.411  |
| 42    | 1.5143 | 1.506  | 1.4492 | 1.4099 | 1.4797 | 1.4048 | 1.4993 | 1.4099 |
| 42.25 | 1.5164 | 1.506  | 1.4512 | 1.4101 | 1.4812 | 1.4059 | 1.4989 | 1.4106 |
| 42.5  | 1.5166 | 1.5062 | 1.4516 | 1.4104 | 1.4804 | 1.4058 | 1.4981 | 1.4113 |
| 42.75 | 1.518  | 1.506  | 1.4518 | 1.4095 | 1.4799 | 1.4052 | 1.4985 | 1.411  |
| 43    | 1.5154 | 1.5053 | 1.4522 | 1.4086 | 1.4808 | 1.405  | 1.4991 | 1.4105 |
| 43.25 | 1.5129 | 1.5059 | 1.4522 | 1.4093 | 1.48   | 1.405  | 1.4978 | 1.411  |
| 43.5  | 1.5111 | 1.5064 | 1.4527 | 1.4095 | 1.4794 | 1.406  | 1.4976 | 1.4116 |
| 43.75 | 1.5114 | 1.5084 | 1.453  | 1.4102 | 1.4794 | 1.4056 | 1.4979 | 1.4118 |
| 44    | 1.5125 | 1.5078 | 1.4529 | 1.4092 | 1.4805 | 1.4059 | 1.4993 | 1.4117 |
| 44.25 | 1.5102 | 1.5073 | 1.4529 | 1.4076 | 1.4807 | 1.4049 | 1.4976 | 1.4115 |
| 44.5  | 1.5105 | 1.5065 | 1.4523 | 1.4084 | 1.4808 | 1.4049 | 1.4977 | 1.4133 |
| 44.75 | 1.5104 | 1.5065 | 1.454  | 1.4074 | 1.4816 | 1.4049 | 1.498  | 1.4131 |
| 45    | 1.5092 | 1.5064 | 1.4543 | 1.4071 | 1.4804 | 1.4054 | 1.4986 | 1.4137 |
| 45.25 | 1.5105 | 1.5057 | 1.4541 | 1.4086 | 1.4816 | 1.4059 | 1.4991 | 1.4152 |
| 45.5  | 1.5103 | 1.5065 | 1.4557 | 1.4069 | 1.4801 | 1.405  | 1.4993 | 1.4152 |
| 45.75 | 1.51   | 1.5067 | 1.4559 | 1.4067 | 1.4809 | 1.4055 | 1.4996 | 1.4152 |
| 46    | 1.5108 | 1.5061 | 1.4561 | 1.4056 | 1.4805 | 1.406  | 1.4987 | 1.4149 |
| 46.25 | 1.5109 | 1.5064 | 1.456  | 1.4057 | 1.4802 | 1.4049 | 1.4991 | 1.4154 |
| 46.5  | 1.511  | 1.5069 | 1.4571 | 1.4065 | 1.4812 | 1.4058 | 1.4987 | 1.4157 |
| 46.75 | 1.511  | 1.5052 | 1.4577 | 1.4051 | 1.4802 | 1.4052 | 1.4991 | 1.4153 |
| 47    | 1.5111 | 1.5059 | 1.4574 | 1.4056 | 1.481  | 1.4055 | 1.4982 | 1.4165 |
| 47.25 | 1.5102 | 1.5042 | 1.4571 | 1.4055 | 1.4801 | 1.4057 | 1.5003 | 1.4166 |
| 47.5  | 1.5112 | 1.5044 | 1.4583 | 1.405  | 1.4803 | 1.4046 | 1.4983 | 1.4176 |
| 47.75 | 1.5109 | 1.5036 | 1.4575 | 1.4039 | 1.4796 | 1.4052 | 1.4975 | 1.4182 |
| 48    | 1.511  | 1.5046 | 1.4582 | 1.4051 | 1.4789 | 1.4048 | 1.4987 | 1.4187 |
| 48.25 | 1.511  | 1.5042 | 1.4587 | 1.4043 | 1.4801 | 1.4065 | 1.4977 | 1.4195 |
| 48.5  | 1.5111 | 1.504  | 1.4592 | 1.4044 | 1.4802 | 1.4056 | 1.499  | 1.4194 |
| 48.75 | 1.5107 | 1.5019 | 1.4578 | 1.4035 | 1.4806 | 1.4046 | 1.4977 | 1.4199 |
| 49    | 1.5112 | 1.5026 | 1.4586 | 1.4037 | 1.4788 | 1.4054 | 1.4983 | 1.4206 |
| 49.25 | 1.5109 | 1.5034 | 1.4604 | 1.4039 | 1.4788 | 1.4061 | 1.4989 | 1.4212 |
| 49.5  | 1.5094 | 1.504  | 1.4603 | 1.4035 | 1.4789 | 1.4055 | 1.4985 | 1.4205 |
| 49.75 | 1.5105 | 1.5038 | 1.4602 | 1.4033 | 1.4781 | 1.4054 | 1.4992 | 1.4203 |

| <b>N14</b>   | <b>N15</b>    | <b>N16</b>    |
|--------------|---------------|---------------|
| <b>RAD 3</b> | <b>RAD 10</b> | <b>RAD 30</b> |
| 0.1691       | 0.1779        | 0.1781        |
| 0.1581       | 0.1689        | 0.1685        |
| 0.1563       | 0.1675        | 0.1672        |
| 0.1542       | 0.1657        | 0.1663        |
| 0.1542       | 0.1652        | 0.1653        |
| 0.1551       | 0.1669        | 0.1666        |
| .1567        | 0.1674        | 0.1673        |
| 0.158        | 0.168         | 0.1669        |
| .1599        | 0.1694        | 0.1669        |
| .1616        | 0.1705        | 0.169         |
| .1641        | 0.1732        | 0.1714        |
| .1672        | 0.1759        | 0.1736        |
| .1704        | 0.1787        | 0.1758        |
| 0.174        | 0.1807        | 0.178         |
| .1782        | 0.1847        | 0.1814        |
| .1824        | 0.1893        | 0.1849        |
| .1869        | 0.1932        | 0.188         |
| .1919        | 0.197         | 0.1915        |
| .1981        | 0.2022        | 0.1948        |
| .2039        | 0.2068        | 0.1993        |
| .2113        | 0.212         | 0.2026        |
| .2181        | 0.2175        | 0.2077        |
| .2246        | 0.2234        | 0.212         |
| .2321        | 0.2291        | 0.2157        |
| .2401        | 0.2355        | 0.2204        |
| .2489        | 0.2416        | 0.2258        |
| .2574        | 0.2492        | 0.2312        |
| .2662        | 0.2554        | 0.2361        |
| .2776        | 0.2636        | 0.2414        |
| .2864        | 0.2706        | 0.2468        |
| .2975        | 0.2784        | 0.2525        |
| .3078        | 0.2869        | 0.2581        |

|        |        |        |
|--------|--------|--------|
| .3188  | 0.2948 | 0.2631 |
| .3307  | 0.304  | 0.2687 |
| 0.343  | 0.3143 | 0.2757 |
| .3551  | 0.3217 | 0.2811 |
| .3693  | 0.3326 | 0.2874 |
| 0.383  | 0.3433 | 0.2938 |
| 0.398  | 0.3544 | 0.3013 |
| 0.4135 | 0.3657 | 0.3083 |
| 0.4306 | 0.3763 | 0.3147 |
| 0.4475 | 0.3887 | 0.3212 |
| 0.466  | 0.4012 | 0.3299 |
| 0.4867 | 0.4144 | 0.3376 |
| 0.5057 | 0.4256 | 0.3449 |
| 0.5261 | 0.4383 | 0.3528 |
| 0.5475 | 0.4504 | 0.3615 |
| 0.5683 | 0.4641 | 0.3678 |
| 0.5899 | 0.478  | 0.3769 |
| 0.612  | 0.4913 | 0.3847 |
| 0.6354 | 0.5048 | 0.392  |
| 0.6578 | 0.5176 | 0.3975 |
| 0.6814 | 0.5335 | 0.4052 |
| 0.7047 | 0.5457 | 0.4113 |
| 0.7266 | 0.5604 | 0.4187 |
| 0.7507 | 0.5747 | 0.4248 |
| 0.7745 | 0.5913 | 0.4334 |
| 0.7987 | 0.6049 | 0.4399 |
| 0.8229 | 0.6208 | 0.4481 |
| 0.8448 | 0.6357 | 0.4555 |
| 0.8621 | 0.6545 | 0.4642 |
| 0.8831 | 0.6686 | 0.471  |
| 0.9036 | 0.6851 | 0.4793 |
| 0.9232 | 0.6989 | 0.4878 |
| 0.9426 | 0.7148 | 0.4975 |
| 0.9599 | 0.7309 | 0.5047 |
| 0.9762 | 0.7456 | 0.5135 |
| 0.9927 | 0.761  | 0.522  |
| 1.0091 | 0.7744 | 0.5307 |
| 1.0242 | 0.7886 | 0.5393 |
| 1.0394 | 0.801  | 0.5475 |
| 1.0531 | 0.8144 | 0.555  |
| 1.0675 | 0.8281 | 0.5647 |
| 1.0787 | 0.8413 | 0.5734 |

|        |        |        |
|--------|--------|--------|
| 1.0915 | 0.8545 | 0.5798 |
| 1.1043 | 0.8657 | 0.5895 |
| 1.1148 | 0.8777 | 0.5986 |
| 1.1261 | 0.8907 | 0.6076 |
| 1.1364 | 0.9024 | 0.616  |
| 1.1477 | 0.9125 | 0.6233 |
| 1.1567 | 0.9217 | 0.6325 |
| 1.1673 | 0.9292 | 0.6403 |
| 1.1756 | 0.9406 | 0.648  |
| 1.1865 | 0.9488 | 0.6559 |
| 1.1943 | 0.9601 | 0.6652 |
| 1.2026 | 0.9672 | 0.673  |
| 1.2124 | 0.9743 | 0.6802 |
| 1.2188 | 0.9815 | 0.688  |
| 1.2278 | 0.9892 | 0.6947 |
| 1.2347 | 0.9967 | 0.7035 |
| 1.2442 | 1.0028 | 0.7112 |
| 1.25   | 1.0103 | 0.718  |
| 1.2577 | 1.0168 | 0.7234 |
| 1.2642 | 1.024  | 0.731  |
| 1.2716 | 1.0293 | 0.7383 |
| 1.277  | 1.0349 | 0.7452 |
| 1.284  | 1.042  | 0.751  |
| 1.2894 | 1.0483 | 0.7579 |
| 1.2965 | 1.0537 | 0.7656 |
| 1.3027 | 1.0609 | 0.7716 |
| 1.3105 | 1.0662 | 0.7768 |
| 1.3128 | 1.0709 | 0.7823 |
| 1.3184 | 1.0773 | 0.7871 |
| 1.324  | 1.0817 | 0.7931 |
| 1.3294 | 1.0888 | 0.7977 |
| 1.3355 | 1.0952 | 0.8034 |
| 1.3421 | 1.1012 | 0.8078 |
| 1.3488 | 1.1065 | 0.8135 |
| 1.3533 | 1.1141 | 0.8188 |
| 1.3597 | 1.1191 | 0.8244 |
| 1.3645 | 1.1244 | 0.8299 |
| 1.3708 | 1.1319 | 0.835  |
| 1.3771 | 1.1387 | 0.8398 |
| 1.382  | 1.1447 | 0.8429 |
| 1.3877 | 1.1511 | 0.8501 |
| 1.395  | 1.1588 | 0.8545 |



|        |        |        |
|--------|--------|--------|
| 1.3992 | 1.1669 | 0.86   |
| 1.4063 | 1.173  | 0.8668 |
| 1.4094 | 1.1803 | 0.8717 |
| 1.4158 | 1.1842 | 0.8759 |
| 1.42   | 1.1912 | 0.8815 |
| 1.4263 | 1.1986 | 0.8885 |
| 1.4311 | 1.2041 | 0.8901 |
| 1.4358 | 1.2088 | 0.896  |
| 1.4387 | 1.2153 | 0.9015 |
| 1.4428 | 1.2212 | 0.906  |
| 1.4463 | 1.2273 | 0.9124 |
| 1.4493 | 1.2321 | 0.9162 |
| 1.453  | 1.2393 | 0.9223 |
| 1.4563 | 1.2462 | 0.9261 |
| 1.4609 | 1.2521 | 0.9318 |
| 1.4609 | 1.2569 | 0.9389 |
| 1.4633 | 1.2635 | 0.9448 |
| 1.4659 | 1.2693 | 0.9495 |
| 1.4651 | 1.2761 | 0.9553 |
| 1.4678 | 1.2794 | 0.9614 |
| 1.4687 | 1.286  | 0.9673 |
| 1.4694 | 1.2926 | 0.9717 |
| 1.4693 | 1.2978 | 0.9798 |
| 1.4689 | 1.3041 | 0.9838 |
| 1.4707 | 1.3112 | 0.9908 |
| 1.469  | 1.3153 | 0.9958 |
| 1.4675 | 1.3215 | 1.0008 |
| 1.4686 | 1.3282 | 1.0093 |
| 1.467  | 1.3305 | 1.0124 |
| 1.4683 | 1.3372 | 1.0195 |
| 1.4672 | 1.3425 | 1.023  |
| 1.4678 | 1.3461 | 1.029  |
| 1.4675 | 1.3519 | 1.0314 |
| 1.4674 | 1.3566 | 1.0388 |
| 1.4677 | 1.3607 | 1.0435 |
| 1.4678 | 1.3658 | 1.0476 |
| 1.4668 | 1.3713 | 1.0545 |
| 1.467  | 1.3775 | 1.0579 |
| 1.4672 | 1.38   | 1.0646 |
| 1.4667 | 1.3862 | 1.0693 |
| 1.4671 | 1.391  | 1.0758 |
| 1.4653 | 1.3946 | 1.082  |

|        |        |        |
|--------|--------|--------|
| 1.4664 | 1.3993 | 1.0871 |
| 1.466  | 1.401  | 1.0893 |
| 1.4659 | 1.4044 | 1.0955 |
| 1.4648 | 1.4084 | 1.1012 |
| 1.4653 | 1.41   | 1.1065 |
| 1.4649 | 1.4107 | 1.109  |
| 1.4657 | 1.4138 | 1.1158 |
| 1.4649 | 1.4138 | 1.1205 |
| 1.4645 | 1.4163 | 1.1253 |
| 1.4636 | 1.4154 | 1.1292 |
| 1.4631 | 1.4153 | 1.1346 |
| 1.4627 | 1.416  | 1.1398 |
| 1.4626 | 1.4157 | 1.1456 |
| 1.4631 | 1.4165 | 1.1517 |
| 1.4624 | 1.4168 | 1.1556 |
| 1.4623 | 1.4167 | 1.1621 |
| 1.4621 | 1.4162 | 1.1649 |
| 1.4621 | 1.4181 | 1.1704 |
| 1.4627 | 1.4183 | 1.1753 |
| 1.4624 | 1.4175 | 1.1808 |
| 1.4622 | 1.4181 | 1.1841 |
| 1.4606 | 1.419  | 1.1891 |
| 1.4604 | 1.4196 | 1.1943 |
| 1.4616 | 1.4186 | 1.2005 |
| 1.4626 | 1.4187 | 1.2065 |
| 1.4613 | 1.4185 | 1.2082 |
| 1.4614 | 1.4196 | 1.2145 |
| 1.4611 | 1.4193 | 1.2185 |
| 1.4617 | 1.4189 | 1.2207 |
| 1.461  | 1.419  | 1.226  |
| 1.4611 | 1.4197 | 1.2335 |
| 1.4607 | 1.4187 | 1.2366 |
| 1.4617 | 1.4202 | 1.2404 |
| 1.4605 | 1.4198 | 1.2449 |
| 1.4606 | 1.4199 | 1.2498 |
| 1.4598 | 1.4204 | 1.2541 |
| 1.4609 | 1.4195 | 1.2593 |
| 1.4595 | 1.4198 | 1.2632 |
| 1.4605 | 1.4195 | 1.2665 |
| 1.4607 | 1.4179 | 1.2722 |
| 1.4593 | 1.4195 | 1.2746 |
| 1.4607 | 1.4192 | 1.2779 |

|      | K9     |          | K10       |         | K11    |        | K12      |          | K13      |           | K14    |        |
|------|--------|----------|-----------|---------|--------|--------|----------|----------|----------|-----------|--------|--------|
| TIME | WT     | WT(GA 3) | WT(RAD 3) | NO DRUG | GA 3uM | GA 7uM | NOVO 100 | NOVO 250 | NOVO 500 | NOVO 1000 | RAD 3  | RAD 10 |
| 0    | 0.1894 | 0.2051   | 0.1892    | 0.1813  | 0.1649 | 0.1662 | 0.2074   | 0.3434   | 0.3434   | 0.3434    | 0.1532 | 0.1532 |
| 0.25 | 0.1844 | 0.1929   | 0.1812    | 0.1711  | 0.1577 | 0.1562 | 0.2093   | 0.3309   | 0.3309   | 0.3309    | 0.1409 | 0.1409 |
| 0.5  | 0.1833 | 0.1912   | 0.1787    | 0.1662  | 0.153  | 0.1512 | 0.2076   | 0.3183   | 0.3183   | 0.3183    | 0.1366 | 0.1366 |
| 0.75 | 0.1838 | 0.189    | 0.1758    | 0.1649  | 0.1515 | 0.151  | 0.206    | 0.3087   | 0.3087   | 0.3087    | 0.1358 | 0.1358 |
| 1    | 0.1843 | 0.1877   | 0.1818    | 0.1648  | 0.1514 | 0.1487 | 0.2054   | 0.301    | 0.301    | 0.301     | 0.1356 | 0.1356 |

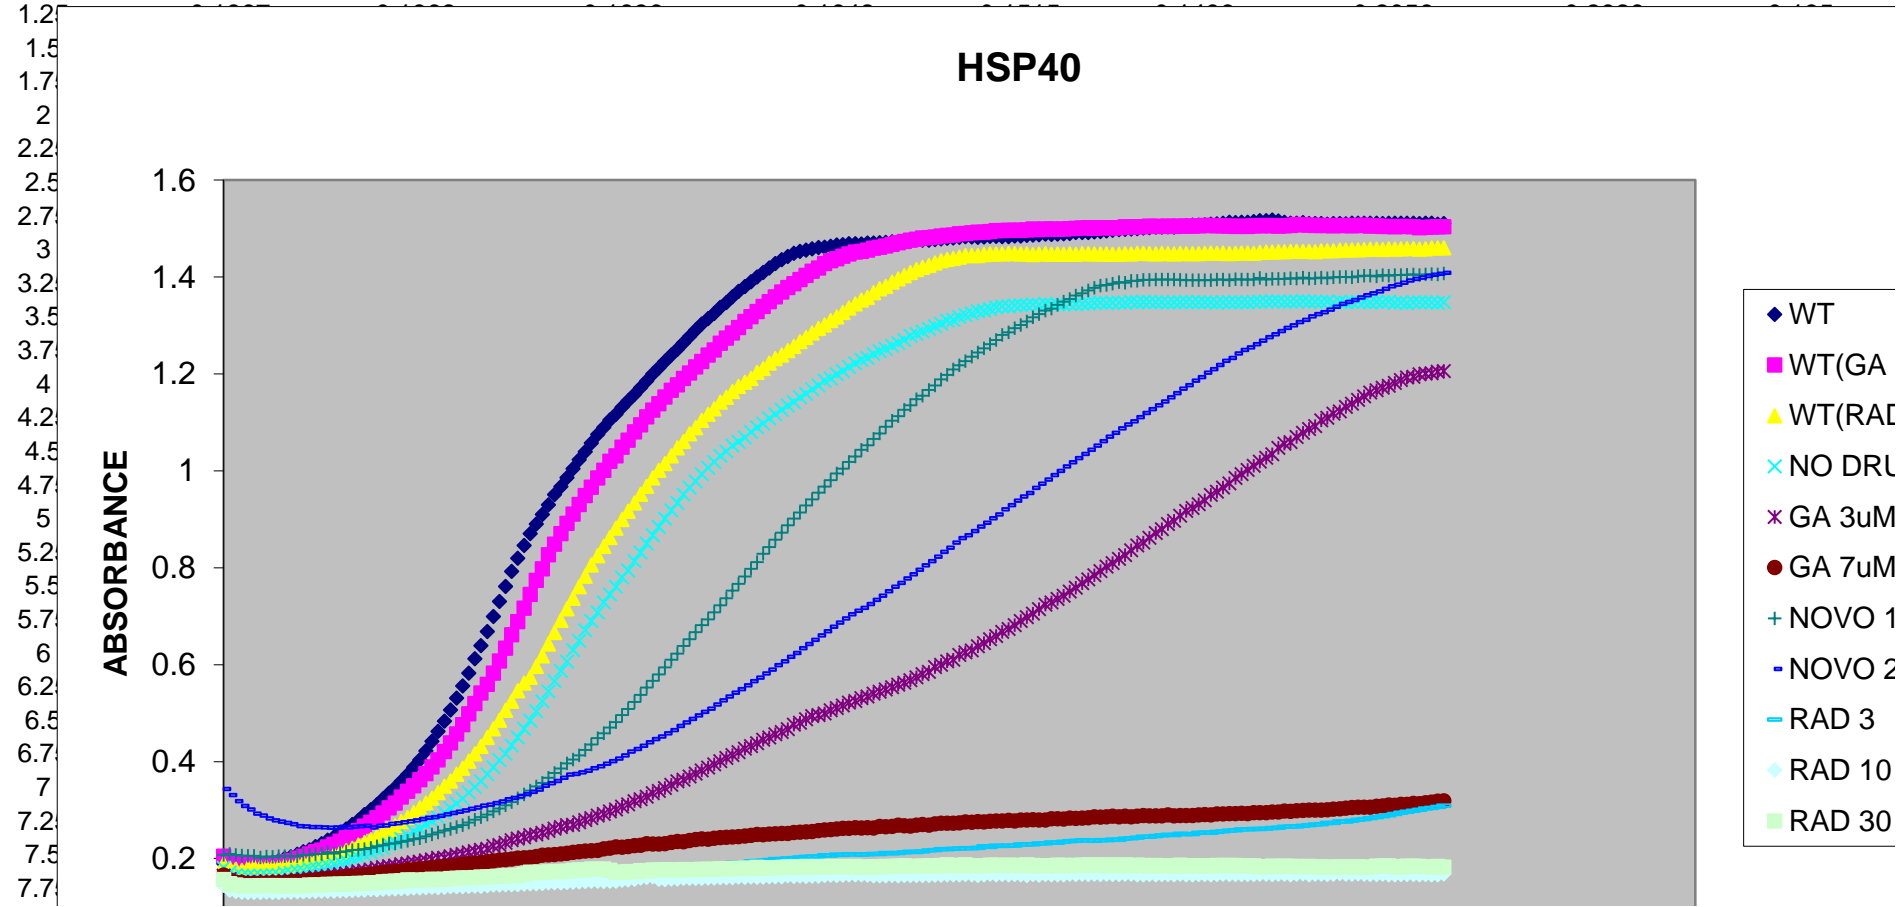

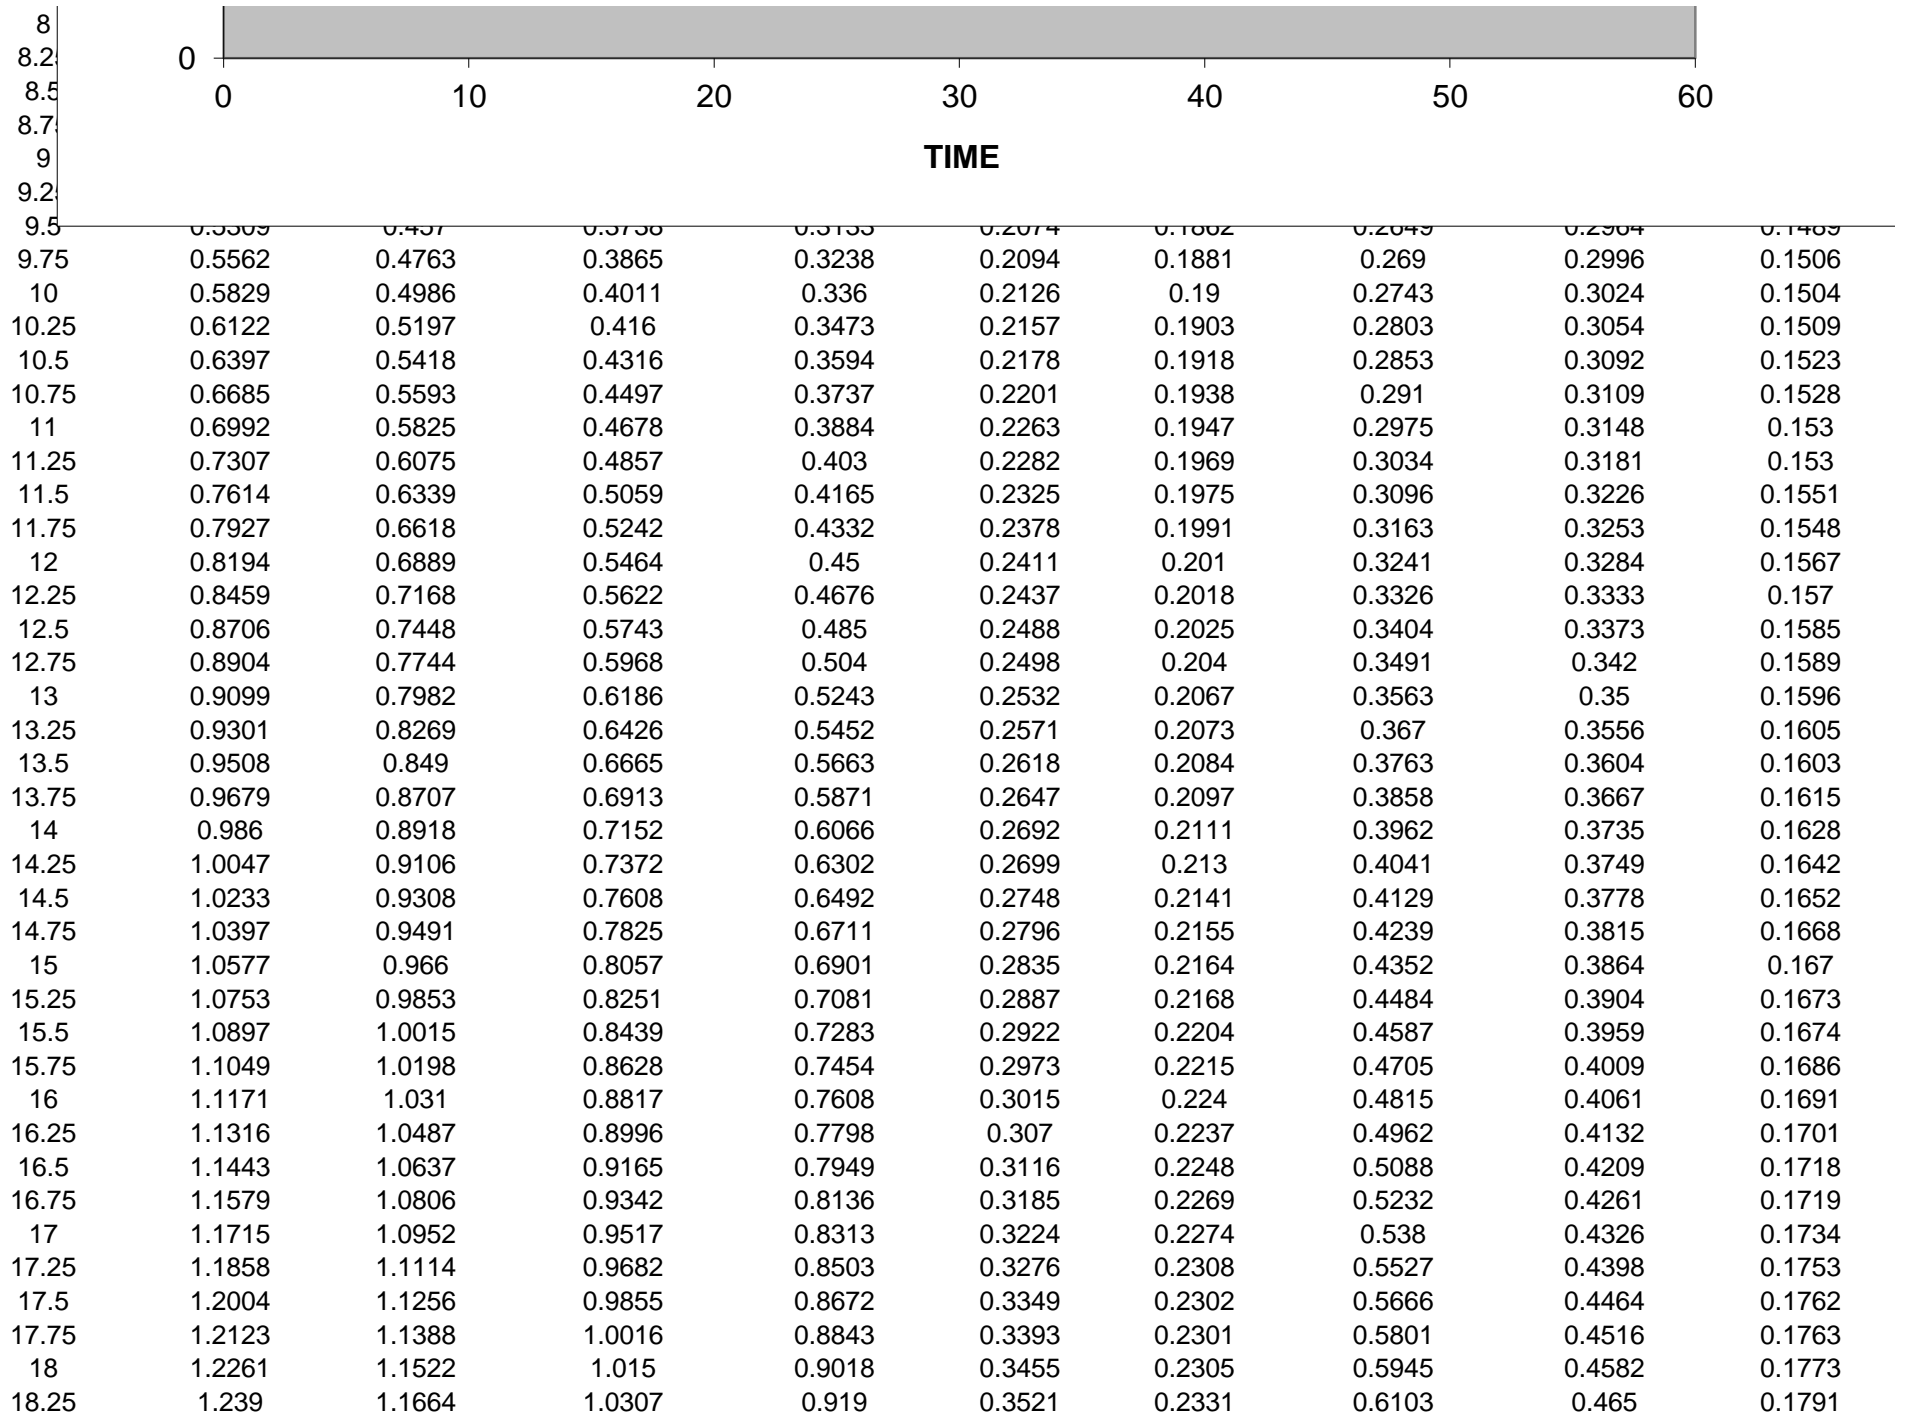

|       |        |        |        |        |        |        |        |        |        |
|-------|--------|--------|--------|--------|--------|--------|--------|--------|--------|
| 18.5  | 1.251  | 1.1779 | 1.0478 | 0.9337 | 0.3591 | 0.2354 | 0.6231 | 0.4735 | 0.1791 |
| 18.75 | 1.2641 | 1.1907 | 1.0607 | 0.9508 | 0.3627 | 0.2347 | 0.6389 | 0.4808 | 0.1806 |
| 19    | 1.2773 | 1.2018 | 1.0765 | 0.9658 | 0.3691 | 0.2373 | 0.6523 | 0.4881 | 0.1809 |
| 19.25 | 1.2907 | 1.2145 | 1.0891 | 0.9785 | 0.3751 | 0.2391 | 0.6671 | 0.4956 | 0.182  |
| 19.5  | 1.3032 | 1.2259 | 1.1041 | 0.9936 | 0.3821 | 0.2403 | 0.6815 | 0.5024 | 0.1833 |
| 19.75 | 1.3141 | 1.239  | 1.1166 | 1.0068 | 0.3881 | 0.2396 | 0.6938 | 0.5096 | 0.1851 |
| 20    | 1.3251 | 1.2497 | 1.1283 | 1.0184 | 0.3945 | 0.2417 | 0.7079 | 0.5181 | 0.1853 |
| 20.25 | 1.3374 | 1.2637 | 1.1419 | 1.0311 | 0.4012 | 0.2434 | 0.7226 | 0.5262 | 0.1875 |
| 20.5  | 1.3474 | 1.2743 | 1.1521 | 1.0404 | 0.4074 | 0.2438 | 0.7374 | 0.5341 | 0.1882 |
| 20.75 | 1.3589 | 1.2848 | 1.1637 | 1.052  | 0.4133 | 0.2443 | 0.7528 | 0.5421 | 0.1907 |
| 21    | 1.3704 | 1.2956 | 1.1744 | 1.06   | 0.4197 | 0.2454 | 0.7669 | 0.5496 | 0.1913 |
| 21.25 | 1.3806 | 1.3083 | 1.1829 | 1.0688 | 0.4265 | 0.2462 | 0.7823 | 0.5576 | 0.1921 |
| 21.5  | 1.39   | 1.3184 | 1.1906 | 1.0804 | 0.4318 | 0.2475 | 0.7978 | 0.5658 | 0.1944 |
| 21.75 | 1.3999 | 1.3289 | 1.2037 | 1.0895 | 0.4377 | 0.2498 | 0.8116 | 0.5732 | 0.1953 |
| 22    | 1.4093 | 1.3395 | 1.2116 | 1.098  | 0.4453 | 0.249  | 0.8288 | 0.582  | 0.1959 |
| 22.25 | 1.4189 | 1.3493 | 1.2223 | 1.1083 | 0.4501 | 0.2504 | 0.8426 | 0.5898 | 0.1971 |
| 22.5  | 1.4278 | 1.3589 | 1.2316 | 1.1171 | 0.4565 | 0.2508 | 0.8578 | 0.5989 | 0.199  |
| 22.75 | 1.4356 | 1.369  | 1.2391 | 1.1261 | 0.4614 | 0.252  | 0.8722 | 0.6071 | 0.1992 |
| 23    | 1.4425 | 1.3781 | 1.2485 | 1.1348 | 0.4668 | 0.2521 | 0.8876 | 0.6162 | 0.2    |
| 23.25 | 1.4488 | 1.3861 | 1.257  | 1.142  | 0.4761 | 0.2535 | 0.9017 | 0.6242 | 0.201  |
| 23.5  | 1.4527 | 1.3947 | 1.2667 | 1.1516 | 0.48   | 0.2546 | 0.9142 | 0.6341 | 0.2024 |
| 23.75 | 1.4559 | 1.4037 | 1.2752 | 1.159  | 0.4877 | 0.2554 | 0.9286 | 0.6426 | 0.2036 |
| 24    | 1.4583 | 1.4119 | 1.2845 | 1.1684 | 0.4942 | 0.2559 | 0.9412 | 0.6516 | 0.2041 |
| 24.25 | 1.4609 | 1.4188 | 1.2937 | 1.176  | 0.4962 | 0.2574 | 0.9551 | 0.6607 | 0.2041 |
| 24.5  | 1.4615 | 1.4276 | 1.3014 | 1.1862 | 0.4996 | 0.2592 | 0.9679 | 0.669  | 0.2067 |
| 24.75 | 1.4635 | 1.4341 | 1.3101 | 1.1911 | 0.5058 | 0.2599 | 0.9811 | 0.6784 | 0.2063 |
| 25    | 1.466  | 1.4379 | 1.3177 | 1.1995 | 0.5108 | 0.2609 | 0.9944 | 0.687  | 0.2083 |
| 25.25 | 1.4669 | 1.4431 | 1.3269 | 1.2062 | 0.5156 | 0.2621 | 1.0049 | 0.6953 | 0.2074 |
| 25.5  | 1.4687 | 1.4476 | 1.3358 | 1.2145 | 0.5217 | 0.2623 | 1.0187 | 0.7042 | 0.2087 |
| 25.75 | 1.4687 | 1.4518 | 1.345  | 1.2217 | 0.5249 | 0.2639 | 1.0298 | 0.7114 | 0.2088 |
| 26    | 1.4682 | 1.453  | 1.3526 | 1.2288 | 0.5313 | 0.2631 | 1.0433 | 0.7174 | 0.208  |
| 26.25 | 1.4704 | 1.4557 | 1.3577 | 1.2334 | 0.5346 | 0.2638 | 1.0531 | 0.7255 | 0.2086 |
| 26.5  | 1.4702 | 1.4595 | 1.368  | 1.2407 | 0.5406 | 0.2633 | 1.0661 | 0.7337 | 0.2095 |
| 26.75 | 1.4706 | 1.4619 | 1.3756 | 1.2467 | 0.5442 | 0.2662 | 1.0771 | 0.7426 | 0.2096 |
| 27    | 1.4716 | 1.4639 | 1.3808 | 1.2516 | 0.5492 | 0.2657 | 1.0911 | 0.7514 | 0.2112 |
| 27.25 | 1.4725 | 1.4677 | 1.3894 | 1.2584 | 0.5534 | 0.2664 | 1.1038 | 0.7609 | 0.211  |
| 27.5  | 1.473  | 1.4709 | 1.396  | 1.2642 | 0.5588 | 0.2688 | 1.113  | 0.7687 | 0.2117 |
| 27.75 | 1.4747 | 1.4735 | 1.4025 | 1.27   | 0.5631 | 0.2676 | 1.1261 | 0.7779 | 0.2128 |
| 28    | 1.4747 | 1.4758 | 1.4095 | 1.2785 | 0.5684 | 0.267  | 1.1353 | 0.7867 | 0.2139 |
| 28.25 | 1.4772 | 1.4784 | 1.4156 | 1.2827 | 0.5739 | 0.269  | 1.1478 | 0.7961 | 0.2133 |
| 28.5  | 1.4758 | 1.4806 | 1.4201 | 1.2877 | 0.5804 | 0.2704 | 1.1552 | 0.8052 | 0.2151 |
| 28.75 | 1.4763 | 1.4813 | 1.4239 | 1.2932 | 0.5854 | 0.2691 | 1.1668 | 0.8139 | 0.2168 |

|       |        |        |        |        |        |        |        |        |        |
|-------|--------|--------|--------|--------|--------|--------|--------|--------|--------|
| 29    | 1.4771 | 1.4829 | 1.4289 | 1.2985 | 0.5953 | 0.2716 | 1.1761 | 0.823  | 0.2172 |
| 29.25 | 1.4786 | 1.485  | 1.4341 | 1.3039 | 0.5997 | 0.2726 | 1.189  | 0.8332 | 0.2191 |
| 29.5  | 1.4803 | 1.4861 | 1.4367 | 1.3103 | 0.6069 | 0.2729 | 1.1979 | 0.8417 | 0.2193 |
| 29.75 | 1.4807 | 1.4866 | 1.4387 | 1.3114 | 0.6102 | 0.2732 | 1.2093 | 0.8518 | 0.2201 |
| 30    | 1.4823 | 1.4892 | 1.4412 | 1.3173 | 0.6201 | 0.2739 | 1.2176 | 0.8613 | 0.2207 |
| 30.25 | 1.4831 | 1.49   | 1.4444 | 1.3217 | 0.6255 | 0.2754 | 1.2265 | 0.867  | 0.2215 |
| 30.5  | 1.4829 | 1.4913 | 1.4444 | 1.3248 | 0.6295 | 0.275  | 1.236  | 0.8757 | 0.2211 |
| 30.75 | 1.4823 | 1.4923 | 1.4446 | 1.3295 | 0.6378 | 0.2762 | 1.2443 | 0.8851 | 0.222  |
| 31    | 1.4825 | 1.4929 | 1.4466 | 1.331  | 0.6447 | 0.2756 | 1.2531 | 0.8928 | 0.2253 |
| 31.25 | 1.4843 | 1.4939 | 1.448  | 1.3339 | 0.6523 | 0.2768 | 1.2618 | 0.9021 | 0.2239 |
| 31.5  | 1.4842 | 1.496  | 1.4475 | 1.3372 | 0.6594 | 0.2776 | 1.2704 | 0.9102 | 0.2264 |
| 31.75 | 1.4837 | 1.4956 | 1.4475 | 1.3391 | 0.668  | 0.2774 | 1.2805 | 0.9205 | 0.2259 |
| 32    | 1.4837 | 1.4964 | 1.4488 | 1.3391 | 0.6735 | 0.2791 | 1.2857 | 0.9294 | 0.227  |
| 32.25 | 1.4847 | 1.4969 | 1.4483 | 1.3417 | 0.6814 | 0.2777 | 1.2944 | 0.9388 | 0.2269 |
| 32.5  | 1.4848 | 1.4964 | 1.448  | 1.3418 | 0.6903 | 0.2796 | 1.3014 | 0.9472 | 0.2295 |
| 32.75 | 1.4858 | 1.4974 | 1.448  | 1.3419 | 0.6979 | 0.2796 | 1.3084 | 0.9547 | 0.2294 |
| 33    | 1.4867 | 1.4992 | 1.4467 | 1.3432 | 0.7055 | 0.2801 | 1.3172 | 0.9652 | 0.2294 |
| 33.25 | 1.4876 | 1.498  | 1.4476 | 1.3424 | 0.7149 | 0.2793 | 1.3235 | 0.9736 | 0.231  |
| 33.5  | 1.4885 | 1.4993 | 1.4481 | 1.3446 | 0.7238 | 0.2792 | 1.3307 | 0.9819 | 0.2311 |
| 33.75 | 1.4883 | 1.4994 | 1.4469 | 1.3429 | 0.7283 | 0.2821 | 1.3348 | 0.9911 | 0.233  |
| 34    | 1.4888 | 1.4988 | 1.4474 | 1.3437 | 0.736  | 0.2821 | 1.343  | 0.9999 | 0.2324 |
| 34.25 | 1.4892 | 1.4995 | 1.4471 | 1.3437 | 0.7425 | 0.2815 | 1.349  | 1.0092 | 0.2349 |
| 34.5  | 1.4899 | 1.4996 | 1.4474 | 1.3446 | 0.7508 | 0.2833 | 1.3546 | 1.0176 | 0.2359 |
| 34.75 | 1.4919 | 1.5003 | 1.4472 | 1.3441 | 0.7587 | 0.2828 | 1.3618 | 1.0266 | 0.2366 |
| 35    | 1.492  | 1.5014 | 1.4486 | 1.3444 | 0.7682 | 0.2838 | 1.3662 | 1.0347 | 0.2377 |
| 35.25 | 1.4922 | 1.502  | 1.4486 | 1.3451 | 0.7761 | 0.2842 | 1.3723 | 1.0438 | 0.2373 |
| 35.5  | 1.4933 | 1.5004 | 1.4477 | 1.3466 | 0.7849 | 0.286  | 1.3774 | 1.0523 | 0.2369 |
| 35.75 | 1.4939 | 1.5019 | 1.4479 | 1.3474 | 0.7934 | 0.2852 | 1.3823 | 1.0611 | 0.2378 |
| 36    | 1.4951 | 1.5018 | 1.4476 | 1.3463 | 0.8023 | 0.2861 | 1.3837 | 1.0704 | 0.2377 |
| 36.25 | 1.4965 | 1.5015 | 1.4469 | 1.3471 | 0.8096 | 0.2874 | 1.3861 | 1.0786 | 0.2392 |
| 36.5  | 1.4976 | 1.5021 | 1.4473 | 1.3472 | 0.8181 | 0.2862 | 1.3899 | 1.0879 | 0.2384 |
| 36.75 | 1.4983 | 1.5037 | 1.4481 | 1.3466 | 0.8262 | 0.2877 | 1.3884 | 1.0957 | 0.2411 |
| 37    | 1.4992 | 1.5034 | 1.4477 | 1.3491 | 0.8359 | 0.286  | 1.3924 | 1.1021 | 0.2417 |
| 37.25 | 1.4997 | 1.504  | 1.449  | 1.3478 | 0.8464 | 0.2875 | 1.392  | 1.111  | 0.2435 |
| 37.5  | 1.5011 | 1.5037 | 1.4489 | 1.3484 | 0.8519 | 0.2886 | 1.394  | 1.1192 | 0.2451 |
| 37.75 | 1.502  | 1.505  | 1.4486 | 1.3486 | 0.8622 | 0.2882 | 1.3945 | 1.1272 | 0.2454 |
| 38    | 1.5029 | 1.5047 | 1.4475 | 1.3482 | 0.8719 | 0.2879 | 1.3948 | 1.1351 | 0.2468 |
| 38.25 | 1.5029 | 1.5046 | 1.449  | 1.3481 | 0.8797 | 0.2884 | 1.3948 | 1.1435 | 0.248  |
| 38.5  | 1.504  | 1.505  | 1.4481 | 1.3475 | 0.8901 | 0.2899 | 1.3951 | 1.1519 | 0.2491 |
| 38.75 | 1.5035 | 1.5042 | 1.448  | 1.348  | 0.8968 | 0.288  | 1.3948 | 1.1602 | 0.2485 |
| 39    | 1.5042 | 1.505  | 1.4488 | 1.348  | 0.9076 | 0.2888 | 1.3941 | 1.1698 | 0.2511 |
| 39.25 | 1.5058 | 1.5049 | 1.4482 | 1.3487 | 0.9172 | 0.2889 | 1.3937 | 1.1767 | 0.2502 |

|       |        |        |        |        |        |        |        |        |        |
|-------|--------|--------|--------|--------|--------|--------|--------|--------|--------|
| 39.5  | 1.507  | 1.5052 | 1.4485 | 1.3482 | 0.9235 | 0.2888 | 1.3938 | 1.1865 | 0.2507 |
| 39.75 | 1.5073 | 1.506  | 1.4484 | 1.3481 | 0.9313 | 0.2898 | 1.3934 | 1.1936 | 0.2532 |
| 40    | 1.5077 | 1.5062 | 1.4489 | 1.3482 | 0.9394 | 0.2905 | 1.3938 | 1.2028 | 0.2535 |
| 40.25 | 1.5093 | 1.5063 | 1.4496 | 1.3482 | 0.9505 | 0.2904 | 1.3937 | 1.21   | 0.2532 |
| 40.5  | 1.5096 | 1.506  | 1.4489 | 1.3468 | 0.957  | 0.2923 | 1.3947 | 1.2185 | 0.2549 |
| 40.75 | 1.5108 | 1.5059 | 1.4494 | 1.3483 | 0.9659 | 0.2923 | 1.3949 | 1.2272 | 0.2566 |
| 41    | 1.5129 | 1.5053 | 1.4485 | 1.348  | 0.9744 | 0.2924 | 1.3935 | 1.2333 | 0.2578 |
| 41.25 | 1.5127 | 1.5048 | 1.4491 | 1.3481 | 0.9857 | 0.2926 | 1.3955 | 1.2421 | 0.2582 |
| 41.5  | 1.513  | 1.5052 | 1.4495 | 1.348  | 0.9932 | 0.2935 | 1.395  | 1.2493 | 0.2606 |
| 41.75 | 1.513  | 1.5045 | 1.4496 | 1.3471 | 1.0018 | 0.2929 | 1.3952 | 1.2552 | 0.2603 |
| 42    | 1.5143 | 1.506  | 1.4492 | 1.3485 | 1.0104 | 0.2945 | 1.395  | 1.2618 | 0.2607 |
| 42.25 | 1.5164 | 1.506  | 1.4512 | 1.3495 | 1.019  | 0.2949 | 1.3979 | 1.2685 | 0.2608 |
| 42.5  | 1.5166 | 1.5062 | 1.4516 | 1.3495 | 1.0273 | 0.2948 | 1.3951 | 1.2763 | 0.2615 |
| 42.75 | 1.518  | 1.506  | 1.4518 | 1.3499 | 1.0344 | 0.2963 | 1.3965 | 1.2821 | 0.2633 |
| 43    | 1.5154 | 1.5053 | 1.4522 | 1.3498 | 1.0476 | 0.296  | 1.3965 | 1.2887 | 0.2636 |
| 43.25 | 1.5129 | 1.5059 | 1.4522 | 1.3485 | 1.0561 | 0.2983 | 1.3961 | 1.2954 | 0.2656 |
| 43.5  | 1.5111 | 1.5064 | 1.4527 | 1.3496 | 1.0594 | 0.2975 | 1.3972 | 1.3006 | 0.2666 |
| 43.75 | 1.5114 | 1.5084 | 1.453  | 1.3493 | 1.0702 | 0.2986 | 1.3971 | 1.307  | 0.2666 |
| 44    | 1.5125 | 1.5078 | 1.4529 | 1.3509 | 1.0785 | 0.2992 | 1.3991 | 1.3118 | 0.2679 |
| 44.25 | 1.5102 | 1.5073 | 1.4529 | 1.3495 | 1.0865 | 0.2998 | 1.3968 | 1.3189 | 0.2689 |
| 44.5  | 1.5105 | 1.5065 | 1.4523 | 1.349  | 1.0927 | 0.3001 | 1.3976 | 1.3234 | 0.2702 |
| 44.75 | 1.5104 | 1.5065 | 1.454  | 1.3484 | 1.1045 | 0.3003 | 1.3989 | 1.3277 | 0.2711 |
| 45    | 1.5092 | 1.5064 | 1.4543 | 1.3491 | 1.1093 | 0.3004 | 1.3976 | 1.3329 | 0.2736 |
| 45.25 | 1.5105 | 1.5057 | 1.4541 | 1.347  | 1.118  | 0.3022 | 1.3997 | 1.339  | 0.2737 |
| 45.5  | 1.5103 | 1.5065 | 1.4557 | 1.3494 | 1.1231 | 0.3029 | 1.4004 | 1.3444 | 0.2768 |
| 45.75 | 1.51   | 1.5067 | 1.4559 | 1.3471 | 1.1318 | 0.3041 | 1.4002 | 1.3488 | 0.2763 |
| 46    | 1.5108 | 1.5061 | 1.4561 | 1.3484 | 1.1386 | 0.305  | 1.3998 | 1.3526 | 0.2781 |
| 46.25 | 1.5109 | 1.5064 | 1.456  | 1.3495 | 1.1465 | 0.3062 | 1.4014 | 1.3577 | 0.2802 |
| 46.5  | 1.511  | 1.5069 | 1.4571 | 1.3489 | 1.1539 | 0.3057 | 1.4031 | 1.3625 | 0.2816 |
| 46.75 | 1.511  | 1.5052 | 1.4577 | 1.3474 | 1.1619 | 0.3059 | 1.4031 | 1.3663 | 0.2832 |
| 47    | 1.5111 | 1.5059 | 1.4574 | 1.3488 | 1.1665 | 0.3079 | 1.4015 | 1.3704 | 0.2857 |
| 47.25 | 1.5102 | 1.5042 | 1.4571 | 1.3478 | 1.1716 | 0.3089 | 1.4039 | 1.3756 | 0.2876 |
| 47.5  | 1.5112 | 1.5044 | 1.4583 | 1.349  | 1.1757 | 0.3106 | 1.403  | 1.3808 | 0.2896 |
| 47.75 | 1.5109 | 1.5036 | 1.4575 | 1.347  | 1.1816 | 0.3096 | 1.4039 | 1.3843 | 0.2922 |
| 48    | 1.511  | 1.5046 | 1.4582 | 1.3472 | 1.1874 | 0.3119 | 1.404  | 1.3882 | 0.2948 |
| 48.25 | 1.511  | 1.5042 | 1.4587 | 1.3463 | 1.1929 | 0.3122 | 1.4048 | 1.3926 | 0.2965 |
| 48.5  | 1.5111 | 1.504  | 1.4592 | 1.348  | 1.1938 | 0.314  | 1.4056 | 1.3961 | 0.2985 |
| 48.75 | 1.5107 | 1.5019 | 1.4578 | 1.3478 | 1.1992 | 0.3133 | 1.4043 | 1.3987 | 0.3005 |
| 49    | 1.5112 | 1.5026 | 1.4586 | 1.3477 | 1.2005 | 0.3155 | 1.4055 | 1.4024 | 0.3035 |
| 49.25 | 1.5109 | 1.5034 | 1.4604 | 1.3472 | 1.2012 | 0.3167 | 1.4059 | 1.4045 | 0.3046 |
| 49.5  | 1.5094 | 1.504  | 1.4603 | 1.3468 | 1.2047 | 0.3183 | 1.4052 | 1.4067 | 0.3067 |
| 49.75 | 1.5105 | 1.5038 | 1.4602 | 1.3479 | 1.2058 | 0.3189 | 1.4074 | 1.409  | 0.3091 |

|     | <b>K15</b>    | <b>K16</b>    |
|-----|---------------|---------------|
|     | <b>RAD 10</b> | <b>RAD 30</b> |
|     | 0.1445        | 0.1568        |
|     | 0.1351        | 0.148         |
|     | 0.1321        | 0.1455        |
|     | 0.1307        | 0.1437        |
|     | 0.1302        | 0.1436        |
|     | 302           | 0.1432        |
|     | 305           | 0.1442        |
|     | 307           | 0.144         |
|     | 304           | 0.1439        |
|     | 306           | 0.1441        |
|     | 315           | 0.1428        |
|     | 312           | 0.1443        |
|     | 316           | 0.144         |
|     | 319           | 0.1437        |
|     | 132           | 0.1455        |
| 3)  | 323           | 0.1454        |
| 3)  | 329           | 0.1457        |
| JG  | 327           | 0.1466        |
| I   | 332           | 0.147         |
| I   | 335           | 0.1475        |
| 100 | 338           | 0.1472        |
| 250 | 134           | 0.1481        |
|     | 346           | 0.1488        |
|     | 346           | 0.1489        |
|     | 362           | 0.1498        |
|     | 358           | 0.1503        |
|     | 367           | 0.1519        |
|     | 376           | 0.1527        |
|     | 373           | 0.1536        |
|     | 138           | 0.154         |
|     | 382           | 0.1557        |
|     | 398           | 0.1552        |



|        |        |
|--------|--------|
| 397    | 0.1552 |
| 403    | 0.156  |
| 411    | 0.1572 |
| 405    | 0.1567 |
| 406    | 0.1576 |
| 423    | 0.1586 |
| 0.419  | 0.159  |
| 0.1422 | 0.1598 |
| 0.1428 | 0.1603 |
| 0.1436 | 0.1604 |
| 0.1429 | 0.1618 |
| 0.144  | 0.162  |
| 0.1453 | 0.1628 |
| 0.1452 | 0.1632 |
| 0.1459 | 0.1643 |
| 0.146  | 0.1645 |
| 0.1463 | 0.1654 |
| 0.1476 | 0.1678 |
| 0.148  | 0.172  |
| 0.1483 | 0.1711 |
| 0.1488 | 0.1712 |
| 0.1499 | 0.1725 |
| 0.1501 | 0.1733 |
| 0.1503 | 0.173  |
| 0.1508 | 0.174  |
| 0.1513 | 0.1761 |
| 0.1523 | 0.1766 |
| 0.1529 | 0.1766 |
| 0.1532 | 0.1782 |
| 0.1532 | 0.1779 |
| 0.1526 | 0.1788 |
| 0.1533 | 0.1757 |
| 0.1537 | 0.1717 |
| 0.1553 | 0.1719 |
| 0.156  | 0.173  |
| 0.1575 | 0.1728 |
| 0.1598 | 0.1753 |
| 0.1611 | 0.1748 |
| 0.1624 | 0.1767 |
| 0.1576 | 0.1762 |
| 0.1566 | 0.1774 |
| 0.1582 | 0.1766 |

|        |        |
|--------|--------|
| 0.1582 | 0.1767 |
| 0.159  | 0.1772 |
| 0.1591 | 0.1772 |
| 0.1596 | 0.1773 |
| 0.1591 | 0.1775 |
| 0.1599 | 0.1775 |
| 0.16   | 0.178  |
| 0.1608 | 0.1789 |
| 0.1608 | 0.1793 |
| 0.1606 | 0.1791 |
| 0.1617 | 0.1799 |
| 0.161  | 0.1802 |
| 0.162  | 0.1791 |
| 0.1614 | 0.1816 |
| 0.1618 | 0.1798 |
| 0.1623 | 0.1812 |
| 0.1626 | 0.1812 |
| 0.1627 | 0.1815 |
| 0.1647 | 0.1826 |
| 0.1631 | 0.1826 |
| 0.1642 | 0.1829 |
| 0.1636 | 0.1837 |
| 0.164  | 0.1827 |
| 0.1641 | 0.1838 |
| 0.1651 | 0.1833 |
| 0.1657 | 0.1836 |
| 0.1656 | 0.1832 |
| 0.1657 | 0.1837 |
| 0.1665 | 0.1832 |
| 0.1664 | 0.1835 |
| 0.1667 | 0.1823 |
| 0.1661 | 0.1827 |
| 0.1647 | 0.1829 |
| 0.1646 | 0.1832 |
| 0.1646 | 0.1837 |
| 0.1653 | 0.1837 |
| 0.1645 | 0.1842 |
| 0.1651 | 0.1849 |
| 0.165  | 0.1839 |
| 0.1652 | 0.1838 |
| 0.165  | 0.1845 |
| 0.1655 | 0.1851 |

|        |        |
|--------|--------|
| 0.1661 | 0.1846 |
| 0.1657 | 0.1855 |
| 0.1664 | 0.1869 |
| 0.1665 | 0.1855 |
| 0.1665 | 0.1856 |
| 0.1671 | 0.1869 |
| 0.1668 | 0.1854 |
| 0.1654 | 0.185  |
| 0.1667 | 0.1854 |
| 0.1677 | 0.1861 |
| 0.1667 | 0.1864 |
| 0.1671 | 0.1857 |
| 0.1667 | 0.1862 |
| 0.1674 | 0.1859 |
| 0.1667 | 0.1858 |
| 0.1655 | 0.187  |
| 0.167  | 0.186  |
| 0.1662 | 0.1854 |
| 0.1673 | 0.1848 |
| 0.1666 | 0.1852 |
| 0.1669 | 0.1863 |
| 0.1665 | 0.1858 |
| 0.1677 | 0.1859 |
| 0.167  | 0.1858 |
| 0.1677 | 0.1863 |
| 0.1673 | 0.1869 |
| 0.1681 | 0.1873 |
| 0.1674 | 0.1868 |
| 0.1679 | 0.1852 |
| 0.1675 | 0.1872 |
| 0.1673 | 0.1854 |
| 0.1681 | 0.1871 |
| 0.168  | 0.1854 |
| 0.1665 | 0.1862 |
| 0.1668 | 0.186  |
| 0.1675 | 0.1846 |
| 0.1665 | 0.1855 |
| 0.1672 | 0.1848 |
| 0.167  | 0.185  |
| 0.1665 | 0.1838 |
| 0.1676 | 0.1867 |
| 0.1669 | 0.1847 |

|        |        |
|--------|--------|
| 0.1667 | 0.1849 |
| 0.1675 | 0.1851 |
| 0.1671 | 0.1842 |
| 0.1664 | 0.1852 |
| 0.1674 | 0.1856 |
| 0.1676 | 0.1855 |
| 0.1673 | 0.186  |
| 0.1673 | 0.1855 |
| 0.1675 | 0.1854 |
| 0.1671 | 0.1849 |
| 0.1675 | 0.1853 |
| 0.1679 | 0.1834 |
| 0.1682 | 0.1834 |
| 0.1675 | 0.1846 |
| 0.1682 | 0.1836 |
| 0.1676 | 0.1841 |
| 0.1668 | 0.1837 |
| 0.1682 | 0.1837 |
| 0.1685 | 0.1834 |
| 0.1666 | 0.1838 |
| 0.1678 | 0.1828 |
| 0.1678 | 0.183  |
| 0.1675 | 0.1827 |
| 0.168  | 0.1822 |
| 0.1692 | 0.1831 |
| 0.1676 | 0.1829 |
| 0.1679 | 0.1833 |
| 0.1683 | 0.1833 |
| 0.1678 | 0.1819 |
| 0.167  | 0.1824 |
| 0.1674 | 0.1842 |
| 0.1676 | 0.1847 |
| 0.1668 | 0.1848 |
| 0.1668 | 0.1834 |
| 0.1675 | 0.1822 |
| 0.1674 | 0.1841 |
| 0.1673 | 0.1843 |
| 0.1669 | 0.1837 |
| 0.1675 | 0.1833 |
| 0.1668 | 0.1833 |
| 0.1667 | 0.1837 |
| 0.1686 | 0.1823 |

HSP82

|      | C1     |          | C2        |         | C3     |        | C4       |          | C5       |        | C6     |  |
|------|--------|----------|-----------|---------|--------|--------|----------|----------|----------|--------|--------|--|
| TIME | WT     | WT(GA 3) | WT(RAD 3) | NO DRUG | GA 3uM | GA 7uM | NOVO 100 | NOVO 250 | NOVO 250 | RAD 3  | RAD 3  |  |
| 0    | 0.1894 | 0.2051   | 0.1892    | 0.1648  | 0.1663 | 0.1606 | 0.2055   | 0.2552   | 0.2552   | 0.1765 | 0.1765 |  |
| 0.25 | 0.1844 | 0.1929   | 0.1812    | 0.1572  | 0.1548 | 0.1497 | 0.2105   | 0.256    | 0.256    | 0.1581 | 0.1581 |  |
| 0.5  | 0.1833 | 0.1912   | 0.1787    | 0.1554  | 0.1535 | 0.1474 | 0.211    | 0.2579   | 0.2579   | 0.1548 | 0.1548 |  |
| 0.75 | 0.1838 | 0.189    | 0.1758    | 0.1533  | 0.1535 | 0.1464 | 0.2065   | 0.2578   | 0.2578   | 0.1526 | 0.1526 |  |
| 1    | 0.1843 | 0.1877   | 0.1818    | 0.1518  | 0.1516 | 0.1452 | 0.2054   | 0.2593   | 0.2593   | 0.1512 | 0.1512 |  |
| 1.25 | 0.1867 | 0.1862   | 0.1836    | 0.1526  | 0.1527 | 0.1454 | 0.2075   | 0.2583   | 0.2583   | 0.1518 | 0.1518 |  |

HSP82

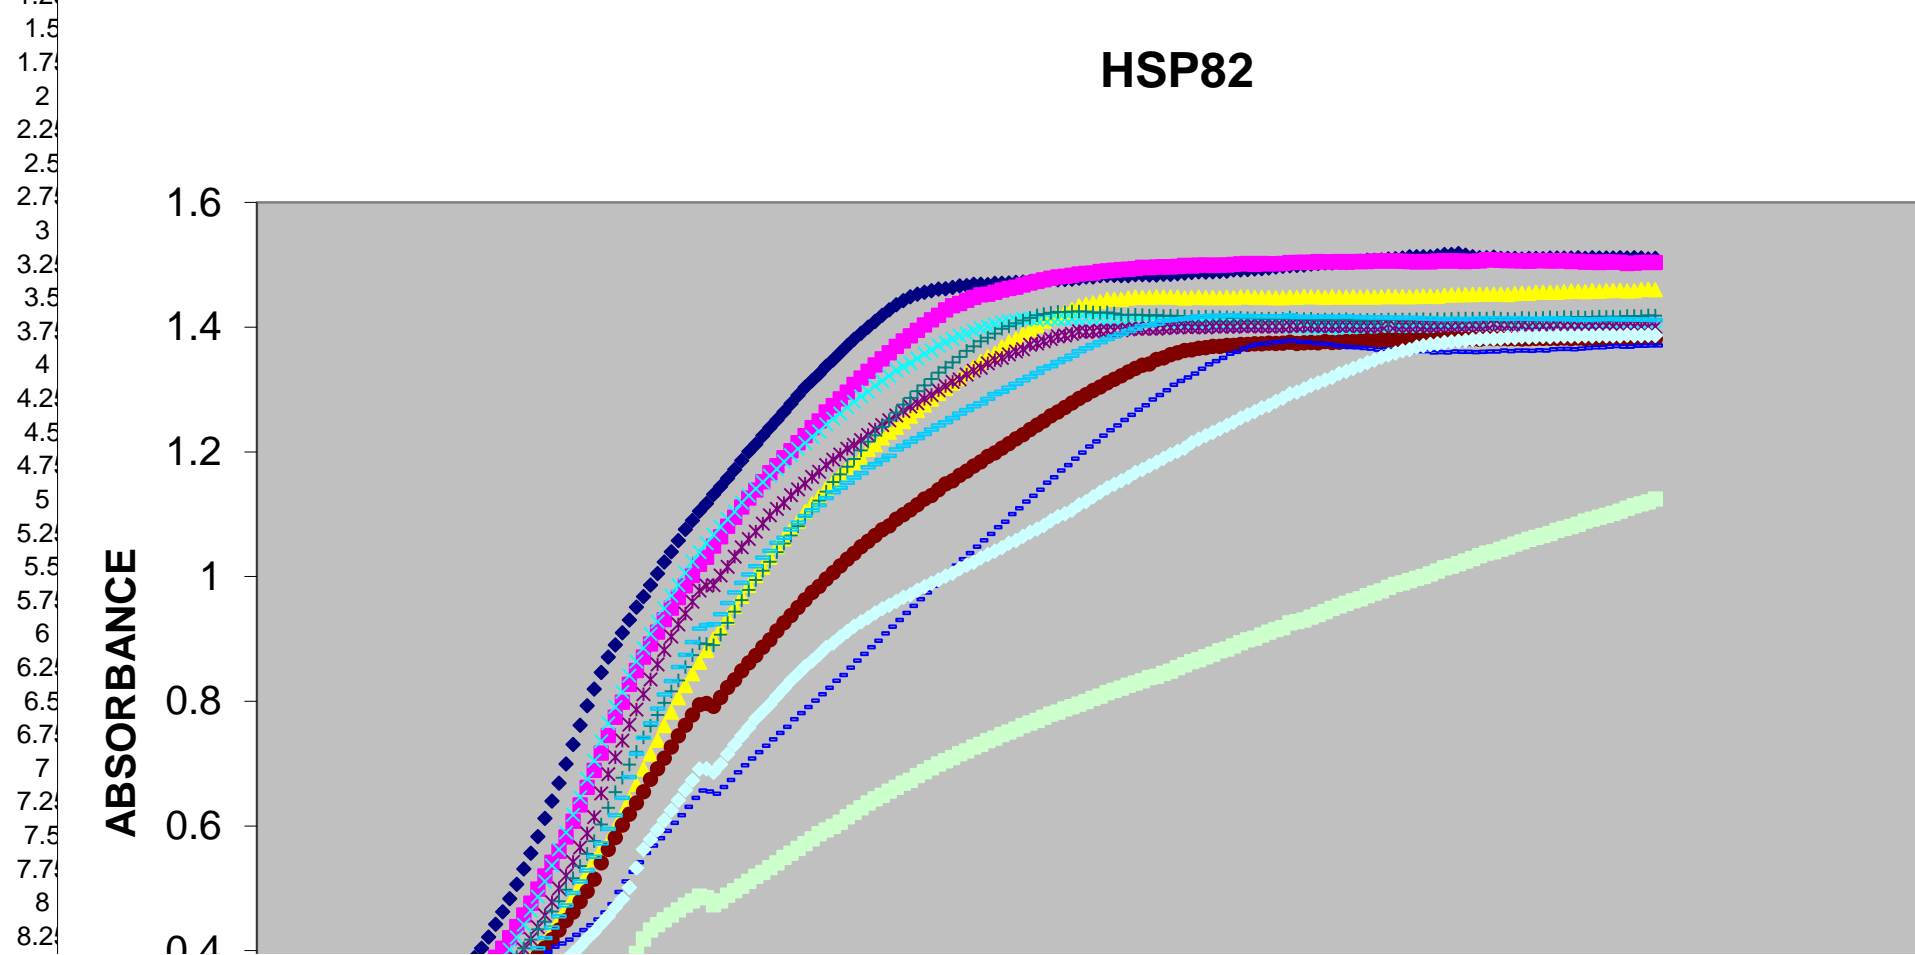

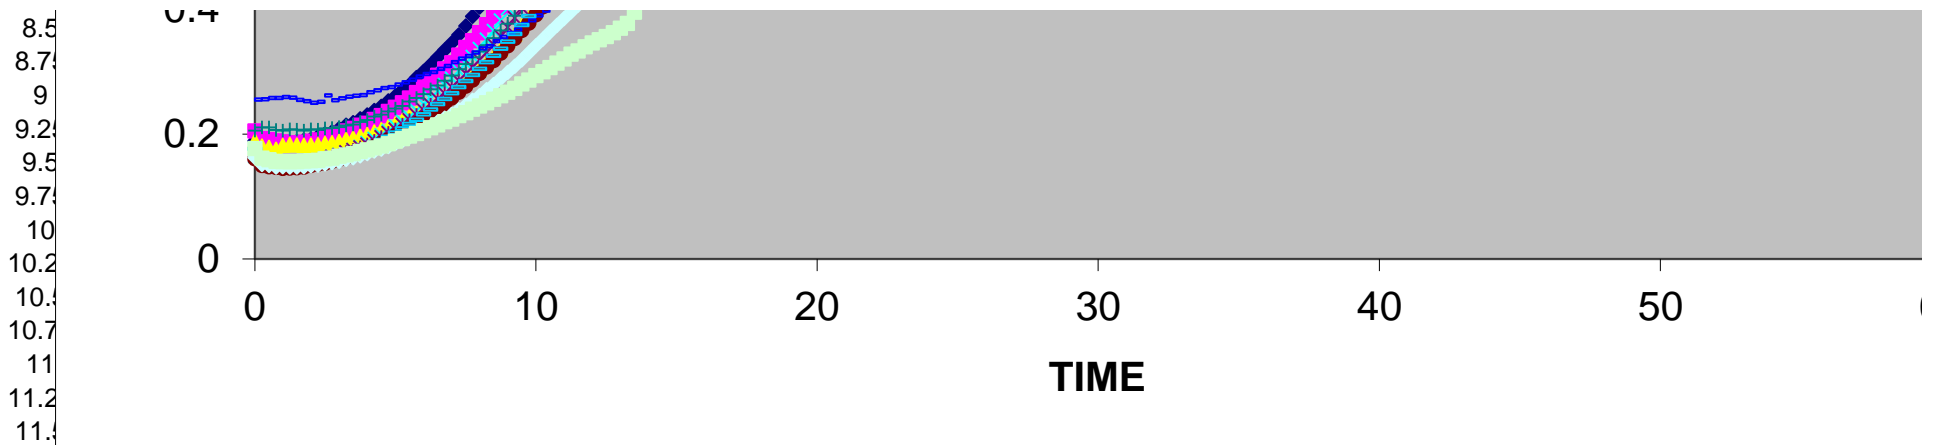

|       |        |        |        |        |        |        |        |        |        |
|-------|--------|--------|--------|--------|--------|--------|--------|--------|--------|
| 11.75 | 0.7927 | 0.6618 | 0.5242 | 0.6753 | 0.588  | 0.4949 | 0.5552 | 0.4405 | 0.5286 |
| 12    | 0.8194 | 0.6889 | 0.5464 | 0.7045 | 0.6141 | 0.5144 | 0.5756 | 0.4499 | 0.5505 |
| 12.25 | 0.8459 | 0.7168 | 0.5622 | 0.7356 | 0.652  | 0.5408 | 0.6025 | 0.4614 | 0.5719 |
| 12.5  | 0.8706 | 0.7448 | 0.5743 | 0.7645 | 0.6829 | 0.5623 | 0.6288 | 0.4746 | 0.595  |
| 12.75 | 0.8904 | 0.7744 | 0.5968 | 0.7909 | 0.7103 | 0.5815 | 0.6543 | 0.4938 | 0.6174 |
| 13    | 0.9099 | 0.7982 | 0.6186 | 0.8147 | 0.7368 | 0.6012 | 0.6774 | 0.5108 | 0.6447 |
| 13.25 | 0.9301 | 0.8269 | 0.6426 | 0.841  | 0.7626 | 0.619  | 0.6984 | 0.5263 | 0.6785 |
| 13.5  | 0.9508 | 0.849  | 0.6665 | 0.8637 | 0.7866 | 0.6365 | 0.7191 | 0.5416 | 0.7158 |
| 13.75 | 0.9679 | 0.8707 | 0.6913 | 0.8852 | 0.811  | 0.6548 | 0.7422 | 0.5567 | 0.7416 |
| 14    | 0.986  | 0.8918 | 0.7152 | 0.9079 | 0.8346 | 0.6745 | 0.7604 | 0.5684 | 0.7645 |
| 14.25 | 1.0047 | 0.9106 | 0.7372 | 0.9279 | 0.859  | 0.6917 | 0.7779 | 0.5803 | 0.7882 |
| 14.5  | 1.0233 | 0.9308 | 0.7608 | 0.9489 | 0.8821 | 0.7086 | 0.7974 | 0.592  | 0.8106 |
| 14.75 | 1.0397 | 0.9491 | 0.7825 | 0.9691 | 0.9036 | 0.7263 | 0.8161 | 0.6051 | 0.8322 |
| 15    | 1.0577 | 0.966  | 0.8057 | 0.9861 | 0.923  | 0.7446 | 0.8335 | 0.6171 | 0.8551 |
| 15.25 | 1.0753 | 0.9853 | 0.8251 | 1.0058 | 0.9408 | 0.7614 | 0.8548 | 0.6305 | 0.8746 |
| 15.5  | 1.0897 | 1.0015 | 0.8439 | 1.0237 | 0.9598 | 0.7779 | 0.8738 | 0.6448 | 0.8947 |
| 15.75 | 1.1049 | 1.0198 | 0.8628 | 1.0393 | 0.9774 | 0.7944 | 0.8928 | 0.6565 | 0.9164 |
| 16    | 1.1171 | 1.031  | 0.8817 | 1.0537 | 0.9853 | 0.7966 | 0.8918 | 0.6552 | 0.9219 |
| 16.25 | 1.1316 | 1.0487 | 0.8996 | 1.0668 | 0.9864 | 0.7915 | 0.8899 | 0.6517 | 0.9235 |
| 16.5  | 1.1443 | 1.0637 | 0.9165 | 1.0798 | 1.0014 | 0.8059 | 0.9066 | 0.6624 | 0.9393 |
| 16.75 | 1.1579 | 1.0806 | 0.9342 | 1.0922 | 1.0154 | 0.8219 | 0.9255 | 0.6739 | 0.9573 |
| 17    | 1.1715 | 1.0952 | 0.9517 | 1.1037 | 1.0318 | 0.8341 | 0.9438 | 0.6861 | 0.9746 |
| 17.25 | 1.1858 | 1.1114 | 0.9682 | 1.1187 | 1.047  | 0.8487 | 0.9619 | 0.6971 | 0.9897 |
| 17.5  | 1.2004 | 1.1256 | 0.9855 | 1.1299 | 1.0602 | 0.8615 | 0.9785 | 0.708  | 1.0034 |
| 17.75 | 1.2123 | 1.1388 | 1.0016 | 1.1409 | 1.0718 | 0.8733 | 0.9947 | 0.7181 | 1.0164 |
| 18    | 1.2261 | 1.1522 | 1.015  | 1.1513 | 1.0847 | 0.8866 | 1.0091 | 0.7288 | 1.0305 |
| 18.25 | 1.239  | 1.1664 | 1.0307 | 1.1619 | 1.0983 | 0.8984 | 1.0238 | 0.739  | 1.041  |
| 18.5  | 1.251  | 1.1779 | 1.0478 | 1.172  | 1.1086 | 0.9131 | 1.0391 | 0.7491 | 1.0539 |
| 18.75 | 1.2641 | 1.1907 | 1.0607 | 1.1842 | 1.1177 | 0.9256 | 1.0529 | 0.759  | 1.0621 |

|       |        |        |        |        |        |        |        |        |        |
|-------|--------|--------|--------|--------|--------|--------|--------|--------|--------|
| 19    | 1.2773 | 1.2018 | 1.0765 | 1.1948 | 1.1304 | 0.9374 | 1.0659 | 0.771  | 1.0754 |
| 19.25 | 1.2907 | 1.2145 | 1.0891 | 1.2049 | 1.1397 | 0.9501 | 1.0805 | 0.7812 | 1.0861 |
| 19.5  | 1.3032 | 1.2259 | 1.1041 | 1.2141 | 1.1488 | 0.9626 | 1.0956 | 0.7907 | 1.0969 |
| 19.75 | 1.3141 | 1.239  | 1.1166 | 1.2244 | 1.1598 | 0.9746 | 1.1082 | 0.8008 | 1.1062 |
| 20    | 1.3251 | 1.2497 | 1.1283 | 1.2324 | 1.1681 | 0.9843 | 1.1216 | 0.8111 | 1.1148 |
| 20.25 | 1.3374 | 1.2637 | 1.1419 | 1.244  | 1.1785 | 0.9962 | 1.136  | 0.8214 | 1.1261 |
| 20.5  | 1.3474 | 1.2743 | 1.1521 | 1.2533 | 1.1872 | 1.0061 | 1.1516 | 0.8327 | 1.1349 |
| 20.75 | 1.3589 | 1.2848 | 1.1637 | 1.2612 | 1.1957 | 1.017  | 1.164  | 0.8419 | 1.1421 |
| 21    | 1.3704 | 1.2956 | 1.1744 | 1.2717 | 1.2051 | 1.0279 | 1.1763 | 0.8537 | 1.1506 |
| 21.25 | 1.3806 | 1.3083 | 1.1829 | 1.2802 | 1.2112 | 1.037  | 1.1886 | 0.8649 | 1.1586 |
| 21.5  | 1.39   | 1.3184 | 1.1906 | 1.2889 | 1.2188 | 1.0477 | 1.2022 | 0.8757 | 1.1657 |
| 21.75 | 1.3999 | 1.3289 | 1.2037 | 1.296  | 1.2272 | 1.0567 | 1.2162 | 0.8866 | 1.1753 |
| 22    | 1.4093 | 1.3395 | 1.2116 | 1.3062 | 1.2357 | 1.0656 | 1.2263 | 0.8969 | 1.1802 |
| 22.25 | 1.4189 | 1.3493 | 1.2223 | 1.3136 | 1.2429 | 1.0752 | 1.2398 | 0.9088 | 1.1869 |
| 22.5  | 1.4278 | 1.3589 | 1.2316 | 1.322  | 1.2506 | 1.0814 | 1.2505 | 0.9193 | 1.1936 |
| 22.75 | 1.4356 | 1.369  | 1.2391 | 1.3307 | 1.2582 | 1.092  | 1.2628 | 0.9303 | 1.2037 |
| 23    | 1.4425 | 1.3781 | 1.2485 | 1.3364 | 1.2652 | 1.0991 | 1.2755 | 0.9416 | 1.2094 |
| 23.25 | 1.4488 | 1.3861 | 1.257  | 1.3425 | 1.2728 | 1.1071 | 1.2866 | 0.953  | 1.2162 |
| 23.5  | 1.4527 | 1.3947 | 1.2667 | 1.3497 | 1.2776 | 1.1149 | 1.2971 | 0.9635 | 1.2216 |
| 23.75 | 1.4559 | 1.4037 | 1.2752 | 1.3574 | 1.285  | 1.1243 | 1.3067 | 0.9747 | 1.2286 |
| 24    | 1.4583 | 1.4119 | 1.2845 | 1.3628 | 1.2913 | 1.1302 | 1.3167 | 0.985  | 1.2357 |
| 24.25 | 1.4609 | 1.4188 | 1.2937 | 1.3708 | 1.2986 | 1.1391 | 1.3268 | 0.996  | 1.2423 |
| 24.5  | 1.4615 | 1.4276 | 1.3014 | 1.3758 | 1.3055 | 1.1485 | 1.3354 | 1.0063 | 1.2474 |
| 24.75 | 1.4635 | 1.4341 | 1.3101 | 1.3811 | 1.312  | 1.1537 | 1.3434 | 1.0178 | 1.254  |
| 25    | 1.466  | 1.4379 | 1.3177 | 1.3862 | 1.3164 | 1.1622 | 1.352  | 1.028  | 1.2616 |
| 25.25 | 1.4669 | 1.4431 | 1.3269 | 1.3896 | 1.3239 | 1.1692 | 1.3618 | 1.0377 | 1.2668 |
| 25.5  | 1.4687 | 1.4476 | 1.3358 | 1.3943 | 1.3302 | 1.1771 | 1.3693 | 1.0478 | 1.273  |
| 25.75 | 1.4687 | 1.4518 | 1.345  | 1.3986 | 1.3347 | 1.1837 | 1.3771 | 1.0582 | 1.2778 |
| 26    | 1.4682 | 1.453  | 1.3526 | 1.401  | 1.3417 | 1.1927 | 1.383  | 1.0686 | 1.2852 |
| 26.25 | 1.4704 | 1.4557 | 1.3577 | 1.4043 | 1.3472 | 1.1983 | 1.3898 | 1.0794 | 1.2926 |
| 26.5  | 1.4702 | 1.4595 | 1.368  | 1.4074 | 1.3504 | 1.2061 | 1.3971 | 1.0881 | 1.2963 |
| 26.75 | 1.4706 | 1.4619 | 1.3756 | 1.4094 | 1.3564 | 1.213  | 1.4017 | 1.1002 | 1.3031 |
| 27    | 1.4716 | 1.4639 | 1.3808 | 1.4107 | 1.361  | 1.221  | 1.4061 | 1.1095 | 1.3093 |
| 27.25 | 1.4725 | 1.4677 | 1.3894 | 1.4133 | 1.3645 | 1.2274 | 1.4107 | 1.1204 | 1.3149 |
| 27.5  | 1.473  | 1.4709 | 1.396  | 1.4141 | 1.3717 | 1.2358 | 1.4147 | 1.1296 | 1.3204 |
| 27.75 | 1.4747 | 1.4735 | 1.4025 | 1.4119 | 1.3739 | 1.2428 | 1.4191 | 1.1392 | 1.3263 |
| 28    | 1.4747 | 1.4758 | 1.4095 | 1.4139 | 1.3771 | 1.2494 | 1.4212 | 1.1506 | 1.3335 |
| 28.25 | 1.4772 | 1.4784 | 1.4156 | 1.4144 | 1.3809 | 1.2579 | 1.4232 | 1.1591 | 1.3373 |
| 28.5  | 1.4758 | 1.4806 | 1.4201 | 1.4128 | 1.3852 | 1.2638 | 1.4244 | 1.1701 | 1.3439 |
| 28.75 | 1.4763 | 1.4813 | 1.4239 | 1.4134 | 1.3867 | 1.2709 | 1.4241 | 1.1789 | 1.3487 |
| 29    | 1.4771 | 1.4829 | 1.4289 | 1.4131 | 1.3894 | 1.2784 | 1.4251 | 1.1892 | 1.3541 |
| 29.25 | 1.4786 | 1.485  | 1.4341 | 1.4128 | 1.3931 | 1.2855 | 1.4251 | 1.1986 | 1.3612 |

|       |        |        |        |        |        |        |        |        |        |
|-------|--------|--------|--------|--------|--------|--------|--------|--------|--------|
| 29.5  | 1.4803 | 1.4861 | 1.4367 | 1.4135 | 1.392  | 1.2918 | 1.4251 | 1.2086 | 1.3663 |
| 29.75 | 1.4807 | 1.4866 | 1.4387 | 1.4133 | 1.3925 | 1.2984 | 1.4233 | 1.2165 | 1.3713 |
| 30    | 1.4823 | 1.4892 | 1.4412 | 1.4127 | 1.3944 | 1.3041 | 1.4231 | 1.2258 | 1.376  |
| 30.25 | 1.4831 | 1.49   | 1.4444 | 1.4114 | 1.3946 | 1.3106 | 1.4234 | 1.2345 | 1.3807 |
| 30.5  | 1.4829 | 1.4913 | 1.4444 | 1.4112 | 1.3941 | 1.3162 | 1.4221 | 1.2423 | 1.3851 |
| 30.75 | 1.4823 | 1.4923 | 1.4446 | 1.4116 | 1.3949 | 1.3221 | 1.4198 | 1.251  | 1.3892 |
| 31    | 1.4825 | 1.4929 | 1.4466 | 1.411  | 1.3961 | 1.3281 | 1.4196 | 1.2592 | 1.3936 |
| 31.25 | 1.4843 | 1.4939 | 1.448  | 1.4097 | 1.3972 | 1.3336 | 1.4201 | 1.2674 | 1.3974 |
| 31.5  | 1.4842 | 1.496  | 1.4475 | 1.4089 | 1.3973 | 1.3386 | 1.4196 | 1.2749 | 1.4018 |
| 31.75 | 1.4837 | 1.4956 | 1.4475 | 1.4088 | 1.3978 | 1.3411 | 1.4184 | 1.2839 | 1.4028 |
| 32    | 1.4837 | 1.4964 | 1.4488 | 1.4092 | 1.3971 | 1.3479 | 1.4195 | 1.2913 | 1.4057 |
| 32.25 | 1.4847 | 1.4969 | 1.4483 | 1.4082 | 1.3985 | 1.3506 | 1.4181 | 1.2986 | 1.4101 |
| 32.5  | 1.4848 | 1.4964 | 1.448  | 1.4079 | 1.3995 | 1.3559 | 1.4183 | 1.3074 | 1.4113 |
| 32.75 | 1.4858 | 1.4974 | 1.448  | 1.4067 | 1.3993 | 1.3589 | 1.4177 | 1.3138 | 1.4128 |
| 33    | 1.4867 | 1.4992 | 1.4467 | 1.4068 | 1.4002 | 1.3623 | 1.4173 | 1.3194 | 1.4137 |
| 33.25 | 1.4876 | 1.498  | 1.4476 | 1.4066 | 1.3997 | 1.3634 | 1.4171 | 1.3257 | 1.4153 |
| 33.5  | 1.4885 | 1.4993 | 1.4481 | 1.4058 | 1.3998 | 1.3663 | 1.4162 | 1.3331 | 1.4175 |
| 33.75 | 1.4883 | 1.4994 | 1.4469 | 1.4054 | 1.3996 | 1.3672 | 1.4167 | 1.3403 | 1.417  |
| 34    | 1.4888 | 1.4988 | 1.4474 | 1.4037 | 1.4008 | 1.3691 | 1.4167 | 1.3455 | 1.4186 |
| 34.25 | 1.4892 | 1.4995 | 1.4471 | 1.4047 | 1.4012 | 1.369  | 1.4158 | 1.3505 | 1.418  |
| 34.5  | 1.4899 | 1.4996 | 1.4474 | 1.4039 | 1.4009 | 1.3707 | 1.4156 | 1.3571 | 1.419  |
| 34.75 | 1.4919 | 1.5003 | 1.4472 | 1.4036 | 1.4003 | 1.3709 | 1.4149 | 1.3606 | 1.4187 |
| 35    | 1.492  | 1.5014 | 1.4486 | 1.4034 | 1.4017 | 1.372  | 1.4147 | 1.3654 | 1.4175 |
| 35.25 | 1.4922 | 1.502  | 1.4486 | 1.4032 | 1.4016 | 1.3724 | 1.4141 | 1.3704 | 1.418  |
| 35.5  | 1.4933 | 1.5004 | 1.4477 | 1.4031 | 1.4016 | 1.3732 | 1.4145 | 1.3729 | 1.4175 |
| 35.75 | 1.4939 | 1.5019 | 1.4479 | 1.4019 | 1.401  | 1.3731 | 1.4132 | 1.374  | 1.4174 |
| 36    | 1.4951 | 1.5018 | 1.4476 | 1.4023 | 1.4011 | 1.3741 | 1.4137 | 1.3754 | 1.4172 |
| 36.25 | 1.4965 | 1.5015 | 1.4469 | 1.4023 | 1.4011 | 1.3739 | 1.4138 | 1.3765 | 1.4173 |
| 36.5  | 1.4976 | 1.5021 | 1.4473 | 1.4006 | 1.401  | 1.3745 | 1.4134 | 1.3776 | 1.4169 |
| 36.75 | 1.4983 | 1.5037 | 1.4481 | 1.4012 | 1.4027 | 1.3757 | 1.4153 | 1.3782 | 1.4188 |
| 37    | 1.4992 | 1.5034 | 1.4477 | 1.4    | 1.4015 | 1.3737 | 1.4133 | 1.3764 | 1.4161 |
| 37.25 | 1.4997 | 1.504  | 1.449  | 1.4002 | 1.4029 | 1.3748 | 1.413  | 1.3763 | 1.4166 |
| 37.5  | 1.5011 | 1.5037 | 1.4489 | 1.399  | 1.4027 | 1.3752 | 1.4132 | 1.3743 | 1.4164 |
| 37.75 | 1.502  | 1.505  | 1.4486 | 1.3981 | 1.4013 | 1.3747 | 1.4116 | 1.3735 | 1.4166 |
| 38    | 1.5029 | 1.5047 | 1.4475 | 1.3997 | 1.4021 | 1.3766 | 1.4124 | 1.3725 | 1.4167 |
| 38.25 | 1.5029 | 1.5046 | 1.449  | 1.3978 | 1.4016 | 1.3752 | 1.4123 | 1.3708 | 1.4162 |
| 38.5  | 1.504  | 1.505  | 1.4481 | 1.3967 | 1.402  | 1.3756 | 1.4121 | 1.3689 | 1.4161 |
| 38.75 | 1.5035 | 1.5042 | 1.448  | 1.3972 | 1.4018 | 1.3768 | 1.4125 | 1.3682 | 1.4167 |
| 39    | 1.5042 | 1.505  | 1.4488 | 1.3974 | 1.402  | 1.377  | 1.4116 | 1.3676 | 1.4163 |
| 39.25 | 1.5058 | 1.5049 | 1.4482 | 1.3968 | 1.4016 | 1.3771 | 1.4112 | 1.3665 | 1.416  |
| 39.5  | 1.507  | 1.5052 | 1.4485 | 1.3978 | 1.4016 | 1.3785 | 1.4116 | 1.3655 | 1.4157 |
| 39.75 | 1.5073 | 1.506  | 1.4484 | 1.3962 | 1.4013 | 1.378  | 1.4116 | 1.364  | 1.4155 |



|       |        |        |        |        |        |        |        |        |        |
|-------|--------|--------|--------|--------|--------|--------|--------|--------|--------|
| 40    | 1.5077 | 1.5062 | 1.4489 | 1.3965 | 1.4022 | 1.3794 | 1.4115 | 1.3645 | 1.4156 |
| 40.25 | 1.5093 | 1.5063 | 1.4496 | 1.395  | 1.4048 | 1.3796 | 1.4123 | 1.3642 | 1.4154 |
| 40.5  | 1.5096 | 1.506  | 1.4489 | 1.3957 | 1.4022 | 1.3793 | 1.4122 | 1.3621 | 1.4149 |
| 40.75 | 1.5108 | 1.5059 | 1.4494 | 1.3956 | 1.402  | 1.3785 | 1.412  | 1.362  | 1.4151 |
| 41    | 1.5129 | 1.5053 | 1.4485 | 1.3964 | 1.4017 | 1.3796 | 1.412  | 1.3615 | 1.4149 |
| 41.25 | 1.5127 | 1.5048 | 1.4491 | 1.3956 | 1.4025 | 1.3787 | 1.4126 | 1.3615 | 1.4148 |
| 41.5  | 1.513  | 1.5052 | 1.4495 | 1.3945 | 1.4016 | 1.3796 | 1.4126 | 1.3615 | 1.4138 |
| 41.75 | 1.513  | 1.5045 | 1.4496 | 1.3938 | 1.4008 | 1.3785 | 1.4123 | 1.3595 | 1.4143 |
| 42    | 1.5143 | 1.506  | 1.4492 | 1.3948 | 1.4015 | 1.38   | 1.4134 | 1.3597 | 1.4135 |
| 42.25 | 1.5164 | 1.506  | 1.4512 | 1.3949 | 1.4019 | 1.3802 | 1.413  | 1.3593 | 1.4129 |
| 42.5  | 1.5166 | 1.5062 | 1.4516 | 1.3934 | 1.4011 | 1.3811 | 1.4133 | 1.3609 | 1.4133 |
| 42.75 | 1.518  | 1.506  | 1.4518 | 1.3939 | 1.4019 | 1.3804 | 1.4138 | 1.3603 | 1.4134 |
| 43    | 1.5154 | 1.5053 | 1.4522 | 1.3934 | 1.4026 | 1.3804 | 1.4137 | 1.3602 | 1.413  |
| 43.25 | 1.5129 | 1.5059 | 1.4522 | 1.3936 | 1.4029 | 1.3809 | 1.4138 | 1.3597 | 1.4135 |
| 43.5  | 1.5111 | 1.5064 | 1.4527 | 1.3941 | 1.4022 | 1.3803 | 1.4136 | 1.3603 | 1.4136 |
| 43.75 | 1.5114 | 1.5084 | 1.453  | 1.393  | 1.4029 | 1.3822 | 1.4137 | 1.3609 | 1.4145 |
| 44    | 1.5125 | 1.5078 | 1.4529 | 1.3938 | 1.4049 | 1.3817 | 1.4151 | 1.3608 | 1.4139 |
| 44.25 | 1.5102 | 1.5073 | 1.4529 | 1.3929 | 1.4034 | 1.3816 | 1.4136 | 1.3622 | 1.4138 |
| 44.5  | 1.5105 | 1.5065 | 1.4523 | 1.393  | 1.4028 | 1.3813 | 1.4133 | 1.3614 | 1.4132 |
| 44.75 | 1.5104 | 1.5065 | 1.454  | 1.394  | 1.4023 | 1.3815 | 1.4127 | 1.3625 | 1.4144 |
| 45    | 1.5092 | 1.5064 | 1.4543 | 1.394  | 1.4023 | 1.3808 | 1.4148 | 1.3622 | 1.4138 |
| 45.25 | 1.5105 | 1.5057 | 1.4541 | 1.3929 | 1.4012 | 1.3815 | 1.4143 | 1.3621 | 1.4134 |
| 45.5  | 1.5103 | 1.5065 | 1.4557 | 1.3937 | 1.402  | 1.382  | 1.4144 | 1.3632 | 1.4131 |
| 45.75 | 1.51   | 1.5067 | 1.4559 | 1.3924 | 1.4021 | 1.3822 | 1.4149 | 1.3625 | 1.4128 |
| 46    | 1.5108 | 1.5061 | 1.4561 | 1.394  | 1.4023 | 1.3822 | 1.4156 | 1.3643 | 1.4143 |
| 46.25 | 1.5109 | 1.5064 | 1.456  | 1.393  | 1.403  | 1.3819 | 1.4148 | 1.3649 | 1.4129 |
| 46.5  | 1.511  | 1.5069 | 1.4571 | 1.3925 | 1.4022 | 1.3827 | 1.4162 | 1.3651 | 1.4138 |
| 46.75 | 1.511  | 1.5052 | 1.4577 | 1.3926 | 1.4024 | 1.3814 | 1.4152 | 1.3645 | 1.4122 |
| 47    | 1.5111 | 1.5059 | 1.4574 | 1.3934 | 1.4021 | 1.3823 | 1.4161 | 1.3656 | 1.4129 |
| 47.25 | 1.5102 | 1.5042 | 1.4571 | 1.3943 | 1.4011 | 1.3817 | 1.4152 | 1.3665 | 1.4119 |
| 47.5  | 1.5112 | 1.5044 | 1.4583 | 1.3936 | 1.402  | 1.3822 | 1.4162 | 1.3674 | 1.4123 |
| 47.75 | 1.5109 | 1.5036 | 1.4575 | 1.3937 | 1.4013 | 1.382  | 1.4168 | 1.3674 | 1.4128 |
| 48    | 1.511  | 1.5046 | 1.4582 | 1.3939 | 1.4021 | 1.3821 | 1.4166 | 1.3684 | 1.4126 |
| 48.25 | 1.511  | 1.5042 | 1.4587 | 1.394  | 1.4008 | 1.3828 | 1.4169 | 1.3695 | 1.4133 |
| 48.5  | 1.5111 | 1.504  | 1.4592 | 1.3943 | 1.4004 | 1.3825 | 1.4163 | 1.3684 | 1.4123 |
| 48.75 | 1.5107 | 1.5019 | 1.4578 | 1.3928 | 1.4012 | 1.3814 | 1.4179 | 1.3687 | 1.4126 |
| 49    | 1.5112 | 1.5026 | 1.4586 | 1.3929 | 1.4003 | 1.3814 | 1.4181 | 1.3703 | 1.4123 |
| 49.25 | 1.5109 | 1.5034 | 1.4604 | 1.3928 | 1.4    | 1.382  | 1.4176 | 1.3699 | 1.4122 |
| 49.5  | 1.5094 | 1.504  | 1.4603 | 1.3935 | 1.4    | 1.3824 | 1.4189 | 1.3708 | 1.4118 |
| 49.75 | 1.5105 | 1.5038 | 1.4602 | 1.3927 | 1.4003 | 1.3817 | 1.4183 | 1.3709 | 1.4112 |

C7

C8

RAD 10

RAD 30

0.1623

0.177

0.1511

0.1616

0.1496

0.1591

0.1473

0.1562

0.1478

0.1559

0.147

0.1557

- 
- ◆ WT
  - WT(GA 3)
  - ▲ WT(RAD 3)
  - × NO DRUG
  - × GA 3uM
  - GA 7uM
  - + NOVO 100
  - NOVO 250
  - RAD 3
  - ◆ RAD 10

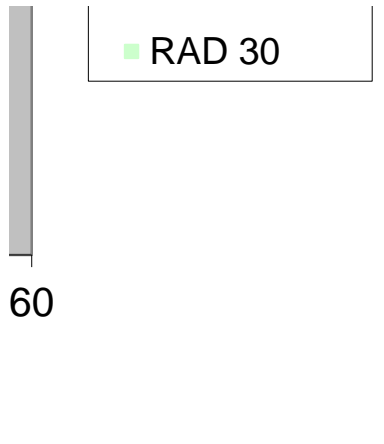

|        |        |
|--------|--------|
| 0.4192 | 0.3402 |
| 0.4301 | 0.346  |
| 0.4425 | 0.3512 |
| 0.4551 | 0.3563 |
| 0.4693 | 0.3627 |
| 0.4827 | 0.3696 |
| 0.5013 | 0.3774 |
| 0.5325 | 0.3956 |
| 0.5621 | 0.4188 |
| 0.5784 | 0.4329 |
| 0.5934 | 0.4415 |
| 0.6092 | 0.4496 |
| 0.6251 | 0.4572 |
| 0.6413 | 0.4653 |
| 0.6576 | 0.4729 |
| 0.6731 | 0.4797 |
| 0.6912 | 0.4873 |
| 0.6914 | 0.4846 |
| 0.6859 | 0.4734 |
| 0.6988 | 0.4799 |
| 0.7154 | 0.4889 |
| 0.73   | 0.496  |
| 0.7443 | 0.5032 |
| 0.7577 | 0.5111 |
| 0.7721 | 0.5193 |
| 0.7833 | 0.5253 |
| 0.795  | 0.5333 |
| 0.8081 | 0.5406 |
| 0.8203 | 0.5494 |

|        |        |
|--------|--------|
| 0.8332 | 0.5561 |
| 0.8442 | 0.5637 |
| 0.8556 | 0.5718 |
| 0.8646 | 0.5794 |
| 0.8747 | 0.5873 |
| 0.886  | 0.5935 |
| 0.8931 | 0.5995 |
| 0.9031 | 0.6059 |
| 0.9118 | 0.6145 |
| 0.9198 | 0.6217 |
| 0.927  | 0.6292 |
| 0.9338 | 0.6368 |
| 0.9414 | 0.6436 |
| 0.9482 | 0.6492 |
| 0.954  | 0.6559 |
| 0.9602 | 0.6619 |
| 0.9665 | 0.6687 |
| 0.9711 | 0.6732 |
| 0.9781 | 0.6809 |
| 0.9838 | 0.6871 |
| 0.9892 | 0.6934 |
| 0.9944 | 0.6991 |
| 1.0007 | 0.7045 |
| 1.0054 | 0.7097 |
| 1.0124 | 0.716  |
| 1.0179 | 0.7203 |
| 1.0226 | 0.7267 |
| 1.0297 | 0.7308 |
| 1.0348 | 0.7369 |
| 1.0407 | 0.741  |
| 1.0465 | 0.7466 |
| 1.0536 | 0.7507 |
| 1.0577 | 0.7554 |
| 1.0644 | 0.7609 |
| 1.0711 | 0.7649 |
| 1.0762 | 0.7694 |
| 1.0815 | 0.7742 |
| 1.0893 | 0.7792 |
| 1.096  | 0.7825 |
| 1.1009 | 0.7875 |
| 1.1064 | 0.7913 |
| 1.1152 | 0.7955 |

|        |        |
|--------|--------|
| 1.1204 | 0.7996 |
| 1.1278 | 0.8044 |
| 1.1352 | 0.8084 |
| 1.1421 | 0.8138 |
| 1.148  | 0.8173 |
| 1.1536 | 0.821  |
| 1.159  | 0.8256 |
| 1.1667 | 0.8291 |
| 1.1717 | 0.8328 |
| 1.1778 | 0.8378 |
| 1.1831 | 0.8401 |
| 1.1893 | 0.8448 |
| 1.1956 | 0.8482 |
| 1.201  | 0.8536 |
| 1.2061 | 0.8586 |
| 1.2147 | 0.8636 |
| 1.2202 | 0.8666 |
| 1.226  | 0.8712 |
| 1.2312 | 0.8754 |
| 1.2368 | 0.8808 |
| 1.2425 | 0.8838 |
| 1.2474 | 0.8886 |
| 1.2542 | 0.8939 |
| 1.2592 | 0.8984 |
| 1.2643 | 0.9013 |
| 1.2705 | 0.9063 |
| 1.2744 | 0.9106 |
| 1.2807 | 0.9149 |
| 1.2859 | 0.9182 |
| 1.2934 | 0.9255 |
| 1.2956 | 0.9276 |
| 1.3009 | 0.9303 |
| 1.3063 | 0.9349 |
| 1.3108 | 0.9392 |
| 1.3152 | 0.9439 |
| 1.3195 | 0.9486 |
| 1.3256 | 0.9527 |
| 1.3291 | 0.9568 |
| 1.3339 | 0.961  |
| 1.3385 | 0.9641 |
| 1.3431 | 0.9695 |
| 1.3471 | 0.9734 |

|        |        |
|--------|--------|
| 1.3516 | 0.9768 |
| 1.3553 | 0.9827 |
| 1.3583 | 0.9873 |
| 1.3621 | 0.99   |
| 1.3641 | 0.9936 |
| 1.3681 | 0.997  |
| 1.37   | 1.0003 |
| 1.3722 | 1.0043 |
| 1.373  | 1.009  |
| 1.3754 | 1.0138 |
| 1.3763 | 1.0167 |
| 1.3772 | 1.0206 |
| 1.3783 | 1.025  |
| 1.3799 | 1.0289 |
| 1.381  | 1.0333 |
| 1.3814 | 1.0374 |
| 1.3817 | 1.0395 |
| 1.3822 | 1.0438 |
| 1.3833 | 1.0473 |
| 1.3829 | 1.0519 |
| 1.3843 | 1.0556 |
| 1.3842 | 1.0594 |
| 1.3846 | 1.0627 |
| 1.3852 | 1.0658 |
| 1.3847 | 1.0689 |
| 1.3854 | 1.0741 |
| 1.3856 | 1.0773 |
| 1.3855 | 1.0804 |
| 1.3857 | 1.084  |
| 1.3859 | 1.0891 |
| 1.3858 | 1.092  |
| 1.3864 | 1.0952 |
| 1.3862 | 1.0983 |
| 1.3862 | 1.101  |
| 1.3862 | 1.105  |
| 1.3869 | 1.1094 |
| 1.3865 | 1.1135 |
| 1.3865 | 1.1166 |
| 1.3872 | 1.1195 |
| 1.3868 | 1.1242 |

**B17                      B18                      B19                      B20                      B21                      B22                      B23**

| <b>TIME</b> | <b>WT</b> | <b>WT(GA 3)</b> | <b>WT(RAD 3)</b> | <b>NO DRUG</b> | <b>GA 3uM</b> | <b>GA 7uM</b> | <b>NOVO 100</b> | <b>NOVO 250</b> | <b>RAD 3</b> | <b>RAD 10</b> |
|-------------|-----------|-----------------|------------------|----------------|---------------|---------------|-----------------|-----------------|--------------|---------------|
| 0           | 0.1894    | 0.2051          | 0.1892           | 0.1714         | 0.1542        | 0.1564        | 0.1971          | 1.554           | 0.2437       | 0.2871        |
| 0.25        | 0.1844    | 0.1929          | 0.1812           | 0.1659         | 0.1496        | 0.1479        | 0.1968          | 1.285           | 0.2367       | 0.2753        |
| 0.5         | 0.1833    | 0.1912          | 0.1787           | 0.1633         | 0.1476        | 0.1454        | 0.1996          | 1.3498          | 0.2326       | 0.2695        |
| 0.75        | 0.1838    | 0.189           | 0.1758           | 0.1601         | 0.1439        | 0.143         | 0.199           | 1.1625          | 0.2315       | 0.267         |

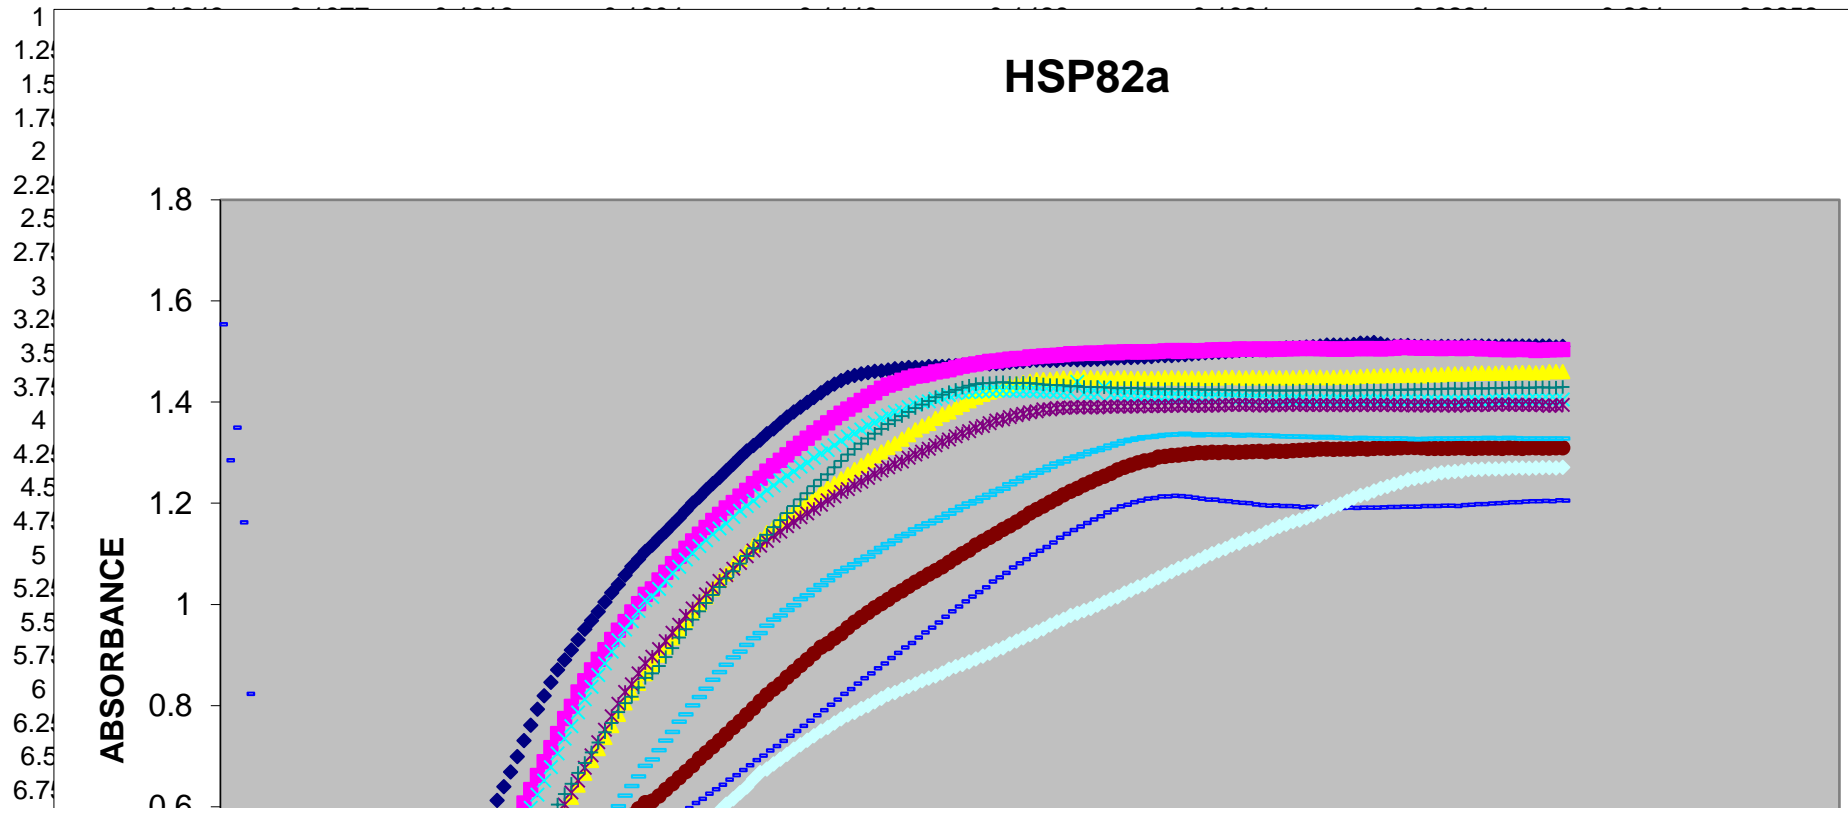

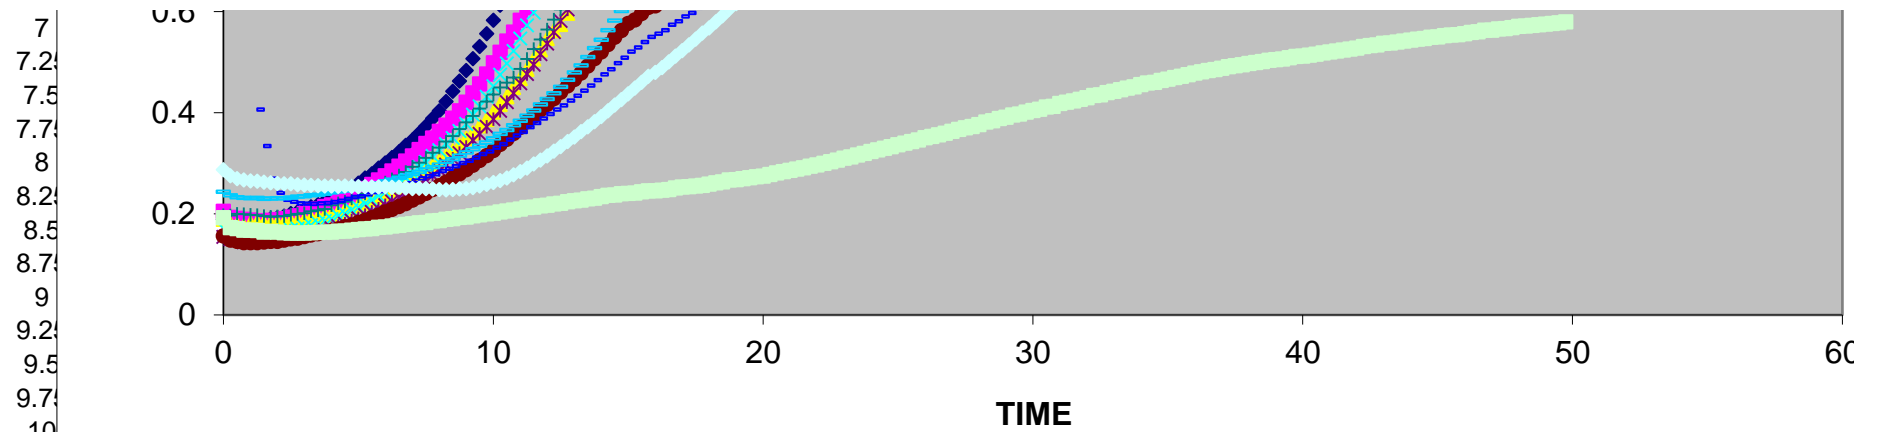

|       |        |        |        |        |        |        |        |        |        |        |
|-------|--------|--------|--------|--------|--------|--------|--------|--------|--------|--------|
| 10.5  | 0.6397 | 0.5418 | 0.4316 | 0.4974 | 0.421  | 0.3471 | 0.4593 | 0.3466 | 0.3655 | 0.271  |
| 10.75 | 0.6685 | 0.5593 | 0.4497 | 0.5219 | 0.4384 | 0.3589 | 0.4694 | 0.355  | 0.3751 | 0.2768 |
| 11    | 0.6992 | 0.5825 | 0.4678 | 0.5466 | 0.458  | 0.3707 | 0.4867 | 0.362  | 0.3841 | 0.2834 |
| 11.25 | 0.7307 | 0.6075 | 0.4857 | 0.5729 | 0.4764 | 0.3819 | 0.5064 | 0.3713 | 0.3944 | 0.2903 |
| 11.5  | 0.7614 | 0.6339 | 0.5059 | 0.5977 | 0.4947 | 0.3928 | 0.5255 | 0.3798 | 0.4042 | 0.2986 |
| 11.75 | 0.7927 | 0.6618 | 0.5242 | 0.6239 | 0.5159 | 0.4053 | 0.5445 | 0.3885 | 0.416  | 0.3065 |
| 12    | 0.8194 | 0.6889 | 0.5464 | 0.6514 | 0.5363 | 0.4163 | 0.5644 | 0.3971 | 0.4271 | 0.3144 |
| 12.25 | 0.8459 | 0.7168 | 0.5622 | 0.6782 | 0.559  | 0.428  | 0.5842 | 0.4064 | 0.4382 | 0.3239 |
| 12.5  | 0.8706 | 0.7448 | 0.5743 | 0.7055 | 0.5817 | 0.4403 | 0.6045 | 0.4144 | 0.4511 | 0.3329 |
| 12.75 | 0.8904 | 0.7744 | 0.5968 | 0.7344 | 0.6045 | 0.4531 | 0.6254 | 0.4239 | 0.4652 | 0.3427 |
| 13    | 0.9099 | 0.7982 | 0.6186 | 0.7594 | 0.6282 | 0.4656 | 0.6456 | 0.4333 | 0.4796 | 0.352  |
| 13.25 | 0.9301 | 0.8269 | 0.6426 | 0.7863 | 0.652  | 0.4781 | 0.667  | 0.4435 | 0.4937 | 0.3623 |
| 13.5  | 0.9508 | 0.849  | 0.6665 | 0.8123 | 0.6772 | 0.4921 | 0.6867 | 0.4536 | 0.51   | 0.3722 |
| 13.75 | 0.9679 | 0.8707 | 0.6913 | 0.8368 | 0.7016 | 0.5066 | 0.7073 | 0.4643 | 0.5276 | 0.382  |
| 14    | 0.986  | 0.8918 | 0.7152 | 0.8604 | 0.7278 | 0.5203 | 0.7272 | 0.4755 | 0.5439 | 0.3922 |
| 14.25 | 1.0047 | 0.9106 | 0.7372 | 0.8833 | 0.7526 | 0.5345 | 0.747  | 0.4861 | 0.5629 | 0.4038 |
| 14.5  | 1.0233 | 0.9308 | 0.7608 | 0.9064 | 0.7787 | 0.5489 | 0.7654 | 0.4978 | 0.5822 | 0.4148 |
| 14.75 | 1.0397 | 0.9491 | 0.7825 | 0.9294 | 0.8037 | 0.5625 | 0.7868 | 0.5089 | 0.6009 | 0.4256 |
| 15    | 1.0577 | 0.966  | 0.8057 | 0.9505 | 0.8269 | 0.5767 | 0.8048 | 0.521  | 0.6219 | 0.4372 |
| 15.25 | 1.0753 | 0.9853 | 0.8251 | 0.9671 | 0.8419 | 0.5831 | 0.8173 | 0.529  | 0.6407 | 0.4483 |
| 15.5  | 1.0897 | 1.0015 | 0.8439 | 0.9869 | 0.8638 | 0.5959 | 0.8357 | 0.5398 | 0.66   | 0.4598 |
| 15.75 | 1.1049 | 1.0198 | 0.8628 | 1.0088 | 0.8839 | 0.608  | 0.8547 | 0.5501 | 0.6806 | 0.4719 |
| 16    | 1.1171 | 1.031  | 0.8817 | 1.0148 | 0.8963 | 0.6113 | 0.8639 | 0.5561 | 0.6933 | 0.4793 |
| 16.25 | 1.1316 | 1.0487 | 0.8996 | 1.0309 | 0.9119 | 0.6216 | 0.8784 | 0.5632 | 0.7119 | 0.4889 |
| 16.5  | 1.1443 | 1.0637 | 0.9165 | 1.0474 | 0.9279 | 0.6342 | 0.8959 | 0.5739 | 0.7305 | 0.5006 |
| 16.75 | 1.1579 | 1.0806 | 0.9342 | 1.0622 | 0.9443 | 0.6456 | 0.9135 | 0.5811 | 0.748  | 0.512  |
| 17    | 1.1715 | 1.0952 | 0.9517 | 1.0743 | 0.96   | 0.6572 | 0.9345 | 0.5904 | 0.768  | 0.5229 |
| 17.25 | 1.1858 | 1.1114 | 0.9682 | 1.0891 | 0.9775 | 0.6691 | 0.9509 | 0.5974 | 0.7824 | 0.534  |



|       |        |        |        |        |        |        |        |        |        |        |
|-------|--------|--------|--------|--------|--------|--------|--------|--------|--------|--------|
| 17.5  | 1.2004 | 1.1256 | 0.9855 | 1.1009 | 0.9923 | 0.6817 | 0.97   | 0.6074 | 0.8004 | 0.5457 |
| 17.75 | 1.2123 | 1.1388 | 1.0016 | 1.1158 | 1.0065 | 0.6953 | 0.9864 | 0.6158 | 0.8167 | 0.5575 |
| 18    | 1.2261 | 1.1522 | 1.015  | 1.1266 | 1.0201 | 0.707  | 1.0029 | 0.6256 | 0.8336 | 0.5675 |
| 18.25 | 1.239  | 1.1664 | 1.0307 | 1.1387 | 1.0319 | 0.7189 | 1.0188 | 0.6346 | 0.8508 | 0.5795 |
| 18.5  | 1.251  | 1.1779 | 1.0478 | 1.1506 | 1.0467 | 0.7308 | 1.0346 | 0.6435 | 0.8662 | 0.5915 |
| 18.75 | 1.2641 | 1.1907 | 1.0607 | 1.1597 | 1.0581 | 0.7437 | 1.0515 | 0.6533 | 0.8808 | 0.6046 |
| 19    | 1.2773 | 1.2018 | 1.0765 | 1.1729 | 1.0709 | 0.7568 | 1.0655 | 0.6625 | 0.8952 | 0.6157 |
| 19.25 | 1.2907 | 1.2145 | 1.0891 | 1.185  | 1.0822 | 0.7689 | 1.081  | 0.6728 | 0.9064 | 0.6276 |
| 19.5  | 1.3032 | 1.2259 | 1.1041 | 1.1944 | 1.0952 | 0.7823 | 1.0956 | 0.682  | 0.9203 | 0.6392 |
| 19.75 | 1.3141 | 1.239  | 1.1166 | 1.2047 | 1.1064 | 0.7947 | 1.111  | 0.6923 | 0.9333 | 0.6543 |
| 20    | 1.3251 | 1.2497 | 1.1283 | 1.2152 | 1.1163 | 0.8085 | 1.1261 | 0.7012 | 0.9433 | 0.6676 |
| 20.25 | 1.3374 | 1.2637 | 1.1419 | 1.2254 | 1.1258 | 0.821  | 1.1378 | 0.7113 | 0.9577 | 0.6743 |
| 20.5  | 1.3474 | 1.2743 | 1.1521 | 1.2353 | 1.1359 | 0.8327 | 1.1527 | 0.7198 | 0.9702 | 0.6844 |
| 20.75 | 1.3589 | 1.2848 | 1.1637 | 1.245  | 1.1443 | 0.8429 | 1.1666 | 0.7303 | 0.9785 | 0.6943 |
| 21    | 1.3704 | 1.2956 | 1.1744 | 1.2541 | 1.1545 | 0.8563 | 1.1806 | 0.7404 | 0.989  | 0.7034 |
| 21.25 | 1.3806 | 1.3083 | 1.1829 | 1.2624 | 1.1629 | 0.8675 | 1.1949 | 0.75   | 0.9982 | 0.7134 |
| 21.5  | 1.39   | 1.3184 | 1.1906 | 1.2724 | 1.1723 | 0.8794 | 1.2076 | 0.76   | 1.0102 | 0.7225 |
| 21.75 | 1.3999 | 1.3289 | 1.2037 | 1.28   | 1.18   | 0.8906 | 1.2199 | 0.7701 | 1.0182 | 0.7315 |
| 22    | 1.4093 | 1.3395 | 1.2116 | 1.29   | 1.1891 | 0.9026 | 1.234  | 0.7806 | 1.0286 | 0.7405 |
| 22.25 | 1.4189 | 1.3493 | 1.2223 | 1.2981 | 1.1969 | 0.9153 | 1.2468 | 0.7912 | 1.0382 | 0.7496 |
| 22.5  | 1.4278 | 1.3589 | 1.2316 | 1.3053 | 1.2058 | 0.9224 | 1.257  | 0.8017 | 1.0481 | 0.7565 |
| 22.75 | 1.4356 | 1.369  | 1.2391 | 1.3147 | 1.2138 | 0.9335 | 1.2712 | 0.8121 | 1.057  | 0.7659 |
| 23    | 1.4425 | 1.3781 | 1.2485 | 1.3239 | 1.2222 | 0.942  | 1.2838 | 0.8232 | 1.0656 | 0.7737 |
| 23.25 | 1.4488 | 1.3861 | 1.257  | 1.3319 | 1.2279 | 0.9541 | 1.2962 | 0.8327 | 1.0726 | 0.7817 |
| 23.5  | 1.4527 | 1.3947 | 1.2667 | 1.3381 | 1.236  | 0.9648 | 1.307  | 0.8432 | 1.0794 | 0.7865 |
| 23.75 | 1.4559 | 1.4037 | 1.2752 | 1.3456 | 1.2425 | 0.9744 | 1.3178 | 0.8539 | 1.0877 | 0.7942 |
| 24    | 1.4583 | 1.4119 | 1.2845 | 1.3535 | 1.2504 | 0.9838 | 1.3284 | 0.8639 | 1.0947 | 0.7999 |
| 24.25 | 1.4609 | 1.4188 | 1.2937 | 1.3596 | 1.258  | 0.9931 | 1.3374 | 0.8739 | 1.1037 | 0.8073 |
| 24.5  | 1.4615 | 1.4276 | 1.3014 | 1.3675 | 1.2646 | 1.0016 | 1.3473 | 0.8836 | 1.112  | 0.8141 |
| 24.75 | 1.4635 | 1.4341 | 1.3101 | 1.3735 | 1.2712 | 1.01   | 1.3565 | 0.8943 | 1.1191 | 0.8217 |
| 25    | 1.466  | 1.4379 | 1.3177 | 1.38   | 1.2773 | 1.0196 | 1.3643 | 0.9041 | 1.126  | 0.8257 |
| 25.25 | 1.4669 | 1.4431 | 1.3269 | 1.3831 | 1.2826 | 1.0268 | 1.3727 | 0.9148 | 1.1351 | 0.8321 |
| 25.5  | 1.4687 | 1.4476 | 1.3358 | 1.3904 | 1.2901 | 1.036  | 1.3807 | 0.9235 | 1.1396 | 0.8376 |
| 25.75 | 1.4687 | 1.4518 | 1.345  | 1.3951 | 1.2965 | 1.044  | 1.3885 | 0.9343 | 1.1483 | 0.8427 |
| 26    | 1.4682 | 1.453  | 1.3526 | 1.3994 | 1.3024 | 1.0516 | 1.3953 | 0.9447 | 1.1549 | 0.849  |
| 26.25 | 1.4704 | 1.4557 | 1.3577 | 1.4018 | 1.308  | 1.06   | 1.4019 | 0.9539 | 1.1604 | 0.854  |
| 26.5  | 1.4702 | 1.4595 | 1.368  | 1.4067 | 1.3147 | 1.0668 | 1.4095 | 0.9642 | 1.1657 | 0.8587 |
| 26.75 | 1.4706 | 1.4619 | 1.3756 | 1.4103 | 1.3211 | 1.0743 | 1.4149 | 0.9754 | 1.1716 | 0.8643 |
| 27    | 1.4716 | 1.4639 | 1.3808 | 1.4144 | 1.3264 | 1.0834 | 1.4198 | 0.9864 | 1.1792 | 0.8718 |
| 27.25 | 1.4725 | 1.4677 | 1.3894 | 1.4181 | 1.3323 | 1.0918 | 1.4242 | 0.9959 | 1.1861 | 0.8769 |
| 27.5  | 1.473  | 1.4709 | 1.396  | 1.4199 | 1.3383 | 1.1003 | 1.4289 | 1.006  | 1.1933 | 0.8815 |
| 27.75 | 1.4747 | 1.4735 | 1.4025 | 1.4197 | 1.3428 | 1.107  | 1.4328 | 1.0157 | 1.1998 | 0.8865 |

|       |        |        |        |        |        |        |        |        |        |        |
|-------|--------|--------|--------|--------|--------|--------|--------|--------|--------|--------|
| 28    | 1.4747 | 1.4758 | 1.4095 | 1.4207 | 1.349  | 1.1175 | 1.4354 | 1.0244 | 1.204  | 0.8924 |
| 28.25 | 1.4772 | 1.4784 | 1.4156 | 1.4212 | 1.3531 | 1.1249 | 1.4377 | 1.0341 | 1.211  | 0.8976 |
| 28.5  | 1.4758 | 1.4806 | 1.4201 | 1.4223 | 1.3587 | 1.1328 | 1.4378 | 1.0453 | 1.2169 | 0.9034 |
| 28.75 | 1.4763 | 1.4813 | 1.4239 | 1.4232 | 1.3633 | 1.1404 | 1.4389 | 1.0538 | 1.2243 | 0.9096 |
| 29    | 1.4771 | 1.4829 | 1.4289 | 1.4225 | 1.3663 | 1.1484 | 1.4392 | 1.0622 | 1.2289 | 0.9143 |
| 29.25 | 1.4786 | 1.485  | 1.4341 | 1.4223 | 1.3708 | 1.1556 | 1.4384 | 1.0729 | 1.2378 | 0.9222 |
| 29.5  | 1.4803 | 1.4861 | 1.4367 | 1.4218 | 1.3745 | 1.1631 | 1.4376 | 1.0812 | 1.2436 | 0.9276 |
| 29.75 | 1.4807 | 1.4866 | 1.4387 | 1.4219 | 1.3771 | 1.1709 | 1.4382 | 1.0897 | 1.2501 | 0.9339 |
| 30    | 1.4823 | 1.4892 | 1.4412 | 1.422  | 1.3803 | 1.1804 | 1.4375 | 1.0983 | 1.2545 | 0.94   |
| 30.25 | 1.4831 | 1.49   | 1.4444 | 1.4215 | 1.3822 | 1.1874 | 1.4362 | 1.1061 | 1.2603 | 0.9459 |
| 30.5  | 1.4829 | 1.4913 | 1.4444 | 1.4203 | 1.3857 | 1.1945 | 1.4352 | 1.1135 | 1.2657 | 0.9519 |
| 30.75 | 1.4823 | 1.4923 | 1.4446 | 1.4202 | 1.386  | 1.2021 | 1.434  | 1.1222 | 1.2723 | 0.959  |
| 31    | 1.4825 | 1.4929 | 1.4466 | 1.4203 | 1.3881 | 1.2089 | 1.4336 | 1.1317 | 1.279  | 0.9658 |
| 31.25 | 1.4843 | 1.4939 | 1.448  | 1.4192 | 1.389  | 1.2166 | 1.4332 | 1.1393 | 1.2823 | 0.9707 |
| 31.5  | 1.4842 | 1.496  | 1.4475 | 1.4187 | 1.3896 | 1.2238 | 1.4314 | 1.147  | 1.289  | 0.9783 |
| 31.75 | 1.4837 | 1.4956 | 1.4475 | 1.4404 | 1.3897 | 1.2293 | 1.4318 | 1.1542 | 1.2927 | 0.9829 |
| 32    | 1.4837 | 1.4964 | 1.4488 | 1.4164 | 1.3905 | 1.2361 | 1.4302 | 1.1609 | 1.2972 | 0.9879 |
| 32.25 | 1.4847 | 1.4969 | 1.4483 | 1.4165 | 1.3897 | 1.2423 | 1.4303 | 1.1678 | 1.3024 | 0.9922 |
| 32.5  | 1.4848 | 1.4964 | 1.448  | 1.4167 | 1.3894 | 1.2486 | 1.4298 | 1.1746 | 1.3051 | 0.9987 |
| 32.75 | 1.4858 | 1.4974 | 1.448  | 1.4295 | 1.3907 | 1.2535 | 1.4293 | 1.182  | 1.3091 | 1.004  |
| 33    | 1.4867 | 1.4992 | 1.4467 | 1.415  | 1.3911 | 1.2591 | 1.4288 | 1.1874 | 1.3145 | 1.0104 |
| 33.25 | 1.4876 | 1.498  | 1.4476 | 1.4145 | 1.3913 | 1.2658 | 1.4275 | 1.1937 | 1.3181 | 1.0146 |
| 33.5  | 1.4885 | 1.4993 | 1.4481 | 1.4138 | 1.3913 | 1.2714 | 1.428  | 1.1971 | 1.3229 | 1.0227 |
| 33.75 | 1.4883 | 1.4994 | 1.4469 | 1.4131 | 1.3912 | 1.2757 | 1.4284 | 1.2021 | 1.3256 | 1.0285 |
| 34    | 1.4888 | 1.4988 | 1.4474 | 1.4117 | 1.3916 | 1.2799 | 1.4274 | 1.2055 | 1.3283 | 1.0343 |
| 34.25 | 1.4892 | 1.4995 | 1.4471 | 1.4125 | 1.3925 | 1.2836 | 1.4267 | 1.2094 | 1.3309 | 1.0389 |
| 34.5  | 1.4899 | 1.4996 | 1.4474 | 1.4115 | 1.3922 | 1.2859 | 1.4258 | 1.2104 | 1.3312 | 1.0456 |
| 34.75 | 1.4919 | 1.5003 | 1.4472 | 1.4113 | 1.3918 | 1.2913 | 1.4267 | 1.2134 | 1.333  | 1.0528 |
| 35    | 1.492  | 1.5014 | 1.4486 | 1.4111 | 1.3927 | 1.2928 | 1.4256 | 1.2138 | 1.3353 | 1.0586 |
| 35.25 | 1.4922 | 1.502  | 1.4486 | 1.4105 | 1.3927 | 1.2943 | 1.4265 | 1.215  | 1.3357 | 1.065  |
| 35.5  | 1.4933 | 1.5004 | 1.4477 | 1.4099 | 1.3935 | 1.2955 | 1.4258 | 1.2142 | 1.3363 | 1.071  |
| 35.75 | 1.4939 | 1.5019 | 1.4479 | 1.4102 | 1.394  | 1.2973 | 1.4255 | 1.213  | 1.3374 | 1.0763 |
| 36    | 1.4951 | 1.5018 | 1.4476 | 1.4109 | 1.3925 | 1.2981 | 1.4255 | 1.2113 | 1.3363 | 1.082  |
| 36.25 | 1.4965 | 1.5015 | 1.4469 | 1.4089 | 1.3925 | 1.3    | 1.4254 | 1.2091 | 1.3347 | 1.0874 |
| 36.5  | 1.4976 | 1.5021 | 1.4473 | 1.4082 | 1.3933 | 1.2996 | 1.424  | 1.2074 | 1.3363 | 1.0947 |
| 36.75 | 1.4983 | 1.5037 | 1.4481 | 1.4086 | 1.3936 | 1.301  | 1.4252 | 1.2071 | 1.3356 | 1.1006 |
| 37    | 1.4992 | 1.5034 | 1.4477 | 1.408  | 1.3935 | 1.3003 | 1.4249 | 1.2045 | 1.3352 | 1.106  |
| 37.25 | 1.4997 | 1.504  | 1.449  | 1.4078 | 1.3943 | 1.3013 | 1.424  | 1.2038 | 1.3358 | 1.1102 |
| 37.5  | 1.5011 | 1.5037 | 1.4489 | 1.4078 | 1.3943 | 1.3005 | 1.4236 | 1.202  | 1.3355 | 1.1173 |
| 37.75 | 1.502  | 1.505  | 1.4486 | 1.4063 | 1.395  | 1.301  | 1.4237 | 1.2007 | 1.3338 | 1.1209 |
| 38    | 1.5029 | 1.5047 | 1.4475 | 1.406  | 1.3947 | 1.3015 | 1.4238 | 1.2    | 1.3351 | 1.1279 |
| 38.25 | 1.5029 | 1.5046 | 1.449  | 1.4058 | 1.3948 | 1.302  | 1.4232 | 1.1977 | 1.3351 | 1.1306 |

|       |        |        |        |        |        |        |        |        |        |        |
|-------|--------|--------|--------|--------|--------|--------|--------|--------|--------|--------|
| 38.5  | 1.504  | 1.505  | 1.4481 | 1.4059 | 1.3935 | 1.3028 | 1.423  | 1.1967 | 1.3344 | 1.136  |
| 38.75 | 1.5035 | 1.5042 | 1.448  | 1.4056 | 1.3933 | 1.3018 | 1.4236 | 1.1952 | 1.3337 | 1.1425 |
| 39    | 1.5042 | 1.505  | 1.4488 | 1.4042 | 1.3942 | 1.3032 | 1.4229 | 1.1957 | 1.3341 | 1.1482 |
| 39.25 | 1.5058 | 1.5049 | 1.4482 | 1.404  | 1.3938 | 1.3025 | 1.4228 | 1.1943 | 1.3327 | 1.1539 |
| 39.5  | 1.507  | 1.5052 | 1.4485 | 1.4045 | 1.3947 | 1.3031 | 1.423  | 1.1944 | 1.3324 | 1.1587 |
| 39.75 | 1.5073 | 1.506  | 1.4484 | 1.4038 | 1.3956 | 1.3042 | 1.4229 | 1.194  | 1.3317 | 1.1637 |
| 40    | 1.5077 | 1.5062 | 1.4489 | 1.4043 | 1.3943 | 1.3046 | 1.4228 | 1.1922 | 1.332  | 1.1668 |
| 40.25 | 1.5093 | 1.5063 | 1.4496 | 1.4036 | 1.3948 | 1.3056 | 1.4242 | 1.1932 | 1.3312 | 1.1713 |
| 40.5  | 1.5096 | 1.506  | 1.4489 | 1.4032 | 1.3941 | 1.3058 | 1.4234 | 1.1924 | 1.3313 | 1.1772 |
| 40.75 | 1.5108 | 1.5059 | 1.4494 | 1.4036 | 1.3944 | 1.307  | 1.4236 | 1.1916 | 1.3302 | 1.1827 |
| 41    | 1.5129 | 1.5053 | 1.4485 | 1.4042 | 1.3947 | 1.3071 | 1.4245 | 1.1918 | 1.331  | 1.1886 |
| 41.25 | 1.5127 | 1.5048 | 1.4491 | 1.4034 | 1.3941 | 1.3064 | 1.4233 | 1.1919 | 1.3302 | 1.1931 |
| 41.5  | 1.513  | 1.5052 | 1.4495 | 1.404  | 1.3946 | 1.3073 | 1.423  | 1.1907 | 1.3295 | 1.1985 |
| 41.75 | 1.513  | 1.5045 | 1.4496 | 1.4031 | 1.3939 | 1.3074 | 1.4228 | 1.1915 | 1.3289 | 1.2044 |
| 42    | 1.5143 | 1.506  | 1.4492 | 1.4029 | 1.394  | 1.3074 | 1.4231 | 1.1909 | 1.3288 | 1.2102 |
| 42.25 | 1.5164 | 1.506  | 1.4512 | 1.4033 | 1.3953 | 1.3082 | 1.4234 | 1.1913 | 1.3291 | 1.2154 |
| 42.5  | 1.5166 | 1.5062 | 1.4516 | 1.404  | 1.3943 | 1.3073 | 1.4242 | 1.1913 | 1.3287 | 1.2188 |
| 42.75 | 1.518  | 1.506  | 1.4518 | 1.4036 | 1.3937 | 1.3088 | 1.4234 | 1.1915 | 1.3287 | 1.2242 |
| 43    | 1.5154 | 1.5053 | 1.4522 | 1.4038 | 1.3955 | 1.3094 | 1.4237 | 1.1919 | 1.3281 | 1.2297 |
| 43.25 | 1.5129 | 1.5059 | 1.4522 | 1.4026 | 1.3945 | 1.3086 | 1.4244 | 1.1924 | 1.3276 | 1.2332 |
| 43.5  | 1.5111 | 1.5064 | 1.4527 | 1.4029 | 1.3938 | 1.3093 | 1.4246 | 1.1925 | 1.3279 | 1.2379 |
| 43.75 | 1.5114 | 1.5084 | 1.453  | 1.4033 | 1.3937 | 1.31   | 1.4245 | 1.1934 | 1.3279 | 1.2416 |
| 44    | 1.5125 | 1.5078 | 1.4529 | 1.4034 | 1.3938 | 1.3101 | 1.4247 | 1.1934 | 1.3272 | 1.2463 |
| 44.25 | 1.5102 | 1.5073 | 1.4529 | 1.4033 | 1.3931 | 1.3102 | 1.4252 | 1.1936 | 1.3267 | 1.2489 |
| 44.5  | 1.5105 | 1.5065 | 1.4523 | 1.4033 | 1.3939 | 1.3097 | 1.4253 | 1.1946 | 1.327  | 1.2515 |
| 44.75 | 1.5104 | 1.5065 | 1.454  | 1.4025 | 1.3934 | 1.3084 | 1.4264 | 1.1949 | 1.3274 | 1.2541 |
| 45    | 1.5092 | 1.5064 | 1.4543 | 1.4028 | 1.3933 | 1.3083 | 1.4256 | 1.1946 | 1.3274 | 1.2579 |
| 45.25 | 1.5105 | 1.5057 | 1.4541 | 1.4019 | 1.3941 | 1.3084 | 1.4264 | 1.195  | 1.3279 | 1.2603 |
| 45.5  | 1.5103 | 1.5065 | 1.4557 | 1.4035 | 1.3942 | 1.3085 | 1.4267 | 1.1953 | 1.3277 | 1.262  |
| 45.75 | 1.51   | 1.5067 | 1.4559 | 1.4024 | 1.3928 | 1.3089 | 1.4268 | 1.1949 | 1.3284 | 1.2628 |
| 46    | 1.5108 | 1.5061 | 1.4561 | 1.4024 | 1.3938 | 1.3097 | 1.4263 | 1.1967 | 1.3282 | 1.2639 |
| 46.25 | 1.5109 | 1.5064 | 1.456  | 1.4036 | 1.3945 | 1.3087 | 1.4271 | 1.197  | 1.3287 | 1.2667 |
| 46.5  | 1.511  | 1.5069 | 1.4571 | 1.4035 | 1.3942 | 1.3087 | 1.4273 | 1.1983 | 1.3288 | 1.2667 |
| 46.75 | 1.511  | 1.5052 | 1.4577 | 1.4021 | 1.3943 | 1.3091 | 1.4269 | 1.1987 | 1.3286 | 1.2674 |
| 47    | 1.5111 | 1.5059 | 1.4574 | 1.403  | 1.3946 | 1.3093 | 1.4277 | 1.1994 | 1.3294 | 1.2682 |
| 47.25 | 1.5102 | 1.5042 | 1.4571 | 1.4038 | 1.3954 | 1.309  | 1.4282 | 1.2004 | 1.3288 | 1.2677 |
| 47.5  | 1.5112 | 1.5044 | 1.4583 | 1.4051 | 1.3958 | 1.3084 | 1.4273 | 1.2011 | 1.329  | 1.2682 |
| 47.75 | 1.5109 | 1.5036 | 1.4575 | 1.4049 | 1.3947 | 1.3095 | 1.4286 | 1.202  | 1.3294 | 1.2692 |
| 48    | 1.511  | 1.5046 | 1.4582 | 1.4042 | 1.3949 | 1.3092 | 1.4285 | 1.2021 | 1.3289 | 1.2699 |
| 48.25 | 1.511  | 1.5042 | 1.4587 | 1.4043 | 1.3948 | 1.3084 | 1.4285 | 1.2037 | 1.3281 | 1.2699 |
| 48.5  | 1.5111 | 1.504  | 1.4592 | 1.4042 | 1.3943 | 1.3097 | 1.4283 | 1.2039 | 1.3277 | 1.2694 |
| 48.75 | 1.5107 | 1.5019 | 1.4578 | 1.4048 | 1.3943 | 1.3096 | 1.4291 | 1.2043 | 1.3282 | 1.2699 |

|       |        |        |        |        |        |        |        |        |        |        |
|-------|--------|--------|--------|--------|--------|--------|--------|--------|--------|--------|
| 49    | 1.5112 | 1.5026 | 1.4586 | 1.4047 | 1.3939 | 1.3094 | 1.4295 | 1.2047 | 1.3275 | 1.2708 |
| 49.25 | 1.5109 | 1.5034 | 1.4604 | 1.4042 | 1.3928 | 1.309  | 1.429  | 1.2043 | 1.3284 | 1.2704 |
| 49.5  | 1.5094 | 1.504  | 1.4603 | 1.4042 | 1.3935 | 1.3096 | 1.4286 | 1.2062 | 1.3272 | 1.2701 |
| 49.75 | 1.5105 | 1.5038 | 1.4602 | 1.4051 | 1.3946 | 1.3096 | 1.4301 | 1.2054 | 1.3281 | 1.2711 |

**B24**

**RAD 30**

0.1922  
0.1727  
0.1711  
0.1677

- ◆ WT
- WT(GA 3)
- ▲ WT(RAD 3)
- × NO DRUG
- \* GA 3uM
- GA 7uM
- + NOVO 100
- NOVO 250
- RAD 3

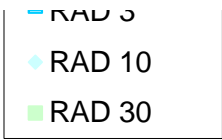

)

- 0.2055
- 0.2077
- 0.2096
- 0.2125
- 0.2134
- 0.2159
- 0.2172
- 0.2198
- 0.2211
- 0.2239
- 0.226
- 0.227
- 0.2297
- 0.2312
- 0.2338
- 0.2368
- 0.237
- 0.2397
- 0.2404
- 0.2412
- 0.2436
- 0.2453
- 0.2452
- 0.2466
- 0.2477
- 0.251
- 0.2533
- 0.2538

0.2547  
0.2563  
0.2587  
0.2611  
0.2634  
0.2669  
0.2674  
0.2693  
0.2716  
0.2733  
0.2746  
0.2779  
0.2806  
0.2832  
0.286  
0.2887  
0.291  
0.2942  
0.2968  
0.3001  
0.3029  
0.3065  
0.3103  
0.3128  
0.3164  
0.3198  
0.3232  
0.3267  
0.3299  
0.3326  
0.3363  
0.3399  
0.343  
0.3458  
0.3503  
0.3529  
0.3563  
0.3595  
0.3632  
0.3672  
0.3704  
0.3729

0.3767  
0.3816  
0.3843  
0.3882  
0.3909  
0.3952  
0.3975  
0.401  
0.4043  
0.4068  
0.4111  
0.4127  
0.4179  
0.4206  
0.4232  
0.4263  
0.4296  
0.4343  
0.4353  
0.4399  
0.4423  
0.4455  
0.4485  
0.4512  
0.4554  
0.4584  
0.4597  
0.4638  
0.4663  
0.4696  
0.4721  
0.4753  
0.4784  
0.4806  
0.4833  
0.4854  
0.488  
0.4909  
0.493  
0.4947  
0.4974  
0.4989



0.5013  
0.5035  
0.5052  
0.5064  
0.5089  
0.5115  
0.5121  
0.514  
0.5157  
0.5181  
0.5198  
0.522  
0.5238  
0.5255  
0.5274  
0.5306  
0.533  
0.5338  
0.537  
0.5379  
0.5394  
0.5417  
0.5435  
0.5452  
0.5465  
0.5489  
0.5501  
0.5521  
0.5537  
0.5542  
0.5559  
0.5588  
0.5601  
0.5628  
0.5632  
0.5654  
0.5665  
0.5684  
0.5706  
0.5715  
0.5728  
0.5739

0.5752  
0.5764  
0.5777  
0.5795

HSP 12

|             |           |                 |                  | <b>M1</b>      | <b>M2</b>     | <b>M3</b>     | <b>M4</b>       | <b>M5</b>       |
|-------------|-----------|-----------------|------------------|----------------|---------------|---------------|-----------------|-----------------|
| <b>TIME</b> | <b>WT</b> | <b>WT(GA 3)</b> | <b>WT(RAD 3)</b> | <b>NO DRUG</b> | <b>GA 3uM</b> | <b>GA 7uM</b> | <b>NOVO 100</b> | <b>NOVO 250</b> |
| 0           | 0.1894    | 0.2051          | 0.1892           | 0.1698         | 0.1703        | 0.1621        | 0.2107          | 0.2736          |
| 0.25        | 0.1844    | 0.1929          | 0.1812           | 0.1605         | 0.1622        | 0.1526        | 0.2135          | 0.2759          |
| 0.5         | 0.1833    | 0.1912          | 0.1787           | 0.1606         | 0.1591        | 0.1511        | 0.2106          | 0.2799          |
| 0.75        | 0.1838    | 0.189           | 0.1758           | 0.1603         | 0.1593        | 0.1517        | 0.209           | 0.2816          |
| 1           | 0.1843    | 0.1877          | 0.1818           | 0.1608         | 0.1597        | 0.1518        | 0.211           | 0.286           |

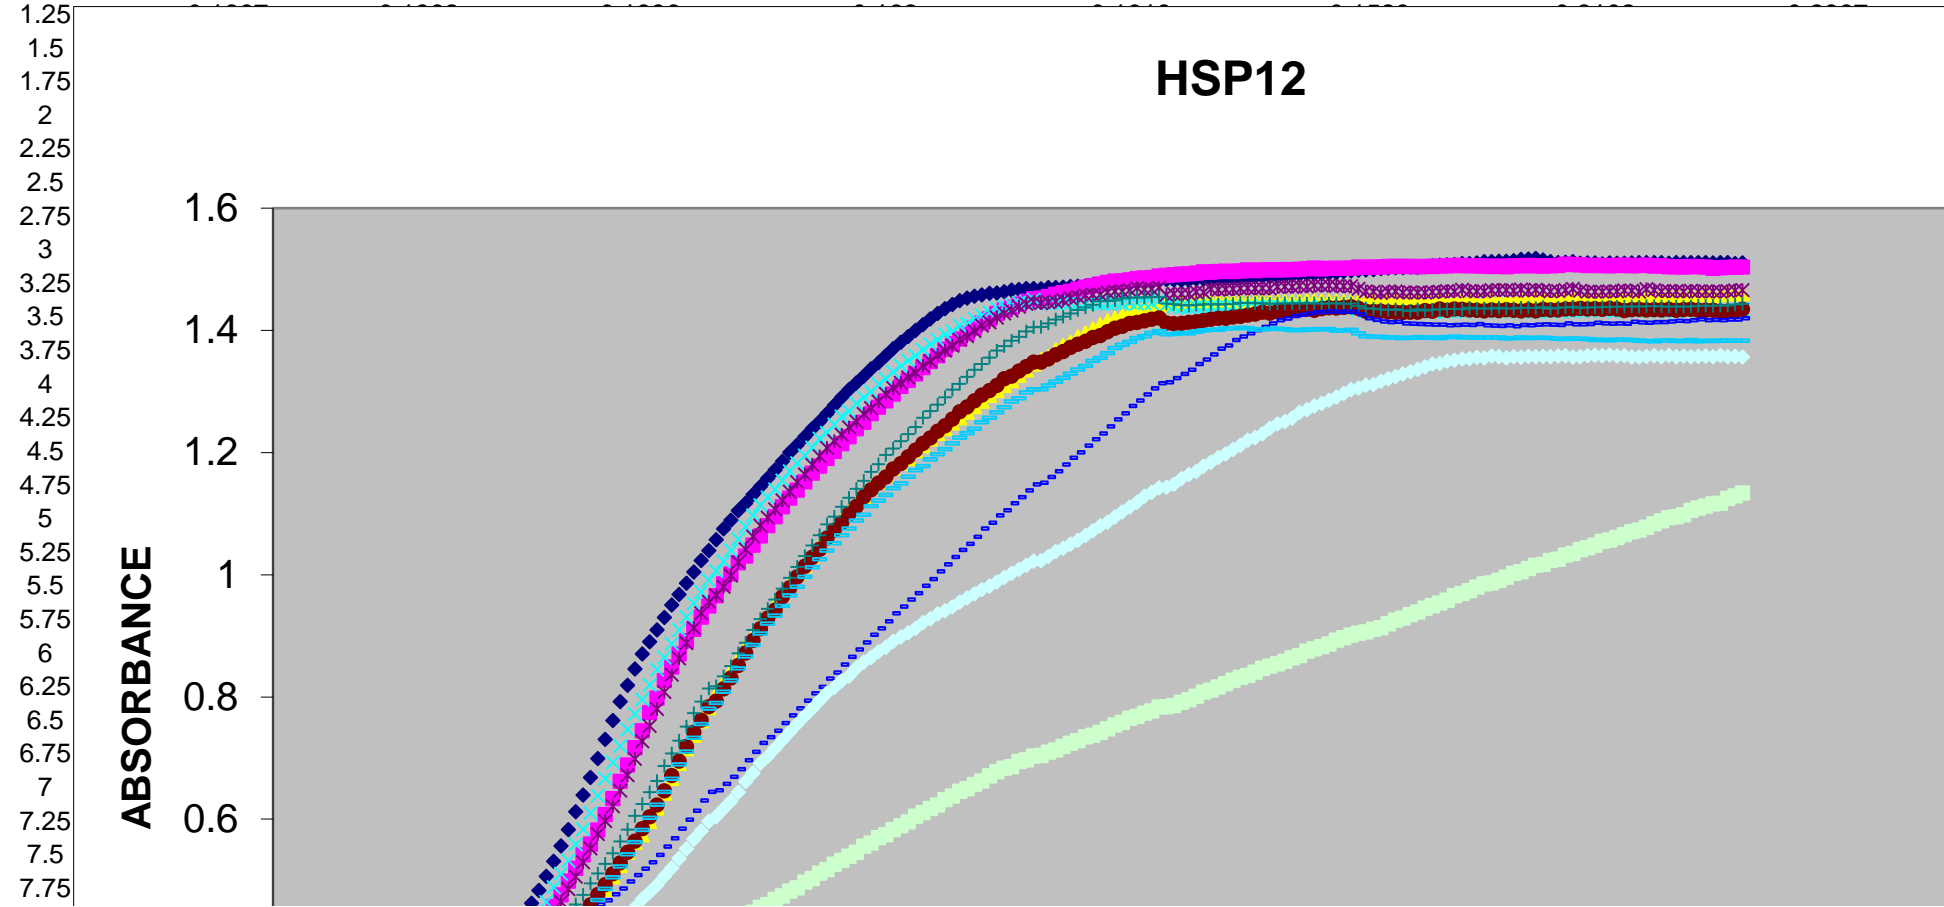

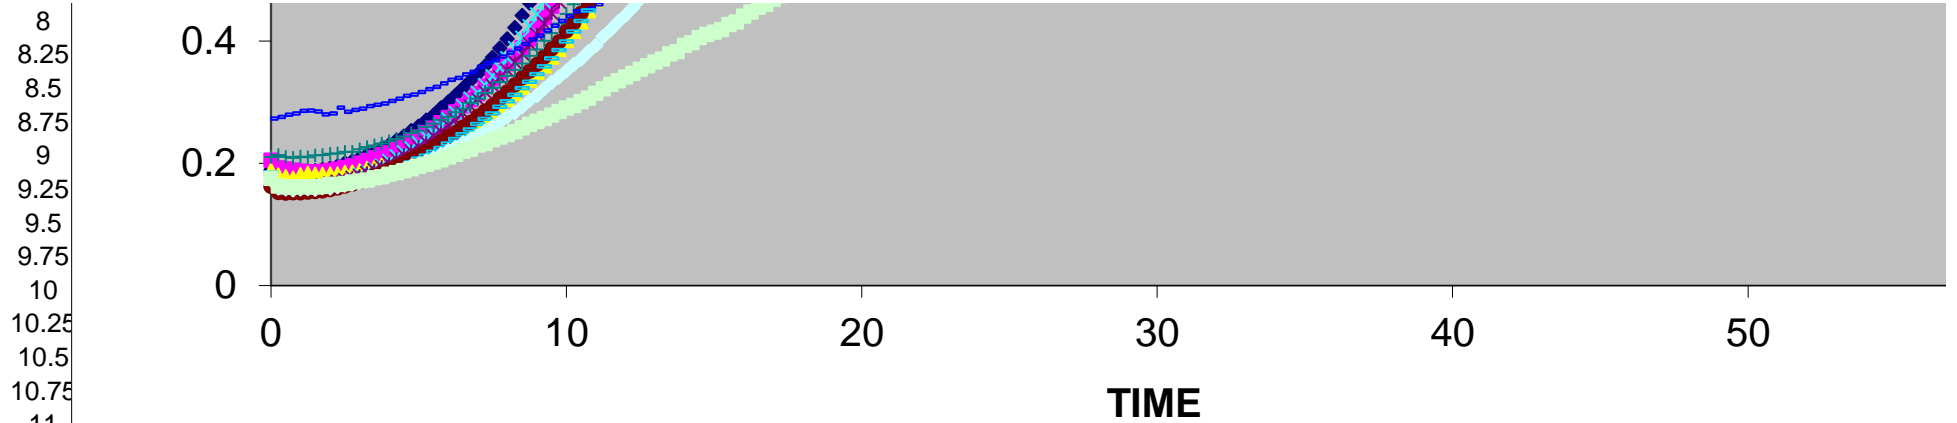

|       |        |        |        |        |        |        |        |        |
|-------|--------|--------|--------|--------|--------|--------|--------|--------|
| 11.5  | 0.7614 | 0.6339 | 0.5059 | 0.693  | 0.6214 | 0.5109 | 0.5444 | 0.4769 |
| 11.75 | 0.7927 | 0.6618 | 0.5242 | 0.7197 | 0.6467 | 0.5287 | 0.5636 | 0.4863 |
| 12    | 0.8194 | 0.6889 | 0.5464 | 0.7467 | 0.6722 | 0.546  | 0.583  | 0.498  |
| 12.25 | 0.8459 | 0.7168 | 0.5622 | 0.7722 | 0.6986 | 0.5641 | 0.6052 | 0.5087 |
| 12.5  | 0.8706 | 0.7448 | 0.5743 | 0.7961 | 0.7275 | 0.5843 | 0.6249 | 0.519  |
| 12.75 | 0.8904 | 0.7744 | 0.5968 | 0.8199 | 0.7528 | 0.6038 | 0.6444 | 0.5297 |
| 13    | 0.9099 | 0.7982 | 0.6186 | 0.8446 | 0.7806 | 0.6232 | 0.6627 | 0.5415 |
| 13.25 | 0.9301 | 0.8269 | 0.6426 | 0.8648 | 0.8082 | 0.6461 | 0.6871 | 0.555  |
| 13.5  | 0.9508 | 0.849  | 0.6665 | 0.8874 | 0.8365 | 0.6713 | 0.7075 | 0.5686 |
| 13.75 | 0.9679 | 0.8707 | 0.6913 | 0.91   | 0.863  | 0.6948 | 0.7285 | 0.5844 |
| 14    | 0.986  | 0.8918 | 0.7152 | 0.9305 | 0.8882 | 0.7191 | 0.7518 | 0.5994 |
| 14.25 | 1.0047 | 0.9106 | 0.7372 | 0.9534 | 0.913  | 0.742  | 0.7738 | 0.614  |
| 14.5  | 1.0233 | 0.9308 | 0.7608 | 0.972  | 0.937  | 0.762  | 0.7924 | 0.6308 |
| 14.75 | 1.0397 | 0.9491 | 0.7825 | 0.9911 | 0.9559 | 0.784  | 0.8139 | 0.6448 |
| 15    | 1.0577 | 0.966  | 0.8057 | 1.0063 | 0.9661 | 0.7933 | 0.8174 | 0.6471 |
| 15.25 | 1.0753 | 0.9853 | 0.8251 | 1.022  | 0.9805 | 0.8135 | 0.8339 | 0.658  |
| 15.5  | 1.0897 | 1.0015 | 0.8439 | 1.0402 | 0.9987 | 0.8311 | 0.8505 | 0.6694 |
| 15.75 | 1.1049 | 1.0198 | 0.8628 | 1.0586 | 1.0207 | 0.8518 | 0.8717 | 0.6821 |
| 16    | 1.1171 | 1.031  | 0.8817 | 1.0786 | 1.042  | 0.8723 | 0.8886 | 0.6966 |
| 16.25 | 1.1316 | 1.0487 | 0.8996 | 1.0972 | 1.0628 | 0.8925 | 0.9097 | 0.7103 |
| 16.5  | 1.1443 | 1.0637 | 0.9165 | 1.114  | 1.0804 | 0.9118 | 0.9277 | 0.7251 |
| 16.75 | 1.1579 | 1.0806 | 0.9342 | 1.1268 | 1.0937 | 0.9292 | 0.9441 | 0.7345 |
| 17    | 1.1715 | 1.0952 | 0.9517 | 1.1399 | 1.1075 | 0.9421 | 0.9593 | 0.7446 |
| 17.25 | 1.1858 | 1.1114 | 0.9682 | 1.1544 | 1.1219 | 0.964  | 0.9771 | 0.7571 |
| 17.5  | 1.2004 | 1.1256 | 0.9855 | 1.1697 | 1.1361 | 0.9789 | 0.9949 | 0.7698 |
| 17.75 | 1.2123 | 1.1388 | 1.0016 | 1.1825 | 1.152  | 0.9966 | 1.0132 | 0.7814 |
| 18    | 1.2261 | 1.1522 | 1.015  | 1.1953 | 1.1641 | 1.0139 | 1.0306 | 0.7939 |
| 18.25 | 1.239  | 1.1664 | 1.0307 | 1.2084 | 1.18   | 1.0285 | 1.048  | 0.8059 |

|       |        |        |        |        |        |        |        |        |
|-------|--------|--------|--------|--------|--------|--------|--------|--------|
| 18.5  | 1.251  | 1.1779 | 1.0478 | 1.2231 | 1.1941 | 1.0419 | 1.0647 | 0.8164 |
| 18.75 | 1.2641 | 1.1907 | 1.0607 | 1.2322 | 1.2078 | 1.0599 | 1.0825 | 0.83   |
| 19    | 1.2773 | 1.2018 | 1.0765 | 1.2459 | 1.2187 | 1.0733 | 1.095  | 0.84   |
| 19.25 | 1.2907 | 1.2145 | 1.0891 | 1.2592 | 1.2291 | 1.0852 | 1.1114 | 0.8534 |
| 19.5  | 1.3032 | 1.2259 | 1.1041 | 1.2674 | 1.2415 | 1.0999 | 1.1263 | 0.8657 |
| 19.75 | 1.3141 | 1.239  | 1.1166 | 1.2806 | 1.2508 | 1.1118 | 1.1406 | 0.8779 |
| 20    | 1.3251 | 1.2497 | 1.1283 | 1.2899 | 1.2634 | 1.1277 | 1.1538 | 0.8892 |
| 20.25 | 1.3374 | 1.2637 | 1.1419 | 1.2996 | 1.2728 | 1.1393 | 1.1683 | 0.9017 |
| 20.5  | 1.3474 | 1.2743 | 1.1521 | 1.312  | 1.2839 | 1.1504 | 1.1812 | 0.9122 |
| 20.75 | 1.3589 | 1.2848 | 1.1637 | 1.3212 | 1.2962 | 1.1602 | 1.1961 | 0.9239 |
| 21    | 1.3704 | 1.2956 | 1.1744 | 1.3321 | 1.3057 | 1.1732 | 1.2066 | 0.9368 |
| 21.25 | 1.3806 | 1.3083 | 1.1829 | 1.3419 | 1.3144 | 1.1823 | 1.2187 | 0.948  |
| 21.5  | 1.39   | 1.3184 | 1.1906 | 1.3507 | 1.3233 | 1.1933 | 1.2303 | 0.9598 |
| 21.75 | 1.3999 | 1.3289 | 1.2037 | 1.3588 | 1.3311 | 1.2043 | 1.242  | 0.97   |
| 22    | 1.4093 | 1.3395 | 1.2116 | 1.3682 | 1.3419 | 1.2153 | 1.2573 | 0.982  |
| 22.25 | 1.4189 | 1.3493 | 1.2223 | 1.3773 | 1.3499 | 1.2238 | 1.2679 | 0.9932 |
| 22.5  | 1.4278 | 1.3589 | 1.2316 | 1.3848 | 1.3593 | 1.2352 | 1.2787 | 1.0055 |
| 22.75 | 1.4356 | 1.369  | 1.2391 | 1.3936 | 1.3672 | 1.2439 | 1.2905 | 1.0171 |
| 23    | 1.4425 | 1.3781 | 1.2485 | 1.3986 | 1.3751 | 1.2548 | 1.303  | 1.029  |
| 23.25 | 1.4488 | 1.3861 | 1.257  | 1.408  | 1.3846 | 1.2672 | 1.3126 | 1.0407 |
| 23.5  | 1.4527 | 1.3947 | 1.2667 | 1.4109 | 1.3905 | 1.2751 | 1.3241 | 1.0506 |
| 23.75 | 1.4559 | 1.4037 | 1.2752 | 1.4191 | 1.3992 | 1.2847 | 1.3357 | 1.0621 |
| 24    | 1.4583 | 1.4119 | 1.2845 | 1.4245 | 1.4079 | 1.2942 | 1.3453 | 1.0756 |
| 24.25 | 1.4609 | 1.4188 | 1.2937 | 1.4294 | 1.4131 | 1.3017 | 1.3553 | 1.085  |
| 24.5  | 1.4615 | 1.4276 | 1.3014 | 1.4367 | 1.4211 | 1.3099 | 1.367  | 1.0974 |
| 24.75 | 1.4635 | 1.4341 | 1.3101 | 1.4381 | 1.428  | 1.3212 | 1.3743 | 1.1056 |
| 25    | 1.466  | 1.4379 | 1.3177 | 1.4412 | 1.4324 | 1.3252 | 1.3833 | 1.1172 |
| 25.25 | 1.4669 | 1.4431 | 1.3269 | 1.4453 | 1.4386 | 1.3337 | 1.3894 | 1.1273 |
| 25.5  | 1.4687 | 1.4476 | 1.3358 | 1.4465 | 1.4433 | 1.3407 | 1.3984 | 1.1381 |
| 25.75 | 1.4687 | 1.4518 | 1.345  | 1.4501 | 1.4469 | 1.3482 | 1.4055 | 1.1482 |
| 26    | 1.4682 | 1.453  | 1.3526 | 1.4443 | 1.4445 | 1.3483 | 1.4057 | 1.1506 |
| 26.25 | 1.4704 | 1.4557 | 1.3577 | 1.4449 | 1.4462 | 1.3533 | 1.4116 | 1.16   |
| 26.5  | 1.4702 | 1.4595 | 1.368  | 1.4448 | 1.447  | 1.3605 | 1.4181 | 1.1694 |
| 26.75 | 1.4706 | 1.4619 | 1.3756 | 1.445  | 1.4497 | 1.3655 | 1.4227 | 1.1807 |
| 27    | 1.4716 | 1.4639 | 1.3808 | 1.4454 | 1.4527 | 1.3722 | 1.4277 | 1.1918 |
| 27.25 | 1.4725 | 1.4677 | 1.3894 | 1.4443 | 1.455  | 1.3777 | 1.4337 | 1.2007 |
| 27.5  | 1.473  | 1.4709 | 1.396  | 1.4447 | 1.4576 | 1.3821 | 1.4376 | 1.2116 |
| 27.75 | 1.4747 | 1.4735 | 1.4025 | 1.4444 | 1.4586 | 1.3887 | 1.4422 | 1.222  |
| 28    | 1.4747 | 1.4758 | 1.4095 | 1.444  | 1.4585 | 1.3916 | 1.4476 | 1.2314 |
| 28.25 | 1.4772 | 1.4784 | 1.4156 | 1.4443 | 1.4626 | 1.398  | 1.4482 | 1.2428 |
| 28.5  | 1.4758 | 1.4806 | 1.4201 | 1.4446 | 1.4642 | 1.4039 | 1.4495 | 1.2542 |
| 28.75 | 1.4763 | 1.4813 | 1.4239 | 1.4441 | 1.464  | 1.4071 | 1.4522 | 1.2644 |

|       |        |        |        |        |        |        |        |        |
|-------|--------|--------|--------|--------|--------|--------|--------|--------|
| 29    | 1.4771 | 1.4829 | 1.4289 | 1.4459 | 1.4661 | 1.4114 | 1.4535 | 1.2766 |
| 29.25 | 1.4786 | 1.485  | 1.4341 | 1.4443 | 1.4696 | 1.4134 | 1.4541 | 1.2854 |
| 29.5  | 1.4803 | 1.4861 | 1.4367 | 1.4448 | 1.4671 | 1.416  | 1.4541 | 1.2953 |
| 29.75 | 1.4807 | 1.4866 | 1.4387 | 1.4446 | 1.4677 | 1.4185 | 1.4549 | 1.3055 |
| 30    | 1.4823 | 1.4892 | 1.4412 | 1.4494 | 1.4704 | 1.4206 | 1.4547 | 1.3137 |
| 30.25 | 1.4831 | 1.49   | 1.4444 | 1.4417 | 1.4584 | 1.4119 | 1.4443 | 1.315  |
| 30.5  | 1.4829 | 1.4913 | 1.4444 | 1.4394 | 1.46   | 1.4111 | 1.443  | 1.3218 |
| 30.75 | 1.4823 | 1.4923 | 1.4446 | 1.4382 | 1.4597 | 1.4114 | 1.4412 | 1.3288 |
| 31    | 1.4825 | 1.4929 | 1.4466 | 1.4379 | 1.46   | 1.4134 | 1.4408 | 1.3357 |
| 31.25 | 1.4843 | 1.4939 | 1.448  | 1.4386 | 1.4628 | 1.4141 | 1.4418 | 1.3453 |
| 31.5  | 1.4842 | 1.496  | 1.4475 | 1.4389 | 1.4622 | 1.4164 | 1.4423 | 1.3524 |
| 31.75 | 1.4837 | 1.4956 | 1.4475 | 1.4387 | 1.4674 | 1.4183 | 1.4429 | 1.3609 |
| 32    | 1.4837 | 1.4964 | 1.4488 | 1.439  | 1.4666 | 1.42   | 1.4426 | 1.37   |
| 32.25 | 1.4847 | 1.4969 | 1.4483 | 1.4394 | 1.4676 | 1.4199 | 1.4432 | 1.3755 |
| 32.5  | 1.4848 | 1.4964 | 1.448  | 1.4395 | 1.4674 | 1.4218 | 1.4436 | 1.3845 |
| 32.75 | 1.4858 | 1.4974 | 1.448  | 1.4371 | 1.4686 | 1.4232 | 1.4453 | 1.3899 |
| 33    | 1.4867 | 1.4992 | 1.4467 | 1.4382 | 1.469  | 1.4251 | 1.4449 | 1.3955 |
| 33.25 | 1.4876 | 1.498  | 1.4476 | 1.4384 | 1.4688 | 1.4268 | 1.4446 | 1.4004 |
| 33.5  | 1.4885 | 1.4993 | 1.4481 | 1.4395 | 1.4694 | 1.4298 | 1.4444 | 1.406  |
| 33.75 | 1.4883 | 1.4994 | 1.4469 | 1.4388 | 1.4687 | 1.4281 | 1.4436 | 1.4115 |
| 34    | 1.4888 | 1.4988 | 1.4474 | 1.4393 | 1.4711 | 1.4312 | 1.4442 | 1.4168 |
| 34.25 | 1.4892 | 1.4995 | 1.4471 | 1.4375 | 1.4718 | 1.4321 | 1.4446 | 1.4196 |
| 34.5  | 1.4899 | 1.4996 | 1.4474 | 1.4386 | 1.4711 | 1.4337 | 1.4442 | 1.4236 |
| 34.75 | 1.4919 | 1.5003 | 1.4472 | 1.4381 | 1.4727 | 1.4337 | 1.4448 | 1.4256 |
| 35    | 1.492  | 1.5014 | 1.4486 | 1.4376 | 1.4719 | 1.4348 | 1.4438 | 1.4277 |
| 35.25 | 1.4922 | 1.502  | 1.4486 | 1.4374 | 1.4739 | 1.433  | 1.4446 | 1.4301 |
| 35.5  | 1.4933 | 1.5004 | 1.4477 | 1.4393 | 1.4734 | 1.4357 | 1.4443 | 1.4304 |
| 35.75 | 1.4939 | 1.5019 | 1.4479 | 1.4394 | 1.4741 | 1.437  | 1.4439 | 1.4316 |
| 36    | 1.4951 | 1.5018 | 1.4476 | 1.4367 | 1.473  | 1.4365 | 1.4447 | 1.4304 |
| 36.25 | 1.4965 | 1.5015 | 1.4469 | 1.4368 | 1.4721 | 1.4377 | 1.4437 | 1.4308 |
| 36.5  | 1.4976 | 1.5021 | 1.4473 | 1.4371 | 1.4724 | 1.4388 | 1.444  | 1.4304 |
| 36.75 | 1.4983 | 1.5037 | 1.4481 | 1.4347 | 1.4679 | 1.4363 | 1.44   | 1.4264 |
| 37    | 1.4992 | 1.5034 | 1.4477 | 1.4314 | 1.4642 | 1.4316 | 1.4363 | 1.4198 |
| 37.25 | 1.4997 | 1.504  | 1.449  | 1.4322 | 1.4632 | 1.431  | 1.4355 | 1.4174 |
| 37.5  | 1.5011 | 1.5037 | 1.4489 | 1.4307 | 1.4611 | 1.4315 | 1.4347 | 1.4148 |
| 37.75 | 1.502  | 1.505  | 1.4486 | 1.43   | 1.4635 | 1.4305 | 1.4334 | 1.4136 |
| 38    | 1.5029 | 1.5047 | 1.4475 | 1.4304 | 1.4637 | 1.4298 | 1.4345 | 1.4142 |
| 38.25 | 1.5029 | 1.5046 | 1.449  | 1.4294 | 1.4621 | 1.4295 | 1.4329 | 1.4116 |
| 38.5  | 1.504  | 1.505  | 1.4481 | 1.4309 | 1.4623 | 1.4297 | 1.4322 | 1.4111 |
| 38.75 | 1.5035 | 1.5042 | 1.448  | 1.4312 | 1.4617 | 1.43   | 1.4344 | 1.4106 |
| 39    | 1.5042 | 1.505  | 1.4488 | 1.4313 | 1.4616 | 1.4323 | 1.4327 | 1.4102 |
| 39.25 | 1.5058 | 1.5049 | 1.4482 | 1.431  | 1.4629 | 1.4317 | 1.4343 | 1.4097 |

|       |        |        |        |        |        |        |        |        |
|-------|--------|--------|--------|--------|--------|--------|--------|--------|
| 39.5  | 1.507  | 1.5052 | 1.4485 | 1.4328 | 1.4633 | 1.4353 | 1.4347 | 1.4094 |
| 39.75 | 1.5073 | 1.506  | 1.4484 | 1.431  | 1.4643 | 1.4328 | 1.4349 | 1.4085 |
| 40    | 1.5077 | 1.5062 | 1.4489 | 1.4312 | 1.4641 | 1.4354 | 1.435  | 1.4091 |
| 40.25 | 1.5093 | 1.5063 | 1.4496 | 1.432  | 1.4667 | 1.4345 | 1.4348 | 1.4097 |
| 40.5  | 1.5096 | 1.506  | 1.4489 | 1.4318 | 1.4646 | 1.4334 | 1.4375 | 1.4091 |
| 40.75 | 1.5108 | 1.5059 | 1.4494 | 1.4313 | 1.4637 | 1.4333 | 1.4359 | 1.4105 |
| 41    | 1.5129 | 1.5053 | 1.4485 | 1.4317 | 1.4641 | 1.432  | 1.436  | 1.4086 |
| 41.25 | 1.5127 | 1.5048 | 1.4491 | 1.4324 | 1.4659 | 1.4338 | 1.4359 | 1.4081 |
| 41.5  | 1.513  | 1.5052 | 1.4495 | 1.4317 | 1.4662 | 1.4327 | 1.4372 | 1.4075 |
| 41.75 | 1.513  | 1.5045 | 1.4496 | 1.4307 | 1.4661 | 1.4339 | 1.4359 | 1.4085 |
| 42    | 1.5143 | 1.506  | 1.4492 | 1.4327 | 1.4651 | 1.433  | 1.4363 | 1.407  |
| 42.25 | 1.5164 | 1.506  | 1.4512 | 1.4311 | 1.4672 | 1.432  | 1.4372 | 1.4087 |
| 42.5  | 1.5166 | 1.5062 | 1.4516 | 1.431  | 1.465  | 1.4335 | 1.4371 | 1.4083 |
| 42.75 | 1.518  | 1.506  | 1.4518 | 1.4312 | 1.4664 | 1.4321 | 1.4367 | 1.4097 |
| 43    | 1.5154 | 1.5053 | 1.4522 | 1.4313 | 1.4653 | 1.4346 | 1.4381 | 1.4098 |
| 43.25 | 1.5129 | 1.5059 | 1.4522 | 1.431  | 1.4641 | 1.4336 | 1.4359 | 1.4097 |
| 43.5  | 1.5111 | 1.5064 | 1.4527 | 1.4318 | 1.4644 | 1.4337 | 1.4372 | 1.4089 |
| 43.75 | 1.5114 | 1.5084 | 1.453  | 1.4325 | 1.4663 | 1.4352 | 1.4379 | 1.4115 |
| 44    | 1.5125 | 1.5078 | 1.4529 | 1.4317 | 1.4683 | 1.4353 | 1.4387 | 1.4101 |
| 44.25 | 1.5102 | 1.5073 | 1.4529 | 1.432  | 1.465  | 1.4363 | 1.4367 | 1.4102 |
| 44.5  | 1.5105 | 1.5065 | 1.4523 | 1.4329 | 1.4636 | 1.435  | 1.4379 | 1.4106 |
| 44.75 | 1.5104 | 1.5065 | 1.454  | 1.4333 | 1.4635 | 1.4357 | 1.438  | 1.4128 |
| 45    | 1.5092 | 1.5064 | 1.4543 | 1.4325 | 1.4633 | 1.4346 | 1.4384 | 1.4114 |
| 45.25 | 1.5105 | 1.5057 | 1.4541 | 1.4327 | 1.4641 | 1.4364 | 1.4388 | 1.4108 |
| 45.5  | 1.5103 | 1.5065 | 1.4557 | 1.4326 | 1.4641 | 1.435  | 1.4389 | 1.4114 |
| 45.75 | 1.51   | 1.5067 | 1.4559 | 1.4322 | 1.4653 | 1.4326 | 1.4389 | 1.4113 |
| 46    | 1.5108 | 1.5061 | 1.4561 | 1.433  | 1.4651 | 1.4343 | 1.4391 | 1.414  |
| 46.25 | 1.5109 | 1.5064 | 1.456  | 1.4323 | 1.4636 | 1.4347 | 1.4387 | 1.4131 |
| 46.5  | 1.511  | 1.5069 | 1.4571 | 1.4322 | 1.4675 | 1.4338 | 1.4399 | 1.4126 |
| 46.75 | 1.511  | 1.5052 | 1.4577 | 1.4328 | 1.466  | 1.4339 | 1.4396 | 1.4137 |
| 47    | 1.5111 | 1.5059 | 1.4574 | 1.4328 | 1.464  | 1.4338 | 1.4395 | 1.4137 |
| 47.25 | 1.5102 | 1.5042 | 1.4571 | 1.431  | 1.4645 | 1.4344 | 1.4389 | 1.4148 |
| 47.5  | 1.5112 | 1.5044 | 1.4583 | 1.431  | 1.4644 | 1.4333 | 1.4392 | 1.4158 |
| 47.75 | 1.5109 | 1.5036 | 1.4575 | 1.4326 | 1.4632 | 1.4343 | 1.439  | 1.4153 |
| 48    | 1.511  | 1.5046 | 1.4582 | 1.4334 | 1.4648 | 1.4348 | 1.4392 | 1.4167 |
| 48.25 | 1.511  | 1.5042 | 1.4587 | 1.4323 | 1.4642 | 1.4332 | 1.4402 | 1.4184 |
| 48.5  | 1.5111 | 1.504  | 1.4592 | 1.4334 | 1.4637 | 1.4329 | 1.4405 | 1.4167 |
| 48.75 | 1.5107 | 1.5019 | 1.4578 | 1.4333 | 1.4637 | 1.433  | 1.4402 | 1.4173 |
| 49    | 1.5112 | 1.5026 | 1.4586 | 1.4327 | 1.4634 | 1.4316 | 1.4409 | 1.417  |
| 49.25 | 1.5109 | 1.5034 | 1.4604 | 1.4325 | 1.4647 | 1.4316 | 1.441  | 1.4176 |
| 49.5  | 1.5094 | 1.504  | 1.4603 | 1.433  | 1.4654 | 1.4315 | 1.4425 | 1.418  |
| 49.75 | 1.5105 | 1.5038 | 1.4602 | 1.4344 | 1.4662 | 1.4345 | 1.4433 | 1.4198 |

| M6           | M7            | M8            |
|--------------|---------------|---------------|
| <b>RAD 3</b> | <b>RAD 10</b> | <b>RAD 30</b> |
| 0.1847       | 0.1729        | 0.1753        |
| 0.1649       | 0.1599        | 0.1627        |
| 0.1614       | 0.158         | 0.1614        |
| 0.1594       | 0.1567        | 0.1613        |
| 0.1597       | 0.1583        | 0.1617        |
|              |               | 0.1616        |
|              |               | 0.1614        |
|              |               | 0.1624        |
|              |               | 0.1656        |
|              |               | 0.1656        |
|              |               | 0.1669        |
|              |               | 0.1699        |
|              |               | 0.1712        |
|              |               | 0.1729        |
|              |               | 0.1765        |
|              |               | 0.178         |
|              |               | 0.182         |
|              |               | 0.1848        |
|              |               | 0.188         |
|              |               | 0.1912        |
|              |               | 0.1952        |
|              |               | 0.1983        |
|              |               | 0.2022        |
|              |               | 0.206         |
|              |               | 0.2104        |
|              |               | 0.2146        |
|              |               | 0.2197        |
|              |               | 0.2231        |
|              |               | 0.2299        |
|              |               | 0.2327        |
|              |               | 0.2386        |
|              |               | 0.243         |

- ◆ WT
- WT(GA 3)
- ▲ WT(RAD 3)
- × NO DRUG
- \* GA 3uM
- GA 7uM
- + NOVO 100
- NOVO 250
- RAD 3



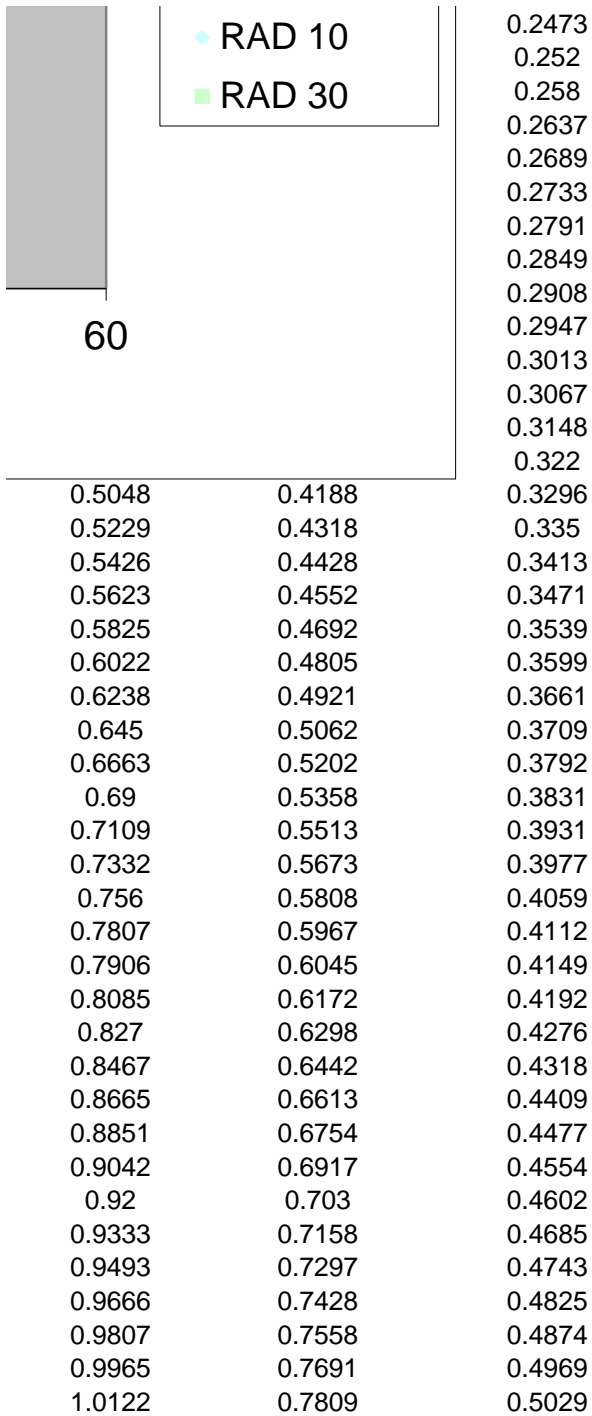

|        |        |        |
|--------|--------|--------|
| 1.0256 | 0.7939 | 0.5115 |
| 1.0397 | 0.8067 | 0.5176 |
| 1.0518 | 0.8154 | 0.5264 |
| 1.0646 | 0.8265 | 0.5327 |
| 1.0759 | 0.8345 | 0.5396 |
| 1.0889 | 0.8472 | 0.5459 |
| 1.0983 | 0.8568 | 0.5558 |
| 1.1124 | 0.8645 | 0.5608 |
| 1.1216 | 0.8741 | 0.5697 |
| 1.1309 | 0.8813 | 0.5745 |
| 1.1419 | 0.8907 | 0.5828 |
| 1.1498 | 0.898  | 0.5893 |
| 1.1609 | 0.905  | 0.5957 |
| 1.1713 | 0.9124 | 0.6049 |
| 1.1779 | 0.9219 | 0.6109 |
| 1.1889 | 0.9283 | 0.6174 |
| 1.1976 | 0.9358 | 0.6234 |
| 1.2057 | 0.9411 | 0.6321 |
| 1.2153 | 0.9476 | 0.6381 |
| 1.2247 | 0.9552 | 0.6457 |
| 1.2321 | 0.9621 | 0.6499 |
| 1.2392 | 0.9689 | 0.6566 |
| 1.2496 | 0.976  | 0.6626 |
| 1.257  | 0.9817 | 0.671  |
| 1.266  | 0.9884 | 0.6775 |
| 1.2741 | 0.9958 | 0.6835 |
| 1.2837 | 1.0024 | 0.686  |
| 1.289  | 1.0089 | 0.6943 |
| 1.2983 | 1.0154 | 0.697  |
| 1.3037 | 1.0223 | 0.7034 |
| 1.3037 | 1.0231 | 0.7044 |
| 1.3099 | 1.0303 | 0.7095 |
| 1.316  | 1.0381 | 0.7135 |
| 1.3224 | 1.0436 | 0.7191 |
| 1.3291 | 1.0503 | 0.7242 |
| 1.3364 | 1.0567 | 0.7285 |
| 1.3417 | 1.0643 | 0.7346 |
| 1.3501 | 1.0721 | 0.7375 |
| 1.3552 | 1.0798 | 0.7424 |
| 1.3629 | 1.0864 | 0.748  |
| 1.3712 | 1.0946 | 0.7543 |
| 1.3764 | 1.103  | 0.7586 |

|        |        |        |
|--------|--------|--------|
| 1.3814 | 1.1109 | 0.7651 |
| 1.3877 | 1.119  | 0.7684 |
| 1.3904 | 1.1287 | 0.7736 |
| 1.3961 | 1.135  | 0.7774 |
| 1.399  | 1.1426 | 0.7833 |
| 1.394  | 1.1436 | 0.7842 |
| 1.3942 | 1.1483 | 0.786  |
| 1.396  | 1.1574 | 0.7916 |
| 1.3952 | 1.1642 | 0.7957 |
| 1.3981 | 1.1688 | 0.8016 |
| 1.3998 | 1.1781 | 0.8082 |
| 1.4009 | 1.1845 | 0.8111 |
| 1.4013 | 1.1923 | 0.8165 |
| 1.4033 | 1.1981 | 0.8216 |
| 1.4038 | 1.2051 | 0.8273 |
| 1.4043 | 1.212  | 0.8322 |
| 1.4038 | 1.2203 | 0.8356 |
| 1.4015 | 1.2247 | 0.8408 |
| 1.4014 | 1.2308 | 0.8468 |
| 1.4025 | 1.2397 | 0.8504 |
| 1.4026 | 1.2471 | 0.854  |
| 1.4024 | 1.2508 | 0.8585 |
| 1.4008 | 1.2567 | 0.8641 |
| 1.4008 | 1.266  | 0.8679 |
| 1.4016 | 1.2704 | 0.8754 |
| 1.4018 | 1.2763 | 0.879  |
| 1.4021 | 1.2808 | 0.8824 |
| 1.4024 | 1.2857 | 0.8868 |
| 1.3995 | 1.2913 | 0.893  |
| 1.4003 | 1.2967 | 0.8974 |
| 1.4009 | 1.3029 | 0.9015 |
| 1.3951 | 1.3058 | 0.9044 |
| 1.3907 | 1.3105 | 0.9065 |
| 1.3895 | 1.3116 | 0.911  |
| 1.3897 | 1.3169 | 0.9132 |
| 1.3885 | 1.3207 | 0.9198 |
| 1.3887 | 1.3244 | 0.926  |
| 1.3876 | 1.3287 | 0.929  |
| 1.3878 | 1.3327 | 0.9351 |
| 1.3888 | 1.3363 | 0.939  |
| 1.3879 | 1.3401 | 0.9452 |
| 1.3886 | 1.3452 | 0.9495 |

|        |        |        |
|--------|--------|--------|
| 1.3875 | 1.3459 | 0.9537 |
| 1.3892 | 1.35   | 0.9587 |
| 1.3899 | 1.3516 | 0.9658 |
| 1.3884 | 1.3534 | 0.9695 |
| 1.3892 | 1.3541 | 0.9741 |
| 1.3882 | 1.3558 | 0.9801 |
| 1.3887 | 1.3549 | 0.9852 |
| 1.3884 | 1.3583 | 0.9867 |
| 1.3887 | 1.357  | 0.9912 |
| 1.3869 | 1.3549 | 0.9964 |
| 1.3877 | 1.3571 | 1.0026 |
| 1.3887 | 1.3559 | 1.0052 |
| 1.3874 | 1.3576 | 1.0103 |
| 1.3879 | 1.3569 | 1.0155 |
| 1.3882 | 1.3574 | 1.0174 |
| 1.3875 | 1.3572 | 1.0234 |
| 1.3863 | 1.358  | 1.0256 |
| 1.3857 | 1.3588 | 1.0321 |
| 1.3867 | 1.3567 | 1.0351 |
| 1.3863 | 1.357  | 1.041  |
| 1.3861 | 1.3585 | 1.0444 |
| 1.3844 | 1.3594 | 1.0485 |
| 1.385  | 1.3586 | 1.0547 |
| 1.3838 | 1.3597 | 1.057  |
| 1.3846 | 1.3579 | 1.0613 |
| 1.3849 | 1.3585 | 1.0658 |
| 1.3842 | 1.3567 | 1.0708 |
| 1.3835 | 1.3568 | 1.0733 |
| 1.3828 | 1.3577 | 1.078  |
| 1.3824 | 1.3589 | 1.0836 |
| 1.3837 | 1.357  | 1.0883 |
| 1.3839 | 1.359  | 1.0938 |
| 1.3829 | 1.3573 | 1.095  |
| 1.3828 | 1.3579 | 1.0983 |
| 1.3845 | 1.3571 | 1.1058 |
| 1.3824 | 1.3578 | 1.1094 |
| 1.3832 | 1.3579 | 1.1125 |
| 1.3829 | 1.3572 | 1.1163 |
| 1.3833 | 1.3591 | 1.1173 |
| 1.3836 | 1.3572 | 1.125  |
| 1.3833 | 1.3578 | 1.129  |
| 1.3831 | 1.3567 | 1.1338 |

HSP 26

L1 L2 L3 L4

| TIME | WT     | WT(GA 3) | WT(RAD 3) | NO DRUG | GA 3uM | GA 7uM | NOVO 100 |
|------|--------|----------|-----------|---------|--------|--------|----------|
| 0    | 0.1894 | 0.2051   | 0.1892    | 0.1669  | 0.1729 | 0.151  | 0.1981   |
| 0.25 | 0.1844 | 0.1929   | 0.1812    | 0.1593  | 0.1631 | 0.1439 | 0.2021   |
| 0.5  | 0.1833 | 0.1912   | 0.1787    | 0.158   | 0.1607 | 0.1417 | 0.1988   |
| 0.75 | 0.1838 | 0.189    | 0.1758    | 0.1576  | 0.1606 | 0.1422 | 0.1976   |
| 1    | 0.1843 | 0.1877   | 0.1818    | 0.1572  | 0.1597 | 0.142  | 0.1974   |
| 1.25 | 0.1867 | 0.1862   | 0.1826    | 0.1584  | 0.1599 | 0.1427 | 0.1979   |

### HSP 26

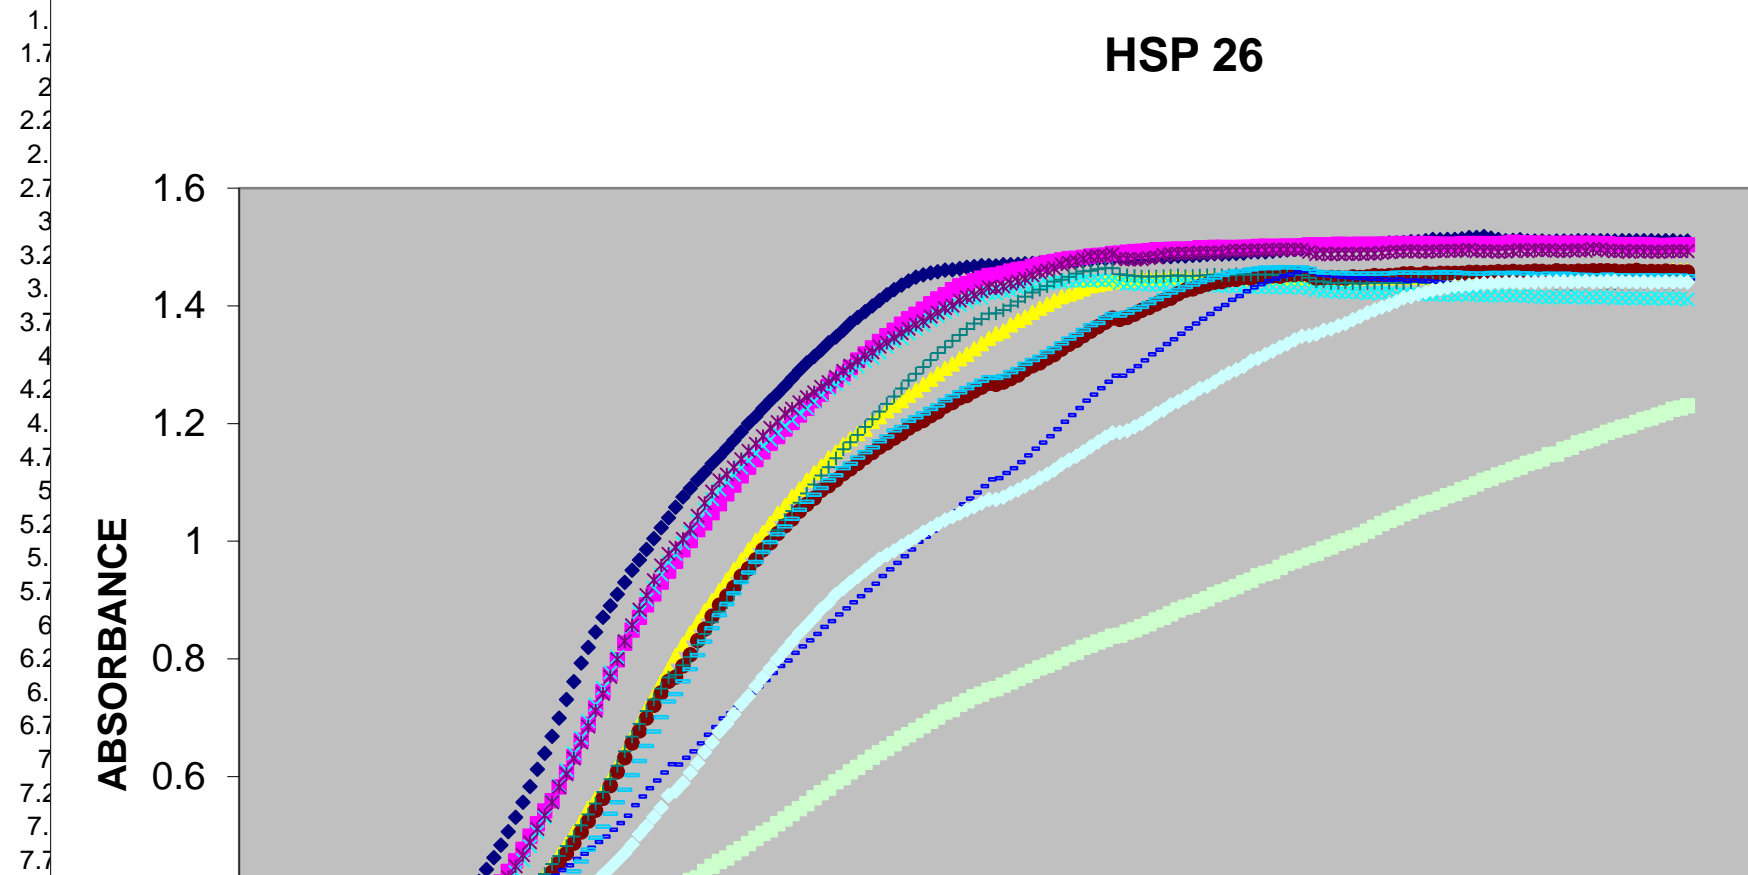

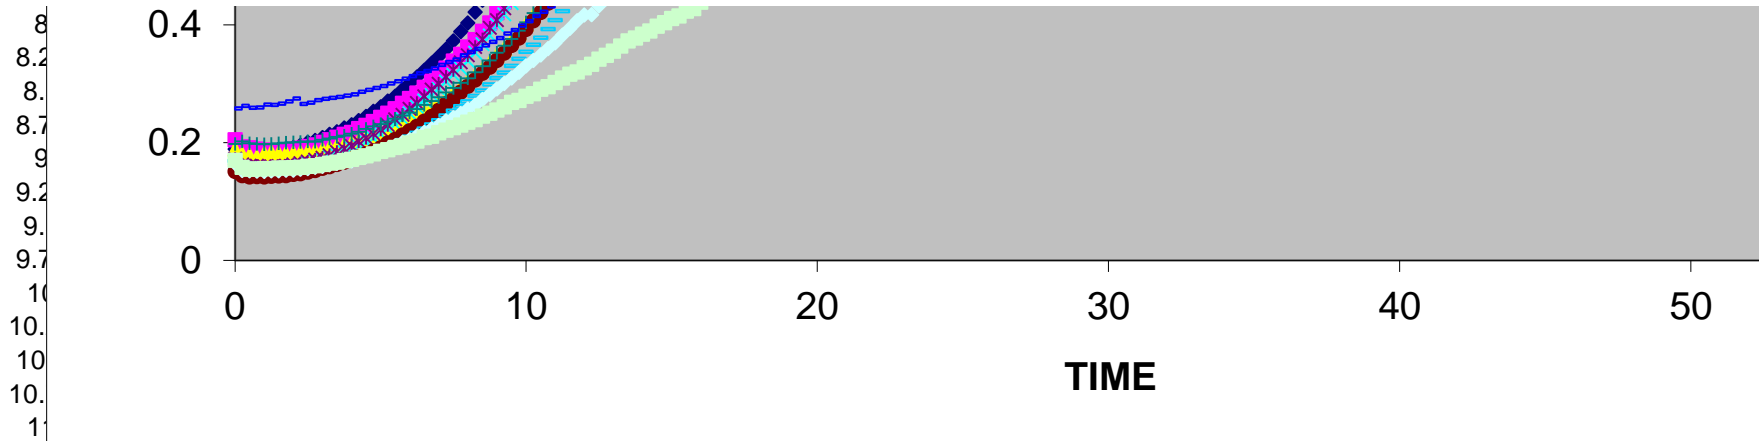

|       |        |        |        |        |        |        |        |
|-------|--------|--------|--------|--------|--------|--------|--------|
| 11.25 | 0.7307 | 0.6075 | 0.4857 | 0.6115 | 0.6042 | 0.4691 | 0.4816 |
| 11.5  | 0.7614 | 0.6339 | 0.5059 | 0.6398 | 0.6306 | 0.4869 | 0.4979 |
| 11.75 | 0.7927 | 0.6618 | 0.5242 | 0.6663 | 0.6583 | 0.5055 | 0.5172 |
| 12    | 0.8194 | 0.6889 | 0.5464 | 0.6944 | 0.6851 | 0.5242 | 0.5357 |
| 12.25 | 0.8459 | 0.7168 | 0.5622 | 0.7225 | 0.7121 | 0.5427 | 0.5544 |
| 12.5  | 0.8706 | 0.7448 | 0.5743 | 0.7503 | 0.7407 | 0.563  | 0.5739 |
| 12.75 | 0.8904 | 0.7744 | 0.5968 | 0.7773 | 0.7696 | 0.5847 | 0.5956 |
| 13    | 0.9099 | 0.7982 | 0.6186 | 0.8031 | 0.7996 | 0.6081 | 0.6181 |
| 13.25 | 0.9301 | 0.8269 | 0.6426 | 0.8298 | 0.8297 | 0.6318 | 0.6429 |
| 13.5  | 0.9508 | 0.849  | 0.6665 | 0.855  | 0.8569 | 0.657  | 0.6679 |
| 13.75 | 0.9679 | 0.8707 | 0.6913 | 0.8792 | 0.8838 | 0.6778 | 0.6898 |
| 14    | 0.986  | 0.8918 | 0.7152 | 0.9008 | 0.9082 | 0.6996 | 0.7112 |
| 14.25 | 1.0047 | 0.9106 | 0.7372 | 0.9212 | 0.9338 | 0.7212 | 0.7308 |
| 14.5  | 1.0233 | 0.9308 | 0.7608 | 0.9438 | 0.9586 | 0.7426 | 0.7496 |
| 14.75 | 1.0397 | 0.9491 | 0.7825 | 0.9645 | 0.9782 | 0.762  | 0.7687 |
| 15    | 1.0577 | 0.966  | 0.8057 | 0.9782 | 0.9895 | 0.7691 | 0.7726 |
| 15.25 | 1.0753 | 0.9853 | 0.8251 | 0.9968 | 1.004  | 0.7883 | 0.7893 |
| 15.5  | 1.0897 | 1.0015 | 0.8439 | 1.0156 | 1.0209 | 0.807  | 0.8034 |
| 15.75 | 1.1049 | 1.0198 | 0.8628 | 1.0349 | 1.0433 | 0.831  | 0.8241 |
| 16    | 1.1171 | 1.031  | 0.8817 | 1.0533 | 1.0648 | 0.8505 | 0.8422 |
| 16.25 | 1.1316 | 1.0487 | 0.8996 | 1.0712 | 1.0846 | 0.8723 | 0.8628 |
| 16.5  | 1.1443 | 1.0637 | 0.9165 | 1.0878 | 1.1034 | 0.8914 | 0.8807 |
| 16.75 | 1.1579 | 1.0806 | 0.9342 | 1.1012 | 1.1135 | 0.9065 | 0.8963 |
| 17    | 1.1715 | 1.0952 | 0.9517 | 1.1127 | 1.1252 | 0.9214 | 0.9106 |
| 17.25 | 1.1858 | 1.1114 | 0.9682 | 1.1254 | 1.1395 | 0.9401 | 0.9303 |
| 17.5  | 1.2004 | 1.1256 | 0.9855 | 1.1372 | 1.1535 | 0.9536 | 0.9476 |
| 17.75 | 1.2123 | 1.1388 | 1.0016 | 1.1495 | 1.1654 | 0.9686 | 0.9662 |
| 18    | 1.2261 | 1.1522 | 1.015  | 1.1623 | 1.1784 | 0.9857 | 0.9839 |
| 18.25 | 1.239  | 1.1664 | 1.0307 | 1.1728 | 1.1928 | 0.9977 | 1.0001 |

|       |        |        |        |        |        |        |        |
|-------|--------|--------|--------|--------|--------|--------|--------|
| 18.5  | 1.251  | 1.1779 | 1.0478 | 1.1846 | 1.2026 | 1.0133 | 1.0188 |
| 18.75 | 1.2641 | 1.1907 | 1.0607 | 1.196  | 1.2173 | 1.0262 | 1.0361 |
| 19    | 1.2773 | 1.2018 | 1.0765 | 1.2064 | 1.2253 | 1.0379 | 1.0512 |
| 19.25 | 1.2907 | 1.2145 | 1.0891 | 1.2184 | 1.2362 | 1.0513 | 1.0655 |
| 19.5  | 1.3032 | 1.2259 | 1.1041 | 1.2266 | 1.245  | 1.0628 | 1.0813 |
| 19.75 | 1.3141 | 1.239  | 1.1166 | 1.2376 | 1.2531 | 1.0731 | 1.0964 |
| 20    | 1.3251 | 1.2497 | 1.1283 | 1.2492 | 1.2622 | 1.0866 | 1.1117 |
| 20.25 | 1.3374 | 1.2637 | 1.1419 | 1.2599 | 1.2708 | 1.0943 | 1.1257 |
| 20.5  | 1.3474 | 1.2743 | 1.1521 | 1.2675 | 1.2792 | 1.1039 | 1.141  |
| 20.75 | 1.3589 | 1.2848 | 1.1637 | 1.277  | 1.2898 | 1.115  | 1.1563 |
| 21    | 1.3704 | 1.2956 | 1.1744 | 1.2872 | 1.2984 | 1.1231 | 1.1681 |
| 21.25 | 1.3806 | 1.3083 | 1.1829 | 1.2968 | 1.3067 | 1.1323 | 1.1807 |
| 21.5  | 1.39   | 1.3184 | 1.1906 | 1.3057 | 1.3156 | 1.1422 | 1.1944 |
| 21.75 | 1.3999 | 1.3289 | 1.2037 | 1.3118 | 1.3209 | 1.1509 | 1.2072 |
| 22    | 1.4093 | 1.3395 | 1.2116 | 1.3208 | 1.331  | 1.16   | 1.2206 |
| 22.25 | 1.4189 | 1.3493 | 1.2223 | 1.3304 | 1.3372 | 1.167  | 1.2333 |
| 22.5  | 1.4278 | 1.3589 | 1.2316 | 1.3396 | 1.3458 | 1.1755 | 1.2462 |
| 22.75 | 1.4356 | 1.369  | 1.2391 | 1.3447 | 1.3536 | 1.1829 | 1.2598 |
| 23    | 1.4425 | 1.3781 | 1.2485 | 1.3535 | 1.3612 | 1.192  | 1.2735 |
| 23.25 | 1.4488 | 1.3861 | 1.257  | 1.3612 | 1.3687 | 1.1994 | 1.2849 |
| 23.5  | 1.4527 | 1.3947 | 1.2667 | 1.3673 | 1.3741 | 1.2051 | 1.2962 |
| 23.75 | 1.4559 | 1.4037 | 1.2752 | 1.3762 | 1.382  | 1.2137 | 1.3079 |
| 24    | 1.4583 | 1.4119 | 1.2845 | 1.3833 | 1.3888 | 1.2202 | 1.3199 |
| 24.25 | 1.4609 | 1.4188 | 1.2937 | 1.389  | 1.3964 | 1.2296 | 1.3299 |
| 24.5  | 1.4615 | 1.4276 | 1.3014 | 1.3946 | 1.4007 | 1.236  | 1.3406 |
| 24.75 | 1.4635 | 1.4341 | 1.3101 | 1.4015 | 1.4093 | 1.244  | 1.3505 |
| 25    | 1.466  | 1.4379 | 1.3177 | 1.407  | 1.4147 | 1.2479 | 1.3611 |
| 25.25 | 1.4669 | 1.4431 | 1.3269 | 1.4124 | 1.4184 | 1.2551 | 1.37   |
| 25.5  | 1.4687 | 1.4476 | 1.3358 | 1.4138 | 1.4248 | 1.2617 | 1.3778 |
| 25.75 | 1.4687 | 1.4518 | 1.345  | 1.4218 | 1.4316 | 1.2684 | 1.3868 |
| 26    | 1.4682 | 1.453  | 1.3526 | 1.4211 | 1.4297 | 1.2665 | 1.3875 |
| 26.25 | 1.4704 | 1.4557 | 1.3577 | 1.4252 | 1.4334 | 1.2705 | 1.3931 |
| 26.5  | 1.4702 | 1.4595 | 1.368  | 1.4264 | 1.4382 | 1.2768 | 1.4007 |
| 26.75 | 1.4706 | 1.4619 | 1.3756 | 1.4304 | 1.4411 | 1.2827 | 1.4075 |
| 27    | 1.4716 | 1.4639 | 1.3808 | 1.4343 | 1.4461 | 1.2918 | 1.4156 |
| 27.25 | 1.4725 | 1.4677 | 1.3894 | 1.436  | 1.4523 | 1.2984 | 1.4228 |
| 27.5  | 1.473  | 1.4709 | 1.396  | 1.4379 | 1.4572 | 1.3032 | 1.4279 |
| 27.75 | 1.4747 | 1.4735 | 1.4025 | 1.4387 | 1.4606 | 1.3115 | 1.4338 |
| 28    | 1.4747 | 1.4758 | 1.4095 | 1.4404 | 1.4643 | 1.3173 | 1.4412 |
| 28.25 | 1.4772 | 1.4784 | 1.4156 | 1.4409 | 1.4705 | 1.3268 | 1.4449 |
| 28.5  | 1.4758 | 1.4806 | 1.4201 | 1.4429 | 1.4733 | 1.335  | 1.4497 |
| 28.75 | 1.4763 | 1.4813 | 1.4239 | 1.4424 | 1.4762 | 1.3414 | 1.4548 |

|       |        |        |        |        |        |        |        |
|-------|--------|--------|--------|--------|--------|--------|--------|
| 29    | 1.4771 | 1.4829 | 1.4289 | 1.4437 | 1.4808 | 1.3497 | 1.459  |
| 29.25 | 1.4786 | 1.485  | 1.4341 | 1.4423 | 1.4846 | 1.3568 | 1.46   |
| 29.5  | 1.4803 | 1.4861 | 1.4367 | 1.4443 | 1.4846 | 1.3649 | 1.4626 |
| 29.75 | 1.4807 | 1.4866 | 1.4387 | 1.4437 | 1.4851 | 1.3724 | 1.4644 |
| 30    | 1.4823 | 1.4892 | 1.4412 | 1.4435 | 1.4883 | 1.3795 | 1.4644 |
| 30.25 | 1.4831 | 1.49   | 1.4444 | 1.4394 | 1.4808 | 1.3774 | 1.454  |
| 30.5  | 1.4829 | 1.4913 | 1.4444 | 1.4377 | 1.4795 | 1.3807 | 1.4525 |
| 30.75 | 1.4823 | 1.4923 | 1.4446 | 1.4379 | 1.4787 | 1.3861 | 1.4509 |
| 31    | 1.4825 | 1.4929 | 1.4466 | 1.4363 | 1.4796 | 1.3922 | 1.45   |
| 31.25 | 1.4843 | 1.4939 | 1.448  | 1.4361 | 1.4815 | 1.3974 | 1.4502 |
| 31.5  | 1.4842 | 1.496  | 1.4475 | 1.436  | 1.4829 | 1.4032 | 1.4503 |
| 31.75 | 1.4837 | 1.4956 | 1.4475 | 1.4359 | 1.4865 | 1.4091 | 1.4506 |
| 32    | 1.4837 | 1.4964 | 1.4488 | 1.4387 | 1.4886 | 1.4132 | 1.4511 |
| 32.25 | 1.4847 | 1.4969 | 1.4483 | 1.4373 | 1.4893 | 1.4206 | 1.4521 |
| 32.5  | 1.4848 | 1.4964 | 1.448  | 1.4375 | 1.4891 | 1.4269 | 1.4508 |
| 32.75 | 1.4858 | 1.4974 | 1.448  | 1.4362 | 1.4898 | 1.4287 | 1.4509 |
| 33    | 1.4867 | 1.4992 | 1.4467 | 1.4349 | 1.4911 | 1.4333 | 1.4518 |
| 33.25 | 1.4876 | 1.498  | 1.4476 | 1.4352 | 1.4908 | 1.4372 | 1.4524 |
| 33.5  | 1.4885 | 1.4993 | 1.4481 | 1.435  | 1.4905 | 1.4405 | 1.4536 |
| 33.75 | 1.4883 | 1.4994 | 1.4469 | 1.4341 | 1.4908 | 1.4416 | 1.4523 |
| 34    | 1.4888 | 1.4988 | 1.4474 | 1.4339 | 1.4937 | 1.4444 | 1.4522 |
| 34.25 | 1.4892 | 1.4995 | 1.4471 | 1.433  | 1.494  | 1.4454 | 1.4538 |
| 34.5  | 1.4899 | 1.4996 | 1.4474 | 1.4335 | 1.4938 | 1.4482 | 1.453  |
| 34.75 | 1.4919 | 1.5003 | 1.4472 | 1.4314 | 1.4949 | 1.4476 | 1.4533 |
| 35    | 1.492  | 1.5014 | 1.4486 | 1.432  | 1.4947 | 1.4494 | 1.4533 |
| 35.25 | 1.4922 | 1.502  | 1.4486 | 1.4319 | 1.4945 | 1.4494 | 1.4532 |
| 35.5  | 1.4933 | 1.5004 | 1.4477 | 1.432  | 1.4958 | 1.451  | 1.4531 |
| 35.75 | 1.4939 | 1.5019 | 1.4479 | 1.4323 | 1.4959 | 1.4508 | 1.453  |
| 36    | 1.4951 | 1.5018 | 1.4476 | 1.4313 | 1.4957 | 1.4533 | 1.4535 |
| 36.25 | 1.4965 | 1.5015 | 1.4469 | 1.432  | 1.4956 | 1.4535 | 1.453  |
| 36.5  | 1.4976 | 1.5021 | 1.4473 | 1.4312 | 1.4958 | 1.4546 | 1.4528 |
| 36.75 | 1.4983 | 1.5037 | 1.4481 | 1.4298 | 1.4918 | 1.4528 | 1.448  |
| 37    | 1.4992 | 1.5034 | 1.4477 | 1.4272 | 1.4882 | 1.4475 | 1.4421 |
| 37.25 | 1.4997 | 1.504  | 1.449  | 1.425  | 1.4893 | 1.4477 | 1.4414 |
| 37.5  | 1.5011 | 1.5037 | 1.4489 | 1.4249 | 1.4877 | 1.4483 | 1.4394 |
| 37.75 | 1.502  | 1.505  | 1.4486 | 1.4239 | 1.4889 | 1.4478 | 1.439  |
| 38    | 1.5029 | 1.5047 | 1.4475 | 1.4233 | 1.4885 | 1.4474 | 1.4395 |
| 38.25 | 1.5029 | 1.5046 | 1.449  | 1.424  | 1.4882 | 1.4494 | 1.4385 |
| 38.5  | 1.504  | 1.505  | 1.4481 | 1.4229 | 1.4886 | 1.4483 | 1.4383 |
| 38.75 | 1.5035 | 1.5042 | 1.448  | 1.4215 | 1.4894 | 1.4494 | 1.4389 |
| 39    | 1.5042 | 1.505  | 1.4488 | 1.4231 | 1.4886 | 1.4515 | 1.439  |
| 39.25 | 1.5058 | 1.5049 | 1.4482 | 1.4222 | 1.4901 | 1.4508 | 1.4387 |



|       |        |        |        |        |        |        |        |
|-------|--------|--------|--------|--------|--------|--------|--------|
| 39.5  | 1.507  | 1.5052 | 1.4485 | 1.4226 | 1.4912 | 1.4518 | 1.4394 |
| 39.75 | 1.5073 | 1.506  | 1.4484 | 1.4209 | 1.4927 | 1.4525 | 1.4397 |
| 40    | 1.5077 | 1.5062 | 1.4489 | 1.4213 | 1.4924 | 1.4543 | 1.4389 |
| 40.25 | 1.5093 | 1.5063 | 1.4496 | 1.4213 | 1.4937 | 1.4547 | 1.4403 |
| 40.5  | 1.5096 | 1.506  | 1.4489 | 1.4206 | 1.4923 | 1.4529 | 1.4414 |
| 40.75 | 1.5108 | 1.5059 | 1.4494 | 1.4198 | 1.4921 | 1.4555 | 1.439  |
| 41    | 1.5129 | 1.5053 | 1.4485 | 1.4193 | 1.4929 | 1.4541 | 1.439  |
| 41.25 | 1.5127 | 1.5048 | 1.4491 | 1.4195 | 1.493  | 1.4555 | 1.4403 |
| 41.5  | 1.513  | 1.5052 | 1.4495 | 1.4184 | 1.494  | 1.4556 | 1.4398 |
| 41.75 | 1.513  | 1.5045 | 1.4496 | 1.4185 | 1.4936 | 1.4554 | 1.4407 |
| 42    | 1.5143 | 1.506  | 1.4492 | 1.42   | 1.4943 | 1.4554 | 1.4392 |
| 42.25 | 1.5164 | 1.506  | 1.4512 | 1.4194 | 1.4959 | 1.4569 | 1.4401 |
| 42.5  | 1.5166 | 1.5062 | 1.4516 | 1.419  | 1.4933 | 1.4573 | 1.4406 |
| 42.75 | 1.518  | 1.506  | 1.4518 | 1.4174 | 1.4937 | 1.4567 | 1.4402 |
| 43    | 1.5154 | 1.5053 | 1.4522 | 1.4178 | 1.4928 | 1.4574 | 1.4389 |
| 43.25 | 1.5129 | 1.5059 | 1.4522 | 1.4182 | 1.4922 | 1.4582 | 1.4396 |
| 43.5  | 1.5111 | 1.5064 | 1.4527 | 1.4184 | 1.4923 | 1.4575 | 1.4389 |
| 43.75 | 1.5114 | 1.5084 | 1.453  | 1.4173 | 1.4935 | 1.4586 | 1.4394 |
| 44    | 1.5125 | 1.5078 | 1.4529 | 1.4176 | 1.4956 | 1.4578 | 1.4399 |
| 44.25 | 1.5102 | 1.5073 | 1.4529 | 1.4168 | 1.4933 | 1.4583 | 1.4382 |
| 44.5  | 1.5105 | 1.5065 | 1.4523 | 1.416  | 1.4951 | 1.4591 | 1.4402 |
| 44.75 | 1.5104 | 1.5065 | 1.454  | 1.4154 | 1.4945 | 1.4588 | 1.4398 |
| 45    | 1.5092 | 1.5064 | 1.4543 | 1.4144 | 1.495  | 1.4579 | 1.4398 |
| 45.25 | 1.5105 | 1.5057 | 1.4541 | 1.4154 | 1.4935 | 1.4598 | 1.4389 |
| 45.5  | 1.5103 | 1.5065 | 1.4557 | 1.4148 | 1.4932 | 1.4587 | 1.4397 |
| 45.75 | 1.51   | 1.5067 | 1.4559 | 1.4152 | 1.4946 | 1.4582 | 1.4374 |
| 46    | 1.5108 | 1.5061 | 1.4561 | 1.4154 | 1.4953 | 1.4595 | 1.4396 |
| 46.25 | 1.5109 | 1.5064 | 1.456  | 1.4138 | 1.4938 | 1.4587 | 1.4395 |
| 46.5  | 1.511  | 1.5069 | 1.4571 | 1.4145 | 1.4969 | 1.46   | 1.4395 |
| 46.75 | 1.511  | 1.5052 | 1.4577 | 1.4146 | 1.4961 | 1.4599 | 1.4384 |
| 47    | 1.5111 | 1.5059 | 1.4574 | 1.4145 | 1.4939 | 1.4599 | 1.4389 |
| 47.25 | 1.5102 | 1.5042 | 1.4571 | 1.4132 | 1.4932 | 1.4595 | 1.4385 |
| 47.5  | 1.5112 | 1.5044 | 1.4583 | 1.4131 | 1.4934 | 1.4582 | 1.4379 |
| 47.75 | 1.5109 | 1.5036 | 1.4575 | 1.4129 | 1.4919 | 1.4594 | 1.4379 |
| 48    | 1.511  | 1.5046 | 1.4582 | 1.4133 | 1.4938 | 1.4602 | 1.4383 |
| 48.25 | 1.511  | 1.5042 | 1.4587 | 1.4131 | 1.4926 | 1.4584 | 1.4385 |
| 48.5  | 1.5111 | 1.504  | 1.4592 | 1.4124 | 1.4927 | 1.4586 | 1.4391 |
| 48.75 | 1.5107 | 1.5019 | 1.4578 | 1.413  | 1.4919 | 1.4581 | 1.4382 |
| 49    | 1.5112 | 1.5026 | 1.4586 | 1.4121 | 1.4926 | 1.4593 | 1.4386 |
| 49.25 | 1.5109 | 1.5034 | 1.4604 | 1.4129 | 1.4931 | 1.458  | 1.4374 |
| 49.5  | 1.5094 | 1.504  | 1.4603 | 1.4126 | 1.4933 | 1.4579 | 1.4394 |
| 49.75 | 1.5105 | 1.5038 | 1.4602 | 1.4111 | 1.4933 | 1.4579 | 1.4397 |

| L5              | L6           | L7            | L8            |
|-----------------|--------------|---------------|---------------|
| <b>NOVO 250</b> | <b>RAD 3</b> | <b>RAD 10</b> | <b>RAD 30</b> |
| 0.2583          | 0.1691       | 0.1647        | 0.1701        |
| 0.2625          | 0.1543       | 0.1525        | 0.1581        |
| 0.2591          | 0.1525       | 0.152         | 0.1548        |
| 0.2596          | 0.1511       | 0.1516        | 0.1554        |
| 0.2648          | 0.1501       | 0.1509        | 0.1561        |
| 0.2644          | 0.1506       | 0.1519        | 0.156         |
|                 |              | 0.1519        | 0.1569        |
|                 |              | 0.153         | 0.1572        |
|                 |              | 0.1532        | 0.1577        |
|                 |              | 0.1548        | 0.1581        |
|                 |              | 0.1562        | 0.1596        |
|                 |              | 0.1584        | 0.1609        |
|                 |              | 0.1597        | 0.1632        |
|                 |              | 0.1626        | 0.165         |
|                 |              | 0.1649        | 0.1668        |
|                 |              | 0.168         | 0.1695        |
|                 |              | 0.1692        | 0.172         |
|                 |              | 0.1744        | 0.1752        |
|                 |              | 0.1768        | 0.178         |
|                 |              | 0.1821        | 0.1811        |
|                 |              | 0.1853        | 0.1854        |
|                 |              | 0.1898        | 0.1878        |
|                 |              | 0.1945        | 0.1916        |
|                 |              | 0.2005        | 0.1948        |
|                 |              | 0.2051        | 0.1994        |
|                 |              | 0.2117        | 0.203         |
|                 |              | 0.2174        | 0.2085        |
|                 |              | 0.2233        | 0.2111        |
|                 |              | 0.2295        | 0.2168        |
|                 |              | 0.2369        | 0.2214        |
|                 |              | 0.2427        | 0.2256        |
|                 |              | 0.2496        | 0.23          |

- ◆ WT
- WT(GA 3)
- ▲ WT(RAD 3)
- × NO DRUG
- × GA 3uM
- GA 7uM
- + NOVO 100
- NOVO 250
- RAD 3

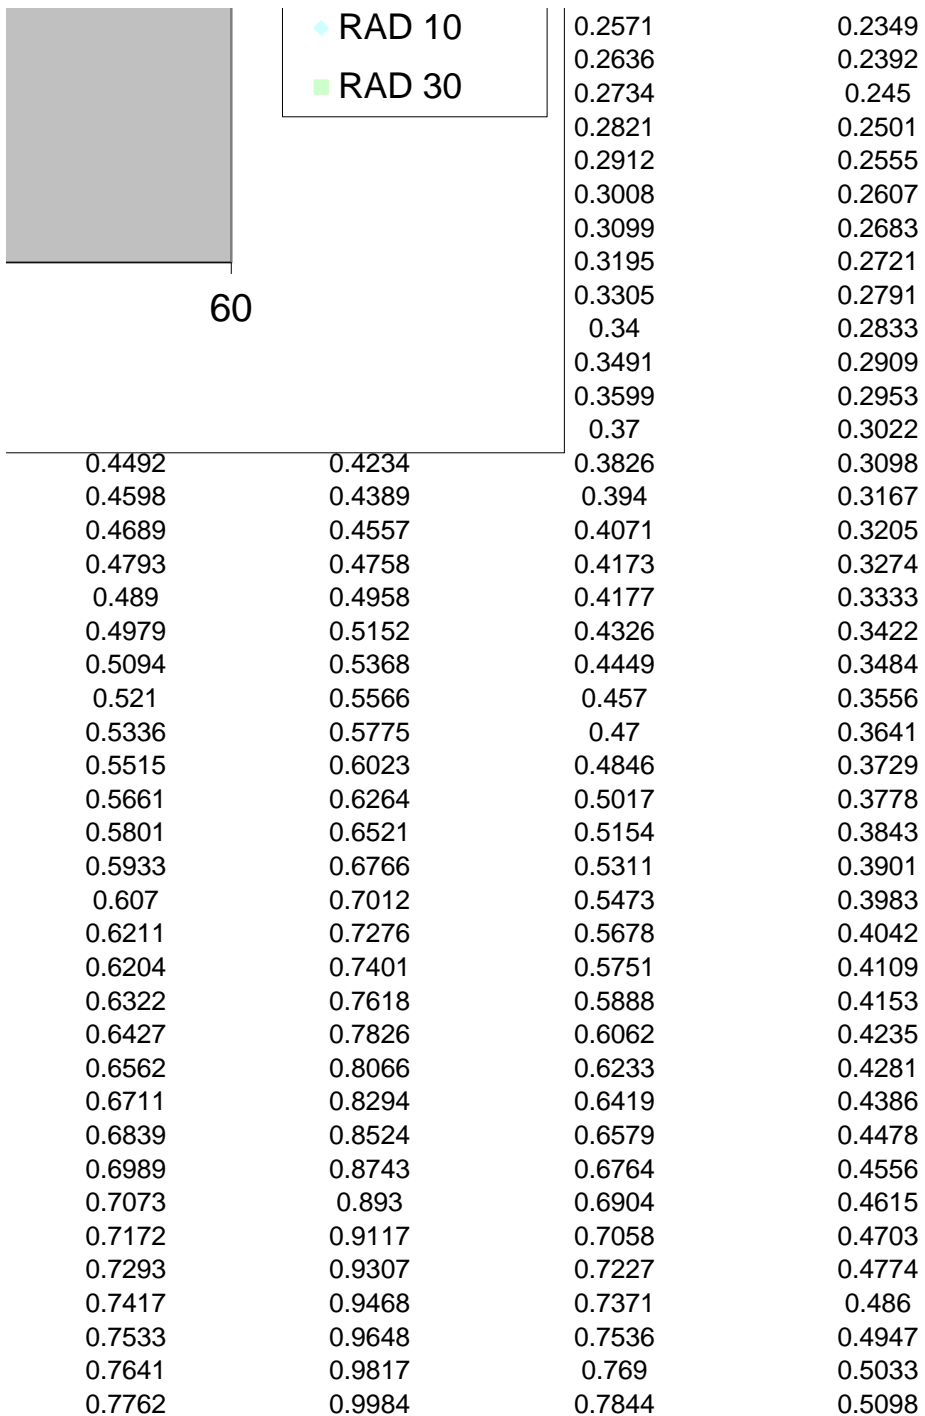

|        |        |        |        |
|--------|--------|--------|--------|
| 0.7878 | 1.0122 | 0.7999 | 0.52   |
| 0.7974 | 1.025  | 0.8149 | 0.5281 |
| 0.8102 | 1.0385 | 0.8293 | 0.5375 |
| 0.821  | 1.0535 | 0.844  | 0.5456 |
| 0.8315 | 1.0672 | 0.8569 | 0.5541 |
| 0.8426 | 1.0789 | 0.8703 | 0.5641 |
| 0.8542 | 1.0907 | 0.8843 | 0.5725 |
| 0.8644 | 1.1034 | 0.8953 | 0.5803 |
| 0.8759 | 1.112  | 0.91   | 0.5914 |
| 0.8858 | 1.1244 | 0.9195 | 0.5983 |
| 0.8963 | 1.1321 | 0.9299 | 0.6079 |
| 0.9068 | 1.142  | 0.9396 | 0.6156 |
| 0.9169 | 1.1513 | 0.9501 | 0.6244 |
| 0.9279 | 1.1596 | 0.96   | 0.6329 |
| 0.9407 | 1.1701 | 0.9695 | 0.6404 |
| 0.9526 | 1.178  | 0.9766 | 0.6479 |
| 0.9633 | 1.1882 | 0.9837 | 0.656  |
| 0.9748 | 1.1946 | 0.9919 | 0.6649 |
| 0.9858 | 1.2047 | 0.9992 | 0.6709 |
| 0.9991 | 1.2107 | 1.007  | 0.6788 |
| 1.0079 | 1.2172 | 1.0153 | 0.6861 |
| 1.0184 | 1.2246 | 1.0217 | 0.6942 |
| 1.0291 | 1.231  | 1.0291 | 0.7011 |
| 1.0412 | 1.2393 | 1.0363 | 0.7097 |
| 1.0506 | 1.2465 | 1.0418 | 0.7143 |
| 1.0626 | 1.2529 | 1.0475 | 0.723  |
| 1.0725 | 1.2602 | 1.0533 | 0.7287 |
| 1.083  | 1.2662 | 1.0583 | 0.7361 |
| 1.0937 | 1.2729 | 1.0651 | 0.7402 |
| 1.1052 | 1.2789 | 1.0709 | 0.7466 |
| 1.1071 | 1.2777 | 1.071  | 0.7496 |
| 1.1162 | 1.2808 | 1.0746 | 0.7552 |
| 1.1245 | 1.2872 | 1.0817 | 0.7606 |
| 1.1347 | 1.2929 | 1.087  | 0.7667 |
| 1.1461 | 1.3018 | 1.0937 | 0.7724 |
| 1.1576 | 1.3081 | 1.099  | 0.7788 |
| 1.1676 | 1.3136 | 1.1071 | 0.7848 |
| 1.1789 | 1.3217 | 1.1139 | 0.7893 |
| 1.1904 | 1.3283 | 1.121  | 0.7946 |
| 1.2029 | 1.3365 | 1.1305 | 0.8011 |
| 1.2143 | 1.3444 | 1.1377 | 0.8077 |
| 1.2267 | 1.3508 | 1.1444 | 0.8117 |

|        |        |        |        |
|--------|--------|--------|--------|
| 1.2388 | 1.3591 | 1.152  | 0.8195 |
| 1.2494 | 1.3674 | 1.1608 | 0.8233 |
| 1.2603 | 1.3712 | 1.1688 | 0.8287 |
| 1.2709 | 1.3799 | 1.1769 | 0.8332 |
| 1.2815 | 1.3862 | 1.1842 | 0.8388 |
| 1.2814 | 1.3835 | 1.1849 | 0.8404 |
| 1.2898 | 1.3888 | 1.1881 | 0.8457 |
| 1.2976 | 1.3939 | 1.1944 | 0.8496 |
| 1.3077 | 1.3986 | 1.2005 | 0.8547 |
| 1.318  | 1.4048 | 1.2086 | 0.86   |
| 1.3255 | 1.4116 | 1.2174 | 0.8662 |
| 1.3351 | 1.4173 | 1.2233 | 0.871  |
| 1.3432 | 1.4226 | 1.2317 | 0.8769 |
| 1.3525 | 1.4272 | 1.2373 | 0.8833 |
| 1.3617 | 1.4319 | 1.2446 | 0.8884 |
| 1.3701 | 1.4364 | 1.2514 | 0.8916 |
| 1.3782 | 1.4408 | 1.2595 | 0.8975 |
| 1.3864 | 1.4439 | 1.2637 | 0.9024 |
| 1.3949 | 1.4487 | 1.2713 | 0.9094 |
| 1.4019 | 1.4526 | 1.2792 | 0.9136 |
| 1.4105 | 1.4564 | 1.286  | 0.918  |
| 1.4169 | 1.4587 | 1.2915 | 0.9227 |
| 1.4252 | 1.4595 | 1.297  | 0.9293 |
| 1.4315 | 1.4618 | 1.3064 | 0.9339 |
| 1.4372 | 1.4635 | 1.3107 | 0.9414 |
| 1.4427 | 1.4654 | 1.3172 | 0.9454 |
| 1.4463 | 1.464  | 1.3235 | 0.9487 |
| 1.4507 | 1.4659 | 1.3297 | 0.9557 |
| 1.4534 | 1.4656 | 1.3354 | 0.9626 |
| 1.4576 | 1.4655 | 1.3422 | 0.9666 |
| 1.4602 | 1.4651 | 1.3486 | 0.9712 |
| 1.4573 | 1.4633 | 1.3495 | 0.9762 |
| 1.4531 | 1.4583 | 1.3521 | 0.9795 |
| 1.4522 | 1.4565 | 1.3586 | 0.9864 |
| 1.4509 | 1.4568 | 1.3608 | 0.9902 |
| 1.4495 | 1.4554 | 1.3661 | 0.9967 |
| 1.4492 | 1.4562 | 1.3703 | 1.0005 |
| 1.4473 | 1.4552 | 1.3767 | 1.0054 |
| 1.4474 | 1.4548 | 1.3822 | 1.0104 |
| 1.4464 | 1.4551 | 1.3887 | 1.017  |
| 1.446  | 1.455  | 1.3932 | 1.0234 |
| 1.4454 | 1.4552 | 1.398  | 1.0303 |

|        |        |        |        |
|--------|--------|--------|--------|
| 1.4447 | 1.4555 | 1.402  | 1.0353 |
| 1.4452 | 1.4568 | 1.4078 | 1.0401 |
| 1.443  | 1.4568 | 1.4135 | 1.047  |
| 1.4437 | 1.4567 | 1.416  | 1.0512 |
| 1.4425 | 1.4566 | 1.4204 | 1.0583 |
| 1.4425 | 1.4561 | 1.4236 | 1.0632 |
| 1.4409 | 1.4564 | 1.4268 | 1.066  |
| 1.4399 | 1.4577 | 1.4287 | 1.0714 |
| 1.4394 | 1.4564 | 1.4313 | 1.0774 |
| 1.4389 | 1.4573 | 1.4332 | 1.081  |
| 1.44   | 1.4558 | 1.4339 | 1.0878 |
| 1.4393 | 1.4557 | 1.4347 | 1.0918 |
| 1.4389 | 1.455  | 1.4363 | 1.0974 |
| 1.4387 | 1.455  | 1.4383 | 1.1034 |
| 1.4377 | 1.4562 | 1.4382 | 1.1067 |
| 1.4381 | 1.456  | 1.4394 | 1.1129 |
| 1.438  | 1.4555 | 1.4396 | 1.1165 |
| 1.4391 | 1.4565 | 1.4401 | 1.1222 |
| 1.4384 | 1.4554 | 1.4393 | 1.126  |
| 1.4371 | 1.4553 | 1.4402 | 1.1323 |
| 1.4366 | 1.454  | 1.4404 | 1.1358 |
| 1.4368 | 1.4544 | 1.4409 | 1.1402 |
| 1.4373 | 1.455  | 1.441  | 1.1471 |
| 1.4376 | 1.4535 | 1.4411 | 1.1482 |
| 1.4382 | 1.4549 | 1.4416 | 1.1561 |
| 1.4381 | 1.4538 | 1.441  | 1.1595 |
| 1.4397 | 1.4529 | 1.4413 | 1.1671 |
| 1.4389 | 1.453  | 1.4419 | 1.1704 |
| 1.4394 | 1.452  | 1.4408 | 1.1747 |
| 1.4394 | 1.452  | 1.4408 | 1.1793 |
| 1.4406 | 1.4531 | 1.4417 | 1.1849 |
| 1.4403 | 1.4514 | 1.4419 | 1.1891 |
| 1.4414 | 1.4523 | 1.4409 | 1.194  |
| 1.442  | 1.4519 | 1.441  | 1.1958 |
| 1.4427 | 1.4509 | 1.4405 | 1.202  |
| 1.443  | 1.4521 | 1.4408 | 1.2069 |
| 1.4419 | 1.4523 | 1.4398 | 1.2094 |
| 1.4429 | 1.4504 | 1.4404 | 1.2146 |
| 1.4427 | 1.4519 | 1.441  | 1.2185 |
| 1.4442 | 1.4515 | 1.4401 | 1.2242 |
| 1.4446 | 1.4517 | 1.4409 | 1.2267 |
| 1.4458 | 1.4507 | 1.4404 | 1.2303 |

HSP 30

| <b>TIME</b> | <b>WT</b> | <b>WT(GA 3)</b> | <b>WT(RAD 3)</b> | <b>F1<br/>NO DRUG</b> | <b>F2<br/>GA 3uM</b> | <b>F3<br/>GA 7uM</b> | <b>F4<br/>NOVO 100</b> | <b>F5<br/>NOVO 250</b> |
|-------------|-----------|-----------------|------------------|-----------------------|----------------------|----------------------|------------------------|------------------------|
| 0           | 0.1894    | 0.2051          | 0.1892           | 0.1645                | 0.1668               | 0.1504               | 0.2004                 | 0.2482                 |
| 0.25        | 0.1844    | 0.1929          | 0.1812           | 0.1574                | 0.1586               | 0.1456               | 0.2016                 | 0.2496                 |
| 0.5         | 0.1833    | 0.1912          | 0.1787           | 0.1555                | 0.1576               | 0.1438               | 0.2033                 | 0.2508                 |
| 0.75        | 0.1838    | 0.189           | 0.1758           | 0.1516                | 0.1554               | 0.142                | 0.203                  | 0.2504                 |
| 1           | 0.1843    | 0.1877          | 0.1818           | 0.1518                | 0.1552               | 0.1416               | 0.203                  | 0.2503                 |
| 1.25        | 0.1867    | 0.1862          | 0.1836           | 0.1528                | 0.156                | 0.1424               | 0.2036                 | 0.2509                 |
| 1.5         | 0.188     | 0.186           | 0.1823           | 0.1526                | 0.1559               | 0.1427               | 0.2044                 | 0.2488                 |
| 1.75        | 0.1903    | 0.1872          | 0.1822           | 0.1544                | 0.1569               | 0.1429               | 0.2033                 | 0.245                  |
| 2           | 0.192     | 0.1886          | 0.1825           | 0.1564                | 0.1591               | 0.1442               | 0.2037                 | 0.2404                 |
| 2.25        | 0.1957    | 0.1907          | 0.183            | 0.159                 | 0.1622               | 0.1455               | 0.205                  | 0.2449                 |
| 2.5         | 0.2004    | 0.1934          | 0.1852           | 0.1608                | 0.1653               | 0.1471               | 0.2055                 | 0.2533                 |
| 2.75        | 0.2037    | 0.1962          | 0.1859           | 0.1643                | 0.1683               | 0.1497               | 0.2069                 | 0.2457                 |
| 3           | 0.2089    | 0.2008          | 0.1881           | 0.1667                | 0.1715               | 0.1525               | 0.2088                 | 0.2484                 |
| 3.25        | 0.2141    | 0.2049          | 0.1915           | 0.1712                | 0.1748               | 0.1548               | 0.2108                 | 0.2519                 |
| 3.5         | 0.2184    | 0.2094          | 0.1939           | 0.1746                | 0.179                | 0.1578               | 0.2127                 | 0.2531                 |
| 3.75        | 0.2248    | 0.2143          | 0.1968           | 0.1795                | 0.1829               | 0.161                | 0.2142                 | 0.255                  |
| 4           | 0.2306    | 0.2174          | 0.1995           | 0.1852                | 0.1883               | 0.1641               | 0.2171                 | 0.2575                 |
| 4.25        | 0.2378    | 0.2238          | 0.2034           | 0.1915                | 0.1939               | 0.168                | 0.2198                 | 0.2607                 |
| 4.5         | 0.2448    | 0.2295          | 0.2074           | 0.1967                | 0.2004               | 0.1719               | 0.2228                 | 0.2637                 |
| 4.75        | 0.2535    | 0.2362          | 0.2119           | 0.204                 | 0.2064               | 0.177                | 0.2273                 | 0.2666                 |
| 5           | 0.2609    | 0.2431          | 0.2166           | 0.2114                | 0.2131               | 0.1816               | 0.2308                 | 0.27                   |
| 5.25        | 0.2706    | 0.2502          | 0.2215           | 0.2193                | 0.2208               | 0.1865               | 0.235                  | 0.2734                 |
| 5.5         | 0.279     | 0.2579          | 0.2282           | 0.2263                | 0.2287               | 0.192                | 0.2391                 | 0.2764                 |
| 5.75        | 0.2906    | 0.2668          | 0.2331           | 0.2352                | 0.2362               | 0.1987               | 0.2446                 | 0.281                  |
| 6           | 0.3005    | 0.2752          | 0.2393           | 0.2449                | 0.2457               | 0.2043               | 0.25                   | 0.2846                 |
| 6.25        | 0.3115    | 0.2844          | 0.2456           | 0.2548                | 0.2542               | 0.211                | 0.2554                 | 0.2879                 |
| 6.5         | 0.3229    | 0.2943          | 0.2526           | 0.2648                | 0.2648               | 0.2172               | 0.261                  | 0.293                  |
| 6.75        | 0.3352    | 0.3045          | 0.2599           | 0.2753                | 0.2751               | 0.2243               | 0.2678                 | 0.2978                 |
| 7           | 0.3463    | 0.3143          | 0.2686           | 0.2859                | 0.2836               | 0.2328               | 0.2742                 | 0.3026                 |
| 7.25        | 0.3591    | 0.3268          | 0.2761           | 0.2969                | 0.2981               | 0.2405               | 0.2827                 | 0.307                  |
| 7.5         | 0.3732    | 0.3388          | 0.2851           | 0.3093                | 0.309                | 0.2484               | 0.2902                 | 0.3115                 |
| 7.75        | 0.3887    | 0.35            | 0.2949           | 0.3221                | 0.3209               | 0.2593               | 0.2987                 | 0.3177                 |
| 8           | 0.4036    | 0.3629          | 0.3046           | 0.3342                | 0.3321               | 0.2667               | 0.3064                 | 0.323                  |
| 8.25        | 0.4219    | 0.3754          | 0.3143           | 0.3487                | 0.3447               | 0.2761               | 0.3146                 | 0.3272                 |

|       |        |        |        |        |        |        |        |        |
|-------|--------|--------|--------|--------|--------|--------|--------|--------|
| 8.5   | 0.4422 | 0.3893 | 0.3245 | 0.3635 | 0.3571 | 0.2857 | 0.3248 | 0.3332 |
| 8.75  | 0.4622 | 0.4037 | 0.3361 | 0.3802 | 0.3726 | 0.2964 | 0.3348 | 0.3395 |
| 9     | 0.4835 | 0.4208 | 0.3492 | 0.3977 | 0.3882 | 0.3066 | 0.3449 | 0.346  |
| 9.25  | 0.5065 | 0.4388 | 0.36   | 0.4166 | 0.4063 | 0.3178 | 0.3563 | 0.3531 |
| 9.5   | 0.5309 | 0.457  | 0.3738 | 0.436  | 0.4229 | 0.3293 | 0.3674 | 0.36   |
| 9.75  | 0.5562 | 0.4763 | 0.3865 | 0.458  | 0.4414 | 0.3412 | 0.3808 | 0.3674 |
| 10    | 0.5829 | 0.4986 | 0.4011 | 0.4808 | 0.462  | 0.3538 | 0.394  | 0.3738 |
| 10.25 | 0.6122 | 0.5197 | 0.416  | 0.5049 | 0.4832 | 0.3653 | 0.408  | 0.3816 |
| 10.5  | 0.6397 | 0.5418 | 0.4316 | 0.5296 | 0.5057 | 0.3782 | 0.422  | 0.3899 |
| 10.75 | 0.6685 | 0.5593 | 0.4497 | 0.5552 | 0.5259 | 0.393  | 0.4369 | 0.3976 |
| 11    | 0.6992 | 0.5825 | 0.4678 | 0.5837 | 0.5501 | 0.4087 | 0.4516 | 0.4056 |
| 11.25 | 0.7307 | 0.6075 | 0.4857 | 0.6093 | 0.5734 | 0.4186 | 0.4505 | 0.4145 |
| 11.5  | 0.7614 | 0.6339 | 0.5059 | 0.6379 | 0.5983 | 0.4346 | 0.469  | 0.4237 |
| 11.75 | 0.7927 | 0.6618 | 0.5242 | 0.6639 | 0.6257 | 0.4523 | 0.4873 | 0.432  |
| 12    | 0.8194 | 0.6889 | 0.5464 | 0.6905 | 0.6522 | 0.4713 | 0.5054 | 0.4376 |
| 12.25 | 0.8459 | 0.7168 | 0.5622 | 0.7182 | 0.6855 | 0.4928 | 0.528  | 0.4477 |
| 12.5  | 0.8706 | 0.7448 | 0.5743 | 0.7437 | 0.7166 | 0.5136 | 0.5527 | 0.4578 |
| 12.75 | 0.8904 | 0.7744 | 0.5968 | 0.7679 | 0.744  | 0.5337 | 0.5765 | 0.4686 |
| 13    | 0.9099 | 0.7982 | 0.6186 | 0.793  | 0.7706 | 0.5558 | 0.6011 | 0.4788 |
| 13.25 | 0.9301 | 0.8269 | 0.6426 | 0.8159 | 0.7961 | 0.5736 | 0.6244 | 0.4947 |
| 13.5  | 0.9508 | 0.849  | 0.6665 | 0.838  | 0.8171 | 0.5919 | 0.6451 | 0.5127 |
| 13.75 | 0.9679 | 0.8707 | 0.6913 | 0.8591 | 0.8389 | 0.6103 | 0.6656 | 0.5284 |
| 14    | 0.986  | 0.8918 | 0.7152 | 0.8792 | 0.8614 | 0.6313 | 0.6899 | 0.5456 |
| 14.25 | 1.0047 | 0.9106 | 0.7372 | 0.9013 | 0.885  | 0.6518 | 0.715  | 0.5614 |
| 14.5  | 1.0233 | 0.9308 | 0.7608 | 0.9223 | 0.905  | 0.6747 | 0.7361 | 0.5753 |
| 14.75 | 1.0397 | 0.9491 | 0.7825 | 0.9415 | 0.9266 | 0.6942 | 0.7575 | 0.5878 |
| 15    | 1.0577 | 0.966  | 0.8057 | 0.9604 | 0.9482 | 0.7167 | 0.7779 | 0.6006 |
| 15.25 | 1.0753 | 0.9853 | 0.8251 | 0.9761 | 0.9674 | 0.7369 | 0.7976 | 0.6149 |
| 15.5  | 1.0897 | 1.0015 | 0.8439 | 0.9958 | 0.9861 | 0.7577 | 0.8167 | 0.628  |
| 15.75 | 1.1049 | 1.0198 | 0.8628 | 1.013  | 1.0054 | 0.7784 | 0.8368 | 0.6411 |
| 16    | 1.1171 | 1.031  | 0.8817 | 1.026  | 1.0117 | 0.7828 | 0.8352 | 0.6318 |
| 16.25 | 1.1316 | 1.0487 | 0.8996 | 1.0353 | 1.0157 | 0.7839 | 0.8262 | 0.6277 |
| 16.5  | 1.1443 | 1.0637 | 0.9165 | 1.0511 | 1.031  | 0.8013 | 0.8457 | 0.6418 |
| 16.75 | 1.1579 | 1.0806 | 0.9342 | 1.0648 | 1.0496 | 0.8221 | 0.8709 | 0.6573 |
| 17    | 1.1715 | 1.0952 | 0.9517 | 1.08   | 1.0638 | 0.8384 | 0.8898 | 0.6697 |
| 17.25 | 1.1858 | 1.1114 | 0.9682 | 1.0905 | 1.0762 | 0.857  | 0.9071 | 0.6809 |
| 17.5  | 1.2004 | 1.1256 | 0.9855 | 1.1029 | 1.0916 | 0.8712 | 0.9251 | 0.6906 |
| 17.75 | 1.2123 | 1.1388 | 1.0016 | 1.1149 | 1.1036 | 0.8878 | 0.941  | 0.7028 |
| 18    | 1.2261 | 1.1522 | 1.015  | 1.1277 | 1.1168 | 0.9039 | 0.9604 | 0.7133 |
| 18.25 | 1.239  | 1.1664 | 1.0307 | 1.1388 | 1.1297 | 0.9156 | 0.9782 | 0.7246 |
| 18.5  | 1.251  | 1.1779 | 1.0478 | 1.1523 | 1.1434 | 0.9303 | 0.995  | 0.7357 |
| 18.75 | 1.2641 | 1.1907 | 1.0607 | 1.1627 | 1.1539 | 0.9423 | 1.0133 | 0.7449 |



|       |        |        |        |        |        |        |        |        |
|-------|--------|--------|--------|--------|--------|--------|--------|--------|
| 19    | 1.2773 | 1.2018 | 1.0765 | 1.1715 | 1.1651 | 0.956  | 1.0287 | 0.7563 |
| 19.25 | 1.2907 | 1.2145 | 1.0891 | 1.1827 | 1.176  | 0.9674 | 1.045  | 0.7671 |
| 19.5  | 1.3032 | 1.2259 | 1.1041 | 1.1934 | 1.1857 | 0.9808 | 1.0602 | 0.7763 |
| 19.75 | 1.3141 | 1.239  | 1.1166 | 1.204  | 1.1943 | 0.9923 | 1.0762 | 0.7873 |
| 20    | 1.3251 | 1.2497 | 1.1283 | 1.2152 | 1.2037 | 1.0033 | 1.0898 | 0.7985 |
| 20.25 | 1.3374 | 1.2637 | 1.1419 | 1.2236 | 1.2126 | 1.0143 | 1.1053 | 0.8101 |
| 20.5  | 1.3474 | 1.2743 | 1.1521 | 1.2331 | 1.2228 | 1.0251 | 1.1201 | 0.821  |
| 20.75 | 1.3589 | 1.2848 | 1.1637 | 1.2441 | 1.2317 | 1.0338 | 1.1348 | 0.8314 |
| 21    | 1.3704 | 1.2956 | 1.1744 | 1.2516 | 1.2403 | 1.044  | 1.1483 | 0.8417 |
| 21.25 | 1.3806 | 1.3083 | 1.1829 | 1.2623 | 1.25   | 1.055  | 1.1629 | 0.8519 |
| 21.5  | 1.39   | 1.3184 | 1.1906 | 1.2702 | 1.2574 | 1.0639 | 1.1754 | 0.8625 |
| 21.75 | 1.3999 | 1.3289 | 1.2037 | 1.2799 | 1.2653 | 1.0735 | 1.1887 | 0.8723 |
| 22    | 1.4093 | 1.3395 | 1.2116 | 1.2868 | 1.275  | 1.0821 | 1.204  | 0.8838 |
| 22.25 | 1.4189 | 1.3493 | 1.2223 | 1.2963 | 1.2814 | 1.0913 | 1.2167 | 0.8928 |
| 22.5  | 1.4278 | 1.3589 | 1.2316 | 1.3033 | 1.2909 | 1.0999 | 1.2295 | 0.9047 |
| 22.75 | 1.4356 | 1.369  | 1.2391 | 1.3098 | 1.2964 | 1.1076 | 1.2429 | 0.9148 |
| 23    | 1.4425 | 1.3781 | 1.2485 | 1.318  | 1.304  | 1.1163 | 1.2559 | 0.9258 |
| 23.25 | 1.4488 | 1.3861 | 1.257  | 1.3257 | 1.3125 | 1.1235 | 1.2677 | 0.9363 |
| 23.5  | 1.4527 | 1.3947 | 1.2667 | 1.3332 | 1.3197 | 1.1328 | 1.2799 | 0.9471 |
| 23.75 | 1.4559 | 1.4037 | 1.2752 | 1.3389 | 1.3253 | 1.1397 | 1.2903 | 0.9575 |
| 24    | 1.4583 | 1.4119 | 1.2845 | 1.3457 | 1.335  | 1.1488 | 1.306  | 0.9682 |
| 24.25 | 1.4609 | 1.4188 | 1.2937 | 1.3516 | 1.3424 | 1.1554 | 1.3147 | 0.9782 |
| 24.5  | 1.4615 | 1.4276 | 1.3014 | 1.3557 | 1.3495 | 1.1635 | 1.3268 | 0.9889 |
| 24.75 | 1.4635 | 1.4341 | 1.3101 | 1.3626 | 1.3552 | 1.1729 | 1.3378 | 1.0004 |
| 25    | 1.466  | 1.4379 | 1.3177 | 1.367  | 1.3613 | 1.1773 | 1.3485 | 1.0094 |
| 25.25 | 1.4669 | 1.4431 | 1.3269 | 1.3708 | 1.3678 | 1.1849 | 1.356  | 1.02   |
| 25.5  | 1.4687 | 1.4476 | 1.3358 | 1.3746 | 1.3713 | 1.1917 | 1.3649 | 1.0306 |
| 25.75 | 1.4687 | 1.4518 | 1.345  | 1.3781 | 1.3742 | 1.1998 | 1.3747 | 1.0414 |
| 26    | 1.4682 | 1.453  | 1.3526 | 1.3824 | 1.3812 | 1.2078 | 1.3832 | 1.0503 |
| 26.25 | 1.4704 | 1.4557 | 1.3577 | 1.3844 | 1.3851 | 1.2168 | 1.392  | 1.0614 |
| 26.5  | 1.4702 | 1.4595 | 1.368  | 1.386  | 1.3901 | 1.2214 | 1.4005 | 1.0725 |
| 26.75 | 1.4706 | 1.4619 | 1.3756 | 1.3871 | 1.3944 | 1.2272 | 1.4078 | 1.0828 |
| 27    | 1.4716 | 1.4639 | 1.3808 | 1.3885 | 1.3991 | 1.2371 | 1.4156 | 1.0919 |
| 27.25 | 1.4725 | 1.4677 | 1.3894 | 1.3893 | 1.4025 | 1.2434 | 1.4241 | 1.1032 |
| 27.5  | 1.473  | 1.4709 | 1.396  | 1.3896 | 1.406  | 1.2484 | 1.4309 | 1.1119 |
| 27.75 | 1.4747 | 1.4735 | 1.4025 | 1.3891 | 1.4083 | 1.256  | 1.4372 | 1.1214 |
| 28    | 1.4747 | 1.4758 | 1.4095 | 1.3887 | 1.4113 | 1.2638 | 1.4436 | 1.1326 |
| 28.25 | 1.4772 | 1.4784 | 1.4156 | 1.3892 | 1.4137 | 1.2693 | 1.4471 | 1.1426 |
| 28.5  | 1.4758 | 1.4806 | 1.4201 | 1.3884 | 1.4139 | 1.2765 | 1.45   | 1.1526 |
| 28.75 | 1.4763 | 1.4813 | 1.4239 | 1.3879 | 1.4148 | 1.2829 | 1.4546 | 1.1611 |
| 29    | 1.4771 | 1.4829 | 1.4289 | 1.3869 | 1.4157 | 1.2909 | 1.457  | 1.1725 |
| 29.25 | 1.4786 | 1.485  | 1.4341 | 1.3876 | 1.4171 | 1.2962 | 1.4586 | 1.1819 |

|       |        |        |        |        |        |        |        |        |
|-------|--------|--------|--------|--------|--------|--------|--------|--------|
| 29.5  | 1.4803 | 1.4861 | 1.4367 | 1.3872 | 1.4155 | 1.3039 | 1.4597 | 1.191  |
| 29.75 | 1.4807 | 1.4866 | 1.4387 | 1.3867 | 1.4167 | 1.309  | 1.4628 | 1.1998 |
| 30    | 1.4823 | 1.4892 | 1.4412 | 1.3844 | 1.4199 | 1.316  | 1.463  | 1.2106 |
| 30.25 | 1.4831 | 1.49   | 1.4444 | 1.3851 | 1.4199 | 1.3229 | 1.4632 | 1.2208 |
| 30.5  | 1.4829 | 1.4913 | 1.4444 | 1.385  | 1.4202 | 1.3274 | 1.4618 | 1.229  |
| 30.75 | 1.4823 | 1.4923 | 1.4446 | 1.3847 | 1.4206 | 1.3334 | 1.4621 | 1.2371 |
| 31    | 1.4825 | 1.4929 | 1.4466 | 1.3853 | 1.4204 | 1.3371 | 1.4608 | 1.2451 |
| 31.25 | 1.4843 | 1.4939 | 1.448  | 1.3849 | 1.4211 | 1.3422 | 1.46   | 1.2547 |
| 31.5  | 1.4842 | 1.496  | 1.4475 | 1.3847 | 1.42   | 1.3482 | 1.4602 | 1.2632 |
| 31.75 | 1.4837 | 1.4956 | 1.4475 | 1.383  | 1.4208 | 1.3511 | 1.4581 | 1.2725 |
| 32    | 1.4837 | 1.4964 | 1.4488 | 1.3825 | 1.4198 | 1.357  | 1.4578 | 1.2781 |
| 32.25 | 1.4847 | 1.4969 | 1.4483 | 1.3819 | 1.4205 | 1.3618 | 1.4565 | 1.286  |
| 32.5  | 1.4848 | 1.4964 | 1.448  | 1.3818 | 1.4205 | 1.3637 | 1.4557 | 1.2949 |
| 32.75 | 1.4858 | 1.4974 | 1.448  | 1.3825 | 1.4216 | 1.3667 | 1.4553 | 1.3014 |
| 33    | 1.4867 | 1.4992 | 1.4467 | 1.3816 | 1.4211 | 1.3694 | 1.4555 | 1.3087 |
| 33.25 | 1.4876 | 1.498  | 1.4476 | 1.3809 | 1.4223 | 1.3729 | 1.455  | 1.3149 |
| 33.5  | 1.4885 | 1.4993 | 1.4481 | 1.3804 | 1.4216 | 1.374  | 1.4547 | 1.3232 |
| 33.75 | 1.4883 | 1.4994 | 1.4469 | 1.3798 | 1.4226 | 1.3755 | 1.455  | 1.33   |
| 34    | 1.4888 | 1.4988 | 1.4474 | 1.38   | 1.4229 | 1.3768 | 1.4531 | 1.3384 |
| 34.25 | 1.4892 | 1.4995 | 1.4471 | 1.3792 | 1.4231 | 1.3774 | 1.4559 | 1.3447 |
| 34.5  | 1.4899 | 1.4996 | 1.4474 | 1.3784 | 1.4214 | 1.3788 | 1.4537 | 1.3513 |
| 34.75 | 1.4919 | 1.5003 | 1.4472 | 1.3785 | 1.4232 | 1.3774 | 1.4536 | 1.3562 |
| 35    | 1.492  | 1.5014 | 1.4486 | 1.3776 | 1.4217 | 1.3796 | 1.4538 | 1.3626 |
| 35.25 | 1.4922 | 1.502  | 1.4486 | 1.3778 | 1.422  | 1.3787 | 1.4542 | 1.3685 |
| 35.5  | 1.4933 | 1.5004 | 1.4477 | 1.3774 | 1.4226 | 1.3808 | 1.4542 | 1.3723 |
| 35.75 | 1.4939 | 1.5019 | 1.4479 | 1.3773 | 1.4231 | 1.3826 | 1.4544 | 1.376  |
| 36    | 1.4951 | 1.5018 | 1.4476 | 1.375  | 1.4242 | 1.3813 | 1.4548 | 1.3785 |
| 36.25 | 1.4965 | 1.5015 | 1.4469 | 1.3745 | 1.4247 | 1.3818 | 1.4541 | 1.3825 |
| 36.5  | 1.4976 | 1.5021 | 1.4473 | 1.3736 | 1.425  | 1.3818 | 1.4524 | 1.384  |
| 36.75 | 1.4983 | 1.5037 | 1.4481 | 1.3742 | 1.4239 | 1.3859 | 1.4547 | 1.3887 |
| 37    | 1.4992 | 1.5034 | 1.4477 | 1.3736 | 1.4236 | 1.384  | 1.4533 | 1.387  |
| 37.25 | 1.4997 | 1.504  | 1.449  | 1.3724 | 1.4234 | 1.3844 | 1.4529 | 1.387  |
| 37.5  | 1.5011 | 1.5037 | 1.4489 | 1.3726 | 1.4237 | 1.3854 | 1.4535 | 1.3878 |
| 37.75 | 1.502  | 1.505  | 1.4486 | 1.3714 | 1.4239 | 1.3832 | 1.4517 | 1.3875 |
| 38    | 1.5029 | 1.5047 | 1.4475 | 1.371  | 1.4239 | 1.3843 | 1.4525 | 1.3862 |
| 38.25 | 1.5029 | 1.5046 | 1.449  | 1.3703 | 1.4239 | 1.3855 | 1.4526 | 1.3845 |
| 38.5  | 1.504  | 1.505  | 1.4481 | 1.3702 | 1.4227 | 1.3841 | 1.4513 | 1.3829 |
| 38.75 | 1.5035 | 1.5042 | 1.448  | 1.3708 | 1.4229 | 1.3851 | 1.4509 | 1.3813 |
| 39    | 1.5042 | 1.505  | 1.4488 | 1.3689 | 1.4223 | 1.3868 | 1.4516 | 1.3805 |
| 39.25 | 1.5058 | 1.5049 | 1.4482 | 1.37   | 1.424  | 1.3852 | 1.4515 | 1.3794 |
| 39.5  | 1.507  | 1.5052 | 1.4485 | 1.3688 | 1.4237 | 1.3866 | 1.4519 | 1.3791 |
| 39.75 | 1.5073 | 1.506  | 1.4484 | 1.3684 | 1.4251 | 1.3857 | 1.4527 | 1.377  |

|       |        |        |        |        |        |        |        |        |
|-------|--------|--------|--------|--------|--------|--------|--------|--------|
| 40    | 1.5077 | 1.5062 | 1.4489 | 1.3678 | 1.4237 | 1.388  | 1.4522 | 1.3772 |
| 40.25 | 1.5093 | 1.5063 | 1.4496 | 1.3684 | 1.4254 | 1.3877 | 1.4527 | 1.3775 |
| 40.5  | 1.5096 | 1.506  | 1.4489 | 1.3681 | 1.4241 | 1.3881 | 1.4527 | 1.376  |
| 40.75 | 1.5108 | 1.5059 | 1.4494 | 1.3681 | 1.424  | 1.3881 | 1.4519 | 1.3744 |
| 41    | 1.5129 | 1.5053 | 1.4485 | 1.3682 | 1.4227 | 1.3883 | 1.4504 | 1.3748 |
| 41.25 | 1.5127 | 1.5048 | 1.4491 | 1.3679 | 1.4245 | 1.3887 | 1.4519 | 1.3745 |
| 41.5  | 1.513  | 1.5052 | 1.4495 | 1.3667 | 1.4231 | 1.3876 | 1.4522 | 1.3736 |
| 41.75 | 1.513  | 1.5045 | 1.4496 | 1.3656 | 1.4256 | 1.3871 | 1.452  | 1.372  |
| 42    | 1.5143 | 1.506  | 1.4492 | 1.3662 | 1.4241 | 1.3878 | 1.4525 | 1.3729 |
| 42.25 | 1.5164 | 1.506  | 1.4512 | 1.3663 | 1.4261 | 1.388  | 1.4533 | 1.3736 |
| 42.5  | 1.5166 | 1.5062 | 1.4516 | 1.3655 | 1.4249 | 1.3887 | 1.4531 | 1.3738 |
| 42.75 | 1.518  | 1.506  | 1.4518 | 1.3654 | 1.4251 | 1.3886 | 1.4526 | 1.3735 |
| 43    | 1.5154 | 1.5053 | 1.4522 | 1.3658 | 1.425  | 1.3901 | 1.4548 | 1.3739 |
| 43.25 | 1.5129 | 1.5059 | 1.4522 | 1.3642 | 1.425  | 1.3892 | 1.4533 | 1.3756 |
| 43.5  | 1.5111 | 1.5064 | 1.4527 | 1.3652 | 1.4251 | 1.389  | 1.4536 | 1.3741 |
| 43.75 | 1.5114 | 1.5084 | 1.453  | 1.3656 | 1.4245 | 1.3907 | 1.4543 | 1.3763 |
| 44    | 1.5125 | 1.5078 | 1.4529 | 1.3656 | 1.4261 | 1.3907 | 1.4556 | 1.3759 |
| 44.25 | 1.5102 | 1.5073 | 1.4529 | 1.3652 | 1.4238 | 1.3916 | 1.4552 | 1.376  |
| 44.5  | 1.5105 | 1.5065 | 1.4523 | 1.3644 | 1.4236 | 1.3916 | 1.4557 | 1.3772 |
| 44.75 | 1.5104 | 1.5065 | 1.454  | 1.3657 | 1.4245 | 1.3918 | 1.4556 | 1.3775 |
| 45    | 1.5092 | 1.5064 | 1.4543 | 1.3658 | 1.4245 | 1.3917 | 1.4563 | 1.3768 |
| 45.25 | 1.5105 | 1.5057 | 1.4541 | 1.3651 | 1.4244 | 1.3917 | 1.4569 | 1.3774 |
| 45.5  | 1.5103 | 1.5065 | 1.4557 | 1.3652 | 1.4239 | 1.393  | 1.4569 | 1.3776 |
| 45.75 | 1.51   | 1.5067 | 1.4559 | 1.3646 | 1.4254 | 1.3917 | 1.4557 | 1.3785 |
| 46    | 1.5108 | 1.5061 | 1.4561 | 1.3653 | 1.4248 | 1.3921 | 1.456  | 1.3801 |
| 46.25 | 1.5109 | 1.5064 | 1.456  | 1.365  | 1.4247 | 1.3918 | 1.4567 | 1.3799 |
| 46.5  | 1.511  | 1.5069 | 1.4571 | 1.3648 | 1.4263 | 1.3916 | 1.4574 | 1.3803 |
| 46.75 | 1.511  | 1.5052 | 1.4577 | 1.3649 | 1.4248 | 1.3916 | 1.457  | 1.3815 |
| 47    | 1.5111 | 1.5059 | 1.4574 | 1.3647 | 1.4246 | 1.393  | 1.4581 | 1.3811 |
| 47.25 | 1.5102 | 1.5042 | 1.4571 | 1.3641 | 1.4244 | 1.3926 | 1.4567 | 1.3818 |
| 47.5  | 1.5112 | 1.5044 | 1.4583 | 1.3645 | 1.4238 | 1.3925 | 1.4586 | 1.3827 |
| 47.75 | 1.5109 | 1.5036 | 1.4575 | 1.3647 | 1.4235 | 1.3925 | 1.4588 | 1.3827 |
| 48    | 1.511  | 1.5046 | 1.4582 | 1.3651 | 1.4251 | 1.3929 | 1.458  | 1.3839 |
| 48.25 | 1.511  | 1.5042 | 1.4587 | 1.3649 | 1.4236 | 1.3932 | 1.4576 | 1.3845 |
| 48.5  | 1.5111 | 1.504  | 1.4592 | 1.3636 | 1.4251 | 1.3927 | 1.4589 | 1.3843 |
| 48.75 | 1.5107 | 1.5019 | 1.4578 | 1.3628 | 1.4242 | 1.3932 | 1.4592 | 1.3846 |
| 49    | 1.5112 | 1.5026 | 1.4586 | 1.3649 | 1.4272 | 1.3917 | 1.4605 | 1.3857 |
| 49.25 | 1.5109 | 1.5034 | 1.4604 | 1.3624 | 1.4263 | 1.3912 | 1.4596 | 1.3855 |
| 49.5  | 1.5094 | 1.504  | 1.4603 | 1.3623 | 1.426  | 1.3915 | 1.46   | 1.3868 |
| 49.75 | 1.5105 | 1.5038 | 1.4602 | 1.3634 | 1.4265 | 1.3917 | 1.4599 | 1.3862 |

| <b>F6</b>    | <b>F7</b>     | <b>F8</b>     |
|--------------|---------------|---------------|
| <b>RAD 3</b> | <b>RAD 10</b> | <b>RAD 30</b> |
| 0.1709       | 0.1623        | 0.1532        |
| 0.1524       | 0.1529        | 0.1452        |
| 0.1501       | 0.1507        | 0.1431        |
| 0.1478       | 0.1512        | 0.1423        |
| 0.147        | 0.1494        | 0.1427        |
| 0.1477       | 0.1493        | 0.1426        |
| 0.148        | 0.1498        | 0.1432        |
| 0.1489       | 0.1498        | 0.1435        |
| 0.1495       | 0.1514        | 0.1444        |
| 0.152        | 0.1526        | 0.1461        |
| 0.1536       | 0.154         | 0.1477        |
| 0.1556       | 0.1562        | 0.1488        |
| 0.1585       | 0.1574        | 0.1499        |
| 0.161        | 0.1602        | 0.1522        |
| 0.1639       | 0.1617        | 0.1544        |
| 0.1673       | 0.1647        | 0.157         |
| 0.1701       | 0.167         | 0.1589        |
| 0.1741       | 0.1711        | 0.1616        |
| 0.178        | 0.1738        | 0.1644        |
| 0.1815       | 0.1769        | 0.1666        |
| 0.1867       | 0.1816        | 0.1699        |
| 0.1914       | 0.1851        | 0.1732        |
| 0.1962       | 0.1895        | 0.1763        |
| 0.2011       | 0.1938        | 0.1796        |
| 0.207        | 0.199         | 0.1828        |
| 0.2128       | 0.2039        | 0.1866        |
| 0.2191       | 0.2099        | 0.1906        |
| 0.2254       | 0.2146        | 0.1943        |
| 0.2324       | 0.2204        | 0.198         |
| 0.2401       | 0.2268        | 0.2029        |
| 0.2481       | 0.2325        | 0.2066        |
| 0.2562       | 0.24          | 0.2111        |
| 0.2641       | 0.2463        | 0.215         |
| 0.2734       | 0.2536        | 0.2186        |

|        |        |        |
|--------|--------|--------|
| 0.2826 | 0.261  | 0.2234 |
| 0.2921 | 0.2693 | 0.2278 |
| 0.3023 | 0.2776 | 0.2329 |
| 0.3127 | 0.2865 | 0.2371 |
| 0.3237 | 0.2949 | 0.2436 |
| 0.335  | 0.304  | 0.2496 |
| 0.3468 | 0.3149 | 0.2556 |
| 0.3575 | 0.3263 | 0.2604 |
| 0.3705 | 0.3367 | 0.267  |
| 0.3843 | 0.3473 | 0.2731 |
| 0.4005 | 0.3576 | 0.2787 |
| 0.4152 | 0.3689 | 0.283  |
| 0.4319 | 0.3793 | 0.2889 |
| 0.4487 | 0.3915 | 0.2936 |
| 0.4658 | 0.4014 | 0.2996 |
| 0.4839 | 0.4126 | 0.3043 |
| 0.5042 | 0.4257 | 0.3131 |
| 0.5257 | 0.4385 | 0.3206 |
| 0.5485 | 0.4545 | 0.3319 |
| 0.5694 | 0.4686 | 0.3421 |
| 0.5979 | 0.4895 | 0.3538 |
| 0.6376 | 0.5202 | 0.3631 |
| 0.6676 | 0.5374 | 0.3708 |
| 0.6946 | 0.5531 | 0.3761 |
| 0.7214 | 0.569  | 0.3845 |
| 0.7449 | 0.5853 | 0.3903 |
| 0.7712 | 0.6017 | 0.3996 |
| 0.795  | 0.6199 | 0.4068 |
| 0.8195 | 0.6359 | 0.4146 |
| 0.843  | 0.6525 | 0.4238 |
| 0.8388 | 0.6466 | 0.4173 |
| 0.8427 | 0.6493 | 0.4134 |
| 0.8644 | 0.6646 | 0.4216 |
| 0.8888 | 0.6821 | 0.43   |
| 0.9058 | 0.6981 | 0.4391 |
| 0.9252 | 0.7122 | 0.4459 |
| 0.9422 | 0.7284 | 0.4538 |
| 0.9582 | 0.743  | 0.4604 |
| 0.9739 | 0.7581 | 0.4684 |
| 0.9907 | 0.7737 | 0.4774 |
| 1.0064 | 0.7873 | 0.4866 |
| 1.0209 | 0.7987 | 0.4941 |

|        |        |        |
|--------|--------|--------|
| 1.0358 | 0.8128 | 0.503  |
| 1.0465 | 0.8258 | 0.5096 |
| 1.0606 | 0.8388 | 0.5172 |
| 1.0733 | 0.8495 | 0.5254 |
| 1.0819 | 0.8616 | 0.5354 |
| 1.0946 | 0.8739 | 0.5417 |
| 1.1093 | 0.8851 | 0.5509 |
| 1.1182 | 0.8956 | 0.5567 |
| 1.1267 | 0.905  | 0.5663 |
| 1.1361 | 0.9143 | 0.5743 |
| 1.1482 | 0.9228 | 0.5829 |
| 1.157  | 0.9313 | 0.5917 |
| 1.1666 | 0.9402 | 0.5987 |
| 1.1758 | 0.9463 | 0.6068 |
| 1.185  | 0.9548 | 0.6147 |
| 1.1956 | 0.9601 | 0.6215 |
| 1.204  | 0.9679 | 0.6287 |
| 1.2096 | 0.9749 | 0.6376 |
| 1.2178 | 0.9833 | 0.6441 |
| 1.2269 | 0.9911 | 0.6522 |
| 1.2341 | 0.998  | 0.6588 |
| 1.2433 | 1.0032 | 0.6672 |
| 1.2499 | 1.0104 | 0.6751 |
| 1.2591 | 1.0152 | 0.6824 |
| 1.266  | 1.0221 | 0.6881 |
| 1.2732 | 1.0285 | 0.697  |
| 1.28   | 1.0365 | 0.7017 |
| 1.2869 | 1.0426 | 0.7087 |
| 1.2942 | 1.0494 | 0.7149 |
| 1.2994 | 1.0533 | 0.7216 |
| 1.3055 | 1.0614 | 0.7275 |
| 1.3128 | 1.0679 | 0.7332 |
| 1.3183 | 1.0742 | 0.7396 |
| 1.3255 | 1.0815 | 0.7463 |
| 1.3338 | 1.0871 | 0.7518 |
| 1.3392 | 1.093  | 0.7559 |
| 1.3459 | 1.0989 | 0.7615 |
| 1.3529 | 1.1074 | 0.7676 |
| 1.3604 | 1.1134 | 0.7742 |
| 1.366  | 1.1178 | 0.7781 |
| 1.3714 | 1.1251 | 0.784  |
| 1.3785 | 1.1324 | 0.7876 |

|        |        |        |
|--------|--------|--------|
| 1.3843 | 1.1389 | 0.7932 |
| 1.3906 | 1.1465 | 0.7999 |
| 1.3972 | 1.1531 | 0.8067 |
| 1.405  | 1.1597 | 0.8122 |
| 1.4076 | 1.1669 | 0.8173 |
| 1.4121 | 1.1722 | 0.8201 |
| 1.4156 | 1.1792 | 0.8253 |
| 1.4225 | 1.186  | 0.8315 |
| 1.4263 | 1.1939 | 0.8351 |
| 1.4311 | 1.1999 | 0.8391 |
| 1.4338 | 1.2051 | 0.8424 |
| 1.4374 | 1.212  | 0.8467 |
| 1.4408 | 1.2172 | 0.8517 |
| 1.4426 | 1.2239 | 0.857  |
| 1.4455 | 1.2304 | 0.8613 |
| 1.4477 | 1.2358 | 0.8653 |
| 1.4503 | 1.2433 | 0.8712 |
| 1.4515 | 1.2484 | 0.8752 |
| 1.4523 | 1.2542 | 0.8804 |
| 1.4535 | 1.2606 | 0.8837 |
| 1.4535 | 1.2647 | 0.8904 |
| 1.4524 | 1.2718 | 0.8943 |
| 1.4524 | 1.2773 | 0.9005 |
| 1.4535 | 1.284  | 0.9058 |
| 1.4539 | 1.2894 | 0.9087 |
| 1.4542 | 1.2934 | 0.9136 |
| 1.4548 | 1.2996 | 0.9183 |
| 1.4548 | 1.3056 | 0.9239 |
| 1.454  | 1.3112 | 0.9265 |
| 1.4566 | 1.3196 | 0.9357 |
| 1.4541 | 1.324  | 0.9389 |
| 1.4535 | 1.3266 | 0.9445 |
| 1.4538 | 1.3337 | 0.9485 |
| 1.4529 | 1.3391 | 0.9532 |
| 1.4527 | 1.344  | 0.9608 |
| 1.4514 | 1.3494 | 0.9634 |
| 1.4516 | 1.355  | 0.9693 |
| 1.4523 | 1.3586 | 0.9735 |
| 1.4526 | 1.3626 | 0.9791 |
| 1.4513 | 1.3684 | 0.9835 |
| 1.4527 | 1.3725 | 0.9885 |
| 1.4526 | 1.3759 | 0.9902 |

|        |        |        |
|--------|--------|--------|
| 1.4529 | 1.3806 | 0.9956 |
| 1.4526 | 1.3846 | 0.9991 |
| 1.4532 | 1.3894 | 1.0044 |
| 1.4518 | 1.3915 | 1.0077 |
| 1.4525 | 1.3936 | 1.012  |
| 1.4516 | 1.3973 | 1.016  |
| 1.4534 | 1.3978 | 1.0223 |
| 1.4532 | 1.4    | 1.0261 |
| 1.4539 | 1.4014 | 1.0332 |
| 1.454  | 1.4027 | 1.036  |
| 1.4532 | 1.4041 | 1.0399 |
| 1.4541 | 1.4055 | 1.046  |
| 1.4535 | 1.4073 | 1.0482 |
| 1.4527 | 1.4075 | 1.0564 |
| 1.4523 | 1.4083 | 1.0582 |
| 1.4521 | 1.4098 | 1.0626 |
| 1.4524 | 1.4099 | 1.066  |
| 1.4523 | 1.4099 | 1.0714 |
| 1.4524 | 1.4103 | 1.0744 |
| 1.4511 | 1.4098 | 1.079  |
| 1.4524 | 1.4108 | 1.0834 |
| 1.4509 | 1.4118 | 1.0876 |
| 1.4518 | 1.4122 | 1.0932 |
| 1.4507 | 1.412  | 1.0957 |
| 1.4518 | 1.4115 | 1.1023 |
| 1.4512 | 1.4116 | 1.1045 |
| 1.4516 | 1.4125 | 1.1099 |
| 1.4502 | 1.4124 | 1.1139 |
| 1.4521 | 1.4115 | 1.1185 |
| 1.4514 | 1.4122 | 1.1221 |
| 1.451  | 1.4122 | 1.1266 |
| 1.4508 | 1.4136 | 1.1298 |
| 1.4494 | 1.4135 | 1.1349 |
| 1.45   | 1.4136 | 1.1381 |
| 1.4497 | 1.4132 | 1.1421 |
| 1.4491 | 1.4128 | 1.1478 |
| 1.4507 | 1.413  | 1.1517 |
| 1.4497 | 1.413  | 1.1572 |
| 1.4504 | 1.412  | 1.1619 |
| 1.4501 | 1.4131 | 1.1673 |



HSP 42

|      |        |          |           | G1      | G2     | G3     | G4       |
|------|--------|----------|-----------|---------|--------|--------|----------|
| TIME | WT     | WT(GA 3) | WT(RAD 3) | NO DRUG | GA 3uM | GA 7uM | NOVO 100 |
| 0    | 0.1894 | 0.2051   | 0.1892    | 0.1695  | 0.1723 | 0.1648 | 0.2082   |
| 0.25 | 0.1844 | 0.1929   | 0.1812    | 0.1605  | 0.1589 | 0.1561 | 0.2121   |
| 0.5  | 0.1833 | 0.1912   | 0.1787    | 0.1595  | 0.1568 | 0.1532 | 0.2147   |
| 0.75 | 0.1838 | 0.189    | 0.1758    | 0.1567  | 0.154  | 0.1513 | 0.2141   |
| 1    | 0.1843 | 0.1877   | 0.1818    | 0.1565  | 0.153  | 0.1507 | 0.2136   |
| 1.25 | 0.1867 | 0.1862   | 0.1836    | 0.1578  | 0.1535 | 0.151  | 0.2151   |

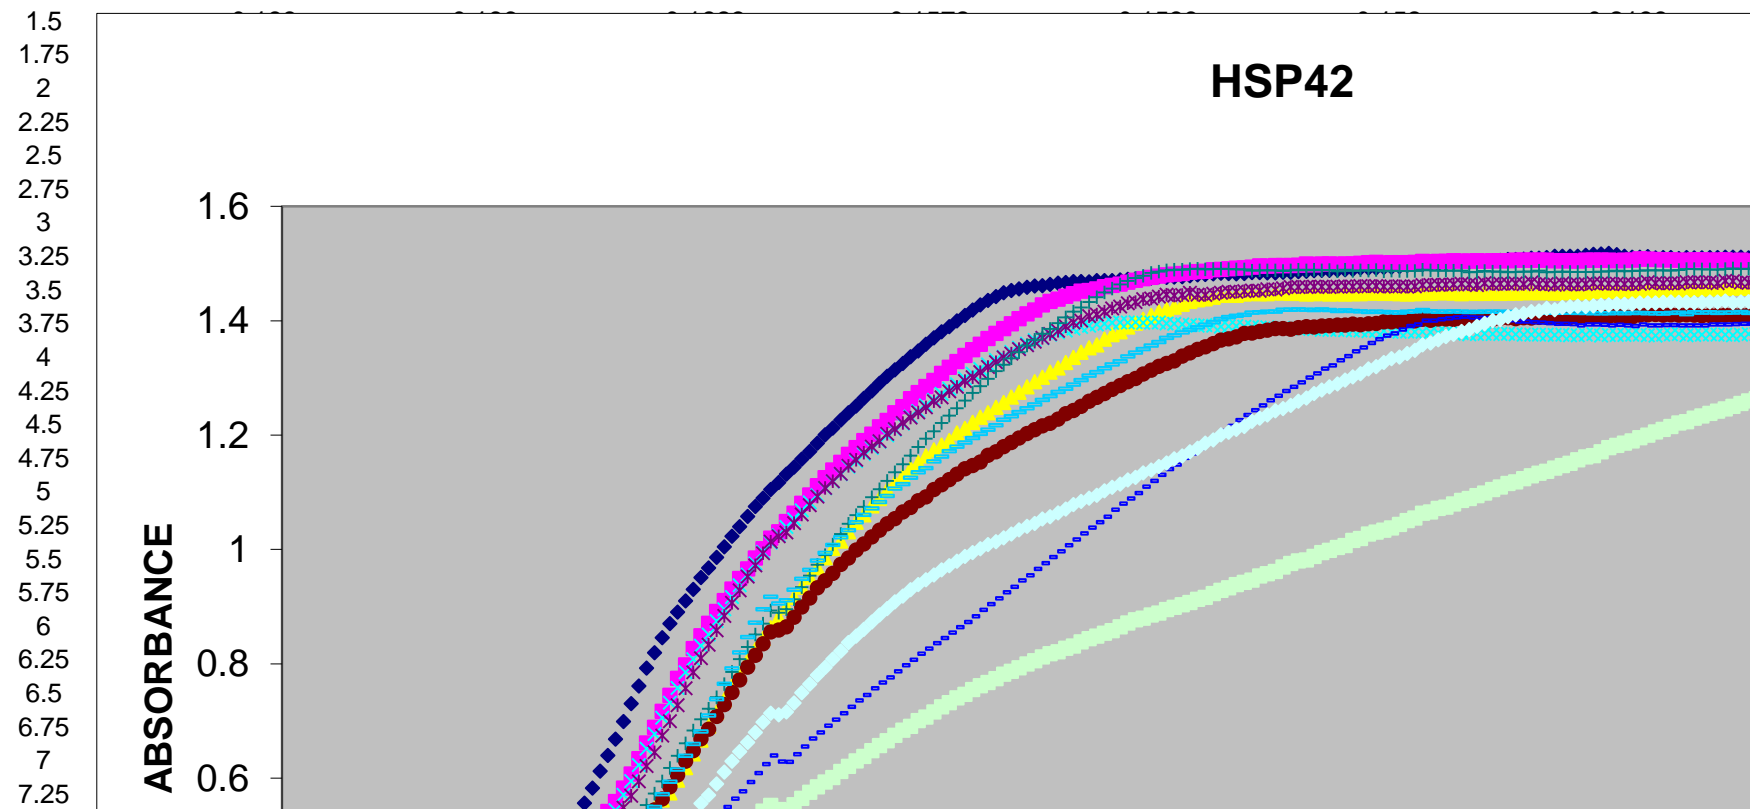

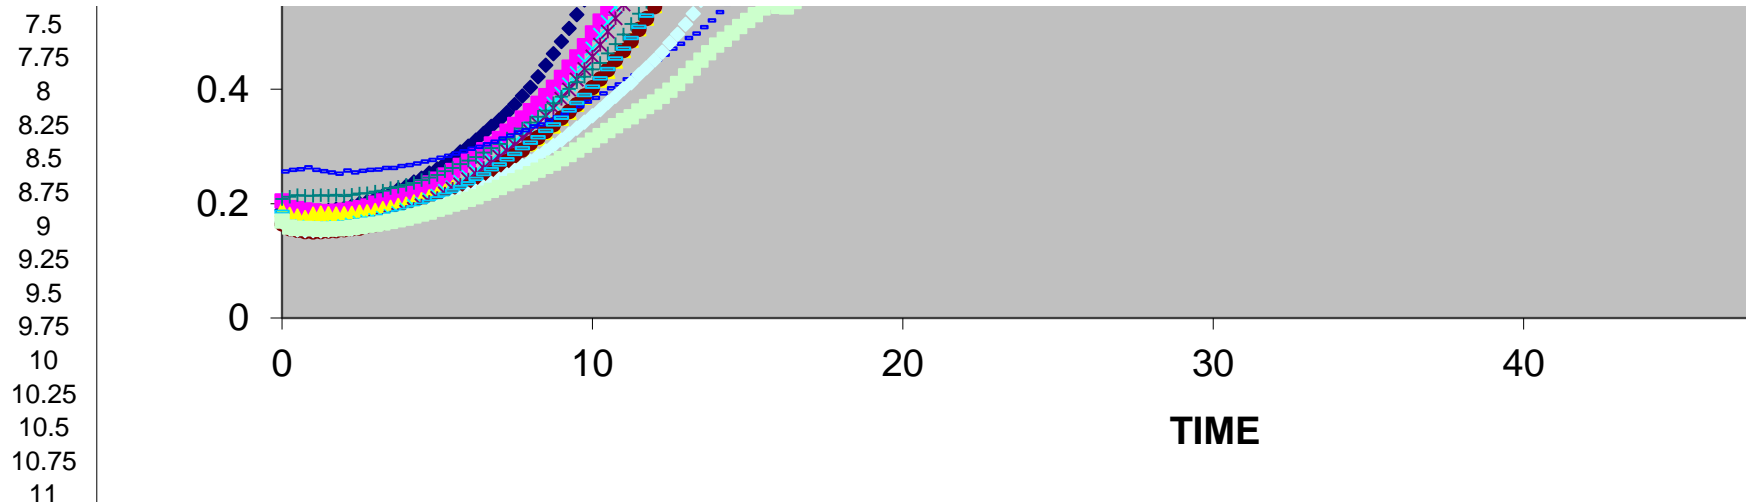

|       |        |        |        |        |        |        |        |
|-------|--------|--------|--------|--------|--------|--------|--------|
| 11.25 | 0.7307 | 0.6075 | 0.4857 | 0.5951 | 0.5692 | 0.4848 | 0.5144 |
| 11.5  | 0.7614 | 0.6339 | 0.5059 | 0.6228 | 0.5944 | 0.505  | 0.5323 |
| 11.75 | 0.7927 | 0.6618 | 0.5242 | 0.6514 | 0.6212 | 0.5239 | 0.5531 |
| 12    | 0.8194 | 0.6889 | 0.5464 | 0.6774 | 0.6456 | 0.5444 | 0.5732 |
| 12.25 | 0.8459 | 0.7168 | 0.5622 | 0.7056 | 0.6743 | 0.5638 | 0.5945 |
| 12.5  | 0.8706 | 0.7448 | 0.5743 | 0.7319 | 0.6997 | 0.5847 | 0.6178 |
| 12.75 | 0.8904 | 0.7744 | 0.5968 | 0.758  | 0.7277 | 0.6054 | 0.6393 |
| 13    | 0.9099 | 0.7982 | 0.6186 | 0.7852 | 0.7574 | 0.6299 | 0.6613 |
| 13.25 | 0.9301 | 0.8269 | 0.6426 | 0.8085 | 0.7852 | 0.6484 | 0.6834 |
| 13.5  | 0.9508 | 0.849  | 0.6665 | 0.8315 | 0.8097 | 0.6691 | 0.7029 |
| 13.75 | 0.9679 | 0.8707 | 0.6913 | 0.8512 | 0.8332 | 0.6859 | 0.7214 |
| 14    | 0.986  | 0.8918 | 0.7152 | 0.8748 | 0.8587 | 0.7078 | 0.7418 |
| 14.25 | 1.0047 | 0.9106 | 0.7372 | 0.8955 | 0.8836 | 0.7289 | 0.7645 |
| 14.5  | 1.0233 | 0.9308 | 0.7608 | 0.9168 | 0.907  | 0.75   | 0.7859 |
| 14.75 | 1.0397 | 0.9491 | 0.7825 | 0.9374 | 0.9288 | 0.7716 | 0.808  |
| 15    | 1.0577 | 0.966  | 0.8057 | 0.9562 | 0.9527 | 0.7943 | 0.8296 |
| 15.25 | 1.0753 | 0.9853 | 0.8251 | 0.9757 | 0.9722 | 0.8152 | 0.8512 |
| 15.5  | 1.0897 | 1.0015 | 0.8439 | 0.9959 | 0.9937 | 0.835  | 0.8706 |
| 15.75 | 1.1049 | 1.0198 | 0.8628 | 1.0121 | 1.0137 | 0.8557 | 0.8934 |
| 16    | 1.1171 | 1.031  | 0.8817 | 1.0251 | 1.0232 | 0.859  | 0.8892 |
| 16.25 | 1.1316 | 1.0487 | 0.8996 | 1.0393 | 1.0298 | 0.8647 | 0.8956 |
| 16.5  | 1.1443 | 1.0637 | 0.9165 | 1.0529 | 1.0461 | 0.8818 | 0.9129 |
| 16.75 | 1.1579 | 1.0806 | 0.9342 | 1.0687 | 1.0613 | 0.8995 | 0.9343 |
| 17    | 1.1715 | 1.0952 | 0.9517 | 1.0827 | 1.0774 | 0.9149 | 0.9543 |
| 17.25 | 1.1858 | 1.1114 | 0.9682 | 1.0948 | 1.0927 | 0.9329 | 0.9731 |
| 17.5  | 1.2004 | 1.1256 | 0.9855 | 1.107  | 1.1075 | 0.9456 | 0.9901 |
| 17.75 | 1.2123 | 1.1388 | 1.0016 | 1.1187 | 1.1195 | 0.9583 | 1.0085 |

|       |        |        |        |        |        |        |        |
|-------|--------|--------|--------|--------|--------|--------|--------|
| 18    | 1.2261 | 1.1522 | 1.015  | 1.132  | 1.1325 | 0.9741 | 1.0268 |
| 18.25 | 1.239  | 1.1664 | 1.0307 | 1.1447 | 1.1464 | 0.9852 | 1.0449 |
| 18.5  | 1.251  | 1.1779 | 1.0478 | 1.1544 | 1.1571 | 0.9991 | 1.0602 |
| 18.75 | 1.2641 | 1.1907 | 1.0607 | 1.1669 | 1.1694 | 1.0095 | 1.0748 |
| 19    | 1.2773 | 1.2018 | 1.0765 | 1.1777 | 1.1797 | 1.0221 | 1.0915 |
| 19.25 | 1.2907 | 1.2145 | 1.0891 | 1.188  | 1.1892 | 1.0339 | 1.1055 |
| 19.5  | 1.3032 | 1.2259 | 1.1041 | 1.1996 | 1.202  | 1.0451 | 1.12   |
| 19.75 | 1.3141 | 1.239  | 1.1166 | 1.2096 | 1.2108 | 1.0537 | 1.1353 |
| 20    | 1.3251 | 1.2497 | 1.1283 | 1.2203 | 1.2211 | 1.0654 | 1.1492 |
| 20.25 | 1.3374 | 1.2637 | 1.1419 | 1.2325 | 1.231  | 1.0733 | 1.1641 |
| 20.5  | 1.3474 | 1.2743 | 1.1521 | 1.2418 | 1.2397 | 1.0851 | 1.1791 |
| 20.75 | 1.3589 | 1.2848 | 1.1637 | 1.252  | 1.2486 | 1.0921 | 1.1936 |
| 21    | 1.3704 | 1.2956 | 1.1744 | 1.2616 | 1.2593 | 1.1049 | 1.2066 |
| 21.25 | 1.3806 | 1.3083 | 1.1829 | 1.272  | 1.2661 | 1.1131 | 1.2212 |
| 21.5  | 1.39   | 1.3184 | 1.1906 | 1.2812 | 1.2764 | 1.1221 | 1.2339 |
| 21.75 | 1.3999 | 1.3289 | 1.2037 | 1.2888 | 1.2846 | 1.1318 | 1.2472 |
| 22    | 1.4093 | 1.3395 | 1.2116 | 1.2991 | 1.2946 | 1.141  | 1.2605 |
| 22.25 | 1.4189 | 1.3493 | 1.2223 | 1.3072 | 1.3015 | 1.1466 | 1.2737 |
| 22.5  | 1.4278 | 1.3589 | 1.2316 | 1.3156 | 1.3105 | 1.1532 | 1.2855 |
| 22.75 | 1.4356 | 1.369  | 1.2391 | 1.3239 | 1.319  | 1.1646 | 1.2986 |
| 23    | 1.4425 | 1.3781 | 1.2485 | 1.3315 | 1.3274 | 1.171  | 1.312  |
| 23.25 | 1.4488 | 1.3861 | 1.257  | 1.337  | 1.336  | 1.1801 | 1.3229 |
| 23.5  | 1.4527 | 1.3947 | 1.2667 | 1.3453 | 1.3428 | 1.187  | 1.3344 |
| 23.75 | 1.4559 | 1.4037 | 1.2752 | 1.353  | 1.3506 | 1.1951 | 1.3452 |
| 24    | 1.4583 | 1.4119 | 1.2845 | 1.3602 | 1.3571 | 1.2026 | 1.3568 |
| 24.25 | 1.4609 | 1.4188 | 1.2937 | 1.366  | 1.3637 | 1.2094 | 1.367  |
| 24.5  | 1.4615 | 1.4276 | 1.3014 | 1.3697 | 1.3699 | 1.216  | 1.3776 |
| 24.75 | 1.4635 | 1.4341 | 1.3101 | 1.3758 | 1.3767 | 1.2207 | 1.3856 |
| 25    | 1.466  | 1.4379 | 1.3177 | 1.3797 | 1.3827 | 1.2281 | 1.3958 |
| 25.25 | 1.4669 | 1.4431 | 1.3269 | 1.3828 | 1.3905 | 1.2374 | 1.4058 |
| 25.5  | 1.4687 | 1.4476 | 1.3358 | 1.3861 | 1.3969 | 1.2429 | 1.416  |
| 25.75 | 1.4687 | 1.4518 | 1.345  | 1.3889 | 1.4005 | 1.2502 | 1.4231 |
| 26    | 1.4682 | 1.453  | 1.3526 | 1.3913 | 1.408  | 1.2591 | 1.433  |
| 26.25 | 1.4704 | 1.4557 | 1.3577 | 1.3937 | 1.4109 | 1.2659 | 1.4415 |
| 26.5  | 1.4702 | 1.4595 | 1.368  | 1.3949 | 1.4159 | 1.2726 | 1.4496 |
| 26.75 | 1.4706 | 1.4619 | 1.3756 | 1.3964 | 1.4214 | 1.2801 | 1.4565 |
| 27    | 1.4716 | 1.4639 | 1.3808 | 1.3968 | 1.4251 | 1.287  | 1.4637 |
| 27.25 | 1.4725 | 1.4677 | 1.3894 | 1.397  | 1.4306 | 1.2933 | 1.4695 |
| 27.5  | 1.473  | 1.4709 | 1.396  | 1.3973 | 1.4331 | 1.2992 | 1.475  |
| 27.75 | 1.4747 | 1.4735 | 1.4025 | 1.3967 | 1.4381 | 1.3067 | 1.4789 |
| 28    | 1.4747 | 1.4758 | 1.4095 | 1.3968 | 1.4392 | 1.3135 | 1.4839 |
| 28.25 | 1.4772 | 1.4784 | 1.4156 | 1.397  | 1.4425 | 1.3203 | 1.4862 |

|       |        |        |        |        |        |        |        |
|-------|--------|--------|--------|--------|--------|--------|--------|
| 28.5  | 1.4758 | 1.4806 | 1.4201 | 1.3954 | 1.4455 | 1.3254 | 1.4881 |
| 28.75 | 1.4763 | 1.4813 | 1.4239 | 1.3945 | 1.4443 | 1.3301 | 1.4894 |
| 29    | 1.4771 | 1.4829 | 1.4289 | 1.3934 | 1.4454 | 1.3382 | 1.4892 |
| 29.25 | 1.4786 | 1.485  | 1.4341 | 1.3924 | 1.4488 | 1.3437 | 1.4903 |
| 29.5  | 1.4803 | 1.4861 | 1.4367 | 1.3916 | 1.4456 | 1.3498 | 1.4908 |
| 29.75 | 1.4807 | 1.4866 | 1.4387 | 1.3927 | 1.4451 | 1.3542 | 1.4901 |
| 30    | 1.4823 | 1.4892 | 1.4412 | 1.3914 | 1.4472 | 1.36   | 1.4904 |
| 30.25 | 1.4831 | 1.49   | 1.4444 | 1.3899 | 1.449  | 1.3662 | 1.4911 |
| 30.5  | 1.4829 | 1.4913 | 1.4444 | 1.3905 | 1.4508 | 1.3682 | 1.4903 |
| 30.75 | 1.4823 | 1.4923 | 1.4446 | 1.3907 | 1.4508 | 1.3719 | 1.4897 |
| 31    | 1.4825 | 1.4929 | 1.4466 | 1.3899 | 1.4517 | 1.3778 | 1.4901 |
| 31.25 | 1.4843 | 1.4939 | 1.448  | 1.3893 | 1.4527 | 1.3785 | 1.4878 |
| 31.5  | 1.4842 | 1.496  | 1.4475 | 1.3879 | 1.4523 | 1.3815 | 1.4882 |
| 31.75 | 1.4837 | 1.4956 | 1.4475 | 1.3888 | 1.4552 | 1.3837 | 1.4882 |
| 32    | 1.4837 | 1.4964 | 1.4488 | 1.3866 | 1.4549 | 1.3861 | 1.488  |
| 32.25 | 1.4847 | 1.4969 | 1.4483 | 1.3875 | 1.4569 | 1.3863 | 1.4873 |
| 32.5  | 1.4848 | 1.4964 | 1.448  | 1.3866 | 1.459  | 1.3855 | 1.4885 |
| 32.75 | 1.4858 | 1.4974 | 1.448  | 1.3856 | 1.4592 | 1.3878 | 1.4892 |
| 33    | 1.4867 | 1.4992 | 1.4467 | 1.3872 | 1.4594 | 1.3895 | 1.4881 |
| 33.25 | 1.4876 | 1.498  | 1.4476 | 1.3855 | 1.4598 | 1.3893 | 1.4893 |
| 33.5  | 1.4885 | 1.4993 | 1.4481 | 1.3839 | 1.4595 | 1.3908 | 1.4884 |
| 33.75 | 1.4883 | 1.4994 | 1.4469 | 1.3839 | 1.459  | 1.3913 | 1.4889 |
| 34    | 1.4888 | 1.4988 | 1.4474 | 1.3841 | 1.4596 | 1.3924 | 1.4865 |
| 34.25 | 1.4892 | 1.4995 | 1.4471 | 1.3836 | 1.4601 | 1.3924 | 1.4895 |
| 34.5  | 1.4899 | 1.4996 | 1.4474 | 1.3829 | 1.4596 | 1.3944 | 1.4873 |
| 34.75 | 1.4919 | 1.5003 | 1.4472 | 1.3828 | 1.4607 | 1.3932 | 1.4881 |
| 35    | 1.492  | 1.5014 | 1.4486 | 1.3819 | 1.4603 | 1.3946 | 1.4876 |
| 35.25 | 1.4922 | 1.502  | 1.4486 | 1.3824 | 1.4606 | 1.3954 | 1.4888 |
| 35.5  | 1.4933 | 1.5004 | 1.4477 | 1.3824 | 1.4598 | 1.3983 | 1.4867 |
| 35.75 | 1.4939 | 1.5019 | 1.4479 | 1.3808 | 1.4601 | 1.3984 | 1.4879 |
| 36    | 1.4951 | 1.5018 | 1.4476 | 1.3805 | 1.4602 | 1.3989 | 1.4869 |
| 36.25 | 1.4965 | 1.5015 | 1.4469 | 1.3816 | 1.4596 | 1.4002 | 1.4873 |
| 36.5  | 1.4976 | 1.5021 | 1.4473 | 1.381  | 1.4603 | 1.3996 | 1.487  |
| 36.75 | 1.4983 | 1.5037 | 1.4481 | 1.381  | 1.4627 | 1.4028 | 1.4892 |
| 37    | 1.4992 | 1.5034 | 1.4477 | 1.38   | 1.4626 | 1.4012 | 1.4881 |
| 37.25 | 1.4997 | 1.504  | 1.449  | 1.3789 | 1.4632 | 1.4033 | 1.4874 |
| 37.5  | 1.5011 | 1.5037 | 1.4489 | 1.379  | 1.4628 | 1.403  | 1.4878 |
| 37.75 | 1.502  | 1.505  | 1.4486 | 1.3773 | 1.4635 | 1.4026 | 1.4875 |
| 38    | 1.5029 | 1.5047 | 1.4475 | 1.3783 | 1.4645 | 1.4033 | 1.4876 |
| 38.25 | 1.5029 | 1.5046 | 1.449  | 1.3765 | 1.4637 | 1.4028 | 1.4851 |
| 38.5  | 1.504  | 1.505  | 1.4481 | 1.3771 | 1.4625 | 1.403  | 1.4856 |
| 38.75 | 1.5035 | 1.5042 | 1.448  | 1.3775 | 1.4658 | 1.4033 | 1.4871 |

|       |        |        |        |        |        |        |        |
|-------|--------|--------|--------|--------|--------|--------|--------|
| 39    | 1.5042 | 1.505  | 1.4488 | 1.377  | 1.4642 | 1.4025 | 1.4859 |
| 39.25 | 1.5058 | 1.5049 | 1.4482 | 1.377  | 1.465  | 1.4043 | 1.4861 |
| 39.5  | 1.507  | 1.5052 | 1.4485 | 1.3772 | 1.4649 | 1.4053 | 1.485  |
| 39.75 | 1.5073 | 1.506  | 1.4484 | 1.3763 | 1.4652 | 1.4039 | 1.4854 |
| 40    | 1.5077 | 1.5062 | 1.4489 | 1.3759 | 1.4644 | 1.4054 | 1.486  |
| 40.25 | 1.5093 | 1.5063 | 1.4496 | 1.3757 | 1.4672 | 1.4046 | 1.4858 |
| 40.5  | 1.5096 | 1.506  | 1.4489 | 1.3758 | 1.4643 | 1.4057 | 1.4875 |
| 40.75 | 1.5108 | 1.5059 | 1.4494 | 1.3757 | 1.4644 | 1.4061 | 1.485  |
| 41    | 1.5129 | 1.5053 | 1.4485 | 1.3753 | 1.4628 | 1.4067 | 1.4852 |
| 41.25 | 1.5127 | 1.5048 | 1.4491 | 1.3759 | 1.4653 | 1.4056 | 1.4859 |
| 41.5  | 1.513  | 1.5052 | 1.4495 | 1.3746 | 1.4638 | 1.4061 | 1.4854 |
| 41.75 | 1.513  | 1.5045 | 1.4496 | 1.3747 | 1.4634 | 1.4059 | 1.4855 |
| 42    | 1.5143 | 1.506  | 1.4492 | 1.3755 | 1.4641 | 1.4074 | 1.4854 |
| 42.25 | 1.5164 | 1.506  | 1.4512 | 1.3768 | 1.4661 | 1.4072 | 1.4856 |
| 42.5  | 1.5166 | 1.5062 | 1.4516 | 1.374  | 1.4653 | 1.4081 | 1.4861 |
| 42.75 | 1.518  | 1.506  | 1.4518 | 1.3753 | 1.4648 | 1.4079 | 1.4863 |
| 43    | 1.5154 | 1.5053 | 1.4522 | 1.375  | 1.4647 | 1.4088 | 1.4875 |
| 43.25 | 1.5129 | 1.5059 | 1.4522 | 1.3754 | 1.4641 | 1.4073 | 1.4863 |
| 43.5  | 1.5111 | 1.5064 | 1.4527 | 1.3755 | 1.4641 | 1.4067 | 1.4869 |
| 43.75 | 1.5114 | 1.5084 | 1.453  | 1.3756 | 1.4648 | 1.41   | 1.4876 |
| 44    | 1.5125 | 1.5078 | 1.4529 | 1.3744 | 1.4675 | 1.4102 | 1.488  |
| 44.25 | 1.5102 | 1.5073 | 1.4529 | 1.3739 | 1.4656 | 1.4112 | 1.4883 |
| 44.5  | 1.5105 | 1.5065 | 1.4523 | 1.3759 | 1.4653 | 1.41   | 1.4881 |
| 44.75 | 1.5104 | 1.5065 | 1.454  | 1.3763 | 1.4658 | 1.4107 | 1.4877 |
| 45    | 1.5092 | 1.5064 | 1.4543 | 1.3767 | 1.4651 | 1.41   | 1.489  |
| 45.25 | 1.5105 | 1.5057 | 1.4541 | 1.3749 | 1.4676 | 1.4103 | 1.4903 |
| 45.5  | 1.5103 | 1.5065 | 1.4557 | 1.3752 | 1.4673 | 1.4098 | 1.4907 |
| 45.75 | 1.51   | 1.5067 | 1.4559 | 1.3759 | 1.4671 | 1.4088 | 1.49   |
| 46    | 1.5108 | 1.5061 | 1.4561 | 1.3764 | 1.4673 | 1.4091 | 1.4899 |
| 46.25 | 1.5109 | 1.5064 | 1.456  | 1.3757 | 1.4661 | 1.4096 | 1.4893 |
| 46.5  | 1.511  | 1.5069 | 1.4571 | 1.3755 | 1.4699 | 1.41   | 1.4906 |
| 46.75 | 1.511  | 1.5052 | 1.4577 | 1.3748 | 1.4691 | 1.41   | 1.4914 |
| 47    | 1.5111 | 1.5059 | 1.4574 | 1.3758 | 1.467  | 1.4096 | 1.4903 |
| 47.25 | 1.5102 | 1.5042 | 1.4571 | 1.377  | 1.4664 | 1.4101 | 1.491  |
| 47.5  | 1.5112 | 1.5044 | 1.4583 | 1.3767 | 1.4677 | 1.4096 | 1.49   |
| 47.75 | 1.5109 | 1.5036 | 1.4575 | 1.3784 | 1.4657 | 1.4101 | 1.4906 |
| 48    | 1.511  | 1.5046 | 1.4582 | 1.379  | 1.4674 | 1.4108 | 1.4911 |
| 48.25 | 1.511  | 1.5042 | 1.4587 | 1.3789 | 1.4657 | 1.4098 | 1.4904 |
| 48.5  | 1.5111 | 1.504  | 1.4592 | 1.3788 | 1.4666 | 1.41   | 1.4909 |
| 48.75 | 1.5107 | 1.5019 | 1.4578 | 1.3798 | 1.4653 | 1.409  | 1.4911 |
| 49    | 1.5112 | 1.5026 | 1.4586 | 1.3783 | 1.4659 | 1.4086 | 1.4922 |
| 49.25 | 1.5109 | 1.5034 | 1.4604 | 1.3786 | 1.4663 | 1.4093 | 1.491  |

|       |        |        |        |        |        |        |        |
|-------|--------|--------|--------|--------|--------|--------|--------|
| 49.5  | 1.5094 | 1.504  | 1.4603 | 1.3789 | 1.4658 | 1.4101 | 1.4922 |
| 49.75 | 1.5105 | 1.5038 | 1.4602 | 1.3777 | 1.4672 | 1.4077 | 1.4915 |

| G5              | G6           | G7            | G8            |
|-----------------|--------------|---------------|---------------|
| <b>NOVO 250</b> | <b>RAD 3</b> | <b>RAD 10</b> | <b>RAD 30</b> |
| 0.2563          | 0.1856       | 0.1682        | 0.1696        |
| 0.2592          | 0.1682       | 0.1562        | 0.1592        |
| 0.2601          | 0.1653       | 0.1538        | 0.1567        |
| 0.2636          | 0.164        | 0.153         | 0.1569        |
| 0.259           | 0.1627       | 0.1528        | 0.1563        |
| 0.257           | 0.1636       | 0.1522        | 0.155         |

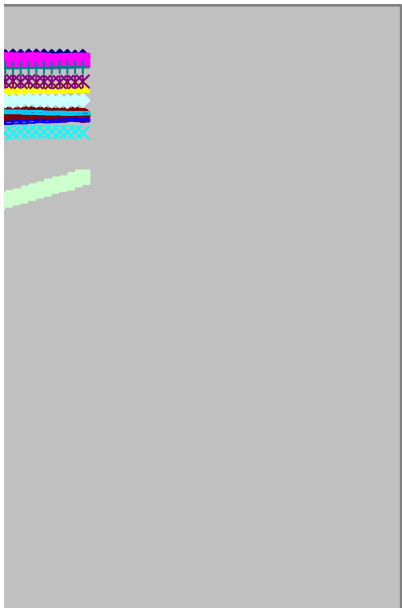

- ◆ WT
- WT(GA 3)
- ▲ WT(RAD 3)
- × NO DRUG
- \* GA 3uM
- GA 7uM
- + NOVO 100
- NOVO 250

0.1556  
0.1561  
0.157  
0.1583  
0.1602  
0.1625  
0.164  
0.1662  
0.1689  
0.1718  
0.1749  
0.1784  
0.1819  
0.1855  
0.1904  
0.1941  
0.1992  
0.2027  
0.2079  
0.2124  
0.2186  
0.2236  
0.2286  
0.2351

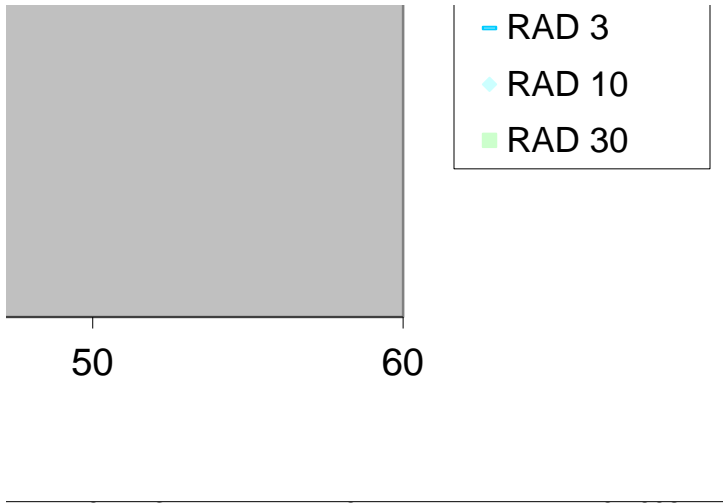

|        |        |        |        |
|--------|--------|--------|--------|
| 0.4243 | 0.4899 | 0.4113 | 0.2402 |
| 0.4339 | 0.5096 | 0.4254 | 0.2464 |
| 0.4409 | 0.5289 | 0.4377 | 0.2523 |
| 0.4522 | 0.5498 | 0.4512 | 0.2586 |
| 0.4609 | 0.5721 | 0.4651 | 0.2652 |
| 0.4711 | 0.594  | 0.4815 | 0.271  |
| 0.4799 | 0.6152 | 0.4965 | 0.2788 |
| 0.4899 | 0.6394 | 0.5137 | 0.2862 |
| 0.4978 | 0.6598 | 0.5322 | 0.2937 |
| 0.5089 | 0.6819 | 0.5557 | 0.3022 |
| 0.5203 | 0.7096 | 0.5706 | 0.3115 |
| 0.5349 | 0.7383 | 0.5902 | 0.3188 |
| 0.5496 | 0.7651 | 0.6106 | 0.3282 |
| 0.5641 | 0.7918 | 0.6298 | 0.3366 |
| 0.5771 | 0.82   | 0.6467 | 0.3456 |
| 0.5934 | 0.8467 | 0.6627 | 0.3523 |
| 0.6088 | 0.8719 | 0.6798 | 0.3619 |
| 0.6249 | 0.8957 | 0.6978 | 0.3698 |
| 0.64   | 0.9175 | 0.7134 | 0.378  |
| 0.6289 | 0.9056 | 0.7109 | 0.3881 |
| 0.6284 | 0.9113 | 0.7158 | 0.3987 |
| 0.6418 | 0.9294 | 0.7313 | 0.4102 |
| 0.6557 | 0.9488 | 0.7495 | 0.4239 |
| 0.6692 | 0.9646 | 0.7645 | 0.4369 |
| 0.6798 | 0.9808 | 0.7804 | 0.4511 |
| 0.6918 | 0.9941 | 0.7936 | 0.4638 |
| 0.7022 | 1.008  | 0.8084 | 0.4777 |
|        |        |        | 0.4874 |
|        |        |        | 0.4986 |
|        |        |        | 0.5097 |
|        |        |        | 0.5204 |
|        |        |        | 0.5307 |
|        |        |        | 0.5424 |
|        |        |        | 0.5522 |
|        |        |        | 0.5454 |
|        |        |        | 0.544  |
|        |        |        | 0.5533 |
|        |        |        | 0.5646 |
|        |        |        | 0.5756 |
|        |        |        | 0.5847 |
|        |        |        | 0.5935 |
|        |        |        | 0.6011 |



|        |        |        |        |
|--------|--------|--------|--------|
| 0.7138 | 1.0213 | 0.8223 | 0.6117 |
| 0.7249 | 1.0339 | 0.8372 | 0.6208 |
| 0.7362 | 1.048  | 0.8487 | 0.6304 |
| 0.7453 | 1.0608 | 0.8604 | 0.6381 |
| 0.7574 | 1.0716 | 0.8734 | 0.6479 |
| 0.7673 | 1.0833 | 0.8853 | 0.6573 |
| 0.7762 | 1.0938 | 0.8964 | 0.6657 |
| 0.7872 | 1.1065 | 0.9084 | 0.6748 |
| 0.7974 | 1.1142 | 0.9187 | 0.6841 |
| 0.807  | 1.1253 | 0.9296 | 0.6906 |
| 0.8178 | 1.1353 | 0.9385 | 0.7007 |
| 0.8267 | 1.1423 | 0.9472 | 0.7071 |
| 0.8361 | 1.154  | 0.9555 | 0.7161 |
| 0.8452 | 1.1624 | 0.9641 | 0.7248 |
| 0.8549 | 1.1722 | 0.9714 | 0.7323 |
| 0.8642 | 1.1799 | 0.9795 | 0.7406 |
| 0.8734 | 1.1872 | 0.9881 | 0.7467 |
| 0.8832 | 1.1952 | 0.9946 | 0.7553 |
| 0.8943 | 1.2024 | 1.0015 | 0.7615 |
| 0.9046 | 1.2095 | 1.0084 | 0.7676 |
| 0.9143 | 1.2174 | 1.0137 | 0.774  |
| 0.9254 | 1.2266 | 1.0203 | 0.7821 |
| 0.9346 | 1.2331 | 1.0273 | 0.7867 |
| 0.9459 | 1.2401 | 1.0342 | 0.7929 |
| 0.9547 | 1.2468 | 1.0406 | 0.7998 |
| 0.966  | 1.254  | 1.0455 | 0.8055 |
| 0.9762 | 1.2617 | 1.0535 | 0.8123 |
| 0.9869 | 1.2682 | 1.0573 | 0.818  |
| 0.9967 | 1.2758 | 1.0642 | 0.8213 |
| 1.0075 | 1.281  | 1.0705 | 0.827  |
| 1.0175 | 1.2887 | 1.0783 | 0.8314 |
| 1.028  | 1.2962 | 1.0844 | 0.8386 |
| 1.038  | 1.3042 | 1.0898 | 0.8438 |
| 1.048  | 1.3104 | 1.0948 | 0.8484 |
| 1.0575 | 1.317  | 1.1024 | 0.8536 |
| 1.0695 | 1.3239 | 1.1085 | 0.858  |
| 1.0801 | 1.3293 | 1.1141 | 0.8646 |
| 1.0894 | 1.3375 | 1.1217 | 0.8712 |
| 1.0989 | 1.3445 | 1.126  | 0.8772 |
| 1.11   | 1.3508 | 1.1337 | 0.8796 |
| 1.1198 | 1.3565 | 1.1389 | 0.8856 |
| 1.1305 | 1.3628 | 1.1454 | 0.8887 |

|        |        |        |        |
|--------|--------|--------|--------|
| 1.1407 | 1.3704 | 1.1511 | 0.8952 |
| 1.1486 | 1.3748 | 1.1586 | 0.899  |
| 1.1601 | 1.3795 | 1.1639 | 0.9034 |
| 1.1682 | 1.3844 | 1.1708 | 0.9072 |
| 1.1777 | 1.3887 | 1.1772 | 0.9127 |
| 1.1878 | 1.3932 | 1.1862 | 0.9163 |
| 1.1981 | 1.3975 | 1.1918 | 0.923  |
| 1.2072 | 1.4034 | 1.2003 | 0.9284 |
| 1.2163 | 1.4066 | 1.2049 | 0.9331 |
| 1.2265 | 1.4087 | 1.2098 | 0.9384 |
| 1.2354 | 1.4107 | 1.2151 | 0.9426 |
| 1.2439 | 1.4142 | 1.2242 | 0.9467 |
| 1.252  | 1.4151 | 1.2294 | 0.9535 |
| 1.2609 | 1.4158 | 1.2355 | 0.9576 |
| 1.2687 | 1.4163 | 1.2425 | 0.9618 |
| 1.2771 | 1.4195 | 1.2467 | 0.9694 |
| 1.2843 | 1.4195 | 1.2519 | 0.9757 |
| 1.2925 | 1.4199 | 1.2592 | 0.9801 |
| 1.3008 | 1.4192 | 1.265  | 0.982  |
| 1.3081 | 1.4187 | 1.2725 | 0.9878 |
| 1.3166 | 1.42   | 1.2789 | 0.9948 |
| 1.3222 | 1.4186 | 1.2843 | 0.9983 |
| 1.3309 | 1.4169 | 1.2893 | 1.0037 |
| 1.3384 | 1.4184 | 1.2964 | 1.0071 |
| 1.3468 | 1.4169 | 1.302  | 1.016  |
| 1.3536 | 1.4166 | 1.3077 | 1.0191 |
| 1.3613 | 1.4156 | 1.3161 | 1.0271 |
| 1.368  | 1.4161 | 1.32   | 1.0304 |
| 1.3738 | 1.4157 | 1.3272 | 1.034  |
| 1.3782 | 1.4151 | 1.334  | 1.0377 |
| 1.3848 | 1.4144 | 1.3368 | 1.0436 |
| 1.391  | 1.416  | 1.3428 | 1.0507 |
| 1.3939 | 1.4167 | 1.3481 | 1.0549 |
| 1.4003 | 1.4187 | 1.3578 | 1.0636 |
| 1.4001 | 1.4165 | 1.3613 | 1.0654 |
| 1.4025 | 1.4158 | 1.3667 | 1.0721 |
| 1.4043 | 1.4159 | 1.3725 | 1.0742 |
| 1.4062 | 1.4164 | 1.3764 | 1.0795 |
| 1.407  | 1.4158 | 1.3816 | 1.0861 |
| 1.406  | 1.4156 | 1.3849 | 1.0893 |
| 1.4055 | 1.4156 | 1.3901 | 1.0941 |
| 1.405  | 1.4159 | 1.3953 | 1.0987 |

|        |        |        |        |
|--------|--------|--------|--------|
| 1.403  | 1.4159 | 1.4003 | 1.1046 |
| 1.4024 | 1.4159 | 1.4023 | 1.1091 |
| 1.4007 | 1.4149 | 1.4072 | 1.1153 |
| 1.3989 | 1.4157 | 1.4107 | 1.1184 |
| 1.3989 | 1.4151 | 1.4128 | 1.1239 |
| 1.3977 | 1.4151 | 1.4161 | 1.1288 |
| 1.3968 | 1.4163 | 1.4171 | 1.1336 |
| 1.3957 | 1.4144 | 1.4214 | 1.1369 |
| 1.3946 | 1.4143 | 1.4195 | 1.1421 |
| 1.3946 | 1.4143 | 1.4235 | 1.147  |
| 1.3943 | 1.4143 | 1.4247 | 1.1508 |
| 1.3922 | 1.414  | 1.4255 | 1.1568 |
| 1.3934 | 1.4139 | 1.4252 | 1.1619 |
| 1.3934 | 1.4131 | 1.4263 | 1.1644 |
| 1.3932 | 1.4131 | 1.4271 | 1.171  |
| 1.3919 | 1.4133 | 1.4279 | 1.1782 |
| 1.3932 | 1.4136 | 1.4297 | 1.1821 |
| 1.3919 | 1.4134 | 1.4287 | 1.1862 |
| 1.3911 | 1.4139 | 1.4297 | 1.1901 |
| 1.3935 | 1.4137 | 1.4313 | 1.1956 |
| 1.3922 | 1.4133 | 1.431  | 1.1998 |
| 1.3922 | 1.4135 | 1.4314 | 1.2054 |
| 1.3924 | 1.4129 | 1.4324 | 1.2102 |
| 1.3924 | 1.4138 | 1.4326 | 1.2149 |
| 1.3922 | 1.4141 | 1.4321 | 1.2214 |
| 1.3919 | 1.4117 | 1.4321 | 1.2237 |
| 1.3919 | 1.4148 | 1.4317 | 1.2299 |
| 1.3921 | 1.4142 | 1.4324 | 1.2337 |
| 1.3934 | 1.4148 | 1.4326 | 1.2379 |
| 1.3937 | 1.4136 | 1.4328 | 1.242  |
| 1.3934 | 1.4143 | 1.4343 | 1.2458 |
| 1.3942 | 1.4144 | 1.4319 | 1.2502 |
| 1.3947 | 1.4154 | 1.4329 | 1.2555 |
| 1.3948 | 1.4137 | 1.4335 | 1.2599 |
| 1.3957 | 1.4137 | 1.4331 | 1.264  |
| 1.396  | 1.4136 | 1.4342 | 1.2668 |
| 1.3972 | 1.4127 | 1.435  | 1.2717 |
| 1.3984 | 1.4135 | 1.4341 | 1.2755 |
| 1.3977 | 1.4124 | 1.4339 | 1.279  |
| 1.398  | 1.4113 | 1.4332 | 1.2839 |
| 1.3988 | 1.4119 | 1.4332 | 1.2873 |
| 1.4003 | 1.411  | 1.4325 | 1.2897 |

|        |        |        |        |
|--------|--------|--------|--------|
| 1.3998 | 1.4114 | 1.4341 | 1.295  |
| 1.3995 | 1.4114 | 1.4338 | 1.2994 |

HSP 48

P1 P2 P3 P4 P5

| TIME | WT     | WT(GA 3) | WT(RAD 3) | NO DRUG | GA 3uM | GA 7uM | NOVO 100 | NOVO 250 |
|------|--------|----------|-----------|---------|--------|--------|----------|----------|
| 0    | 0.1894 | 0.2051   | 0.1892    | 0.1737  | 0.1651 | 0.1556 | 0.1984   | 0.2454   |
| 0.25 | 0.1844 | 0.1929   | 0.1812    | 0.1667  | 0.1585 | 0.1471 | 0.2013   | 0.2459   |
| 0.5  | 0.1833 | 0.1912   | 0.1787    | 0.167   | 0.1602 | 0.1452 | 0.2009   | 0.2489   |
| 0.75 | 0.1838 | 0.189    | 0.1758    | 0.1676  | 0.1596 | 0.1464 | 0.2001   | 0.2511   |
| 1    | 0.1843 | 0.1877   | 0.1818    | 0.167   | 0.1594 | 0.147  | 0.1988   | 0.2537   |
| 1.25 | 0.1867 | 0.1862   | 0.1836    | 0.1679  | 0.1591 | 0.1484 | 0.1986   | 0.2531   |
| 1.5  | 0.188  | 0.186    | 0.1823    | 0.1672  | 0.1625 | 0.1482 | 0.1989   | 0.2551   |

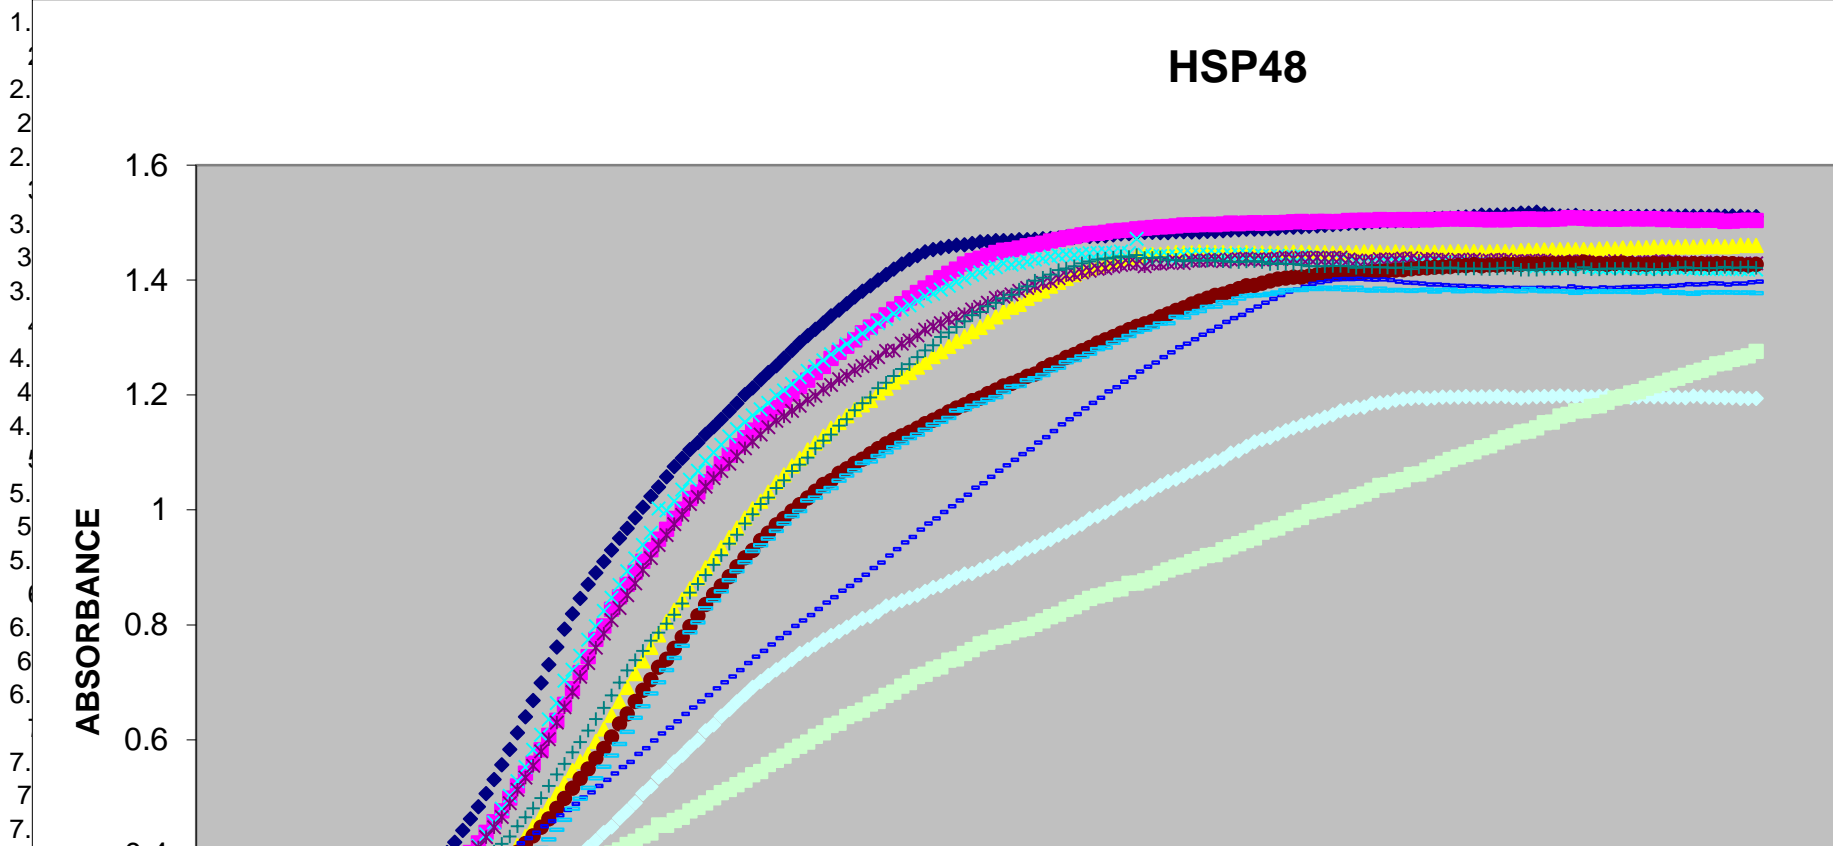

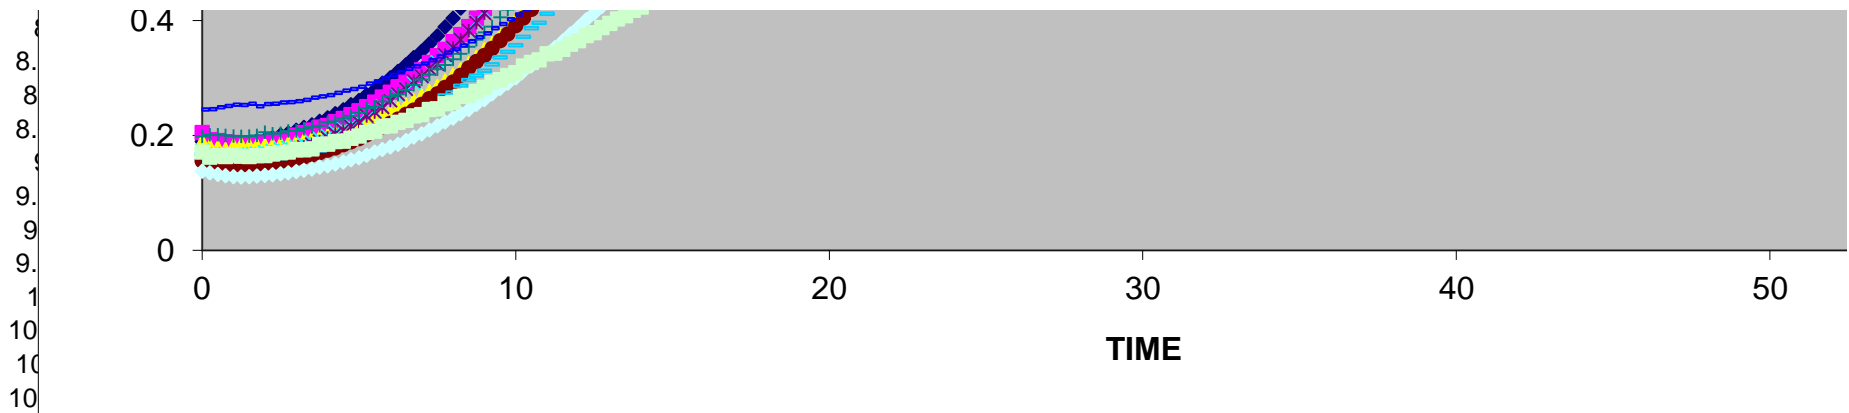

|       |        |        |        |        |        |        |        |        |
|-------|--------|--------|--------|--------|--------|--------|--------|--------|
| 11    | 0.6992 | 0.5825 | 0.4678 | 0.6085 | 0.5799 | 0.4476 | 0.4985 | 0.4495 |
| 11.25 | 0.7307 | 0.6075 | 0.4857 | 0.6356 | 0.601  | 0.4624 | 0.5195 | 0.4584 |
| 11.5  | 0.7614 | 0.6339 | 0.5059 | 0.6637 | 0.6298 | 0.4806 | 0.5397 | 0.4683 |
| 11.75 | 0.7927 | 0.6618 | 0.5242 | 0.703  | 0.6566 | 0.4982 | 0.5578 | 0.4781 |
| 12    | 0.8194 | 0.6889 | 0.5464 | 0.7218 | 0.6829 | 0.5156 | 0.5779 | 0.4885 |
| 12.25 | 0.8459 | 0.7168 | 0.5622 | 0.7465 | 0.7095 | 0.5322 | 0.5959 | 0.4997 |
| 12.5  | 0.8706 | 0.7448 | 0.5743 | 0.7739 | 0.7334 | 0.5493 | 0.6162 | 0.5086 |
| 12.75 | 0.8904 | 0.7744 | 0.5968 | 0.7976 | 0.7601 | 0.5673 | 0.6362 | 0.5197 |
| 13    | 0.9099 | 0.7982 | 0.6186 | 0.8244 | 0.7846 | 0.5848 | 0.6556 | 0.5303 |
| 13.25 | 0.9301 | 0.8269 | 0.6426 | 0.847  | 0.8081 | 0.6051 | 0.6773 | 0.5412 |
| 13.5  | 0.9508 | 0.849  | 0.6665 | 0.8695 | 0.8291 | 0.6276 | 0.6994 | 0.5525 |
| 13.75 | 0.9679 | 0.8707 | 0.6913 | 0.8931 | 0.8517 | 0.6451 | 0.7205 | 0.5616 |
| 14    | 0.986  | 0.8918 | 0.7152 | 0.9156 | 0.8722 | 0.6665 | 0.7384 | 0.5752 |
| 14.25 | 1.0047 | 0.9106 | 0.7372 | 0.9387 | 0.8955 | 0.6859 | 0.7546 | 0.5856 |
| 14.5  | 1.0233 | 0.9308 | 0.7608 | 0.9599 | 0.9159 | 0.7045 | 0.7723 | 0.5985 |
| 14.75 | 1.0397 | 0.9491 | 0.7825 | 1.0024 | 0.9387 | 0.7261 | 0.7865 | 0.6107 |
| 15    | 1.0577 | 0.966  | 0.8057 | 0.999  | 0.9564 | 0.74   | 0.8022 | 0.6212 |
| 15.25 | 1.0753 | 0.9853 | 0.8251 | 1.0154 | 0.9751 | 0.7588 | 0.8173 | 0.6319 |
| 15.5  | 1.0897 | 1.0015 | 0.8439 | 1.0355 | 0.991  | 0.7783 | 0.8372 | 0.6447 |
| 15.75 | 1.1049 | 1.0198 | 0.8628 | 1.0524 | 1.0103 | 0.7972 | 0.8559 | 0.6562 |
| 16    | 1.1171 | 1.031  | 0.8817 | 1.0682 | 1.0222 | 0.8158 | 0.8708 | 0.6669 |
| 16.25 | 1.1316 | 1.0487 | 0.8996 | 1.0856 | 1.0402 | 0.8353 | 0.8866 | 0.6775 |
| 16.5  | 1.1443 | 1.0637 | 0.9165 | 1.0999 | 1.0555 | 0.8526 | 0.9042 | 0.6897 |
| 16.75 | 1.1579 | 1.0806 | 0.9342 | 1.1131 | 1.0677 | 0.8678 | 0.9213 | 0.6998 |
| 17    | 1.1715 | 1.0952 | 0.9517 | 1.1278 | 1.0806 | 0.884  | 0.9409 | 0.7101 |
| 17.25 | 1.1858 | 1.1114 | 0.9682 | 1.1406 | 1.093  | 0.901  | 0.9566 | 0.7214 |
| 17.5  | 1.2004 | 1.1256 | 0.9855 | 1.1526 | 1.107  | 0.9164 | 0.9761 | 0.7336 |
| 17.75 | 1.2123 | 1.1388 | 1.0016 | 1.1647 | 1.1187 | 0.9297 | 0.9922 | 0.7444 |
| 18    | 1.2261 | 1.1522 | 1.015  | 1.1753 | 1.1313 | 0.9468 | 1.0101 | 0.7545 |
| 18.25 | 1.239  | 1.1664 | 1.0307 | 1.1859 | 1.1436 | 0.9594 | 1.0216 | 0.7656 |

|       |        |        |        |        |        |        |        |        |
|-------|--------|--------|--------|--------|--------|--------|--------|--------|
| 18.5  | 1.251  | 1.1779 | 1.0478 | 1.199  | 1.1552 | 0.9739 | 1.0382 | 0.777  |
| 18.75 | 1.2641 | 1.1907 | 1.0607 | 1.2081 | 1.163  | 0.9853 | 1.0515 | 0.786  |
| 19    | 1.2773 | 1.2018 | 1.0765 | 1.2189 | 1.1721 | 0.9979 | 1.0677 | 0.7981 |
| 19.25 | 1.2907 | 1.2145 | 1.0891 | 1.2308 | 1.1813 | 1.0091 | 1.0789 | 0.8074 |
| 19.5  | 1.3032 | 1.2259 | 1.1041 | 1.242  | 1.1917 | 1.0208 | 1.0912 | 0.817  |
| 19.75 | 1.3141 | 1.239  | 1.1166 | 1.2498 | 1.1982 | 1.0326 | 1.1071 | 0.8275 |
| 20    | 1.3251 | 1.2497 | 1.1283 | 1.2603 | 1.2096 | 1.0444 | 1.1206 | 0.8385 |
| 20.25 | 1.3374 | 1.2637 | 1.1419 | 1.2706 | 1.2171 | 1.0508 | 1.1308 | 0.8479 |
| 20.5  | 1.3474 | 1.2743 | 1.1521 | 1.279  | 1.2271 | 1.0637 | 1.1467 | 0.8593 |
| 20.75 | 1.3589 | 1.2848 | 1.1637 | 1.2885 | 1.2335 | 1.0712 | 1.1578 | 0.8676 |
| 21    | 1.3704 | 1.2956 | 1.1744 | 1.2979 | 1.2432 | 1.0809 | 1.1731 | 0.8774 |
| 21.25 | 1.3806 | 1.3083 | 1.1829 | 1.3068 | 1.2503 | 1.0879 | 1.1858 | 0.8874 |
| 21.5  | 1.39   | 1.3184 | 1.1906 | 1.3156 | 1.2566 | 1.0974 | 1.1957 | 0.8986 |
| 21.75 | 1.3999 | 1.3289 | 1.2037 | 1.3247 | 1.2658 | 1.1067 | 1.2116 | 0.9084 |
| 22    | 1.4093 | 1.3395 | 1.2116 | 1.3319 | 1.2764 | 1.1149 | 1.2211 | 0.9206 |
| 22.25 | 1.4189 | 1.3493 | 1.2223 | 1.3416 | 1.2775 | 1.1223 | 1.2331 | 0.9319 |
| 22.5  | 1.4278 | 1.3589 | 1.2316 | 1.3488 | 1.289  | 1.129  | 1.2452 | 0.9432 |
| 22.75 | 1.4356 | 1.369  | 1.2391 | 1.3561 | 1.2946 | 1.1351 | 1.2537 | 0.953  |
| 23    | 1.4425 | 1.3781 | 1.2485 | 1.3638 | 1.3036 | 1.1422 | 1.2656 | 0.9659 |
| 23.25 | 1.4488 | 1.3861 | 1.257  | 1.3717 | 1.3135 | 1.1498 | 1.2774 | 0.9765 |
| 23.5  | 1.4527 | 1.3947 | 1.2667 | 1.3763 | 1.3191 | 1.1561 | 1.2863 | 0.9849 |
| 23.75 | 1.4559 | 1.4037 | 1.2752 | 1.3832 | 1.325  | 1.1626 | 1.3006 | 0.9962 |
| 24    | 1.4583 | 1.4119 | 1.2845 | 1.3901 | 1.3323 | 1.1704 | 1.3086 | 1.0065 |
| 24.25 | 1.4609 | 1.4188 | 1.2937 | 1.3966 | 1.335  | 1.1772 | 1.3182 | 1.0161 |
| 24.5  | 1.4615 | 1.4276 | 1.3014 | 1.403  | 1.3406 | 1.183  | 1.328  | 1.0262 |
| 24.75 | 1.4635 | 1.4341 | 1.3101 | 1.4088 | 1.3487 | 1.1903 | 1.3385 | 1.0385 |
| 25    | 1.466  | 1.4379 | 1.3177 | 1.4136 | 1.3531 | 1.1943 | 1.3441 | 1.0465 |
| 25.25 | 1.4669 | 1.4431 | 1.3269 | 1.4199 | 1.3606 | 1.2025 | 1.3542 | 1.0578 |
| 25.5  | 1.4687 | 1.4476 | 1.3358 | 1.4225 | 1.3689 | 1.2083 | 1.3606 | 1.0683 |
| 25.75 | 1.4687 | 1.4518 | 1.345  | 1.4287 | 1.3711 | 1.2154 | 1.3682 | 1.0773 |
| 26    | 1.4682 | 1.453  | 1.3526 | 1.4268 | 1.3752 | 1.22   | 1.3744 | 1.0871 |
| 26.25 | 1.4704 | 1.4557 | 1.3577 | 1.4295 | 1.3811 | 1.2253 | 1.3835 | 1.0972 |
| 26.5  | 1.4702 | 1.4595 | 1.368  | 1.4316 | 1.386  | 1.2322 | 1.3889 | 1.1052 |
| 26.75 | 1.4706 | 1.4619 | 1.3756 | 1.4357 | 1.3899 | 1.2365 | 1.3988 | 1.1169 |
| 27    | 1.4716 | 1.4639 | 1.3808 | 1.4373 | 1.3951 | 1.2456 | 1.4038 | 1.1266 |
| 27.25 | 1.4725 | 1.4677 | 1.3894 | 1.4407 | 1.3975 | 1.2523 | 1.4096 | 1.1373 |
| 27.5  | 1.473  | 1.4709 | 1.396  | 1.443  | 1.4032 | 1.2569 | 1.4175 | 1.1486 |
| 27.75 | 1.4747 | 1.4735 | 1.4025 | 1.4448 | 1.4082 | 1.2651 | 1.4203 | 1.1577 |
| 28    | 1.4747 | 1.4758 | 1.4095 | 1.4434 | 1.4098 | 1.2703 | 1.4242 | 1.1669 |
| 28.25 | 1.4772 | 1.4784 | 1.4156 | 1.4456 | 1.4134 | 1.2768 | 1.4292 | 1.1769 |
| 28.5  | 1.4758 | 1.4806 | 1.4201 | 1.4467 | 1.4161 | 1.2825 | 1.4324 | 1.1859 |
| 28.75 | 1.4763 | 1.4813 | 1.4239 | 1.4465 | 1.4193 | 1.2903 | 1.4354 | 1.1953 |

|       |        |        |        |        |        |        |        |        |
|-------|--------|--------|--------|--------|--------|--------|--------|--------|
| 29    | 1.4771 | 1.4829 | 1.4289 | 1.4476 | 1.4204 | 1.2958 | 1.4375 | 1.206  |
| 29.25 | 1.4786 | 1.485  | 1.4341 | 1.4471 | 1.4235 | 1.3013 | 1.4388 | 1.2137 |
| 29.5  | 1.4803 | 1.4861 | 1.4367 | 1.4494 | 1.426  | 1.3076 | 1.4413 | 1.2229 |
| 29.75 | 1.4807 | 1.4866 | 1.4387 | 1.4467 | 1.4287 | 1.3135 | 1.4401 | 1.2307 |
| 30    | 1.4823 | 1.4892 | 1.4412 | 1.4716 | 1.428  | 1.3191 | 1.4435 | 1.2409 |
| 30.25 | 1.4831 | 1.49   | 1.4444 | 1.4442 | 1.4242 | 1.3237 | 1.4385 | 1.249  |
| 30.5  | 1.4829 | 1.4913 | 1.4444 | 1.4416 | 1.4289 | 1.3281 | 1.4386 | 1.2563 |
| 30.75 | 1.4823 | 1.4923 | 1.4446 | 1.4417 | 1.4283 | 1.336  | 1.4394 | 1.266  |
| 31    | 1.4825 | 1.4929 | 1.4466 | 1.4413 | 1.4302 | 1.3412 | 1.4352 | 1.274  |
| 31.25 | 1.4843 | 1.4939 | 1.448  | 1.4418 | 1.4318 | 1.347  | 1.4352 | 1.283  |
| 31.5  | 1.4842 | 1.496  | 1.4475 | 1.4447 | 1.4294 | 1.3517 | 1.4329 | 1.289  |
| 31.75 | 1.4837 | 1.4956 | 1.4475 | 1.4437 | 1.4339 | 1.3583 | 1.4347 | 1.2968 |
| 32    | 1.4837 | 1.4964 | 1.4488 | 1.4445 | 1.4334 | 1.363  | 1.4336 | 1.3048 |
| 32.25 | 1.4847 | 1.4969 | 1.4483 | 1.4437 | 1.4339 | 1.3683 | 1.4342 | 1.3114 |
| 32.5  | 1.4848 | 1.4964 | 1.448  | 1.4446 | 1.4352 | 1.373  | 1.4338 | 1.3189 |
| 32.75 | 1.4858 | 1.4974 | 1.448  | 1.4431 | 1.4329 | 1.3756 | 1.4327 | 1.3272 |
| 33    | 1.4867 | 1.4992 | 1.4467 | 1.4432 | 1.4355 | 1.3797 | 1.4318 | 1.3337 |
| 33.25 | 1.4876 | 1.498  | 1.4476 | 1.4448 | 1.436  | 1.3852 | 1.4312 | 1.3391 |
| 33.5  | 1.4885 | 1.4993 | 1.4481 | 1.4446 | 1.4373 | 1.39   | 1.4325 | 1.347  |
| 33.75 | 1.4883 | 1.4994 | 1.4469 | 1.4427 | 1.4356 | 1.3905 | 1.4326 | 1.3539 |
| 34    | 1.4888 | 1.4988 | 1.4474 | 1.4422 | 1.4355 | 1.3943 | 1.431  | 1.3603 |
| 34.25 | 1.4892 | 1.4995 | 1.4471 | 1.4415 | 1.436  | 1.3981 | 1.428  | 1.3669 |
| 34.5  | 1.4899 | 1.4996 | 1.4474 | 1.4424 | 1.4372 | 1.4015 | 1.429  | 1.374  |
| 34.75 | 1.4919 | 1.5003 | 1.4472 | 1.4404 | 1.4391 | 1.4031 | 1.428  | 1.3799 |
| 35    | 1.492  | 1.5014 | 1.4486 | 1.4405 | 1.4368 | 1.405  | 1.428  | 1.3834 |
| 35.25 | 1.4922 | 1.502  | 1.4486 | 1.4416 | 1.4386 | 1.405  | 1.426  | 1.3884 |
| 35.5  | 1.4933 | 1.5004 | 1.4477 | 1.4396 | 1.4383 | 1.4067 | 1.4239 | 1.3931 |
| 35.75 | 1.4939 | 1.5019 | 1.4479 | 1.4398 | 1.4387 | 1.409  | 1.4237 | 1.3963 |
| 36    | 1.4951 | 1.5018 | 1.4476 | 1.4382 | 1.438  | 1.4103 | 1.4241 | 1.3981 |
| 36.25 | 1.4965 | 1.5015 | 1.4469 | 1.4373 | 1.4382 | 1.4107 | 1.4245 | 1.401  |
| 36.5  | 1.4976 | 1.5021 | 1.4473 | 1.4368 | 1.4387 | 1.4113 | 1.4243 | 1.4014 |
| 36.75 | 1.4983 | 1.5037 | 1.4481 | 1.4343 | 1.4356 | 1.4117 | 1.4238 | 1.4017 |
| 37    | 1.4992 | 1.5034 | 1.4477 | 1.4306 | 1.4342 | 1.4114 | 1.4213 | 1.4021 |
| 37.25 | 1.4997 | 1.504  | 1.449  | 1.4309 | 1.4325 | 1.4127 | 1.4233 | 1.4009 |
| 37.5  | 1.5011 | 1.5037 | 1.4489 | 1.4306 | 1.4335 | 1.4145 | 1.4223 | 1.4008 |
| 37.75 | 1.502  | 1.505  | 1.4486 | 1.4308 | 1.4359 | 1.4154 | 1.4224 | 1.4011 |
| 38    | 1.5029 | 1.5047 | 1.4475 | 1.4299 | 1.435  | 1.4161 | 1.4218 | 1.4001 |
| 38.25 | 1.5029 | 1.5046 | 1.449  | 1.4298 | 1.4355 | 1.417  | 1.4214 | 1.3974 |
| 38.5  | 1.504  | 1.505  | 1.4481 | 1.4294 | 1.4371 | 1.4177 | 1.4217 | 1.3958 |
| 38.75 | 1.5035 | 1.5042 | 1.448  | 1.4292 | 1.4379 | 1.4194 | 1.4191 | 1.3952 |
| 39    | 1.5042 | 1.505  | 1.4488 | 1.4302 | 1.4335 | 1.4207 | 1.4224 | 1.3937 |
| 39.25 | 1.5058 | 1.5049 | 1.4482 | 1.4301 | 1.4369 | 1.4214 | 1.4214 | 1.3923 |



|       |        |        |        |        |        |        |        |        |
|-------|--------|--------|--------|--------|--------|--------|--------|--------|
| 39.5  | 1.507  | 1.5052 | 1.4485 | 1.4286 | 1.4348 | 1.4221 | 1.4211 | 1.3922 |
| 39.75 | 1.5073 | 1.506  | 1.4484 | 1.4301 | 1.4357 | 1.4229 | 1.4202 | 1.3913 |
| 40    | 1.5077 | 1.5062 | 1.4489 | 1.4309 | 1.4325 | 1.4234 | 1.4216 | 1.3902 |
| 40.25 | 1.5093 | 1.5063 | 1.4496 | 1.4298 | 1.4353 | 1.4248 | 1.4199 | 1.3897 |
| 40.5  | 1.5096 | 1.506  | 1.4489 | 1.4287 | 1.4337 | 1.4249 | 1.4193 | 1.3889 |
| 40.75 | 1.5108 | 1.5059 | 1.4494 | 1.4276 | 1.4356 | 1.4265 | 1.4198 | 1.3887 |
| 41    | 1.5129 | 1.5053 | 1.4485 | 1.4294 | 1.4331 | 1.4243 | 1.4193 | 1.3881 |
| 41.25 | 1.5127 | 1.5048 | 1.4491 | 1.4274 | 1.434  | 1.4263 | 1.419  | 1.3874 |
| 41.5  | 1.513  | 1.5052 | 1.4495 | 1.4276 | 1.4351 | 1.4258 | 1.4199 | 1.3871 |
| 41.75 | 1.513  | 1.5045 | 1.4496 | 1.427  | 1.4349 | 1.4275 | 1.4211 | 1.3862 |
| 42    | 1.5143 | 1.506  | 1.4492 | 1.4269 | 1.432  | 1.4266 | 1.421  | 1.3868 |
| 42.25 | 1.5164 | 1.506  | 1.4512 | 1.4266 | 1.4329 | 1.4275 | 1.4176 | 1.3861 |
| 42.5  | 1.5166 | 1.5062 | 1.4516 | 1.4249 | 1.433  | 1.4283 | 1.4178 | 1.3859 |
| 42.75 | 1.518  | 1.506  | 1.4518 | 1.424  | 1.4335 | 1.4276 | 1.418  | 1.3868 |
| 43    | 1.5154 | 1.5053 | 1.4522 | 1.4249 | 1.434  | 1.4286 | 1.4197 | 1.386  |
| 43.25 | 1.5129 | 1.5059 | 1.4522 | 1.424  | 1.4315 | 1.4283 | 1.4203 | 1.3867 |
| 43.5  | 1.5111 | 1.5064 | 1.4527 | 1.4243 | 1.4303 | 1.4284 | 1.4194 | 1.3852 |
| 43.75 | 1.5114 | 1.5084 | 1.453  | 1.4235 | 1.4316 | 1.4293 | 1.4202 | 1.3887 |
| 44    | 1.5125 | 1.5078 | 1.4529 | 1.4309 | 1.4326 | 1.4286 | 1.4181 | 1.3868 |
| 44.25 | 1.5102 | 1.5073 | 1.4529 | 1.424  | 1.4322 | 1.4311 | 1.4222 | 1.3856 |
| 44.5  | 1.5105 | 1.5065 | 1.4523 | 1.4223 | 1.4288 | 1.4288 | 1.4191 | 1.385  |
| 44.75 | 1.5104 | 1.5065 | 1.454  | 1.4217 | 1.4307 | 1.4283 | 1.4183 | 1.3869 |
| 45    | 1.5092 | 1.5064 | 1.4543 | 1.4217 | 1.4302 | 1.4274 | 1.4203 | 1.3863 |
| 45.25 | 1.5105 | 1.5057 | 1.4541 | 1.4231 | 1.4327 | 1.429  | 1.4195 | 1.3866 |
| 45.5  | 1.5103 | 1.5065 | 1.4557 | 1.4216 | 1.4282 | 1.4293 | 1.4198 | 1.3875 |
| 45.75 | 1.51   | 1.5067 | 1.4559 | 1.4217 | 1.429  | 1.4283 | 1.4191 | 1.3883 |
| 46    | 1.5108 | 1.5061 | 1.4561 | 1.4222 | 1.431  | 1.427  | 1.4202 | 1.3881 |
| 46.25 | 1.5109 | 1.5064 | 1.456  | 1.4199 | 1.4305 | 1.427  | 1.4191 | 1.3889 |
| 46.5  | 1.511  | 1.5069 | 1.4571 | 1.4224 | 1.4314 | 1.4291 | 1.4185 | 1.3895 |
| 46.75 | 1.511  | 1.5052 | 1.4577 | 1.4212 | 1.433  | 1.428  | 1.4191 | 1.3887 |
| 47    | 1.5111 | 1.5059 | 1.4574 | 1.4217 | 1.432  | 1.4282 | 1.4191 | 1.3897 |
| 47.25 | 1.5102 | 1.5042 | 1.4571 | 1.4208 | 1.4303 | 1.429  | 1.4209 | 1.3911 |
| 47.5  | 1.5112 | 1.5044 | 1.4583 | 1.4209 | 1.4307 | 1.4273 | 1.422  | 1.3926 |
| 47.75 | 1.5109 | 1.5036 | 1.4575 | 1.4189 | 1.4287 | 1.4282 | 1.4204 | 1.392  |
| 48    | 1.511  | 1.5046 | 1.4582 | 1.4195 | 1.4306 | 1.4286 | 1.4208 | 1.3928 |
| 48.25 | 1.511  | 1.5042 | 1.4587 | 1.4187 | 1.4291 | 1.4274 | 1.4205 | 1.3944 |
| 48.5  | 1.5111 | 1.504  | 1.4592 | 1.4189 | 1.4305 | 1.4282 | 1.4206 | 1.3936 |
| 48.75 | 1.5107 | 1.5019 | 1.4578 | 1.4187 | 1.4283 | 1.4286 | 1.4229 | 1.392  |
| 49    | 1.5112 | 1.5026 | 1.4586 | 1.4188 | 1.4289 | 1.4283 | 1.4211 | 1.394  |
| 49.25 | 1.5109 | 1.5034 | 1.4604 | 1.4188 | 1.4284 | 1.4272 | 1.4218 | 1.3938 |
| 49.5  | 1.5094 | 1.504  | 1.4603 | 1.4179 | 1.4283 | 1.4263 | 1.4229 | 1.3959 |
| 49.75 | 1.5105 | 1.5038 | 1.4602 | 1.4183 | 1.4291 | 1.4271 | 1.4211 | 1.397  |

| P6           | P7            | P8            |
|--------------|---------------|---------------|
| <b>RAD 3</b> | <b>RAD 10</b> | <b>RAD 30</b> |
| 0.1677       | 0.1378        | 0.1708        |
| 0.1555       | 0.1346        | 0.1622        |
| 0.1568       | 0.1323        | 0.1647        |
| 0.1548       | 0.1299        | 0.1635        |
| 0.1556       | 0.1283        | 0.1659        |
| 0.1586       | 0.1278        | 0.1641        |
| 0.1556       | 0.1284        | 0.1634        |
|              |               | 651           |
|              |               | 651           |
|              |               | 682           |
|              |               | 697           |
|              |               | 708           |
|              |               | 755           |
|              |               | 749           |
|              |               | 769           |
|              |               | 846           |
|              |               | 849           |
|              |               | 893           |
|              |               | 19            |
|              |               | 949           |
|              |               | 991           |
|              |               | 048           |
|              |               | 207           |
|              |               | 158           |
|              |               | 217           |
|              |               | 231           |
|              |               | 262           |
|              |               | 339           |
|              |               | 361           |
|              |               | 452           |
|              |               | 465           |
|              |               | 552           |

- ◆ WT
- WT(GA 3)
- ▲ WT(RAD 3)
- × NO DRUG
- \* GA 3uM
- GA 7uM
- + NOVO 100
- NOVO 250
- RAD 3
- RAD 10

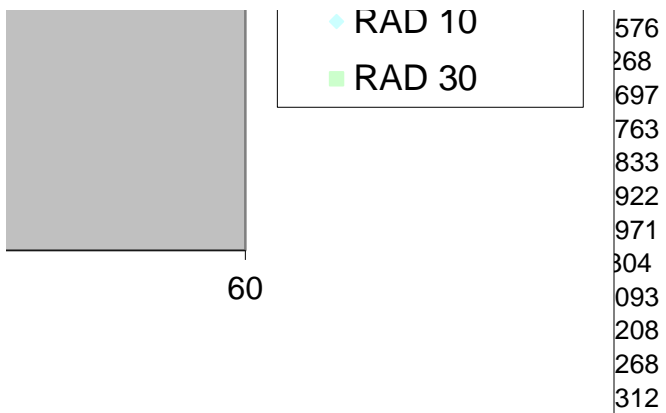

|        |        |        |
|--------|--------|--------|
| 0.4116 | 0.3425 | 0.342  |
| 0.4266 | 0.3525 | 0.3434 |
| 0.4431 | 0.3642 | 0.3497 |
| 0.4607 | 0.3768 | 0.3586 |
| 0.4803 | 0.3885 | 0.3646 |
| 0.4973 | 0.4008 | 0.3735 |
| 0.5165 | 0.4127 | 0.3787 |
| 0.533  | 0.4247 | 0.3876 |
| 0.553  | 0.4382 | 0.3949 |
| 0.5723 | 0.4486 | 0.4029 |
| 0.5928 | 0.4633 | 0.408  |
| 0.614  | 0.4762 | 0.4178 |
| 0.6381 | 0.4904 | 0.4232 |
| 0.6583 | 0.506  | 0.433  |
| 0.6804 | 0.5187 | 0.4376 |
| 0.7    | 0.535  | 0.4515 |
| 0.7211 | 0.5463 | 0.4512 |
| 0.7424 | 0.5615 | 0.4595 |
| 0.7637 | 0.5731 | 0.4653 |
| 0.7871 | 0.5869 | 0.4761 |
| 0.8039 | 0.599  | 0.4823 |
| 0.8284 | 0.6154 | 0.4901 |
| 0.8425 | 0.6262 | 0.4988 |
| 0.8583 | 0.6411 | 0.5081 |
| 0.8776 | 0.6526 | 0.5137 |
| 0.8934 | 0.6659 | 0.5221 |
| 0.9091 | 0.6784 | 0.5295 |
| 0.9286 | 0.691  | 0.5389 |
| 0.9386 | 0.7014 | 0.5446 |
| 0.9503 | 0.7117 | 0.557  |

|        |        |        |
|--------|--------|--------|
| 0.9635 | 0.7219 | 0.5643 |
| 0.976  | 0.7301 | 0.5715 |
| 0.989  | 0.7398 | 0.5813 |
| 0.9978 | 0.75   | 0.5888 |
| 1.0163 | 0.7571 | 0.5962 |
| 1.0216 | 0.7652 | 0.6062 |
| 1.0326 | 0.7741 | 0.6122 |
| 1.0382 | 0.7812 | 0.6248 |
| 1.0506 | 0.788  | 0.6289 |
| 1.0597 | 0.796  | 0.6405 |
| 1.0686 | 0.8035 | 0.6457 |
| 1.0816 | 0.8108 | 0.6518 |
| 1.0845 | 0.8149 | 0.6623 |
| 1.0939 | 0.8224 | 0.6668 |
| 1.1006 | 0.8327 | 0.677  |
| 1.109  | 0.8366 | 0.6828 |
| 1.1168 | 0.8418 | 0.6935 |
| 1.1251 | 0.8468 | 0.6996 |
| 1.131  | 0.8513 | 0.7101 |
| 1.1395 | 0.8582 | 0.7139 |
| 1.1485 | 0.8649 | 0.7227 |
| 1.1531 | 0.8684 | 0.727  |
| 1.1598 | 0.8756 | 0.7385 |
| 1.1726 | 0.8818 | 0.7407 |
| 1.1751 | 0.8882 | 0.7501 |
| 1.1813 | 0.8895 | 0.757  |
| 1.1861 | 0.896  | 0.767  |
| 1.1915 | 0.9014 | 0.7694 |
| 1.196  | 0.9068 | 0.7779 |
| 1.2049 | 0.9151 | 0.7801 |
| 1.2143 | 0.9169 | 0.7864 |
| 1.2157 | 0.9251 | 0.7912 |
| 1.2255 | 0.9319 | 0.7938 |
| 1.2293 | 0.936  | 0.8007 |
| 1.2344 | 0.9428 | 0.8068 |
| 1.2428 | 0.9484 | 0.8143 |
| 1.2474 | 0.9561 | 0.8187 |
| 1.257  | 0.9617 | 0.8272 |
| 1.2609 | 0.969  | 0.8314 |
| 1.2669 | 0.9751 | 0.8387 |
| 1.2718 | 0.9844 | 0.8461 |
| 1.2796 | 0.9892 | 0.8503 |

|        |        |        |
|--------|--------|--------|
| 1.2826 | 0.996  | 0.8532 |
| 1.2906 | 1.0022 | 0.8609 |
| 1.2957 | 1.0119 | 0.8625 |
| 1.3027 | 1.016  | 0.8723 |
| 1.3096 | 1.0235 | 0.8726 |
| 1.3139 | 1.0279 | 0.8764 |
| 1.3184 | 1.0351 | 0.8815 |
| 1.3242 | 1.0424 | 0.8892 |
| 1.3246 | 1.049  | 0.8954 |
| 1.3362 | 1.0537 | 0.9003 |
| 1.3351 | 1.0598 | 0.9038 |
| 1.3424 | 1.0671 | 0.9101 |
| 1.346  | 1.0726 | 0.9148 |
| 1.3534 | 1.0784 | 0.9204 |
| 1.3536 | 1.0847 | 0.9222 |
| 1.3618 | 1.0889 | 0.9306 |
| 1.3598 | 1.0989 | 0.9354 |
| 1.3678 | 1.1029 | 0.9414 |
| 1.372  | 1.1107 | 0.9469 |
| 1.3732 | 1.1182 | 0.9513 |
| 1.3739 | 1.1228 | 0.9612 |
| 1.3762 | 1.1258 | 0.9652 |
| 1.3785 | 1.1321 | 0.9683 |
| 1.382  | 1.1378 | 0.9764 |
| 1.3826 | 1.143  | 0.9822 |
| 1.3826 | 1.1473 | 0.9868 |
| 1.3857 | 1.1517 | 0.9966 |
| 1.3846 | 1.1561 | 0.9994 |
| 1.3865 | 1.1609 | 1.0026 |
| 1.3846 | 1.1658 | 1.0072 |
| 1.3871 | 1.1724 | 1.0133 |
| 1.3834 | 1.1747 | 1.0168 |
| 1.3867 | 1.1782 | 1.0232 |
| 1.3827 | 1.1791 | 1.0275 |
| 1.3817 | 1.1849 | 1.0341 |
| 1.3847 | 1.1864 | 1.0425 |
| 1.3815 | 1.1873 | 1.0437 |
| 1.3828 | 1.191  | 1.05   |
| 1.382  | 1.1929 | 1.0526 |
| 1.3811 | 1.1942 | 1.0615 |
| 1.382  | 1.1954 | 1.0625 |
| 1.3831 | 1.1936 | 1.0695 |

|        |        |        |
|--------|--------|--------|
| 1.3798 | 1.1949 | 1.0748 |
| 1.3825 | 1.1961 | 1.0808 |
| 1.383  | 1.1963 | 1.0875 |
| 1.3803 | 1.196  | 1.0921 |
| 1.381  | 1.1973 | 1.0965 |
| 1.3827 | 1.1964 | 1.1009 |
| 1.3813 | 1.1968 | 1.108  |
| 1.3804 | 1.1969 | 1.1114 |
| 1.3818 | 1.1977 | 1.118  |
| 1.3817 | 1.1972 | 1.1254 |
| 1.381  | 1.1957 | 1.1286 |
| 1.3803 | 1.1947 | 1.1356 |
| 1.3843 | 1.1962 | 1.1373 |
| 1.3814 | 1.1968 | 1.143  |
| 1.3803 | 1.1975 | 1.1517 |
| 1.3809 | 1.1975 | 1.1526 |
| 1.3806 | 1.1985 | 1.1635 |
| 1.3801 | 1.1978 | 1.1663 |
| 1.3778 | 1.1962 | 1.1723 |
| 1.3802 | 1.1972 | 1.1726 |
| 1.3792 | 1.1964 | 1.1798 |
| 1.3813 | 1.1972 | 1.1814 |
| 1.3792 | 1.1982 | 1.187  |
| 1.3805 | 1.1958 | 1.1945 |
| 1.3794 | 1.197  | 1.1974 |
| 1.38   | 1.1959 | 1.2036 |
| 1.3783 | 1.1965 | 1.2058 |
| 1.3792 | 1.1971 | 1.2117 |
| 1.3813 | 1.197  | 1.2162 |
| 1.3805 | 1.1969 | 1.2201 |
| 1.3779 | 1.1963 | 1.2257 |
| 1.3788 | 1.1963 | 1.2289 |
| 1.3773 | 1.1953 | 1.2341 |
| 1.3762 | 1.1981 | 1.2392 |
| 1.3785 | 1.1966 | 1.2427 |
| 1.3786 | 1.1964 | 1.2473 |
| 1.3785 | 1.1959 | 1.254  |
| 1.3788 | 1.1951 | 1.2555 |
| 1.378  | 1.1948 | 1.2619 |
| 1.3775 | 1.1939 | 1.2649 |
| 1.3784 | 1.1939 | 1.2678 |
| 1.377  | 1.194  | 1.2757 |

KTR4

|      |        |          |           | D1      | D2     | D3     | D4       |
|------|--------|----------|-----------|---------|--------|--------|----------|
| TIME | WT     | WT(GA 3) | WT(RAD 3) | NO DRUG | GA 3uM | GA 7uM | NOVO 100 |
| 0    | 0.1894 | 0.2051   | 0.1892    | 0.1579  | 0.167  | 0.1537 | 0.2147   |
| 0.25 | 0.1844 | 0.1929   | 0.1812    | 0.1507  | 0.1565 | 0.1475 | 0.2169   |
| 0.5  | 0.1833 | 0.1912   | 0.1787    | 0.1484  | 0.1541 | 0.1427 | 0.2183   |
| 0.75 | 0.1838 | 0.189    | 0.1758    | 0.1456  | 0.1509 | 0.1412 | 0.2175   |
| 1    | 0.1843 | 0.1877   | 0.1818    | 0.1426  | 0.1501 | 0.1426 | 0.217    |
| 1.25 | 0.1867 | 0.1862   | 0.1836    | 0.1435  | 0.1506 | 0.1426 | 0.2177   |
| 1.5  | 0.188  | 0.186    | 0.1823    | 0.1431  | 0.1513 | 0.1433 | 0.2195   |

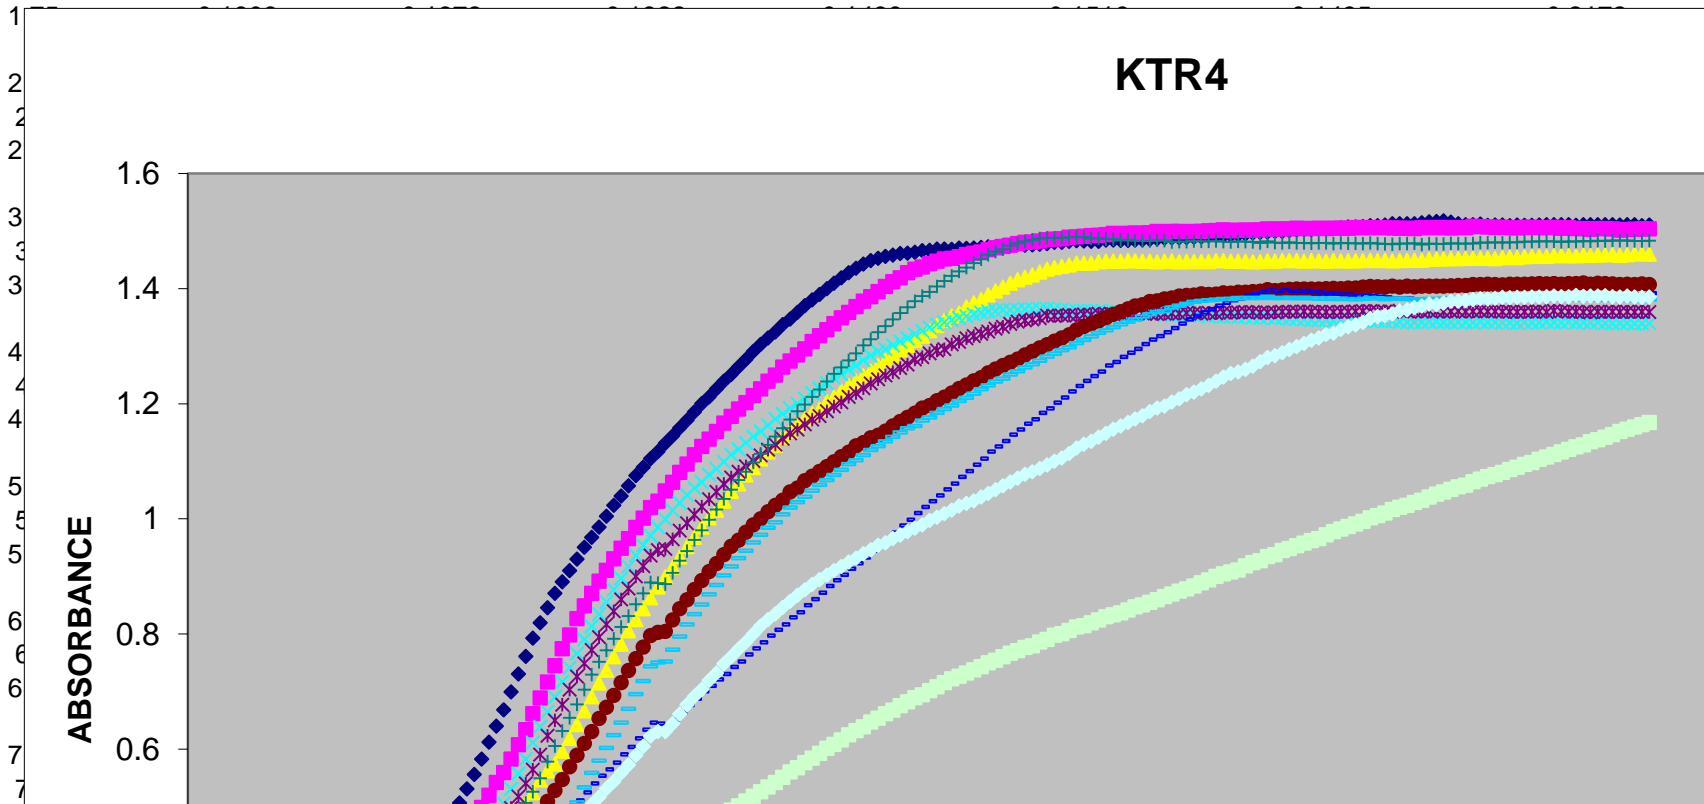

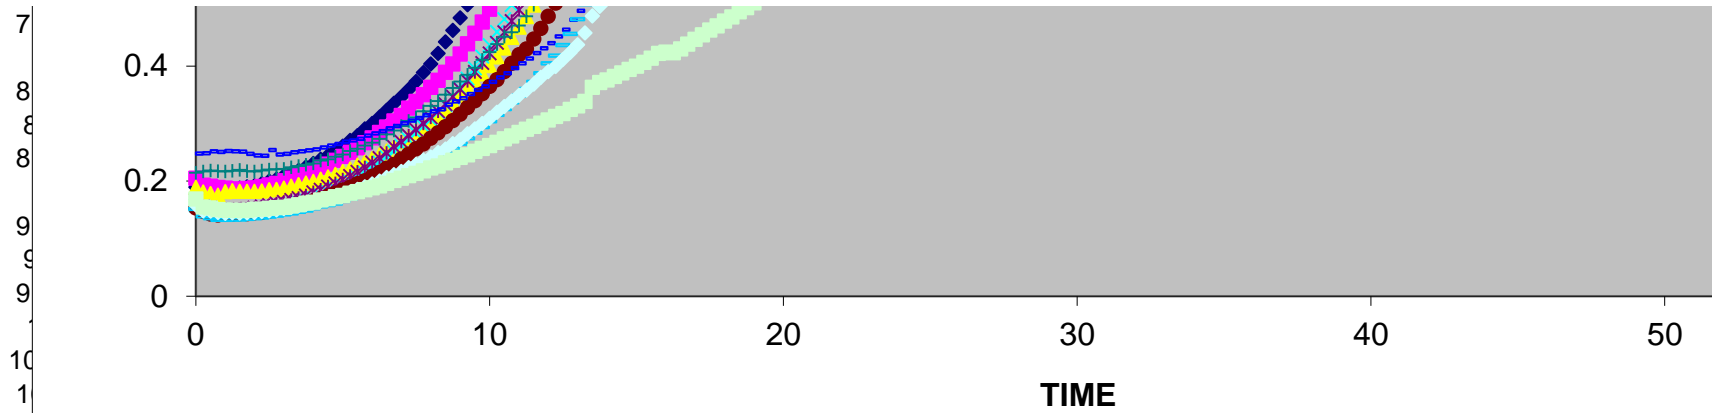

|       |        |        |        |        |        |        |        |
|-------|--------|--------|--------|--------|--------|--------|--------|
| 11    | 0.6992 | 0.5825 | 0.4078 | 0.5508 | 0.4977 | 0.4198 | 0.4704 |
| 11.25 | 0.7307 | 0.6075 | 0.4857 | 0.5576 | 0.5177 | 0.4299 | 0.4865 |
| 11.5  | 0.7614 | 0.6339 | 0.5059 | 0.5827 | 0.5402 | 0.4468 | 0.5065 |
| 11.75 | 0.7927 | 0.6618 | 0.5242 | 0.6115 | 0.5642 | 0.4655 | 0.5261 |
| 12    | 0.8194 | 0.6889 | 0.5464 | 0.6387 | 0.5906 | 0.4863 | 0.5492 |
| 12.25 | 0.8459 | 0.7168 | 0.5622 | 0.6649 | 0.6231 | 0.5091 | 0.5782 |
| 12.5  | 0.8706 | 0.7448 | 0.5743 | 0.6906 | 0.65   | 0.5283 | 0.6052 |
| 12.75 | 0.8904 | 0.7744 | 0.5968 | 0.7174 | 0.6773 | 0.5473 | 0.6315 |
| 13    | 0.9099 | 0.7982 | 0.6186 | 0.7416 | 0.7035 | 0.5693 | 0.6545 |
| 13.25 | 0.9301 | 0.8269 | 0.6426 | 0.7659 | 0.7261 | 0.5893 | 0.6779 |
| 13.5  | 0.9508 | 0.849  | 0.6665 | 0.7908 | 0.7487 | 0.61   | 0.7033 |
| 13.75 | 0.9679 | 0.8707 | 0.6913 | 0.8135 | 0.7723 | 0.6306 | 0.7295 |
| 14    | 0.986  | 0.8918 | 0.7152 | 0.8347 | 0.7944 | 0.6535 | 0.7514 |
| 14.25 | 1.0047 | 0.9106 | 0.7372 | 0.8557 | 0.817  | 0.6726 | 0.7718 |
| 14.5  | 1.0233 | 0.9308 | 0.7608 | 0.8774 | 0.8396 | 0.6932 | 0.7916 |
| 14.75 | 1.0397 | 0.9491 | 0.7825 | 0.8969 | 0.8603 | 0.7155 | 0.8123 |
| 15    | 1.0577 | 0.966  | 0.8057 | 0.9172 | 0.8789 | 0.7365 | 0.8313 |
| 15.25 | 1.0753 | 0.9853 | 0.8251 | 0.9364 | 0.8999 | 0.7571 | 0.8515 |
| 15.5  | 1.0897 | 1.0015 | 0.8439 | 0.9543 | 0.9179 | 0.7771 | 0.8708 |
| 15.75 | 1.1049 | 1.0198 | 0.8628 | 0.971  | 0.9363 | 0.7972 | 0.8896 |
| 16    | 1.1171 | 1.031  | 0.8817 | 0.9856 | 0.9456 | 0.8027 | 0.8885 |
| 16.25 | 1.1316 | 1.0487 | 0.8996 | 0.9998 | 0.9478 | 0.8045 | 0.8868 |
| 16.5  | 1.1443 | 1.0637 | 0.9165 | 1.0146 | 0.9644 | 0.8247 | 0.9065 |
| 16.75 | 1.1579 | 1.0806 | 0.9342 | 1.0281 | 0.9794 | 0.844  | 0.9274 |
| 17    | 1.1715 | 1.0952 | 0.9517 | 1.0413 | 0.9922 | 0.8598 | 0.9442 |
| 17.25 | 1.1858 | 1.1114 | 0.9682 | 1.0534 | 1.0075 | 0.8772 | 0.9634 |
| 17.5  | 1.2004 | 1.1256 | 0.9855 | 1.0636 | 1.0213 | 0.8928 | 0.98   |
| 17.75 | 1.2123 | 1.1388 | 1.0016 | 1.0769 | 1.0341 | 0.9082 | 0.9984 |
| 18    | 1.2261 | 1.1522 | 1.015  | 1.0869 | 1.0471 | 0.9224 | 1.0162 |



|       |        |        |        |        |        |        |        |
|-------|--------|--------|--------|--------|--------|--------|--------|
| 18.25 | 1.239  | 1.1664 | 1.0307 | 1.0992 | 1.0607 | 0.938  | 1.0344 |
| 18.5  | 1.251  | 1.1779 | 1.0478 | 1.1114 | 1.0717 | 0.9522 | 1.0507 |
| 18.75 | 1.2641 | 1.1907 | 1.0607 | 1.1207 | 1.0821 | 0.963  | 1.0677 |
| 19    | 1.2773 | 1.2018 | 1.0765 | 1.1319 | 1.0915 | 0.9771 | 1.0821 |
| 19.25 | 1.2907 | 1.2145 | 1.0891 | 1.1432 | 1.1007 | 0.9898 | 1.0983 |
| 19.5  | 1.3032 | 1.2259 | 1.1041 | 1.1518 | 1.1103 | 1.0004 | 1.1131 |
| 19.75 | 1.3141 | 1.239  | 1.1166 | 1.1627 | 1.1203 | 1.0126 | 1.1285 |
| 20    | 1.3251 | 1.2497 | 1.1283 | 1.1735 | 1.1293 | 1.0236 | 1.1429 |
| 20.25 | 1.3374 | 1.2637 | 1.1419 | 1.1823 | 1.1394 | 1.0323 | 1.1573 |
| 20.5  | 1.3474 | 1.2743 | 1.1521 | 1.1921 | 1.1488 | 1.0469 | 1.1727 |
| 20.75 | 1.3589 | 1.2848 | 1.1637 | 1.2002 | 1.1552 | 1.0538 | 1.1868 |
| 21    | 1.3704 | 1.2956 | 1.1744 | 1.209  | 1.1641 | 1.0664 | 1.1989 |
| 21.25 | 1.3806 | 1.3083 | 1.1829 | 1.2186 | 1.1725 | 1.0741 | 1.2122 |
| 21.5  | 1.39   | 1.3184 | 1.1906 | 1.2265 | 1.1785 | 1.0825 | 1.2248 |
| 21.75 | 1.3999 | 1.3289 | 1.2037 | 1.2361 | 1.187  | 1.0907 | 1.2385 |
| 22    | 1.4093 | 1.3395 | 1.2116 | 1.2446 | 1.1954 | 1.099  | 1.2521 |
| 22.25 | 1.4189 | 1.3493 | 1.2223 | 1.2516 | 1.2024 | 1.1078 | 1.2634 |
| 22.5  | 1.4278 | 1.3589 | 1.2316 | 1.2599 | 1.2121 | 1.1158 | 1.2756 |
| 22.75 | 1.4356 | 1.369  | 1.2391 | 1.2661 | 1.2189 | 1.1268 | 1.2877 |
| 23    | 1.4425 | 1.3781 | 1.2485 | 1.2753 | 1.2272 | 1.1326 | 1.3013 |
| 23.25 | 1.4488 | 1.3861 | 1.257  | 1.284  | 1.2355 | 1.1406 | 1.3121 |
| 23.5  | 1.4527 | 1.3947 | 1.2667 | 1.2909 | 1.2427 | 1.1455 | 1.3246 |
| 23.75 | 1.4559 | 1.4037 | 1.2752 | 1.2948 | 1.2491 | 1.1527 | 1.3348 |
| 24    | 1.4583 | 1.4119 | 1.2845 | 1.3018 | 1.2546 | 1.1616 | 1.3467 |
| 24.25 | 1.4609 | 1.4188 | 1.2937 | 1.3084 | 1.2623 | 1.169  | 1.3577 |
| 24.5  | 1.4615 | 1.4276 | 1.3014 | 1.3138 | 1.2684 | 1.1765 | 1.3679 |
| 24.75 | 1.4635 | 1.4341 | 1.3101 | 1.3204 | 1.2769 | 1.1835 | 1.3783 |
| 25    | 1.466  | 1.4379 | 1.3177 | 1.3263 | 1.2812 | 1.1926 | 1.3871 |
| 25.25 | 1.4669 | 1.4431 | 1.3269 | 1.3324 | 1.2877 | 1.1971 | 1.3943 |
| 25.5  | 1.4687 | 1.4476 | 1.3358 | 1.3379 | 1.2929 | 1.2052 | 1.4037 |
| 25.75 | 1.4687 | 1.4518 | 1.345  | 1.3413 | 1.2947 | 1.2115 | 1.4132 |
| 26    | 1.4682 | 1.453  | 1.3526 | 1.3454 | 1.303  | 1.2185 | 1.422  |
| 26.25 | 1.4704 | 1.4557 | 1.3577 | 1.3494 | 1.3078 | 1.2263 | 1.4298 |
| 26.5  | 1.4702 | 1.4595 | 1.368  | 1.3519 | 1.3138 | 1.2325 | 1.4368 |
| 26.75 | 1.4706 | 1.4619 | 1.3756 | 1.3552 | 1.3174 | 1.24   | 1.4445 |
| 27    | 1.4716 | 1.4639 | 1.3808 | 1.3582 | 1.3213 | 1.2455 | 1.4511 |
| 27.25 | 1.4725 | 1.4677 | 1.3894 | 1.3602 | 1.3255 | 1.2536 | 1.4587 |
| 27.5  | 1.473  | 1.4709 | 1.396  | 1.3613 | 1.3302 | 1.2605 | 1.4643 |
| 27.75 | 1.4747 | 1.4735 | 1.4025 | 1.3632 | 1.3339 | 1.2663 | 1.4685 |
| 28    | 1.4747 | 1.4758 | 1.4095 | 1.3629 | 1.3388 | 1.2723 | 1.4748 |
| 28.25 | 1.4772 | 1.4784 | 1.4156 | 1.3633 | 1.3426 | 1.2776 | 1.4787 |
| 28.5  | 1.4758 | 1.4806 | 1.4201 | 1.3642 | 1.3447 | 1.2851 | 1.482  |

|       |        |        |        |        |        |        |        |
|-------|--------|--------|--------|--------|--------|--------|--------|
| 28.75 | 1.4763 | 1.4813 | 1.4239 | 1.3642 | 1.3465 | 1.2907 | 1.485  |
| 29    | 1.4771 | 1.4829 | 1.4289 | 1.3645 | 1.3488 | 1.2972 | 1.4873 |
| 29.25 | 1.4786 | 1.485  | 1.4341 | 1.3649 | 1.3533 | 1.3025 | 1.4883 |
| 29.5  | 1.4803 | 1.4861 | 1.4367 | 1.364  | 1.3529 | 1.3089 | 1.4881 |
| 29.75 | 1.4807 | 1.4866 | 1.4387 | 1.3634 | 1.3532 | 1.3144 | 1.4881 |
| 30    | 1.4823 | 1.4892 | 1.4412 | 1.3618 | 1.3542 | 1.3199 | 1.4892 |
| 30.25 | 1.4831 | 1.49   | 1.4444 | 1.3613 | 1.3535 | 1.3282 | 1.4901 |
| 30.5  | 1.4829 | 1.4913 | 1.4444 | 1.3622 | 1.3556 | 1.3341 | 1.4894 |
| 30.75 | 1.4823 | 1.4923 | 1.4446 | 1.3617 | 1.3546 | 1.3389 | 1.4871 |
| 31    | 1.4825 | 1.4929 | 1.4466 | 1.3611 | 1.3566 | 1.3437 | 1.4876 |
| 31.25 | 1.4843 | 1.4939 | 1.448  | 1.3601 | 1.3561 | 1.3491 | 1.4862 |
| 31.5  | 1.4842 | 1.496  | 1.4475 | 1.3609 | 1.3556 | 1.3556 | 1.4862 |
| 31.75 | 1.4837 | 1.4956 | 1.4475 | 1.3589 | 1.3557 | 1.3598 | 1.4846 |
| 32    | 1.4837 | 1.4964 | 1.4488 | 1.3587 | 1.3557 | 1.3649 | 1.485  |
| 32.25 | 1.4847 | 1.4969 | 1.4483 | 1.3571 | 1.3554 | 1.3698 | 1.4833 |
| 32.5  | 1.4848 | 1.4964 | 1.448  | 1.3573 | 1.3569 | 1.3723 | 1.4828 |
| 32.75 | 1.4858 | 1.4974 | 1.448  | 1.3578 | 1.3571 | 1.3779 | 1.4827 |
| 33    | 1.4867 | 1.4992 | 1.4467 | 1.3575 | 1.3561 | 1.379  | 1.4838 |
| 33.25 | 1.4876 | 1.498  | 1.4476 | 1.3536 | 1.3566 | 1.3822 | 1.4834 |
| 33.5  | 1.4885 | 1.4993 | 1.4481 | 1.3537 | 1.3569 | 1.3836 | 1.4812 |
| 33.75 | 1.4883 | 1.4994 | 1.4469 | 1.3537 | 1.3567 | 1.3869 | 1.4816 |
| 34    | 1.4888 | 1.4988 | 1.4474 | 1.3541 | 1.3578 | 1.3882 | 1.4815 |
| 34.25 | 1.4892 | 1.4995 | 1.4471 | 1.3537 | 1.3575 | 1.389  | 1.4826 |
| 34.5  | 1.4899 | 1.4996 | 1.4474 | 1.353  | 1.3566 | 1.3913 | 1.4823 |
| 34.75 | 1.4919 | 1.5003 | 1.4472 | 1.3517 | 1.3584 | 1.39   | 1.4823 |
| 35    | 1.492  | 1.5014 | 1.4486 | 1.3528 | 1.3574 | 1.3905 | 1.4829 |
| 35.25 | 1.4922 | 1.502  | 1.4486 | 1.3509 | 1.3589 | 1.3925 | 1.4817 |
| 35.5  | 1.4933 | 1.5004 | 1.4477 | 1.3515 | 1.3581 | 1.392  | 1.4812 |
| 35.75 | 1.4939 | 1.5019 | 1.4479 | 1.3505 | 1.3587 | 1.3938 | 1.4821 |
| 36    | 1.4951 | 1.5018 | 1.4476 | 1.351  | 1.3596 | 1.3939 | 1.4817 |
| 36.25 | 1.4965 | 1.5015 | 1.4469 | 1.3498 | 1.3592 | 1.3951 | 1.4813 |
| 36.5  | 1.4976 | 1.5021 | 1.4473 | 1.3496 | 1.3584 | 1.3955 | 1.4795 |
| 36.75 | 1.4983 | 1.5037 | 1.4481 | 1.3501 | 1.3589 | 1.398  | 1.482  |
| 37    | 1.4992 | 1.5034 | 1.4477 | 1.3486 | 1.3586 | 1.3965 | 1.4799 |
| 37.25 | 1.4997 | 1.504  | 1.449  | 1.3487 | 1.36   | 1.3976 | 1.4796 |
| 37.5  | 1.5011 | 1.5037 | 1.4489 | 1.3479 | 1.3597 | 1.3987 | 1.4805 |
| 37.75 | 1.502  | 1.505  | 1.4486 | 1.3472 | 1.3597 | 1.3992 | 1.4792 |
| 38    | 1.5029 | 1.5047 | 1.4475 | 1.3466 | 1.3605 | 1.3993 | 1.4794 |
| 38.25 | 1.5029 | 1.5046 | 1.449  | 1.3455 | 1.36   | 1.3996 | 1.479  |
| 38.5  | 1.504  | 1.505  | 1.4481 | 1.3455 | 1.3599 | 1.3995 | 1.4792 |
| 38.75 | 1.5035 | 1.5042 | 1.448  | 1.3459 | 1.3594 | 1.4    | 1.4793 |
| 39    | 1.5042 | 1.505  | 1.4488 | 1.3445 | 1.3593 | 1.4005 | 1.4782 |

|       |        |        |        |        |        |        |        |
|-------|--------|--------|--------|--------|--------|--------|--------|
| 39.25 | 1.5058 | 1.5049 | 1.4482 | 1.345  | 1.3599 | 1.4    | 1.4792 |
| 39.5  | 1.507  | 1.5052 | 1.4485 | 1.3455 | 1.3601 | 1.4011 | 1.4787 |
| 39.75 | 1.5073 | 1.506  | 1.4484 | 1.3438 | 1.3602 | 1.4011 | 1.479  |
| 40    | 1.5077 | 1.5062 | 1.4489 | 1.3437 | 1.3608 | 1.4026 | 1.4782 |
| 40.25 | 1.5093 | 1.5063 | 1.4496 | 1.3443 | 1.3613 | 1.404  | 1.4792 |
| 40.5  | 1.5096 | 1.506  | 1.4489 | 1.3443 | 1.3602 | 1.4033 | 1.4786 |
| 40.75 | 1.5108 | 1.5059 | 1.4494 | 1.3435 | 1.3603 | 1.4025 | 1.4777 |
| 41    | 1.5129 | 1.5053 | 1.4485 | 1.3438 | 1.3599 | 1.4042 | 1.4775 |
| 41.25 | 1.5127 | 1.5048 | 1.4491 | 1.342  | 1.3615 | 1.403  | 1.4782 |
| 41.5  | 1.513  | 1.5052 | 1.4495 | 1.3414 | 1.3602 | 1.4042 | 1.4781 |
| 41.75 | 1.513  | 1.5045 | 1.4496 | 1.3416 | 1.3607 | 1.4034 | 1.4787 |
| 42    | 1.5143 | 1.506  | 1.4492 | 1.3415 | 1.3598 | 1.4043 | 1.4768 |
| 42.25 | 1.5164 | 1.506  | 1.4512 | 1.3425 | 1.3615 | 1.4043 | 1.4781 |
| 42.5  | 1.5166 | 1.5062 | 1.4516 | 1.3433 | 1.3602 | 1.4046 | 1.4777 |
| 42.75 | 1.518  | 1.506  | 1.4518 | 1.3413 | 1.3601 | 1.4042 | 1.4777 |
| 43    | 1.5154 | 1.5053 | 1.4522 | 1.3415 | 1.3602 | 1.4049 | 1.4788 |
| 43.25 | 1.5129 | 1.5059 | 1.4522 | 1.3421 | 1.361  | 1.4054 | 1.4785 |
| 43.5  | 1.5111 | 1.5064 | 1.4527 | 1.3413 | 1.3599 | 1.4055 | 1.4786 |
| 43.75 | 1.5114 | 1.5084 | 1.453  | 1.3412 | 1.3606 | 1.4071 | 1.4783 |
| 44    | 1.5125 | 1.5078 | 1.4529 | 1.3427 | 1.3613 | 1.4071 | 1.4802 |
| 44.25 | 1.5102 | 1.5073 | 1.4529 | 1.3413 | 1.3602 | 1.4076 | 1.48   |
| 44.5  | 1.5105 | 1.5065 | 1.4523 | 1.3414 | 1.3605 | 1.4069 | 1.4803 |
| 44.75 | 1.5104 | 1.5065 | 1.454  | 1.3412 | 1.3601 | 1.4067 | 1.4799 |
| 45    | 1.5092 | 1.5064 | 1.4543 | 1.3411 | 1.3598 | 1.4076 | 1.4804 |
| 45.25 | 1.5105 | 1.5057 | 1.4541 | 1.3402 | 1.3595 | 1.4079 | 1.4806 |
| 45.5  | 1.5103 | 1.5065 | 1.4557 | 1.3418 | 1.3597 | 1.408  | 1.4818 |
| 45.75 | 1.51   | 1.5067 | 1.4559 | 1.3412 | 1.3601 | 1.4085 | 1.4818 |
| 46    | 1.5108 | 1.5061 | 1.4561 | 1.341  | 1.3606 | 1.4089 | 1.4821 |
| 46.25 | 1.5109 | 1.5064 | 1.456  | 1.3426 | 1.3594 | 1.4084 | 1.4821 |
| 46.5  | 1.511  | 1.5069 | 1.4571 | 1.3418 | 1.3618 | 1.4091 | 1.4825 |
| 46.75 | 1.511  | 1.5052 | 1.4577 | 1.3409 | 1.3604 | 1.4078 | 1.4813 |
| 47    | 1.5111 | 1.5059 | 1.4574 | 1.3424 | 1.36   | 1.4088 | 1.4824 |
| 47.25 | 1.5102 | 1.5042 | 1.4571 | 1.3408 | 1.3597 | 1.4087 | 1.4818 |
| 47.5  | 1.5112 | 1.5044 | 1.4583 | 1.3417 | 1.3594 | 1.4098 | 1.4829 |
| 47.75 | 1.5109 | 1.5036 | 1.4575 | 1.341  | 1.3588 | 1.408  | 1.4825 |
| 48    | 1.511  | 1.5046 | 1.4582 | 1.3413 | 1.36   | 1.4093 | 1.4831 |
| 48.25 | 1.511  | 1.5042 | 1.4587 | 1.3398 | 1.3596 | 1.4088 | 1.4827 |
| 48.5  | 1.5111 | 1.504  | 1.4592 | 1.3398 | 1.3597 | 1.4081 | 1.4837 |
| 48.75 | 1.5107 | 1.5019 | 1.4578 | 1.3405 | 1.3596 | 1.4071 | 1.4835 |
| 49    | 1.5112 | 1.5026 | 1.4586 | 1.3403 | 1.3601 | 1.4078 | 1.4837 |
| 49.25 | 1.5109 | 1.5034 | 1.4604 | 1.3391 | 1.3593 | 1.4074 | 1.4826 |
| 49.5  | 1.5094 | 1.504  | 1.4603 | 1.3391 | 1.3597 | 1.4083 | 1.4826 |

49.75

1.5105

1.5038

1.4602

1.3401

1.3594

1.4073

1.4831

| D5              | D6           | D7            | D8            |
|-----------------|--------------|---------------|---------------|
| <b>NOVO 250</b> | <b>RAD 3</b> | <b>RAD 10</b> | <b>RAD 30</b> |
| 0.248           | 0.152        | 0.1584        | 0.1689        |
| 0.2485          | 0.1388       | 0.1487        | 0.1553        |
| 0.2519          | 0.1359       | 0.1477        | 0.1535        |
| 0.2505          | 0.1328       | 0.1457        | 0.1506        |
| 0.2525          | 0.133        | 0.1441        | 0.1495        |
| 0.252           | 0.1336       | 0.1452        | 0.1497        |
| 0.2515          | 0.1333       | 0.1447        | 0.1492        |
|                 |              | 0.1451        | 0.1495        |
|                 |              | 0.1458        | 0.1512        |
|                 |              | 0.1473        | 0.1512        |
|                 |              | 0.1487        | 0.1529        |
|                 |              | 0.1502        | 0.1542        |
|                 |              | 0.1525        | 0.1545        |
|                 |              | 0.1543        | 0.1568        |
|                 |              | 0.1573        | 0.159         |
|                 |              | 0.1595        | 0.1616        |
|                 |              | 0.1622        | 0.1636        |
|                 |              | 0.1663        | 0.1672        |
|                 |              | 0.169         | 0.1693        |
|                 |              | 0.1727        | 0.1727        |
|                 |              | 0.1765        | 0.1752        |
|                 |              | 0.1806        | 0.1788        |
|                 |              | 0.1856        | 0.182         |
|                 |              | 0.1902        | 0.1851        |
|                 |              | 0.1952        | 0.1885        |
|                 |              | 0.2003        | 0.192         |
|                 |              | 0.2063        | 0.1965        |
|                 |              | 0.2114        | 0.2011        |
|                 |              | 0.2171        | 0.2049        |
|                 |              | 0.2233        | 0.2094        |
|                 |              | 0.229         | 0.2133        |

- ◆ WT
- WT(GA 3)
- ▲ WT(RAD 3)
- × NO DRUG
- × GA 3uM
- GA 7uM
- + NOVO 100
- NOVO 250
- RAD 3

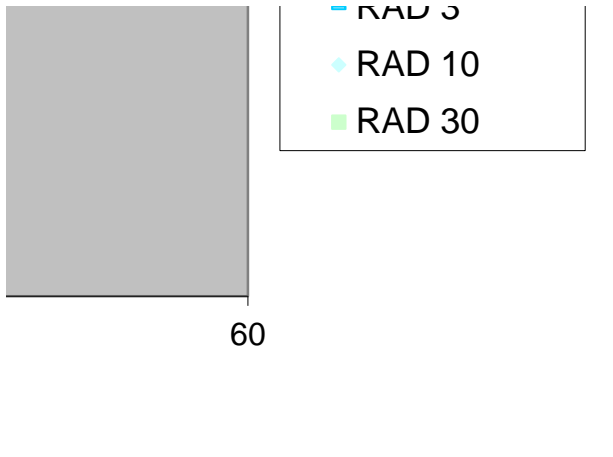

|        |        |        |        |
|--------|--------|--------|--------|
| 0.400  | 0.5404 | 0.2362 | 0.2181 |
| 0.4131 | 0.3601 | 0.2421 | 0.2228 |
| 0.4223 | 0.3724 | 0.2497 | 0.2265 |
| 0.4308 | 0.3875 | 0.256  | 0.2316 |
| 0.4399 | 0.4045 | 0.265  | 0.2362 |
| 0.4513 | 0.4182 | 0.2716 | 0.2413 |
| 0.4634 | 0.4366 | 0.2822 | 0.2458 |
| 0.4802 | 0.4557 | 0.2908 | 0.2517 |
| 0.4958 | 0.4814 | 0.3    | 0.2571 |
| 0.5108 | 0.5074 | 0.3093 | 0.2619 |
| 0.525  | 0.5335 | 0.3199 | 0.2673 |
| 0.5402 | 0.5585 | 0.3296 | 0.2735 |
| 0.5537 | 0.5798 | 0.3393 | 0.2784 |
| 0.565  | 0.6019 | 0.3491 | 0.2848 |
| 0.5768 | 0.6245 | 0.3579 | 0.2901 |
| 0.5909 | 0.6461 | 0.3687 | 0.2953 |
| 0.604  | 0.6702 | 0.3805 | 0.3008 |
| 0.619  | 0.6956 | 0.3903 | 0.3062 |
| 0.6336 | 0.7184 | 0.399  | 0.3122 |
| 0.6458 | 0.7437 | 0.4114 | 0.3177 |
| 0.6441 | 0.7508 | 0.4238 | 0.3245 |
| 0.6397 | 0.7523 | 0.4368 | 0.3307 |
| 0.6513 | 0.773  | 0.4575 | 0.3388 |
| 0.6635 | 0.7955 | 0.4868 | 0.3631 |
| 0.6767 | 0.8165 | 0.5038 | 0.3714 |
| 0.6876 | 0.8345 | 0.5165 | 0.3759 |
| 0.7004 | 0.8514 | 0.5313 | 0.382  |
| 0.7102 | 0.869  | 0.5437 | 0.3882 |
| 0.7209 | 0.8851 | 0.5585 | 0.3943 |
|        |        | 0.5726 | 0.3998 |
|        |        | 0.5892 | 0.4063 |
|        |        | 0.6048 | 0.4134 |
|        |        | 0.6225 | 0.4218 |
|        |        | 0.6305 | 0.4244 |
|        |        | 0.6303 | 0.423  |
|        |        | 0.6446 | 0.4297 |
|        |        | 0.6609 | 0.4383 |
|        |        | 0.6771 | 0.4463 |
|        |        | 0.6919 | 0.4542 |
|        |        | 0.7037 | 0.4623 |
|        |        | 0.7197 | 0.4697 |
|        |        | 0.732  | 0.4779 |

|        |        |        |        |
|--------|--------|--------|--------|
| 0.7307 | 0.9016 | 0.7484 | 0.4854 |
| 0.7426 | 0.9171 | 0.7606 | 0.4944 |
| 0.7523 | 0.9317 | 0.7737 | 0.5015 |
| 0.7644 | 0.9445 | 0.7861 | 0.5097 |
| 0.775  | 0.9589 | 0.8003 | 0.518  |
| 0.7856 | 0.9726 | 0.814  | 0.5258 |
| 0.7971 | 0.9844 | 0.8252 | 0.5343 |
| 0.8071 | 0.9941 | 0.8353 | 0.5421 |
| 0.817  | 1.0078 | 0.8464 | 0.5508 |
| 0.8292 | 1.0194 | 0.857  | 0.5602 |
| 0.8381 | 1.0289 | 0.8673 | 0.5679 |
| 0.85   | 1.0384 | 0.8769 | 0.5766 |
| 0.8609 | 1.0489 | 0.8862 | 0.5844 |
| 0.8716 | 1.0591 | 0.8945 | 0.5925 |
| 0.8834 | 1.0672 | 0.9025 | 0.6015 |
| 0.8933 | 1.0765 | 0.9104 | 0.6081 |
| 0.903  | 1.0851 | 0.9175 | 0.6162 |
| 0.9133 | 1.095  | 0.925  | 0.625  |
| 0.9231 | 1.1022 | 0.9319 | 0.6323 |
| 0.9331 | 1.1107 | 0.9397 | 0.6386 |
| 0.9447 | 1.1196 | 0.9462 | 0.647  |
| 0.955  | 1.1263 | 0.9538 | 0.6537 |
| 0.9664 | 1.1349 | 0.9584 | 0.6615 |
| 0.9765 | 1.1428 | 0.9657 | 0.668  |
| 0.9884 | 1.1505 | 0.9717 | 0.6755 |
| 0.9987 | 1.1577 | 0.9781 | 0.6822 |
| 1.0103 | 1.1612 | 0.984  | 0.6893 |
| 1.0206 | 1.1711 | 0.9899 | 0.6943 |
| 1.0309 | 1.1765 | 0.9975 | 0.7017 |
| 1.0406 | 1.1843 | 1.0031 | 0.7084 |
| 1.0512 | 1.191  | 1.0092 | 0.7158 |
| 1.0616 | 1.1968 | 1.0153 | 0.7223 |
| 1.0731 | 1.2047 | 1.0223 | 0.7265 |
| 1.0833 | 1.2102 | 1.0271 | 0.732  |
| 1.094  | 1.2177 | 1.0315 | 0.7377 |
| 1.1047 | 1.2253 | 1.0381 | 0.7433 |
| 1.1171 | 1.2322 | 1.044  | 0.7501 |
| 1.1256 | 1.2386 | 1.0507 | 0.7547 |
| 1.1355 | 1.2439 | 1.0577 | 0.7605 |
| 1.1466 | 1.2508 | 1.0639 | 0.7665 |
| 1.1554 | 1.2564 | 1.0709 | 0.771  |
| 1.1652 | 1.2634 | 1.0775 | 0.7769 |

|        |        |        |        |
|--------|--------|--------|--------|
| 1.1729 | 1.2689 | 1.0819 | 0.7796 |
| 1.1845 | 1.2749 | 1.0874 | 0.7864 |
| 1.1918 | 1.2821 | 1.0935 | 0.7907 |
| 1.2021 | 1.2869 | 1.1004 | 0.7976 |
| 1.211  | 1.293  | 1.1061 | 0.8004 |
| 1.2217 | 1.2983 | 1.1137 | 0.8061 |
| 1.2312 | 1.3057 | 1.1229 | 0.8122 |
| 1.2396 | 1.3111 | 1.1298 | 0.8147 |
| 1.2483 | 1.317  | 1.1348 | 0.8195 |
| 1.2562 | 1.323  | 1.1421 | 0.8245 |
| 1.2666 | 1.3275 | 1.1484 | 0.8298 |
| 1.2729 | 1.3334 | 1.1558 | 0.8333 |
| 1.2815 | 1.3381 | 1.1613 | 0.8369 |
| 1.2889 | 1.3427 | 1.1673 | 0.8415 |
| 1.2953 | 1.3465 | 1.1739 | 0.8475 |
| 1.304  | 1.3517 | 1.179  | 0.8505 |
| 1.3114 | 1.3555 | 1.1862 | 0.8551 |
| 1.3177 | 1.3592 | 1.1928 | 0.8596 |
| 1.3241 | 1.3611 | 1.1959 | 0.8649 |
| 1.3316 | 1.3671 | 1.2032 | 0.8693 |
| 1.3391 | 1.3706 | 1.2086 | 0.8748 |
| 1.3464 | 1.374  | 1.2158 | 0.8784 |
| 1.3525 | 1.377  | 1.2204 | 0.8832 |
| 1.3586 | 1.3789 | 1.2262 | 0.8892 |
| 1.3642 | 1.3802 | 1.2321 | 0.894  |
| 1.3707 | 1.3809 | 1.2394 | 0.9    |
| 1.3757 | 1.3822 | 1.2465 | 0.9046 |
| 1.3797 | 1.3823 | 1.2525 | 0.9081 |
| 1.3835 | 1.384  | 1.2556 | 0.9114 |
| 1.3881 | 1.3836 | 1.2596 | 0.9184 |
| 1.3913 | 1.3838 | 1.2656 | 0.9239 |
| 1.3938 | 1.3837 | 1.2733 | 0.9272 |
| 1.397  | 1.3858 | 1.2805 | 0.9344 |
| 1.3961 | 1.3837 | 1.2836 | 0.9379 |
| 1.397  | 1.3837 | 1.2888 | 0.9449 |
| 1.3961 | 1.3845 | 1.2943 | 0.9484 |
| 1.3962 | 1.3834 | 1.2994 | 0.9533 |
| 1.3962 | 1.3844 | 1.305  | 0.9581 |
| 1.3944 | 1.3835 | 1.3107 | 0.9624 |
| 1.3932 | 1.3826 | 1.3142 | 0.966  |
| 1.3914 | 1.3827 | 1.3207 | 0.9725 |
| 1.3909 | 1.3824 | 1.3229 | 0.9782 |



|        |        |        |        |
|--------|--------|--------|--------|
| 1.3902 | 1.3822 | 1.3293 | 0.9822 |
| 1.3893 | 1.3821 | 1.3336 | 0.9868 |
| 1.3873 | 1.3818 | 1.337  | 0.9911 |
| 1.3882 | 1.3822 | 1.3417 | 0.9959 |
| 1.3869 | 1.3832 | 1.3481 | 1.0019 |
| 1.3861 | 1.3833 | 1.3517 | 1.006  |
| 1.3851 | 1.3814 | 1.3532 | 1.01   |
| 1.3832 | 1.3827 | 1.356  | 1.0161 |
| 1.3827 | 1.3825 | 1.3617 | 1.0201 |
| 1.3828 | 1.3819 | 1.3635 | 1.0236 |
| 1.3808 | 1.3817 | 1.3671 | 1.0285 |
| 1.3812 | 1.3812 | 1.3701 | 1.0323 |
| 1.3814 | 1.3821 | 1.3735 | 1.0378 |
| 1.3814 | 1.3807 | 1.3723 | 1.0428 |
| 1.3809 | 1.3825 | 1.375  | 1.0469 |
| 1.3818 | 1.3829 | 1.3784 | 1.0514 |
| 1.3821 | 1.3822 | 1.3782 | 1.056  |
| 1.3812 | 1.3823 | 1.3793 | 1.0585 |
| 1.383  | 1.3826 | 1.3809 | 1.0646 |
| 1.3823 | 1.381  | 1.3826 | 1.069  |
| 1.3826 | 1.3828 | 1.3821 | 1.0736 |
| 1.3828 | 1.3827 | 1.3835 | 1.0771 |
| 1.3827 | 1.3814 | 1.385  | 1.0806 |
| 1.3827 | 1.3821 | 1.3841 | 1.086  |
| 1.3824 | 1.3813 | 1.3848 | 1.0895 |
| 1.3835 | 1.3821 | 1.3849 | 1.0946 |
| 1.3835 | 1.3816 | 1.3855 | 1.0982 |
| 1.3844 | 1.3822 | 1.3855 | 1.1034 |
| 1.3839 | 1.3818 | 1.386  | 1.1077 |
| 1.3848 | 1.3812 | 1.3872 | 1.1117 |
| 1.385  | 1.3812 | 1.3861 | 1.1165 |
| 1.3855 | 1.3823 | 1.3859 | 1.1208 |
| 1.3868 | 1.3812 | 1.3882 | 1.1255 |
| 1.3878 | 1.381  | 1.3865 | 1.1289 |
| 1.3868 | 1.3811 | 1.3874 | 1.1342 |
| 1.3883 | 1.3813 | 1.3872 | 1.1374 |
| 1.3882 | 1.3805 | 1.3876 | 1.142  |
| 1.3878 | 1.3816 | 1.3862 | 1.1466 |
| 1.3897 | 1.381  | 1.3855 | 1.1517 |
| 1.3896 | 1.3805 | 1.3871 | 1.1556 |
| 1.3897 | 1.3803 | 1.3855 | 1.1599 |
| 1.39   | 1.3799 | 1.3852 | 1.1639 |

1.3922

1.3809

1.3855

1.1675

|             | <b>N17</b>     |               |                  | <b>N18</b>     |               | <b>N19</b>    | <b>N20</b>      | <b>N21</b>      |
|-------------|----------------|---------------|------------------|----------------|---------------|---------------|-----------------|-----------------|
| <b>TIME</b> | <b>NO DRUG</b> | <b>GA 3uM</b> | <b>WT(RAD 3)</b> | <b>NO DRUG</b> | <b>GA 3uM</b> | <b>GA 7uM</b> | <b>NOVO 100</b> | <b>NOVO 250</b> |
| 0           | 0.1894         | 0.2051        | 0.1892           | 0.1751         | 0.2009        | 0.2041        | 0.2886          | 0.2496          |
| 0.25        | 0.1844         | 0.1929        | 0.1812           | 0.1703         | 0.1857        | 0.1857        | 0.2819          | 0.2463          |
| 0.5         | 0.1833         | 0.1912        | 0.1787           | 0.1685         | 0.1859        | 0.1843        | 0.2754          | 0.2473          |
| 0.75        | 0.1838         | 0.189         | 0.1758           | 0.1685         | 0.184         | 0.1836        | 0.2652          | 0.2497          |
| 1           | 0.1843         | 0.1877        | 0.1818           | 0.1695         | 0.1818        | 0.1797        | 0.2585          | 0.2481          |
| 1.25        | 0.1867         | 0.1862        | 0.1836           | 0.1699         | 0.1823        | 0.1791        | 0.2507          | 0.2481          |
| 1.5         | 0.188          | 0.186         | 0.1823           | 0.1696         | 0.1801        | 0.1785        | 0.2487          | 0.2483          |

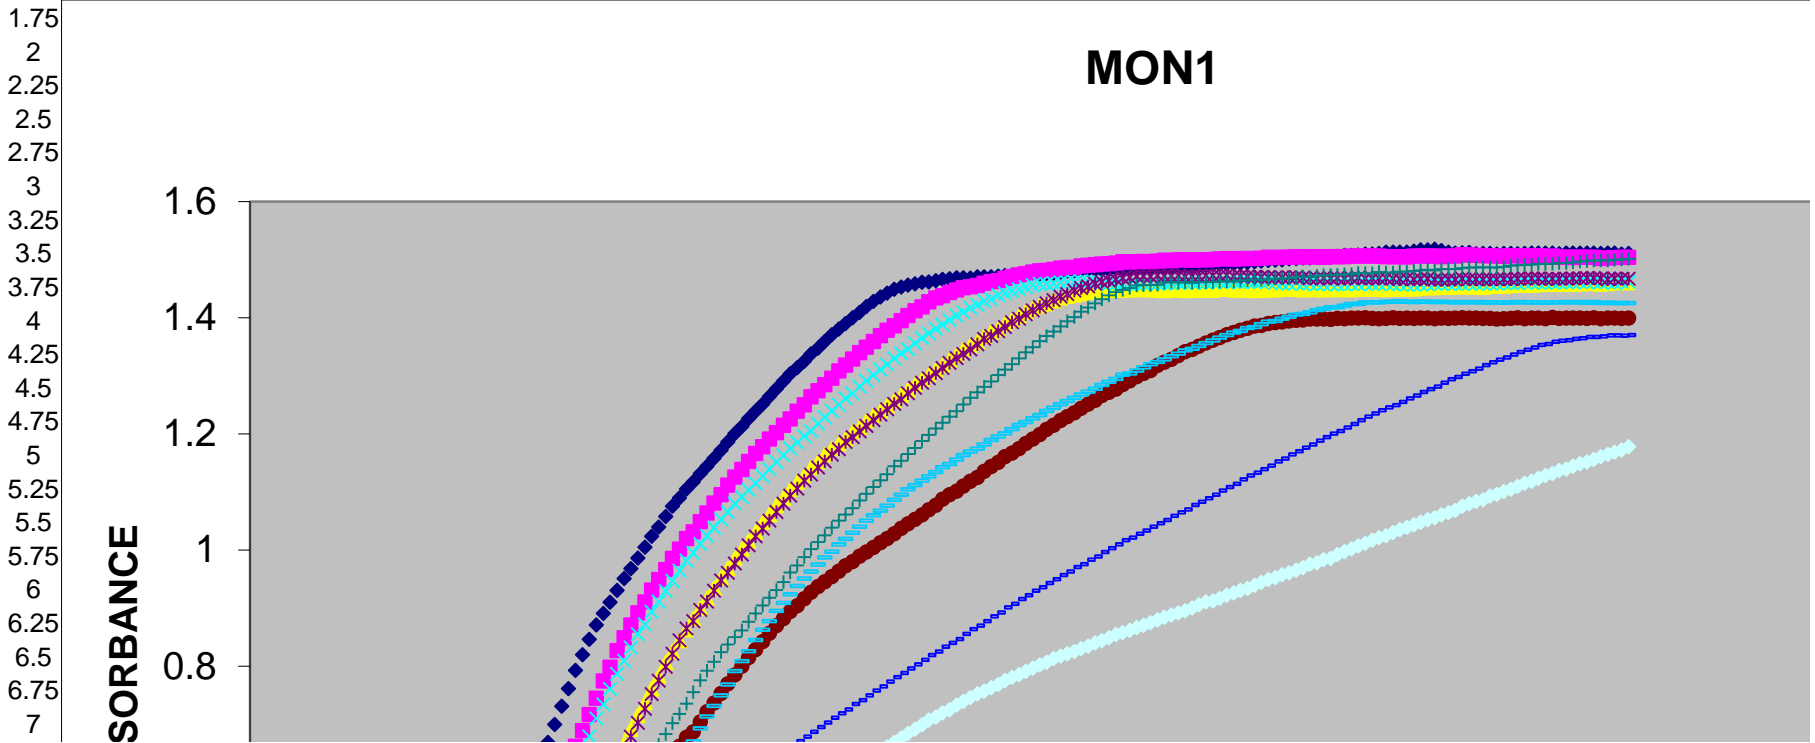

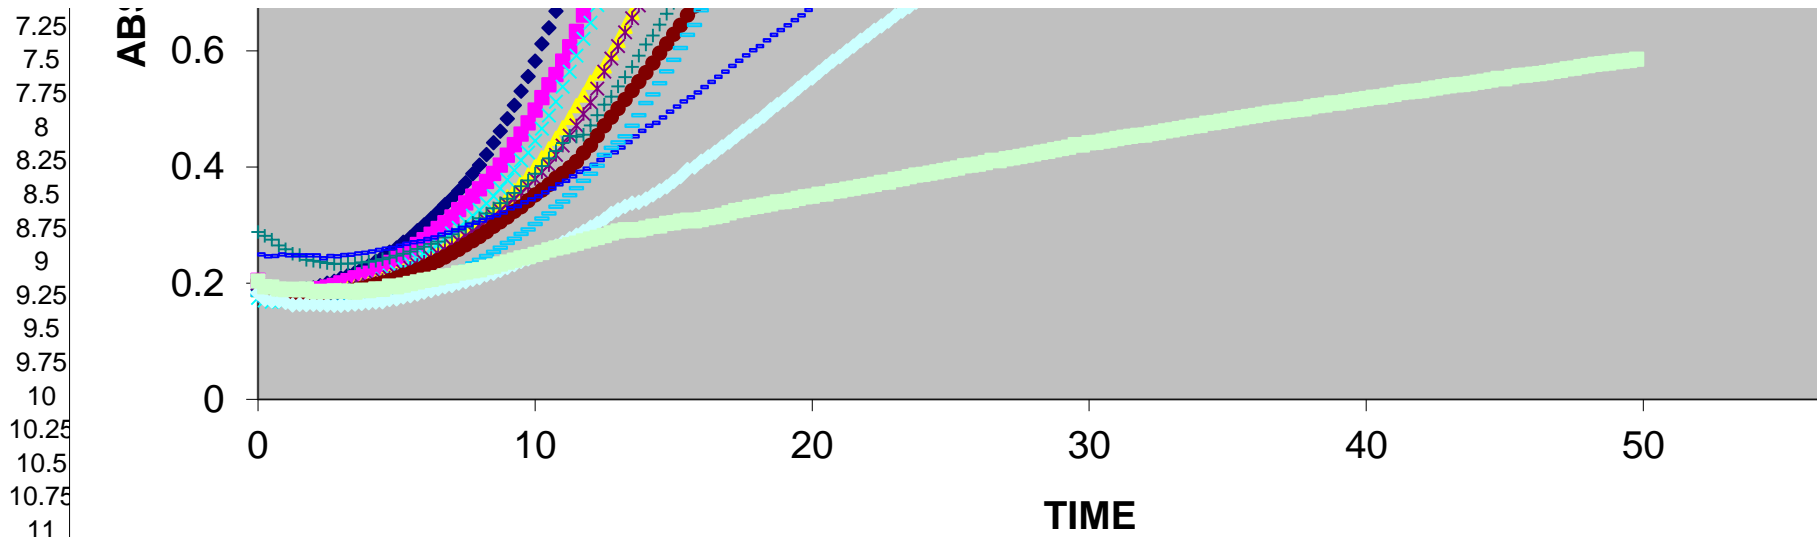

|       |        |        |        |        |        |        |        |        |
|-------|--------|--------|--------|--------|--------|--------|--------|--------|
| 11.5  | 0.7614 | 0.6339 | 0.5059 | 0.5919 | 0.4719 | 0.4095 | 0.4527 | 0.392  |
| 11.75 | 0.7927 | 0.6618 | 0.5242 | 0.621  | 0.4915 | 0.4245 | 0.4561 | 0.3974 |
| 12    | 0.8194 | 0.6889 | 0.5464 | 0.6489 | 0.5118 | 0.4378 | 0.4717 | 0.404  |
| 12.25 | 0.8459 | 0.7168 | 0.5622 | 0.6791 | 0.5351 | 0.4541 | 0.4896 | 0.4125 |
| 12.5  | 0.8706 | 0.7448 | 0.5743 | 0.71   | 0.5645 | 0.4712 | 0.5079 | 0.4199 |
| 12.75 | 0.8904 | 0.7744 | 0.5968 | 0.7344 | 0.5869 | 0.4863 | 0.5217 | 0.4256 |
| 13    | 0.9099 | 0.7982 | 0.6186 | 0.7607 | 0.6086 | 0.5012 | 0.5393 | 0.4338 |
| 13.25 | 0.9301 | 0.8269 | 0.6426 | 0.7865 | 0.6321 | 0.5163 | 0.5553 | 0.4435 |
| 13.5  | 0.9508 | 0.849  | 0.6665 | 0.8093 | 0.6565 | 0.5319 | 0.5728 | 0.4529 |
| 13.75 | 0.9679 | 0.8707 | 0.6913 | 0.8318 | 0.6786 | 0.5473 | 0.5918 | 0.4625 |
| 14    | 0.986  | 0.8918 | 0.7152 | 0.8547 | 0.702  | 0.5629 | 0.6114 | 0.4712 |
| 14.25 | 1.0047 | 0.9106 | 0.7372 | 0.8719 | 0.7267 | 0.5791 | 0.6268 | 0.4763 |
| 14.5  | 1.0233 | 0.9308 | 0.7608 | 0.8933 | 0.7516 | 0.5963 | 0.6455 | 0.4856 |
| 14.75 | 1.0397 | 0.9491 | 0.7825 | 0.9108 | 0.775  | 0.6123 | 0.6643 | 0.4953 |
| 15    | 1.0577 | 0.966  | 0.8057 | 0.9292 | 0.7986 | 0.6289 | 0.6829 | 0.5042 |
| 15.25 | 1.0753 | 0.9853 | 0.8251 | 0.947  | 0.8211 | 0.6443 | 0.7019 | 0.5131 |
| 15.5  | 1.0897 | 1.0015 | 0.8439 | 0.9644 | 0.8445 | 0.6619 | 0.7177 | 0.5201 |
| 15.75 | 1.1049 | 1.0198 | 0.8628 | 0.9817 | 0.8649 | 0.6773 | 0.7354 | 0.5288 |
| 16    | 1.1171 | 1.031  | 0.8817 | 0.9947 | 0.8776 | 0.6868 | 0.7549 | 0.5378 |
| 16.25 | 1.1316 | 1.0487 | 0.8996 | 1.0105 | 0.8968 | 0.7041 | 0.7757 | 0.5466 |
| 16.5  | 1.1443 | 1.0637 | 0.9165 | 1.0242 | 0.9113 | 0.7216 | 0.792  | 0.5556 |
| 16.75 | 1.1579 | 1.0806 | 0.9342 | 1.0384 | 0.9296 | 0.7365 | 0.8075 | 0.5642 |
| 17    | 1.1715 | 1.0952 | 0.9517 | 1.0525 | 0.9472 | 0.753  | 0.824  | 0.5745 |
| 17.25 | 1.1858 | 1.1114 | 0.9682 | 1.0652 | 0.9606 | 0.7697 | 0.8373 | 0.5831 |
| 17.5  | 1.2004 | 1.1256 | 0.9855 | 1.0798 | 0.9766 | 0.7848 | 0.8498 | 0.5927 |

|       |        |        |        |        |        |        |        |        |
|-------|--------|--------|--------|--------|--------|--------|--------|--------|
| 17.75 | 1.2123 | 1.1388 | 1.0016 | 1.091  | 0.9919 | 0.8    | 0.8616 | 0.6016 |
| 18    | 1.2261 | 1.1522 | 1.015  | 1.1032 | 1.0081 | 0.8144 | 0.8761 | 0.6088 |
| 18.25 | 1.239  | 1.1664 | 1.0307 | 1.1142 | 1.0237 | 0.8284 | 0.8905 | 0.6182 |
| 18.5  | 1.251  | 1.1779 | 1.0478 | 1.1269 | 1.0369 | 0.8419 | 0.9045 | 0.6279 |
| 18.75 | 1.2641 | 1.1907 | 1.0607 | 1.1392 | 1.0504 | 0.8563 | 0.9174 | 0.6359 |
| 19    | 1.2773 | 1.2018 | 1.0765 | 1.1514 | 1.0652 | 0.8695 | 0.9308 | 0.6441 |
| 19.25 | 1.2907 | 1.2145 | 1.0891 | 1.1629 | 1.0797 | 0.8819 | 0.9448 | 0.6529 |
| 19.5  | 1.3032 | 1.2259 | 1.1041 | 1.1748 | 1.0933 | 0.8939 | 0.961  | 0.6613 |
| 19.75 | 1.3141 | 1.239  | 1.1166 | 1.1848 | 1.1053 | 0.9039 | 0.9732 | 0.6709 |
| 20    | 1.3251 | 1.2497 | 1.1283 | 1.1959 | 1.1194 | 0.9158 | 0.9874 | 0.6784 |
| 20.25 | 1.3374 | 1.2637 | 1.1419 | 1.2049 | 1.1297 | 0.9272 | 1.0015 | 0.687  |
| 20.5  | 1.3474 | 1.2743 | 1.1521 | 1.2176 | 1.142  | 0.9367 | 1.0135 | 0.695  |
| 20.75 | 1.3589 | 1.2848 | 1.1637 | 1.2283 | 1.1525 | 0.9453 | 1.0249 | 0.703  |
| 21    | 1.3704 | 1.2956 | 1.1744 | 1.2396 | 1.1641 | 0.9542 | 1.0381 | 0.7113 |
| 21.25 | 1.3806 | 1.3083 | 1.1829 | 1.2497 | 1.1731 | 0.9633 | 1.0506 | 0.7186 |
| 21.5  | 1.39   | 1.3184 | 1.1906 | 1.2611 | 1.1859 | 0.9725 | 1.061  | 0.7256 |
| 21.75 | 1.3999 | 1.3289 | 1.2037 | 1.2693 | 1.1943 | 0.9801 | 1.072  | 0.7346 |
| 22    | 1.4093 | 1.3395 | 1.2116 | 1.2813 | 1.2041 | 0.9894 | 1.0853 | 0.7412 |
| 22.25 | 1.4189 | 1.3493 | 1.2223 | 1.2914 | 1.2133 | 0.9962 | 1.0969 | 0.7497 |
| 22.5  | 1.4278 | 1.3589 | 1.2316 | 1.3006 | 1.2236 | 1.0041 | 1.1081 | 0.7578 |
| 22.75 | 1.4356 | 1.369  | 1.2391 | 1.3106 | 1.2327 | 1.0127 | 1.1198 | 0.7652 |
| 23    | 1.4425 | 1.3781 | 1.2485 | 1.3193 | 1.2424 | 1.0196 | 1.1303 | 0.7735 |
| 23.25 | 1.4488 | 1.3861 | 1.257  | 1.3296 | 1.2515 | 1.0278 | 1.1441 | 0.7812 |
| 23.5  | 1.4527 | 1.3947 | 1.2667 | 1.3385 | 1.2593 | 1.0374 | 1.1536 | 0.7883 |
| 23.75 | 1.4559 | 1.4037 | 1.2752 | 1.3459 | 1.2696 | 1.0451 | 1.1651 | 0.7957 |
| 24    | 1.4583 | 1.4119 | 1.2845 | 1.3559 | 1.2789 | 1.0525 | 1.1756 | 0.803  |
| 24.25 | 1.4609 | 1.4188 | 1.2937 | 1.3649 | 1.2882 | 1.0604 | 1.1874 | 0.8105 |
| 24.5  | 1.4615 | 1.4276 | 1.3014 | 1.3727 | 1.2958 | 1.0692 | 1.1982 | 0.8192 |
| 24.75 | 1.4635 | 1.4341 | 1.3101 | 1.3809 | 1.3046 | 1.0767 | 1.2093 | 0.8251 |
| 25    | 1.466  | 1.4379 | 1.3177 | 1.3875 | 1.3135 | 1.0872 | 1.2191 | 0.8331 |
| 25.25 | 1.4669 | 1.4431 | 1.3269 | 1.396  | 1.3222 | 1.0949 | 1.2295 | 0.8397 |
| 25.5  | 1.4687 | 1.4476 | 1.3358 | 1.4035 | 1.3303 | 1.1009 | 1.2389 | 0.8468 |
| 25.75 | 1.4687 | 1.4518 | 1.345  | 1.4091 | 1.3373 | 1.1097 | 1.2503 | 0.8556 |
| 26    | 1.4682 | 1.453  | 1.3526 | 1.4169 | 1.3452 | 1.118  | 1.2618 | 0.8635 |
| 26.25 | 1.4704 | 1.4557 | 1.3577 | 1.422  | 1.354  | 1.1247 | 1.2717 | 0.8699 |
| 26.5  | 1.4702 | 1.4595 | 1.368  | 1.4285 | 1.3633 | 1.1351 | 1.2807 | 0.8772 |
| 26.75 | 1.4706 | 1.4619 | 1.3756 | 1.432  | 1.3684 | 1.1436 | 1.2903 | 0.8858 |
| 27    | 1.4716 | 1.4639 | 1.3808 | 1.4389 | 1.3765 | 1.1507 | 1.3013 | 0.8923 |
| 27.25 | 1.4725 | 1.4677 | 1.3894 | 1.4421 | 1.3836 | 1.1606 | 1.3108 | 0.9009 |
| 27.5  | 1.473  | 1.4709 | 1.396  | 1.4462 | 1.3919 | 1.1669 | 1.3199 | 0.9074 |
| 27.75 | 1.4747 | 1.4735 | 1.4025 | 1.449  | 1.3982 | 1.1743 | 1.33   | 0.9155 |
| 28    | 1.4747 | 1.4758 | 1.4095 | 1.4529 | 1.4061 | 1.1831 | 1.3405 | 0.9218 |

|       |        |        |        |        |        |        |        |        |
|-------|--------|--------|--------|--------|--------|--------|--------|--------|
| 28.25 | 1.4772 | 1.4784 | 1.4156 | 1.4558 | 1.4126 | 1.1912 | 1.349  | 0.9297 |
| 28.5  | 1.4758 | 1.4806 | 1.4201 | 1.4582 | 1.4186 | 1.1987 | 1.3597 | 0.9359 |
| 28.75 | 1.4763 | 1.4813 | 1.4239 | 1.458  | 1.4245 | 1.2076 | 1.3682 | 0.9432 |
| 29    | 1.4771 | 1.4829 | 1.4289 | 1.4591 | 1.4301 | 1.2144 | 1.3762 | 0.9497 |
| 29.25 | 1.4786 | 1.485  | 1.4341 | 1.4607 | 1.4363 | 1.2227 | 1.385  | 0.9567 |
| 29.5  | 1.4803 | 1.4861 | 1.4367 | 1.461  | 1.4404 | 1.2294 | 1.3938 | 0.9628 |
| 29.75 | 1.4807 | 1.4866 | 1.4387 | 1.4614 | 1.4466 | 1.2362 | 1.401  | 0.9704 |
| 30    | 1.4823 | 1.4892 | 1.4412 | 1.4624 | 1.4511 | 1.2438 | 1.4104 | 0.9753 |
| 30.25 | 1.4831 | 1.49   | 1.4444 | 1.4612 | 1.4538 | 1.2511 | 1.4177 | 0.983  |
| 30.5  | 1.4829 | 1.4913 | 1.4444 | 1.461  | 1.4585 | 1.2575 | 1.4245 | 0.9889 |
| 30.75 | 1.4823 | 1.4923 | 1.4446 | 1.4599 | 1.4618 | 1.2657 | 1.4317 | 0.9963 |
| 31    | 1.4825 | 1.4929 | 1.4466 | 1.4582 | 1.464  | 1.2712 | 1.4383 | 1.0029 |
| 31.25 | 1.4843 | 1.4939 | 1.448  | 1.4584 | 1.4662 | 1.2772 | 1.4439 | 1.0097 |
| 31.5  | 1.4842 | 1.496  | 1.4475 | 1.4572 | 1.4684 | 1.2845 | 1.4476 | 1.0168 |
| 31.75 | 1.4837 | 1.4956 | 1.4475 | 1.4569 | 1.4695 | 1.2912 | 1.451  | 1.0215 |
| 32    | 1.4837 | 1.4964 | 1.4488 | 1.4573 | 1.4712 | 1.2987 | 1.4554 | 1.028  |
| 32.25 | 1.4847 | 1.4969 | 1.4483 | 1.4583 | 1.4717 | 1.3038 | 1.4561 | 1.0336 |
| 32.5  | 1.4848 | 1.4964 | 1.448  | 1.4594 | 1.4708 | 1.3091 | 1.4561 | 1.0398 |
| 32.75 | 1.4858 | 1.4974 | 1.448  | 1.4585 | 1.4728 | 1.3176 | 1.4565 | 1.0462 |
| 33    | 1.4867 | 1.4992 | 1.4467 | 1.459  | 1.4722 | 1.3232 | 1.4602 | 1.0518 |
| 33.25 | 1.4876 | 1.498  | 1.4476 | 1.4595 | 1.4719 | 1.3284 | 1.4613 | 1.0588 |
| 33.5  | 1.4885 | 1.4993 | 1.4481 | 1.46   | 1.4726 | 1.3346 | 1.4605 | 1.0646 |
| 33.75 | 1.4883 | 1.4994 | 1.4469 | 1.4604 | 1.471  | 1.3413 | 1.461  | 1.07   |
| 34    | 1.4888 | 1.4988 | 1.4474 | 1.4603 | 1.4713 | 1.3452 | 1.46   | 1.0776 |
| 34.25 | 1.4892 | 1.4995 | 1.4471 | 1.4603 | 1.4715 | 1.3505 | 1.4613 | 1.0832 |
| 34.5  | 1.4899 | 1.4996 | 1.4474 | 1.46   | 1.4728 | 1.3565 | 1.4612 | 1.0889 |
| 34.75 | 1.4919 | 1.5003 | 1.4472 | 1.4615 | 1.4725 | 1.3615 | 1.4615 | 1.0952 |
| 35    | 1.492  | 1.5014 | 1.4486 | 1.4615 | 1.4725 | 1.3659 | 1.4623 | 1.1025 |
| 35.25 | 1.4922 | 1.502  | 1.4486 | 1.4612 | 1.4732 | 1.3704 | 1.4626 | 1.1082 |
| 35.5  | 1.4933 | 1.5004 | 1.4477 | 1.4616 | 1.4716 | 1.3745 | 1.4621 | 1.1141 |
| 35.75 | 1.4939 | 1.5019 | 1.4479 | 1.4615 | 1.4715 | 1.3783 | 1.4638 | 1.1214 |
| 36    | 1.4951 | 1.5018 | 1.4476 | 1.4614 | 1.4709 | 1.3818 | 1.4642 | 1.1279 |
| 36.25 | 1.4965 | 1.5015 | 1.4469 | 1.4614 | 1.4701 | 1.3854 | 1.4652 | 1.133  |
| 36.5  | 1.4976 | 1.5021 | 1.4473 | 1.4615 | 1.4696 | 1.3868 | 1.4648 | 1.139  |
| 36.75 | 1.4983 | 1.5037 | 1.4481 | 1.462  | 1.4698 | 1.39   | 1.4662 | 1.1454 |
| 37    | 1.4992 | 1.5034 | 1.4477 | 1.4598 | 1.4694 | 1.3915 | 1.4668 | 1.1522 |
| 37.25 | 1.4997 | 1.504  | 1.449  | 1.4588 | 1.4695 | 1.3928 | 1.4676 | 1.1575 |
| 37.5  | 1.5011 | 1.5037 | 1.4489 | 1.459  | 1.4695 | 1.3943 | 1.4675 | 1.1643 |
| 37.75 | 1.502  | 1.505  | 1.4486 | 1.4597 | 1.4696 | 1.3952 | 1.4698 | 1.1699 |
| 38    | 1.5029 | 1.5047 | 1.4475 | 1.4582 | 1.4687 | 1.3959 | 1.4709 | 1.1761 |
| 38.25 | 1.5029 | 1.5046 | 1.449  | 1.4588 | 1.4678 | 1.3977 | 1.4699 | 1.1816 |
| 38.5  | 1.504  | 1.505  | 1.4481 | 1.4574 | 1.4676 | 1.3977 | 1.4718 | 1.1883 |

|       |        |        |        |        |        |        |        |        |
|-------|--------|--------|--------|--------|--------|--------|--------|--------|
| 38.75 | 1.5035 | 1.5042 | 1.448  | 1.4579 | 1.4683 | 1.3978 | 1.4729 | 1.1943 |
| 39    | 1.5042 | 1.505  | 1.4488 | 1.4582 | 1.4675 | 1.3973 | 1.4731 | 1.2002 |
| 39.25 | 1.5058 | 1.5049 | 1.4482 | 1.457  | 1.4682 | 1.3987 | 1.4734 | 1.2046 |
| 39.5  | 1.507  | 1.5052 | 1.4485 | 1.457  | 1.4673 | 1.3979 | 1.475  | 1.2106 |
| 39.75 | 1.5073 | 1.506  | 1.4484 | 1.4581 | 1.468  | 1.3993 | 1.4749 | 1.2169 |
| 40    | 1.5077 | 1.5062 | 1.4489 | 1.4579 | 1.4688 | 1.3991 | 1.4768 | 1.2234 |
| 40.25 | 1.5093 | 1.5063 | 1.4496 | 1.459  | 1.4675 | 1.3999 | 1.4765 | 1.2296 |
| 40.5  | 1.5096 | 1.506  | 1.4489 | 1.4584 | 1.4676 | 1.3987 | 1.4762 | 1.2348 |
| 40.75 | 1.5108 | 1.5059 | 1.4494 | 1.4585 | 1.4674 | 1.3981 | 1.4784 | 1.2406 |
| 41    | 1.5129 | 1.5053 | 1.4485 | 1.4591 | 1.468  | 1.3987 | 1.4773 | 1.2455 |
| 41.25 | 1.5127 | 1.5048 | 1.4491 | 1.4577 | 1.4673 | 1.3996 | 1.4773 | 1.2495 |
| 41.5  | 1.513  | 1.5052 | 1.4495 | 1.4575 | 1.4665 | 1.3988 | 1.4789 | 1.255  |
| 41.75 | 1.513  | 1.5045 | 1.4496 | 1.4573 | 1.4668 | 1.3995 | 1.479  | 1.261  |
| 42    | 1.5143 | 1.506  | 1.4492 | 1.4567 | 1.4658 | 1.3987 | 1.4805 | 1.2659 |
| 42.25 | 1.5164 | 1.506  | 1.4512 | 1.4571 | 1.4665 | 1.3993 | 1.4816 | 1.2722 |
| 42.5  | 1.5166 | 1.5062 | 1.4516 | 1.4574 | 1.467  | 1.3992 | 1.4824 | 1.2768 |
| 42.75 | 1.518  | 1.506  | 1.4518 | 1.4588 | 1.4655 | 1.3983 | 1.4816 | 1.2814 |
| 43    | 1.5154 | 1.5053 | 1.4522 | 1.4584 | 1.4652 | 1.3993 | 1.4833 | 1.2879 |
| 43.25 | 1.5129 | 1.5059 | 1.4522 | 1.4589 | 1.466  | 1.3988 | 1.4834 | 1.2941 |
| 43.5  | 1.5111 | 1.5064 | 1.4527 | 1.4589 | 1.4655 | 1.3991 | 1.4838 | 1.2979 |
| 43.75 | 1.5114 | 1.5084 | 1.453  | 1.4585 | 1.4671 | 1.3996 | 1.4853 | 1.3035 |
| 44    | 1.5125 | 1.5078 | 1.4529 | 1.4589 | 1.4664 | 1.3993 | 1.4862 | 1.3078 |
| 44.25 | 1.5102 | 1.5073 | 1.4529 | 1.4586 | 1.466  | 1.399  | 1.4865 | 1.3122 |
| 44.5  | 1.5105 | 1.5065 | 1.4523 | 1.459  | 1.4659 | 1.3988 | 1.4868 | 1.3181 |
| 44.75 | 1.5104 | 1.5065 | 1.454  | 1.459  | 1.466  | 1.3988 | 1.4866 | 1.3232 |
| 45    | 1.5092 | 1.5064 | 1.4543 | 1.4589 | 1.4657 | 1.3976 | 1.4863 | 1.3277 |
| 45.25 | 1.5105 | 1.5057 | 1.4541 | 1.46   | 1.4663 | 1.3983 | 1.4876 | 1.3313 |
| 45.5  | 1.5103 | 1.5065 | 1.4557 | 1.4595 | 1.4662 | 1.3988 | 1.4896 | 1.3367 |
| 45.75 | 1.51   | 1.5067 | 1.4559 | 1.4593 | 1.4673 | 1.3999 | 1.4903 | 1.3406 |
| 46    | 1.5108 | 1.5061 | 1.4561 | 1.4607 | 1.4668 | 1.398  | 1.4906 | 1.3445 |
| 46.25 | 1.5109 | 1.5064 | 1.456  | 1.4607 | 1.4676 | 1.3992 | 1.4913 | 1.3488 |
| 46.5  | 1.511  | 1.5069 | 1.4571 | 1.4605 | 1.4675 | 1.3993 | 1.4925 | 1.3529 |
| 46.75 | 1.511  | 1.5052 | 1.4577 | 1.4601 | 1.4664 | 1.3983 | 1.4926 | 1.3549 |
| 47    | 1.5111 | 1.5059 | 1.4574 | 1.4605 | 1.4668 | 1.4001 | 1.4929 | 1.3586 |
| 47.25 | 1.5102 | 1.5042 | 1.4571 | 1.461  | 1.4673 | 1.3988 | 1.494  | 1.3599 |
| 47.5  | 1.5112 | 1.5044 | 1.4583 | 1.461  | 1.467  | 1.399  | 1.4941 | 1.3614 |
| 47.75 | 1.5109 | 1.5036 | 1.4575 | 1.4609 | 1.4675 | 1.3992 | 1.4951 | 1.3635 |
| 48    | 1.511  | 1.5046 | 1.4582 | 1.4613 | 1.4678 | 1.3991 | 1.4966 | 1.3648 |
| 48.25 | 1.511  | 1.5042 | 1.4587 | 1.4609 | 1.4682 | 1.3988 | 1.4972 | 1.3667 |
| 48.5  | 1.5111 | 1.504  | 1.4592 | 1.4617 | 1.4681 | 1.3998 | 1.4984 | 1.3669 |
| 48.75 | 1.5107 | 1.5019 | 1.4578 | 1.4611 | 1.4674 | 1.3984 | 1.4983 | 1.3678 |
| 49    | 1.5112 | 1.5026 | 1.4586 | 1.4608 | 1.4662 | 1.3992 | 1.4987 | 1.3694 |

|       |        |        |        |        |        |        |        |        |
|-------|--------|--------|--------|--------|--------|--------|--------|--------|
| 49.25 | 1.5109 | 1.5034 | 1.4604 | 1.46   | 1.4678 | 1.3992 | 1.4997 | 1.3693 |
| 49.5  | 1.5094 | 1.504  | 1.4603 | 1.4616 | 1.4668 | 1.3986 | 1.5002 | 1.3692 |
| 49.75 | 1.5105 | 1.5038 | 1.4602 | 1.4618 | 1.4672 | 1.3991 | 1.501  | 1.3699 |



**N22**

**N23**

**N24**

**RAD 3**

**RAD 10**

**RAD 30**

0.18  
0.1702  
0.1691  
0.1682  
0.1678  
0.1666  
0.1663

0.1832  
0.1726  
0.1701  
0.1699  
0.167  
0.163  
0.1636

0.2039  
0.1944  
0.1938  
0.1904  
0.1894  
0.1896  
0.1888  
0.1903  
0.1858  
0.1857  
0.1857  
0.1869  
0.1863  
0.1867  
0.1846  
0.188  
0.1874  
0.1903  
0.1899  
0.195  
0.1942  
0.197  
0.1995  
0.2022  
0.2052  
0.207  
0.2096  
0.2124  
0.2137

- ◆ NO DRUG
- GA 3uM
- ▲ WT(RAD 3)
- × NO DRUG
- \* GA 3uM
- GA 7uM
- + NOVO 100

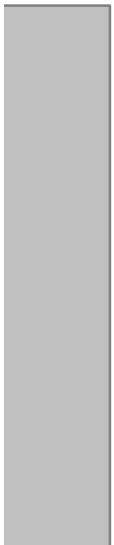

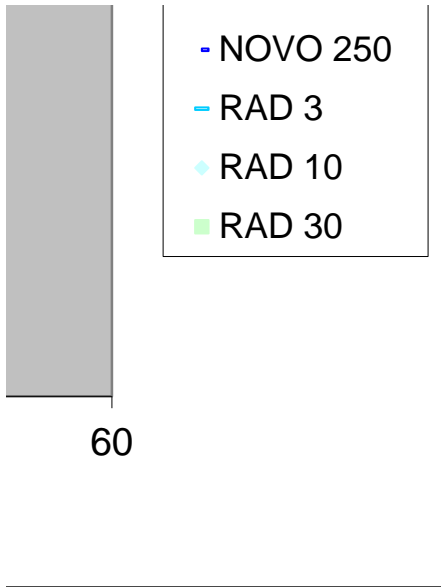

0.2178  
 0.2194  
 0.2219  
 0.2236  
 0.2274  
 0.2295  
 0.2335  
 0.2364  
 0.2398  
 0.2437  
 0.2462  
 0.2499  
 0.2532  
 0.2577  
 0.2606  
 0.2633  
 0.2665  
 0.269  
 0.2732  
 0.2764  
 0.2792  
 0.2822  
 0.2865  
 0.2899  
 0.2923  
 0.2918  
 0.2923  
 0.295  
 0.2981  
 0.2991  
 0.3032  
 0.3043  
 0.3073  
 0.3088  
 0.3078  
 0.3098  
 0.313  
 0.315  
 0.317  
 0.3213  
 0.3252  
 0.3272

|        |        |
|--------|--------|
| 0.3639 | 0.2831 |
| 0.3763 | 0.2896 |
| 0.3888 | 0.2966 |
| 0.4027 | 0.3031 |
| 0.4214 | 0.3106 |
| 0.4334 | 0.3201 |
| 0.4428 | 0.3264 |
| 0.4532 | 0.3322 |
| 0.4712 | 0.3379 |
| 0.4897 | 0.3394 |
| 0.5107 | 0.3452 |
| 0.5253 | 0.3523 |
| 0.5444 | 0.3596 |
| 0.5651 | 0.3662 |
| 0.5851 | 0.3754 |
| 0.6051 | 0.3838 |
| 0.6277 | 0.3959 |
| 0.6449 | 0.4004 |
| 0.6701 | 0.4099 |
| 0.6928 | 0.4181 |
| 0.7132 | 0.4257 |
| 0.7314 | 0.435  |
| 0.7495 | 0.4432 |
| 0.7686 | 0.4528 |
| 0.7914 | 0.4618 |

|        |        |        |
|--------|--------|--------|
| 0.8086 | 0.471  | 0.3307 |
| 0.8256 | 0.4789 | 0.3323 |
| 0.8452 | 0.4879 | 0.3346 |
| 0.8623 | 0.4989 | 0.3367 |
| 0.8774 | 0.5077 | 0.3401 |
| 0.895  | 0.5157 | 0.341  |
| 0.9088 | 0.5261 | 0.3432 |
| 0.9238 | 0.5359 | 0.3465 |
| 0.9383 | 0.5456 | 0.349  |
| 0.9507 | 0.5536 | 0.3502 |
| 0.9631 | 0.5633 | 0.3533 |
| 0.9752 | 0.573  | 0.3542 |
| 0.9872 | 0.5827 | 0.3583 |
| 0.9972 | 0.5901 | 0.3597 |
| 1.0098 | 0.6003 | 0.3625 |
| 1.0188 | 0.6084 | 0.3638 |
| 1.0297 | 0.6182 | 0.3664 |
| 1.04   | 0.6262 | 0.3685 |
| 1.0505 | 0.6353 | 0.3707 |
| 1.0599 | 0.6435 | 0.3737 |
| 1.0677 | 0.6515 | 0.3745 |
| 1.0761 | 0.6609 | 0.3786 |
| 1.0864 | 0.6684 | 0.3802 |
| 1.0949 | 0.6762 | 0.3835 |
| 1.1042 | 0.6842 | 0.3862 |
| 1.1115 | 0.6912 | 0.3878 |
| 1.1195 | 0.6988 | 0.39   |
| 1.1266 | 0.707  | 0.3921 |
| 1.1344 | 0.7123 | 0.394  |
| 1.1425 | 0.7193 | 0.3964 |
| 1.148  | 0.7248 | 0.3984 |
| 1.1557 | 0.7328 | 0.4022 |
| 1.1633 | 0.7389 | 0.4033 |
| 1.1694 | 0.7458 | 0.4052 |
| 1.1745 | 0.7521 | 0.4077 |
| 1.1815 | 0.7568 | 0.4116 |
| 1.1892 | 0.7628 | 0.4115 |
| 1.1952 | 0.7684 | 0.4147 |
| 1.2007 | 0.7752 | 0.4161 |
| 1.208  | 0.7804 | 0.4186 |
| 1.2152 | 0.7853 | 0.4204 |
| 1.2203 | 0.7911 | 0.4228 |

|        |        |        |
|--------|--------|--------|
| 1.2268 | 0.7964 | 0.4256 |
| 1.2322 | 0.8019 | 0.4274 |
| 1.2395 | 0.8064 | 0.4299 |
| 1.2451 | 0.8128 | 0.4324 |
| 1.2512 | 0.8172 | 0.4345 |
| 1.2563 | 0.8214 | 0.4386 |
| 1.2623 | 0.8249 | 0.438  |
| 1.2674 | 0.8303 | 0.442  |
| 1.2726 | 0.8346 | 0.4426 |
| 1.2774 | 0.8398 | 0.445  |
| 1.2841 | 0.844  | 0.4467 |
| 1.2897 | 0.8487 | 0.4492 |
| 1.2946 | 0.8543 | 0.4517 |
| 1.3018 | 0.8578 | 0.4533 |
| 1.3041 | 0.8615 | 0.4548 |
| 1.3091 | 0.8665 | 0.4553 |
| 1.3143 | 0.8704 | 0.4581 |
| 1.3201 | 0.8745 | 0.4595 |
| 1.324  | 0.8795 | 0.4626 |
| 1.328  | 0.8841 | 0.4639 |
| 1.3337 | 0.8879 | 0.4664 |
| 1.338  | 0.8918 | 0.4685 |
| 1.3435 | 0.8953 | 0.4709 |
| 1.3461 | 0.9    | 0.4718 |
| 1.3512 | 0.9053 | 0.4759 |
| 1.3562 | 0.9103 | 0.4766 |
| 1.3605 | 0.9122 | 0.479  |
| 1.3657 | 0.9165 | 0.4808 |
| 1.3701 | 0.9221 | 0.4834 |
| 1.3744 | 0.9262 | 0.4853 |
| 1.3773 | 0.9306 | 0.4871 |
| 1.3821 | 0.9336 | 0.4887 |
| 1.3837 | 0.9391 | 0.4909 |
| 1.3887 | 0.9439 | 0.4933 |
| 1.3931 | 0.9489 | 0.4948 |
| 1.3944 | 0.9524 | 0.4962 |
| 1.398  | 0.9575 | 0.4982 |
| 1.4017 | 0.9607 | 0.4996 |
| 1.4054 | 0.9653 | 0.5005 |
| 1.4066 | 0.9697 | 0.5038 |
| 1.4092 | 0.9753 | 0.5058 |
| 1.4132 | 0.978  | 0.5072 |

|        |        |        |
|--------|--------|--------|
| 1.4152 | 0.9832 | 0.5105 |
| 1.418  | 0.9857 | 0.5105 |
| 1.418  | 0.9918 | 0.5126 |
| 1.4206 | 0.997  | 0.5151 |
| 1.4233 | 1.0017 | 0.5163 |
| 1.4236 | 1.0068 | 0.5183 |
| 1.4262 | 1.0112 | 0.5201 |
| 1.4264 | 1.0166 | 0.5211 |
| 1.4262 | 1.0212 | 0.5239 |
| 1.4273 | 1.0246 | 0.5252 |
| 1.4274 | 1.0298 | 0.5287 |
| 1.4286 | 1.0353 | 0.5297 |
| 1.4272 | 1.0391 | 0.5306 |
| 1.4267 | 1.0434 | 0.532  |
| 1.4279 | 1.0479 | 0.5347 |
| 1.4272 | 1.0523 | 0.5361 |
| 1.4267 | 1.0555 | 0.5387 |
| 1.4271 | 1.0605 | 0.5403 |
| 1.4267 | 1.0642 | 0.5417 |
| 1.4263 | 1.0683 | 0.5423 |
| 1.4269 | 1.0751 | 0.5438 |
| 1.4262 | 1.0799 | 0.5462 |
| 1.4269 | 1.0834 | 0.5481 |
| 1.4261 | 1.0862 | 0.5502 |
| 1.4263 | 1.0928 | 0.5527 |
| 1.426  | 1.0959 | 0.5526 |
| 1.4256 | 1.1005 | 0.5555 |
| 1.4263 | 1.1045 | 0.5577 |
| 1.4268 | 1.1095 | 0.5583 |
| 1.4261 | 1.1149 | 0.5599 |
| 1.4265 | 1.1181 | 0.5613 |
| 1.4262 | 1.123  | 0.5628 |
| 1.4256 | 1.1282 | 0.5652 |
| 1.4265 | 1.1316 | 0.5668 |
| 1.426  | 1.1368 | 0.5695 |
| 1.4266 | 1.1392 | 0.5705 |
| 1.426  | 1.1442 | 0.5735 |
| 1.4269 | 1.1485 | 0.5747 |
| 1.4259 | 1.1515 | 0.5769 |
| 1.4268 | 1.1556 | 0.578  |
| 1.425  | 1.1605 | 0.5791 |
| 1.4256 | 1.1643 | 0.5817 |

|        |        |        |
|--------|--------|--------|
| 1.4249 | 1.1682 | 0.5824 |
| 1.4252 | 1.1722 | 0.5837 |
| 1.4252 | 1.1779 | 0.5862 |

|             | <b>G17</b> |                 | <b>G18</b>       |                | <b>G19</b>    |               | <b>G20</b>      |  |
|-------------|------------|-----------------|------------------|----------------|---------------|---------------|-----------------|--|
| <b>TIME</b> | <b>WT</b>  | <b>WT(GA 3)</b> | <b>WT(RAD 3)</b> | <b>NO DRUG</b> | <b>GA 3uM</b> | <b>GA 7uM</b> | <b>NOVO 100</b> |  |
| 0           | 0.1894     | 0.2051          | 0.1892           | 0.1852         | 0.1888        | 0.2567        | 0.2016          |  |
| 0.25        | 0.1844     | 0.1929          | 0.1812           | 0.1815         | 0.177         | 0.2502        | 0.2071          |  |
| 0.5         | 0.1833     | 0.1912          | 0.1787           | 0.179          | 0.1748        | 0.2482        | 0.208           |  |
| 0.75        | 0.1838     | 0.189           | 0.1758           | 0.1764         | 0.1736        | 0.2468        | 0.2086          |  |
| 1           | 0.1843     | 0.1877          | 0.1818           | 0.1757         | 0.1727        | 0.2459        | 0.2085          |  |

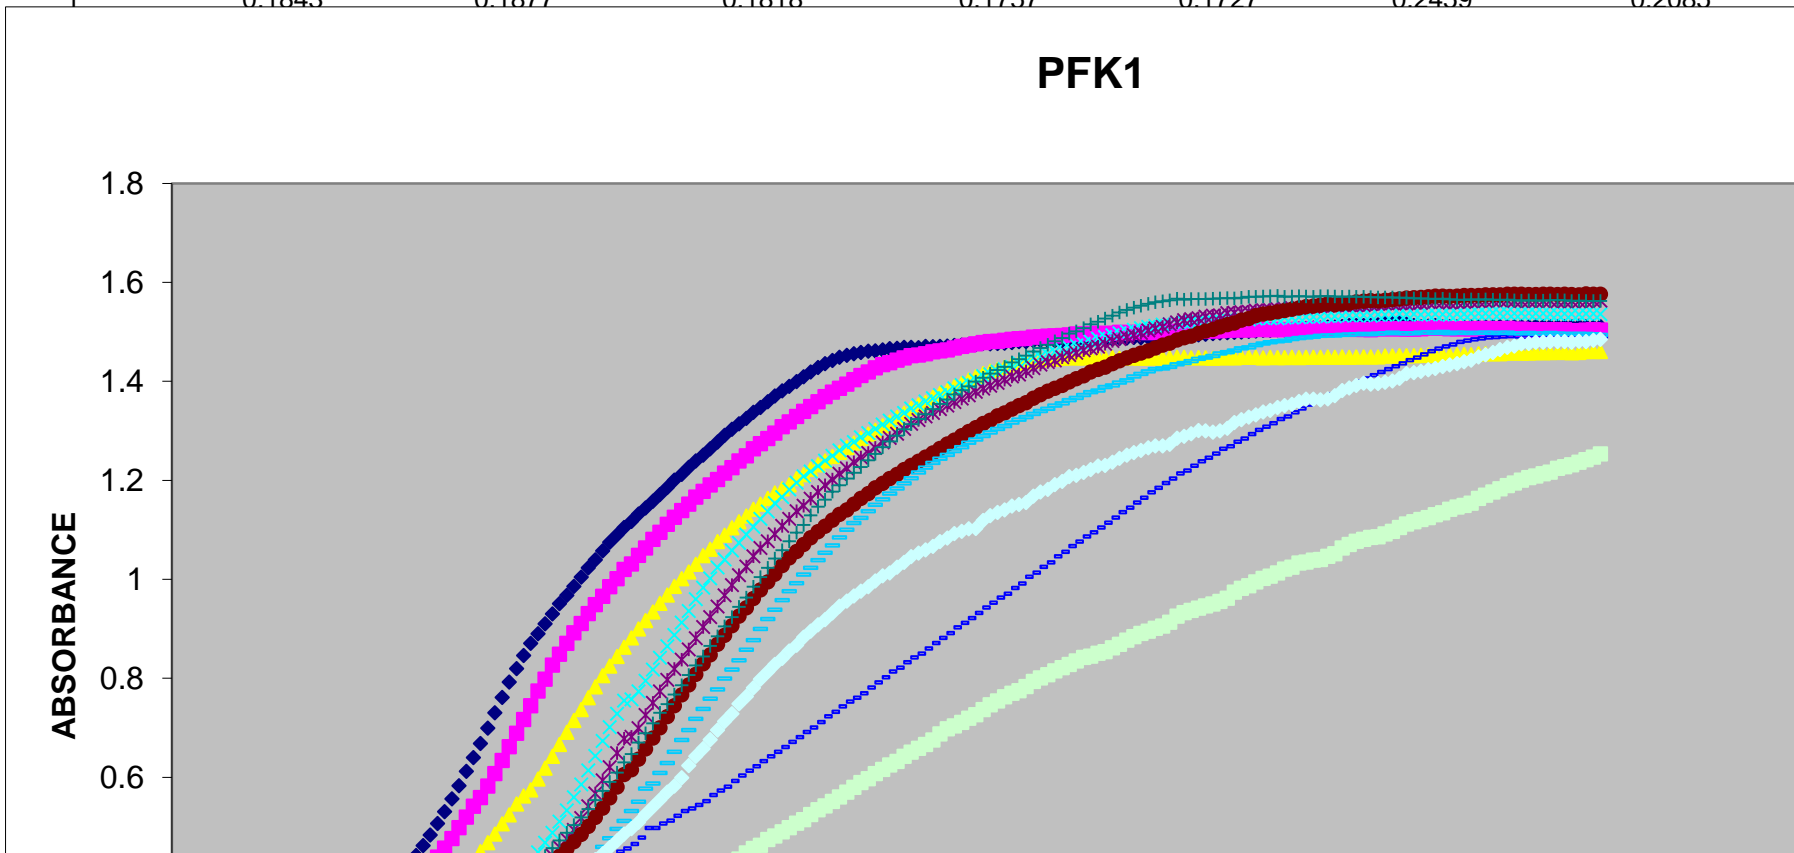

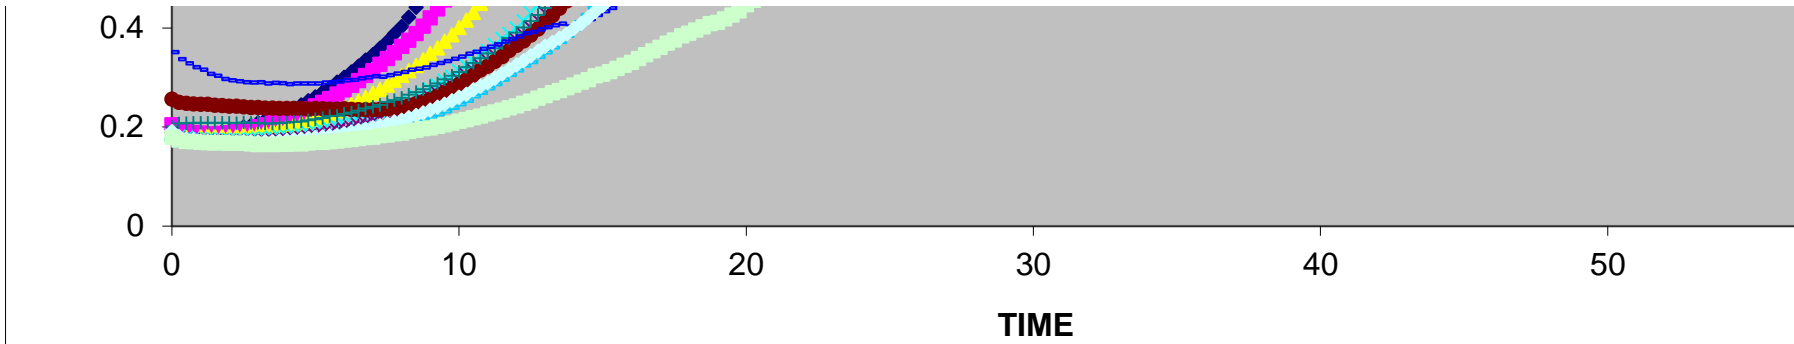

|       |        |        |        |        |        |        |        |
|-------|--------|--------|--------|--------|--------|--------|--------|
| 10.25 | 0.6122 | 0.5197 | 0.416  | 0.3238 | 0.3058 | 0.2994 | 0.3212 |
| 10.5  | 0.6397 | 0.5418 | 0.4316 | 0.3331 | 0.3148 | 0.305  | 0.3296 |
| 10.75 | 0.6685 | 0.5593 | 0.4497 | 0.3439 | 0.3246 | 0.3154 | 0.3395 |
| 11    | 0.6992 | 0.5825 | 0.4678 | 0.3542 | 0.3348 | 0.3232 | 0.3491 |
| 11.25 | 0.7307 | 0.6075 | 0.4857 | 0.366  | 0.3456 | 0.3328 | 0.3591 |
| 11.5  | 0.7614 | 0.6339 | 0.5059 | 0.3787 | 0.3569 | 0.3427 | 0.3699 |
| 11.75 | 0.7927 | 0.6618 | 0.5242 | 0.3881 | 0.3668 | 0.3546 | 0.3799 |
| 12    | 0.8194 | 0.6889 | 0.5464 | 0.3991 | 0.3761 | 0.3649 | 0.3909 |
| 12.25 | 0.8459 | 0.7168 | 0.5622 | 0.4145 | 0.3869 | 0.3742 | 0.4014 |
| 12.5  | 0.8706 | 0.7448 | 0.5743 | 0.4308 | 0.4011 | 0.3856 | 0.4146 |
| 12.75 | 0.8904 | 0.7744 | 0.5968 | 0.4488 | 0.4159 | 0.3979 | 0.4267 |
| 13    | 0.9099 | 0.7982 | 0.6186 | 0.4681 | 0.4314 | 0.4121 | 0.4409 |
| 13.25 | 0.9301 | 0.8269 | 0.6426 | 0.4878 | 0.4418 | 0.4253 | 0.4568 |
| 13.5  | 0.9508 | 0.849  | 0.6665 | 0.5103 | 0.4586 | 0.4402 | 0.4723 |
| 13.75 | 0.9679 | 0.8707 | 0.6913 | 0.5331 | 0.475  | 0.4548 | 0.4879 |
| 14    | 0.986  | 0.8918 | 0.7152 | 0.5595 | 0.4941 | 0.4699 | 0.5035 |
| 14.25 | 1.0047 | 0.9106 | 0.7372 | 0.5859 | 0.5175 | 0.4847 | 0.5187 |
| 14.5  | 1.0233 | 0.9308 | 0.7608 | 0.614  | 0.5418 | 0.501  | 0.5359 |
| 14.75 | 1.0397 | 0.9491 | 0.7825 | 0.6432 | 0.5672 | 0.5189 | 0.5537 |
| 15    | 1.0577 | 0.966  | 0.8057 | 0.6733 | 0.5943 | 0.5375 | 0.5726 |
| 15.25 | 1.0753 | 0.9853 | 0.8251 | 0.7015 | 0.6208 | 0.5582 | 0.5909 |
| 15.5  | 1.0897 | 1.0015 | 0.8439 | 0.7282 | 0.6488 | 0.5807 | 0.6096 |
| 15.75 | 1.1049 | 1.0198 | 0.8628 | 0.7552 | 0.678  | 0.6056 | 0.6299 |
| 16    | 1.1171 | 1.031  | 0.8817 | 0.7574 | 0.6819 | 0.6156 | 0.6471 |
| 16.25 | 1.1316 | 1.0487 | 0.8996 | 0.774  | 0.6995 | 0.6364 | 0.6706 |
| 16.5  | 1.1443 | 1.0637 | 0.9165 | 0.7954 | 0.7259 | 0.6574 | 0.6893 |
| 16.75 | 1.1579 | 1.0806 | 0.9342 | 0.8176 | 0.7506 | 0.6793 | 0.7094 |
| 17    | 1.1715 | 1.0952 | 0.9517 | 0.8414 | 0.7739 | 0.7002 | 0.7304 |
| 17.25 | 1.1858 | 1.1114 | 0.9682 | 0.8649 | 0.7971 | 0.7227 | 0.7479 |
| 17.5  | 1.2004 | 1.1256 | 0.9855 | 0.8877 | 0.8187 | 0.7448 | 0.7673 |
| 17.75 | 1.2123 | 1.1388 | 1.0016 | 0.9128 | 0.838  | 0.7667 | 0.7858 |



|       |        |        |        |        |        |        |        |
|-------|--------|--------|--------|--------|--------|--------|--------|
| 18    | 1.2261 | 1.1522 | 1.015  | 0.9363 | 0.8584 | 0.7867 | 0.807  |
| 18.25 | 1.239  | 1.1664 | 1.0307 | 0.9602 | 0.8813 | 0.8081 | 0.8263 |
| 18.5  | 1.251  | 1.1779 | 1.0478 | 0.9829 | 0.9034 | 0.8291 | 0.8443 |
| 18.75 | 1.2641 | 1.1907 | 1.0607 | 1.002  | 0.9239 | 0.8475 | 0.8653 |
| 19    | 1.2773 | 1.2018 | 1.0765 | 1.0237 | 0.9451 | 0.8685 | 0.885  |
| 19.25 | 1.2907 | 1.2145 | 1.0891 | 1.0403 | 0.9674 | 0.887  | 0.905  |
| 19.5  | 1.3032 | 1.2259 | 1.1041 | 1.0579 | 0.9883 | 0.9064 | 0.9238 |
| 19.75 | 1.3141 | 1.239  | 1.1166 | 1.0737 | 1.0087 | 0.9257 | 0.9442 |
| 20    | 1.3251 | 1.2497 | 1.1283 | 1.0904 | 1.0261 | 0.9427 | 0.9633 |
| 20.25 | 1.3374 | 1.2637 | 1.1419 | 1.1061 | 1.0464 | 0.9613 | 0.9854 |
| 20.5  | 1.3474 | 1.2743 | 1.1521 | 1.1223 | 1.0632 | 0.9784 | 1.0045 |
| 20.75 | 1.3589 | 1.2848 | 1.1637 | 1.1373 | 1.077  | 0.9947 | 1.0233 |
| 21    | 1.3704 | 1.2956 | 1.1744 | 1.1542 | 1.0915 | 1.0101 | 1.042  |
| 21.25 | 1.3806 | 1.3083 | 1.1829 | 1.1663 | 1.1083 | 1.0279 | 1.059  |
| 21.5  | 1.39   | 1.3184 | 1.1906 | 1.1817 | 1.1219 | 1.0432 | 1.077  |
| 21.75 | 1.3999 | 1.3289 | 1.2037 | 1.1951 | 1.1376 | 1.0565 | 1.0942 |
| 22    | 1.4093 | 1.3395 | 1.2116 | 1.2081 | 1.1488 | 1.0705 | 1.1102 |
| 22.25 | 1.4189 | 1.3493 | 1.2223 | 1.2179 | 1.1629 | 1.0842 | 1.1294 |
| 22.5  | 1.4278 | 1.3589 | 1.2316 | 1.229  | 1.1764 | 1.0966 | 1.1469 |
| 22.75 | 1.4356 | 1.369  | 1.2391 | 1.2398 | 1.1902 | 1.1075 | 1.1611 |
| 23    | 1.4425 | 1.3781 | 1.2485 | 1.2493 | 1.2017 | 1.1199 | 1.177  |
| 23.25 | 1.4488 | 1.3861 | 1.257  | 1.2606 | 1.2133 | 1.1314 | 1.1898 |
| 23.5  | 1.4527 | 1.3947 | 1.2667 | 1.27   | 1.2242 | 1.1404 | 1.2037 |
| 23.75 | 1.4559 | 1.4037 | 1.2752 | 1.2772 | 1.2366 | 1.1522 | 1.2155 |
| 24    | 1.4583 | 1.4119 | 1.2845 | 1.2872 | 1.2466 | 1.1639 | 1.2269 |
| 24.25 | 1.4609 | 1.4188 | 1.2937 | 1.2957 | 1.2556 | 1.173  | 1.2405 |
| 24.5  | 1.4615 | 1.4276 | 1.3014 | 1.3037 | 1.2656 | 1.185  | 1.2535 |
| 24.75 | 1.4635 | 1.4341 | 1.3101 | 1.3129 | 1.2766 | 1.1942 | 1.2669 |
| 25    | 1.466  | 1.4379 | 1.3177 | 1.3206 | 1.2857 | 1.2037 | 1.2788 |
| 25.25 | 1.4669 | 1.4431 | 1.3269 | 1.3294 | 1.2943 | 1.2123 | 1.2904 |
| 25.5  | 1.4687 | 1.4476 | 1.3358 | 1.3362 | 1.304  | 1.2218 | 1.303  |
| 25.75 | 1.4687 | 1.4518 | 1.345  | 1.3454 | 1.314  | 1.2303 | 1.3137 |
| 26    | 1.4682 | 1.453  | 1.3526 | 1.3515 | 1.3217 | 1.2385 | 1.3242 |
| 26.25 | 1.4704 | 1.4557 | 1.3577 | 1.3592 | 1.3293 | 1.2471 | 1.3337 |
| 26.5  | 1.4702 | 1.4595 | 1.368  | 1.3658 | 1.3359 | 1.2553 | 1.3438 |
| 26.75 | 1.4706 | 1.4619 | 1.3756 | 1.3725 | 1.344  | 1.2646 | 1.3543 |
| 27    | 1.4716 | 1.4639 | 1.3808 | 1.3783 | 1.3513 | 1.2734 | 1.3634 |
| 27.25 | 1.4725 | 1.4677 | 1.3894 | 1.386  | 1.358  | 1.2813 | 1.3738 |
| 27.5  | 1.473  | 1.4709 | 1.396  | 1.3923 | 1.3655 | 1.29   | 1.3818 |
| 27.75 | 1.4747 | 1.4735 | 1.4025 | 1.3969 | 1.3721 | 1.2988 | 1.3897 |
| 28    | 1.4747 | 1.4758 | 1.4095 | 1.4029 | 1.379  | 1.3065 | 1.3993 |
| 28.25 | 1.4772 | 1.4784 | 1.4156 | 1.4107 | 1.3855 | 1.3152 | 1.4071 |

|       |        |        |        |        |        |        |        |
|-------|--------|--------|--------|--------|--------|--------|--------|
| 28.5  | 1.4758 | 1.4806 | 1.4201 | 1.4143 | 1.3909 | 1.3216 | 1.4157 |
| 28.75 | 1.4763 | 1.4813 | 1.4239 | 1.4197 | 1.3972 | 1.3302 | 1.4227 |
| 29    | 1.4771 | 1.4829 | 1.4289 | 1.4249 | 1.4034 | 1.3365 | 1.4296 |
| 29.25 | 1.4786 | 1.485  | 1.4341 | 1.4291 | 1.4097 | 1.3439 | 1.4386 |
| 29.5  | 1.4803 | 1.4861 | 1.4367 | 1.4366 | 1.4138 | 1.3509 | 1.4448 |
| 29.75 | 1.4807 | 1.4866 | 1.4387 | 1.44   | 1.4201 | 1.3569 | 1.452  |
| 30    | 1.4823 | 1.4892 | 1.4412 | 1.4465 | 1.4267 | 1.366  | 1.4603 |
| 30.25 | 1.4831 | 1.49   | 1.4444 | 1.4503 | 1.4337 | 1.3728 | 1.4676 |
| 30.5  | 1.4829 | 1.4913 | 1.4444 | 1.4553 | 1.4388 | 1.38   | 1.474  |
| 30.75 | 1.4823 | 1.4923 | 1.4446 | 1.4597 | 1.442  | 1.3863 | 1.4811 |
| 31    | 1.4825 | 1.4929 | 1.4466 | 1.4634 | 1.4486 | 1.3921 | 1.4878 |
| 31.25 | 1.4843 | 1.4939 | 1.448  | 1.4682 | 1.4533 | 1.3991 | 1.4965 |
| 31.5  | 1.4842 | 1.496  | 1.4475 | 1.4727 | 1.4578 | 1.4053 | 1.5008 |
| 31.75 | 1.4837 | 1.4956 | 1.4475 | 1.4761 | 1.4628 | 1.411  | 1.5075 |
| 32    | 1.4837 | 1.4964 | 1.4488 | 1.4805 | 1.4666 | 1.4188 | 1.5156 |
| 32.25 | 1.4847 | 1.4969 | 1.4483 | 1.486  | 1.4701 | 1.424  | 1.5207 |
| 32.5  | 1.4848 | 1.4964 | 1.448  | 1.4892 | 1.4757 | 1.4288 | 1.5268 |
| 32.75 | 1.4858 | 1.4974 | 1.448  | 1.4935 | 1.4817 | 1.4359 | 1.5326 |
| 33    | 1.4867 | 1.4992 | 1.4467 | 1.4974 | 1.4855 | 1.4413 | 1.5393 |
| 33.25 | 1.4876 | 1.498  | 1.4476 | 1.5006 | 1.4892 | 1.4475 | 1.5441 |
| 33.5  | 1.4885 | 1.4993 | 1.4481 | 1.5044 | 1.4936 | 1.4525 | 1.5491 |
| 33.75 | 1.4883 | 1.4994 | 1.4469 | 1.5074 | 1.4981 | 1.4574 | 1.5526 |
| 34    | 1.4888 | 1.4988 | 1.4474 | 1.5101 | 1.5033 | 1.4619 | 1.5568 |
| 34.25 | 1.4892 | 1.4995 | 1.4471 | 1.512  | 1.5068 | 1.4677 | 1.5597 |
| 34.5  | 1.4899 | 1.4996 | 1.4474 | 1.5145 | 1.5102 | 1.4733 | 1.5621 |
| 34.75 | 1.4919 | 1.5003 | 1.4472 | 1.5155 | 1.5153 | 1.4773 | 1.5635 |
| 35    | 1.492  | 1.5014 | 1.4486 | 1.5177 | 1.5195 | 1.4834 | 1.567  |
| 35.25 | 1.4922 | 1.502  | 1.4486 | 1.5193 | 1.5237 | 1.4884 | 1.5653 |
| 35.5  | 1.4933 | 1.5004 | 1.4477 | 1.5197 | 1.5256 | 1.4917 | 1.5663 |
| 35.75 | 1.4939 | 1.5019 | 1.4479 | 1.5201 | 1.5274 | 1.4969 | 1.5664 |
| 36    | 1.4951 | 1.5018 | 1.4476 | 1.521  | 1.5306 | 1.5019 | 1.5667 |
| 36.25 | 1.4965 | 1.5015 | 1.4469 | 1.5219 | 1.5328 | 1.5049 | 1.567  |
| 36.5  | 1.4976 | 1.5021 | 1.4473 | 1.5236 | 1.5336 | 1.5101 | 1.5677 |
| 36.75 | 1.4983 | 1.5037 | 1.4481 | 1.5256 | 1.5382 | 1.5145 | 1.5683 |
| 37    | 1.4992 | 1.5034 | 1.4477 | 1.5248 | 1.5385 | 1.5177 | 1.5678 |
| 37.25 | 1.4997 | 1.504  | 1.449  | 1.5254 | 1.5399 | 1.5237 | 1.5691 |
| 37.5  | 1.5011 | 1.5037 | 1.4489 | 1.5252 | 1.5408 | 1.527  | 1.5706 |
| 37.75 | 1.502  | 1.505  | 1.4486 | 1.5271 | 1.5429 | 1.5327 | 1.571  |
| 38    | 1.5029 | 1.5047 | 1.4475 | 1.528  | 1.5435 | 1.5359 | 1.5717 |
| 38.25 | 1.5029 | 1.5046 | 1.449  | 1.5279 | 1.544  | 1.538  | 1.5721 |
| 38.5  | 1.504  | 1.505  | 1.4481 | 1.5279 | 1.5457 | 1.5408 | 1.5726 |
| 38.75 | 1.5035 | 1.5042 | 1.448  | 1.5287 | 1.5472 | 1.543  | 1.5711 |

|       |        |        |        |        |        |        |        |
|-------|--------|--------|--------|--------|--------|--------|--------|
| 39    | 1.5042 | 1.505  | 1.4488 | 1.5291 | 1.548  | 1.5456 | 1.5718 |
| 39.25 | 1.5058 | 1.5049 | 1.4482 | 1.5296 | 1.548  | 1.5484 | 1.5719 |
| 39.5  | 1.507  | 1.5052 | 1.4485 | 1.5299 | 1.5493 | 1.551  | 1.5717 |
| 39.75 | 1.5073 | 1.506  | 1.4484 | 1.5302 | 1.5508 | 1.5521 | 1.5709 |
| 40    | 1.5077 | 1.5062 | 1.4489 | 1.5311 | 1.5521 | 1.554  | 1.572  |
| 40.25 | 1.5093 | 1.5063 | 1.4496 | 1.5324 | 1.5526 | 1.5565 | 1.572  |
| 40.5  | 1.5096 | 1.506  | 1.4489 | 1.5317 | 1.5535 | 1.5549 | 1.5714 |
| 40.75 | 1.5108 | 1.5059 | 1.4494 | 1.533  | 1.5544 | 1.5574 | 1.571  |
| 41    | 1.5129 | 1.5053 | 1.4485 | 1.5331 | 1.5542 | 1.5581 | 1.5718 |
| 41.25 | 1.5127 | 1.5048 | 1.4491 | 1.5337 | 1.554  | 1.5607 | 1.5712 |
| 41.5  | 1.513  | 1.5052 | 1.4495 | 1.5334 | 1.5543 | 1.5621 | 1.5708 |
| 41.75 | 1.513  | 1.5045 | 1.4496 | 1.5326 | 1.5559 | 1.563  | 1.5701 |
| 42    | 1.5143 | 1.506  | 1.4492 | 1.5346 | 1.5564 | 1.5628 | 1.5697 |
| 42.25 | 1.5164 | 1.506  | 1.4512 | 1.5348 | 1.5575 | 1.5641 | 1.5698 |
| 42.5  | 1.5166 | 1.5062 | 1.4516 | 1.5349 | 1.5583 | 1.5654 | 1.5695 |
| 42.75 | 1.518  | 1.506  | 1.4518 | 1.5357 | 1.558  | 1.5661 | 1.5689 |
| 43    | 1.5154 | 1.5053 | 1.4522 | 1.5352 | 1.5574 | 1.5681 | 1.5689 |
| 43.25 | 1.5129 | 1.5059 | 1.4522 | 1.5358 | 1.5593 | 1.5692 | 1.5678 |
| 43.5  | 1.5111 | 1.5064 | 1.4527 | 1.5348 | 1.5589 | 1.5696 | 1.5676 |
| 43.75 | 1.5114 | 1.5084 | 1.453  | 1.5351 | 1.5604 | 1.5712 | 1.5672 |
| 44    | 1.5125 | 1.5078 | 1.4529 | 1.5363 | 1.561  | 1.5719 | 1.5664 |
| 44.25 | 1.5102 | 1.5073 | 1.4529 | 1.5355 | 1.5603 | 1.5719 | 1.5671 |
| 44.5  | 1.5105 | 1.5065 | 1.4523 | 1.5349 | 1.5594 | 1.5716 | 1.5656 |
| 44.75 | 1.5104 | 1.5065 | 1.454  | 1.5358 | 1.5604 | 1.5725 | 1.5654 |
| 45    | 1.5092 | 1.5064 | 1.4543 | 1.536  | 1.5607 | 1.5736 | 1.5644 |
| 45.25 | 1.5105 | 1.5057 | 1.4541 | 1.5375 | 1.5618 | 1.5732 | 1.5655 |
| 45.5  | 1.5103 | 1.5065 | 1.4557 | 1.5374 | 1.5626 | 1.5737 | 1.5652 |
| 45.75 | 1.51   | 1.5067 | 1.4559 | 1.5374 | 1.5623 | 1.575  | 1.5655 |
| 46    | 1.5108 | 1.5061 | 1.4561 | 1.5386 | 1.563  | 1.5746 | 1.5648 |
| 46.25 | 1.5109 | 1.5064 | 1.456  | 1.5371 | 1.5638 | 1.5747 | 1.5642 |
| 46.5  | 1.511  | 1.5069 | 1.4571 | 1.5388 | 1.5635 | 1.5758 | 1.5653 |
| 46.75 | 1.511  | 1.5052 | 1.4577 | 1.5373 | 1.5622 | 1.5758 | 1.5637 |
| 47    | 1.5111 | 1.5059 | 1.4574 | 1.538  | 1.5626 | 1.5759 | 1.563  |
| 47.25 | 1.5102 | 1.5042 | 1.4571 | 1.5377 | 1.5623 | 1.5755 | 1.5637 |
| 47.5  | 1.5112 | 1.5044 | 1.4583 | 1.537  | 1.5626 | 1.5757 | 1.5632 |
| 47.75 | 1.5109 | 1.5036 | 1.4575 | 1.537  | 1.5627 | 1.5758 | 1.5631 |
| 48    | 1.511  | 1.5046 | 1.4582 | 1.536  | 1.563  | 1.5759 | 1.564  |
| 48.25 | 1.511  | 1.5042 | 1.4587 | 1.5359 | 1.5617 | 1.5755 | 1.5644 |
| 48.5  | 1.5111 | 1.504  | 1.4592 | 1.5366 | 1.5619 | 1.5759 | 1.5636 |
| 48.75 | 1.5107 | 1.5019 | 1.4578 | 1.536  | 1.5626 | 1.5757 | 1.5625 |
| 49    | 1.5112 | 1.5026 | 1.4586 | 1.5354 | 1.5617 | 1.575  | 1.563  |
| 49.25 | 1.5109 | 1.5034 | 1.4604 | 1.5365 | 1.5621 | 1.5767 | 1.5623 |

|       |        |        |        |        |        |        |        |
|-------|--------|--------|--------|--------|--------|--------|--------|
| 49.5  | 1.5094 | 1.504  | 1.4603 | 1.5365 | 1.563  | 1.5763 | 1.5626 |
| 49.75 | 1.5105 | 1.5038 | 1.4602 | 1.5359 | 1.5631 | 1.5763 | 1.5628 |

|  | <b>G21</b>      | <b>G22</b>   | <b>G23</b>    | <b>G24</b>    |
|--|-----------------|--------------|---------------|---------------|
|  | <b>NOVO 250</b> | <b>RAD 3</b> | <b>RAD 10</b> | <b>RAD 30</b> |
|  | 0.3513          | 0.1754       | 0.1913        | 0.1798        |
|  | 0.3371          | 0.1633       | 0.1811        | 0.1735        |
|  | 0.3289          | 0.1617       | 0.175         | 0.1715        |
|  | 0.321           | 0.1602       | 0.1741        | 0.1707        |
|  | 0.3159          | 0.1598       | 0.172         | 0.1692        |
|  |                 |              | 0.1712        | 0.1689        |
|  |                 |              | 0.1712        | 0.1682        |
|  |                 |              | 0.1699        | 0.1683        |
|  |                 |              | 0.1704        | 0.167         |
|  |                 |              | 0.1701        | 0.1672        |
|  |                 |              | 0.1703        | 0.1672        |
|  |                 |              | 0.1707        | 0.1658        |
|  |                 |              | 0.17          | 0.1646        |
|  |                 |              | 0.1707        | 0.1652        |
|  |                 |              | 0.1706        | 0.1649        |
|  |                 |              | 0.1717        | 0.1656        |
|  |                 |              | 0.1729        | 0.1656        |
|  |                 |              | 0.1741        | 0.1666        |
|  |                 |              | 0.1758        | 0.1659        |
|  |                 |              | 0.1771        | 0.1679        |
|  |                 |              | 0.1788        | 0.1691        |
|  |                 |              | 0.1801        | 0.1693        |
|  |                 |              | 0.1821        | 0.1703        |
|  |                 |              | 0.1836        | 0.1721        |
|  |                 |              | 0.1868        | 0.1736        |
|  |                 |              | 0.1899        | 0.1753        |
|  |                 |              | 0.1931        | 0.1769        |
|  |                 |              | 0.1957        | 0.1789        |
|  |                 |              | 0.1992        | 0.1797        |
|  |                 |              | 0.2027        | 0.1828        |

- ◆ WT
- WT(GA 3)
- ▲ WT(RAD 3)
- × NO DRUG
- \* GA 3uM
- GA 7uM
- + NOVO 100
- NOVO 250
- RAD 3
- ◆ RAD 10

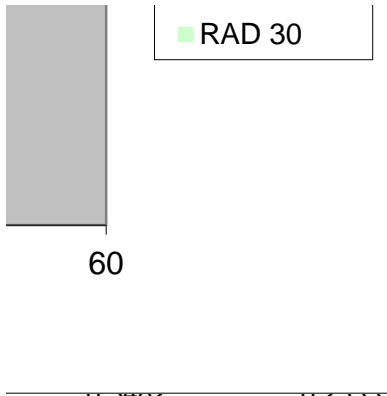

|        |        |        |        |
|--------|--------|--------|--------|
| 0.3482 | 0.2555 | 0.2067 | 0.1842 |
| 0.3525 | 0.2624 | 0.2104 | 0.1867 |
| 0.3578 | 0.2697 | 0.2141 | 0.1879 |
| 0.3624 | 0.2786 | 0.2193 | 0.1912 |
| 0.3671 | 0.287  | 0.2235 | 0.1935 |
| 0.3728 | 0.2959 | 0.2288 | 0.1971 |
| 0.3783 | 0.3057 | 0.2346 | 0.1986 |
| 0.3832 | 0.3149 | 0.2405 | 0.2016 |
| 0.3894 | 0.3242 | 0.2463 | 0.2047 |
| 0.3922 | 0.3316 | 0.253  | 0.2083 |
| 0.3976 | 0.3416 | 0.2603 | 0.2117 |
| 0.4019 | 0.3506 | 0.2665 | 0.2152 |
| 0.406  | 0.3613 | 0.2754 | 0.2188 |
| 0.4091 | 0.3723 | 0.2824 | 0.2225 |
| 0.4031 | 0.3848 | 0.2897 | 0.2266 |
| 0.4047 | 0.3978 | 0.2986 | 0.2306 |
| 0.4111 | 0.4116 | 0.3073 | 0.2344 |
| 0.418  | 0.4263 | 0.3162 | 0.239  |
| 0.4266 | 0.4419 | 0.3258 | 0.2431 |
| 0.4346 | 0.4598 | 0.3343 | 0.2481 |
| 0.441  | 0.477  | 0.3436 | 0.2529 |
| 0.4499 | 0.4959 | 0.3535 | 0.2582 |
| 0.4562 | 0.5121 | 0.363  | 0.2636 |
| 0.4653 | 0.532  | 0.3707 | 0.2692 |
| 0.4786 | 0.5509 | 0.3794 | 0.2739 |
| 0.4975 | 0.5771 | 0.3883 | 0.2797 |
| 0.4978 | 0.5878 | 0.3993 | 0.2852 |
| 0.5067 | 0.6091 | 0.4093 | 0.2908 |
| 0.5127 | 0.629  | 0.4217 | 0.2962 |
| 0.5225 | 0.6518 | 0.4335 | 0.3036 |
| 0.5321 | 0.6752 | 0.4456 | 0.3068 |
|        |        | 0.4585 | 0.3123 |
|        |        | 0.4721 | 0.3188 |
|        |        | 0.4853 | 0.3253 |
|        |        | 0.4966 | 0.3308 |
|        |        | 0.5096 | 0.3389 |
|        |        | 0.5252 | 0.3462 |
|        |        | 0.5405 | 0.3539 |
|        |        | 0.5547 | 0.3614 |
|        |        | 0.5698 | 0.3695 |
|        |        | 0.5822 | 0.3763 |
|        |        | 0.5991 | 0.3845 |

|        |        |        |        |
|--------|--------|--------|--------|
| 0.5372 | 0.6954 | 0.6236 | 0.3896 |
| 0.5445 | 0.7182 | 0.6423 | 0.3963 |
| 0.5518 | 0.7385 | 0.6583 | 0.4028 |
| 0.5641 | 0.7591 | 0.6761 | 0.4089 |
| 0.5733 | 0.7775 | 0.6952 | 0.412  |
| 0.5813 | 0.7993 | 0.7129 | 0.419  |
| 0.5929 | 0.8177 | 0.7282 | 0.4266 |
| 0.6035 | 0.8366 | 0.7487 | 0.435  |
| 0.6133 | 0.8581 | 0.7634 | 0.4471 |
| 0.6227 | 0.8769 | 0.7807 | 0.4564 |
| 0.6328 | 0.8995 | 0.7982 | 0.4629 |
| 0.6423 | 0.9196 | 0.8131 | 0.4747 |
| 0.6516 | 0.9384 | 0.8278 | 0.4816 |
| 0.6611 | 0.9581 | 0.8403 | 0.4899 |
| 0.6717 | 0.9764 | 0.855  | 0.4982 |
| 0.6815 | 0.9922 | 0.8666 | 0.5072 |
| 0.6916 | 1.0095 | 0.883  | 0.5144 |
| 0.7008 | 1.0233 | 0.8956 | 0.5249 |
| 0.7114 | 1.0386 | 0.9082 | 0.5346 |
| 0.7232 | 1.0538 | 0.9186 | 0.542  |
| 0.7322 | 1.0686 | 0.9324 | 0.5515 |
| 0.7433 | 1.0848 | 0.9457 | 0.5604 |
| 0.7531 | 1.1005 | 0.956  | 0.5702 |
| 0.7607 | 1.1141 | 0.9666 | 0.5796 |
| 0.7696 | 1.1242 | 0.976  | 0.5892 |
| 0.7814 | 1.1377 | 0.9853 | 0.5972 |
| 0.7917 | 1.1504 | 0.9969 | 0.6074 |
| 0.8023 | 1.1618 | 1.007  | 0.6159 |
| 0.8139 | 1.1734 | 1.0132 | 0.6252 |
| 0.8217 | 1.1837 | 1.0247 | 0.6322 |
| 0.8326 | 1.1937 | 1.0346 | 0.6422 |
| 0.8421 | 1.2043 | 1.0461 | 0.6508 |
| 0.8498 | 1.2159 | 1.0532 | 0.6588 |
| 0.8601 | 1.2254 | 1.0592 | 0.6665 |
| 0.8713 | 1.2356 | 1.0667 | 0.6757 |
| 0.8815 | 1.2438 | 1.0766 | 0.688  |
| 0.8912 | 1.2516 | 1.0834 | 0.6981 |
| 0.9028 | 1.259  | 1.0925 | 0.7041 |
| 0.9122 | 1.2669 | 1.0973 | 0.7108 |
| 0.9221 | 1.2762 | 1.1021 | 0.7192 |
| 0.9322 | 1.2826 | 1.1028 | 0.7267 |
| 0.9432 | 1.2898 | 1.1187 | 0.737  |

|        |        |        |        |
|--------|--------|--------|--------|
| 0.9531 | 1.2965 | 1.1286 | 0.7466 |
| 0.9629 | 1.3036 | 1.1352 | 0.7546 |
| 0.9709 | 1.3094 | 1.1405 | 0.7626 |
| 0.9824 | 1.3171 | 1.1482 | 0.7696 |
| 0.9916 | 1.3229 | 1.1511 | 0.7751 |
| 1.005  | 1.3281 | 1.1555 | 0.7832 |
| 1.0133 | 1.3344 | 1.1679 | 0.7937 |
| 1.0252 | 1.3399 | 1.1765 | 0.801  |
| 1.0343 | 1.3444 | 1.1816 | 0.8076 |
| 1.0464 | 1.3512 | 1.1912 | 0.815  |
| 1.0554 | 1.3559 | 1.1976 | 0.8216 |
| 1.0674 | 1.3621 | 1.2074 | 0.8283 |
| 1.076  | 1.3669 | 1.2102 | 0.8352 |
| 1.0867 | 1.3726 | 1.2162 | 0.8421 |
| 1.0949 | 1.3785 | 1.222  | 0.8448 |
| 1.1048 | 1.3817 | 1.2286 | 0.8505 |
| 1.1143 | 1.3887 | 1.2304 | 0.8538 |
| 1.1251 | 1.3918 | 1.2365 | 0.8618 |
| 1.1358 | 1.3977 | 1.2447 | 0.8691 |
| 1.1451 | 1.4024 | 1.2508 | 0.8773 |
| 1.1552 | 1.4097 | 1.256  | 0.8844 |
| 1.1651 | 1.4148 | 1.2604 | 0.8905 |
| 1.1759 | 1.4203 | 1.2659 | 0.8952 |
| 1.1848 | 1.4248 | 1.2697 | 0.9012 |
| 1.1948 | 1.4264 | 1.2696 | 0.9056 |
| 1.2038 | 1.4294 | 1.2731 | 0.9136 |
| 1.2139 | 1.4344 | 1.2849 | 0.9258 |
| 1.2197 | 1.4373 | 1.2893 | 0.9327 |
| 1.2298 | 1.4409 | 1.2945 | 0.9371 |
| 1.2383 | 1.4456 | 1.3004 | 0.9421 |
| 1.2456 | 1.4479 | 1.3001 | 0.9466 |
| 1.2542 | 1.4514 | 1.2977 | 0.9502 |
| 1.2635 | 1.4564 | 1.2999 | 0.9555 |
| 1.2692 | 1.4588 | 1.3055 | 0.9621 |
| 1.2781 | 1.4626 | 1.3171 | 0.9743 |
| 1.2842 | 1.4667 | 1.3226 | 0.9818 |
| 1.2934 | 1.4687 | 1.3275 | 0.9874 |
| 1.3022 | 1.4731 | 1.3325 | 0.9948 |
| 1.3081 | 1.4763 | 1.338  | 1.002  |
| 1.3157 | 1.479  | 1.3414 | 1.0064 |
| 1.3239 | 1.4812 | 1.3471 | 1.0127 |
| 1.3293 | 1.4826 | 1.3513 | 1.0205 |



|        |        |        |        |
|--------|--------|--------|--------|
| 1.3375 | 1.4855 | 1.3538 | 1.0244 |
| 1.3451 | 1.4875 | 1.3596 | 1.0328 |
| 1.353  | 1.4885 | 1.3638 | 1.0348 |
| 1.3599 | 1.4899 | 1.3643 | 1.0385 |
| 1.3665 | 1.4918 | 1.3627 | 1.0401 |
| 1.3735 | 1.4924 | 1.3648 | 1.0466 |
| 1.3802 | 1.4928 | 1.3712 | 1.0515 |
| 1.3867 | 1.4937 | 1.3813 | 1.0635 |
| 1.3933 | 1.4949 | 1.3865 | 1.0703 |
| 1.3999 | 1.4954 | 1.392  | 1.077  |
| 1.4059 | 1.4956 | 1.3966 | 1.0807 |
| 1.4125 | 1.4952 | 1.3941 | 1.0845 |
| 1.4187 | 1.4966 | 1.3954 | 1.0863 |
| 1.425  | 1.4972 | 1.3986 | 1.0921 |
| 1.4305 | 1.4982 | 1.4011 | 1.0972 |
| 1.4363 | 1.4974 | 1.4058 | 1.1045 |
| 1.4426 | 1.4972 | 1.4155 | 1.1118 |
| 1.4483 | 1.4975 | 1.418  | 1.1165 |
| 1.4543 | 1.4986 | 1.4202 | 1.1207 |
| 1.4609 | 1.4991 | 1.4238 | 1.1251 |
| 1.466  | 1.498  | 1.4259 | 1.1304 |
| 1.4705 | 1.4995 | 1.4299 | 1.1344 |
| 1.4743 | 1.4974 | 1.4329 | 1.1419 |
| 1.4795 | 1.4983 | 1.4361 | 1.1462 |
| 1.4826 | 1.4976 | 1.4397 | 1.1492 |
| 1.485  | 1.4977 | 1.4431 | 1.1539 |
| 1.4871 | 1.4981 | 1.4493 | 1.1634 |
| 1.4885 | 1.4986 | 1.4541 | 1.1699 |
| 1.4897 | 1.4978 | 1.4586 | 1.1767 |
| 1.4906 | 1.4976 | 1.464  | 1.1833 |
| 1.4917 | 1.4985 | 1.4687 | 1.1894 |
| 1.4906 | 1.4974 | 1.4711 | 1.1945 |
| 1.4893 | 1.497  | 1.4758 | 1.2004 |
| 1.4884 | 1.4977 | 1.4763 | 1.2054 |
| 1.4894 | 1.4964 | 1.479  | 1.2091 |
| 1.4888 | 1.4967 | 1.4792 | 1.2134 |
| 1.4882 | 1.4976 | 1.4802 | 1.2165 |
| 1.4876 | 1.4963 | 1.4801 | 1.2241 |
| 1.4885 | 1.4958 | 1.4804 | 1.2279 |
| 1.4888 | 1.4956 | 1.4794 | 1.2313 |
| 1.4897 | 1.4956 | 1.4809 | 1.2367 |
| 1.4896 | 1.4956 | 1.4807 | 1.2418 |

|        |        |        |        |
|--------|--------|--------|--------|
| 1.4886 | 1.4955 | 1.483  | 1.2469 |
| 1.4892 | 1.4942 | 1.4851 | 1.2537 |

|      |        |          |           | H9      | H10    | H11    | H12     | H13      | H14    | H15    | H16    |
|------|--------|----------|-----------|---------|--------|--------|---------|----------|--------|--------|--------|
| TIME | WT     | WT(GA 3) | WT(RAD 3) | NO DRUG | GA 3uM | GA 7uM | NOVO 10 | NOVO 250 | RAD 3  | RAD 10 | RAD 30 |
| 0    | 0.1894 | 0.2051   | 0.1892    | 0.1727  | 0.1708 | 0.1711 | 0.2079  | 0.2434   | 0.1633 | 0.1674 | 0.1698 |
| 0.25 | 0.1844 | 0.1929   | 0.1812    | 0.1639  | 0.1653 | 0.164  | 0.2146  | 0.246    | 0.1545 | 0.1622 | 0.1647 |
| 0.5  | 0.1833 | 0.1912   | 0.1787    | 0.1635  | 0.1618 | 0.1596 | 0.2166  | 0.249    | 0.1541 | 0.1608 | 0.1645 |
| 0.75 | 0.1838 | 0.189    | 0.1758    | 0.1628  | 0.1621 | 0.1589 | 0.2164  | 0.2514   | 0.1533 | 0.1596 | 0.1645 |
| 1    | 0.1843 | 0.1877   | 0.1818    | 0.1633  | 0.1602 | 0.1577 | 0.2165  | 0.2551   | 0.1537 | 0.1596 | 0.1641 |
| 1.25 | 0.1867 | 0.1862   | 0.1836    | 0.1637  | 0.1608 | 0.1591 | 0.2143  | 0.2521   | 0.1549 | 0.1596 | 0.1647 |
| 1.5  | 0.188  | 0.186    | 0.1823    | 0.1648  | 0.1624 | 0.1604 | 0.2132  | 0.2491   | 0.1561 | 0.1607 | 0.1652 |

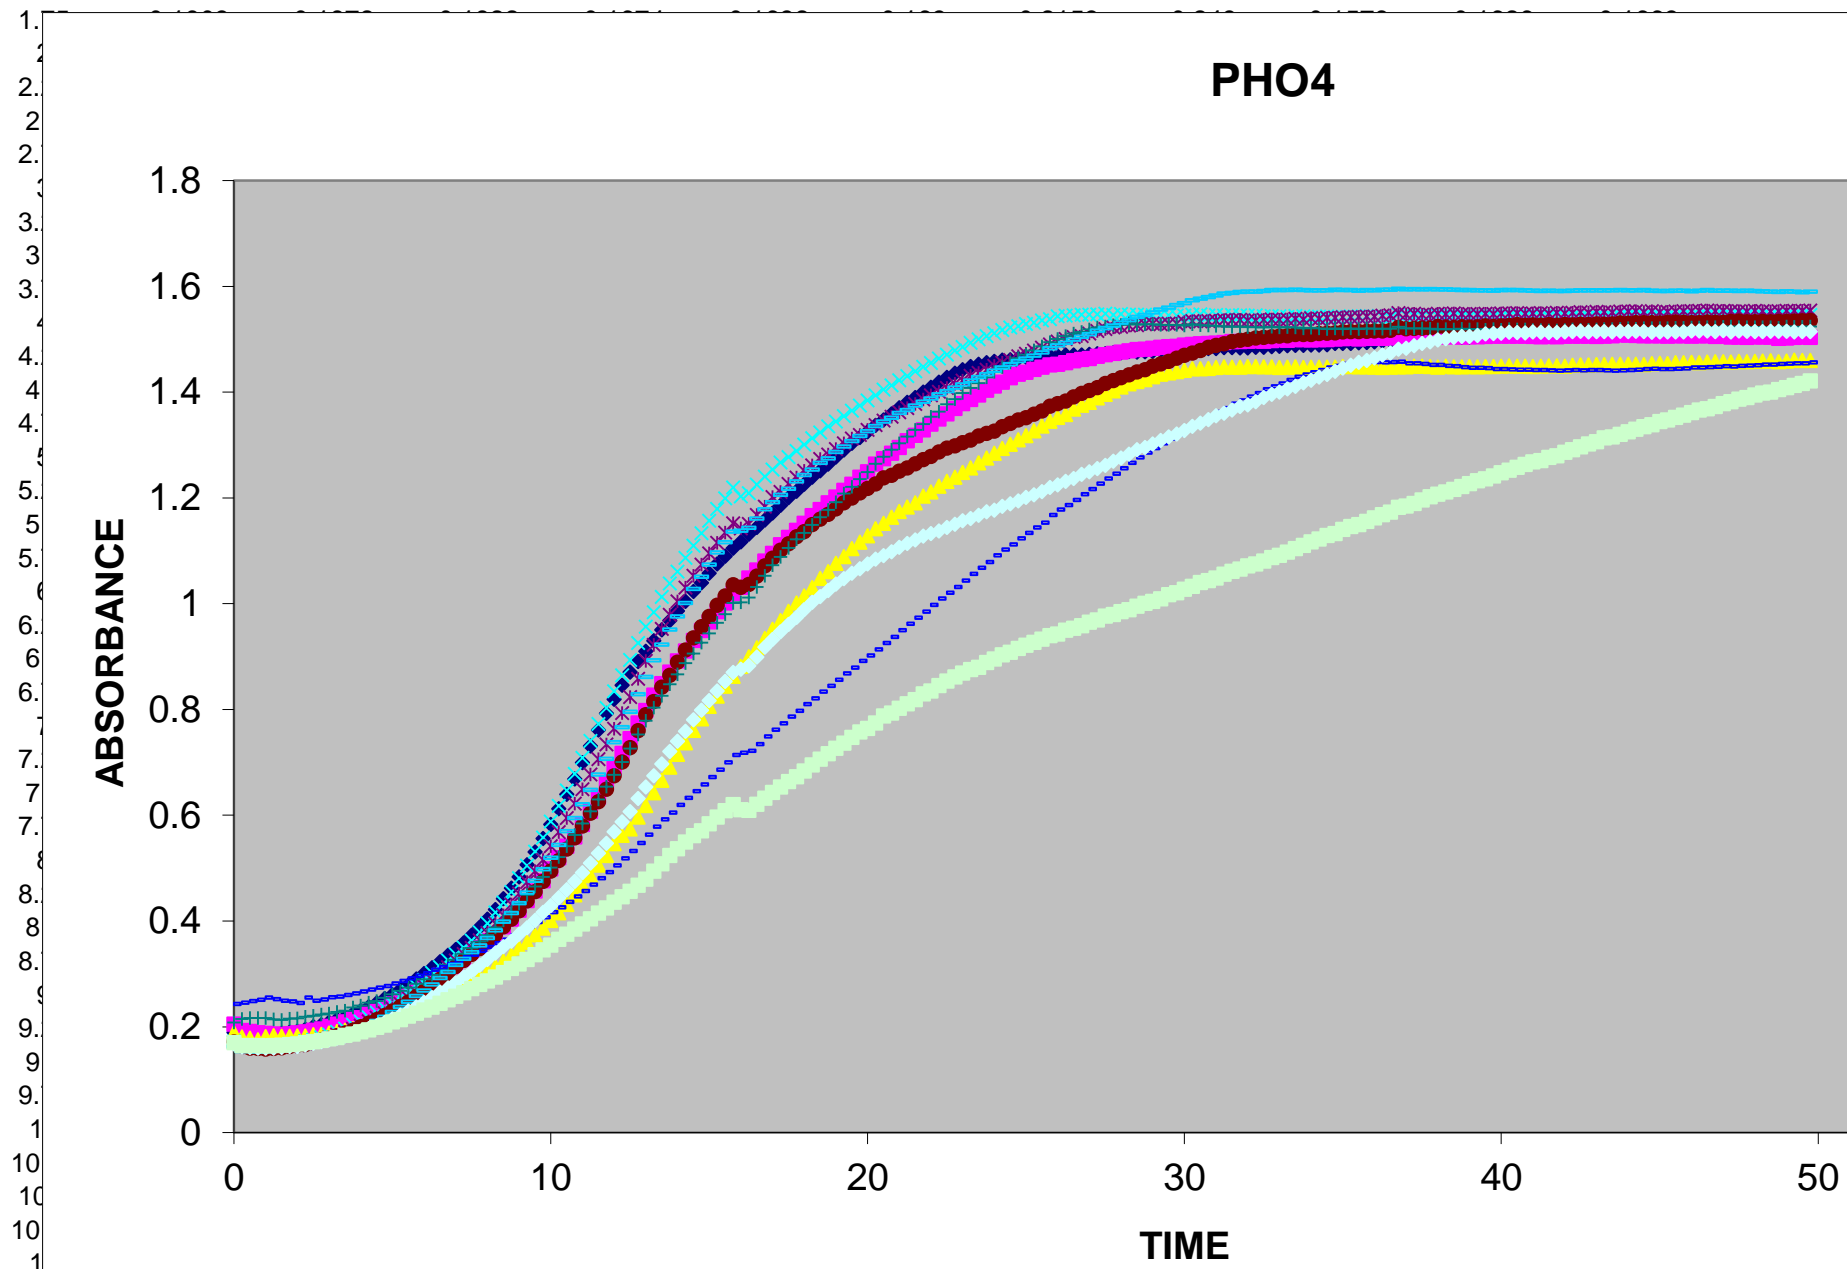

|       |        |        |        |        |        |        |        |        |        |        |        |
|-------|--------|--------|--------|--------|--------|--------|--------|--------|--------|--------|--------|
| 11.5  | 0.7614 | 0.6339 | 0.5059 | 0.7728 | 0.7059 | 0.6258 | 0.6296 | 0.4811 | 0.6768 | 0.5285 | 0.4149 |
| 11.75 | 0.7927 | 0.6618 | 0.5242 | 0.8032 | 0.7337 | 0.6493 | 0.6541 | 0.4924 | 0.7067 | 0.5472 | 0.4248 |
| 12    | 0.8194 | 0.6889 | 0.5464 | 0.8345 | 0.7634 | 0.6747 | 0.6765 | 0.5052 | 0.7379 | 0.5686 | 0.4356 |

|       |        |        |        |        |        |        |        |        |        |        |        |
|-------|--------|--------|--------|--------|--------|--------|--------|--------|--------|--------|--------|
| 12.25 | 0.8459 | 0.7168 | 0.5622 | 0.8646 | 0.793  | 0.7006 | 0.7006 | 0.5187 | 0.7664 | 0.5876 | 0.4457 |
| 12.5  | 0.8706 | 0.7448 | 0.5743 | 0.8938 | 0.8237 | 0.7278 | 0.7259 | 0.5322 | 0.7955 | 0.6072 | 0.4562 |
| 12.75 | 0.8904 | 0.7744 | 0.5968 | 0.926  | 0.8578 | 0.76   | 0.753  | 0.5477 | 0.829  | 0.6316 | 0.4678 |
| 13    | 0.9099 | 0.7982 | 0.6186 | 0.9569 | 0.8918 | 0.7901 | 0.7786 | 0.5634 | 0.8617 | 0.6532 | 0.479  |
| 13.25 | 0.9301 | 0.8269 | 0.6426 | 0.9837 | 0.9219 | 0.815  | 0.8036 | 0.5787 | 0.893  | 0.6746 | 0.4944 |
| 13.5  | 0.9508 | 0.849  | 0.6665 | 1.0128 | 0.9526 | 0.8422 | 0.8259 | 0.5925 | 0.9228 | 0.697  | 0.5085 |
| 13.75 | 0.9679 | 0.8707 | 0.6913 | 1.0383 | 0.979  | 0.8648 | 0.8477 | 0.6053 | 0.9512 | 0.7206 | 0.5239 |
| 14    | 0.986  | 0.8918 | 0.7152 | 1.0609 | 1.0043 | 0.8895 | 0.8667 | 0.6194 | 0.9758 | 0.74   | 0.5365 |
| 14.25 | 1.0047 | 0.9106 | 0.7372 | 1.0865 | 1.0302 | 0.9127 | 0.8875 | 0.6329 | 1.0015 | 0.7585 | 0.5494 |
| 14.5  | 1.0233 | 0.9308 | 0.7608 | 1.1098 | 1.0526 | 0.9355 | 0.9057 | 0.6455 | 1.0279 | 0.7807 | 0.5613 |
| 14.75 | 1.0397 | 0.9491 | 0.7825 | 1.133  | 1.074  | 0.9565 | 0.9263 | 0.6583 | 1.0509 | 0.7988 | 0.5707 |
| 15    | 1.0577 | 0.966  | 0.8057 | 1.1566 | 1.0954 | 0.976  | 0.9439 | 0.6723 | 1.0741 | 0.817  | 0.5837 |
| 15.25 | 1.0753 | 0.9853 | 0.8251 | 1.1794 | 1.1151 | 0.9969 | 0.9636 | 0.6864 | 1.0969 | 0.8349 | 0.5964 |
| 15.5  | 1.0897 | 1.0015 | 0.8439 | 1.1992 | 1.1345 | 1.0149 | 0.9802 | 0.7003 | 1.1165 | 0.8533 | 0.6085 |
| 15.75 | 1.1049 | 1.0198 | 0.8628 | 1.22   | 1.1521 | 1.0358 | 1.0016 | 0.714  | 1.1366 | 0.8698 | 0.62   |
| 16    | 1.1171 | 1.031  | 0.8817 | 1.2029 | 1.1425 | 1.031  | 1.0028 | 0.7184 | 1.1382 | 0.8763 | 0.6107 |
| 16.25 | 1.1316 | 1.0487 | 0.8996 | 1.2088 | 1.1508 | 1.0362 | 1.0115 | 0.7216 | 1.1433 | 0.883  | 0.6092 |
| 16.5  | 1.1443 | 1.0637 | 0.9165 | 1.225  | 1.1679 | 1.0522 | 1.0314 | 0.7347 | 1.1609 | 0.8993 | 0.6211 |
| 16.75 | 1.1579 | 1.0806 | 0.9342 | 1.2406 | 1.1837 | 1.0713 | 1.0528 | 0.7489 | 1.1785 | 0.9181 | 0.6325 |
| 17    | 1.1715 | 1.0952 | 0.9517 | 1.2539 | 1.2015 | 1.086  | 1.073  | 0.762  | 1.192  | 0.9326 | 0.6432 |
| 17.25 | 1.1858 | 1.1114 | 0.9682 | 1.2668 | 1.2111 | 1.1013 | 1.0888 | 0.7738 | 1.2056 | 0.947  | 0.6537 |
| 17.5  | 1.2004 | 1.1256 | 0.9855 | 1.2773 | 1.2262 | 1.1132 | 1.1053 | 0.7868 | 1.2172 | 0.961  | 0.6639 |
| 17.75 | 1.2123 | 1.1388 | 1.0016 | 1.2889 | 1.2385 | 1.1266 | 1.1215 | 0.7974 | 1.2316 | 0.974  | 0.673  |
| 18    | 1.2261 | 1.1522 | 1.015  | 1.3011 | 1.251  | 1.1366 | 1.1339 | 0.8104 | 1.2437 | 0.9887 | 0.6837 |
| 18.25 | 1.239  | 1.1664 | 1.0307 | 1.3131 | 1.2618 | 1.1495 | 1.1489 | 0.821  | 1.2538 | 1.0028 | 0.695  |
| 18.5  | 1.251  | 1.1779 | 1.0478 | 1.3238 | 1.2736 | 1.1597 | 1.1637 | 0.8339 | 1.2667 | 1.0133 | 0.7061 |
| 18.75 | 1.2641 | 1.1907 | 1.0607 | 1.3351 | 1.282  | 1.169  | 1.1777 | 0.8449 | 1.2749 | 1.0251 | 0.7163 |
| 19    | 1.2773 | 1.2018 | 1.0765 | 1.3445 | 1.2924 | 1.1795 | 1.1922 | 0.8559 | 1.2872 | 1.0369 | 0.7267 |
| 19.25 | 1.2907 | 1.2145 | 1.0891 | 1.3547 | 1.3033 | 1.1908 | 1.2085 | 0.8684 | 1.2974 | 1.0474 | 0.7361 |
| 19.5  | 1.3032 | 1.2259 | 1.1041 | 1.3651 | 1.3123 | 1.1999 | 1.2211 | 0.8793 | 1.3074 | 1.0575 | 0.7473 |
| 19.75 | 1.3141 | 1.239  | 1.1166 | 1.3749 | 1.3192 | 1.2093 | 1.2358 | 0.8917 | 1.317  | 1.066  | 0.7574 |
| 20    | 1.3251 | 1.2497 | 1.1283 | 1.3841 | 1.3289 | 1.2177 | 1.2491 | 0.9024 | 1.3265 | 1.0752 | 0.7643 |
| 20.25 | 1.3374 | 1.2637 | 1.1419 | 1.3943 | 1.3379 | 1.2264 | 1.2648 | 0.9139 | 1.3358 | 1.0843 | 0.7747 |
| 20.5  | 1.3474 | 1.2743 | 1.1521 | 1.405  | 1.3464 | 1.238  | 1.2779 | 0.9256 | 1.3445 | 1.091  | 0.788  |
| 20.75 | 1.3589 | 1.2848 | 1.1637 | 1.4128 | 1.3538 | 1.2426 | 1.2913 | 0.9375 | 1.3516 | 1.0982 | 0.7935 |
| 21    | 1.3704 | 1.2956 | 1.1744 | 1.4226 | 1.3621 | 1.2506 | 1.3036 | 0.9499 | 1.3606 | 1.1066 | 0.8024 |
| 21.25 | 1.3806 | 1.3083 | 1.1829 | 1.4303 | 1.3696 | 1.257  | 1.3163 | 0.9618 | 1.3662 | 1.114  | 0.8108 |
| 21.5  | 1.39   | 1.3184 | 1.1906 | 1.4394 | 1.378  | 1.2648 | 1.3285 | 0.9735 | 1.3748 | 1.1208 | 0.8186 |
| 21.75 | 1.3999 | 1.3289 | 1.2037 | 1.4481 | 1.386  | 1.2725 | 1.3396 | 0.9853 | 1.3818 | 1.1276 | 0.8293 |
| 22    | 1.4093 | 1.3395 | 1.2116 | 1.4553 | 1.3939 | 1.2786 | 1.3536 | 0.9976 | 1.3882 | 1.1329 | 0.8351 |
| 22.25 | 1.4189 | 1.3493 | 1.2223 | 1.4635 | 1.4009 | 1.2868 | 1.3634 | 1.0097 | 1.3961 | 1.1378 | 0.8454 |
| 22.5  | 1.4278 | 1.3589 | 1.2316 | 1.471  | 1.4079 | 1.2942 | 1.3769 | 1.0209 | 1.4017 | 1.1441 | 0.854  |

|       |        |        |        |        |        |        |        |        |        |        |        |
|-------|--------|--------|--------|--------|--------|--------|--------|--------|--------|--------|--------|
| 22.75 | 1.4356 | 1.369  | 1.2391 | 1.4787 | 1.4158 | 1.2985 | 1.3866 | 1.0319 | 1.4088 | 1.1503 | 0.8618 |
| 23    | 1.4425 | 1.3781 | 1.2485 | 1.4853 | 1.4221 | 1.3047 | 1.3982 | 1.044  | 1.4148 | 1.1569 | 0.8687 |
| 23.25 | 1.4488 | 1.3861 | 1.257  | 1.4932 | 1.4308 | 1.3096 | 1.4078 | 1.0564 | 1.4222 | 1.161  | 0.8756 |
| 23.5  | 1.4527 | 1.3947 | 1.2667 | 1.5    | 1.4362 | 1.317  | 1.4173 | 1.0681 | 1.4286 | 1.1672 | 0.8797 |
| 23.75 | 1.4559 | 1.4037 | 1.2752 | 1.5059 | 1.4427 | 1.322  | 1.4278 | 1.0788 | 1.4342 | 1.1737 | 0.8889 |
| 24    | 1.4583 | 1.4119 | 1.2845 | 1.5115 | 1.4498 | 1.3266 | 1.4383 | 1.0913 | 1.4405 | 1.1768 | 0.8958 |
| 24.25 | 1.4609 | 1.4188 | 1.2937 | 1.5174 | 1.4559 | 1.3346 | 1.4472 | 1.1027 | 1.4467 | 1.184  | 0.9032 |
| 24.5  | 1.4615 | 1.4276 | 1.3014 | 1.5223 | 1.4606 | 1.3407 | 1.4556 | 1.112  | 1.4527 | 1.1887 | 0.9084 |
| 24.75 | 1.4635 | 1.4341 | 1.3101 | 1.5245 | 1.4677 | 1.3472 | 1.4644 | 1.1237 | 1.4587 | 1.1947 | 0.9154 |
| 25    | 1.466  | 1.4379 | 1.3177 | 1.5289 | 1.4726 | 1.3516 | 1.4711 | 1.1337 | 1.4639 | 1.2009 | 0.9213 |
| 25.25 | 1.4669 | 1.4431 | 1.3269 | 1.5316 | 1.479  | 1.3582 | 1.4786 | 1.1441 | 1.4692 | 1.2058 | 0.9268 |
| 25.5  | 1.4687 | 1.4476 | 1.3358 | 1.5358 | 1.4845 | 1.3645 | 1.4868 | 1.1535 | 1.4754 | 1.2119 | 0.933  |
| 25.75 | 1.4687 | 1.4518 | 1.345  | 1.5382 | 1.49   | 1.3732 | 1.4948 | 1.1675 | 1.4831 | 1.22   | 0.9395 |
| 26    | 1.4682 | 1.453  | 1.3526 | 1.5434 | 1.4955 | 1.3782 | 1.5005 | 1.1778 | 1.4885 | 1.2245 | 0.9428 |
| 26.25 | 1.4704 | 1.4557 | 1.3577 | 1.5449 | 1.5004 | 1.3834 | 1.5059 | 1.1864 | 1.4931 | 1.2316 | 0.9502 |
| 26.5  | 1.4702 | 1.4595 | 1.368  | 1.5454 | 1.5043 | 1.391  | 1.511  | 1.1962 | 1.4993 | 1.2366 | 0.9536 |
| 26.75 | 1.4706 | 1.4619 | 1.3756 | 1.5466 | 1.5063 | 1.3975 | 1.514  | 1.207  | 1.5048 | 1.2444 | 0.9587 |
| 27    | 1.4716 | 1.4639 | 1.3808 | 1.5467 | 1.511  | 1.4033 | 1.5186 | 1.2167 | 1.5099 | 1.2493 | 0.9648 |
| 27.25 | 1.4725 | 1.4677 | 1.3894 | 1.5469 | 1.5158 | 1.4084 | 1.5225 | 1.2272 | 1.5165 | 1.2558 | 0.9692 |
| 27.5  | 1.473  | 1.4709 | 1.396  | 1.5486 | 1.5195 | 1.4164 | 1.5243 | 1.2365 | 1.521  | 1.2616 | 0.9767 |
| 27.75 | 1.4747 | 1.4735 | 1.4025 | 1.5459 | 1.5224 | 1.4216 | 1.5264 | 1.2459 | 1.5259 | 1.2695 | 0.9798 |
| 28    | 1.4747 | 1.4758 | 1.4095 | 1.5475 | 1.5234 | 1.4272 | 1.5273 | 1.2562 | 1.5317 | 1.2756 | 0.9848 |
| 28.25 | 1.4772 | 1.4784 | 1.4156 | 1.5464 | 1.526  | 1.4325 | 1.5299 | 1.2667 | 1.5365 | 1.2828 | 0.9887 |
| 28.5  | 1.4758 | 1.4806 | 1.4201 | 1.5467 | 1.5268 | 1.4382 | 1.5278 | 1.2769 | 1.5426 | 1.2911 | 0.9951 |
| 28.75 | 1.4763 | 1.4813 | 1.4239 | 1.5466 | 1.5282 | 1.4423 | 1.5286 | 1.2858 | 1.5461 | 1.2955 | 1.0005 |
| 29    | 1.4771 | 1.4829 | 1.4289 | 1.5452 | 1.5294 | 1.449  | 1.5284 | 1.2941 | 1.5509 | 1.3024 | 1.0047 |
| 29.25 | 1.4786 | 1.485  | 1.4341 | 1.546  | 1.5285 | 1.4532 | 1.5274 | 1.3035 | 1.5564 | 1.3085 | 1.0091 |
| 29.5  | 1.4803 | 1.4861 | 1.4367 | 1.5455 | 1.5294 | 1.4583 | 1.5271 | 1.3122 | 1.5598 | 1.3152 | 1.017  |
| 29.75 | 1.4807 | 1.4866 | 1.4387 | 1.5447 | 1.5297 | 1.4641 | 1.5269 | 1.3201 | 1.5644 | 1.321  | 1.0208 |
| 30    | 1.4823 | 1.4892 | 1.4412 | 1.545  | 1.5325 | 1.4695 | 1.5259 | 1.3307 | 1.5685 | 1.3275 | 1.0277 |
| 30.25 | 1.4831 | 1.49   | 1.4444 | 1.5467 | 1.5346 | 1.4737 | 1.5286 | 1.3399 | 1.5736 | 1.3354 | 1.0331 |
| 30.5  | 1.4829 | 1.4913 | 1.4444 | 1.5474 | 1.5338 | 1.4785 | 1.5265 | 1.3463 | 1.5766 | 1.3413 | 1.0402 |
| 30.75 | 1.4823 | 1.4923 | 1.4446 | 1.5445 | 1.5346 | 1.4849 | 1.5257 | 1.355  | 1.5801 | 1.3479 | 1.0438 |
| 31    | 1.4825 | 1.4929 | 1.4466 | 1.5461 | 1.5353 | 1.4884 | 1.5255 | 1.3628 | 1.5828 | 1.3554 | 1.0485 |
| 31.25 | 1.4843 | 1.4939 | 1.448  | 1.545  | 1.5361 | 1.4914 | 1.5243 | 1.3701 | 1.5867 | 1.3603 | 1.0561 |
| 31.5  | 1.4842 | 1.496  | 1.4475 | 1.5459 | 1.5365 | 1.4957 | 1.5238 | 1.3784 | 1.5879 | 1.3663 | 1.0614 |
| 31.75 | 1.4837 | 1.4956 | 1.4475 | 1.5455 | 1.5367 | 1.4981 | 1.5239 | 1.3844 | 1.5892 | 1.3726 | 1.0657 |
| 32    | 1.4837 | 1.4964 | 1.4488 | 1.5448 | 1.5358 | 1.4998 | 1.5227 | 1.3916 | 1.59   | 1.3762 | 1.0716 |
| 32.25 | 1.4847 | 1.4969 | 1.4483 | 1.5451 | 1.5359 | 1.5026 | 1.523  | 1.3984 | 1.5903 | 1.3819 | 1.075  |
| 32.5  | 1.4848 | 1.4964 | 1.448  | 1.5437 | 1.5367 | 1.5036 | 1.5221 | 1.4054 | 1.5916 | 1.3898 | 1.0808 |
| 32.75 | 1.4858 | 1.4974 | 1.448  | 1.5443 | 1.5374 | 1.5048 | 1.5233 | 1.4111 | 1.593  | 1.3959 | 1.0876 |
| 33    | 1.4867 | 1.4992 | 1.4467 | 1.5437 | 1.5371 | 1.506  | 1.5225 | 1.4165 | 1.5932 | 1.4001 | 1.0916 |

|       |        |        |        |        |        |        |        |        |        |        |        |
|-------|--------|--------|--------|--------|--------|--------|--------|--------|--------|--------|--------|
| 33.25 | 1.4876 | 1.498  | 1.4476 | 1.5424 | 1.5375 | 1.5065 | 1.5227 | 1.4233 | 1.5932 | 1.4064 | 1.0975 |
| 33.5  | 1.4885 | 1.4993 | 1.4481 | 1.5441 | 1.5387 | 1.5089 | 1.5223 | 1.4292 | 1.5939 | 1.4108 | 1.1044 |
| 33.75 | 1.4883 | 1.4994 | 1.4469 | 1.5433 | 1.5375 | 1.5092 | 1.5205 | 1.4333 | 1.593  | 1.4174 | 1.1106 |
| 34    | 1.4888 | 1.4988 | 1.4474 | 1.5424 | 1.5397 | 1.5093 | 1.5215 | 1.4379 | 1.5927 | 1.4228 | 1.1172 |
| 34.25 | 1.4892 | 1.4995 | 1.4471 | 1.5431 | 1.5386 | 1.5108 | 1.5206 | 1.4421 | 1.5926 | 1.4283 | 1.1227 |
| 34.5  | 1.4899 | 1.4996 | 1.4474 | 1.5433 | 1.5402 | 1.5114 | 1.5195 | 1.4468 | 1.5928 | 1.4334 | 1.1291 |
| 34.75 | 1.4919 | 1.5003 | 1.4472 | 1.5423 | 1.5404 | 1.5118 | 1.5207 | 1.4499 | 1.5938 | 1.4392 | 1.1328 |
| 35    | 1.492  | 1.5014 | 1.4486 | 1.5427 | 1.5416 | 1.5136 | 1.5194 | 1.4531 | 1.5929 | 1.4455 | 1.1405 |
| 35.25 | 1.4922 | 1.502  | 1.4486 | 1.5434 | 1.542  | 1.5144 | 1.5207 | 1.4545 | 1.593  | 1.4512 | 1.146  |
| 35.5  | 1.4933 | 1.5004 | 1.4477 | 1.5435 | 1.5425 | 1.5142 | 1.5193 | 1.4562 | 1.5921 | 1.4563 | 1.1498 |
| 35.75 | 1.4939 | 1.5019 | 1.4479 | 1.5444 | 1.5427 | 1.515  | 1.5203 | 1.4573 | 1.5932 | 1.4598 | 1.1555 |
| 36    | 1.4951 | 1.5018 | 1.4476 | 1.5437 | 1.5428 | 1.5159 | 1.5197 | 1.4572 | 1.5928 | 1.4648 | 1.1621 |
| 36.25 | 1.4965 | 1.5015 | 1.4469 | 1.5421 | 1.5448 | 1.5155 | 1.5198 | 1.4562 | 1.5935 | 1.4706 | 1.1684 |
| 36.5  | 1.4976 | 1.5021 | 1.4473 | 1.5411 | 1.5452 | 1.517  | 1.5199 | 1.4569 | 1.5939 | 1.4737 | 1.173  |
| 36.75 | 1.4983 | 1.5037 | 1.4481 | 1.5473 | 1.5496 | 1.5226 | 1.5233 | 1.4573 | 1.5956 | 1.4811 | 1.1823 |
| 37    | 1.4992 | 1.5034 | 1.4477 | 1.5453 | 1.5473 | 1.5199 | 1.5208 | 1.4545 | 1.5942 | 1.4833 | 1.1846 |
| 37.25 | 1.4997 | 1.504  | 1.449  | 1.5437 | 1.5482 | 1.5206 | 1.5205 | 1.4543 | 1.5951 | 1.4881 | 1.1896 |
| 37.5  | 1.5011 | 1.5037 | 1.4489 | 1.5434 | 1.5465 | 1.5209 | 1.5204 | 1.4535 | 1.5945 | 1.4918 | 1.1961 |
| 37.75 | 1.502  | 1.505  | 1.4486 | 1.5442 | 1.5468 | 1.5213 | 1.5197 | 1.4518 | 1.5948 | 1.4952 | 1.202  |
| 38    | 1.5029 | 1.5047 | 1.4475 | 1.5446 | 1.5484 | 1.5239 | 1.5189 | 1.4517 | 1.5945 | 1.4986 | 1.2073 |
| 38.25 | 1.5029 | 1.5046 | 1.449  | 1.543  | 1.5477 | 1.5231 | 1.5194 | 1.4496 | 1.5943 | 1.5012 | 1.2114 |
| 38.5  | 1.504  | 1.505  | 1.4481 | 1.5429 | 1.5491 | 1.5226 | 1.5189 | 1.4489 | 1.594  | 1.5037 | 1.2164 |
| 38.75 | 1.5035 | 1.5042 | 1.448  | 1.5427 | 1.5477 | 1.5233 | 1.5197 | 1.4471 | 1.5933 | 1.5055 | 1.2218 |
| 39    | 1.5042 | 1.505  | 1.4488 | 1.5425 | 1.5479 | 1.5231 | 1.5185 | 1.4462 | 1.5931 | 1.5053 | 1.227  |
| 39.25 | 1.5058 | 1.5049 | 1.4482 | 1.5435 | 1.5479 | 1.5234 | 1.5192 | 1.4458 | 1.5925 | 1.5073 | 1.2323 |
| 39.5  | 1.507  | 1.5052 | 1.4485 | 1.5426 | 1.5485 | 1.5252 | 1.5182 | 1.4454 | 1.5928 | 1.51   | 1.2364 |
| 39.75 | 1.5073 | 1.506  | 1.4484 | 1.5432 | 1.5477 | 1.5241 | 1.5192 | 1.4434 | 1.5922 | 1.5107 | 1.2418 |
| 40    | 1.5077 | 1.5062 | 1.4489 | 1.5431 | 1.5489 | 1.5254 | 1.5183 | 1.4434 | 1.593  | 1.5112 | 1.2476 |
| 40.25 | 1.5093 | 1.5063 | 1.4496 | 1.5437 | 1.5491 | 1.5258 | 1.5193 | 1.443  | 1.5934 | 1.5133 | 1.2522 |
| 40.5  | 1.5096 | 1.506  | 1.4489 | 1.5437 | 1.5493 | 1.5277 | 1.519  | 1.4427 | 1.5932 | 1.5126 | 1.2577 |
| 40.75 | 1.5108 | 1.5059 | 1.4494 | 1.5426 | 1.5485 | 1.5263 | 1.5185 | 1.4426 | 1.5923 | 1.5123 | 1.2631 |
| 41    | 1.5129 | 1.5053 | 1.4485 | 1.5444 | 1.5487 | 1.527  | 1.5172 | 1.4416 | 1.5919 | 1.5138 | 1.2681 |
| 41.25 | 1.5127 | 1.5048 | 1.4491 | 1.5428 | 1.5494 | 1.5266 | 1.5174 | 1.4416 | 1.5916 | 1.5135 | 1.2705 |
| 41.5  | 1.513  | 1.5052 | 1.4495 | 1.5431 | 1.5485 | 1.5277 | 1.5168 | 1.4414 | 1.5919 | 1.5129 | 1.2765 |
| 41.75 | 1.513  | 1.5045 | 1.4496 | 1.5437 | 1.5499 | 1.5265 | 1.517  | 1.4409 | 1.5912 | 1.5126 | 1.2798 |
| 42    | 1.5143 | 1.506  | 1.4492 | 1.5421 | 1.5489 | 1.5276 | 1.5174 | 1.4411 | 1.5914 | 1.5141 | 1.2865 |
| 42.25 | 1.5164 | 1.506  | 1.4512 | 1.5433 | 1.5502 | 1.5274 | 1.5187 | 1.4416 | 1.592  | 1.5145 | 1.291  |
| 42.5  | 1.5166 | 1.5062 | 1.4516 | 1.5417 | 1.5511 | 1.5282 | 1.5182 | 1.4414 | 1.5923 | 1.515  | 1.2968 |
| 42.75 | 1.518  | 1.506  | 1.4518 | 1.5426 | 1.55   | 1.5276 | 1.518  | 1.4419 | 1.5923 | 1.5141 | 1.302  |
| 43    | 1.5154 | 1.5053 | 1.4522 | 1.5438 | 1.5518 | 1.5288 | 1.519  | 1.4417 | 1.5928 | 1.5143 | 1.3066 |
| 43.25 | 1.5129 | 1.5059 | 1.4522 | 1.5425 | 1.5516 | 1.5281 | 1.5191 | 1.4412 | 1.5926 | 1.5145 | 1.3133 |
| 43.5  | 1.5111 | 1.5064 | 1.4527 | 1.5425 | 1.5505 | 1.5289 | 1.5192 | 1.4409 | 1.5925 | 1.5137 | 1.3155 |

|       |        |        |        |        |        |        |        |        |        |        |        |
|-------|--------|--------|--------|--------|--------|--------|--------|--------|--------|--------|--------|
| 43.75 | 1.5114 | 1.5084 | 1.453  | 1.5445 | 1.5523 | 1.5308 | 1.5201 | 1.4415 | 1.5929 | 1.5151 | 1.3204 |
| 44    | 1.5125 | 1.5078 | 1.4529 | 1.544  | 1.5523 | 1.53   | 1.5212 | 1.4421 | 1.5925 | 1.5144 | 1.3248 |
| 44.25 | 1.5102 | 1.5073 | 1.4529 | 1.5446 | 1.5529 | 1.5312 | 1.5199 | 1.4427 | 1.5924 | 1.5152 | 1.3299 |
| 44.5  | 1.5105 | 1.5065 | 1.4523 | 1.544  | 1.5515 | 1.5316 | 1.5209 | 1.4438 | 1.5932 | 1.5144 | 1.3345 |
| 44.75 | 1.5104 | 1.5065 | 1.454  | 1.5441 | 1.5531 | 1.5313 | 1.5213 | 1.444  | 1.5921 | 1.5134 | 1.3386 |
| 45    | 1.5092 | 1.5064 | 1.4543 | 1.544  | 1.5515 | 1.5311 | 1.5212 | 1.4435 | 1.5916 | 1.5139 | 1.3445 |
| 45.25 | 1.5105 | 1.5057 | 1.4541 | 1.5435 | 1.5522 | 1.5323 | 1.5214 | 1.4434 | 1.5916 | 1.5138 | 1.3473 |
| 45.5  | 1.5103 | 1.5065 | 1.4557 | 1.5438 | 1.5528 | 1.5324 | 1.5215 | 1.4444 | 1.5921 | 1.5141 | 1.3525 |
| 45.75 | 1.51   | 1.5067 | 1.4559 | 1.5446 | 1.5534 | 1.5321 | 1.5215 | 1.4448 | 1.5917 | 1.5137 | 1.3564 |
| 46    | 1.5108 | 1.5061 | 1.4561 | 1.5438 | 1.5534 | 1.5315 | 1.5221 | 1.4465 | 1.591  | 1.5157 | 1.3616 |
| 46.25 | 1.5109 | 1.5064 | 1.456  | 1.5445 | 1.5535 | 1.5313 | 1.5224 | 1.4466 | 1.5921 | 1.5155 | 1.3661 |
| 46.5  | 1.511  | 1.5069 | 1.4571 | 1.5448 | 1.5544 | 1.5325 | 1.5228 | 1.4472 | 1.5929 | 1.5157 | 1.3684 |
| 46.75 | 1.511  | 1.5052 | 1.4577 | 1.5445 | 1.5531 | 1.5322 | 1.5232 | 1.4478 | 1.5922 | 1.5143 | 1.3727 |
| 47    | 1.5111 | 1.5059 | 1.4574 | 1.5454 | 1.5538 | 1.5323 | 1.5238 | 1.4492 | 1.5919 | 1.516  | 1.3784 |
| 47.25 | 1.5102 | 1.5042 | 1.4571 | 1.5447 | 1.5534 | 1.5337 | 1.5244 | 1.4484 | 1.592  | 1.514  | 1.3822 |
| 47.5  | 1.5112 | 1.5044 | 1.4583 | 1.5454 | 1.5534 | 1.5342 | 1.5228 | 1.4498 | 1.5913 | 1.5159 | 1.3871 |
| 47.75 | 1.5109 | 1.5036 | 1.4575 | 1.5452 | 1.5527 | 1.5335 | 1.5229 | 1.4505 | 1.5918 | 1.5148 | 1.3896 |
| 48    | 1.511  | 1.5046 | 1.4582 | 1.5447 | 1.554  | 1.5334 | 1.5232 | 1.4508 | 1.5915 | 1.5144 | 1.3949 |
| 48.25 | 1.511  | 1.5042 | 1.4587 | 1.5454 | 1.553  | 1.5338 | 1.5231 | 1.4523 | 1.5906 | 1.5146 | 1.3984 |
| 48.5  | 1.5111 | 1.504  | 1.4592 | 1.545  | 1.5527 | 1.5335 | 1.5228 | 1.4521 | 1.5903 | 1.5149 | 1.4    |
| 48.75 | 1.5107 | 1.5019 | 1.4578 | 1.545  | 1.5532 | 1.5336 | 1.5219 | 1.4533 | 1.5897 | 1.5148 | 1.4048 |
| 49    | 1.5112 | 1.5026 | 1.4586 | 1.5449 | 1.5535 | 1.5339 | 1.5239 | 1.4541 | 1.591  | 1.5153 | 1.4086 |
| 49.25 | 1.5109 | 1.5034 | 1.4604 | 1.5456 | 1.5539 | 1.5343 | 1.5234 | 1.4547 | 1.59   | 1.5139 | 1.4126 |
| 49.5  | 1.5094 | 1.504  | 1.4603 | 1.5452 | 1.554  | 1.5353 | 1.5236 | 1.4546 | 1.5888 | 1.5144 | 1.4163 |
| 49.75 | 1.5105 | 1.5038 | 1.4602 | 1.546  | 1.5544 | 1.5355 | 1.5243 | 1.4564 | 1.59   | 1.5146 | 1.4211 |





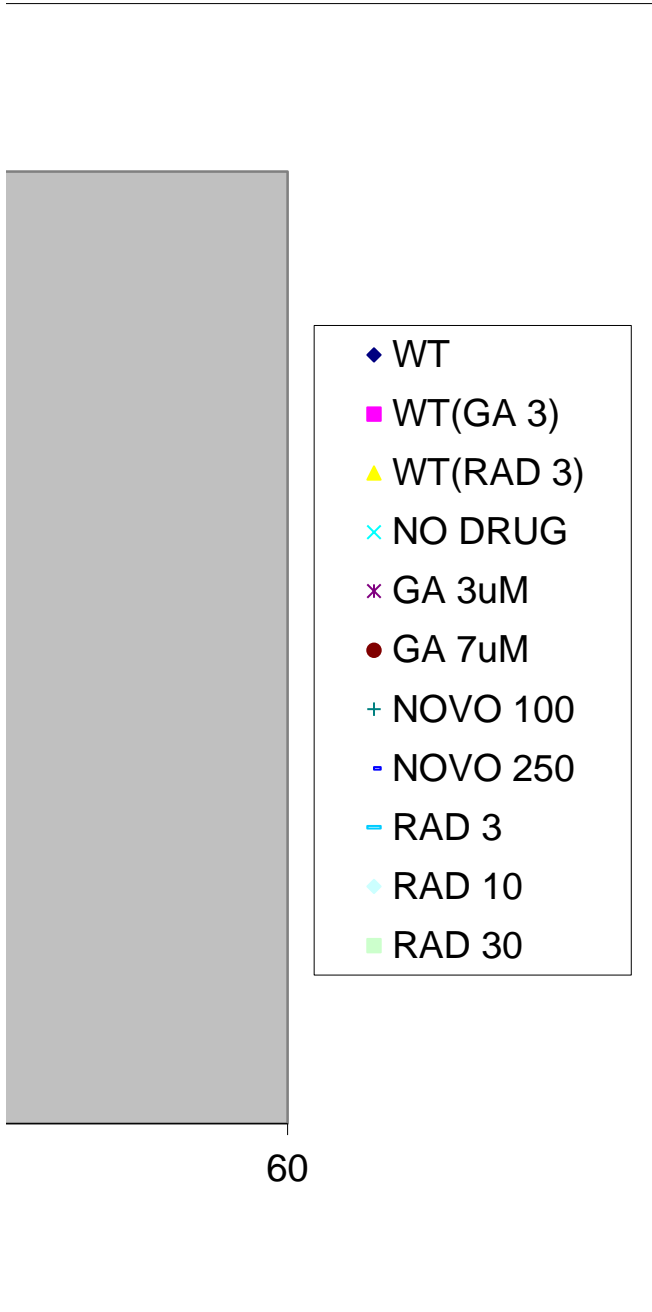

|             |           | J9              | J10              | J11            | J12           | J13           | J14             | J15             | J16          |               |               |
|-------------|-----------|-----------------|------------------|----------------|---------------|---------------|-----------------|-----------------|--------------|---------------|---------------|
| <b>TIME</b> | <b>WT</b> | <b>WT(GA 3)</b> | <b>WT(RAD 3)</b> | <b>NO DRUG</b> | <b>GA 3uM</b> | <b>GA 7uM</b> | <b>NOVO 100</b> | <b>NOVO 250</b> | <b>RAD 3</b> | <b>RAD 10</b> | <b>RAD 30</b> |
| 0           | 0.1894    | 0.2051          | 0.1892           | 0.1719         | 0.1733        | 0.1784        | 0.212           | 0.3479          | 0.1607       | 0.1812        | 0.1756        |
| 0.25        | 0.1844    | 0.1929          | 0.1812           | 0.1645         | 0.1644        | 0.1725        | 0.2179          | 0.3385          | 0.1537       | 0.1737        | 0.17          |
| 0.5         | 0.1833    | 0.1912          | 0.1787           | 0.1617         | 0.1613        | 0.1675        | 0.2209          | 0.3285          | 0.1501       | 0.1716        | 0.1679        |
| 0.75        | 0.1838    | 0.189           | 0.1758           | 0.161          | 0.1622        | 0.1672        | 0.221           | 0.3191          | 0.1508       | 0.1716        | 0.1682        |
| 1           | 0.1843    | 0.1877          | 0.1818           | 0.1603         | 0.1615        | 0.1666        | 0.2216          | 0.3132          | 0.1504       | 0.1706        | 0.1669        |
| 1.25        | 0.1867    | 0.1862          | 0.1836           | 0.1607         | 0.1622        | 0.1684        | 0.2227          | 0.3041          | 0.1507       | 0.1718        | 0.1678        |
| 1.5         | 0.188     | 0.186           | 0.1823           | 0.1608         | 0.163         | 0.1692        | 0.222           | 0.2959          | 0.1522       | 0.1733        | 0.1692        |
| 1.75        | 0.1903    | 0.1872          | 0.1822           | 0.1632         | 0.1639        | 0.1706        | 0.2202          | 0.2874          | 0.1528       | 0.1743        | 0.1702        |
| 2           | 0.192     | 0.1886          | 0.1825           | 0.1646         | 0.1664        | 0.1723        | 0.22            | 0.2807          | 0.1544       | 0.1751        | 0.1707        |

PHO86

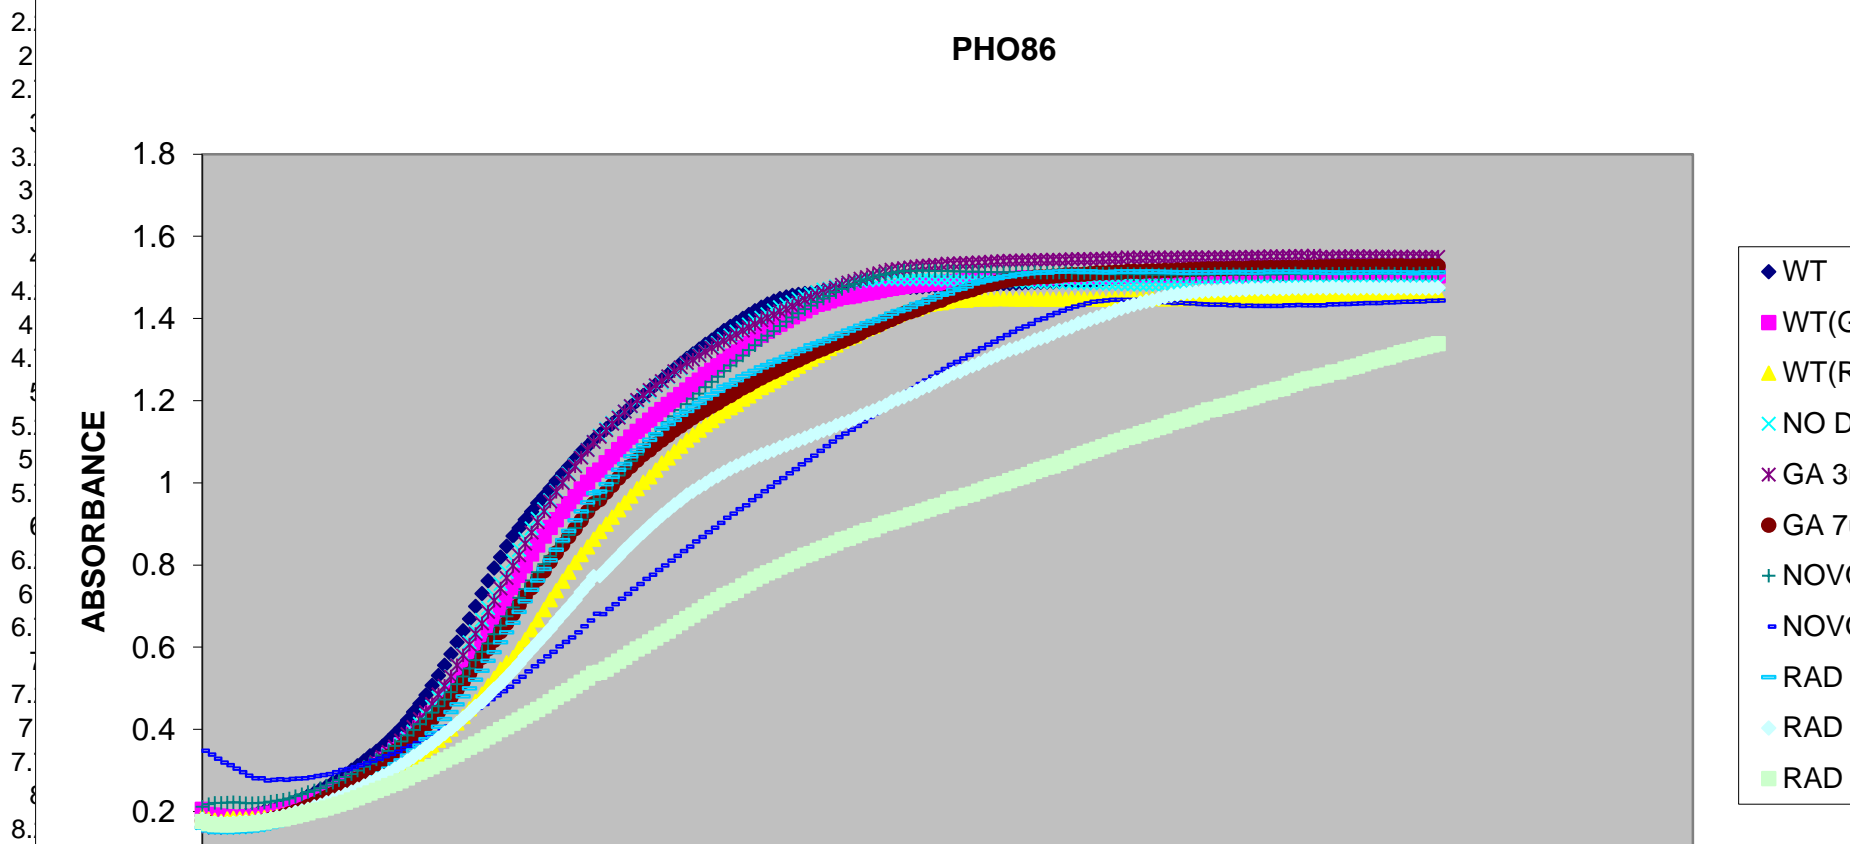

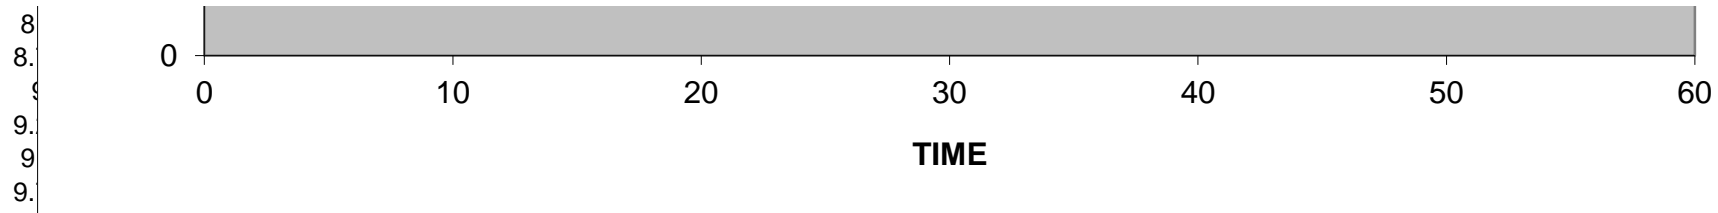

| TIME  | 0      | 10     | 20     | 30     | 40     | 50     | 60     |
|-------|--------|--------|--------|--------|--------|--------|--------|
| 8     | 0.5829 | 0.4986 | 0.4011 | 0.5292 | 0.5286 | 0.4779 | 0.4907 |
| 8.    | 0.6122 | 0.5197 | 0.416  | 0.5557 | 0.556  | 0.4969 | 0.5097 |
| 9.    | 0.6397 | 0.5418 | 0.4316 | 0.582  | 0.5804 | 0.5157 | 0.5284 |
| 9.    | 0.6685 | 0.5593 | 0.4497 | 0.6122 | 0.6067 | 0.5351 | 0.5485 |
| 10    | 0.6992 | 0.5825 | 0.4678 | 0.6382 | 0.6326 | 0.5546 | 0.5685 |
| 10.25 | 0.7307 | 0.6075 | 0.4857 | 0.6662 | 0.6576 | 0.5753 | 0.589  |
| 10.5  | 0.7614 | 0.6339 | 0.5059 | 0.6956 | 0.6861 | 0.596  | 0.6089 |
| 10.75 | 0.7927 | 0.6618 | 0.5242 | 0.7258 | 0.7133 | 0.6163 | 0.6316 |
| 11    | 0.8194 | 0.6889 | 0.5464 | 0.7537 | 0.7425 | 0.6377 | 0.6527 |
| 11.25 | 0.8459 | 0.7168 | 0.5622 | 0.7832 | 0.7688 | 0.658  | 0.6748 |
| 11.5  | 0.8706 | 0.7448 | 0.5743 | 0.8095 | 0.7982 | 0.6804 | 0.6969 |
| 11.75 | 0.8904 | 0.7744 | 0.5968 | 0.8369 | 0.8236 | 0.702  | 0.7199 |
| 12    | 0.9099 | 0.7982 | 0.6186 | 0.8639 | 0.8517 | 0.7236 | 0.741  |
| 12.25 | 0.9301 | 0.8269 | 0.6426 | 0.8896 | 0.8788 | 0.7446 | 0.7623 |
| 12.5  | 0.9508 | 0.849  | 0.6665 | 0.9126 | 0.9044 | 0.7657 | 0.7828 |
| 12.75 | 0.9679 | 0.8707 | 0.6913 | 0.9362 | 0.9305 | 0.786  | 0.8017 |
| 13    | 0.986  | 0.8918 | 0.7152 | 0.9577 | 0.9549 | 0.8079 | 0.8215 |
| 13.25 | 1.0047 | 0.9106 | 0.7372 | 0.9804 | 0.9784 | 0.8293 | 0.8398 |
| 13.5  | 1.0233 | 0.9308 | 0.7608 | 1.0025 | 0.9996 | 0.8495 | 0.8553 |
| 13.75 | 1.0397 | 0.9491 | 0.7825 | 1.0222 | 1.0204 | 0.8687 | 0.873  |
| 14    | 1.0577 | 0.966  | 0.8057 | 1.0425 | 1.0406 | 0.8883 | 0.8902 |
| 14.25 | 1.0753 | 0.9853 | 0.8251 | 1.0632 | 1.0611 | 0.9087 | 0.9106 |
| 14.5  | 1.0897 | 1.0015 | 0.8439 | 1.0809 | 1.0799 | 0.9298 | 0.9295 |
| 14.75 | 1.1049 | 1.0198 | 0.8628 | 1.0997 | 1.0999 | 0.9496 | 0.9575 |
| 15    | 1.1171 | 1.031  | 0.8817 | 1.1153 | 1.112  | 0.9593 | 0.9609 |
| 15.25 | 1.1316 | 1.0487 | 0.8996 | 1.1312 | 1.1287 | 0.9771 | 0.9801 |
| 15.5  | 1.1443 | 1.0637 | 0.9165 | 1.1463 | 1.1438 | 0.9939 | 0.999  |
| 15.75 | 1.1579 | 1.0806 | 0.9342 | 1.1608 | 1.1584 | 1.0115 | 1.0175 |
| 16    | 1.1715 | 1.0952 | 0.9517 | 1.1733 | 1.1734 | 1.0265 | 1.034  |
| 16.25 | 1.1858 | 1.1114 | 0.9682 | 1.1859 | 1.1864 | 1.0407 | 1.0528 |
| 16.5  | 1.2004 | 1.1256 | 0.9855 | 1.1987 | 1.2016 | 1.0555 | 1.0685 |
| 16.75 | 1.2123 | 1.1388 | 1.0016 | 1.2102 | 1.2136 | 1.0692 | 1.0865 |
| 17    | 1.2261 | 1.1522 | 1.015  | 1.2215 | 1.2255 | 1.0804 | 1.1012 |
| 17.25 | 1.239  | 1.1664 | 1.0307 | 1.2356 | 1.2371 | 1.0934 | 1.1191 |
| 17.5  | 1.251  | 1.1779 | 1.0478 | 1.2446 | 1.2479 | 1.1045 | 1.1324 |
| 17.75 | 1.2641 | 1.1907 | 1.0607 | 1.258  | 1.2591 | 1.116  | 1.1477 |
| 18    |        |        |        |        |        |        |        |
| 18.25 |        |        |        |        |        |        |        |
| 18.5  |        |        |        |        |        |        |        |
| 18.75 |        |        |        |        |        |        |        |

|       |        |        |        |        |        |        |        |        |        |        |        |
|-------|--------|--------|--------|--------|--------|--------|--------|--------|--------|--------|--------|
| 19    | 1.2773 | 1.2018 | 1.0765 | 1.2696 | 1.2718 | 1.128  | 1.162  | 0.8222 | 1.1533 | 0.9465 | 0.65   |
| 19.25 | 1.2907 | 1.2145 | 1.0891 | 1.2789 | 1.2811 | 1.1382 | 1.1778 | 0.834  | 1.1657 | 0.958  | 0.6595 |
| 19.5  | 1.3032 | 1.2259 | 1.1041 | 1.2896 | 1.2918 | 1.1488 | 1.1918 | 0.845  | 1.1753 | 0.9702 | 0.6699 |
| 19.75 | 1.3141 | 1.239  | 1.1166 | 1.3002 | 1.3001 | 1.1586 | 1.2046 | 0.8574 | 1.1848 | 0.9797 | 0.6778 |
| 20    | 1.3251 | 1.2497 | 1.1283 | 1.3113 | 1.3095 | 1.1686 | 1.2172 | 0.8683 | 1.1942 | 0.99   | 0.6884 |
| 20.25 | 1.3374 | 1.2637 | 1.1419 | 1.3201 | 1.3189 | 1.1772 | 1.2325 | 0.8798 | 1.2057 | 0.9985 | 0.6984 |
| 20.5  | 1.3474 | 1.2743 | 1.1521 | 1.3307 | 1.3285 | 1.1864 | 1.2456 | 0.891  | 1.2146 | 1.0092 | 0.7072 |
| 20.75 | 1.3589 | 1.2848 | 1.1637 | 1.3403 | 1.3369 | 1.1949 | 1.2585 | 0.9024 | 1.2241 | 1.0169 | 0.7155 |
| 21    | 1.3704 | 1.2956 | 1.1744 | 1.3505 | 1.3453 | 1.2045 | 1.2721 | 0.9147 | 1.2346 | 1.0255 | 0.7255 |
| 21.25 | 1.3806 | 1.3083 | 1.1829 | 1.3587 | 1.3538 | 1.2128 | 1.2854 | 0.925  | 1.2392 | 1.0343 | 0.7311 |
| 21.5  | 1.39   | 1.3184 | 1.1906 | 1.368  | 1.361  | 1.2218 | 1.2974 | 0.9361 | 1.2501 | 1.0415 | 0.7383 |
| 21.75 | 1.3999 | 1.3289 | 1.2037 | 1.3769 | 1.3706 | 1.2311 | 1.3099 | 0.9455 | 1.259  | 1.048  | 0.7487 |
| 22    | 1.4093 | 1.3395 | 1.2116 | 1.385  | 1.3783 | 1.2383 | 1.3227 | 0.9578 | 1.2656 | 1.0553 | 0.7561 |
| 22.25 | 1.4189 | 1.3493 | 1.2223 | 1.3945 | 1.3864 | 1.2472 | 1.3345 | 0.9683 | 1.2727 | 1.0623 | 0.7657 |
| 22.5  | 1.4278 | 1.3589 | 1.2316 | 1.4019 | 1.3952 | 1.2551 | 1.3474 | 0.9797 | 1.2809 | 1.0682 | 0.7733 |
| 22.75 | 1.4356 | 1.369  | 1.2391 | 1.4106 | 1.4019 | 1.2629 | 1.3581 | 0.9902 | 1.2865 | 1.0742 | 0.7811 |
| 23    | 1.4425 | 1.3781 | 1.2485 | 1.4194 | 1.4085 | 1.2698 | 1.3693 | 1.0018 | 1.2952 | 1.079  | 0.7865 |
| 23.25 | 1.4488 | 1.3861 | 1.257  | 1.4273 | 1.4177 | 1.2772 | 1.3816 | 1.0116 | 1.2995 | 1.0862 | 0.7954 |
| 23.5  | 1.4527 | 1.3947 | 1.2667 | 1.4338 | 1.423  | 1.2858 | 1.3924 | 1.023  | 1.3064 | 1.092  | 0.8009 |
| 23.75 | 1.4559 | 1.4037 | 1.2752 | 1.4399 | 1.4299 | 1.2926 | 1.4025 | 1.0336 | 1.3134 | 1.0978 | 0.8096 |
| 24    | 1.4583 | 1.4119 | 1.2845 | 1.4474 | 1.4384 | 1.2992 | 1.4123 | 1.0452 | 1.3208 | 1.1036 | 0.815  |
| 24.25 | 1.4609 | 1.4188 | 1.2937 | 1.4532 | 1.4454 | 1.3064 | 1.4227 | 1.0551 | 1.3255 | 1.1086 | 0.8236 |
| 24.5  | 1.4615 | 1.4276 | 1.3014 | 1.4595 | 1.451  | 1.3134 | 1.4316 | 1.0657 | 1.3345 | 1.1153 | 0.8279 |
| 24.75 | 1.4635 | 1.4341 | 1.3101 | 1.464  | 1.4573 | 1.3204 | 1.4398 | 1.0777 | 1.3393 | 1.1215 | 0.8359 |
| 25    | 1.466  | 1.4379 | 1.3177 | 1.4699 | 1.4634 | 1.326  | 1.4484 | 1.0896 | 1.3452 | 1.1273 | 0.8407 |
| 25.25 | 1.4669 | 1.4431 | 1.3269 | 1.4727 | 1.4701 | 1.333  | 1.4549 | 1.1003 | 1.3505 | 1.1316 | 0.8475 |
| 25.5  | 1.4687 | 1.4476 | 1.3358 | 1.4783 | 1.4753 | 1.3396 | 1.4641 | 1.1113 | 1.3576 | 1.1389 | 0.8538 |
| 25.75 | 1.4687 | 1.4518 | 1.345  | 1.4808 | 1.4816 | 1.345  | 1.4721 | 1.1195 | 1.3638 | 1.1447 | 0.8621 |
| 26    | 1.4682 | 1.453  | 1.3526 | 1.4856 | 1.4875 | 1.3514 | 1.4792 | 1.1294 | 1.3703 | 1.1495 | 0.8655 |
| 26.25 | 1.4704 | 1.4557 | 1.3577 | 1.4886 | 1.4914 | 1.3571 | 1.4842 | 1.1384 | 1.3757 | 1.156  | 0.8716 |
| 26.5  | 1.4702 | 1.4595 | 1.368  | 1.4912 | 1.497  | 1.3645 | 1.4902 | 1.1493 | 1.3822 | 1.1636 | 0.8779 |
| 26.75 | 1.4706 | 1.4619 | 1.3756 | 1.4929 | 1.5004 | 1.3729 | 1.4952 | 1.1603 | 1.3885 | 1.17   | 0.8836 |
| 27    | 1.4716 | 1.4639 | 1.3808 | 1.4941 | 1.5061 | 1.378  | 1.5002 | 1.1697 | 1.3936 | 1.1753 | 0.8865 |
| 27.25 | 1.4725 | 1.4677 | 1.3894 | 1.4945 | 1.5097 | 1.3846 | 1.5052 | 1.1806 | 1.3989 | 1.1821 | 0.8958 |
| 27.5  | 1.473  | 1.4709 | 1.396  | 1.4975 | 1.5145 | 1.3925 | 1.5079 | 1.1908 | 1.4045 | 1.188  | 0.9017 |
| 27.75 | 1.4747 | 1.4735 | 1.4025 | 1.4952 | 1.5186 | 1.398  | 1.5108 | 1.2003 | 1.4121 | 1.1975 | 0.9051 |
| 28    | 1.4747 | 1.4758 | 1.4095 | 1.4962 | 1.52   | 1.4052 | 1.5136 | 1.2102 | 1.418  | 1.2037 | 0.9104 |
| 28.25 | 1.4772 | 1.4784 | 1.4156 | 1.4955 | 1.5227 | 1.4115 | 1.5159 | 1.2213 | 1.422  | 1.2094 | 0.9139 |
| 28.5  | 1.4758 | 1.4806 | 1.4201 | 1.4955 | 1.5243 | 1.4164 | 1.5155 | 1.2302 | 1.4283 | 1.2161 | 0.9222 |
| 28.75 | 1.4763 | 1.4813 | 1.4239 | 1.4968 | 1.5266 | 1.4212 | 1.5161 | 1.2404 | 1.4354 | 1.2227 | 0.9249 |
| 29    | 1.4771 | 1.4829 | 1.4289 | 1.4961 | 1.5282 | 1.4275 | 1.5171 | 1.2494 | 1.4394 | 1.2315 | 0.9311 |
| 29.25 | 1.4786 | 1.485  | 1.4341 | 1.4962 | 1.5288 | 1.4334 | 1.5161 | 1.2584 | 1.4459 | 1.2368 | 0.9363 |

|       |        |        |        |        |        |        |        |        |        |        |        |
|-------|--------|--------|--------|--------|--------|--------|--------|--------|--------|--------|--------|
| 29.5  | 1.4803 | 1.4861 | 1.4367 | 1.4948 | 1.5305 | 1.4406 | 1.5158 | 1.2677 | 1.4518 | 1.2451 | 0.9419 |
| 29.75 | 1.4807 | 1.4866 | 1.4387 | 1.4943 | 1.5302 | 1.4443 | 1.5153 | 1.2768 | 1.4576 | 1.2507 | 0.9457 |
| 30    | 1.4823 | 1.4892 | 1.4412 | 1.4937 | 1.5333 | 1.4521 | 1.5159 | 1.2876 | 1.4613 | 1.2589 | 0.9536 |
| 30.25 | 1.4831 | 1.49   | 1.4444 | 1.4941 | 1.5334 | 1.4571 | 1.5144 | 1.2946 | 1.4692 | 1.2669 | 0.9606 |
| 30.5  | 1.4829 | 1.4913 | 1.4444 | 1.4932 | 1.5342 | 1.4622 | 1.5144 | 1.3026 | 1.4725 | 1.271  | 0.9625 |
| 30.75 | 1.4823 | 1.4923 | 1.4446 | 1.4924 | 1.5347 | 1.4661 | 1.5138 | 1.3116 | 1.4784 | 1.2788 | 0.9693 |
| 31    | 1.4825 | 1.4929 | 1.4466 | 1.4917 | 1.5349 | 1.4705 | 1.5137 | 1.3202 | 1.4849 | 1.2853 | 0.9723 |
| 31.25 | 1.4843 | 1.4939 | 1.448  | 1.4917 | 1.5366 | 1.4755 | 1.514  | 1.3275 | 1.4883 | 1.2906 | 0.9796 |
| 31.5  | 1.4842 | 1.496  | 1.4475 | 1.4926 | 1.5368 | 1.4813 | 1.5131 | 1.3364 | 1.4918 | 1.2984 | 0.9849 |
| 31.75 | 1.4837 | 1.4956 | 1.4475 | 1.492  | 1.5379 | 1.4838 | 1.5132 | 1.3433 | 1.4954 | 1.3046 | 0.9903 |
| 32    | 1.4837 | 1.4964 | 1.4488 | 1.4914 | 1.5386 | 1.4884 | 1.5123 | 1.3521 | 1.4987 | 1.3108 | 0.9954 |
| 32.25 | 1.4847 | 1.4969 | 1.4483 | 1.4916 | 1.5395 | 1.4913 | 1.5123 | 1.3595 | 1.5012 | 1.3177 | 0.9981 |
| 32.5  | 1.4848 | 1.4964 | 1.448  | 1.4916 | 1.5406 | 1.4938 | 1.5126 | 1.3673 | 1.5032 | 1.3241 | 1.0053 |
| 32.75 | 1.4858 | 1.4974 | 1.448  | 1.4903 | 1.5401 | 1.4966 | 1.5121 | 1.3753 | 1.5063 | 1.3277 | 1.0106 |
| 33    | 1.4867 | 1.4992 | 1.4467 | 1.4909 | 1.5411 | 1.4973 | 1.5122 | 1.3807 | 1.5074 | 1.3333 | 1.0149 |
| 33.25 | 1.4876 | 1.498  | 1.4476 | 1.4889 | 1.5409 | 1.498  | 1.5126 | 1.387  | 1.51   | 1.3401 | 1.0201 |
| 33.5  | 1.4885 | 1.4993 | 1.4481 | 1.4893 | 1.5415 | 1.5006 | 1.513  | 1.3962 | 1.5105 | 1.347  | 1.0276 |
| 33.75 | 1.4883 | 1.4994 | 1.4469 | 1.4888 | 1.5424 | 1.5017 | 1.5119 | 1.4004 | 1.5127 | 1.3519 | 1.0325 |
| 34    | 1.4888 | 1.4988 | 1.4474 | 1.4897 | 1.5416 | 1.5017 | 1.5113 | 1.4083 | 1.5118 | 1.3567 | 1.0383 |
| 34.25 | 1.4892 | 1.4995 | 1.4471 | 1.4891 | 1.5429 | 1.5032 | 1.5113 | 1.4138 | 1.514  | 1.3632 | 1.0415 |
| 34.5  | 1.4899 | 1.4996 | 1.4474 | 1.4879 | 1.5427 | 1.5039 | 1.5114 | 1.4189 | 1.5142 | 1.3705 | 1.0474 |
| 34.75 | 1.4919 | 1.5003 | 1.4472 | 1.4879 | 1.5426 | 1.5058 | 1.512  | 1.4243 | 1.5151 | 1.3748 | 1.0523 |
| 35    | 1.492  | 1.5014 | 1.4486 | 1.4865 | 1.5444 | 1.5067 | 1.5107 | 1.429  | 1.5146 | 1.3798 | 1.0604 |
| 35.25 | 1.4922 | 1.502  | 1.4486 | 1.4862 | 1.5441 | 1.5067 | 1.5096 | 1.4329 | 1.5152 | 1.3877 | 1.0662 |
| 35.5  | 1.4933 | 1.5004 | 1.4477 | 1.4862 | 1.5443 | 1.5076 | 1.511  | 1.4365 | 1.5133 | 1.3916 | 1.0714 |
| 35.75 | 1.4939 | 1.5019 | 1.4479 | 1.4876 | 1.5444 | 1.5089 | 1.5104 | 1.4405 | 1.5148 | 1.3975 | 1.0767 |
| 36    | 1.4951 | 1.5018 | 1.4476 | 1.4856 | 1.5448 | 1.511  | 1.5094 | 1.4421 | 1.5129 | 1.4029 | 1.0818 |
| 36.25 | 1.4965 | 1.5015 | 1.4469 | 1.4855 | 1.5452 | 1.5109 | 1.5094 | 1.4436 | 1.5134 | 1.4081 | 1.088  |
| 36.5  | 1.4976 | 1.5021 | 1.4473 | 1.485  | 1.5467 | 1.5118 | 1.5095 | 1.4456 | 1.5126 | 1.4123 | 1.0922 |
| 36.75 | 1.4983 | 1.5037 | 1.4481 | 1.4841 | 1.5461 | 1.5123 | 1.508  | 1.4452 | 1.5142 | 1.4198 | 1.0999 |
| 37    | 1.4992 | 1.5034 | 1.4477 | 1.485  | 1.5451 | 1.5126 | 1.5083 | 1.4456 | 1.5147 | 1.4245 | 1.1036 |
| 37.25 | 1.4997 | 1.504  | 1.449  | 1.4836 | 1.5489 | 1.5143 | 1.5091 | 1.4453 | 1.5142 | 1.4288 | 1.1101 |
| 37.5  | 1.5011 | 1.5037 | 1.4489 | 1.4837 | 1.5464 | 1.5147 | 1.5074 | 1.4451 | 1.5149 | 1.4339 | 1.1133 |
| 37.75 | 1.502  | 1.505  | 1.4486 | 1.4824 | 1.547  | 1.514  | 1.5086 | 1.4441 | 1.5134 | 1.4373 | 1.1195 |
| 38    | 1.5029 | 1.5047 | 1.4475 | 1.4828 | 1.5486 | 1.5156 | 1.5074 | 1.4423 | 1.5146 | 1.4412 | 1.1246 |
| 38.25 | 1.5029 | 1.5046 | 1.449  | 1.483  | 1.5468 | 1.5158 | 1.5075 | 1.4411 | 1.514  | 1.4439 | 1.1285 |
| 38.5  | 1.504  | 1.505  | 1.4481 | 1.4827 | 1.549  | 1.5151 | 1.5071 | 1.4398 | 1.5139 | 1.4483 | 1.1349 |
| 38.75 | 1.5035 | 1.5042 | 1.448  | 1.482  | 1.5477 | 1.5168 | 1.5077 | 1.4394 | 1.5135 | 1.4526 | 1.1386 |
| 39    | 1.5042 | 1.505  | 1.4488 | 1.4817 | 1.5476 | 1.5162 | 1.507  | 1.4377 | 1.5135 | 1.4563 | 1.1467 |
| 39.25 | 1.5058 | 1.5049 | 1.4482 | 1.4822 | 1.5485 | 1.5175 | 1.5077 | 1.4381 | 1.5127 | 1.4584 | 1.1508 |
| 39.5  | 1.507  | 1.5052 | 1.4485 | 1.4819 | 1.549  | 1.5181 | 1.5071 | 1.4371 | 1.5116 | 1.4611 | 1.155  |
| 39.75 | 1.5073 | 1.506  | 1.4484 | 1.4813 | 1.5487 | 1.5193 | 1.507  | 1.4366 | 1.5121 | 1.4624 | 1.1601 |

|       |        |        |        |        |        |        |        |        |        |        |        |
|-------|--------|--------|--------|--------|--------|--------|--------|--------|--------|--------|--------|
| 40    | 1.5077 | 1.5062 | 1.4489 | 1.4807 | 1.5491 | 1.5191 | 1.5069 | 1.4354 | 1.5125 | 1.4642 | 1.1647 |
| 40.25 | 1.5093 | 1.5063 | 1.4496 | 1.4814 | 1.5484 | 1.5201 | 1.5077 | 1.4344 | 1.5124 | 1.4662 | 1.1708 |
| 40.5  | 1.5096 | 1.506  | 1.4489 | 1.4809 | 1.5485 | 1.521  | 1.507  | 1.4333 | 1.5127 | 1.4669 | 1.1774 |
| 40.75 | 1.5108 | 1.5059 | 1.4494 | 1.4812 | 1.5486 | 1.5206 | 1.5081 | 1.4335 | 1.5126 | 1.4674 | 1.1791 |
| 41    | 1.5129 | 1.5053 | 1.4485 | 1.4806 | 1.5493 | 1.5208 | 1.5081 | 1.4335 | 1.5133 | 1.4691 | 1.1861 |
| 41.25 | 1.5127 | 1.5048 | 1.4491 | 1.48   | 1.5493 | 1.5208 | 1.5082 | 1.4321 | 1.5122 | 1.469  | 1.188  |
| 41.5  | 1.513  | 1.5052 | 1.4495 | 1.4814 | 1.5493 | 1.5221 | 1.5076 | 1.4332 | 1.5134 | 1.4699 | 1.1941 |
| 41.75 | 1.513  | 1.5045 | 1.4496 | 1.4809 | 1.5498 | 1.5214 | 1.5079 | 1.4308 | 1.5134 | 1.4706 | 1.1972 |
| 42    | 1.5143 | 1.506  | 1.4492 | 1.4805 | 1.55   | 1.5219 | 1.5076 | 1.4313 | 1.5127 | 1.4703 | 1.2037 |
| 42.25 | 1.5164 | 1.506  | 1.4512 | 1.481  | 1.5499 | 1.523  | 1.5082 | 1.4308 | 1.5125 | 1.4726 | 1.2068 |
| 42.5  | 1.5166 | 1.5062 | 1.4516 | 1.4808 | 1.5503 | 1.5231 | 1.5073 | 1.4306 | 1.5127 | 1.472  | 1.2122 |
| 42.75 | 1.518  | 1.506  | 1.4518 | 1.4818 | 1.5497 | 1.5231 | 1.5069 | 1.4305 | 1.513  | 1.473  | 1.2189 |
| 43    | 1.5154 | 1.5053 | 1.4522 | 1.4815 | 1.5511 | 1.5238 | 1.5077 | 1.4305 | 1.5141 | 1.4728 | 1.2212 |
| 43.25 | 1.5129 | 1.5059 | 1.4522 | 1.4817 | 1.5514 | 1.5232 | 1.5076 | 1.4309 | 1.5129 | 1.4734 | 1.2271 |
| 43.5  | 1.5111 | 1.5064 | 1.4527 | 1.4798 | 1.5506 | 1.524  | 1.5073 | 1.4321 | 1.5137 | 1.4725 | 1.23   |
| 43.75 | 1.5114 | 1.5084 | 1.453  | 1.4807 | 1.5515 | 1.5237 | 1.5084 | 1.4319 | 1.5137 | 1.4732 | 1.2376 |
| 44    | 1.5125 | 1.5078 | 1.4529 | 1.4806 | 1.552  | 1.5238 | 1.5101 | 1.4326 | 1.5134 | 1.4739 | 1.2424 |
| 44.25 | 1.5102 | 1.5073 | 1.4529 | 1.4802 | 1.5524 | 1.5241 | 1.5075 | 1.4324 | 1.5137 | 1.4741 | 1.2486 |
| 44.5  | 1.5105 | 1.5065 | 1.4523 | 1.4818 | 1.5501 | 1.5248 | 1.5082 | 1.4325 | 1.5123 | 1.4742 | 1.2527 |
| 44.75 | 1.5104 | 1.5065 | 1.454  | 1.4808 | 1.5526 | 1.5246 | 1.5085 | 1.4318 | 1.5129 | 1.4748 | 1.2545 |
| 45    | 1.5092 | 1.5064 | 1.4543 | 1.482  | 1.5498 | 1.5255 | 1.5079 | 1.4325 | 1.5133 | 1.4749 | 1.2598 |
| 45.25 | 1.5105 | 1.5057 | 1.4541 | 1.4811 | 1.55   | 1.5255 | 1.5082 | 1.4341 | 1.5116 | 1.4742 | 1.2625 |
| 45.5  | 1.5103 | 1.5065 | 1.4557 | 1.4819 | 1.5499 | 1.5262 | 1.5091 | 1.4344 | 1.5126 | 1.4754 | 1.2695 |
| 45.75 | 1.51   | 1.5067 | 1.4559 | 1.4829 | 1.551  | 1.5261 | 1.5095 | 1.4355 | 1.511  | 1.4749 | 1.2704 |
| 46    | 1.5108 | 1.5061 | 1.4561 | 1.4818 | 1.5503 | 1.5265 | 1.5086 | 1.4356 | 1.5116 | 1.4742 | 1.2768 |
| 46.25 | 1.5109 | 1.5064 | 1.456  | 1.4821 | 1.5509 | 1.5264 | 1.5099 | 1.4361 | 1.5116 | 1.4742 | 1.281  |
| 46.5  | 1.511  | 1.5069 | 1.4571 | 1.4822 | 1.5512 | 1.5266 | 1.5093 | 1.437  | 1.512  | 1.4741 | 1.2845 |
| 46.75 | 1.511  | 1.5052 | 1.4577 | 1.4818 | 1.5508 | 1.5262 | 1.5094 | 1.4372 | 1.5115 | 1.4747 | 1.2892 |
| 47    | 1.5111 | 1.5059 | 1.4574 | 1.4822 | 1.5514 | 1.5264 | 1.5089 | 1.4379 | 1.512  | 1.4746 | 1.2954 |
| 47.25 | 1.5102 | 1.5042 | 1.4571 | 1.4814 | 1.5496 | 1.5273 | 1.5097 | 1.4374 | 1.5134 | 1.4739 | 1.2989 |
| 47.5  | 1.5112 | 1.5044 | 1.4583 | 1.4833 | 1.5505 | 1.5276 | 1.5089 | 1.4388 | 1.5123 | 1.4738 | 1.3036 |
| 47.75 | 1.5109 | 1.5036 | 1.4575 | 1.4823 | 1.5502 | 1.5272 | 1.5099 | 1.439  | 1.5128 | 1.4742 | 1.3063 |
| 48    | 1.511  | 1.5046 | 1.4582 | 1.4824 | 1.55   | 1.5278 | 1.509  | 1.4399 | 1.5123 | 1.474  | 1.3114 |
| 48.25 | 1.511  | 1.5042 | 1.4587 | 1.4828 | 1.5505 | 1.5282 | 1.5094 | 1.4405 | 1.5112 | 1.4746 | 1.3169 |
| 48.5  | 1.5111 | 1.504  | 1.4592 | 1.4837 | 1.5498 | 1.5267 | 1.5097 | 1.4407 | 1.5125 | 1.4742 | 1.3198 |
| 48.75 | 1.5107 | 1.5019 | 1.4578 | 1.4829 | 1.5504 | 1.5273 | 1.5087 | 1.4416 | 1.5101 | 1.474  | 1.3239 |
| 49    | 1.5112 | 1.5026 | 1.4586 | 1.4828 | 1.5498 | 1.5279 | 1.5099 | 1.4413 | 1.5112 | 1.4743 | 1.3277 |
| 49.25 | 1.5109 | 1.5034 | 1.4604 | 1.4825 | 1.5498 | 1.5275 | 1.5094 | 1.4427 | 1.5121 | 1.4743 | 1.3314 |
| 49.5  | 1.5094 | 1.504  | 1.4603 | 1.482  | 1.55   | 1.5284 | 1.5101 | 1.4434 | 1.511  | 1.4745 | 1.3357 |
| 49.75 | 1.5105 | 1.5038 | 1.4602 | 1.4832 | 1.5498 | 1.527  | 1.5106 | 1.444  | 1.5122 | 1.475  | 1.339  |

3A 3)

RAD 3)

DRUG

uM

uM

0 100

0 250

3

10

30



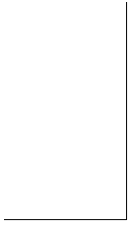

|      |        |          |           | M9      | M10    | M11    | M12      |
|------|--------|----------|-----------|---------|--------|--------|----------|
| TIME | WT     | WT(GA 3) | WT(RAD 3) | NO DRUG | GA 3uM | GA 7uM | NOVO 100 |
| 0    | 0.1894 | 0.2051   | 0.1892    | 0.1851  | 0.1707 | 0.1836 | 0.2127   |
| 0.25 | 0.1844 | 0.1929   | 0.1812    | 0.1715  | 0.1623 | 0.1696 | 0.2161   |
| 0.5  | 0.1833 | 0.1912   | 0.1787    | 0.1701  | 0.1611 | 0.1679 | 0.2173   |
| 0.75 | 0.1838 | 0.189    | 0.1758    | 0.1688  | 0.1588 | 0.1673 | 0.2188   |
| 1    | 0.1843 | 0.1877   | 0.1818    | 0.1702  | 0.1596 | 0.1672 | 0.2202   |
| 1.25 | 0.1867 | 0.1862   | 0.1836    | 0.1703  | 0.1611 | 0.1678 | 0.2205   |
| 1.5  | 0.188  | 0.186    | 0.1823    | 0.1705  | 0.1607 | 0.1687 | 0.2201   |
| 1.75 | 0.1903 | 0.1872   | 0.1822    | 0.1716  | 0.163  | 0.1691 | 0.2229   |
| 2    | 0.192  | 0.1886   | 0.1825    | 0.1722  | 0.1637 | 0.1701 | 0.2221   |

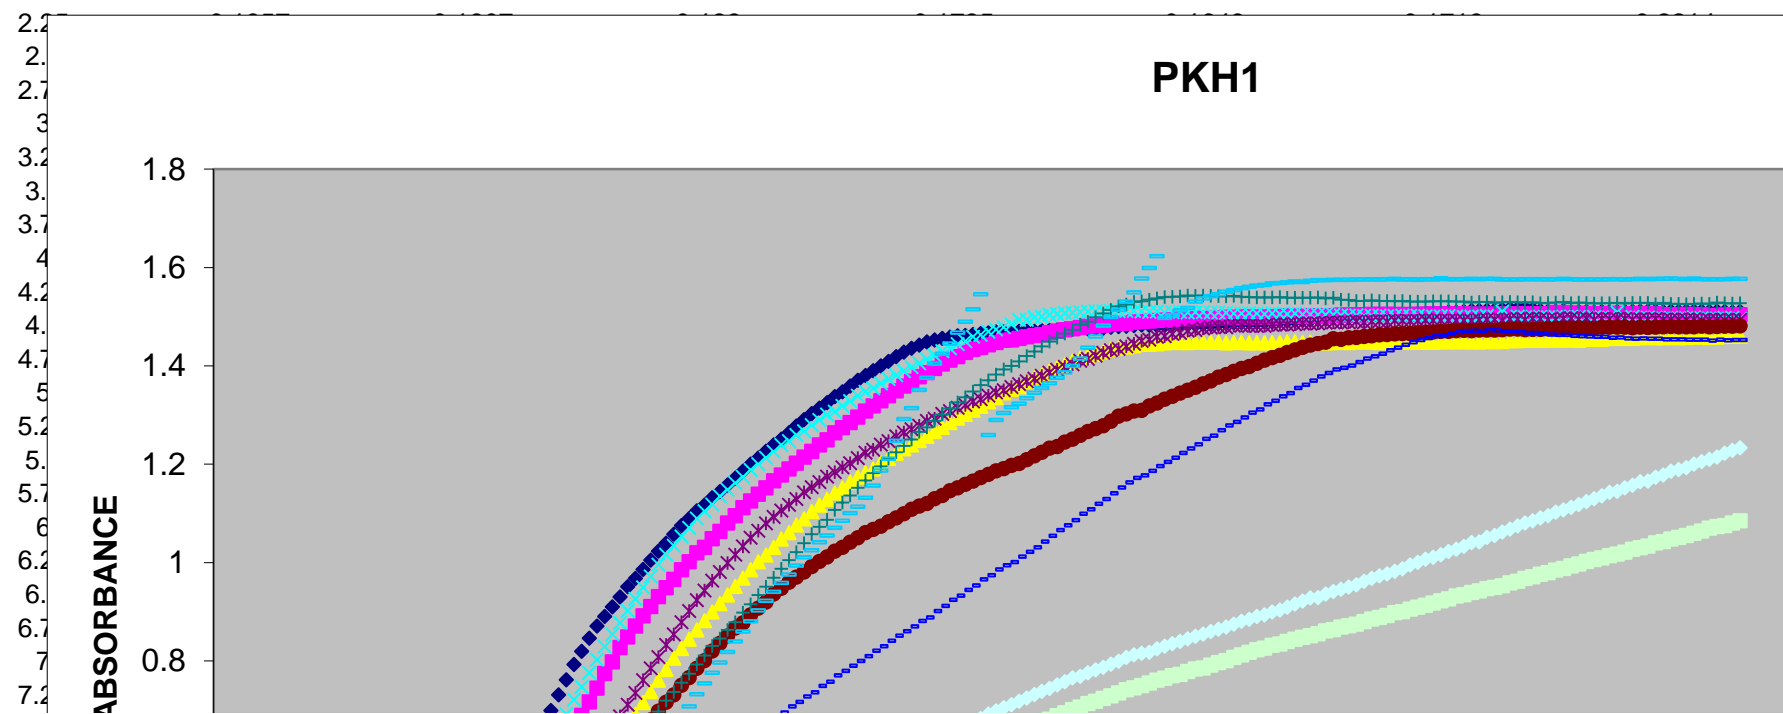

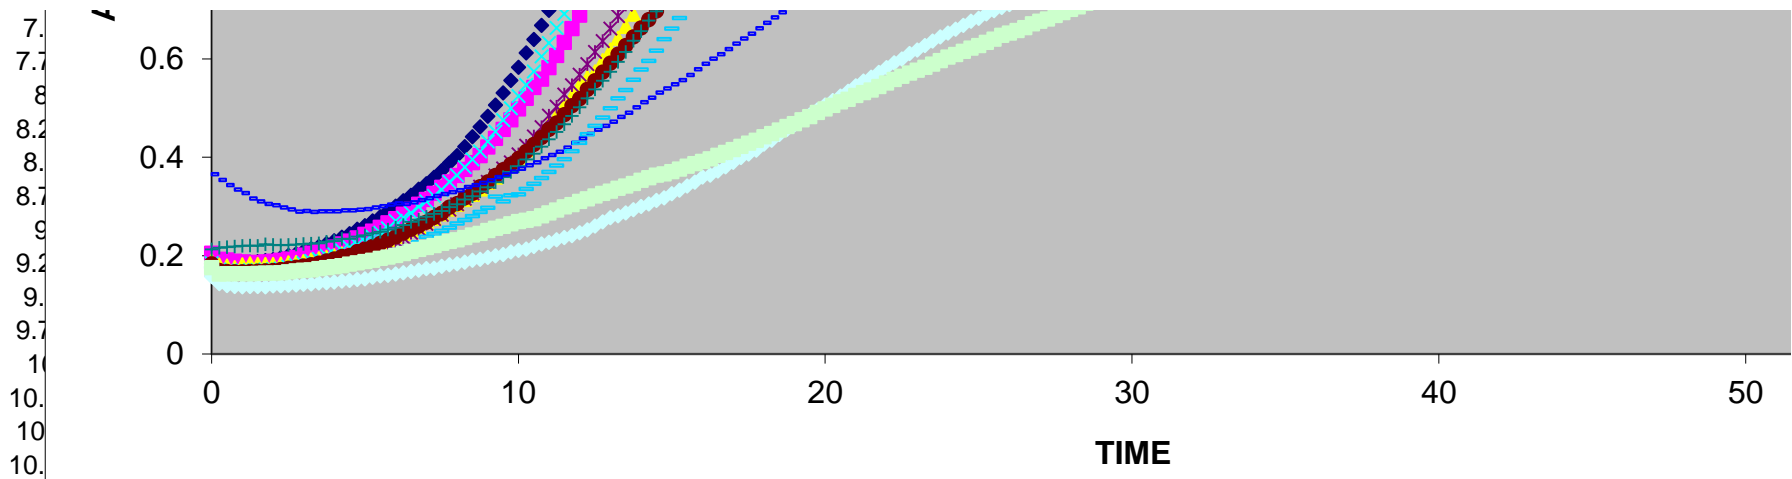

|       |        |        |        |        |        |        |        |
|-------|--------|--------|--------|--------|--------|--------|--------|
| 11.25 | 0.7307 | 0.6075 | 0.4857 | 0.6635 | 0.5031 | 0.4697 | 0.4517 |
| 11.5  | 0.7614 | 0.6339 | 0.5059 | 0.692  | 0.5275 | 0.4865 | 0.4672 |
| 11.75 | 0.7927 | 0.6618 | 0.5242 | 0.7209 | 0.5465 | 0.5048 | 0.4841 |
| 12    | 0.8194 | 0.6889 | 0.5464 | 0.7472 | 0.5684 | 0.5194 | 0.502  |
| 12.25 | 0.8459 | 0.7168 | 0.5622 | 0.776  | 0.5899 | 0.538  | 0.5201 |
| 12.5  | 0.8706 | 0.7448 | 0.5743 | 0.8022 | 0.6142 | 0.5555 | 0.538  |
| 12.75 | 0.8904 | 0.7744 | 0.5968 | 0.8294 | 0.6363 | 0.5733 | 0.5557 |
| 13    | 0.9099 | 0.7982 | 0.6186 | 0.8537 | 0.6617 | 0.5919 | 0.5739 |
| 13.25 | 0.9301 | 0.8269 | 0.6426 | 0.8773 | 0.6872 | 0.6099 | 0.5943 |
| 13.5  | 0.9508 | 0.849  | 0.6665 | 0.9021 | 0.7107 | 0.6277 | 0.6144 |
| 13.75 | 0.9679 | 0.8707 | 0.6913 | 0.926  | 0.7345 | 0.6449 | 0.6369 |
| 14    | 0.986  | 0.8918 | 0.7152 | 0.9496 | 0.7607 | 0.6635 | 0.657  |
| 14.25 | 1.0047 | 0.9106 | 0.7372 | 0.9714 | 0.7848 | 0.68   | 0.6782 |
| 14.5  | 1.0233 | 0.9308 | 0.7608 | 0.9955 | 0.8079 | 0.6977 | 0.6968 |
| 14.75 | 1.0397 | 0.9491 | 0.7825 | 1.0161 | 0.8326 | 0.716  | 0.7189 |
| 15    | 1.0577 | 0.966  | 0.8057 | 1.0339 | 0.8539 | 0.7309 | 0.7369 |
| 15.25 | 1.0753 | 0.9853 | 0.8251 | 1.0533 | 0.8785 | 0.7501 | 0.7555 |
| 15.5  | 1.0897 | 1.0015 | 0.8439 | 1.0708 | 0.9014 | 0.7658 | 0.774  |
| 15.75 | 1.1049 | 1.0198 | 0.8628 | 1.0892 | 0.9233 | 0.7849 | 0.793  |
| 16    | 1.1171 | 1.031  | 0.8817 | 1.1048 | 0.9431 | 0.8007 | 0.811  |
| 16.25 | 1.1316 | 1.0487 | 0.8996 | 1.1182 | 0.9634 | 0.8201 | 0.8304 |
| 16.5  | 1.1443 | 1.0637 | 0.9165 | 1.1353 | 0.9809 | 0.8355 | 0.8455 |
| 16.75 | 1.1579 | 1.0806 | 0.9342 | 1.1482 | 0.9993 | 0.8508 | 0.8631 |
| 17    | 1.1715 | 1.0952 | 0.9517 | 1.1615 | 1.0161 | 0.867  | 0.8789 |
| 17.25 | 1.1858 | 1.1114 | 0.9682 | 1.1742 | 1.0327 | 0.8771 | 0.8983 |
| 17.5  | 1.2004 | 1.1256 | 0.9855 | 1.1882 | 1.0502 | 0.8938 | 0.9154 |
| 17.75 | 1.2123 | 1.1388 | 1.0016 | 1.1999 | 1.0647 | 0.9073 | 0.9338 |

|       |        |        |        |        |        |        |        |
|-------|--------|--------|--------|--------|--------|--------|--------|
| 18    | 1.2261 | 1.1522 | 1.015  | 1.2129 | 1.0797 | 0.9199 | 0.951  |
| 18.25 | 1.239  | 1.1664 | 1.0307 | 1.2257 | 1.0929 | 0.9357 | 0.9691 |
| 18.5  | 1.251  | 1.1779 | 1.0478 | 1.2392 | 1.1057 | 0.9476 | 0.9871 |
| 18.75 | 1.2641 | 1.1907 | 1.0607 | 1.2471 | 1.1175 | 0.9599 | 1.0046 |
| 19    | 1.2773 | 1.2018 | 1.0765 | 1.2594 | 1.1294 | 0.9707 | 1.0211 |
| 19.25 | 1.2907 | 1.2145 | 1.0891 | 1.2673 | 1.1431 | 0.981  | 1.0391 |
| 19.5  | 1.3032 | 1.2259 | 1.1041 | 1.2798 | 1.1532 | 0.9918 | 1.0576 |
| 19.75 | 1.3141 | 1.239  | 1.1166 | 1.2899 | 1.164  | 1.0023 | 1.0724 |
| 20    | 1.3251 | 1.2497 | 1.1283 | 1.301  | 1.1745 | 1.0111 | 1.0866 |
| 20.25 | 1.3374 | 1.2637 | 1.1419 | 1.3071 | 1.1836 | 1.0229 | 1.107  |
| 20.5  | 1.3474 | 1.2743 | 1.1521 | 1.3184 | 1.1934 | 1.0311 | 1.1218 |
| 20.75 | 1.3589 | 1.2848 | 1.1637 | 1.3283 | 1.2023 | 1.0411 | 1.1364 |
| 21    | 1.3704 | 1.2956 | 1.1744 | 1.3392 | 1.2123 | 1.0504 | 1.1517 |
| 21.25 | 1.3806 | 1.3083 | 1.1829 | 1.3472 | 1.2234 | 1.0607 | 1.1671 |
| 21.5  | 1.39   | 1.3184 | 1.1906 | 1.3546 | 1.2294 | 1.0677 | 1.1821 |
| 21.75 | 1.3999 | 1.3289 | 1.2037 | 1.3644 | 1.2397 | 1.0738 | 1.1956 |
| 22    | 1.4093 | 1.3395 | 1.2116 | 1.373  | 1.2473 | 1.0829 | 1.2112 |
| 22.25 | 1.4189 | 1.3493 | 1.2223 | 1.3812 | 1.2567 | 1.0908 | 1.2244 |
| 22.5  | 1.4278 | 1.3589 | 1.2316 | 1.3893 | 1.2646 | 1.099  | 1.2372 |
| 22.75 | 1.4356 | 1.369  | 1.2391 | 1.3971 | 1.2709 | 1.1084 | 1.2506 |
| 23    | 1.4425 | 1.3781 | 1.2485 | 1.4049 | 1.2781 | 1.1147 | 1.2656 |
| 23.25 | 1.4488 | 1.3861 | 1.257  | 1.4137 | 1.2881 | 1.1201 | 1.2752 |
| 23.5  | 1.4527 | 1.3947 | 1.2667 | 1.4215 | 1.2924 | 1.1299 | 1.288  |
| 23.75 | 1.4559 | 1.4037 | 1.2752 | 1.4302 | 1.3024 | 1.1365 | 1.3008 |
| 24    | 1.4583 | 1.4119 | 1.2845 | 1.4361 | 1.3084 | 1.1464 | 1.3133 |
| 24.25 | 1.4609 | 1.4188 | 1.2937 | 1.4442 | 1.3147 | 1.1521 | 1.3258 |
| 24.5  | 1.4615 | 1.4276 | 1.3014 | 1.4504 | 1.3206 | 1.1593 | 1.3359 |
| 24.75 | 1.4635 | 1.4341 | 1.3101 | 1.4595 | 1.3275 | 1.1657 | 1.348  |
| 25    | 1.466  | 1.4379 | 1.3177 | 1.4631 | 1.3326 | 1.1725 | 1.3611 |
| 25.25 | 1.4669 | 1.4431 | 1.3269 | 1.4694 | 1.3392 | 1.1794 | 1.3704 |
| 25.5  | 1.4687 | 1.4476 | 1.3358 | 1.4742 | 1.3459 | 1.1865 | 1.3821 |
| 25.75 | 1.4687 | 1.4518 | 1.345  | 1.4789 | 1.3502 | 1.1912 | 1.3927 |
| 26    | 1.4682 | 1.453  | 1.3526 | 1.4848 | 1.3572 | 1.1973 | 1.4    |
| 26.25 | 1.4704 | 1.4557 | 1.3577 | 1.4936 | 1.3626 | 1.2012 | 1.409  |
| 26.5  | 1.4702 | 1.4595 | 1.368  | 1.4934 | 1.3688 | 1.2094 | 1.4202 |
| 26.75 | 1.4706 | 1.4619 | 1.3756 | 1.4988 | 1.374  | 1.2172 | 1.4294 |
| 27    | 1.4716 | 1.4639 | 1.3808 | 1.5003 | 1.38   | 1.2241 | 1.4395 |
| 27.25 | 1.4725 | 1.4677 | 1.3894 | 1.5042 | 1.3861 | 1.2325 | 1.4494 |
| 27.5  | 1.473  | 1.4709 | 1.396  | 1.5051 | 1.3919 | 1.236  | 1.4571 |
| 27.75 | 1.4747 | 1.4735 | 1.4025 | 1.5072 | 1.3981 | 1.2449 | 1.4655 |
| 28    | 1.4747 | 1.4758 | 1.4095 | 1.5083 | 1.4033 | 1.2512 | 1.4737 |
| 28.25 | 1.4772 | 1.4784 | 1.4156 | 1.5094 | 1.4103 | 1.259  | 1.484  |

|       |        |        |        |        |        |        |        |
|-------|--------|--------|--------|--------|--------|--------|--------|
| 28.5  | 1.4758 | 1.4806 | 1.4201 | 1.5107 | 1.4146 | 1.2668 | 1.4901 |
| 28.75 | 1.4763 | 1.4813 | 1.4239 | 1.511  | 1.4209 | 1.2724 | 1.4991 |
| 29    | 1.4771 | 1.4829 | 1.4289 | 1.511  | 1.4266 | 1.278  | 1.5065 |
| 29.25 | 1.4786 | 1.485  | 1.4341 | 1.5117 | 1.4317 | 1.2877 | 1.5139 |
| 29.5  | 1.4803 | 1.4861 | 1.4367 | 1.511  | 1.4345 | 1.2978 | 1.5208 |
| 29.75 | 1.4807 | 1.4866 | 1.4387 | 1.5121 | 1.4396 | 1.3026 | 1.525  |
| 30    | 1.4823 | 1.4892 | 1.4412 | 1.5117 | 1.445  | 1.3085 | 1.53   |
| 30.25 | 1.4831 | 1.49   | 1.4444 | 1.5108 | 1.4506 | 1.3098 | 1.5316 |
| 30.5  | 1.4829 | 1.4913 | 1.4444 | 1.5102 | 1.4535 | 1.3184 | 1.5347 |
| 30.75 | 1.4823 | 1.4923 | 1.4446 | 1.5106 | 1.4589 | 1.3243 | 1.5374 |
| 31    | 1.4825 | 1.4929 | 1.4466 | 1.509  | 1.4608 | 1.332  | 1.5397 |
| 31.25 | 1.4843 | 1.4939 | 1.448  | 1.5094 | 1.4652 | 1.3384 | 1.5408 |
| 31.5  | 1.4842 | 1.496  | 1.4475 | 1.5099 | 1.4667 | 1.3447 | 1.541  |
| 31.75 | 1.4837 | 1.4956 | 1.4475 | 1.5087 | 1.4716 | 1.3504 | 1.5432 |
| 32    | 1.4837 | 1.4964 | 1.4488 | 1.5095 | 1.473  | 1.3565 | 1.5422 |
| 32.25 | 1.4847 | 1.4969 | 1.4483 | 1.5093 | 1.4761 | 1.3634 | 1.5432 |
| 32.5  | 1.4848 | 1.4964 | 1.448  | 1.5087 | 1.478  | 1.3691 | 1.5427 |
| 32.75 | 1.4858 | 1.4974 | 1.448  | 1.5084 | 1.4795 | 1.3774 | 1.542  |
| 33    | 1.4867 | 1.4992 | 1.4467 | 1.5078 | 1.4788 | 1.3821 | 1.5412 |
| 33.25 | 1.4876 | 1.498  | 1.4476 | 1.5067 | 1.4817 | 1.3886 | 1.5424 |
| 33.5  | 1.4885 | 1.4993 | 1.4481 | 1.5069 | 1.4821 | 1.3945 | 1.5405 |
| 33.75 | 1.4883 | 1.4994 | 1.4469 | 1.5072 | 1.4815 | 1.3987 | 1.5396 |
| 34    | 1.4888 | 1.4988 | 1.4474 | 1.5066 | 1.4816 | 1.4049 | 1.5394 |
| 34.25 | 1.4892 | 1.4995 | 1.4471 | 1.5053 | 1.4814 | 1.4117 | 1.5392 |
| 34.5  | 1.4899 | 1.4996 | 1.4474 | 1.507  | 1.4833 | 1.4167 | 1.5391 |
| 34.75 | 1.4919 | 1.5003 | 1.4472 | 1.5052 | 1.4838 | 1.4214 | 1.5397 |
| 35    | 1.492  | 1.5014 | 1.4486 | 1.5057 | 1.4842 | 1.4273 | 1.5385 |
| 35.25 | 1.4922 | 1.502  | 1.4486 | 1.5065 | 1.4843 | 1.4327 | 1.5386 |
| 35.5  | 1.4933 | 1.5004 | 1.4477 | 1.5046 | 1.4863 | 1.4377 | 1.5384 |
| 35.75 | 1.4939 | 1.5019 | 1.4479 | 1.5045 | 1.4856 | 1.4423 | 1.5388 |
| 36    | 1.4951 | 1.5018 | 1.4476 | 1.5039 | 1.4865 | 1.4454 | 1.539  |
| 36.25 | 1.4965 | 1.5015 | 1.4469 | 1.5041 | 1.4876 | 1.4482 | 1.5373 |
| 36.5  | 1.4976 | 1.5021 | 1.4473 | 1.5043 | 1.4888 | 1.4556 | 1.5388 |
| 36.75 | 1.4983 | 1.5037 | 1.4481 | 1.5028 | 1.4882 | 1.4542 | 1.535  |
| 37    | 1.4992 | 1.5034 | 1.4477 | 1.5021 | 1.4886 | 1.4574 | 1.5342 |
| 37.25 | 1.4997 | 1.504  | 1.449  | 1.503  | 1.4907 | 1.458  | 1.5324 |
| 37.5  | 1.5011 | 1.5037 | 1.4489 | 1.5015 | 1.4886 | 1.4598 | 1.532  |
| 37.75 | 1.502  | 1.505  | 1.4486 | 1.5019 | 1.4905 | 1.4613 | 1.5333 |
| 38    | 1.5029 | 1.5047 | 1.4475 | 1.502  | 1.4909 | 1.463  | 1.5321 |
| 38.25 | 1.5029 | 1.5046 | 1.449  | 1.501  | 1.4898 | 1.4635 | 1.5323 |
| 38.5  | 1.504  | 1.505  | 1.4481 | 1.5018 | 1.4923 | 1.4649 | 1.5313 |
| 38.75 | 1.5035 | 1.5042 | 1.448  | 1.5019 | 1.4915 | 1.466  | 1.5323 |

|       |        |        |        |        |        |        |        |
|-------|--------|--------|--------|--------|--------|--------|--------|
| 39    | 1.5042 | 1.505  | 1.4488 | 1.5013 | 1.4911 | 1.4659 | 1.531  |
| 39.25 | 1.5058 | 1.5049 | 1.4482 | 1.502  | 1.4919 | 1.4667 | 1.5307 |
| 39.5  | 1.507  | 1.5052 | 1.4485 | 1.5009 | 1.493  | 1.468  | 1.5311 |
| 39.75 | 1.5073 | 1.506  | 1.4484 | 1.5    | 1.4925 | 1.469  | 1.5315 |
| 40    | 1.5077 | 1.5062 | 1.4489 | 1.5006 | 1.4925 | 1.47   | 1.5316 |
| 40.25 | 1.5093 | 1.5063 | 1.4496 | 1.5014 | 1.4926 | 1.4706 | 1.5315 |
| 40.5  | 1.5096 | 1.506  | 1.4489 | 1.5002 | 1.4926 | 1.4713 | 1.5309 |
| 40.75 | 1.5108 | 1.5059 | 1.4494 | 1.4994 | 1.4926 | 1.4725 | 1.5309 |
| 41    | 1.5129 | 1.5053 | 1.4485 | 1.4999 | 1.4918 | 1.4714 | 1.5289 |
| 41.25 | 1.5127 | 1.5048 | 1.4491 | 1.4999 | 1.4939 | 1.4728 | 1.5303 |
| 41.5  | 1.513  | 1.5052 | 1.4495 | 1.5015 | 1.4946 | 1.4728 | 1.5301 |
| 41.75 | 1.513  | 1.5045 | 1.4496 | 1.5001 | 1.4941 | 1.4732 | 1.5284 |
| 42    | 1.5143 | 1.506  | 1.4492 | 1.5104 | 1.4933 | 1.4734 | 1.5296 |
| 42.25 | 1.5164 | 1.506  | 1.4512 | 1.5001 | 1.4953 | 1.4748 | 1.5303 |
| 42.5  | 1.5166 | 1.5062 | 1.4516 | 1.5004 | 1.4953 | 1.4747 | 1.5298 |
| 42.75 | 1.518  | 1.506  | 1.4518 | 1.4991 | 1.4937 | 1.4737 | 1.5289 |
| 43    | 1.5154 | 1.5053 | 1.4522 | 1.4993 | 1.4962 | 1.4743 | 1.5295 |
| 43.25 | 1.5129 | 1.5059 | 1.4522 | 1.4997 | 1.4956 | 1.4739 | 1.5277 |
| 43.5  | 1.5111 | 1.5064 | 1.4527 | 1.4988 | 1.4938 | 1.4755 | 1.5281 |
| 43.75 | 1.5114 | 1.5084 | 1.453  | 1.4996 | 1.4943 | 1.476  | 1.5287 |
| 44    | 1.5125 | 1.5078 | 1.4529 | 1.4995 | 1.4965 | 1.4769 | 1.53   |
| 44.25 | 1.5102 | 1.5073 | 1.4529 | 1.5002 | 1.4972 | 1.4771 | 1.5276 |
| 44.5  | 1.5105 | 1.5065 | 1.4523 | 1.4995 | 1.4943 | 1.4772 | 1.5288 |
| 44.75 | 1.5104 | 1.5065 | 1.454  | 1.4985 | 1.4967 | 1.4771 | 1.528  |
| 45    | 1.5092 | 1.5064 | 1.4543 | 1.4996 | 1.4934 | 1.4763 | 1.5268 |
| 45.25 | 1.5105 | 1.5057 | 1.4541 | 1.499  | 1.4959 | 1.4786 | 1.5275 |
| 45.5  | 1.5103 | 1.5065 | 1.4557 | 1.498  | 1.495  | 1.4785 | 1.5274 |
| 45.75 | 1.51   | 1.5067 | 1.4559 | 1.5094 | 1.4958 | 1.4787 | 1.528  |
| 46    | 1.5108 | 1.5061 | 1.4561 | 1.4988 | 1.4957 | 1.4785 | 1.5271 |
| 46.25 | 1.5109 | 1.5064 | 1.456  | 1.4996 | 1.494  | 1.4772 | 1.5281 |
| 46.5  | 1.511  | 1.5069 | 1.4571 | 1.4978 | 1.4953 | 1.4789 | 1.528  |
| 46.75 | 1.511  | 1.5052 | 1.4577 | 1.4983 | 1.4941 | 1.4778 | 1.5282 |
| 47    | 1.5111 | 1.5059 | 1.4574 | 1.4983 | 1.4954 | 1.4788 | 1.5257 |
| 47.25 | 1.5102 | 1.5042 | 1.4571 | 1.4966 | 1.4937 | 1.4793 | 1.528  |
| 47.5  | 1.5112 | 1.5044 | 1.4583 | 1.4975 | 1.4941 | 1.4799 | 1.5264 |
| 47.75 | 1.5109 | 1.5036 | 1.4575 | 1.4967 | 1.4943 | 1.4792 | 1.5262 |
| 48    | 1.511  | 1.5046 | 1.4582 | 1.4971 | 1.4938 | 1.4795 | 1.5256 |
| 48.25 | 1.511  | 1.5042 | 1.4587 | 1.4982 | 1.4947 | 1.4795 | 1.5264 |
| 48.5  | 1.5111 | 1.504  | 1.4592 | 1.4969 | 1.4927 | 1.4805 | 1.5267 |
| 48.75 | 1.5107 | 1.5019 | 1.4578 | 1.4962 | 1.4934 | 1.4793 | 1.526  |
| 49    | 1.5112 | 1.5026 | 1.4586 | 1.4964 | 1.4937 | 1.4803 | 1.5288 |
| 49.25 | 1.5109 | 1.5034 | 1.4604 | 1.4979 | 1.4932 | 1.4809 | 1.5278 |

|       |        |        |        |        |        |        |        |
|-------|--------|--------|--------|--------|--------|--------|--------|
| 49.5  | 1.5094 | 1.504  | 1.4603 | 1.4976 | 1.4933 | 1.4809 | 1.5271 |
| 49.75 | 1.5105 | 1.5038 | 1.4602 | 1.4954 | 1.4934 | 1.4813 | 1.5276 |

| M13             | M14          | M15           | M16           |
|-----------------|--------------|---------------|---------------|
| <b>NOVO 250</b> | <b>RAD 3</b> | <b>RAD 10</b> | <b>RAD 30</b> |
| 0.3659          | 0.1761       | 0.1576        | 0.176         |
| 0.354           | 0.1636       | 0.1434        | 0.1628        |
| 0.3433          | 0.1613       | 0.1395        | 0.1631        |
| 0.3345          | 0.1596       | 0.1375        | 0.1635        |
| 0.3276          | 0.1595       | 0.1368        | 0.1632        |
| 0.316           | 0.1588       | 0.1374        | 0.1636        |
| 0.3105          | 0.1599       | 0.137         | 0.1641        |
| 0.3053          | 0.1604       | 0.1369        | 0.1643        |
| 0.3023          | 0.1613       | 0.1387        | 0.1643        |

654  
673  
689  
702  
712  
739  
754  
776  
798  
829  
856  
881  
909  
946  
197  
006  
042  
089  
131  
165  
205

- ◆ WT
- WT(GA 3)
- ▲ WT(RAD 3)
- × NO DRUG
- \* GA 3uM
- GA 7uM
- + NOVO 100
- NOVO 250

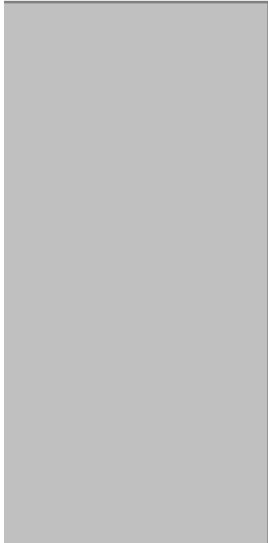



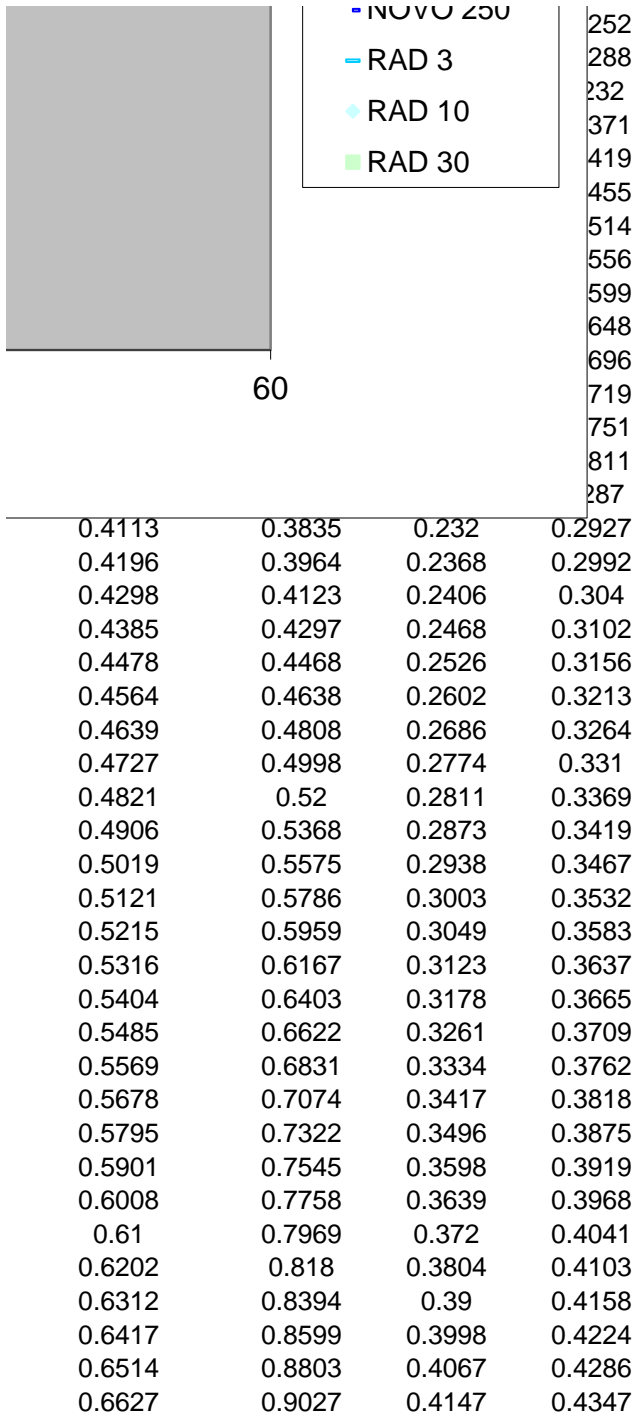

|        |        |        |        |
|--------|--------|--------|--------|
| 0.6735 | 0.9223 | 0.427  | 0.4416 |
| 0.6848 | 0.9403 | 0.4347 | 0.4484 |
| 0.695  | 0.9587 | 0.4465 | 0.4555 |
| 0.7076 | 0.9759 | 0.457  | 0.463  |
| 0.7168 | 0.9937 | 0.4662 | 0.4683 |
| 0.7275 | 1.011  | 0.4773 | 0.4764 |
| 0.7364 | 1.0249 | 0.4864 | 0.4827 |
| 0.7493 | 1.0415 | 0.4963 | 0.4912 |
| 0.7576 | 1.0552 | 0.5063 | 0.4982 |
| 0.7707 | 1.0707 | 0.5155 | 0.5056 |
| 0.7797 | 1.0852 | 0.5248 | 0.5129 |
| 0.7902 | 1.1008 | 0.5342 | 0.5183 |
| 0.7998 | 1.1138 | 0.5453 | 0.5257 |
| 0.8098 | 1.1317 | 0.5551 | 0.5314 |
| 0.8205 | 1.1564 | 0.5629 | 0.5368 |
| 0.8296 | 1.1873 | 0.573  | 0.5441 |
| 0.8408 | 1.2113 | 0.5824 | 0.5512 |
| 0.851  | 1.2477 | 0.592  | 0.5587 |
| 0.8605 | 1.2922 | 0.6003 | 0.565  |
| 0.8704 | 1.314  | 0.6113 | 0.5717 |
| 0.8814 | 1.3512 | 0.6181 | 0.5773 |
| 0.8885 | 1.3762 | 0.6271 | 0.5831 |
| 0.9013 | 1.4043 | 0.6365 | 0.5897 |
| 0.912  | 1.4247 | 0.6451 | 0.597  |
| 0.9242 | 1.4457 | 0.6529 | 0.6042 |
| 0.9327 | 1.4676 | 0.6609 | 0.6093 |
| 0.9442 | 1.4898 | 0.6681 | 0.6159 |
| 0.9534 | 1.5151 | 0.6766 | 0.6222 |
| 0.9659 | 1.5459 | 0.6825 | 0.6274 |
| 0.974  | 1.2593 | 0.6915 | 0.6341 |
| 0.9857 | 1.2903 | 0.6986 | 0.6404 |
| 0.9943 | 1.3044 | 0.7049 | 0.6481 |
| 1.0009 | 1.3163 | 0.7107 | 0.6526 |
| 1.0121 | 1.3232 | 0.7176 | 0.6579 |
| 1.0219 | 1.3345 | 0.7243 | 0.664  |
| 1.0309 | 1.3456 | 0.7315 | 0.6717 |
| 1.0424 | 1.3548 | 0.7378 | 0.677  |
| 1.0544 | 1.3647 | 0.7442 | 0.6817 |
| 1.0658 | 1.3759 | 0.751  | 0.6888 |
| 1.0756 | 1.387  | 0.7573 | 0.6947 |
| 1.0864 | 1.4003 | 0.7651 | 0.701  |
| 1.0991 | 1.4151 | 0.7689 | 0.706  |

|        |        |        |        |
|--------|--------|--------|--------|
| 1.1082 | 1.4368 | 0.7758 | 0.7133 |
| 1.1196 | 1.46   | 0.7816 | 0.7181 |
| 1.1292 | 1.482  | 0.787  | 0.7234 |
| 1.1411 | 1.4997 | 0.7933 | 0.7291 |
| 1.1524 | 1.5139 | 0.7995 | 0.7347 |
| 1.163  | 1.5305 | 0.8069 | 0.741  |
| 1.1719 | 1.5494 | 0.8123 | 0.7452 |
| 1.1775 | 1.5774 | 0.8158 | 0.7495 |
| 1.1867 | 1.5991 | 0.8175 | 0.7547 |
| 1.1965 | 1.6232 | 0.8248 | 0.7611 |
| 1.205  | 1.4973 | 0.83   | 0.7646 |
| 1.2133 | 1.5034 | 0.8349 | 0.7699 |
| 1.2229 | 1.5134 | 0.8394 | 0.7725 |
| 1.2318 | 1.5179 | 0.8447 | 0.7781 |
| 1.2405 | 1.5309 | 0.8501 | 0.7833 |
| 1.2518 | 1.537  | 0.8547 | 0.7854 |
| 1.2583 | 1.5418 | 0.86   | 0.7913 |
| 1.2693 | 1.5459 | 0.8641 | 0.7967 |
| 1.2791 | 1.5509 | 0.8691 | 0.8002 |
| 1.2861 | 1.5542 | 0.8747 | 0.8073 |
| 1.2953 | 1.5579 | 0.8807 | 0.8124 |
| 1.3047 | 1.561  | 0.8844 | 0.8176 |
| 1.3115 | 1.5636 | 0.8901 | 0.8224 |
| 1.3216 | 1.5645 | 0.8939 | 0.8259 |
| 1.3289 | 1.5682 | 0.8993 | 0.832  |
| 1.338  | 1.5685 | 0.9036 | 0.8345 |
| 1.3449 | 1.5697 | 0.9091 | 0.8398 |
| 1.3551 | 1.5715 | 0.9157 | 0.8444 |
| 1.3619 | 1.5702 | 0.9214 | 0.8481 |
| 1.3703 | 1.573  | 0.928  | 0.8516 |
| 1.3787 | 1.5743 | 0.9289 | 0.8552 |
| 1.3855 | 1.5742 | 0.9362 | 0.8609 |
| 1.3926 | 1.575  | 0.9413 | 0.8636 |
| 1.3964 | 1.5753 | 0.9458 | 0.8688 |
| 1.4006 | 1.5752 | 0.95   | 0.8716 |
| 1.408  | 1.5754 | 0.9548 | 0.8744 |
| 1.4149 | 1.5758 | 0.9618 | 0.88   |
| 1.4195 | 1.5764 | 0.9675 | 0.885  |
| 1.425  | 1.5758 | 0.973  | 0.8884 |
| 1.432  | 1.5765 | 0.9771 | 0.8925 |
| 1.4374 | 1.5773 | 0.9822 | 0.8979 |
| 1.4427 | 1.5758 | 0.9873 | 0.9002 |

|        |        |        |        |
|--------|--------|--------|--------|
| 1.4479 | 1.5763 | 0.9954 | 0.9053 |
| 1.4524 | 1.5751 | 1.0002 | 0.909  |
| 1.4566 | 1.5763 | 1.0067 | 0.9132 |
| 1.4603 | 1.5759 | 1.0106 | 0.9174 |
| 1.4619 | 1.5781 | 1.0161 | 0.9224 |
| 1.466  | 1.5765 | 1.0224 | 0.9262 |
| 1.4689 | 1.5761 | 1.027  | 0.9318 |
| 1.4707 | 1.5765 | 1.0328 | 0.9344 |
| 1.4715 | 1.5767 | 1.0407 | 0.9391 |
| 1.4711 | 1.5763 | 1.0421 | 0.9427 |
| 1.4726 | 1.5768 | 1.0511 | 0.9467 |
| 1.4723 | 1.5769 | 1.0547 | 0.9498 |
| 1.4701 | 1.5755 | 1.0624 | 0.9526 |
| 1.4702 | 1.5759 | 1.0679 | 0.9586 |
| 1.4688 | 1.5758 | 1.0743 | 0.9618 |
| 1.4672 | 1.5765 | 1.0801 | 0.9678 |
| 1.4667 | 1.5766 | 1.0851 | 0.9709 |
| 1.4652 | 1.5764 | 1.0907 | 0.9762 |
| 1.464  | 1.5757 | 1.0955 | 0.9798 |
| 1.4633 | 1.5764 | 1.1025 | 0.9847 |
| 1.4629 | 1.5768 | 1.1069 | 0.9882 |
| 1.4612 | 1.5762 | 1.1124 | 0.9931 |
| 1.4608 | 1.5759 | 1.1184 | 0.9971 |
| 1.4596 | 1.576  | 1.1238 | 1.0022 |
| 1.4591 | 1.5759 | 1.1301 | 1.0062 |
| 1.4589 | 1.576  | 1.1355 | 1.0097 |
| 1.4575 | 1.5764 | 1.1428 | 1.0142 |
| 1.4577 | 1.5764 | 1.1451 | 1.0172 |
| 1.4561 | 1.576  | 1.1522 | 1.0211 |
| 1.4556 | 1.5762 | 1.1573 | 1.027  |
| 1.4557 | 1.5769 | 1.1644 | 1.0305 |
| 1.455  | 1.5765 | 1.1659 | 1.0335 |
| 1.455  | 1.5771 | 1.1732 | 1.0402 |
| 1.4537 | 1.5771 | 1.178  | 1.0428 |
| 1.4541 | 1.5778 | 1.1859 | 1.0478 |
| 1.4542 | 1.5767 | 1.1889 | 1.0512 |
| 1.4532 | 1.5761 | 1.1932 | 1.0547 |
| 1.4532 | 1.5776 | 1.1999 | 1.0598 |
| 1.4535 | 1.5763 | 1.2052 | 1.0639 |
| 1.4516 | 1.5763 | 1.2101 | 1.0698 |
| 1.4531 | 1.5761 | 1.2142 | 1.0734 |
| 1.4522 | 1.5761 | 1.2226 | 1.0753 |

|        |        |        |        |
|--------|--------|--------|--------|
| 1.4526 | 1.5773 | 1.228  | 1.0801 |
| 1.4529 | 1.5771 | 1.2335 | 1.0847 |

PRS 3

J1 J2 J3 J4 J5 J6 J7 J8

| TIME | WT     | WT(GA 3) | WT(RAD 3) | NO DRUG | GA 3uM | GA 7uM | NOVO 10 | NOVO 250 | RAD 3  | RAD 10 | RAD 30 |
|------|--------|----------|-----------|---------|--------|--------|---------|----------|--------|--------|--------|
| 0    | 0.1894 | 0.2051   | 0.1892    | 0.1537  | 0.1538 | 0.1394 | 0.1963  | 0.2387   | 0.1524 | 0.1568 | 0.1497 |
| 0.25 | 0.1844 | 0.1929   | 0.1812    | 0.1458  | 0.1441 | 0.1336 | 0.1999  | 0.2405   | 0.1411 | 0.1441 | 0.1382 |
| 0.5  | 0.1833 | 0.1912   | 0.1787    | 0.1425  | 0.1411 | 0.1313 | 0.2014  | 0.2424   | 0.1392 | 0.1422 | 0.1368 |
| 0.75 | 0.1838 | 0.189    | 0.1758    | 0.1404  | 0.1403 | 0.1293 | 0.2015  | 0.243    | 0.1381 | 0.1414 | 0.1358 |
| 1    | 0.1843 | 0.1877   | 0.1818    | 0.1391  | 0.1401 | 0.1298 | 0.2022  | 0.2439   | 0.1363 | 0.1417 | 0.1354 |
| 1.25 | 0.1867 | 0.1862   | 0.1836    | 0.1395  | 0.139  | 0.1305 | 0.2025  | 0.2444   | 0.1381 | 0.142  | 0.1358 |
| 1.5  | 0.188  | 0.186    | 0.1823    | 0.1393  | 0.1395 | 0.13   | 0.2028  | 0.2449   | 0.1364 | 0.1418 | 0.1345 |
| 1.75 | 0.1903 | 0.1872   | 0.1822    | 0.1394  | 0.139  | 0.1297 | 0.2028  | 0.2462   | 0.1367 | 0.1422 | 0.1348 |

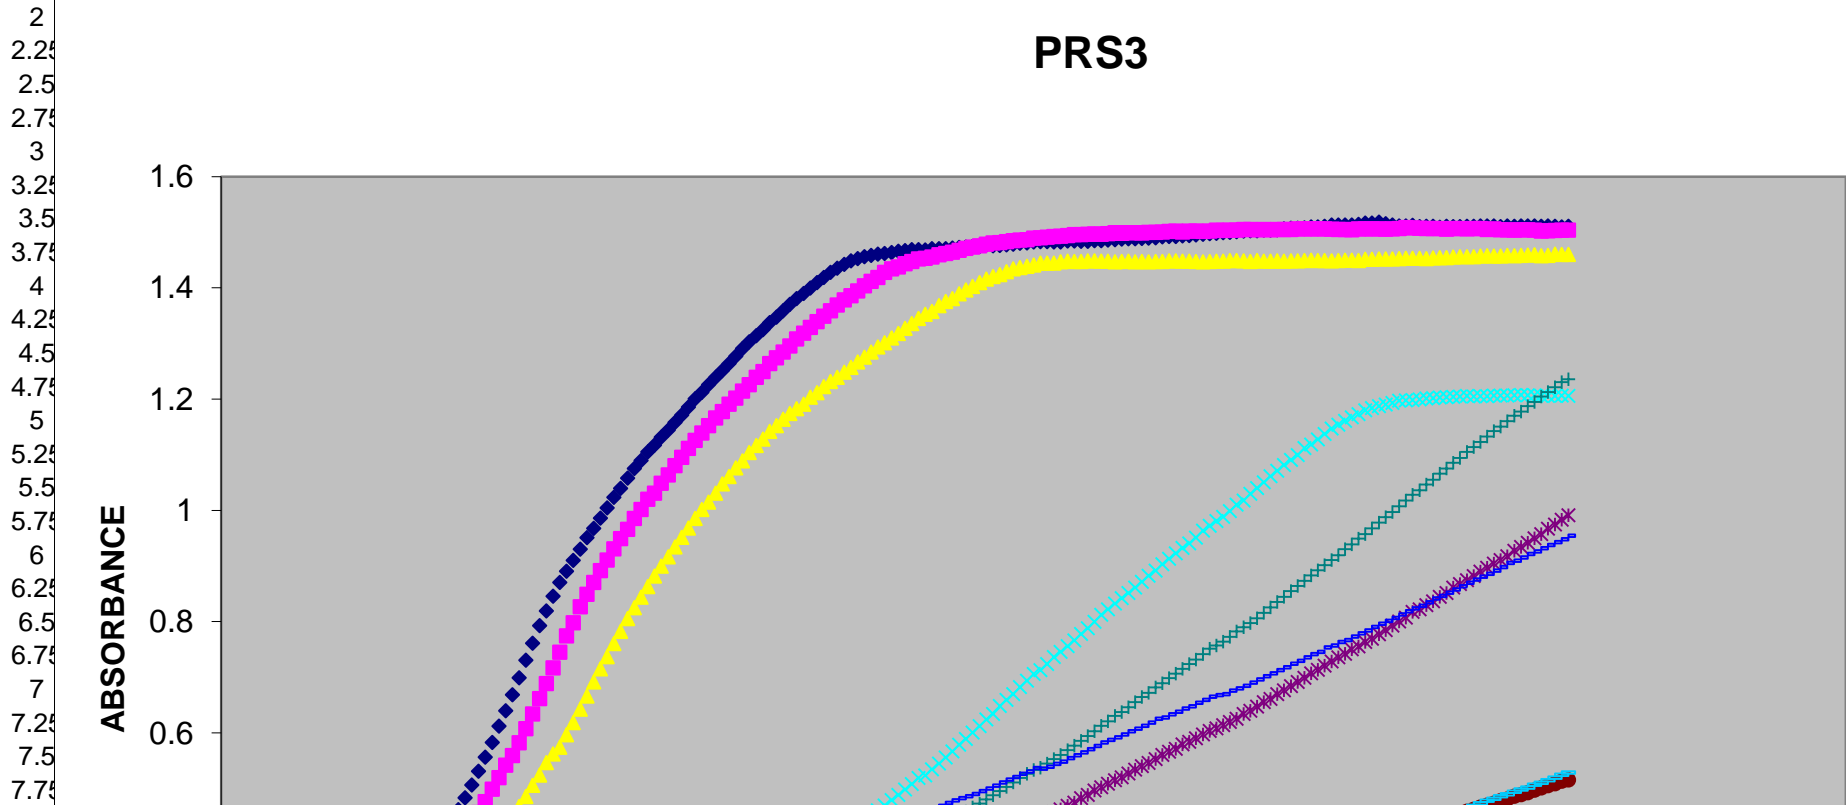

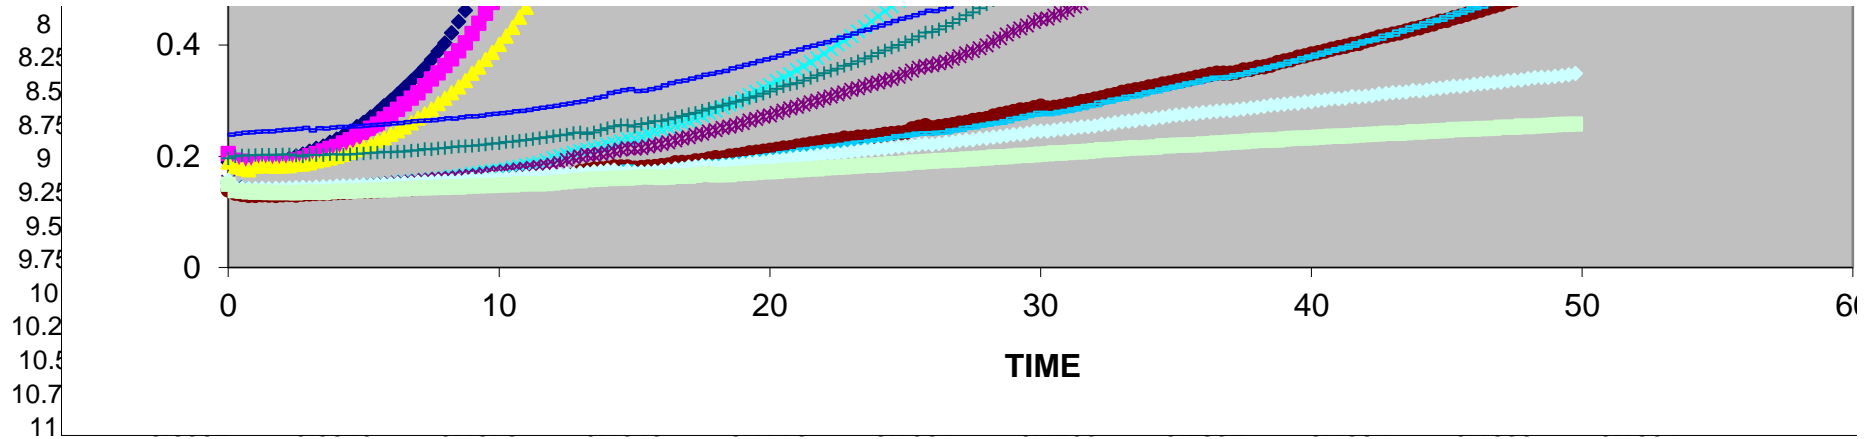

|       |        |        |        |        |        |        |        |        |        |        |        |
|-------|--------|--------|--------|--------|--------|--------|--------|--------|--------|--------|--------|
| 11.25 | 0.7307 | 0.6075 | 0.4857 | 0.1859 | 0.1788 | 0.1573 | 0.2311 | 0.2856 | 0.1586 | 0.164  | 0.1507 |
| 11.5  | 0.7614 | 0.6339 | 0.5059 | 0.1883 | 0.1806 | 0.1588 | 0.2325 | 0.2874 | 0.1609 | 0.1648 | 0.1505 |
| 11.75 | 0.7927 | 0.6618 | 0.5242 | 0.1925 | 0.1826 | 0.1604 | 0.2344 | 0.2889 | 0.1611 | 0.1658 | 0.151  |
| 12    | 0.8194 | 0.6889 | 0.5464 | 0.1966 | 0.185  | 0.1612 | 0.2359 | 0.2908 | 0.1626 | 0.1669 | 0.1519 |
| 12.25 | 0.8459 | 0.7168 | 0.5622 | 0.2002 | 0.1876 | 0.1616 | 0.2378 | 0.293  | 0.1624 | 0.1672 | 0.1538 |
| 12.5  | 0.8706 | 0.7448 | 0.5743 | 0.2033 | 0.1932 | 0.1629 | 0.2388 | 0.2947 | 0.1647 | 0.1679 | 0.1544 |
| 12.75 | 0.8904 | 0.7744 | 0.5968 | 0.2066 | 0.1976 | 0.1665 | 0.2418 | 0.2968 | 0.1647 | 0.1681 | 0.1558 |
| 13    | 0.9099 | 0.7982 | 0.6186 | 0.2093 | 0.1997 | 0.1719 | 0.2428 | 0.2989 | 0.166  | 0.1696 | 0.1563 |
| 13.25 | 0.9301 | 0.8269 | 0.6426 | 0.2119 | 0.2025 | 0.1746 | 0.2403 | 0.3024 | 0.1669 | 0.1706 | 0.158  |
| 13.5  | 0.9508 | 0.849  | 0.6665 | 0.2147 | 0.2023 | 0.1765 | 0.243  | 0.3049 | 0.1686 | 0.1721 | 0.1587 |
| 13.75 | 0.9679 | 0.8707 | 0.6913 | 0.2168 | 0.2046 | 0.1772 | 0.2469 | 0.3074 | 0.1701 | 0.1729 | 0.1592 |
| 14    | 0.986  | 0.8918 | 0.7152 | 0.2208 | 0.2063 | 0.1786 | 0.2506 | 0.3134 | 0.1705 | 0.1743 | 0.1599 |
| 14.25 | 1.0047 | 0.9106 | 0.7372 | 0.2233 | 0.2094 | 0.1806 | 0.2539 | 0.3161 | 0.1743 | 0.1751 | 0.1601 |
| 14.5  | 1.0233 | 0.9308 | 0.7608 | 0.227  | 0.2118 | 0.1806 | 0.2563 | 0.3189 | 0.1785 | 0.1704 | 0.1608 |
| 14.75 | 1.0397 | 0.9491 | 0.7825 | 0.2313 | 0.2145 | 0.1805 | 0.2554 | 0.3206 | 0.1812 | 0.1738 | 0.1609 |
| 15    | 1.0577 | 0.966  | 0.8057 | 0.232  | 0.2137 | 0.1786 | 0.2535 | 0.317  | 0.1774 | 0.1711 | 0.1619 |
| 15.25 | 1.0753 | 0.9853 | 0.8251 | 0.2356 | 0.2148 | 0.1796 | 0.2578 | 0.3174 | 0.1766 | 0.1716 | 0.1629 |
| 15.5  | 1.0897 | 1.0015 | 0.8439 | 0.2403 | 0.2174 | 0.1808 | 0.2598 | 0.3208 | 0.1762 | 0.1721 | 0.1636 |
| 15.75 | 1.1049 | 1.0198 | 0.8628 | 0.2446 | 0.2199 | 0.1815 | 0.2629 | 0.3226 | 0.1775 | 0.1727 | 0.1623 |
| 16    | 1.1171 | 1.031  | 0.8817 | 0.2482 | 0.2221 | 0.1833 | 0.2636 | 0.3275 | 0.179  | 0.174  | 0.1619 |
| 16.25 | 1.1316 | 1.0487 | 0.8996 | 0.2526 | 0.2251 | 0.1842 | 0.2664 | 0.3312 | 0.1804 | 0.1757 | 0.1624 |
| 16.5  | 1.1443 | 1.0637 | 0.9165 | 0.2563 | 0.2285 | 0.1881 | 0.2694 | 0.3343 | 0.1818 | 0.1771 | 0.1639 |
| 16.75 | 1.1579 | 1.0806 | 0.9342 | 0.2596 | 0.232  | 0.1888 | 0.2723 | 0.3363 | 0.1842 | 0.1779 | 0.1639 |
| 17    | 1.1715 | 1.0952 | 0.9517 | 0.2631 | 0.2344 | 0.1888 | 0.2756 | 0.3398 | 0.1861 | 0.1805 | 0.1643 |
| 17.25 | 1.1858 | 1.1114 | 0.9682 | 0.2683 | 0.2383 | 0.1915 | 0.2782 | 0.3426 | 0.1868 | 0.1816 | 0.1657 |
| 17.5  | 1.2004 | 1.1256 | 0.9855 | 0.2726 | 0.2408 | 0.1925 | 0.2818 | 0.3462 | 0.1885 | 0.183  | 0.1673 |
| 17.75 | 1.2123 | 1.1388 | 1.0016 | 0.2781 | 0.2444 | 0.1951 | 0.2852 | 0.3483 | 0.1899 | 0.1826 | 0.1689 |
| 18    | 1.2261 | 1.1522 | 1.015  | 0.2822 | 0.2469 | 0.1973 | 0.2884 | 0.3511 | 0.1893 | 0.182  | 0.1663 |
| 18.25 | 1.239  | 1.1664 | 1.0307 | 0.2879 | 0.2508 | 0.1971 | 0.2913 | 0.3536 | 0.191  | 0.1838 | 0.1672 |

|       |        |        |        |        |        |        |        |        |        |        |        |
|-------|--------|--------|--------|--------|--------|--------|--------|--------|--------|--------|--------|
| 18.5  | 1.251  | 1.1779 | 1.0478 | 0.2928 | 0.2535 | 0.2002 | 0.2948 | 0.3581 | 0.1925 | 0.1845 | 0.1671 |
| 18.75 | 1.2641 | 1.1907 | 1.0607 | 0.2969 | 0.2563 | 0.2017 | 0.2979 | 0.3607 | 0.1933 | 0.185  | 0.1688 |
| 19    | 1.2773 | 1.2018 | 1.0765 | 0.3047 | 0.2598 | 0.203  | 0.3011 | 0.364  | 0.1952 | 0.1866 | 0.169  |
| 19.25 | 1.2907 | 1.2145 | 1.0891 | 0.3104 | 0.2641 | 0.2058 | 0.3053 | 0.3673 | 0.1964 | 0.1884 | 0.1699 |
| 19.5  | 1.3032 | 1.2259 | 1.1041 | 0.316  | 0.2668 | 0.2073 | 0.3079 | 0.3709 | 0.1981 | 0.1897 | 0.1712 |
| 19.75 | 1.3141 | 1.239  | 1.1166 | 0.3221 | 0.2709 | 0.2088 | 0.3124 | 0.3742 | 0.1998 | 0.1902 | 0.1719 |
| 20    | 1.3251 | 1.2497 | 1.1283 | 0.3279 | 0.2733 | 0.2107 | 0.3168 | 0.3772 | 0.2013 | 0.1921 | 0.172  |
| 20.25 | 1.3374 | 1.2637 | 1.1419 | 0.3355 | 0.2778 | 0.2123 | 0.3212 | 0.3809 | 0.2026 | 0.1932 | 0.1728 |
| 20.5  | 1.3474 | 1.2743 | 1.1521 | 0.3415 | 0.282  | 0.2145 | 0.3255 | 0.385  | 0.2056 | 0.1946 | 0.1742 |
| 20.75 | 1.3589 | 1.2848 | 1.1637 | 0.3478 | 0.286  | 0.2151 | 0.3293 | 0.3882 | 0.2069 | 0.1964 | 0.1742 |
| 21    | 1.3704 | 1.2956 | 1.1744 | 0.3552 | 0.2887 | 0.218  | 0.3316 | 0.3918 | 0.2091 | 0.198  | 0.1755 |
| 21.25 | 1.3806 | 1.3083 | 1.1829 | 0.362  | 0.293  | 0.2196 | 0.3363 | 0.3957 | 0.2116 | 0.1987 | 0.1764 |
| 21.5  | 1.39   | 1.3184 | 1.1906 | 0.3695 | 0.2968 | 0.2219 | 0.3409 | 0.3989 | 0.2127 | 0.2006 | 0.1776 |
| 21.75 | 1.3999 | 1.3289 | 1.2037 | 0.3764 | 0.2998 | 0.2239 | 0.3454 | 0.4025 | 0.2146 | 0.2015 | 0.1775 |
| 22    | 1.4093 | 1.3395 | 1.2116 | 0.3845 | 0.3038 | 0.2261 | 0.3492 | 0.4053 | 0.2158 | 0.2033 | 0.1788 |
| 22.25 | 1.4189 | 1.3493 | 1.2223 | 0.3923 | 0.3075 | 0.2277 | 0.3537 | 0.4088 | 0.2174 | 0.2035 | 0.1795 |
| 22.5  | 1.4278 | 1.3589 | 1.2316 | 0.4009 | 0.3116 | 0.229  | 0.3576 | 0.4129 | 0.219  | 0.2051 | 0.1804 |
| 22.75 | 1.4356 | 1.369  | 1.2391 | 0.4081 | 0.315  | 0.2323 | 0.3624 | 0.4168 | 0.2207 | 0.206  | 0.1809 |
| 23    | 1.4425 | 1.3781 | 1.2485 | 0.4162 | 0.3196 | 0.2322 | 0.3662 | 0.4205 | 0.2229 | 0.208  | 0.1818 |
| 23.25 | 1.4488 | 1.3861 | 1.257  | 0.4244 | 0.3221 | 0.2343 | 0.3706 | 0.425  | 0.2243 | 0.2089 | 0.1824 |
| 23.5  | 1.4527 | 1.3947 | 1.2667 | 0.4325 | 0.3263 | 0.2347 | 0.376  | 0.4274 | 0.2253 | 0.2105 | 0.1838 |
| 23.75 | 1.4559 | 1.4037 | 1.2752 | 0.4427 | 0.3295 | 0.235  | 0.38   | 0.4314 | 0.2276 | 0.2116 | 0.1838 |
| 24    | 1.4583 | 1.4119 | 1.2845 | 0.4516 | 0.3328 | 0.2372 | 0.3856 | 0.4351 | 0.2289 | 0.2129 | 0.1845 |
| 24.25 | 1.4609 | 1.4188 | 1.2937 | 0.4608 | 0.3363 | 0.2392 | 0.3899 | 0.4388 | 0.2311 | 0.2133 | 0.1853 |
| 24.5  | 1.4615 | 1.4276 | 1.3014 | 0.4695 | 0.3392 | 0.2405 | 0.3951 | 0.4431 | 0.2327 | 0.215  | 0.1863 |
| 24.75 | 1.4635 | 1.4341 | 1.3101 | 0.4794 | 0.343  | 0.2415 | 0.4001 | 0.4469 | 0.2358 | 0.2168 | 0.1865 |
| 25    | 1.466  | 1.4379 | 1.3177 | 0.4887 | 0.3479 | 0.2427 | 0.405  | 0.4501 | 0.2368 | 0.2175 | 0.1878 |
| 25.25 | 1.4669 | 1.4431 | 1.3269 | 0.4984 | 0.354  | 0.2492 | 0.4097 | 0.4535 | 0.2387 | 0.2194 | 0.1892 |
| 25.5  | 1.4687 | 1.4476 | 1.3358 | 0.5079 | 0.3592 | 0.2519 | 0.4157 | 0.4575 | 0.2406 | 0.2209 | 0.1895 |
| 25.75 | 1.4687 | 1.4518 | 1.345  | 0.5189 | 0.362  | 0.2549 | 0.4224 | 0.4617 | 0.2414 | 0.2222 | 0.1905 |
| 26    | 1.4682 | 1.453  | 1.3526 | 0.5237 | 0.3635 | 0.2508 | 0.4233 | 0.4609 | 0.2409 | 0.2213 | 0.1911 |
| 26.25 | 1.4704 | 1.4557 | 1.3577 | 0.5346 | 0.367  | 0.2531 | 0.4284 | 0.4643 | 0.2421 | 0.2226 | 0.1924 |
| 26.5  | 1.4702 | 1.4595 | 1.368  | 0.5451 | 0.37   | 0.2552 | 0.4338 | 0.4689 | 0.2431 | 0.2246 | 0.1925 |
| 26.75 | 1.4706 | 1.4619 | 1.3756 | 0.5558 | 0.375  | 0.2565 | 0.4396 | 0.4739 | 0.2463 | 0.2259 | 0.1934 |
| 27    | 1.4716 | 1.4639 | 1.3808 | 0.5667 | 0.38   | 0.2593 | 0.4467 | 0.4785 | 0.2474 | 0.2277 | 0.1936 |
| 27.25 | 1.4725 | 1.4677 | 1.3894 | 0.5789 | 0.385  | 0.2608 | 0.4534 | 0.4828 | 0.251  | 0.2292 | 0.1952 |
| 27.5  | 1.473  | 1.4709 | 1.396  | 0.5894 | 0.3892 | 0.2641 | 0.4584 | 0.486  | 0.252  | 0.2298 | 0.1952 |
| 27.75 | 1.4747 | 1.4735 | 1.4025 | 0.6005 | 0.3942 | 0.266  | 0.4658 | 0.4905 | 0.2549 | 0.2319 | 0.1965 |
| 28    | 1.4747 | 1.4758 | 1.4095 | 0.612  | 0.3996 | 0.2678 | 0.4727 | 0.4956 | 0.2565 | 0.2328 | 0.197  |
| 28.25 | 1.4772 | 1.4784 | 1.4156 | 0.6243 | 0.4062 | 0.2724 | 0.4802 | 0.5001 | 0.2592 | 0.2344 | 0.1987 |
| 28.5  | 1.4758 | 1.4806 | 1.4201 | 0.6342 | 0.412  | 0.275  | 0.4877 | 0.5054 | 0.2604 | 0.2355 | 0.1986 |
| 28.75 | 1.4763 | 1.4813 | 1.4239 | 0.6483 | 0.419  | 0.2776 | 0.4953 | 0.511  | 0.2632 | 0.237  | 0.1989 |



|       |        |        |        |        |        |        |        |        |        |        |        |
|-------|--------|--------|--------|--------|--------|--------|--------|--------|--------|--------|--------|
| 29    | 1.4771 | 1.4829 | 1.4289 | 0.6593 | 0.4247 | 0.2803 | 0.5028 | 0.5164 | 0.2672 | 0.2389 | 0.2006 |
| 29.25 | 1.4786 | 1.485  | 1.4341 | 0.6696 | 0.4299 | 0.2834 | 0.5109 | 0.5205 | 0.269  | 0.2402 | 0.2015 |
| 29.5  | 1.4803 | 1.4861 | 1.4367 | 0.6825 | 0.435  | 0.2839 | 0.5188 | 0.5267 | 0.2724 | 0.2411 | 0.2016 |
| 29.75 | 1.4807 | 1.4866 | 1.4387 | 0.6939 | 0.4414 | 0.2869 | 0.5262 | 0.5307 | 0.2746 | 0.2449 | 0.2026 |
| 30    | 1.4823 | 1.4892 | 1.4412 | 0.706  | 0.4459 | 0.2899 | 0.5333 | 0.537  | 0.2778 | 0.2452 | 0.2035 |
| 30.25 | 1.4831 | 1.49   | 1.4444 | 0.7126 | 0.4476 | 0.2866 | 0.5374 | 0.5357 | 0.2755 | 0.2451 | 0.2043 |
| 30.5  | 1.4829 | 1.4913 | 1.4444 | 0.7238 | 0.4527 | 0.2877 | 0.5446 | 0.5389 | 0.2776 | 0.2467 | 0.206  |
| 30.75 | 1.4823 | 1.4923 | 1.4446 | 0.7365 | 0.4575 | 0.2893 | 0.5528 | 0.5445 | 0.2797 | 0.2484 | 0.2057 |
| 31    | 1.4825 | 1.4929 | 1.4466 | 0.7455 | 0.4627 | 0.2922 | 0.5602 | 0.5485 | 0.2815 | 0.2492 | 0.2068 |
| 31.25 | 1.4843 | 1.4939 | 1.448  | 0.756  | 0.4687 | 0.2939 | 0.5688 | 0.5545 | 0.2844 | 0.2511 | 0.2079 |
| 31.5  | 1.4842 | 1.496  | 1.4475 | 0.7661 | 0.4745 | 0.2982 | 0.5769 | 0.5596 | 0.2867 | 0.2529 | 0.2078 |
| 31.75 | 1.4837 | 1.4956 | 1.4475 | 0.7779 | 0.4828 | 0.2997 | 0.5856 | 0.565  | 0.29   | 0.2534 | 0.2088 |
| 32    | 1.4837 | 1.4964 | 1.4488 | 0.7884 | 0.4888 | 0.3027 | 0.5942 | 0.5706 | 0.292  | 0.2542 | 0.2101 |
| 32.25 | 1.4847 | 1.4969 | 1.4483 | 0.7998 | 0.4967 | 0.3051 | 0.6028 | 0.5764 | 0.2965 | 0.2575 | 0.2117 |
| 32.5  | 1.4848 | 1.4964 | 1.448  | 0.8121 | 0.5025 | 0.3084 | 0.6127 | 0.5826 | 0.2983 | 0.2577 | 0.2116 |
| 32.75 | 1.4858 | 1.4974 | 1.448  | 0.8221 | 0.5085 | 0.3109 | 0.621  | 0.5873 | 0.3013 | 0.2603 | 0.2126 |
| 33    | 1.4867 | 1.4992 | 1.4467 | 0.8327 | 0.5149 | 0.3149 | 0.6305 | 0.5921 | 0.3034 | 0.2619 | 0.2137 |
| 33.25 | 1.4876 | 1.498  | 1.4476 | 0.8422 | 0.5202 | 0.3171 | 0.6376 | 0.5975 | 0.3067 | 0.2632 | 0.2146 |
| 33.5  | 1.4885 | 1.4993 | 1.4481 | 0.8515 | 0.5269 | 0.3196 | 0.6461 | 0.6027 | 0.3081 | 0.2644 | 0.2153 |
| 33.75 | 1.4883 | 1.4994 | 1.4469 | 0.8613 | 0.5338 | 0.3214 | 0.6552 | 0.6075 | 0.3116 | 0.2669 | 0.2151 |
| 34    | 1.4888 | 1.4988 | 1.4474 | 0.8715 | 0.54   | 0.3244 | 0.6645 | 0.6129 | 0.3146 | 0.2661 | 0.216  |
| 34.25 | 1.4892 | 1.4995 | 1.4471 | 0.8823 | 0.5462 | 0.3261 | 0.6721 | 0.6184 | 0.3166 | 0.2687 | 0.2166 |
| 34.5  | 1.4899 | 1.4996 | 1.4474 | 0.8919 | 0.553  | 0.3296 | 0.6815 | 0.6252 | 0.3201 | 0.2697 | 0.2186 |
| 34.75 | 1.4919 | 1.5003 | 1.4472 | 0.9034 | 0.5607 | 0.3313 | 0.6893 | 0.6275 | 0.3227 | 0.2725 | 0.2185 |
| 35    | 1.492  | 1.5014 | 1.4486 | 0.913  | 0.5659 | 0.3344 | 0.6985 | 0.6335 | 0.3252 | 0.2737 | 0.2196 |
| 35.25 | 1.4922 | 1.502  | 1.4486 | 0.9229 | 0.5716 | 0.3364 | 0.7067 | 0.6382 | 0.3281 | 0.2745 | 0.22   |
| 35.5  | 1.4933 | 1.5004 | 1.4477 | 0.9325 | 0.5793 | 0.3387 | 0.7151 | 0.6437 | 0.3308 | 0.2761 | 0.2206 |
| 35.75 | 1.4939 | 1.5019 | 1.4479 | 0.9406 | 0.5838 | 0.3418 | 0.724  | 0.648  | 0.3324 | 0.2769 | 0.2207 |
| 36    | 1.4951 | 1.5018 | 1.4476 | 0.951  | 0.5902 | 0.3444 | 0.732  | 0.6543 | 0.3358 | 0.2785 | 0.2219 |
| 36.25 | 1.4965 | 1.5015 | 1.4469 | 0.9635 | 0.5975 | 0.3471 | 0.7414 | 0.6596 | 0.3387 | 0.2798 | 0.2223 |
| 36.5  | 1.4976 | 1.5021 | 1.4473 | 0.972  | 0.6037 | 0.3493 | 0.7516 | 0.665  | 0.3412 | 0.2809 | 0.2237 |
| 36.75 | 1.4983 | 1.5037 | 1.4481 | 0.9808 | 0.6083 | 0.3494 | 0.7573 | 0.6678 | 0.3407 | 0.282  | 0.2238 |
| 37    | 1.4992 | 1.5034 | 1.4477 | 0.9885 | 0.6137 | 0.3495 | 0.7642 | 0.6697 | 0.3423 | 0.2819 | 0.2252 |
| 37.25 | 1.4997 | 1.504  | 1.449  | 0.9989 | 0.6199 | 0.3511 | 0.7729 | 0.6758 | 0.3457 | 0.2835 | 0.2254 |
| 37.5  | 1.5011 | 1.5037 | 1.4489 | 1.0103 | 0.6257 | 0.355  | 0.7823 | 0.68   | 0.3477 | 0.2849 | 0.2261 |
| 37.75 | 1.502  | 1.505  | 1.4486 | 1.018  | 0.634  | 0.356  | 0.7902 | 0.6849 | 0.3512 | 0.2868 | 0.2272 |
| 38    | 1.5029 | 1.5047 | 1.4475 | 1.0296 | 0.6396 | 0.3595 | 0.7974 | 0.6902 | 0.3546 | 0.2878 | 0.2286 |
| 38.25 | 1.5029 | 1.5046 | 1.449  | 1.0401 | 0.647  | 0.361  | 0.8062 | 0.6961 | 0.3574 | 0.2896 | 0.2287 |
| 38.5  | 1.504  | 1.505  | 1.4481 | 1.0504 | 0.6551 | 0.3639 | 0.8161 | 0.702  | 0.3602 | 0.2916 | 0.2293 |
| 38.75 | 1.5035 | 1.5042 | 1.448  | 1.0613 | 0.6612 | 0.3682 | 0.8258 | 0.707  | 0.3633 | 0.2921 | 0.2291 |
| 39    | 1.5042 | 1.505  | 1.4488 | 1.0711 | 0.6695 | 0.3711 | 0.8352 | 0.7129 | 0.3662 | 0.2938 | 0.2311 |
| 39.25 | 1.5058 | 1.5049 | 1.4482 | 1.0813 | 0.6765 | 0.3733 | 0.8448 | 0.718  | 0.3703 | 0.2952 | 0.2317 |

|       |        |        |        |        |        |        |        |        |        |        |        |
|-------|--------|--------|--------|--------|--------|--------|--------|--------|--------|--------|--------|
| 39.5  | 1.507  | 1.5052 | 1.4485 | 1.0908 | 0.6839 | 0.3778 | 0.8549 | 0.7245 | 0.3726 | 0.2953 | 0.2327 |
| 39.75 | 1.5073 | 1.506  | 1.4484 | 1.0996 | 0.6916 | 0.3802 | 0.864  | 0.7293 | 0.3761 | 0.2974 | 0.2325 |
| 40    | 1.5077 | 1.5062 | 1.4489 | 1.1118 | 0.699  | 0.3841 | 0.8732 | 0.7361 | 0.379  | 0.2984 | 0.233  |
| 40.25 | 1.5093 | 1.5063 | 1.4496 | 1.1184 | 0.7073 | 0.3863 | 0.883  | 0.7416 | 0.3825 | 0.3002 | 0.2341 |
| 40.5  | 1.5096 | 1.506  | 1.4489 | 1.1278 | 0.7135 | 0.3892 | 0.8924 | 0.7458 | 0.3862 | 0.3009 | 0.235  |
| 40.75 | 1.5108 | 1.5059 | 1.4494 | 1.1371 | 0.7211 | 0.3925 | 0.9018 | 0.7535 | 0.3894 | 0.3031 | 0.2359 |
| 41    | 1.5129 | 1.5053 | 1.4485 | 1.1472 | 0.7281 | 0.3953 | 0.9105 | 0.7572 | 0.3924 | 0.3035 | 0.236  |
| 41.25 | 1.5127 | 1.5048 | 1.4491 | 1.1542 | 0.7357 | 0.3975 | 0.9192 | 0.7632 | 0.3955 | 0.3044 | 0.2368 |
| 41.5  | 1.513  | 1.5052 | 1.4495 | 1.1608 | 0.7421 | 0.4011 | 0.93   | 0.7669 | 0.399  | 0.3072 | 0.2374 |
| 41.75 | 1.513  | 1.5045 | 1.4496 | 1.1675 | 0.7501 | 0.4029 | 0.939  | 0.7732 | 0.4026 | 0.307  | 0.2383 |
| 42    | 1.5143 | 1.506  | 1.4492 | 1.1733 | 0.7557 | 0.4076 | 0.9492 | 0.7792 | 0.4063 | 0.3081 | 0.2388 |
| 42.25 | 1.5164 | 1.506  | 1.4512 | 1.1798 | 0.7632 | 0.4104 | 0.9576 | 0.7841 | 0.4084 | 0.3092 | 0.2392 |
| 42.5  | 1.5166 | 1.5062 | 1.4516 | 1.1838 | 0.7693 | 0.4142 | 0.9677 | 0.7903 | 0.4116 | 0.312  | 0.2399 |
| 42.75 | 1.518  | 1.506  | 1.4518 | 1.1876 | 0.7772 | 0.4166 | 0.9778 | 0.7963 | 0.4165 | 0.3124 | 0.241  |
| 43    | 1.5154 | 1.5053 | 1.4522 | 1.1905 | 0.785  | 0.4193 | 0.9876 | 0.8012 | 0.419  | 0.3145 | 0.2413 |
| 43.25 | 1.5129 | 1.5059 | 1.4522 | 1.1934 | 0.793  | 0.4218 | 0.9971 | 0.8067 | 0.4241 | 0.3146 | 0.2413 |
| 43.5  | 1.5111 | 1.5064 | 1.4527 | 1.197  | 0.8003 | 0.4251 | 1.0076 | 0.8127 | 0.4271 | 0.3153 | 0.2422 |
| 43.75 | 1.5114 | 1.5084 | 1.453  | 1.1978 | 0.8071 | 0.4287 | 1.0175 | 0.8189 | 0.4314 | 0.3182 | 0.2443 |
| 44    | 1.5125 | 1.5078 | 1.4529 | 1.1981 | 0.8177 | 0.431  | 1.0282 | 0.8236 | 0.4343 | 0.3177 | 0.2436 |
| 44.25 | 1.5102 | 1.5073 | 1.4529 | 1.1994 | 0.8219 | 0.4353 | 1.0364 | 0.8287 | 0.4391 | 0.3189 | 0.2445 |
| 44.5  | 1.5105 | 1.5065 | 1.4523 | 1.2012 | 0.8294 | 0.4379 | 1.0464 | 0.8349 | 0.4428 | 0.3215 | 0.2453 |
| 44.75 | 1.5104 | 1.5065 | 1.454  | 1.2018 | 0.8363 | 0.4426 | 1.0553 | 0.8415 | 0.4454 | 0.3225 | 0.2456 |
| 45    | 1.5092 | 1.5064 | 1.4543 | 1.2031 | 0.8446 | 0.4445 | 1.0661 | 0.8463 | 0.4497 | 0.3239 | 0.2461 |
| 45.25 | 1.5105 | 1.5057 | 1.4541 | 1.2035 | 0.8515 | 0.449  | 1.0751 | 0.852  | 0.4546 | 0.3258 | 0.2479 |
| 45.5  | 1.5103 | 1.5065 | 1.4557 | 1.2039 | 0.8611 | 0.4517 | 1.0856 | 0.8578 | 0.4582 | 0.326  | 0.2479 |
| 45.75 | 1.51   | 1.5067 | 1.4559 | 1.2046 | 0.8673 | 0.4553 | 1.0941 | 0.8635 | 0.462  | 0.3273 | 0.2485 |
| 46    | 1.5108 | 1.5061 | 1.4561 | 1.2058 | 0.8743 | 0.4592 | 1.1049 | 0.8701 | 0.466  | 0.3289 | 0.2487 |
| 46.25 | 1.5109 | 1.5064 | 1.456  | 1.2044 | 0.8818 | 0.4629 | 1.1136 | 0.8759 | 0.4691 | 0.3301 | 0.2498 |
| 46.5  | 1.511  | 1.5069 | 1.4571 | 1.2055 | 0.8901 | 0.4668 | 1.1231 | 0.8806 | 0.4733 | 0.3315 | 0.2499 |
| 46.75 | 1.511  | 1.5052 | 1.4577 | 1.2055 | 0.8972 | 0.47   | 1.133  | 0.886  | 0.4783 | 0.3325 | 0.2504 |
| 47    | 1.5111 | 1.5059 | 1.4574 | 1.2064 | 0.9046 | 0.4738 | 1.1427 | 0.8915 | 0.4817 | 0.3334 | 0.252  |
| 47.25 | 1.5102 | 1.5042 | 1.4571 | 1.2061 | 0.9106 | 0.4781 | 1.1506 | 0.8979 | 0.4861 | 0.3357 | 0.2523 |
| 47.5  | 1.5112 | 1.5044 | 1.4583 | 1.2061 | 0.9176 | 0.4813 | 1.1605 | 0.9053 | 0.4898 | 0.3366 | 0.2522 |
| 47.75 | 1.5109 | 1.5036 | 1.4575 | 1.2071 | 0.9276 | 0.4863 | 1.17   | 0.9097 | 0.4944 | 0.3372 | 0.2543 |
| 48    | 1.511  | 1.5046 | 1.4582 | 1.2073 | 0.9345 | 0.4889 | 1.1774 | 0.9154 | 0.4981 | 0.3398 | 0.2535 |
| 48.25 | 1.511  | 1.5042 | 1.4587 | 1.2071 | 0.9418 | 0.4925 | 1.1872 | 0.9215 | 0.502  | 0.3412 | 0.2545 |
| 48.5  | 1.5111 | 1.504  | 1.4592 | 1.2072 | 0.9501 | 0.4971 | 1.1948 | 0.9263 | 0.5071 | 0.342  | 0.2549 |
| 48.75 | 1.5107 | 1.5019 | 1.4578 | 1.2059 | 0.9573 | 0.501  | 1.2044 | 0.9318 | 0.5106 | 0.3421 | 0.2558 |
| 49    | 1.5112 | 1.5026 | 1.4586 | 1.2057 | 0.967  | 0.505  | 1.2129 | 0.9376 | 0.5152 | 0.3435 | 0.2569 |
| 49.25 | 1.5109 | 1.5034 | 1.4604 | 1.2059 | 0.9745 | 0.5088 | 1.2213 | 0.9427 | 0.5195 | 0.3445 | 0.257  |
| 49.5  | 1.5094 | 1.504  | 1.4603 | 1.2062 | 0.9832 | 0.513  | 1.2305 | 0.9483 | 0.5249 | 0.3466 | 0.2573 |
| 49.75 | 1.5105 | 1.5038 | 1.4602 | 1.206  | 0.9911 | 0.5155 | 1.236  | 0.9543 | 0.5289 | 0.3486 | 0.2581 |

- ◆ WT
- WT(GA 3)
- ▲ WT(RAD 3)
- × NO DRUG
- × GA 3uM
- GA 7uM
- + NOVO 100
- NOVO 250
- RAD 3

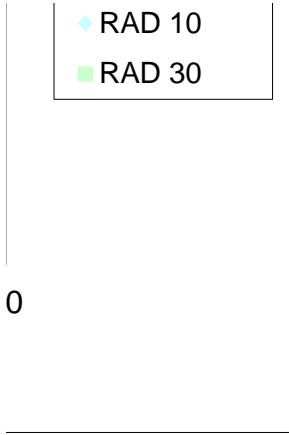

E9 E10 E11 E12 E13 E14 E15 E16

| TIME | WT     | WT(GA 3) | WT(RAD 3) | NO DRUG | GA 3uM | GA 7uM | NOVO 10 | NOVO 250 | RAD 3  | RAD 10 | RAD 30 |
|------|--------|----------|-----------|---------|--------|--------|---------|----------|--------|--------|--------|
| 0    | 0.1894 | 0.2051   | 0.1892    | 0.1742  | 0.1793 | 0.1656 | 0.2009  | 0.2417   | 0.1383 | 0.147  | 0.1522 |
| 0.25 | 0.1844 | 0.1929   | 0.1812    | 0.1658  | 0.1704 | 0.1531 | 0.2025  | 0.2415   | 0.1301 | 0.1338 | 0.1407 |
| 0.5  | 0.1833 | 0.1912   | 0.1787    | 0.1641  | 0.1684 | 0.1517 | 0.204   | 0.2437   | 0.1276 | 0.1303 | 0.1382 |
| 0.75 | 0.1838 | 0.189    | 0.1758    | 0.161   | 0.1664 | 0.1503 | 0.203   | 0.2458   | 0.1274 | 0.1294 | 0.1367 |
| 1    | 0.1843 | 0.1877   | 0.1818    | 0.1621  | 0.1662 | 0.1486 | 0.2018  | 0.2473   | 0.127  | 0.1281 | 0.1366 |
| 1.25 | 0.1867 | 0.1862   | 0.1836    | 0.1627  | 0.1671 | 0.1495 | 0.2028  | 0.2465   | 0.1276 | 0.1289 | 0.1361 |

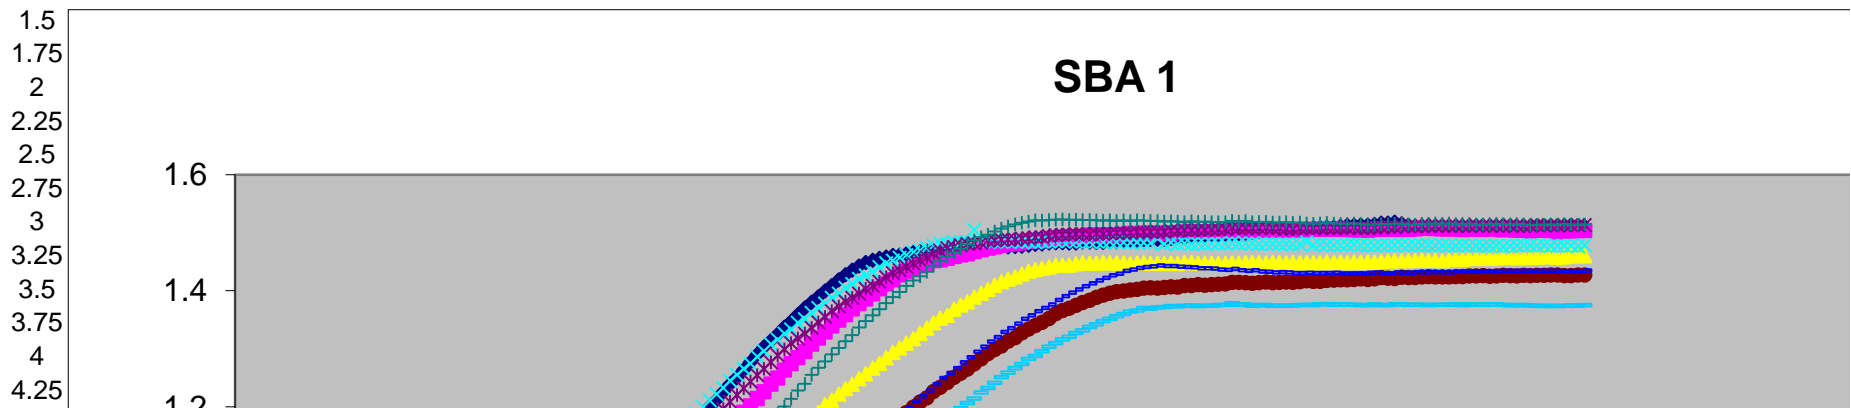

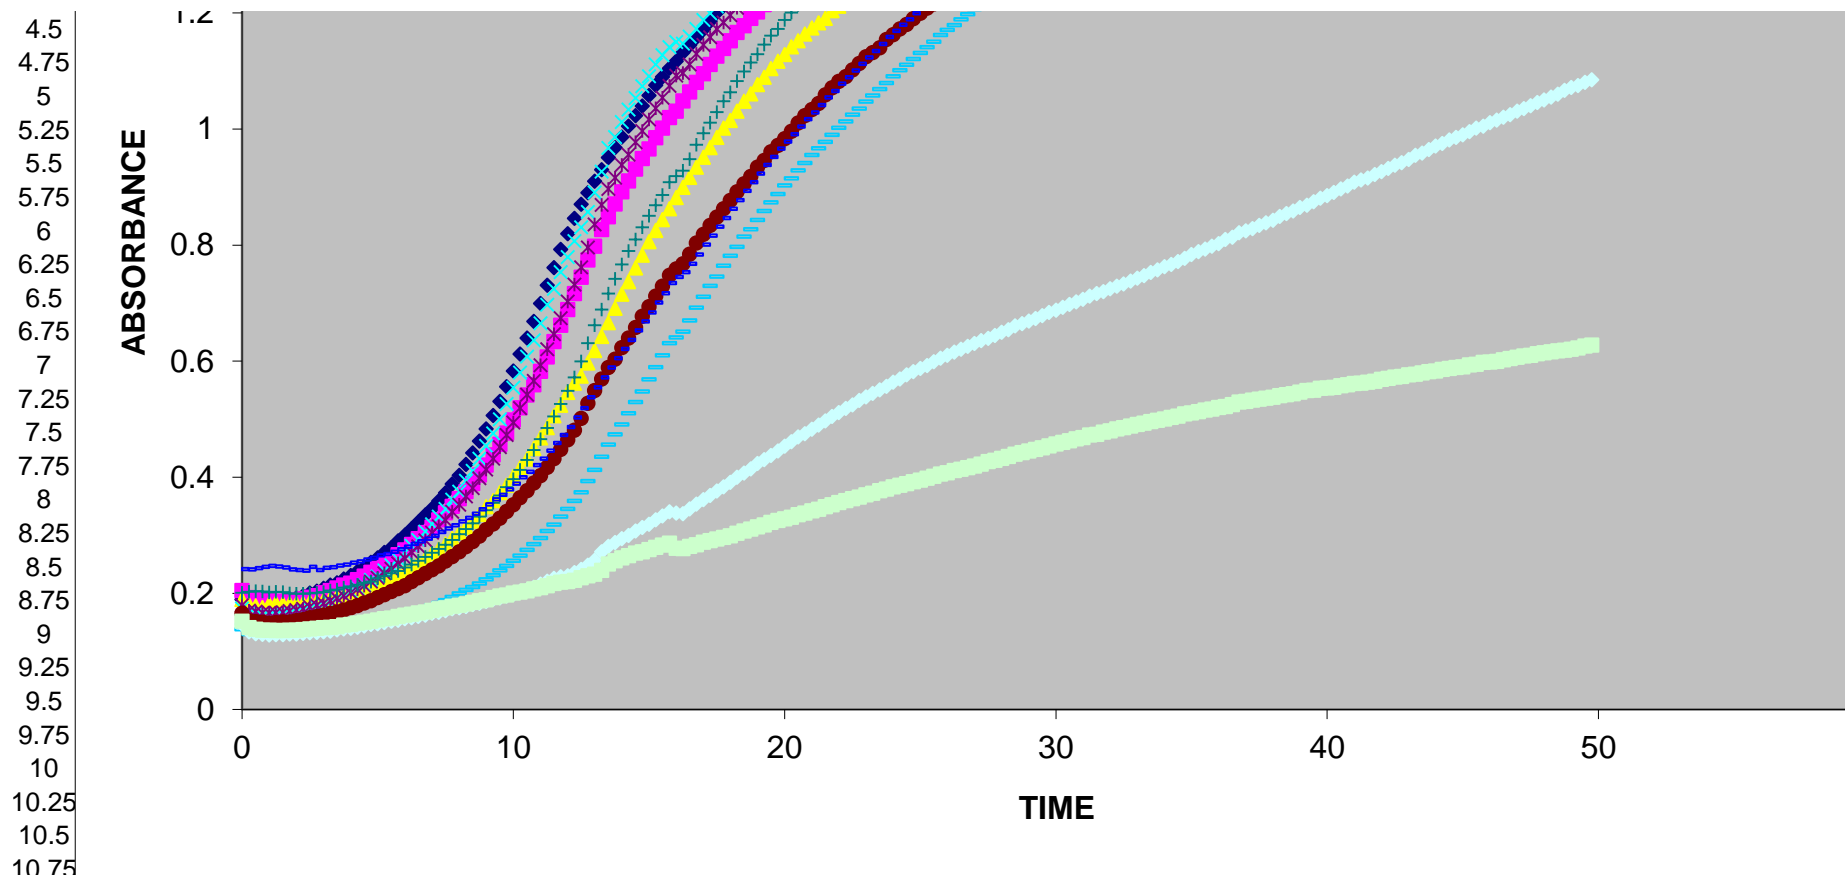

|       |        |        |        |        |        |        |        |        |        |        |        |
|-------|--------|--------|--------|--------|--------|--------|--------|--------|--------|--------|--------|
| 11    | 0.6992 | 0.5825 | 0.4678 | 0.6652 | 0.593  | 0.4031 | 0.4657 | 0.4323 | 0.2951 | 0.2158 | 0.2099 |
| 11.25 | 0.7307 | 0.6075 | 0.4857 | 0.697  | 0.6205 | 0.417  | 0.4848 | 0.4461 | 0.3074 | 0.2209 | 0.2132 |
| 11.5  | 0.7614 | 0.6339 | 0.5059 | 0.7251 | 0.6466 | 0.4323 | 0.5049 | 0.4592 | 0.3183 | 0.2257 | 0.2171 |
| 11.75 | 0.7927 | 0.6618 | 0.5242 | 0.7533 | 0.6741 | 0.4482 | 0.5265 | 0.4726 | 0.3321 | 0.2287 | 0.219  |
| 12    | 0.8194 | 0.6889 | 0.5464 | 0.7795 | 0.7026 | 0.4645 | 0.5492 | 0.4869 | 0.3456 | 0.2305 | 0.2204 |
| 12.25 | 0.8459 | 0.7168 | 0.5622 | 0.8068 | 0.7318 | 0.4812 | 0.5723 | 0.5033 | 0.3591 | 0.2357 | 0.2227 |
| 12.5  | 0.8706 | 0.7448 | 0.5743 | 0.8306 | 0.762  | 0.5016 | 0.5997 | 0.5191 | 0.3744 | 0.2413 | 0.227  |
| 12.75 | 0.8904 | 0.7744 | 0.5968 | 0.8574 | 0.7962 | 0.5276 | 0.631  | 0.538  | 0.3932 | 0.2482 | 0.2302 |
| 13    | 0.9099 | 0.7982 | 0.6186 | 0.8907 | 0.8354 | 0.5496 | 0.6619 | 0.5551 | 0.4129 | 0.2567 | 0.2331 |
| 13.25 | 0.9301 | 0.8269 | 0.6426 | 0.9269 | 0.8693 | 0.5694 | 0.6892 | 0.5721 | 0.4356 | 0.2716 | 0.2396 |
| 13.5  | 0.9508 | 0.849  | 0.6665 | 0.9676 | 0.8967 | 0.589  | 0.7164 | 0.5893 | 0.4565 | 0.2809 | 0.2508 |
| 13.75 | 0.9679 | 0.8707 | 0.6913 | 0.9864 | 0.916  | 0.6037 | 0.7418 | 0.6053 | 0.474  | 0.2874 | 0.2561 |
| 14    | 0.986  | 0.8918 | 0.7152 | 1.012  | 0.9381 | 0.6235 | 0.7665 | 0.6212 | 0.4913 | 0.294  | 0.2612 |
| 14.25 | 1.0047 | 0.9106 | 0.7372 | 1.0335 | 0.9561 | 0.6398 | 0.7897 | 0.6366 | 0.5103 | 0.2998 | 0.2651 |
| 14.5  | 1.0233 | 0.9308 | 0.7608 | 1.0532 | 0.9776 | 0.658  | 0.8095 | 0.6534 | 0.5294 | 0.3073 | 0.2692 |
| 14.75 | 1.0397 | 0.9491 | 0.7825 | 1.0738 | 0.9964 | 0.6772 | 0.8306 | 0.6687 | 0.5478 | 0.3133 | 0.2718 |

|       |        |        |        |        |        |        |        |        |        |        |        |
|-------|--------|--------|--------|--------|--------|--------|--------|--------|--------|--------|--------|
| 15    | 1.0577 | 0.966  | 0.8057 | 1.0911 | 1.0164 | 0.6937 | 0.8505 | 0.684  | 0.5686 | 0.3191 | 0.2755 |
| 15.25 | 1.0753 | 0.9853 | 0.8251 | 1.1115 | 1.0359 | 0.7119 | 0.8686 | 0.7011 | 0.5899 | 0.3266 | 0.2792 |
| 15.5  | 1.0897 | 1.0015 | 0.8439 | 1.1273 | 1.0539 | 0.7292 | 0.8865 | 0.7169 | 0.6103 | 0.3333 | 0.283  |
| 15.75 | 1.1049 | 1.0198 | 0.8628 | 1.1413 | 1.0742 | 0.7479 | 0.9083 | 0.7346 | 0.6313 | 0.3404 | 0.2867 |
| 16    | 1.1171 | 1.031  | 0.8817 | 1.1499 | 1.0919 | 0.7588 | 0.9187 | 0.7452 | 0.641  | 0.3384 | 0.2778 |
| 16.25 | 1.1316 | 1.0487 | 0.8996 | 1.1474 | 1.0964 | 0.7681 | 0.9282 | 0.7536 | 0.6512 | 0.3373 | 0.2769 |
| 16.5  | 1.1443 | 1.0637 | 0.9165 | 1.1595 | 1.1116 | 0.7842 | 0.948  | 0.7676 | 0.6705 | 0.3454 | 0.2812 |
| 16.75 | 1.1579 | 1.0806 | 0.9342 | 1.1726 | 1.1298 | 0.8039 | 0.9729 | 0.7841 | 0.6923 | 0.3535 | 0.284  |
| 17    | 1.1715 | 1.0952 | 0.9517 | 1.188  | 1.1452 | 0.8187 | 0.9926 | 0.8011 | 0.7111 | 0.3614 | 0.288  |
| 17.25 | 1.1858 | 1.1114 | 0.9682 | 1.1996 | 1.1583 | 0.8338 | 1.0111 | 0.8166 | 0.7296 | 0.3689 | 0.2907 |
| 17.5  | 1.2004 | 1.1256 | 0.9855 | 1.2111 | 1.1724 | 0.8485 | 1.0291 | 0.8318 | 0.7457 | 0.3764 | 0.2938 |
| 17.75 | 1.2123 | 1.1388 | 1.0016 | 1.2219 | 1.1833 | 0.8628 | 1.0477 | 0.8468 | 0.7645 | 0.3833 | 0.2966 |
| 18    | 1.2261 | 1.1522 | 1.015  | 1.2326 | 1.1963 | 0.8768 | 1.0636 | 0.8626 | 0.7815 | 0.3912 | 0.2994 |
| 18.25 | 1.239  | 1.1664 | 1.0307 | 1.2452 | 1.2087 | 0.8921 | 1.0826 | 0.8774 | 0.7972 | 0.4003 | 0.3037 |
| 18.5  | 1.251  | 1.1779 | 1.0478 | 1.255  | 1.2207 | 0.9058 | 1.0993 | 0.8938 | 0.8145 | 0.4073 | 0.3076 |
| 18.75 | 1.2641 | 1.1907 | 1.0607 | 1.2659 | 1.2319 | 0.9184 | 1.1145 | 0.9086 | 0.8276 | 0.4145 | 0.3109 |
| 19    | 1.2773 | 1.2018 | 1.0765 | 1.2746 | 1.2435 | 0.9343 | 1.1292 | 0.9232 | 0.8432 | 0.4239 | 0.3145 |
| 19.25 | 1.2907 | 1.2145 | 1.0891 | 1.2865 | 1.2546 | 0.946  | 1.1453 | 0.9381 | 0.8586 | 0.4303 | 0.3181 |
| 19.5  | 1.3032 | 1.2259 | 1.1041 | 1.2962 | 1.2657 | 0.961  | 1.1609 | 0.9519 | 0.8738 | 0.4377 | 0.3221 |
| 19.75 | 1.3141 | 1.239  | 1.1166 | 1.3082 | 1.2765 | 0.972  | 1.1726 | 0.9662 | 0.8878 | 0.4452 | 0.3256 |
| 20    | 1.3251 | 1.2497 | 1.1283 | 1.3159 | 1.2886 | 0.9832 | 1.1881 | 0.9784 | 0.9029 | 0.4537 | 0.3285 |
| 20.25 | 1.3374 | 1.2637 | 1.1419 | 1.3265 | 1.2994 | 0.9961 | 1.2006 | 0.9911 | 0.9149 | 0.4615 | 0.3314 |
| 20.5  | 1.3474 | 1.2743 | 1.1521 | 1.3333 | 1.3098 | 1.0107 | 1.2141 | 1.0045 | 0.9289 | 0.4695 | 0.3358 |
| 20.75 | 1.3589 | 1.2848 | 1.1637 | 1.3452 | 1.3179 | 1.0232 | 1.2282 | 1.0173 | 0.9413 | 0.4749 | 0.3385 |
| 21    | 1.3704 | 1.2956 | 1.1744 | 1.3512 | 1.3265 | 1.0334 | 1.24   | 1.0289 | 0.9552 | 0.4827 | 0.3423 |
| 21.25 | 1.3806 | 1.3083 | 1.1829 | 1.362  | 1.3363 | 1.0443 | 1.2551 | 1.0413 | 0.9667 | 0.4899 | 0.3451 |
| 21.5  | 1.39   | 1.3184 | 1.1906 | 1.3704 | 1.3458 | 1.0587 | 1.2673 | 1.0543 | 0.978  | 0.4973 | 0.3492 |
| 21.75 | 1.3999 | 1.3289 | 1.2037 | 1.3784 | 1.3548 | 1.071  | 1.2784 | 1.0657 | 0.9903 | 0.5048 | 0.3527 |
| 22    | 1.4093 | 1.3395 | 1.2116 | 1.3879 | 1.3649 | 1.0823 | 1.2904 | 1.0784 | 1.0021 | 0.5114 | 0.3565 |
| 22.25 | 1.4189 | 1.3493 | 1.2223 | 1.3953 | 1.3732 | 1.0904 | 1.3015 | 1.0894 | 1.0131 | 0.5185 | 0.36   |
| 22.5  | 1.4278 | 1.3589 | 1.2316 | 1.4052 | 1.3816 | 1.1018 | 1.3131 | 1.1009 | 1.0245 | 0.5245 | 0.3629 |
| 22.75 | 1.4356 | 1.369  | 1.2391 | 1.4121 | 1.3879 | 1.1129 | 1.3236 | 1.1127 | 1.0351 | 0.5324 | 0.366  |
| 23    | 1.4425 | 1.3781 | 1.2485 | 1.4204 | 1.3953 | 1.1248 | 1.3366 | 1.1235 | 1.0474 | 0.5384 | 0.3696 |
| 23.25 | 1.4488 | 1.3861 | 1.257  | 1.4266 | 1.4037 | 1.1316 | 1.3479 | 1.1345 | 1.058  | 0.5444 | 0.3726 |
| 23.5  | 1.4527 | 1.3947 | 1.2667 | 1.433  | 1.4085 | 1.1402 | 1.358  | 1.1465 | 1.0689 | 0.5507 | 0.3768 |
| 23.75 | 1.4559 | 1.4037 | 1.2752 | 1.4408 | 1.4156 | 1.1541 | 1.3681 | 1.159  | 1.0794 | 0.5564 | 0.3799 |
| 24    | 1.4583 | 1.4119 | 1.2845 | 1.4476 | 1.4232 | 1.1628 | 1.3786 | 1.169  | 1.0907 | 0.5639 | 0.3835 |
| 24.25 | 1.4609 | 1.4188 | 1.2937 | 1.4522 | 1.4303 | 1.1725 | 1.389  | 1.1797 | 1.1015 | 0.5693 | 0.3861 |
| 24.5  | 1.4615 | 1.4276 | 1.3014 | 1.4571 | 1.4356 | 1.1802 | 1.3981 | 1.1892 | 1.1107 | 0.5763 | 0.3888 |
| 24.75 | 1.4635 | 1.4341 | 1.3101 | 1.4615 | 1.4417 | 1.1904 | 1.4084 | 1.1995 | 1.1206 | 0.5821 | 0.3926 |
| 25    | 1.466  | 1.4379 | 1.3177 | 1.4662 | 1.447  | 1.1997 | 1.4178 | 1.2103 | 1.1312 | 0.5873 | 0.3953 |
| 25.25 | 1.4669 | 1.4431 | 1.3269 | 1.4696 | 1.4527 | 1.2081 | 1.4252 | 1.2184 | 1.1409 | 0.5925 | 0.3985 |

|       |        |        |        |        |        |        |        |        |        |        |        |
|-------|--------|--------|--------|--------|--------|--------|--------|--------|--------|--------|--------|
| 25.5  | 1.4687 | 1.4476 | 1.3358 | 1.4742 | 1.4577 | 1.2154 | 1.433  | 1.2283 | 1.1504 | 0.599  | 0.4015 |
| 25.75 | 1.4687 | 1.4518 | 1.345  | 1.4781 | 1.4642 | 1.2264 | 1.4431 | 1.2392 | 1.162  | 0.6052 | 0.4056 |
| 26    | 1.4682 | 1.453  | 1.3526 | 1.4819 | 1.4686 | 1.2336 | 1.4508 | 1.2497 | 1.1709 | 0.6102 | 0.408  |
| 26.25 | 1.4704 | 1.4557 | 1.3577 | 1.4809 | 1.4734 | 1.242  | 1.4593 | 1.2583 | 1.1789 | 0.6155 | 0.4116 |
| 26.5  | 1.4702 | 1.4595 | 1.368  | 1.4833 | 1.4758 | 1.2508 | 1.466  | 1.2666 | 1.189  | 0.6205 | 0.4141 |
| 26.75 | 1.4706 | 1.4619 | 1.3756 | 1.484  | 1.4783 | 1.2578 | 1.4726 | 1.2769 | 1.1981 | 0.6257 | 0.4169 |
| 27    | 1.4716 | 1.4639 | 1.3808 | 1.4847 | 1.4809 | 1.265  | 1.4803 | 1.2853 | 1.2069 | 0.6306 | 0.4195 |
| 27.25 | 1.4725 | 1.4677 | 1.3894 | 1.5049 | 1.4817 | 1.274  | 1.4867 | 1.2949 | 1.2144 | 0.6357 | 0.4229 |
| 27.5  | 1.473  | 1.4709 | 1.396  | 1.485  | 1.4831 | 1.2827 | 1.4922 | 1.3035 | 1.2249 | 0.6394 | 0.4273 |
| 27.75 | 1.4747 | 1.4735 | 1.4025 | 1.4844 | 1.4861 | 1.2916 | 1.4968 | 1.3124 | 1.2329 | 0.6446 | 0.4295 |
| 28    | 1.4747 | 1.4758 | 1.4095 | 1.4848 | 1.487  | 1.2988 | 1.5022 | 1.3203 | 1.2413 | 0.6498 | 0.4324 |
| 28.25 | 1.4772 | 1.4784 | 1.4156 | 1.4848 | 1.4879 | 1.3051 | 1.5071 | 1.3289 | 1.2513 | 0.6541 | 0.4359 |
| 28.5  | 1.4758 | 1.4806 | 1.4201 | 1.4851 | 1.4884 | 1.3129 | 1.5112 | 1.3359 | 1.2593 | 0.6608 | 0.4396 |
| 28.75 | 1.4763 | 1.4813 | 1.4239 | 1.4849 | 1.4879 | 1.3194 | 1.5144 | 1.3436 | 1.2668 | 0.6648 | 0.4424 |
| 29    | 1.4771 | 1.4829 | 1.4289 | 1.4839 | 1.4903 | 1.3275 | 1.5172 | 1.3516 | 1.2739 | 0.6691 | 0.4454 |
| 29.25 | 1.4786 | 1.485  | 1.4341 | 1.4848 | 1.4904 | 1.3339 | 1.5196 | 1.3578 | 1.2828 | 0.6736 | 0.448  |
| 29.5  | 1.4803 | 1.4861 | 1.4367 | 1.4837 | 1.4923 | 1.3403 | 1.5214 | 1.3647 | 1.288  | 0.6787 | 0.4509 |
| 29.75 | 1.4807 | 1.4866 | 1.4387 | 1.4848 | 1.4923 | 1.3457 | 1.5212 | 1.3705 | 1.2958 | 0.6839 | 0.454  |
| 30    | 1.4823 | 1.4892 | 1.4412 | 1.4846 | 1.4945 | 1.3523 | 1.5222 | 1.3768 | 1.3038 | 0.6881 | 0.4574 |
| 30.25 | 1.4831 | 1.49   | 1.4444 | 1.4854 | 1.4961 | 1.3603 | 1.5228 | 1.3842 | 1.31   | 0.6931 | 0.4604 |
| 30.5  | 1.4829 | 1.4913 | 1.4444 | 1.4863 | 1.4969 | 1.3658 | 1.5231 | 1.3909 | 1.3167 | 0.6977 | 0.4632 |
| 30.75 | 1.4823 | 1.4923 | 1.4446 | 1.4864 | 1.4965 | 1.3701 | 1.5223 | 1.3972 | 1.3209 | 0.7022 | 0.4661 |
| 31    | 1.4825 | 1.4929 | 1.4466 | 1.4845 | 1.498  | 1.3748 | 1.5229 | 1.4027 | 1.3276 | 0.7069 | 0.4686 |
| 31.25 | 1.4843 | 1.4939 | 1.448  | 1.4848 | 1.4979 | 1.3798 | 1.5221 | 1.4078 | 1.332  | 0.7122 | 0.4731 |
| 31.5  | 1.4842 | 1.496  | 1.4475 | 1.4846 | 1.497  | 1.3839 | 1.522  | 1.4128 | 1.3381 | 0.7163 | 0.4742 |
| 31.75 | 1.4837 | 1.4956 | 1.4475 | 1.4858 | 1.4984 | 1.3884 | 1.5215 | 1.4179 | 1.3425 | 0.7199 | 0.4779 |
| 32    | 1.4837 | 1.4964 | 1.4488 | 1.4839 | 1.498  | 1.3925 | 1.5212 | 1.4224 | 1.348  | 0.7247 | 0.4798 |
| 32.25 | 1.4847 | 1.4969 | 1.4483 | 1.4847 | 1.4987 | 1.3961 | 1.5214 | 1.4266 | 1.3517 | 0.729  | 0.4832 |
| 32.5  | 1.4848 | 1.4964 | 1.448  | 1.484  | 1.4993 | 1.3986 | 1.5204 | 1.4297 | 1.3559 | 0.7331 | 0.4858 |
| 32.75 | 1.4858 | 1.4974 | 1.448  | 1.4837 | 1.5002 | 1.3996 | 1.5214 | 1.4342 | 1.3599 | 0.7382 | 0.4885 |
| 33    | 1.4867 | 1.4992 | 1.4467 | 1.4828 | 1.4999 | 1.4011 | 1.5204 | 1.4364 | 1.3646 | 0.7428 | 0.491  |
| 33.25 | 1.4876 | 1.498  | 1.4476 | 1.4833 | 1.501  | 1.4026 | 1.5216 | 1.4396 | 1.3658 | 0.7475 | 0.4931 |
| 33.5  | 1.4885 | 1.4993 | 1.4481 | 1.483  | 1.5015 | 1.4048 | 1.5212 | 1.4413 | 1.3704 | 0.753  | 0.4962 |
| 33.75 | 1.4883 | 1.4994 | 1.4469 | 1.4823 | 1.5017 | 1.4054 | 1.5205 | 1.4421 | 1.3694 | 0.7573 | 0.4982 |
| 34    | 1.4888 | 1.4988 | 1.4474 | 1.4899 | 1.5018 | 1.4046 | 1.5203 | 1.4436 | 1.3718 | 0.7629 | 0.5002 |
| 34.25 | 1.4892 | 1.4995 | 1.4471 | 1.4809 | 1.5018 | 1.4058 | 1.5194 | 1.4425 | 1.3724 | 0.767  | 0.5033 |
| 34.5  | 1.4899 | 1.4996 | 1.4474 | 1.4828 | 1.5039 | 1.4067 | 1.5198 | 1.4427 | 1.3737 | 0.7716 | 0.5054 |
| 34.75 | 1.4919 | 1.5003 | 1.4472 | 1.4809 | 1.5031 | 1.4062 | 1.5194 | 1.4417 | 1.373  | 0.7772 | 0.5091 |
| 35    | 1.492  | 1.5014 | 1.4486 | 1.482  | 1.5049 | 1.4093 | 1.5183 | 1.4409 | 1.3746 | 0.7839 | 0.5109 |
| 35.25 | 1.4922 | 1.502  | 1.4486 | 1.481  | 1.5045 | 1.409  | 1.5197 | 1.4406 | 1.3751 | 0.7889 | 0.513  |
| 35.5  | 1.4933 | 1.5004 | 1.4477 | 1.4814 | 1.505  | 1.4108 | 1.5189 | 1.439  | 1.3739 | 0.7932 | 0.5158 |
| 35.75 | 1.4939 | 1.5019 | 1.4479 | 1.4808 | 1.5048 | 1.4096 | 1.5193 | 1.4386 | 1.3743 | 0.798  | 0.5176 |



|       |        |        |        |        |        |        |        |        |        |        |        |
|-------|--------|--------|--------|--------|--------|--------|--------|--------|--------|--------|--------|
| 36    | 1.4951 | 1.5018 | 1.4476 | 1.4817 | 1.5054 | 1.4105 | 1.5184 | 1.4383 | 1.3742 | 0.8026 | 0.5203 |
| 36.25 | 1.4965 | 1.5015 | 1.4469 | 1.4813 | 1.5061 | 1.4114 | 1.5185 | 1.4364 | 1.3755 | 0.81   | 0.5222 |
| 36.5  | 1.4976 | 1.5021 | 1.4473 | 1.4812 | 1.5063 | 1.4116 | 1.5182 | 1.4361 | 1.3759 | 0.8138 | 0.5252 |
| 36.75 | 1.4983 | 1.5037 | 1.4481 | 1.4831 | 1.509  | 1.4144 | 1.5206 | 1.4378 | 1.3789 | 0.8211 | 0.5298 |
| 37    | 1.4992 | 1.5034 | 1.4477 | 1.4815 | 1.5076 | 1.4147 | 1.5196 | 1.4358 | 1.3759 | 0.8246 | 0.5306 |
| 37.25 | 1.4997 | 1.504  | 1.449  | 1.4817 | 1.5078 | 1.4143 | 1.5202 | 1.4343 | 1.3764 | 0.8286 | 0.5329 |
| 37.5  | 1.5011 | 1.5037 | 1.4489 | 1.482  | 1.5076 | 1.4132 | 1.5182 | 1.4353 | 1.3746 | 0.8341 | 0.5348 |
| 37.75 | 1.502  | 1.505  | 1.4486 | 1.4803 | 1.5081 | 1.4142 | 1.519  | 1.4333 | 1.3756 | 0.8382 | 0.5363 |
| 38    | 1.5029 | 1.5047 | 1.4475 | 1.4811 | 1.5086 | 1.4149 | 1.5187 | 1.4327 | 1.3754 | 0.8431 | 0.538  |
| 38.25 | 1.5029 | 1.5046 | 1.449  | 1.4806 | 1.5078 | 1.414  | 1.5175 | 1.4317 | 1.3741 | 0.8493 | 0.5406 |
| 38.5  | 1.504  | 1.505  | 1.4481 | 1.4808 | 1.5083 | 1.4144 | 1.5179 | 1.4323 | 1.3741 | 0.8544 | 0.5421 |
| 38.75 | 1.5035 | 1.5042 | 1.448  | 1.4805 | 1.5069 | 1.4149 | 1.5181 | 1.4316 | 1.3746 | 0.8588 | 0.5439 |
| 39    | 1.5042 | 1.505  | 1.4488 | 1.4799 | 1.5069 | 1.4148 | 1.5169 | 1.4308 | 1.3748 | 0.8651 | 0.5468 |
| 39.25 | 1.5058 | 1.5049 | 1.4482 | 1.4801 | 1.5075 | 1.4159 | 1.5178 | 1.4306 | 1.3753 | 0.869  | 0.5495 |
| 39.5  | 1.507  | 1.5052 | 1.4485 | 1.4847 | 1.508  | 1.4173 | 1.5163 | 1.4312 | 1.376  | 0.8747 | 0.5503 |
| 39.75 | 1.5073 | 1.506  | 1.4484 | 1.4788 | 1.508  | 1.4163 | 1.5157 | 1.4304 | 1.3752 | 0.8806 | 0.5531 |
| 40    | 1.5077 | 1.5062 | 1.4489 | 1.4803 | 1.5081 | 1.4162 | 1.5163 | 1.4307 | 1.377  | 0.8853 | 0.5538 |
| 40.25 | 1.5093 | 1.5063 | 1.4496 | 1.4797 | 1.5086 | 1.418  | 1.5171 | 1.4308 | 1.377  | 0.8908 | 0.5552 |
| 40.5  | 1.5096 | 1.506  | 1.4489 | 1.4788 | 1.5085 | 1.4183 | 1.516  | 1.431  | 1.376  | 0.8969 | 0.5578 |
| 40.75 | 1.5108 | 1.5059 | 1.4494 | 1.4787 | 1.5084 | 1.419  | 1.5155 | 1.4301 | 1.3766 | 0.9016 | 0.5597 |
| 41    | 1.5129 | 1.5053 | 1.4485 | 1.4791 | 1.5084 | 1.4188 | 1.5156 | 1.43   | 1.3766 | 0.9082 | 0.5615 |
| 41.25 | 1.5127 | 1.5048 | 1.4491 | 1.48   | 1.5094 | 1.4195 | 1.5159 | 1.4302 | 1.376  | 0.9125 | 0.5622 |
| 41.5  | 1.513  | 1.5052 | 1.4495 | 1.4785 | 1.5083 | 1.4206 | 1.5151 | 1.4302 | 1.3755 | 0.9156 | 0.564  |
| 41.75 | 1.513  | 1.5045 | 1.4496 | 1.4782 | 1.5085 | 1.4194 | 1.514  | 1.4309 | 1.3757 | 0.9214 | 0.5656 |
| 42    | 1.5143 | 1.506  | 1.4492 | 1.4779 | 1.5087 | 1.4205 | 1.5143 | 1.4314 | 1.3766 | 0.9268 | 0.5688 |
| 42.25 | 1.5164 | 1.506  | 1.4512 | 1.4788 | 1.5096 | 1.4228 | 1.5151 | 1.4301 | 1.3755 | 0.9323 | 0.5703 |
| 42.5  | 1.5166 | 1.5062 | 1.4516 | 1.4784 | 1.5105 | 1.4217 | 1.5149 | 1.4302 | 1.3753 | 0.9376 | 0.5727 |
| 42.75 | 1.518  | 1.506  | 1.4518 | 1.4786 | 1.5095 | 1.421  | 1.5154 | 1.4317 | 1.3772 | 0.9419 | 0.5737 |
| 43    | 1.5154 | 1.5053 | 1.4522 | 1.4792 | 1.5115 | 1.4234 | 1.5156 | 1.4312 | 1.3768 | 0.9476 | 0.5763 |
| 43.25 | 1.5129 | 1.5059 | 1.4522 | 1.4785 | 1.5117 | 1.4229 | 1.5143 | 1.4312 | 1.3761 | 0.955  | 0.5778 |
| 43.5  | 1.5111 | 1.5064 | 1.4527 | 1.4786 | 1.5109 | 1.4231 | 1.5141 | 1.4323 | 1.3759 | 0.9585 | 0.58   |
| 43.75 | 1.5114 | 1.5084 | 1.453  | 1.4788 | 1.5117 | 1.4237 | 1.5155 | 1.4319 | 1.3759 | 0.9644 | 0.5819 |
| 44    | 1.5125 | 1.5078 | 1.4529 | 1.479  | 1.5117 | 1.4244 | 1.5157 | 1.4322 | 1.3755 | 0.9708 | 0.5829 |
| 44.25 | 1.5102 | 1.5073 | 1.4529 | 1.478  | 1.5121 | 1.4242 | 1.516  | 1.4322 | 1.3762 | 0.9753 | 0.5858 |
| 44.5  | 1.5105 | 1.5065 | 1.4523 | 1.4783 | 1.5119 | 1.4242 | 1.5157 | 1.4315 | 1.3759 | 0.9811 | 0.5874 |
| 44.75 | 1.5104 | 1.5065 | 1.454  | 1.4782 | 1.512  | 1.4242 | 1.5159 | 1.4316 | 1.3762 | 0.9856 | 0.589  |
| 45    | 1.5092 | 1.5064 | 1.4543 | 1.4777 | 1.5124 | 1.4247 | 1.5151 | 1.4326 | 1.3764 | 0.9902 | 0.5903 |
| 45.25 | 1.5105 | 1.5057 | 1.4541 | 1.4786 | 1.5124 | 1.4245 | 1.5155 | 1.4326 | 1.3756 | 0.9955 | 0.5934 |
| 45.5  | 1.5103 | 1.5065 | 1.4557 | 1.4778 | 1.5114 | 1.4255 | 1.5153 | 1.4332 | 1.3765 | 1.0014 | 0.5948 |
| 45.75 | 1.51   | 1.5067 | 1.4559 | 1.4773 | 1.5125 | 1.4255 | 1.5146 | 1.4332 | 1.3762 | 1.0047 | 0.5978 |
| 46    | 1.5108 | 1.5061 | 1.4561 | 1.4774 | 1.5121 | 1.4262 | 1.5145 | 1.4337 | 1.376  | 1.0108 | 0.5986 |
| 46.25 | 1.5109 | 1.5064 | 1.456  | 1.4777 | 1.5123 | 1.4252 | 1.5151 | 1.433  | 1.3767 | 1.0153 | 0.5997 |

|       |        |        |        |        |        |        |        |        |        |        |        |
|-------|--------|--------|--------|--------|--------|--------|--------|--------|--------|--------|--------|
| 46.5  | 1.511  | 1.5069 | 1.4571 | 1.478  | 1.5128 | 1.4254 | 1.5153 | 1.434  | 1.3768 | 1.0203 | 0.6025 |
| 46.75 | 1.511  | 1.5052 | 1.4577 | 1.4765 | 1.5117 | 1.4266 | 1.5148 | 1.4343 | 1.3762 | 1.0248 | 0.6047 |
| 47    | 1.5111 | 1.5059 | 1.4574 | 1.4773 | 1.5126 | 1.426  | 1.5142 | 1.4343 | 1.3751 | 1.0309 | 0.6068 |
| 47.25 | 1.5102 | 1.5042 | 1.4571 | 1.4782 | 1.5127 | 1.4258 | 1.515  | 1.4342 | 1.3756 | 1.0352 | 0.6091 |
| 47.5  | 1.5112 | 1.5044 | 1.4583 | 1.4786 | 1.5118 | 1.4265 | 1.5145 | 1.4343 | 1.3752 | 1.0401 | 0.6103 |
| 47.75 | 1.5109 | 1.5036 | 1.4575 | 1.4784 | 1.5122 | 1.426  | 1.5132 | 1.4339 | 1.375  | 1.0455 | 0.6128 |
| 48    | 1.511  | 1.5046 | 1.4582 | 1.4781 | 1.5131 | 1.4266 | 1.5138 | 1.4345 | 1.3746 | 1.0499 | 0.6143 |
| 48.25 | 1.511  | 1.5042 | 1.4587 | 1.4783 | 1.5128 | 1.4268 | 1.514  | 1.4346 | 1.3739 | 1.0552 | 0.6161 |
| 48.5  | 1.5111 | 1.504  | 1.4592 | 1.4774 | 1.5125 | 1.4271 | 1.5144 | 1.4345 | 1.3744 | 1.0603 | 0.6178 |
| 48.75 | 1.5107 | 1.5019 | 1.4578 | 1.4775 | 1.5126 | 1.427  | 1.5138 | 1.434  | 1.3738 | 1.0667 | 0.6192 |
| 49    | 1.5112 | 1.5026 | 1.4586 | 1.4782 | 1.513  | 1.4264 | 1.5151 | 1.4341 | 1.3743 | 1.0716 | 0.6209 |
| 49.25 | 1.5109 | 1.5034 | 1.4604 | 1.4779 | 1.5127 | 1.4263 | 1.5143 | 1.4332 | 1.3747 | 1.0752 | 0.6229 |
| 49.5  | 1.5094 | 1.504  | 1.4603 | 1.4768 | 1.513  | 1.4274 | 1.514  | 1.4337 | 1.3746 | 1.0806 | 0.6264 |
| 49.75 | 1.5105 | 1.5038 | 1.4602 | 1.4783 | 1.5131 | 1.4271 | 1.5145 | 1.4349 | 1.3752 | 1.0851 | 0.6276 |

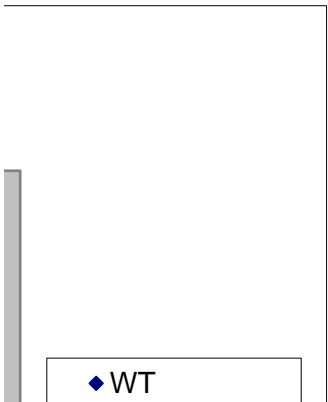

- 
- WT(GA 3)
  - ▲ WT(RAD 3)
  - × NO DRUG
  - × GA 3uM
  - GA 7uM
  - + NOVO 100
  - NOVO 250
  - RAD 3
  - ◆ RAD 10
  - RAD 30

60

**A17      A18      A19      A20      A21      A22      A23      A24**

| <b>TIME</b> | <b>WT</b> | <b>WT(GA 3)</b> | <b>WT(RAD 3)</b> | <b>NO DRUG</b> | <b>GA 3uM</b> | <b>GA 7uM</b> | <b>NOVO 100</b> | <b>NOVO 250</b> | <b>RAD 3</b> | <b>RAD 10</b> | <b>RAD 30</b> |
|-------------|-----------|-----------------|------------------|----------------|---------------|---------------|-----------------|-----------------|--------------|---------------|---------------|
| 0           | 0.1894    | 0.2051          | 0.1892           | 0.1602         | 0.1638        | 0.1646        | 0.1905          | 0.3472          | 0.1757       | 0.2745        | 0.204         |
| 0.25        | 0.1844    | 0.1929          | 0.1812           | 0.1543         | 0.1535        | 0.155         | 0.193           | 0.3396          | 0.1582       | 0.2678        | 0.1897        |
| 0.5         | 0.1833    | 0.1912          | 0.1787           | 0.1524         | 0.1515        | 0.1516        | 0.1948          | 0.3278          | 0.1544       | 0.2646        | 0.1878        |
| 0.75        | 0.1838    | 0.189           | 0.1758           | 0.1492         | 0.1479        | 0.1499        | 0.195           | 0.3194          | 0.152        | 0.263         | 0.1867        |
| 1           | 0.1843    | 0.1877          | 0.1818           | 0.1505         | 0.149         | 0.1504        | 0.1945          | 0.3156          | 0.1518       | 0.2619        | 0.1879        |
| 1.25        | 0.1867    | 0.1862          | 0.1836           | 0.1515         | 0.1495        | 0.1512        | 0.1963          | 0.307           | 0.153        | 0.2621        | 0.1881        |
| 1.5         | 0.188     | 0.186           | 0.1823           | 0.1512         | 0.1496        | 0.1518        | 0.1946          | 0.3021          | 0.1529       | 0.2619        | 0.1844        |
| 1.75        | 0.1903    | 0.1872          | 0.1822           | 0.152          | 0.1515        | 0.1528        | 0.1933          | 0.2914          | 0.1538       | 0.2614        | 0.1847        |

**SIN3**

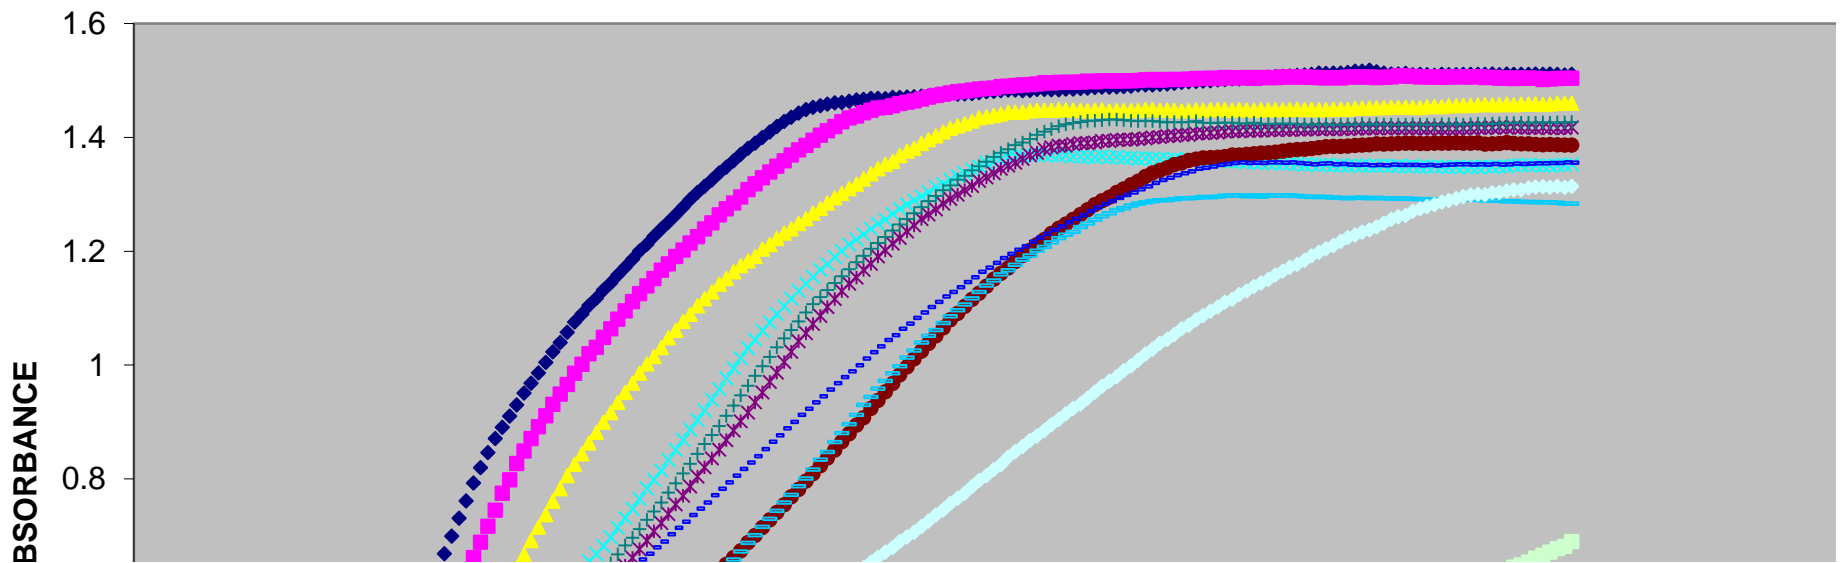

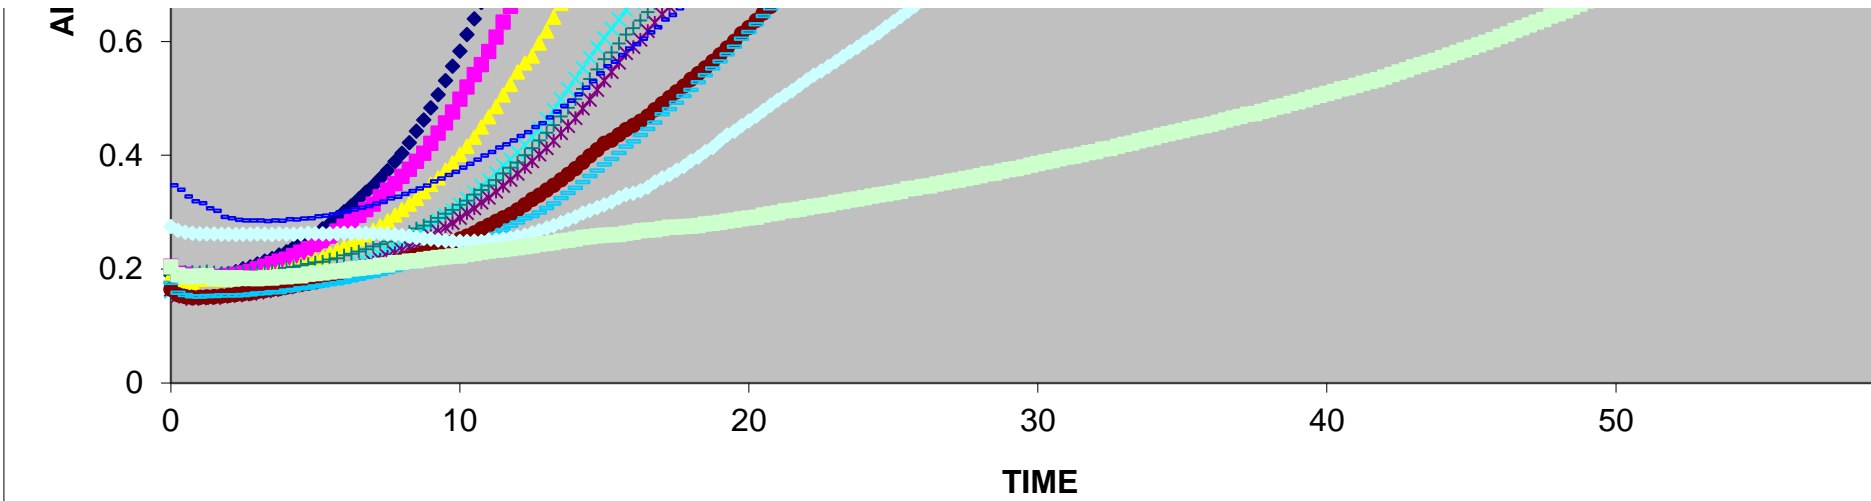

|       |        |        |        |        |        |        |        |        |        |        |        |
|-------|--------|--------|--------|--------|--------|--------|--------|--------|--------|--------|--------|
| 11.5  | 0.7614 | 0.6339 | 0.5059 | 0.3819 | 0.3461 | 0.2899 | 0.3682 | 0.4192 | 0.2688 | 0.2529 | 0.2342 |
| 11.75 | 0.7927 | 0.6618 | 0.5242 | 0.393  | 0.357  | 0.296  | 0.3783 | 0.4263 | 0.2762 | 0.2544 | 0.2359 |
| 12    | 0.8194 | 0.6889 | 0.5464 | 0.4051 | 0.3675 | 0.3042 | 0.3875 | 0.434  | 0.2822 | 0.2574 | 0.2374 |
| 12.25 | 0.8459 | 0.7168 | 0.5622 | 0.4179 | 0.3794 | 0.313  | 0.4001 | 0.4407 | 0.2891 | 0.2594 | 0.2392 |
| 12.5  | 0.8706 | 0.7448 | 0.5743 | 0.4324 | 0.3893 | 0.3225 | 0.4128 | 0.4497 | 0.2934 | 0.2636 | 0.2409 |
| 12.75 | 0.8904 | 0.7744 | 0.5968 | 0.4475 | 0.4013 | 0.3299 | 0.4259 | 0.4566 | 0.2994 | 0.2672 | 0.2436 |
| 13    | 0.9099 | 0.7982 | 0.6186 | 0.4639 | 0.4126 | 0.3388 | 0.4395 | 0.4667 | 0.3072 | 0.2719 | 0.2449 |
| 13.25 | 0.9301 | 0.8269 | 0.6426 | 0.4802 | 0.4257 | 0.3474 | 0.453  | 0.4765 | 0.3155 | 0.2764 | 0.2467 |
| 13.5  | 0.9508 | 0.849  | 0.6665 | 0.4985 | 0.4388 | 0.357  | 0.4683 | 0.4865 | 0.3247 | 0.2813 | 0.2493 |
| 13.75 | 0.9679 | 0.8707 | 0.6913 | 0.5164 | 0.4514 | 0.3663 | 0.4833 | 0.496  | 0.3336 | 0.2865 | 0.2508 |
| 14    | 0.986  | 0.8918 | 0.7152 | 0.5343 | 0.4653 | 0.3765 | 0.4987 | 0.5071 | 0.3429 | 0.2917 | 0.2531 |
| 14.25 | 1.0047 | 0.9106 | 0.7372 | 0.553  | 0.482  | 0.3879 | 0.5163 | 0.5188 | 0.3529 | 0.2981 | 0.2559 |
| 14.5  | 1.0233 | 0.9308 | 0.7608 | 0.5715 | 0.4972 | 0.3989 | 0.5341 | 0.5298 | 0.3637 | 0.3026 | 0.2568 |
| 14.75 | 1.0397 | 0.9491 | 0.7825 | 0.589  | 0.5148 | 0.4098 | 0.551  | 0.5439 | 0.3732 | 0.3081 | 0.2586 |
| 15    | 1.0577 | 0.966  | 0.8057 | 0.606  | 0.5313 | 0.4212 | 0.5688 | 0.5562 | 0.3839 | 0.3132 | 0.2596 |
| 15.25 | 1.0753 | 0.9853 | 0.8251 | 0.6223 | 0.5461 | 0.4267 | 0.5807 | 0.5642 | 0.3932 | 0.3182 | 0.26   |
| 15.5  | 1.0897 | 1.0015 | 0.8439 | 0.6388 | 0.5628 | 0.4362 | 0.5966 | 0.5762 | 0.404  | 0.3251 | 0.2607 |
| 15.75 | 1.1049 | 1.0198 | 0.8628 | 0.6556 | 0.5797 | 0.445  | 0.6119 | 0.5873 | 0.4151 | 0.331  | 0.263  |
| 16    | 1.1171 | 1.031  | 0.8817 | 0.668  | 0.5905 | 0.4523 | 0.6235 | 0.5951 | 0.4242 | 0.333  | 0.2649 |
| 16.25 | 1.1316 | 1.0487 | 0.8996 | 0.682  | 0.603  | 0.4598 | 0.6369 | 0.6049 | 0.4354 | 0.3378 | 0.2672 |
| 16.5  | 1.1443 | 1.0637 | 0.9165 | 0.6973 | 0.6183 | 0.4689 | 0.6517 | 0.6163 | 0.4461 | 0.3441 | 0.2685 |
| 16.75 | 1.1579 | 1.0806 | 0.9342 | 0.7141 | 0.6329 | 0.4799 | 0.6671 | 0.6252 | 0.4576 | 0.3531 | 0.2693 |
| 17    | 1.1715 | 1.0952 | 0.9517 | 0.7313 | 0.6473 | 0.4908 | 0.6828 | 0.6384 | 0.4719 | 0.3604 | 0.2713 |
| 17.25 | 1.1858 | 1.1114 | 0.9682 | 0.7471 | 0.6613 | 0.5012 | 0.6967 | 0.6465 | 0.4809 | 0.3661 | 0.2736 |
| 17.5  | 1.2004 | 1.1256 | 0.9855 | 0.7643 | 0.6764 | 0.5117 | 0.7117 | 0.6583 | 0.4923 | 0.3737 | 0.2734 |
| 17.75 | 1.2123 | 1.1388 | 1.0016 | 0.783  | 0.6915 | 0.5217 | 0.7279 | 0.6686 | 0.5044 | 0.3807 | 0.2748 |

|       |        |        |        |        |        |        |        |        |        |        |        |
|-------|--------|--------|--------|--------|--------|--------|--------|--------|--------|--------|--------|
| 18    | 1.2261 | 1.1522 | 1.015  | 0.7984 | 0.7075 | 0.5336 | 0.7428 | 0.6799 | 0.5147 | 0.3901 | 0.2751 |
| 18.25 | 1.239  | 1.1664 | 1.0307 | 0.8145 | 0.7224 | 0.5434 | 0.7582 | 0.6899 | 0.5284 | 0.397  | 0.2762 |
| 18.5  | 1.251  | 1.1779 | 1.0478 | 0.8329 | 0.7381 | 0.5537 | 0.7757 | 0.7027 | 0.5409 | 0.4061 | 0.279  |
| 18.75 | 1.2641 | 1.1907 | 1.0607 | 0.8514 | 0.7551 | 0.565  | 0.7923 | 0.7139 | 0.5523 | 0.4134 | 0.2806 |
| 19    | 1.2773 | 1.2018 | 1.0765 | 0.8685 | 0.7704 | 0.5769 | 0.8097 | 0.7245 | 0.5647 | 0.4255 | 0.2822 |
| 19.25 | 1.2907 | 1.2145 | 1.0891 | 0.8863 | 0.7863 | 0.5884 | 0.8262 | 0.7366 | 0.5774 | 0.4356 | 0.2844 |
| 19.5  | 1.3032 | 1.2259 | 1.1041 | 0.9033 | 0.804  | 0.6002 | 0.8436 | 0.7476 | 0.5906 | 0.4422 | 0.286  |
| 19.75 | 1.3141 | 1.239  | 1.1166 | 0.9202 | 0.8202 | 0.6139 | 0.861  | 0.7581 | 0.6046 | 0.452  | 0.2881 |
| 20    | 1.3251 | 1.2497 | 1.1283 | 0.9386 | 0.8358 | 0.6247 | 0.8768 | 0.7715 | 0.6169 | 0.4602 | 0.2899 |
| 20.25 | 1.3374 | 1.2637 | 1.1419 | 0.9574 | 0.8512 | 0.6369 | 0.8927 | 0.7825 | 0.6301 | 0.469  | 0.2913 |
| 20.5  | 1.3474 | 1.2743 | 1.1521 | 0.9767 | 0.8679 | 0.65   | 0.911  | 0.7937 | 0.645  | 0.4782 | 0.2949 |
| 20.75 | 1.3589 | 1.2848 | 1.1637 | 0.9948 | 0.8846 | 0.6617 | 0.9286 | 0.8056 | 0.6585 | 0.4877 | 0.2971 |
| 21    | 1.3704 | 1.2956 | 1.1744 | 1.0121 | 0.9012 | 0.6737 | 0.9465 | 0.8175 | 0.6723 | 0.4967 | 0.299  |
| 21.25 | 1.3806 | 1.3083 | 1.1829 | 1.0296 | 0.9166 | 0.6878 | 0.9637 | 0.8286 | 0.6874 | 0.5051 | 0.3021 |
| 21.5  | 1.39   | 1.3184 | 1.1906 | 1.0446 | 0.9343 | 0.7005 | 0.9809 | 0.8401 | 0.701  | 0.5132 | 0.3037 |
| 21.75 | 1.3999 | 1.3289 | 1.2037 | 1.0604 | 0.952  | 0.7146 | 0.998  | 0.8522 | 0.7156 | 0.523  | 0.3054 |
| 22    | 1.4093 | 1.3395 | 1.2116 | 1.075  | 0.9702 | 0.7281 | 1.0144 | 0.8653 | 0.7298 | 0.5323 | 0.3081 |
| 22.25 | 1.4189 | 1.3493 | 1.2223 | 1.0893 | 0.9868 | 0.741  | 1.031  | 0.8765 | 0.7439 | 0.5405 | 0.31   |
| 22.5  | 1.4278 | 1.3589 | 1.2316 | 1.1032 | 1.0051 | 0.7545 | 1.0467 | 0.889  | 0.7582 | 0.5481 | 0.3121 |
| 22.75 | 1.4356 | 1.369  | 1.2391 | 1.1164 | 1.0231 | 0.7683 | 1.0615 | 0.9    | 0.7717 | 0.5561 | 0.3137 |
| 23    | 1.4425 | 1.3781 | 1.2485 | 1.1299 | 1.0419 | 0.7814 | 1.0767 | 0.9125 | 0.7873 | 0.5644 | 0.3168 |
| 23.25 | 1.4488 | 1.3861 | 1.257  | 1.1429 | 1.0557 | 0.7959 | 1.0922 | 0.9231 | 0.8005 | 0.5734 | 0.3186 |
| 23.5  | 1.4527 | 1.3947 | 1.2667 | 1.1546 | 1.0722 | 0.8089 | 1.107  | 0.9344 | 0.8161 | 0.5818 | 0.3212 |
| 23.75 | 1.4559 | 1.4037 | 1.2752 | 1.1672 | 1.0864 | 0.8229 | 1.1192 | 0.9452 | 0.8338 | 0.5896 | 0.3232 |
| 24    | 1.4583 | 1.4119 | 1.2845 | 1.1772 | 1.1018 | 0.8367 | 1.1318 | 0.957  | 0.8471 | 0.5989 | 0.3256 |
| 24.25 | 1.4609 | 1.4188 | 1.2937 | 1.1896 | 1.1158 | 0.8506 | 1.1442 | 0.968  | 0.8648 | 0.6069 | 0.3282 |
| 24.5  | 1.4615 | 1.4276 | 1.3014 | 1.2002 | 1.1298 | 0.8654 | 1.1557 | 0.9789 | 0.8804 | 0.6152 | 0.3307 |
| 24.75 | 1.4635 | 1.4341 | 1.3101 | 1.2118 | 1.143  | 0.8792 | 1.1682 | 0.9891 | 0.8961 | 0.6256 | 0.3322 |
| 25    | 1.466  | 1.4379 | 1.3177 | 1.2203 | 1.1534 | 0.8944 | 1.1806 | 0.9995 | 0.9126 | 0.6349 | 0.3341 |
| 25.25 | 1.4669 | 1.4431 | 1.3269 | 1.2295 | 1.1669 | 0.9071 | 1.1917 | 1.0112 | 0.9299 | 0.6436 | 0.3365 |
| 25.5  | 1.4687 | 1.4476 | 1.3358 | 1.2391 | 1.1776 | 0.9234 | 1.2041 | 1.0226 | 0.9438 | 0.6532 | 0.3409 |
| 25.75 | 1.4687 | 1.4518 | 1.345  | 1.2479 | 1.1906 | 0.938  | 1.2146 | 1.0326 | 0.9583 | 0.6623 | 0.3424 |
| 26    | 1.4682 | 1.453  | 1.3526 | 1.2555 | 1.2015 | 0.9528 | 1.2248 | 1.0438 | 0.972  | 0.671  | 0.3449 |
| 26.25 | 1.4704 | 1.4557 | 1.3577 | 1.2656 | 1.2133 | 0.9673 | 1.2365 | 1.0523 | 0.9857 | 0.6791 | 0.3461 |
| 26.5  | 1.4702 | 1.4595 | 1.368  | 1.2745 | 1.2236 | 0.9827 | 1.247  | 1.0639 | 0.998  | 0.6895 | 0.3497 |
| 26.75 | 1.4706 | 1.4619 | 1.3756 | 1.2818 | 1.2344 | 0.9967 | 1.2567 | 1.0726 | 1.0129 | 0.6983 | 0.3516 |
| 27    | 1.4716 | 1.4639 | 1.3808 | 1.2889 | 1.2454 | 1.0106 | 1.2666 | 1.0826 | 1.0254 | 0.7058 | 0.3545 |
| 27.25 | 1.4725 | 1.4677 | 1.3894 | 1.2965 | 1.2563 | 1.0246 | 1.2774 | 1.0925 | 1.0393 | 0.7161 | 0.3561 |
| 27.5  | 1.473  | 1.4709 | 1.396  | 1.304  | 1.2647 | 1.0381 | 1.2882 | 1.1017 | 1.0514 | 0.7256 | 0.3589 |
| 27.75 | 1.4747 | 1.4735 | 1.4025 | 1.313  | 1.2735 | 1.0513 | 1.2968 | 1.1108 | 1.0617 | 0.7364 | 0.3612 |
| 28    | 1.4747 | 1.4758 | 1.4095 | 1.318  | 1.2834 | 1.0651 | 1.3069 | 1.1203 | 1.0739 | 0.7455 | 0.3641 |
| 28.25 | 1.4772 | 1.4784 | 1.4156 | 1.326  | 1.2919 | 1.0793 | 1.3156 | 1.1283 | 1.0855 | 0.7565 | 0.3676 |

|       |        |        |        |        |        |        |        |        |        |        |        |
|-------|--------|--------|--------|--------|--------|--------|--------|--------|--------|--------|--------|
| 28.5  | 1.4758 | 1.4806 | 1.4201 | 1.3318 | 1.2995 | 1.0905 | 1.3257 | 1.1367 | 1.0961 | 0.7656 | 0.3689 |
| 28.75 | 1.4763 | 1.4813 | 1.4239 | 1.337  | 1.3069 | 1.1033 | 1.3326 | 1.1457 | 1.1067 | 0.7747 | 0.3723 |
| 29    | 1.4771 | 1.4829 | 1.4289 | 1.3433 | 1.3143 | 1.1156 | 1.3423 | 1.1541 | 1.1172 | 0.7862 | 0.3746 |
| 29.25 | 1.4786 | 1.485  | 1.4341 | 1.3487 | 1.3234 | 1.1262 | 1.3491 | 1.1637 | 1.1281 | 0.7971 | 0.3766 |
| 29.5  | 1.4803 | 1.4861 | 1.4367 | 1.3551 | 1.3296 | 1.1385 | 1.3573 | 1.171  | 1.1396 | 0.8057 | 0.3791 |
| 29.75 | 1.4807 | 1.4866 | 1.4387 | 1.358  | 1.337  | 1.1509 | 1.3654 | 1.1797 | 1.1484 | 0.8162 | 0.3825 |
| 30    | 1.4823 | 1.4892 | 1.4412 | 1.3619 | 1.3447 | 1.1611 | 1.3731 | 1.1881 | 1.1592 | 0.8245 | 0.3853 |
| 30.25 | 1.4831 | 1.49   | 1.4444 | 1.3657 | 1.3504 | 1.1706 | 1.3791 | 1.1953 | 1.1666 | 0.838  | 0.3885 |
| 30.5  | 1.4829 | 1.4913 | 1.4444 | 1.3664 | 1.3557 | 1.182  | 1.3863 | 1.2025 | 1.1764 | 0.8477 | 0.3905 |
| 30.75 | 1.4823 | 1.4923 | 1.4446 | 1.3671 | 1.3625 | 1.1923 | 1.3908 | 1.2089 | 1.1852 | 0.8567 | 0.3942 |
| 31    | 1.4825 | 1.4929 | 1.4466 | 1.3682 | 1.3685 | 1.2014 | 1.3972 | 1.2168 | 1.1927 | 0.8675 | 0.3969 |
| 31.25 | 1.4843 | 1.4939 | 1.448  | 1.3691 | 1.3728 | 1.2117 | 1.4042 | 1.2237 | 1.201  | 0.8754 | 0.3987 |
| 31.5  | 1.4842 | 1.496  | 1.4475 | 1.3696 | 1.3793 | 1.2205 | 1.4101 | 1.2305 | 1.2075 | 0.8849 | 0.4014 |
| 31.75 | 1.4837 | 1.4956 | 1.4475 | 1.3686 | 1.3824 | 1.2312 | 1.4143 | 1.2376 | 1.2157 | 0.8948 | 0.4045 |
| 32    | 1.4837 | 1.4964 | 1.4488 | 1.368  | 1.3856 | 1.2403 | 1.4194 | 1.2434 | 1.2231 | 0.9043 | 0.4063 |
| 32.25 | 1.4847 | 1.4969 | 1.4483 | 1.3682 | 1.3855 | 1.2476 | 1.4232 | 1.2507 | 1.2288 | 0.9141 | 0.4106 |
| 32.5  | 1.4848 | 1.4964 | 1.448  | 1.3668 | 1.3879 | 1.2558 | 1.4254 | 1.2574 | 1.2343 | 0.9234 | 0.412  |
| 32.75 | 1.4858 | 1.4974 | 1.448  | 1.3662 | 1.39   | 1.2646 | 1.4272 | 1.2635 | 1.2423 | 0.9318 | 0.4158 |
| 33    | 1.4867 | 1.4992 | 1.4467 | 1.3659 | 1.3896 | 1.2728 | 1.4293 | 1.2706 | 1.2485 | 0.9415 | 0.4192 |
| 33.25 | 1.4876 | 1.498  | 1.4476 | 1.365  | 1.3912 | 1.2816 | 1.4292 | 1.277  | 1.2557 | 0.9524 | 0.4214 |
| 33.5  | 1.4885 | 1.4993 | 1.4481 | 1.3669 | 1.3937 | 1.2888 | 1.4304 | 1.2829 | 1.2617 | 0.9624 | 0.4256 |
| 33.75 | 1.4883 | 1.4994 | 1.4469 | 1.3651 | 1.394  | 1.2948 | 1.4315 | 1.288  | 1.2667 | 0.9716 | 0.4281 |
| 34    | 1.4888 | 1.4988 | 1.4474 | 1.3654 | 1.3954 | 1.3034 | 1.4312 | 1.2934 | 1.2723 | 0.9795 | 0.4311 |
| 34.25 | 1.4892 | 1.4995 | 1.4471 | 1.3638 | 1.3962 | 1.3093 | 1.4303 | 1.2985 | 1.2758 | 0.9898 | 0.4351 |
| 34.5  | 1.4899 | 1.4996 | 1.4474 | 1.3637 | 1.3963 | 1.3168 | 1.4291 | 1.3033 | 1.2803 | 0.9987 | 0.4376 |
| 34.75 | 1.4919 | 1.5003 | 1.4472 | 1.3624 | 1.3969 | 1.3232 | 1.4286 | 1.309  | 1.2837 | 1.0085 | 0.4409 |
| 35    | 1.492  | 1.5014 | 1.4486 | 1.3632 | 1.3981 | 1.3313 | 1.429  | 1.3141 | 1.2857 | 1.0191 | 0.4434 |
| 35.25 | 1.4922 | 1.502  | 1.4486 | 1.3628 | 1.3998 | 1.3373 | 1.4288 | 1.3199 | 1.288  | 1.0279 | 0.4466 |
| 35.5  | 1.4933 | 1.5004 | 1.4477 | 1.3616 | 1.4006 | 1.3418 | 1.4275 | 1.3251 | 1.2897 | 1.0385 | 0.4495 |
| 35.75 | 1.4939 | 1.5019 | 1.4479 | 1.3614 | 1.4021 | 1.3464 | 1.4266 | 1.3291 | 1.29   | 1.0453 | 0.4518 |
| 36    | 1.4951 | 1.5018 | 1.4476 | 1.3617 | 1.4028 | 1.3524 | 1.4272 | 1.3335 | 1.2917 | 1.0538 | 0.4545 |
| 36.25 | 1.4965 | 1.5015 | 1.4469 | 1.361  | 1.4044 | 1.3552 | 1.4263 | 1.3372 | 1.2929 | 1.0635 | 0.4582 |
| 36.5  | 1.4976 | 1.5021 | 1.4473 | 1.3613 | 1.4045 | 1.3595 | 1.427  | 1.3403 | 1.2931 | 1.0697 | 0.4618 |
| 36.75 | 1.4983 | 1.5037 | 1.4481 | 1.3595 | 1.4065 | 1.3616 | 1.4284 | 1.3447 | 1.2938 | 1.0796 | 0.4653 |
| 37    | 1.4992 | 1.5034 | 1.4477 | 1.3594 | 1.4072 | 1.3638 | 1.4257 | 1.3466 | 1.2953 | 1.0866 | 0.4681 |
| 37.25 | 1.4997 | 1.504  | 1.449  | 1.3591 | 1.4078 | 1.3646 | 1.4252 | 1.3488 | 1.295  | 1.0945 | 0.472  |
| 37.5  | 1.5011 | 1.5037 | 1.4489 | 1.3589 | 1.4086 | 1.3652 | 1.4258 | 1.3517 | 1.2961 | 1.1017 | 0.4735 |
| 37.75 | 1.502  | 1.505  | 1.4486 | 1.3588 | 1.4098 | 1.3663 | 1.4256 | 1.3534 | 1.2976 | 1.1103 | 0.4774 |
| 38    | 1.5029 | 1.5047 | 1.4475 | 1.3578 | 1.4109 | 1.3688 | 1.4256 | 1.3549 | 1.2978 | 1.1153 | 0.48   |
| 38.25 | 1.5029 | 1.5046 | 1.449  | 1.3573 | 1.4105 | 1.369  | 1.4246 | 1.3562 | 1.2983 | 1.1239 | 0.4845 |
| 38.5  | 1.504  | 1.505  | 1.4481 | 1.3559 | 1.4115 | 1.3703 | 1.4244 | 1.355  | 1.2964 | 1.1299 | 0.4869 |
| 38.75 | 1.5035 | 1.5042 | 1.448  | 1.3556 | 1.4119 | 1.3711 | 1.4256 | 1.3554 | 1.2979 | 1.1377 | 0.4914 |



|       |        |        |        |        |        |        |        |        |        |        |        |
|-------|--------|--------|--------|--------|--------|--------|--------|--------|--------|--------|--------|
| 39    | 1.5042 | 1.505  | 1.4488 | 1.3558 | 1.4118 | 1.3723 | 1.4242 | 1.3548 | 1.2962 | 1.1443 | 0.4942 |
| 39.25 | 1.5058 | 1.5049 | 1.4482 | 1.3553 | 1.4122 | 1.373  | 1.4233 | 1.3561 | 1.2979 | 1.1501 | 0.4977 |
| 39.5  | 1.507  | 1.5052 | 1.4485 | 1.3545 | 1.4128 | 1.3741 | 1.4243 | 1.3563 | 1.2977 | 1.1579 | 0.5022 |
| 39.75 | 1.5073 | 1.506  | 1.4484 | 1.3539 | 1.4137 | 1.3756 | 1.4243 | 1.3557 | 1.2975 | 1.1651 | 0.5055 |
| 40    | 1.5077 | 1.5062 | 1.4489 | 1.3541 | 1.4127 | 1.3776 | 1.4243 | 1.356  | 1.2981 | 1.1714 | 0.5089 |
| 40.25 | 1.5093 | 1.5063 | 1.4496 | 1.3533 | 1.4141 | 1.3785 | 1.4234 | 1.3547 | 1.2973 | 1.1769 | 0.5122 |
| 40.5  | 1.5096 | 1.506  | 1.4489 | 1.3516 | 1.4137 | 1.3789 | 1.4223 | 1.3537 | 1.2963 | 1.1841 | 0.5164 |
| 40.75 | 1.5108 | 1.5059 | 1.4494 | 1.3527 | 1.4141 | 1.3804 | 1.4222 | 1.353  | 1.2956 | 1.1921 | 0.5188 |
| 41    | 1.5129 | 1.5053 | 1.4485 | 1.3517 | 1.4146 | 1.3819 | 1.4229 | 1.3537 | 1.2955 | 1.1979 | 0.523  |
| 41.25 | 1.5127 | 1.5048 | 1.4491 | 1.3517 | 1.4147 | 1.3838 | 1.423  | 1.3544 | 1.2954 | 1.2045 | 0.5269 |
| 41.5  | 1.513  | 1.5052 | 1.4495 | 1.3507 | 1.4139 | 1.3841 | 1.4218 | 1.3525 | 1.2945 | 1.2097 | 0.5299 |
| 41.75 | 1.513  | 1.5045 | 1.4496 | 1.3512 | 1.4144 | 1.3841 | 1.4226 | 1.3532 | 1.2939 | 1.2172 | 0.5331 |
| 42    | 1.5143 | 1.506  | 1.4492 | 1.3501 | 1.4148 | 1.3847 | 1.4222 | 1.3524 | 1.2933 | 1.2237 | 0.5371 |
| 42.25 | 1.5164 | 1.506  | 1.4512 | 1.3505 | 1.4154 | 1.3861 | 1.4228 | 1.3514 | 1.2934 | 1.2285 | 0.5417 |
| 42.5  | 1.5166 | 1.5062 | 1.4516 | 1.3504 | 1.4155 | 1.3864 | 1.4238 | 1.3523 | 1.2942 | 1.2335 | 0.5465 |
| 42.75 | 1.518  | 1.506  | 1.4518 | 1.3499 | 1.4155 | 1.3873 | 1.4222 | 1.3513 | 1.2931 | 1.2376 | 0.5502 |
| 43    | 1.5154 | 1.5053 | 1.4522 | 1.3497 | 1.4155 | 1.3886 | 1.4234 | 1.3518 | 1.2939 | 1.2427 | 0.5553 |
| 43.25 | 1.5129 | 1.5059 | 1.4522 | 1.3506 | 1.4163 | 1.3882 | 1.4225 | 1.351  | 1.2929 | 1.2493 | 0.5591 |
| 43.5  | 1.5111 | 1.5064 | 1.4527 | 1.3501 | 1.4156 | 1.3886 | 1.4222 | 1.3519 | 1.2927 | 1.2559 | 0.5632 |
| 43.75 | 1.5114 | 1.5084 | 1.453  | 1.3494 | 1.4159 | 1.3891 | 1.4222 | 1.3518 | 1.2923 | 1.2604 | 0.5665 |
| 44    | 1.5125 | 1.5078 | 1.4529 | 1.3486 | 1.4163 | 1.3896 | 1.4225 | 1.3514 | 1.2925 | 1.263  | 0.5714 |
| 44.25 | 1.5102 | 1.5073 | 1.4529 | 1.3498 | 1.4155 | 1.3898 | 1.423  | 1.3516 | 1.292  | 1.2699 | 0.5763 |
| 44.5  | 1.5105 | 1.5065 | 1.4523 | 1.3482 | 1.416  | 1.3891 | 1.4222 | 1.3512 | 1.2915 | 1.2744 | 0.5805 |
| 44.75 | 1.5104 | 1.5065 | 1.454  | 1.3487 | 1.4152 | 1.3895 | 1.4226 | 1.3516 | 1.2914 | 1.2786 | 0.5849 |
| 45    | 1.5092 | 1.5064 | 1.4543 | 1.3492 | 1.416  | 1.3898 | 1.4224 | 1.3505 | 1.2909 | 1.2816 | 0.5897 |
| 45.25 | 1.5105 | 1.5057 | 1.4541 | 1.3482 | 1.4152 | 1.3897 | 1.4229 | 1.3516 | 1.2902 | 1.2862 | 0.5942 |
| 45.5  | 1.5103 | 1.5065 | 1.4557 | 1.3479 | 1.4156 | 1.3899 | 1.423  | 1.352  | 1.2908 | 1.2894 | 0.5987 |
| 45.75 | 1.51   | 1.5067 | 1.4559 | 1.3484 | 1.4153 | 1.3905 | 1.4233 | 1.3525 | 1.2901 | 1.2923 | 0.6032 |
| 46    | 1.5108 | 1.5061 | 1.4561 | 1.349  | 1.4157 | 1.39   | 1.4227 | 1.3529 | 1.2901 | 1.2958 | 0.6086 |
| 46.25 | 1.5109 | 1.5064 | 1.456  | 1.3476 | 1.4164 | 1.3901 | 1.4231 | 1.3523 | 1.2903 | 1.299  | 0.6131 |
| 46.5  | 1.511  | 1.5069 | 1.4571 | 1.3479 | 1.4166 | 1.3906 | 1.4239 | 1.3528 | 1.2901 | 1.2997 | 0.6194 |
| 46.75 | 1.511  | 1.5052 | 1.4577 | 1.3491 | 1.4162 | 1.3884 | 1.4236 | 1.3522 | 1.2894 | 1.2995 | 0.6242 |
| 47    | 1.5111 | 1.5059 | 1.4574 | 1.348  | 1.4168 | 1.3889 | 1.4244 | 1.3534 | 1.2894 | 1.3027 | 0.629  |
| 47.25 | 1.5102 | 1.5042 | 1.4571 | 1.349  | 1.4179 | 1.3892 | 1.4246 | 1.3521 | 1.2885 | 1.3033 | 0.6341 |
| 47.5  | 1.5112 | 1.5044 | 1.4583 | 1.3494 | 1.417  | 1.3908 | 1.4259 | 1.3528 | 1.2873 | 1.3062 | 0.6388 |
| 47.75 | 1.5109 | 1.5036 | 1.4575 | 1.3508 | 1.4177 | 1.3892 | 1.4252 | 1.354  | 1.2878 | 1.3076 | 0.6445 |
| 48    | 1.511  | 1.5046 | 1.4582 | 1.3513 | 1.4171 | 1.3889 | 1.4259 | 1.3534 | 1.2868 | 1.308  | 0.6489 |
| 48.25 | 1.511  | 1.5042 | 1.4587 | 1.3515 | 1.4166 | 1.3889 | 1.4259 | 1.3538 | 1.2862 | 1.3109 | 0.654  |
| 48.5  | 1.5111 | 1.504  | 1.4592 | 1.351  | 1.4164 | 1.3874 | 1.4259 | 1.3546 | 1.2864 | 1.3129 | 0.6607 |
| 48.75 | 1.5107 | 1.5019 | 1.4578 | 1.3507 | 1.4176 | 1.3868 | 1.4263 | 1.3542 | 1.2856 | 1.3131 | 0.6656 |
| 49    | 1.5112 | 1.5026 | 1.4586 | 1.3505 | 1.4165 | 1.3877 | 1.426  | 1.3548 | 1.2856 | 1.3121 | 0.6714 |
| 49.25 | 1.5109 | 1.5034 | 1.4604 | 1.3509 | 1.4162 | 1.3871 | 1.4264 | 1.3547 | 1.2855 | 1.3138 | 0.6773 |

|       |        |        |        |        |        |        |        |        |        |        |        |
|-------|--------|--------|--------|--------|--------|--------|--------|--------|--------|--------|--------|
| 49.5  | 1.5094 | 1.504  | 1.4603 | 1.3518 | 1.4164 | 1.3867 | 1.4265 | 1.356  | 1.2838 | 1.3124 | 0.6814 |
| 49.75 | 1.5105 | 1.5038 | 1.4602 | 1.3525 | 1.4176 | 1.3867 | 1.4269 | 1.3554 | 1.2837 | 1.3137 | 0.6899 |

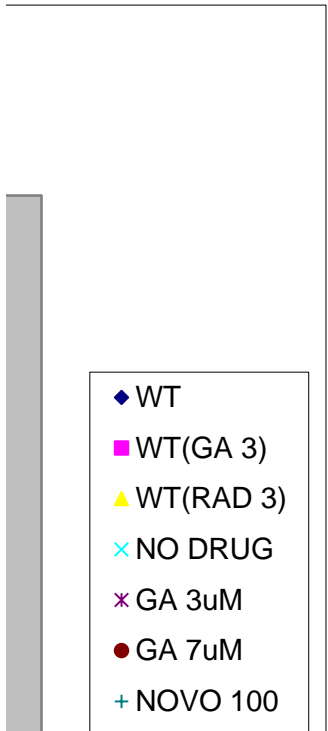

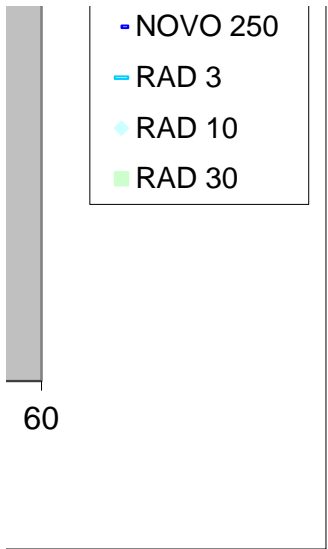

**J17 J18 J19 J20 J21 J22 J23 J24**

| TIME | WT     | WT(GA 3) | WT(RAD 3) | NO DRUG | GA 3uM | GA 7uM | NOVO 10 | NOVO 250 | RAD 3  | RAD 10 | RAD 30 |
|------|--------|----------|-----------|---------|--------|--------|---------|----------|--------|--------|--------|
| 0    | 0.1894 | 0.2051   | 0.1892    | 0.147   | 0.1409 | 0.1402 | 0.1842  | 0.2458   | 0.1785 | 0.266  | 0.1494 |
| 0.25 | 0.1844 | 0.1929   | 0.1812    | 0.1491  | 0.1455 | 0.141  | 0.1862  | 0.2425   | 0.1659 | 0.2582 | 0.1464 |
| 0.5  | 0.1833 | 0.1912   | 0.1787    | 0.1482  | 0.1431 | 0.1413 | 0.1879  | 0.241    | 0.1587 | 0.254  | 0.1422 |
| 0.75 | 0.1838 | 0.189    | 0.1758    | 0.1489  | 0.1405 | 0.1405 | 0.1888  | 0.2396   | 0.154  | 0.2502 | 0.1411 |
| 1    | 0.1843 | 0.1877   | 0.1818    | 0.1472  | 0.1408 | 0.1409 | 0.1896  | 0.2402   | 0.1485 | 0.2465 | 0.1401 |
| 1.25 | 0.1867 | 0.1862   | 0.1836    | 0.1482  | 0.1404 | 0.1405 | 0.1902  | 0.2397   | 0.1475 | 0.2427 | 0.1391 |
| 1.5  | 0.188  | 0.186    | 0.1823    | 0.1483  | 0.1426 | 0.1408 | 0.1912  | 0.2392   | 0.146  | 0.2401 | 0.1372 |

**SSA1**

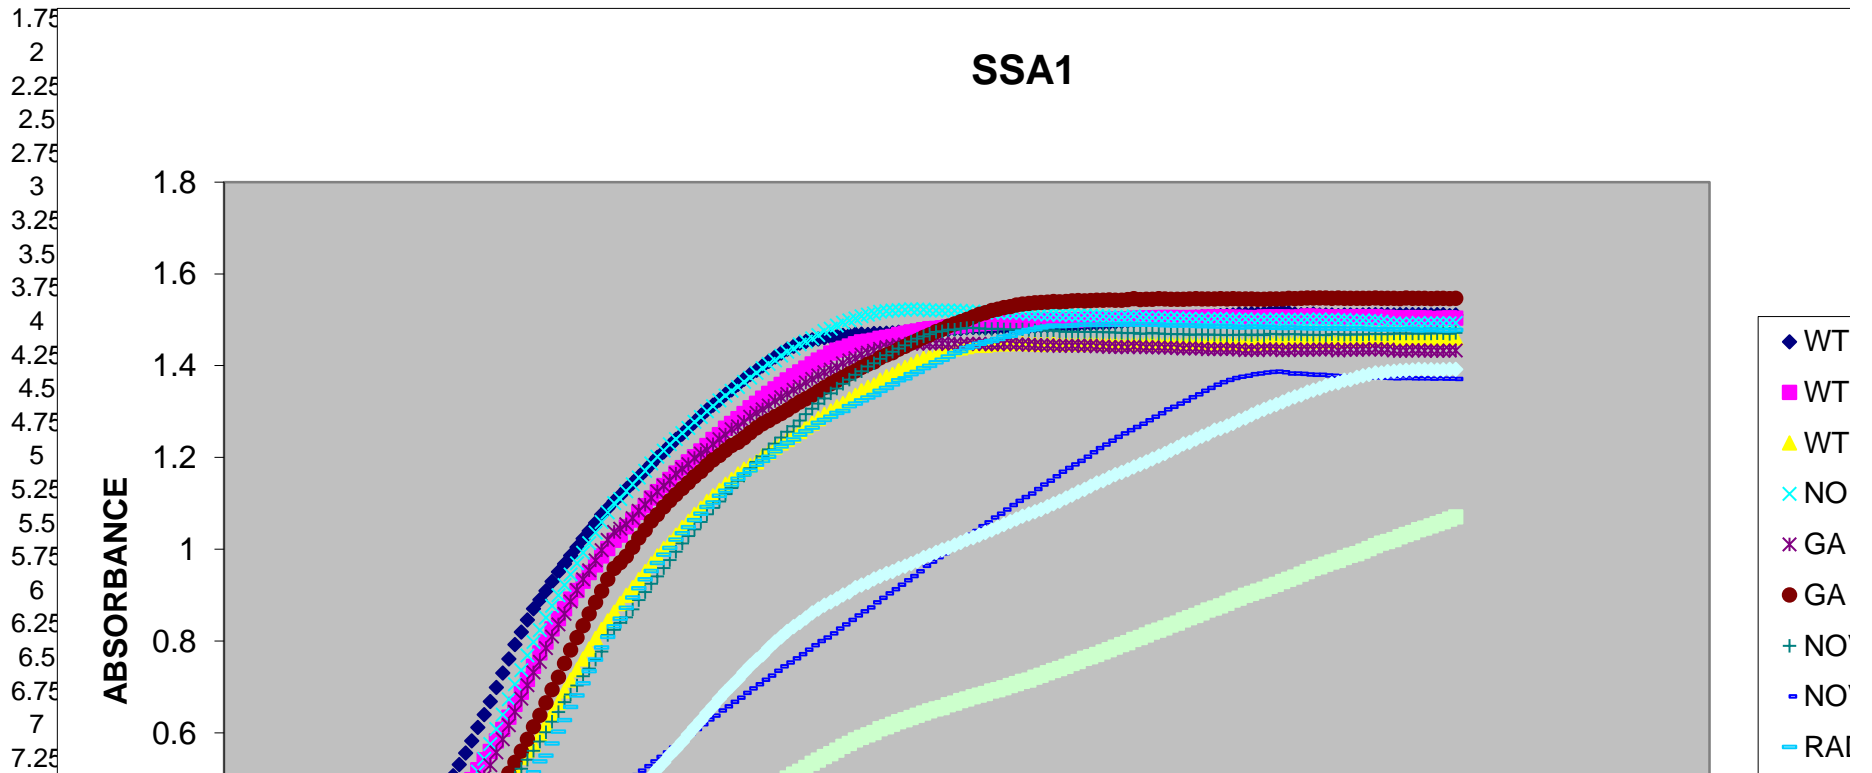

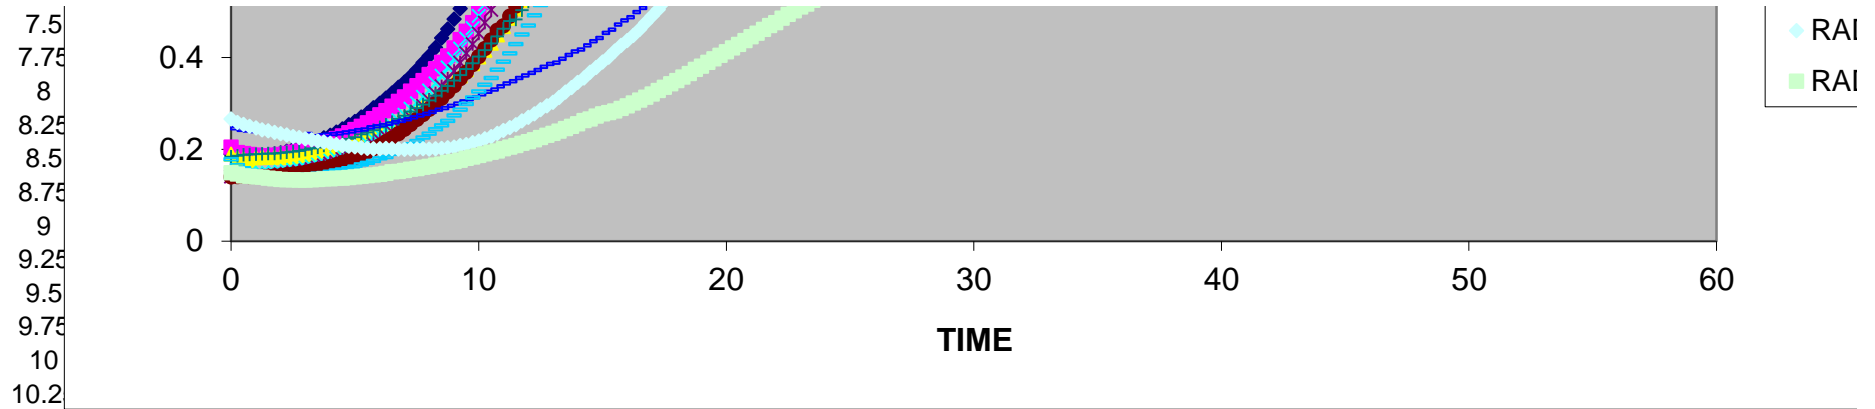

|       |        |        |        |        |        |        |        |        |        |        |        |
|-------|--------|--------|--------|--------|--------|--------|--------|--------|--------|--------|--------|
| 10.5  | 0.6397 | 0.5418 | 0.4316 | 0.5439 | 0.5039 | 0.4381 | 0.4306 | 0.3305 | 0.3556 | 0.2278 | 0.1936 |
| 10.75 | 0.6685 | 0.5593 | 0.4497 | 0.576  | 0.5299 | 0.4591 | 0.4462 | 0.3376 | 0.3732 | 0.2347 | 0.1968 |
| 11    | 0.6992 | 0.5825 | 0.4678 | 0.6086 | 0.5579 | 0.469  | 0.463  | 0.3436 | 0.391  | 0.2411 | 0.2012 |
| 11.25 | 0.7307 | 0.6075 | 0.4857 | 0.6399 | 0.5864 | 0.4896 | 0.4798 | 0.3481 | 0.4094 | 0.2473 | 0.2049 |
| 11.5  | 0.7614 | 0.6339 | 0.5059 | 0.673  | 0.6165 | 0.5123 | 0.4832 | 0.3557 | 0.4294 | 0.2535 | 0.2086 |
| 11.75 | 0.7927 | 0.6618 | 0.5242 | 0.7059 | 0.6462 | 0.5359 | 0.5031 | 0.3607 | 0.4499 | 0.2617 | 0.2134 |
| 12    | 0.8194 | 0.6889 | 0.5464 | 0.737  | 0.6746 | 0.56   | 0.5219 | 0.3662 | 0.4696 | 0.2695 | 0.217  |
| 12.25 | 0.8459 | 0.7168 | 0.5622 | 0.7689 | 0.7041 | 0.5864 | 0.5414 | 0.3725 | 0.4919 | 0.2772 | 0.2211 |
| 12.5  | 0.8706 | 0.7448 | 0.5743 | 0.7984 | 0.7315 | 0.6135 | 0.5611 | 0.3795 | 0.5144 | 0.2862 | 0.2256 |
| 12.75 | 0.8904 | 0.7744 | 0.5968 | 0.8241 | 0.755  | 0.6383 | 0.5812 | 0.3863 | 0.5379 | 0.2946 | 0.2305 |
| 13    | 0.9099 | 0.7982 | 0.6186 | 0.8512 | 0.7846 | 0.6657 | 0.6016 | 0.3889 | 0.5509 | 0.3026 | 0.235  |
| 13.25 | 0.9301 | 0.8269 | 0.6426 | 0.8768 | 0.8098 | 0.6941 | 0.6248 | 0.3971 | 0.5769 | 0.3131 | 0.2396 |
| 13.5  | 0.9508 | 0.849  | 0.6665 | 0.8997 | 0.8367 | 0.7216 | 0.6452 | 0.4053 | 0.6028 | 0.3246 | 0.2451 |
| 13.75 | 0.9679 | 0.8707 | 0.6913 | 0.922  | 0.8597 | 0.7516 | 0.6673 | 0.4135 | 0.628  | 0.3348 | 0.2504 |
| 14    | 0.986  | 0.8918 | 0.7152 | 0.9451 | 0.8869 | 0.7803 | 0.6839 | 0.4177 | 0.6566 | 0.3454 | 0.2559 |
| 14.25 | 1.0047 | 0.9106 | 0.7372 | 0.9697 | 0.9108 | 0.808  | 0.7032 | 0.4263 | 0.6816 | 0.3555 | 0.2625 |
| 14.5  | 1.0233 | 0.9308 | 0.7608 | 0.9925 | 0.9344 | 0.8339 | 0.7233 | 0.4358 | 0.7079 | 0.3677 | 0.2664 |
| 14.75 | 1.0397 | 0.9491 | 0.7825 | 1.0133 | 0.9542 | 0.8594 | 0.7401 | 0.4428 | 0.7346 | 0.3783 | 0.2726 |
| 15    | 1.0577 | 0.966  | 0.8057 | 1.0363 | 0.9757 | 0.8843 | 0.7596 | 0.4534 | 0.7595 | 0.3905 | 0.2771 |
| 15.25 | 1.0753 | 0.9853 | 0.8251 | 1.0593 | 0.9982 | 0.9092 | 0.7768 | 0.4608 | 0.7862 | 0.4009 | 0.2803 |
| 15.5  | 1.0897 | 1.0015 | 0.8439 | 1.0801 | 1.0203 | 0.9348 | 0.8132 | 0.4717 | 0.8095 | 0.4137 | 0.2837 |
| 15.75 | 1.1049 | 1.0198 | 0.8628 | 1.1008 | 1.038  | 0.9583 | 0.8245 | 0.4807 | 0.8322 | 0.4262 | 0.2891 |
| 16    | 1.1171 | 1.031  | 0.8817 | 1.11   | 1.0446 | 0.9706 | 0.8399 | 0.4879 | 0.8491 | 0.4369 | 0.295  |
| 16.25 | 1.1316 | 1.0487 | 0.8996 | 1.1264 | 1.0544 | 0.9851 | 0.8515 | 0.4988 | 0.8724 | 0.4482 | 0.3008 |
| 16.5  | 1.1443 | 1.0637 | 0.9165 | 1.1418 | 1.0679 | 1.0044 | 0.8692 | 0.5084 | 0.8949 | 0.4617 | 0.3072 |
| 16.75 | 1.1579 | 1.0806 | 0.9342 | 1.1564 | 1.084  | 1.0247 | 0.8895 | 0.518  | 0.9153 | 0.4758 | 0.3139 |
| 17    | 1.1715 | 1.0952 | 0.9517 | 1.1712 | 1.0968 | 1.0423 | 0.9067 | 0.5279 | 0.9346 | 0.4907 | 0.3207 |
| 17.25 | 1.1858 | 1.1114 | 0.9682 | 1.187  | 1.1115 | 1.0617 | 0.9249 | 0.5381 | 0.953  | 0.5047 | 0.3285 |
| 17.5  | 1.2004 | 1.1256 | 0.9855 | 1.202  | 1.1257 | 1.0758 | 0.941  | 0.5479 | 0.9705 | 0.5211 | 0.3353 |
| 17.75 | 1.2123 | 1.1388 | 1.0016 | 1.215  | 1.1381 | 1.0924 | 0.9591 | 0.5577 | 0.9886 | 0.5358 | 0.343  |

|       |        |        |        |        |        |        |        |        |        |        |        |
|-------|--------|--------|--------|--------|--------|--------|--------|--------|--------|--------|--------|
| 18    | 1.2261 | 1.1522 | 1.015  | 1.2286 | 1.1496 | 1.1061 | 0.9765 | 0.5677 | 1.0027 | 0.5517 | 0.3499 |
| 18.25 | 1.239  | 1.1664 | 1.0307 | 1.2403 | 1.1644 | 1.1197 | 0.9943 | 0.5781 | 1.021  | 0.5652 | 0.3572 |
| 18.5  | 1.251  | 1.1779 | 1.0478 | 1.2532 | 1.1752 | 1.1329 | 1.0125 | 0.5877 | 1.035  | 0.5809 | 0.3654 |
| 18.75 | 1.2641 | 1.1907 | 1.0607 | 1.2644 | 1.1859 | 1.1452 | 1.0291 | 0.5985 | 1.0486 | 0.5963 | 0.3739 |
| 19    | 1.2773 | 1.2018 | 1.0765 | 1.2778 | 1.199  | 1.1584 | 1.0435 | 0.6083 | 1.0636 | 0.6117 | 0.3812 |
| 19.25 | 1.2907 | 1.2145 | 1.0891 | 1.288  | 1.2089 | 1.1697 | 1.0596 | 0.619  | 1.0775 | 0.6274 | 0.3899 |
| 19.5  | 1.3032 | 1.2259 | 1.1041 | 1.3005 | 1.2165 | 1.1828 | 1.076  | 0.6292 | 1.092  | 0.6431 | 0.3974 |
| 19.75 | 1.3141 | 1.239  | 1.1166 | 1.3121 | 1.2286 | 1.1945 | 1.0904 | 0.6379 | 1.102  | 0.658  | 0.4049 |
| 20    | 1.3251 | 1.2497 | 1.1283 | 1.3241 | 1.2401 | 1.2043 | 1.1043 | 0.6487 | 1.1168 | 0.6744 | 0.4125 |
| 20.25 | 1.3374 | 1.2637 | 1.1419 | 1.3345 | 1.2501 | 1.2154 | 1.1202 | 0.6582 | 1.1279 | 0.6892 | 0.4207 |
| 20.5  | 1.3474 | 1.2743 | 1.1521 | 1.345  | 1.2618 | 1.2258 | 1.1335 | 0.6678 | 1.1413 | 0.7024 | 0.4283 |
| 20.75 | 1.3589 | 1.2848 | 1.1637 | 1.3537 | 1.2682 | 1.2332 | 1.1497 | 0.6768 | 1.1539 | 0.7163 | 0.4367 |
| 21    | 1.3704 | 1.2956 | 1.1744 | 1.3646 | 1.2774 | 1.2431 | 1.1604 | 0.6874 | 1.1634 | 0.7318 | 0.4452 |
| 21.25 | 1.3806 | 1.3083 | 1.1829 | 1.3742 | 1.2885 | 1.2538 | 1.1766 | 0.697  | 1.1719 | 0.7458 | 0.4533 |
| 21.5  | 1.39   | 1.3184 | 1.1906 | 1.384  | 1.2974 | 1.2641 | 1.1902 | 0.7062 | 1.1839 | 0.7589 | 0.4615 |
| 21.75 | 1.3999 | 1.3289 | 1.2037 | 1.3945 | 1.305  | 1.2734 | 1.2022 | 0.7155 | 1.1923 | 0.7704 | 0.4695 |
| 22    | 1.4093 | 1.3395 | 1.2116 | 1.4039 | 1.3129 | 1.2805 | 1.2174 | 0.7252 | 1.2017 | 0.7847 | 0.4763 |
| 22.25 | 1.4189 | 1.3493 | 1.2223 | 1.4114 | 1.3227 | 1.2887 | 1.2304 | 0.7353 | 1.2136 | 0.798  | 0.4857 |
| 22.5  | 1.4278 | 1.3589 | 1.2316 | 1.4218 | 1.3314 | 1.2955 | 1.2437 | 0.7448 | 1.2238 | 0.8092 | 0.494  |
| 22.75 | 1.4356 | 1.369  | 1.2391 | 1.4303 | 1.3383 | 1.3035 | 1.2559 | 0.7534 | 1.2319 | 0.8208 | 0.5018 |
| 23    | 1.4425 | 1.3781 | 1.2485 | 1.4376 | 1.3473 | 1.3122 | 1.2681 | 0.7625 | 1.2393 | 0.8315 | 0.5104 |
| 23.25 | 1.4488 | 1.3861 | 1.257  | 1.4462 | 1.3546 | 1.3207 | 1.2802 | 0.7718 | 1.2501 | 0.8408 | 0.5166 |
| 23.5  | 1.4527 | 1.3947 | 1.2667 | 1.4528 | 1.3633 | 1.3277 | 1.2941 | 0.7811 | 1.2574 | 0.8502 | 0.5248 |
| 23.75 | 1.4559 | 1.4037 | 1.2752 | 1.4596 | 1.3708 | 1.3357 | 1.306  | 0.7913 | 1.2653 | 0.8613 | 0.5341 |
| 24    | 1.4583 | 1.4119 | 1.2845 | 1.4669 | 1.3788 | 1.344  | 1.3172 | 0.7998 | 1.2753 | 0.8701 | 0.5411 |
| 24.25 | 1.4609 | 1.4188 | 1.2937 | 1.4757 | 1.3859 | 1.352  | 1.3288 | 0.8075 | 1.282  | 0.8784 | 0.5485 |
| 24.5  | 1.4615 | 1.4276 | 1.3014 | 1.4807 | 1.3912 | 1.3605 | 1.3395 | 0.8166 | 1.2889 | 0.8849 | 0.555  |
| 24.75 | 1.4635 | 1.4341 | 1.3101 | 1.4877 | 1.3968 | 1.3673 | 1.3504 | 0.8272 | 1.2972 | 0.8923 | 0.5621 |
| 25    | 1.466  | 1.4379 | 1.3177 | 1.4935 | 1.4051 | 1.3748 | 1.3604 | 0.8366 | 1.3015 | 0.9008 | 0.5705 |
| 25.25 | 1.4669 | 1.4431 | 1.3269 | 1.4985 | 1.4112 | 1.3819 | 1.3696 | 0.8459 | 1.3118 | 0.907  | 0.5771 |
| 25.5  | 1.4687 | 1.4476 | 1.3358 | 1.503  | 1.4165 | 1.3883 | 1.3801 | 0.8562 | 1.3173 | 0.9165 | 0.5847 |
| 25.75 | 1.4687 | 1.4518 | 1.345  | 1.5075 | 1.4238 | 1.3959 | 1.3881 | 0.8647 | 1.3244 | 0.9222 | 0.5902 |
| 26    | 1.4682 | 1.453  | 1.3526 | 1.5115 | 1.4282 | 1.4033 | 1.3981 | 0.8735 | 1.3305 | 0.9279 | 0.5962 |
| 26.25 | 1.4704 | 1.4557 | 1.3577 | 1.5141 | 1.4324 | 1.4078 | 1.4054 | 0.8844 | 1.3362 | 0.9356 | 0.601  |
| 26.5  | 1.4702 | 1.4595 | 1.368  | 1.5178 | 1.4364 | 1.4169 | 1.415  | 0.8943 | 1.3456 | 0.9413 | 0.6091 |
| 26.75 | 1.4706 | 1.4619 | 1.3756 | 1.5188 | 1.44   | 1.4234 | 1.4224 | 0.9037 | 1.3518 | 0.947  | 0.6131 |
| 27    | 1.4716 | 1.4639 | 1.3808 | 1.5203 | 1.4424 | 1.4285 | 1.4303 | 0.9129 | 1.3593 | 0.9515 | 0.6188 |
| 27.25 | 1.4725 | 1.4677 | 1.3894 | 1.5209 | 1.445  | 1.4359 | 1.4374 | 0.9226 | 1.3681 | 0.9583 | 0.6247 |
| 27.5  | 1.473  | 1.4709 | 1.396  | 1.5217 | 1.4461 | 1.442  | 1.4445 | 0.9328 | 1.3725 | 0.9631 | 0.6288 |
| 27.75 | 1.4747 | 1.4735 | 1.4025 | 1.5227 | 1.448  | 1.4492 | 1.4525 | 0.9414 | 1.3815 | 0.9691 | 0.6338 |
| 28    | 1.4747 | 1.4758 | 1.4095 | 1.5223 | 1.4479 | 1.455  | 1.4592 | 0.9522 | 1.3863 | 0.9744 | 0.6382 |
| 28.25 | 1.4772 | 1.4784 | 1.4156 | 1.5223 | 1.4493 | 1.4614 | 1.4637 | 0.9637 | 1.3947 | 0.982  | 0.6436 |

|       |        |        |        |        |        |        |        |        |        |        |        |
|-------|--------|--------|--------|--------|--------|--------|--------|--------|--------|--------|--------|
| 28.5  | 1.4758 | 1.4806 | 1.4201 | 1.5204 | 1.4487 | 1.4671 | 1.4687 | 0.973  | 1.3998 | 0.9871 | 0.6479 |
| 28.75 | 1.4763 | 1.4813 | 1.4239 | 1.52   | 1.4483 | 1.4745 | 1.4737 | 0.9827 | 1.4072 | 0.9932 | 0.6521 |
| 29    | 1.4771 | 1.4829 | 1.4289 | 1.52   | 1.4482 | 1.4788 | 1.475  | 0.9909 | 1.413  | 0.9987 | 0.6552 |
| 29.25 | 1.4786 | 1.485  | 1.4341 | 1.5199 | 1.4471 | 1.4858 | 1.4785 | 1.0019 | 1.4199 | 1.0033 | 0.6615 |
| 29.5  | 1.4803 | 1.4861 | 1.4367 | 1.52   | 1.4478 | 1.4907 | 1.4784 | 1.0116 | 1.4273 | 1.0096 | 0.6651 |
| 29.75 | 1.4807 | 1.4866 | 1.4387 | 1.5194 | 1.446  | 1.4959 | 1.4802 | 1.0204 | 1.4314 | 1.0151 | 0.6705 |
| 30    | 1.4823 | 1.4892 | 1.4412 | 1.5181 | 1.4469 | 1.5008 | 1.4821 | 1.0316 | 1.4384 | 1.0208 | 0.6743 |
| 30.25 | 1.4831 | 1.49   | 1.4444 | 1.5178 | 1.4478 | 1.506  | 1.4825 | 1.0401 | 1.4419 | 1.0253 | 0.6788 |
| 30.5  | 1.4829 | 1.4913 | 1.4444 | 1.5175 | 1.4478 | 1.5118 | 1.4815 | 1.0505 | 1.4475 | 1.0311 | 0.6824 |
| 30.75 | 1.4823 | 1.4923 | 1.4446 | 1.5175 | 1.4471 | 1.5153 | 1.4808 | 1.0591 | 1.4513 | 1.0363 | 0.6858 |
| 31    | 1.4825 | 1.4929 | 1.4466 | 1.516  | 1.4464 | 1.52   | 1.4798 | 1.0691 | 1.4539 | 1.042  | 0.6912 |
| 31.25 | 1.4843 | 1.4939 | 1.448  | 1.5151 | 1.4466 | 1.5232 | 1.4808 | 1.0773 | 1.4582 | 1.0484 | 0.694  |
| 31.5  | 1.4842 | 1.496  | 1.4475 | 1.5152 | 1.4474 | 1.5266 | 1.4794 | 1.0868 | 1.4634 | 1.0542 | 0.6984 |
| 31.75 | 1.4837 | 1.4956 | 1.4475 | 1.5147 | 1.4474 | 1.5287 | 1.4793 | 1.0962 | 1.4653 | 1.0603 | 0.7029 |
| 32    | 1.4837 | 1.4964 | 1.4488 | 1.5146 | 1.4464 | 1.5324 | 1.4781 | 1.1052 | 1.4707 | 1.0654 | 0.7074 |
| 32.25 | 1.4847 | 1.4969 | 1.4483 | 1.5151 | 1.4462 | 1.5343 | 1.4792 | 1.1141 | 1.4741 | 1.0718 | 0.7126 |
| 32.5  | 1.4848 | 1.4964 | 1.448  | 1.5133 | 1.446  | 1.5353 | 1.478  | 1.1218 | 1.4774 | 1.077  | 0.7151 |
| 32.75 | 1.4858 | 1.4974 | 1.448  | 1.5127 | 1.4449 | 1.5371 | 1.4769 | 1.131  | 1.48   | 1.0818 | 0.7217 |
| 33    | 1.4867 | 1.4992 | 1.4467 | 1.5118 | 1.4443 | 1.538  | 1.4772 | 1.1411 | 1.4833 | 1.0866 | 0.7257 |
| 33.25 | 1.4876 | 1.498  | 1.4476 | 1.5114 | 1.4446 | 1.5386 | 1.4765 | 1.1496 | 1.4855 | 1.0927 | 0.731  |
| 33.5  | 1.4885 | 1.4993 | 1.4481 | 1.5119 | 1.4445 | 1.5396 | 1.4767 | 1.1588 | 1.4874 | 1.0994 | 0.7361 |
| 33.75 | 1.4883 | 1.4994 | 1.4469 | 1.5103 | 1.4427 | 1.5394 | 1.4752 | 1.1691 | 1.4863 | 1.1045 | 0.7402 |
| 34    | 1.4888 | 1.4988 | 1.4474 | 1.5107 | 1.4438 | 1.5396 | 1.4738 | 1.1775 | 1.4865 | 1.1117 | 0.7452 |
| 34.25 | 1.4892 | 1.4995 | 1.4471 | 1.5102 | 1.4434 | 1.5412 | 1.4745 | 1.185  | 1.4873 | 1.118  | 0.7515 |
| 34.5  | 1.4899 | 1.4996 | 1.4474 | 1.5095 | 1.4433 | 1.5421 | 1.4736 | 1.1927 | 1.4888 | 1.1249 | 0.7558 |
| 34.75 | 1.4919 | 1.5003 | 1.4472 | 1.5099 | 1.443  | 1.5414 | 1.4734 | 1.202  | 1.4896 | 1.1307 | 0.7622 |
| 35    | 1.492  | 1.5014 | 1.4486 | 1.509  | 1.4433 | 1.5422 | 1.4738 | 1.2113 | 1.4892 | 1.1375 | 0.7661 |
| 35.25 | 1.4922 | 1.502  | 1.4486 | 1.5082 | 1.4422 | 1.5427 | 1.4734 | 1.2203 | 1.489  | 1.1447 | 0.7709 |
| 35.5  | 1.4933 | 1.5004 | 1.4477 | 1.5075 | 1.4419 | 1.5427 | 1.4729 | 1.2281 | 1.4896 | 1.1496 | 0.7765 |
| 35.75 | 1.4939 | 1.5019 | 1.4479 | 1.507  | 1.4411 | 1.5432 | 1.4727 | 1.2362 | 1.49   | 1.1565 | 0.7813 |
| 36    | 1.4951 | 1.5018 | 1.4476 | 1.5064 | 1.4411 | 1.5428 | 1.4724 | 1.2446 | 1.4894 | 1.1629 | 0.787  |
| 36.25 | 1.4965 | 1.5015 | 1.4469 | 1.5059 | 1.4406 | 1.5425 | 1.4717 | 1.2526 | 1.4896 | 1.1673 | 0.7922 |
| 36.5  | 1.4976 | 1.5021 | 1.4473 | 1.5066 | 1.4401 | 1.5439 | 1.471  | 1.2596 | 1.4907 | 1.173  | 0.7967 |
| 36.75 | 1.4983 | 1.5037 | 1.4481 | 1.5078 | 1.4424 | 1.5457 | 1.4712 | 1.2663 | 1.4894 | 1.1797 | 0.8035 |
| 37    | 1.4992 | 1.5034 | 1.4477 | 1.5055 | 1.4411 | 1.5441 | 1.4695 | 1.2735 | 1.4897 | 1.1851 | 0.808  |
| 37.25 | 1.4997 | 1.504  | 1.449  | 1.5052 | 1.4404 | 1.5449 | 1.4698 | 1.281  | 1.4893 | 1.1902 | 0.8137 |
| 37.5  | 1.5011 | 1.5037 | 1.4489 | 1.504  | 1.44   | 1.5446 | 1.4714 | 1.2889 | 1.4897 | 1.1971 | 0.8197 |
| 37.75 | 1.502  | 1.505  | 1.4486 | 1.5044 | 1.4398 | 1.5458 | 1.4701 | 1.2968 | 1.4897 | 1.2028 | 0.8239 |
| 38    | 1.5029 | 1.5047 | 1.4475 | 1.504  | 1.4397 | 1.5452 | 1.4696 | 1.3046 | 1.4881 | 1.2087 | 0.8287 |
| 38.25 | 1.5029 | 1.5046 | 1.449  | 1.5038 | 1.4392 | 1.5446 | 1.4686 | 1.3106 | 1.4879 | 1.2156 | 0.8352 |
| 38.5  | 1.504  | 1.505  | 1.4481 | 1.5033 | 1.4387 | 1.5448 | 1.4688 | 1.3175 | 1.4875 | 1.2221 | 0.8393 |
| 38.75 | 1.5035 | 1.5042 | 1.448  | 1.5029 | 1.4374 | 1.5448 | 1.4687 | 1.324  | 1.4882 | 1.2297 | 0.8463 |



|       |        |        |        |        |        |        |        |        |        |        |        |
|-------|--------|--------|--------|--------|--------|--------|--------|--------|--------|--------|--------|
| 39    | 1.5042 | 1.505  | 1.4488 | 1.5021 | 1.438  | 1.5456 | 1.4675 | 1.331  | 1.4883 | 1.233  | 0.8507 |
| 39.25 | 1.5058 | 1.5049 | 1.4482 | 1.5016 | 1.4381 | 1.5459 | 1.4679 | 1.3375 | 1.4865 | 1.2401 | 0.856  |
| 39.5  | 1.507  | 1.5052 | 1.4485 | 1.5022 | 1.4373 | 1.5455 | 1.468  | 1.3454 | 1.4861 | 1.2462 | 0.8618 |
| 39.75 | 1.5073 | 1.506  | 1.4484 | 1.5004 | 1.4359 | 1.5451 | 1.4677 | 1.3515 | 1.4866 | 1.2513 | 0.8681 |
| 40    | 1.5077 | 1.5062 | 1.4489 | 1.5023 | 1.4357 | 1.5454 | 1.4673 | 1.3584 | 1.4854 | 1.2598 | 0.8717 |
| 40.25 | 1.5093 | 1.5063 | 1.4496 | 1.502  | 1.4363 | 1.5457 | 1.4671 | 1.3638 | 1.4858 | 1.2628 | 0.8767 |
| 40.5  | 1.5096 | 1.506  | 1.4489 | 1.5012 | 1.4361 | 1.5451 | 1.4664 | 1.369  | 1.4859 | 1.2686 | 0.8827 |
| 40.75 | 1.5108 | 1.5059 | 1.4494 | 1.5006 | 1.4363 | 1.5458 | 1.4676 | 1.3731 | 1.4846 | 1.2744 | 0.8893 |
| 41    | 1.5129 | 1.5053 | 1.4485 | 1.4995 | 1.4351 | 1.5453 | 1.4676 | 1.3756 | 1.4832 | 1.2813 | 0.8939 |
| 41.25 | 1.5127 | 1.5048 | 1.4491 | 1.5012 | 1.4341 | 1.5453 | 1.4677 | 1.3782 | 1.484  | 1.2859 | 0.8996 |
| 41.5  | 1.513  | 1.5052 | 1.4495 | 1.5002 | 1.4343 | 1.5456 | 1.4666 | 1.3813 | 1.4847 | 1.2927 | 0.9042 |
| 41.75 | 1.513  | 1.5045 | 1.4496 | 1.4996 | 1.4341 | 1.5448 | 1.4679 | 1.3831 | 1.4849 | 1.2994 | 0.9092 |
| 42    | 1.5143 | 1.506  | 1.4492 | 1.4998 | 1.4362 | 1.5445 | 1.4665 | 1.385  | 1.4837 | 1.3048 | 0.9131 |
| 42.25 | 1.5164 | 1.506  | 1.4512 | 1.5003 | 1.4356 | 1.5456 | 1.4693 | 1.3863 | 1.4838 | 1.3106 | 0.9191 |
| 42.5  | 1.5166 | 1.5062 | 1.4516 | 1.5011 | 1.4355 | 1.5455 | 1.4685 | 1.3871 | 1.4827 | 1.3153 | 0.9237 |
| 42.75 | 1.518  | 1.506  | 1.4518 | 1.5002 | 1.434  | 1.5452 | 1.4678 | 1.3854 | 1.4822 | 1.3209 | 0.9296 |
| 43    | 1.5154 | 1.5053 | 1.4522 | 1.5003 | 1.4337 | 1.5469 | 1.469  | 1.3832 | 1.4833 | 1.3271 | 0.9348 |
| 43.25 | 1.5129 | 1.5059 | 1.4522 | 1.5    | 1.436  | 1.5463 | 1.4689 | 1.3831 | 1.4827 | 1.3322 | 0.9395 |
| 43.5  | 1.5111 | 1.5064 | 1.4527 | 1.499  | 1.4348 | 1.5465 | 1.4677 | 1.3819 | 1.4818 | 1.3361 | 0.9457 |
| 43.75 | 1.5114 | 1.5084 | 1.453  | 1.5006 | 1.4348 | 1.5477 | 1.4674 | 1.3808 | 1.4816 | 1.3424 | 0.9514 |
| 44    | 1.5125 | 1.5078 | 1.4529 | 1.5002 | 1.4355 | 1.5472 | 1.4676 | 1.3803 | 1.4814 | 1.347  | 0.9583 |
| 44.25 | 1.5102 | 1.5073 | 1.4529 | 1.5006 | 1.4351 | 1.5474 | 1.4671 | 1.3804 | 1.4822 | 1.3511 | 0.9621 |
| 44.5  | 1.5105 | 1.5065 | 1.4523 | 1.4992 | 1.4361 | 1.5473 | 1.4669 | 1.3784 | 1.481  | 1.3564 | 0.9675 |
| 44.75 | 1.5104 | 1.5065 | 1.454  | 1.5    | 1.4358 | 1.5467 | 1.4689 | 1.378  | 1.4815 | 1.3605 | 0.9725 |
| 45    | 1.5092 | 1.5064 | 1.4543 | 1.499  | 1.4328 | 1.5472 | 1.4686 | 1.3766 | 1.4818 | 1.363  | 0.9757 |
| 45.25 | 1.5105 | 1.5057 | 1.4541 | 1.4997 | 1.4355 | 1.5464 | 1.4676 | 1.3762 | 1.4808 | 1.3684 | 0.9822 |
| 45.5  | 1.5103 | 1.5065 | 1.4557 | 1.4979 | 1.4349 | 1.5467 | 1.4681 | 1.3747 | 1.4807 | 1.3696 | 0.9868 |
| 45.75 | 1.51   | 1.5067 | 1.4559 | 1.4982 | 1.4347 | 1.5468 | 1.4681 | 1.3747 | 1.4814 | 1.3745 | 0.9906 |
| 46    | 1.5108 | 1.5061 | 1.4561 | 1.4988 | 1.436  | 1.5467 | 1.4679 | 1.3749 | 1.4804 | 1.3781 | 0.9961 |
| 46.25 | 1.5109 | 1.5064 | 1.456  | 1.4974 | 1.4352 | 1.5465 | 1.469  | 1.3744 | 1.4795 | 1.3807 | 1.0018 |
| 46.5  | 1.511  | 1.5069 | 1.4571 | 1.4976 | 1.4364 | 1.5475 | 1.4697 | 1.3748 | 1.479  | 1.3841 | 1.0079 |
| 46.75 | 1.511  | 1.5052 | 1.4577 | 1.4957 | 1.4349 | 1.5467 | 1.4689 | 1.3742 | 1.4793 | 1.3843 | 1.0133 |
| 47    | 1.5111 | 1.5059 | 1.4574 | 1.4932 | 1.4351 | 1.5469 | 1.4687 | 1.3732 | 1.4795 | 1.3871 | 1.0168 |
| 47.25 | 1.5102 | 1.5042 | 1.4571 | 1.4922 | 1.4334 | 1.5469 | 1.4698 | 1.3727 | 1.4792 | 1.3877 | 1.0214 |
| 47.5  | 1.5112 | 1.5044 | 1.4583 | 1.492  | 1.4325 | 1.5463 | 1.4699 | 1.3735 | 1.4791 | 1.3894 | 1.0275 |
| 47.75 | 1.5109 | 1.5036 | 1.4575 | 1.4903 | 1.4326 | 1.5474 | 1.4703 | 1.3734 | 1.4792 | 1.3898 | 1.0326 |
| 48    | 1.511  | 1.5046 | 1.4582 | 1.4914 | 1.4335 | 1.5467 | 1.4701 | 1.3723 | 1.4802 | 1.3908 | 1.0368 |
| 48.25 | 1.511  | 1.5042 | 1.4587 | 1.4929 | 1.4335 | 1.5466 | 1.4698 | 1.3726 | 1.4771 | 1.3917 | 1.0426 |
| 48.5  | 1.5111 | 1.504  | 1.4592 | 1.4916 | 1.4326 | 1.547  | 1.4704 | 1.3724 | 1.4777 | 1.3915 | 1.0465 |
| 48.75 | 1.5107 | 1.5019 | 1.4578 | 1.4922 | 1.4329 | 1.5459 | 1.4702 | 1.3718 | 1.4788 | 1.3912 | 1.0513 |
| 49    | 1.5112 | 1.5026 | 1.4586 | 1.4926 | 1.4321 | 1.5464 | 1.4708 | 1.3723 | 1.4778 | 1.3909 | 1.056  |
| 49.25 | 1.5109 | 1.5034 | 1.4604 | 1.4925 | 1.4323 | 1.5464 | 1.4706 | 1.3719 | 1.4772 | 1.3911 | 1.06   |

|       |        |        |        |        |        |        |        |        |        |        |        |
|-------|--------|--------|--------|--------|--------|--------|--------|--------|--------|--------|--------|
| 49.5  | 1.5094 | 1.504  | 1.4603 | 1.4927 | 1.4329 | 1.5462 | 1.4694 | 1.3715 | 1.4769 | 1.3917 | 1.0655 |
| 49.75 | 1.5105 | 1.5038 | 1.4602 | 1.4928 | 1.4333 | 1.5468 | 1.4711 | 1.3711 | 1.4775 | 1.3917 | 1.0707 |

(GA 3)  
(RAD 3)  
DRUG  
3uM  
7uM  
VO 100  
VO 250  
D 3

D 10

D 30

**E17 E18 E19 E20 E21 E22 E23 E24**

| <b>TIME</b> | <b>WT</b> | <b>WT(GA 3)</b> | <b>WT(RAD 3)</b> | <b>NO DRUG</b> | <b>GA 3uM</b> | <b>GA 7uM</b> | <b>NOVO 10</b> | <b>NOVO 250</b> | <b>RAD 3</b> | <b>RAD 10</b> | <b>RAD 30</b> |
|-------------|-----------|-----------------|------------------|----------------|---------------|---------------|----------------|-----------------|--------------|---------------|---------------|
| 0           | 0.1894    | 0.2051          | 0.1892           | 0.1834         | 0.1769        | 0.1827        | 0.2546         | 0.3579          | 0.1742       | 0.204         | 0.1904        |
| 0.25        | 0.1844    | 0.1929          | 0.1812           | 0.1769         | 0.1654        | 0.1705        | 0.2575         | 0.3484          | 0.1617       | 0.1899        | 0.1809        |
| 0.5         | 0.1833    | 0.1912          | 0.1787           | 0.1745         | 0.1614        | 0.1679        | 0.2594         | 0.3405          | 0.1605       | 0.1849        | 0.1766        |
| 0.75        | 0.1838    | 0.189           | 0.1758           | 0.1728         | 0.1601        | 0.1657        | 0.2594         | 0.33            | 0.1592       | 0.1826        | 0.177         |
| 1           | 0.1843    | 0.1877          | 0.1818           | 0.173          | 0.1603        | 0.1649        | 0.2588         | 0.323           | 0.1584       | 0.1819        | 0.1773        |
| 1.25        | 0.1867    | 0.1862          | 0.1836           | 0.1735         | 0.1601        | 0.1653        | 0.259          | 0.3155          | 0.159        | 0.1809        | 0.1768        |

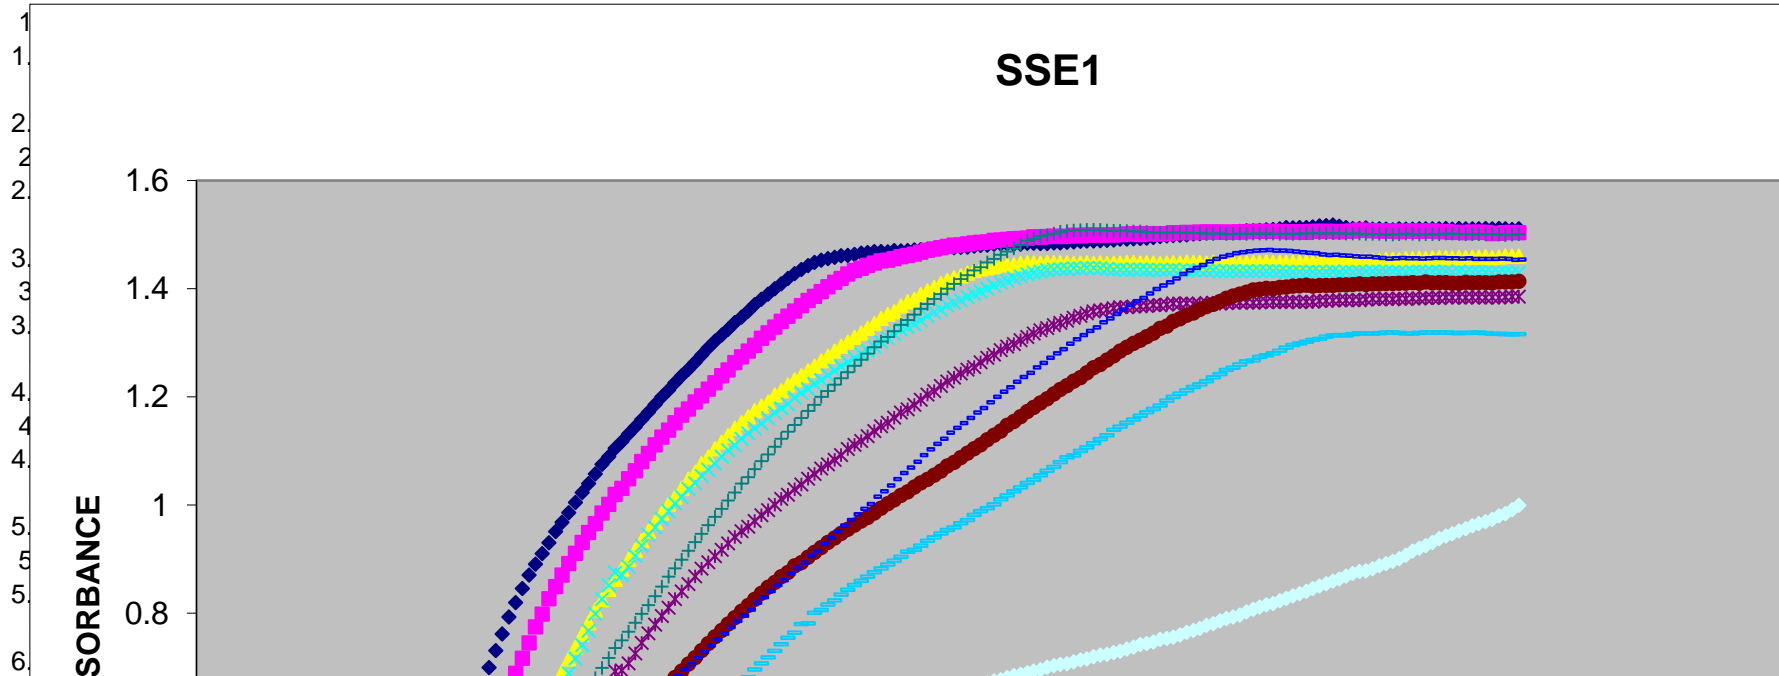

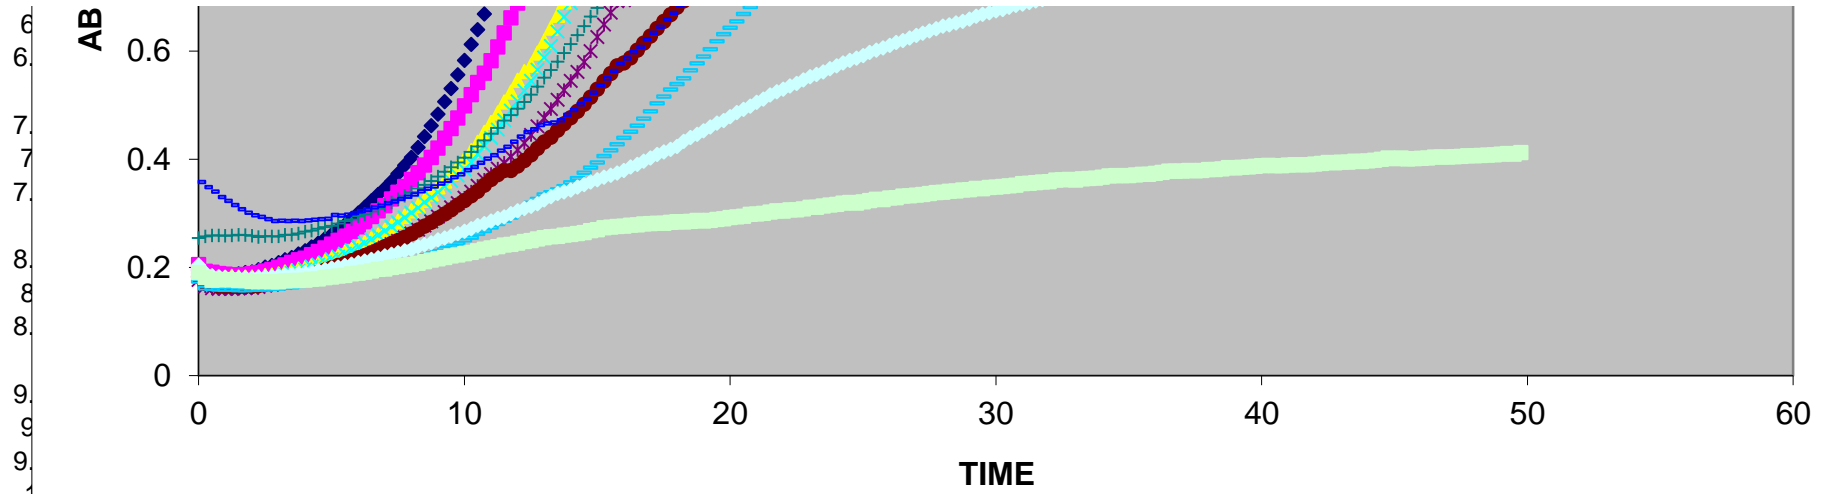

|       |        |        |        |        |        |        |        |        |        |        |        |
|-------|--------|--------|--------|--------|--------|--------|--------|--------|--------|--------|--------|
| 10.5  | 0.6397 | 0.5418 | 0.4316 | 0.4096 | 0.3511 | 0.341  | 0.4239 | 0.3933 | 0.2619 | 0.2773 | 0.2306 |
| 10.75 | 0.6685 | 0.5593 | 0.4497 | 0.425  | 0.3623 | 0.3523 | 0.4347 | 0.4014 | 0.2673 | 0.2811 | 0.2339 |
| 11    | 0.6992 | 0.5825 | 0.4678 | 0.4394 | 0.3729 | 0.3626 | 0.4475 | 0.4076 | 0.2741 | 0.2859 | 0.2361 |
| 11.25 | 0.7307 | 0.6075 | 0.4857 | 0.4548 | 0.3829 | 0.3717 | 0.458  | 0.4161 | 0.2803 | 0.2903 | 0.2383 |
| 11.5  | 0.7614 | 0.6339 | 0.5059 | 0.4721 | 0.3937 | 0.3795 | 0.4717 | 0.4233 | 0.2862 | 0.2938 | 0.2413 |
| 11.75 | 0.7927 | 0.6618 | 0.5242 | 0.4901 | 0.405  | 0.3793 | 0.4819 | 0.4327 | 0.2924 | 0.2993 | 0.2429 |
| 12    | 0.8194 | 0.6889 | 0.5464 | 0.5072 | 0.4171 | 0.3876 | 0.4933 | 0.4423 | 0.3008 | 0.3045 | 0.2447 |
| 12.25 | 0.8459 | 0.7168 | 0.5622 | 0.5269 | 0.4301 | 0.3977 | 0.5062 | 0.4503 | 0.3115 | 0.3092 | 0.2479 |
| 12.5  | 0.8706 | 0.7448 | 0.5743 | 0.5453 | 0.4452 | 0.4083 | 0.5197 | 0.4557 | 0.3195 | 0.3133 | 0.2499 |
| 12.75 | 0.8904 | 0.7744 | 0.5968 | 0.5656 | 0.4608 | 0.4199 | 0.5345 | 0.4635 | 0.3268 | 0.318  | 0.2527 |
| 13    | 0.9099 | 0.7982 | 0.6186 | 0.5881 | 0.4765 | 0.4317 | 0.5507 | 0.4663 | 0.3348 | 0.3247 | 0.2552 |
| 13.25 | 0.9301 | 0.8269 | 0.6426 | 0.6093 | 0.4929 | 0.441  | 0.5651 | 0.4681 | 0.3393 | 0.331  | 0.2569 |
| 13.5  | 0.9508 | 0.849  | 0.6665 | 0.6359 | 0.5104 | 0.4539 | 0.5804 | 0.4721 | 0.3447 | 0.3369 | 0.2576 |
| 13.75 | 0.9679 | 0.8707 | 0.6913 | 0.6636 | 0.5279 | 0.466  | 0.5963 | 0.4823 | 0.3502 | 0.3396 | 0.2598 |
| 14    | 0.986  | 0.8918 | 0.7152 | 0.6887 | 0.5451 | 0.477  | 0.613  | 0.4914 | 0.3573 | 0.3435 | 0.2611 |
| 14.25 | 1.0047 | 0.9106 | 0.7372 | 0.7158 | 0.5614 | 0.4887 | 0.6294 | 0.5021 | 0.3649 | 0.3485 | 0.263  |
| 14.5  | 1.0233 | 0.9308 | 0.7608 | 0.7409 | 0.5802 | 0.5018 | 0.6461 | 0.5115 | 0.3753 | 0.3535 | 0.2644 |
| 14.75 | 1.0397 | 0.9491 | 0.7825 | 0.7675 | 0.6002 | 0.5151 | 0.6637 | 0.5232 | 0.3844 | 0.3582 | 0.2679 |
| 15    | 1.0577 | 0.966  | 0.8057 | 0.7986 | 0.6261 | 0.5297 | 0.6799 | 0.5369 | 0.3944 | 0.3619 | 0.2698 |
| 15.25 | 1.0753 | 0.9853 | 0.8251 | 0.8261 | 0.6489 | 0.5444 | 0.6989 | 0.5499 | 0.4058 | 0.3668 | 0.2733 |
| 15.5  | 1.0897 | 1.0015 | 0.8439 | 0.8514 | 0.6709 | 0.5586 | 0.7172 | 0.5633 | 0.4169 | 0.3703 | 0.2748 |
| 15.75 | 1.1049 | 1.0198 | 0.8628 | 0.8751 | 0.6924 | 0.5727 | 0.7353 | 0.5764 | 0.4278 | 0.3745 | 0.2759 |
| 16    | 1.1171 | 1.031  | 0.8817 | 0.8704 | 0.6942 | 0.5779 | 0.7498 | 0.5862 | 0.4396 | 0.3795 | 0.2766 |
| 16.25 | 1.1316 | 1.0487 | 0.8996 | 0.8861 | 0.7073 | 0.5874 | 0.7656 | 0.598  | 0.4511 | 0.3857 | 0.278  |
| 16.5  | 1.1443 | 1.0637 | 0.9165 | 0.9061 | 0.7258 | 0.6018 | 0.7824 | 0.6079 | 0.4623 | 0.3908 | 0.2786 |
| 16.75 | 1.1579 | 1.0806 | 0.9342 | 0.9248 | 0.7448 | 0.6149 | 0.7991 | 0.6222 | 0.4751 | 0.3966 | 0.2804 |

|       |        |        |        |        |        |        |        |        |        |        |        |
|-------|--------|--------|--------|--------|--------|--------|--------|--------|--------|--------|--------|
| 17    | 1.1715 | 1.0952 | 0.9517 | 0.9448 | 0.7629 | 0.6281 | 0.815  | 0.6337 | 0.4887 | 0.4022 | 0.2811 |
| 17.25 | 1.1858 | 1.1114 | 0.9682 | 0.9589 | 0.7787 | 0.6419 | 0.8317 | 0.6448 | 0.5034 | 0.4089 | 0.2819 |
| 17.5  | 1.2004 | 1.1256 | 0.9855 | 0.9739 | 0.7947 | 0.655  | 0.8492 | 0.6584 | 0.5162 | 0.4139 | 0.2819 |
| 17.75 | 1.2123 | 1.1388 | 1.0016 | 0.9883 | 0.8103 | 0.6675 | 0.8673 | 0.6703 | 0.5292 | 0.4182 | 0.2835 |
| 18    | 1.2261 | 1.1522 | 1.015  | 1.0033 | 0.8259 | 0.6813 | 0.8829 | 0.6839 | 0.5393 | 0.424  | 0.2845 |
| 18.25 | 1.239  | 1.1664 | 1.0307 | 1.0147 | 0.8405 | 0.6932 | 0.8989 | 0.6965 | 0.55   | 0.4334 | 0.2841 |
| 18.5  | 1.251  | 1.1779 | 1.0478 | 1.0298 | 0.8542 | 0.706  | 0.9155 | 0.7055 | 0.5647 | 0.44   | 0.2854 |
| 18.75 | 1.2641 | 1.1907 | 1.0607 | 1.0406 | 0.8682 | 0.7179 | 0.9315 | 0.717  | 0.5775 | 0.4461 | 0.2871 |
| 19    | 1.2773 | 1.2018 | 1.0765 | 1.0539 | 0.8822 | 0.7306 | 0.9471 | 0.7284 | 0.5901 | 0.4528 | 0.2859 |
| 19.25 | 1.2907 | 1.2145 | 1.0891 | 1.0649 | 0.8941 | 0.7441 | 0.9629 | 0.7401 | 0.6035 | 0.4598 | 0.2873 |
| 19.5  | 1.3032 | 1.2259 | 1.1041 | 1.0762 | 0.9055 | 0.756  | 0.9781 | 0.7517 | 0.6185 | 0.4671 | 0.2885 |
| 19.75 | 1.3141 | 1.239  | 1.1166 | 1.0893 | 0.9173 | 0.7683 | 0.9928 | 0.7624 | 0.6317 | 0.4717 | 0.29   |
| 20    | 1.3251 | 1.2497 | 1.1283 | 1.1012 | 0.9292 | 0.7801 | 1.0084 | 0.7744 | 0.6434 | 0.4789 | 0.2922 |
| 20.25 | 1.3374 | 1.2637 | 1.1419 | 1.1102 | 0.9407 | 0.792  | 1.0232 | 0.7858 | 0.655  | 0.4862 | 0.2934 |
| 20.5  | 1.3474 | 1.2743 | 1.1521 | 1.1223 | 0.9515 | 0.8037 | 1.0395 | 0.7953 | 0.6687 | 0.4922 | 0.2945 |
| 20.75 | 1.3589 | 1.2848 | 1.1637 | 1.1325 | 0.9601 | 0.8145 | 1.0518 | 0.8065 | 0.682  | 0.498  | 0.298  |
| 21    | 1.3704 | 1.2956 | 1.1744 | 1.1418 | 0.9708 | 0.8258 | 1.0665 | 0.8194 | 0.6962 | 0.5052 | 0.2988 |
| 21.25 | 1.3806 | 1.3083 | 1.1829 | 1.1505 | 0.9814 | 0.8367 | 1.0811 | 0.8296 | 0.7072 | 0.5114 | 0.3001 |
| 21.5  | 1.39   | 1.3184 | 1.1906 | 1.1605 | 0.9909 | 0.8482 | 1.0938 | 0.8407 | 0.7183 | 0.5189 | 0.3024 |
| 21.75 | 1.3999 | 1.3289 | 1.2037 | 1.1706 | 1.0008 | 0.8569 | 1.1078 | 0.852  | 0.73   | 0.5248 | 0.3046 |
| 22    | 1.4093 | 1.3395 | 1.2116 | 1.1791 | 1.0113 | 0.8674 | 1.1225 | 0.8612 | 0.7426 | 0.5294 | 0.3042 |
| 22.25 | 1.4189 | 1.3493 | 1.2223 | 1.1865 | 1.0193 | 0.8753 | 1.1357 | 0.873  | 0.7543 | 0.5354 | 0.3063 |
| 22.5  | 1.4278 | 1.3589 | 1.2316 | 1.1986 | 1.0293 | 0.8877 | 1.1478 | 0.8832 | 0.7642 | 0.5404 | 0.3065 |
| 22.75 | 1.4356 | 1.369  | 1.2391 | 1.208  | 1.0381 | 0.8937 | 1.1609 | 0.8938 | 0.78   | 0.547  | 0.3086 |
| 23    | 1.4425 | 1.3781 | 1.2485 | 1.2145 | 1.0488 | 0.9037 | 1.1738 | 0.9061 | 0.7814 | 0.5527 | 0.3114 |
| 23.25 | 1.4488 | 1.3861 | 1.257  | 1.2245 | 1.0573 | 0.9127 | 1.1855 | 0.9149 | 0.8006 | 0.557  | 0.3112 |
| 23.5  | 1.4527 | 1.3947 | 1.2667 | 1.2311 | 1.0676 | 0.9215 | 1.2001 | 0.9282 | 0.8062 | 0.5615 | 0.3135 |
| 23.75 | 1.4559 | 1.4037 | 1.2752 | 1.2398 | 1.0755 | 0.9306 | 1.211  | 0.939  | 0.8162 | 0.5677 | 0.3155 |
| 24    | 1.4583 | 1.4119 | 1.2845 | 1.2481 | 1.0835 | 0.9389 | 1.2227 | 0.951  | 0.8239 | 0.5731 | 0.3168 |
| 24.25 | 1.4609 | 1.4188 | 1.2937 | 1.2565 | 1.0925 | 0.9473 | 1.2347 | 0.9622 | 0.8344 | 0.5779 | 0.3187 |
| 24.5  | 1.4615 | 1.4276 | 1.3014 | 1.2642 | 1.1038 | 0.9553 | 1.2459 | 0.972  | 0.8434 | 0.583  | 0.3199 |
| 24.75 | 1.4635 | 1.4341 | 1.3101 | 1.2715 | 1.1112 | 0.9627 | 1.2575 | 0.9827 | 0.8522 | 0.5872 | 0.3192 |
| 25    | 1.466  | 1.4379 | 1.3177 | 1.2786 | 1.1185 | 0.9703 | 1.2689 | 0.9928 | 0.8596 | 0.5918 | 0.3215 |
| 25.25 | 1.4669 | 1.4431 | 1.3269 | 1.2857 | 1.1276 | 0.9771 | 1.2799 | 1.002  | 0.8677 | 0.5976 | 0.3237 |
| 25.5  | 1.4687 | 1.4476 | 1.3358 | 1.2929 | 1.1366 | 0.9854 | 1.2918 | 1.0157 | 0.8761 | 0.6019 | 0.3259 |
| 25.75 | 1.4687 | 1.4518 | 1.345  | 1.3014 | 1.1455 | 0.9944 | 1.3026 | 1.0255 | 0.883  | 0.6062 | 0.3253 |
| 26    | 1.4682 | 1.453  | 1.3526 | 1.3088 | 1.1519 | 1.0024 | 1.3108 | 1.0363 | 0.8901 | 0.611  | 0.3284 |
| 26.25 | 1.4704 | 1.4557 | 1.3577 | 1.3161 | 1.1619 | 1.0096 | 1.3215 | 1.0478 | 0.897  | 0.6158 | 0.3293 |
| 26.5  | 1.4702 | 1.4595 | 1.368  | 1.3241 | 1.1712 | 1.018  | 1.333  | 1.0592 | 0.9042 | 0.6195 | 0.3318 |
| 26.75 | 1.4706 | 1.4619 | 1.3756 | 1.3295 | 1.1773 | 1.0245 | 1.3424 | 1.0695 | 0.9135 | 0.6246 | 0.3323 |
| 27    | 1.4716 | 1.4639 | 1.3808 | 1.3343 | 1.1853 | 1.0333 | 1.3524 | 1.0797 | 0.9175 | 0.6288 | 0.3337 |
| 27.25 | 1.4725 | 1.4677 | 1.3894 | 1.3407 | 1.1949 | 1.0409 | 1.3627 | 1.0924 | 0.9249 | 0.6331 | 0.3348 |

|       |        |        |        |        |        |        |        |        |        |        |        |
|-------|--------|--------|--------|--------|--------|--------|--------|--------|--------|--------|--------|
| 27.5  | 1.473  | 1.4709 | 1.396  | 1.3496 | 1.2042 | 1.0477 | 1.3719 | 1.103  | 0.9336 | 0.6374 | 0.3365 |
| 27.75 | 1.4747 | 1.4735 | 1.4025 | 1.3562 | 1.2106 | 1.055  | 1.3813 | 1.1132 | 0.9402 | 0.6415 | 0.3383 |
| 28    | 1.4747 | 1.4758 | 1.4095 | 1.3613 | 1.22   | 1.0629 | 1.3901 | 1.1226 | 0.9473 | 0.646  | 0.339  |
| 28.25 | 1.4772 | 1.4784 | 1.4156 | 1.3689 | 1.2287 | 1.0725 | 1.4002 | 1.1339 | 0.9542 | 0.6485 | 0.3408 |
| 28.5  | 1.4758 | 1.4806 | 1.4201 | 1.3742 | 1.2358 | 1.0788 | 1.4092 | 1.1426 | 0.9584 | 0.6523 | 0.3416 |
| 28.75 | 1.4763 | 1.4813 | 1.4239 | 1.3789 | 1.2433 | 1.0877 | 1.4178 | 1.1517 | 0.9661 | 0.6551 | 0.3431 |
| 29    | 1.4771 | 1.4829 | 1.4289 | 1.3847 | 1.2502 | 1.0962 | 1.4252 | 1.1613 | 0.9725 | 0.6594 | 0.344  |
| 29.25 | 1.4786 | 1.485  | 1.4341 | 1.3903 | 1.2554 | 1.104  | 1.434  | 1.171  | 0.9815 | 0.6643 | 0.3462 |
| 29.5  | 1.4803 | 1.4861 | 1.4367 | 1.3948 | 1.264  | 1.1112 | 1.44   | 1.1796 | 0.9887 | 0.6683 | 0.3458 |
| 29.75 | 1.4807 | 1.4866 | 1.4387 | 1.4    | 1.2725 | 1.1208 | 1.4486 | 1.1899 | 0.994  | 0.6711 | 0.3479 |
| 30    | 1.4823 | 1.4892 | 1.4412 | 1.4058 | 1.278  | 1.1293 | 1.4554 | 1.2004 | 1.0014 | 0.6744 | 0.3484 |
| 30.25 | 1.4831 | 1.49   | 1.4444 | 1.4111 | 1.2865 | 1.1365 | 1.4627 | 1.2094 | 1.0105 | 0.6771 | 0.3495 |
| 30.5  | 1.4829 | 1.4913 | 1.4444 | 1.4148 | 1.293  | 1.1472 | 1.469  | 1.2178 | 1.0181 | 0.6812 | 0.351  |
| 30.75 | 1.4823 | 1.4923 | 1.4446 | 1.4198 | 1.2979 | 1.1547 | 1.4747 | 1.2281 | 1.0258 | 0.6844 | 0.3524 |
| 31    | 1.4825 | 1.4929 | 1.4466 | 1.4231 | 1.3049 | 1.1632 | 1.4812 | 1.2367 | 1.0328 | 0.6872 | 0.355  |
| 31.25 | 1.4843 | 1.4939 | 1.448  | 1.4269 | 1.3107 | 1.1726 | 1.4883 | 1.2444 | 1.0408 | 0.6901 | 0.3557 |
| 31.5  | 1.4842 | 1.496  | 1.4475 | 1.4297 | 1.3174 | 1.1806 | 1.492  | 1.2547 | 1.0471 | 0.6929 | 0.3566 |
| 31.75 | 1.4837 | 1.4956 | 1.4475 | 1.4317 | 1.3231 | 1.1886 | 1.4969 | 1.2626 | 1.0551 | 0.6956 | 0.3582 |
| 32    | 1.4837 | 1.4964 | 1.4488 | 1.4343 | 1.3276 | 1.1965 | 1.4989 | 1.2723 | 1.0635 | 0.7002 | 0.3585 |
| 32.25 | 1.4847 | 1.4969 | 1.4483 | 1.4357 | 1.3329 | 1.2057 | 1.5021 | 1.2807 | 1.0703 | 0.703  | 0.3614 |
| 32.5  | 1.4848 | 1.4964 | 1.448  | 1.4362 | 1.3371 | 1.2135 | 1.5057 | 1.2883 | 1.0792 | 0.7052 | 0.362  |
| 32.75 | 1.4858 | 1.4974 | 1.448  | 1.4368 | 1.3408 | 1.2208 | 1.5065 | 1.2981 | 1.0882 | 0.7064 | 0.3627 |
| 33    | 1.4867 | 1.4992 | 1.4467 | 1.4378 | 1.3464 | 1.2291 | 1.5079 | 1.3064 | 1.0921 | 0.7104 | 0.3618 |
| 33.25 | 1.4876 | 1.498  | 1.4476 | 1.4371 | 1.3501 | 1.2356 | 1.5086 | 1.3141 | 1.1003 | 0.7138 | 0.3638 |
| 33.5  | 1.4885 | 1.4993 | 1.4481 | 1.4386 | 1.3547 | 1.2443 | 1.5093 | 1.3221 | 1.1069 | 0.7153 | 0.3648 |
| 33.75 | 1.4883 | 1.4994 | 1.4469 | 1.4383 | 1.3583 | 1.2537 | 1.509  | 1.3287 | 1.1141 | 0.7193 | 0.3652 |
| 34    | 1.4888 | 1.4988 | 1.4474 | 1.4378 | 1.36   | 1.2599 | 1.5088 | 1.3379 | 1.1219 | 0.7225 | 0.367  |
| 34.25 | 1.4892 | 1.4995 | 1.4471 | 1.4367 | 1.3618 | 1.2683 | 1.508  | 1.3452 | 1.1291 | 0.724  | 0.3695 |
| 34.5  | 1.4899 | 1.4996 | 1.4474 | 1.4352 | 1.3638 | 1.276  | 1.5075 | 1.3531 | 1.1394 | 0.7272 | 0.37   |
| 34.75 | 1.4919 | 1.5003 | 1.4472 | 1.4356 | 1.3656 | 1.2847 | 1.5073 | 1.3615 | 1.145  | 0.7294 | 0.3701 |
| 35    | 1.492  | 1.5014 | 1.4486 | 1.4352 | 1.3659 | 1.2918 | 1.5065 | 1.3699 | 1.1522 | 0.7337 | 0.3696 |
| 35.25 | 1.4922 | 1.502  | 1.4486 | 1.4356 | 1.3672 | 1.2989 | 1.506  | 1.377  | 1.1583 | 0.7372 | 0.3709 |
| 35.5  | 1.4933 | 1.5004 | 1.4477 | 1.4359 | 1.3677 | 1.3049 | 1.5062 | 1.3831 | 1.165  | 0.7419 | 0.3723 |
| 35.75 | 1.4939 | 1.5019 | 1.4479 | 1.4351 | 1.3682 | 1.3115 | 1.5051 | 1.3911 | 1.1717 | 0.7436 | 0.3723 |
| 36    | 1.4951 | 1.5018 | 1.4476 | 1.4348 | 1.3697 | 1.3181 | 1.5034 | 1.3997 | 1.1779 | 0.7466 | 0.3741 |
| 36.25 | 1.4965 | 1.5015 | 1.4469 | 1.4347 | 1.3695 | 1.3265 | 1.5038 | 1.4059 | 1.1841 | 0.7513 | 0.376  |
| 36.5  | 1.4976 | 1.5021 | 1.4473 | 1.4346 | 1.3707 | 1.331  | 1.5037 | 1.4121 | 1.1933 | 0.7533 | 0.3781 |
| 36.75 | 1.4983 | 1.5037 | 1.4481 | 1.4358 | 1.3731 | 1.3399 | 1.5037 | 1.419  | 1.2    | 0.7556 | 0.3779 |
| 37    | 1.4992 | 1.5034 | 1.4477 | 1.4339 | 1.3719 | 1.3444 | 1.5039 | 1.4272 | 1.2058 | 0.7601 | 0.3784 |
| 37.25 | 1.4997 | 1.504  | 1.449  | 1.434  | 1.3727 | 1.3508 | 1.5035 | 1.4336 | 1.212  | 0.7648 | 0.3793 |
| 37.5  | 1.5011 | 1.5037 | 1.4489 | 1.4336 | 1.3718 | 1.3554 | 1.503  | 1.4386 | 1.2186 | 0.7684 | 0.3787 |
| 37.75 | 1.502  | 1.505  | 1.4486 | 1.4344 | 1.3714 | 1.3617 | 1.5031 | 1.4437 | 1.2233 | 0.7719 | 0.3793 |



|       |        |        |        |        |        |        |        |        |        |        |        |
|-------|--------|--------|--------|--------|--------|--------|--------|--------|--------|--------|--------|
| 38    | 1.5029 | 1.5047 | 1.4475 | 1.4338 | 1.3733 | 1.3667 | 1.5022 | 1.4506 | 1.2294 | 0.7773 | 0.3809 |
| 38.25 | 1.5029 | 1.5046 | 1.449  | 1.4339 | 1.3739 | 1.371  | 1.5022 | 1.4554 | 1.2363 | 0.7808 | 0.3809 |
| 38.5  | 1.504  | 1.505  | 1.4481 | 1.4318 | 1.3725 | 1.3766 | 1.5025 | 1.4596 | 1.2424 | 0.7859 | 0.3824 |
| 38.75 | 1.5035 | 1.5042 | 1.448  | 1.4323 | 1.3734 | 1.3822 | 1.5015 | 1.4625 | 1.2497 | 0.7902 | 0.3845 |
| 39    | 1.5042 | 1.505  | 1.4488 | 1.4324 | 1.3741 | 1.3866 | 1.5015 | 1.466  | 1.2542 | 0.793  | 0.384  |
| 39.25 | 1.5058 | 1.5049 | 1.4482 | 1.432  | 1.3745 | 1.3898 | 1.5018 | 1.4676 | 1.2598 | 0.7965 | 0.385  |
| 39.5  | 1.507  | 1.5052 | 1.4485 | 1.4324 | 1.3745 | 1.3937 | 1.5015 | 1.4696 | 1.2657 | 0.8022 | 0.3857 |
| 39.75 | 1.5073 | 1.506  | 1.4484 | 1.432  | 1.3743 | 1.3975 | 1.5021 | 1.4703 | 1.2677 | 0.8071 | 0.3869 |
| 40    | 1.5077 | 1.5062 | 1.4489 | 1.4326 | 1.3746 | 1.3987 | 1.5017 | 1.4714 | 1.2743 | 0.8115 | 0.3884 |
| 40.25 | 1.5093 | 1.5063 | 1.4496 | 1.4329 | 1.375  | 1.401  | 1.5022 | 1.4715 | 1.2769 | 0.8155 | 0.389  |
| 40.5  | 1.5096 | 1.506  | 1.4489 | 1.4326 | 1.3757 | 1.4004 | 1.5018 | 1.4704 | 1.2805 | 0.8181 | 0.3884 |
| 40.75 | 1.5108 | 1.5059 | 1.4494 | 1.4322 | 1.3755 | 1.4025 | 1.5014 | 1.4708 | 1.2852 | 0.8233 | 0.3881 |
| 41    | 1.5129 | 1.5053 | 1.4485 | 1.4317 | 1.3754 | 1.403  | 1.5018 | 1.47   | 1.291  | 0.8274 | 0.3892 |
| 41.25 | 1.5127 | 1.5048 | 1.4491 | 1.4316 | 1.3766 | 1.4048 | 1.5014 | 1.469  | 1.2961 | 0.832  | 0.3902 |
| 41.5  | 1.513  | 1.5052 | 1.4495 | 1.4315 | 1.3755 | 1.4052 | 1.5019 | 1.4673 | 1.299  | 0.836  | 0.3902 |
| 41.75 | 1.513  | 1.5045 | 1.4496 | 1.4308 | 1.376  | 1.4065 | 1.5026 | 1.4664 | 1.3016 | 0.8404 | 0.3899 |
| 42    | 1.5143 | 1.506  | 1.4492 | 1.4314 | 1.3761 | 1.4051 | 1.5026 | 1.4656 | 1.3055 | 0.8456 | 0.3913 |
| 42.25 | 1.5164 | 1.506  | 1.4512 | 1.4312 | 1.3777 | 1.4062 | 1.5024 | 1.4635 | 1.3074 | 0.8502 | 0.3926 |
| 42.5  | 1.5166 | 1.5062 | 1.4516 | 1.4309 | 1.3779 | 1.4063 | 1.5027 | 1.4625 | 1.3112 | 0.8544 | 0.394  |
| 42.75 | 1.518  | 1.506  | 1.4518 | 1.4321 | 1.3784 | 1.4061 | 1.5023 | 1.4626 | 1.3139 | 0.8594 | 0.3934 |
| 43    | 1.5154 | 1.5053 | 1.4522 | 1.4305 | 1.3791 | 1.407  | 1.5027 | 1.4619 | 1.3145 | 0.8635 | 0.3945 |
| 43.25 | 1.5129 | 1.5059 | 1.4522 | 1.4315 | 1.379  | 1.407  | 1.502  | 1.461  | 1.3138 | 0.8689 | 0.395  |
| 43.5  | 1.5111 | 1.5064 | 1.4527 | 1.4308 | 1.3791 | 1.4081 | 1.5022 | 1.4597 | 1.3163 | 0.8737 | 0.3963 |
| 43.75 | 1.5114 | 1.5084 | 1.453  | 1.4316 | 1.3791 | 1.4093 | 1.502  | 1.4591 | 1.3176 | 0.877  | 0.396  |
| 44    | 1.5125 | 1.5078 | 1.4529 | 1.4314 | 1.3799 | 1.4081 | 1.5015 | 1.4596 | 1.3172 | 0.8779 | 0.3973 |
| 44.25 | 1.5102 | 1.5073 | 1.4529 | 1.4318 | 1.381  | 1.409  | 1.5011 | 1.4582 | 1.3171 | 0.8824 | 0.3985 |
| 44.5  | 1.5105 | 1.5065 | 1.4523 | 1.4313 | 1.3806 | 1.4091 | 1.5011 | 1.4571 | 1.3176 | 0.8874 | 0.4003 |
| 44.75 | 1.5104 | 1.5065 | 1.454  | 1.4315 | 1.3811 | 1.4094 | 1.5003 | 1.456  | 1.319  | 0.8916 | 0.4023 |
| 45    | 1.5092 | 1.5064 | 1.4543 | 1.4312 | 1.3808 | 1.4094 | 1.5004 | 1.4566 | 1.3192 | 0.8957 | 0.4012 |
| 45.25 | 1.5105 | 1.5057 | 1.4541 | 1.4309 | 1.3818 | 1.4103 | 1.5007 | 1.457  | 1.3183 | 0.9008 | 0.4025 |
| 45.5  | 1.5103 | 1.5065 | 1.4557 | 1.4306 | 1.3813 | 1.4101 | 1.5019 | 1.4566 | 1.3171 | 0.9074 | 0.4008 |
| 45.75 | 1.51   | 1.5067 | 1.4559 | 1.4315 | 1.3822 | 1.4111 | 1.5012 | 1.4566 | 1.3175 | 0.9146 | 0.4014 |
| 46    | 1.5108 | 1.5061 | 1.4561 | 1.4321 | 1.382  | 1.4104 | 1.5004 | 1.456  | 1.3187 | 0.92   | 0.402  |
| 46.25 | 1.5109 | 1.5064 | 1.456  | 1.4315 | 1.3828 | 1.4123 | 1.5009 | 1.4565 | 1.319  | 0.925  | 0.4027 |
| 46.5  | 1.511  | 1.5069 | 1.4571 | 1.4314 | 1.3831 | 1.4105 | 1.5005 | 1.457  | 1.319  | 0.931  | 0.4039 |
| 46.75 | 1.511  | 1.5052 | 1.4577 | 1.4313 | 1.3831 | 1.4112 | 1.5008 | 1.4567 | 1.3189 | 0.9378 | 0.404  |
| 47    | 1.5111 | 1.5059 | 1.4574 | 1.432  | 1.3839 | 1.4113 | 1.5018 | 1.4565 | 1.3188 | 0.9429 | 0.4041 |
| 47.25 | 1.5102 | 1.5042 | 1.4571 | 1.4305 | 1.3838 | 1.4102 | 1.5019 | 1.4561 | 1.3182 | 0.9467 | 0.4049 |
| 47.5  | 1.5112 | 1.5044 | 1.4583 | 1.4322 | 1.384  | 1.4104 | 1.5016 | 1.4558 | 1.3179 | 0.9519 | 0.4055 |
| 47.75 | 1.5109 | 1.5036 | 1.4575 | 1.4299 | 1.3836 | 1.4118 | 1.5006 | 1.4564 | 1.3183 | 0.9562 | 0.4063 |
| 48    | 1.511  | 1.5046 | 1.4582 | 1.4303 | 1.3839 | 1.4109 | 1.501  | 1.4553 | 1.3183 | 0.9616 | 0.4064 |
| 48.25 | 1.511  | 1.5042 | 1.4587 | 1.4301 | 1.3839 | 1.4112 | 1.5009 | 1.4554 | 1.3189 | 0.9656 | 0.4071 |

|       |        |        |        |        |        |        |        |        |        |        |        |
|-------|--------|--------|--------|--------|--------|--------|--------|--------|--------|--------|--------|
| 48.5  | 1.5111 | 1.504  | 1.4592 | 1.4304 | 1.3837 | 1.4114 | 1.501  | 1.455  | 1.318  | 0.9696 | 0.408  |
| 48.75 | 1.5107 | 1.5019 | 1.4578 | 1.4297 | 1.3841 | 1.4109 | 1.5012 | 1.455  | 1.3164 | 0.9737 | 0.4083 |
| 49    | 1.5112 | 1.5026 | 1.4586 | 1.43   | 1.3838 | 1.4126 | 1.5004 | 1.456  | 1.3168 | 0.9797 | 0.4097 |
| 49.25 | 1.5109 | 1.5034 | 1.4604 | 1.43   | 1.3847 | 1.4124 | 1.4992 | 1.4553 | 1.3162 | 0.9841 | 0.4104 |
| 49.5  | 1.5094 | 1.504  | 1.4603 | 1.4294 | 1.3853 | 1.4125 | 1.5    | 1.4536 | 1.3156 | 0.9911 | 0.4098 |
| 49.75 | 1.5105 | 1.5038 | 1.4602 | 1.43   | 1.3853 | 1.4135 | 1.5007 | 1.4541 | 1.3163 | 0.9997 | 0.4123 |

- ◆ WT
- WT(GA 3)
- ▲ WT(RAD 3)
- × NO DRUG
- × GA 3uM
- GA 7uM
- + NOVO 100

- NOVO 250
- RAD 3
- ◆ RAD 10
- RAD 30

|      |        |          |           | D9      | D10    | D11    | D12      | D13      | D14    | D15    | D16    |
|------|--------|----------|-----------|---------|--------|--------|----------|----------|--------|--------|--------|
| TIME | WT     | WT(GA 3) | WT(RAD 3) | NO DRUG | GA 3uM | GA 7uM | NOVO 100 | NOVO 250 | RAD 3  | RAD 10 | RAD 30 |
| 0    | 0.1894 | 0.2051   | 0.1892    | 0.1466  | 0.1402 | 0.1473 | 0.2205   | 0.3214   | 0.1468 | 0.1371 | 0.1439 |
| 0.25 | 0.1844 | 0.1929   | 0.1812    | 0.1425  | 0.1383 | 0.1441 | 0.2217   | 0.3107   | 0.1441 | 0.1366 | 0.1431 |
| 0.5  | 0.1833 | 0.1912   | 0.1787    | 0.1431  | 0.1386 | 0.1445 | 0.2237   | 0.3011   | 0.1444 | 0.1364 | 0.1422 |

|      |        |        |        |        |        |        |        |        |        |        |        |
|------|--------|--------|--------|--------|--------|--------|--------|--------|--------|--------|--------|
| 0.75 | 0.1838 | 0.189  | 0.1758 | 0.1405 | 0.1364 | 0.1454 | 0.2232 | 0.2914 | 0.1428 | 0.1347 | 0.1403 |
| 1    | 0.1843 | 0.1877 | 0.1818 | 0.1411 | 0.1365 | 0.1446 | 0.2227 | 0.2831 | 0.1422 | 0.135  | 0.1396 |
| 1.25 | 0.1867 | 0.1862 | 0.1836 | 0.1407 | 0.137  | 0.1449 | 0.2231 | 0.2784 | 0.1428 | 0.1347 | 0.1396 |

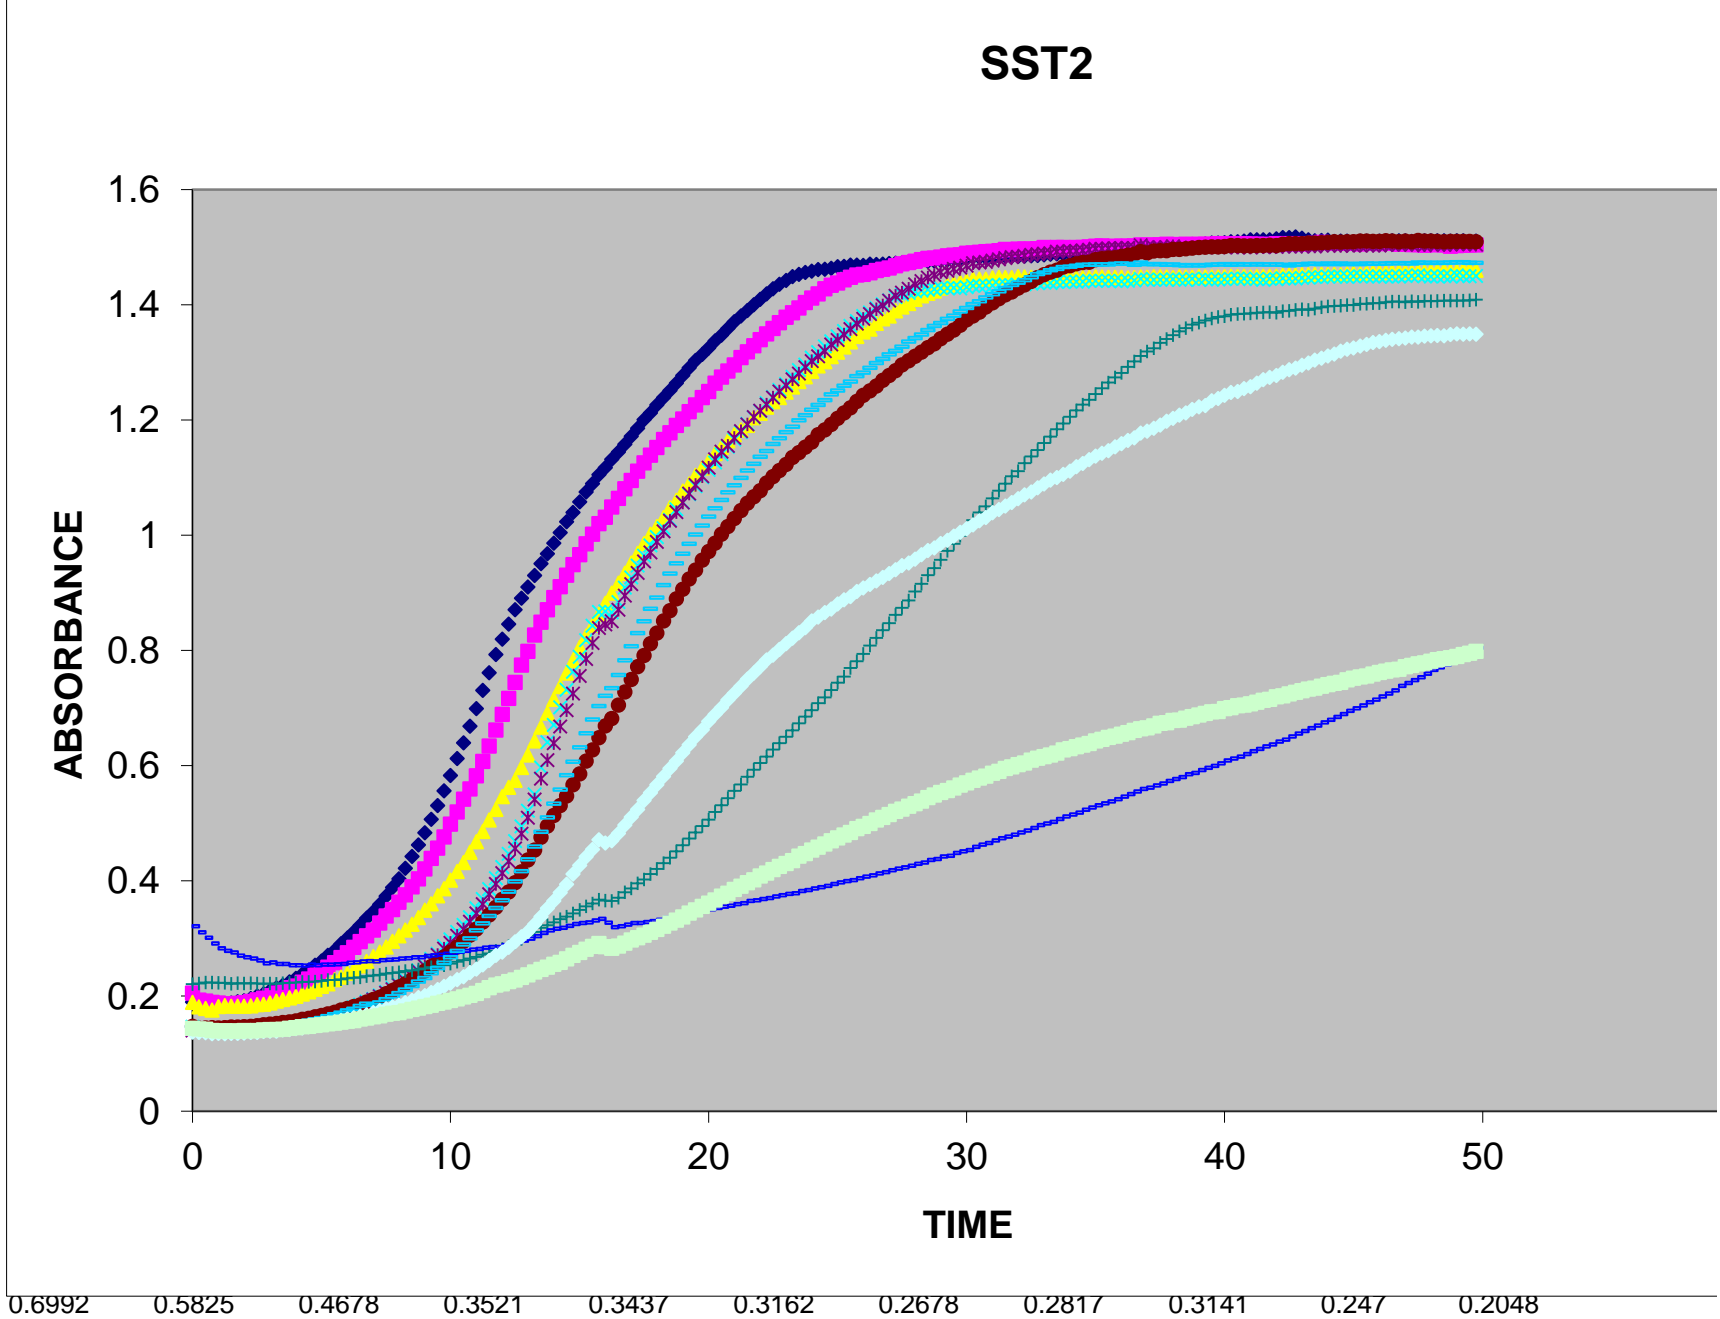

|       |        |        |        |        |        |        |        |        |        |        |        |
|-------|--------|--------|--------|--------|--------|--------|--------|--------|--------|--------|--------|
| 11.25 | 0.7307 | 0.6075 | 0.4857 | 0.3682 | 0.3593 | 0.3287 | 0.272  | 0.2841 | 0.3264 | 0.2541 | 0.2096 |
| 11.5  | 0.7614 | 0.6339 | 0.5059 | 0.3858 | 0.3767 | 0.3408 | 0.274  | 0.2851 | 0.3389 | 0.2616 | 0.2148 |
| 11.75 | 0.7927 | 0.6618 | 0.5242 | 0.4045 | 0.3944 | 0.3539 | 0.2783 | 0.2849 | 0.353  | 0.2708 | 0.2188 |
| 12    | 0.8194 | 0.6889 | 0.5464 | 0.424  | 0.4133 | 0.3677 | 0.282  | 0.2882 | 0.3664 | 0.2762 | 0.221  |
| 12.25 | 0.8459 | 0.7168 | 0.5622 | 0.4465 | 0.4342 | 0.3809 | 0.2867 | 0.2899 | 0.3814 | 0.2844 | 0.2249 |
| 12.5  | 0.8706 | 0.7448 | 0.5743 | 0.469  | 0.4562 | 0.3966 | 0.2927 | 0.2932 | 0.3991 | 0.2941 | 0.2281 |
| 12.75 | 0.8904 | 0.7744 | 0.5968 | 0.4943 | 0.4817 | 0.4159 | 0.2991 | 0.2963 | 0.417  | 0.3031 | 0.2321 |
| 13    | 0.9099 | 0.7982 | 0.6186 | 0.5215 | 0.5097 | 0.436  | 0.3057 | 0.2997 | 0.4376 | 0.312  | 0.2368 |
| 13.25 | 0.9301 | 0.8269 | 0.6426 | 0.5503 | 0.5411 | 0.4534 | 0.311  | 0.3042 | 0.4595 | 0.3243 | 0.2418 |
| 13.5  | 0.9508 | 0.849  | 0.6665 | 0.5966 | 0.5773 | 0.4759 | 0.3182 | 0.3096 | 0.4851 | 0.338  | 0.2463 |
| 13.75 | 0.9679 | 0.8707 | 0.6913 | 0.6409 | 0.6096 | 0.4953 | 0.323  | 0.3142 | 0.5103 | 0.3522 | 0.2502 |
| 14    | 0.986  | 0.8918 | 0.7152 | 0.6707 | 0.6388 | 0.5133 | 0.328  | 0.3167 | 0.5341 | 0.365  | 0.2549 |
| 14.25 | 1.0047 | 0.9106 | 0.7372 | 0.7014 | 0.6681 | 0.5308 | 0.3334 | 0.3187 | 0.5584 | 0.3796 | 0.2585 |
| 14.5  | 1.0233 | 0.9308 | 0.7608 | 0.7319 | 0.6961 | 0.5474 | 0.3379 | 0.322  | 0.5834 | 0.394  | 0.2647 |
| 14.75 | 1.0397 | 0.9491 | 0.7825 | 0.7626 | 0.7252 | 0.5668 | 0.3435 | 0.325  | 0.6068 | 0.4117 | 0.2707 |
| 15    | 1.0577 | 0.966  | 0.8057 | 0.7889 | 0.7558 | 0.5856 | 0.3496 | 0.3268 | 0.6317 | 0.4269 | 0.2757 |
| 15.25 | 1.0753 | 0.9853 | 0.8251 | 0.818  | 0.7853 | 0.608  | 0.3557 | 0.3281 | 0.6562 | 0.4415 | 0.2814 |
| 15.5  | 1.0897 | 1.0015 | 0.8439 | 0.8426 | 0.8127 | 0.6272 | 0.3608 | 0.3311 | 0.6802 | 0.4548 | 0.2863 |
| 15.75 | 1.1049 | 1.0198 | 0.8628 | 0.8668 | 0.8392 | 0.6486 | 0.3671 | 0.3339 | 0.7036 | 0.4712 | 0.2911 |
| 16    | 1.1171 | 1.031  | 0.8817 | 0.8678 | 0.8452 | 0.669  | 0.3655 | 0.3271 | 0.7213 | 0.4659 | 0.2855 |
| 16.25 | 1.1316 | 1.0487 | 0.8996 | 0.8664 | 0.8505 | 0.682  | 0.3652 | 0.3196 | 0.7343 | 0.4696 | 0.2829 |
| 16.5  | 1.1443 | 1.0637 | 0.9165 | 0.8838 | 0.8709 | 0.7051 | 0.3709 | 0.321  | 0.7572 | 0.4821 | 0.287  |
| 16.75 | 1.1579 | 1.0806 | 0.9342 | 0.9087 | 0.8951 | 0.7279 | 0.38   | 0.3239 | 0.7831 | 0.4965 | 0.2917 |
| 17    | 1.1715 | 1.0952 | 0.9517 | 0.9269 | 0.915  | 0.7494 | 0.387  | 0.3266 | 0.8071 | 0.5105 | 0.2976 |
| 17.25 | 1.1858 | 1.1114 | 0.9682 | 0.9475 | 0.9345 | 0.7717 | 0.3954 | 0.3269 | 0.8299 | 0.5242 | 0.3015 |
| 17.5  | 1.2004 | 1.1256 | 0.9855 | 0.9646 | 0.9546 | 0.7914 | 0.4025 | 0.3282 | 0.8504 | 0.5395 | 0.3057 |
| 17.75 | 1.2123 | 1.1388 | 1.0016 | 0.9823 | 0.97   | 0.8119 | 0.4116 | 0.3299 | 0.8721 | 0.5526 | 0.3107 |
| 18    | 1.2261 | 1.1522 | 1.015  | 0.9965 | 0.9884 | 0.8298 | 0.4204 | 0.3321 | 0.8919 | 0.567  | 0.3157 |
| 18.25 | 1.239  | 1.1664 | 1.0307 | 1.0122 | 1.0066 | 0.8513 | 0.4309 | 0.3356 | 0.9134 | 0.5813 | 0.321  |
| 18.5  | 1.251  | 1.1779 | 1.0478 | 1.0269 | 1.0248 | 0.8689 | 0.4402 | 0.3376 | 0.9332 | 0.5952 | 0.3267 |
| 18.75 | 1.2641 | 1.1907 | 1.0607 | 1.0449 | 1.04   | 0.8894 | 0.4513 | 0.3396 | 0.9512 | 0.608  | 0.3316 |
| 19    | 1.2773 | 1.2018 | 1.0765 | 1.057  | 1.0567 | 0.9061 | 0.4617 | 0.3411 | 0.9681 | 0.6225 | 0.3373 |
| 19.25 | 1.2907 | 1.2145 | 1.0891 | 1.0713 | 1.0721 | 0.9239 | 0.4736 | 0.3427 | 0.9852 | 0.6364 | 0.3438 |
| 19.5  | 1.3032 | 1.2259 | 1.1041 | 1.0852 | 1.0875 | 0.9395 | 0.4839 | 0.3453 | 1.0009 | 0.6499 | 0.3493 |
| 19.75 | 1.3141 | 1.239  | 1.1166 | 1.1006 | 1.102  | 0.957  | 0.4949 | 0.3483 | 1.0165 | 0.6624 | 0.3558 |
| 20    | 1.3251 | 1.2497 | 1.1283 | 1.1132 | 1.117  | 0.9719 | 0.506  | 0.3507 | 1.0322 | 0.677  | 0.3611 |
| 20.25 | 1.3374 | 1.2637 | 1.1419 | 1.1259 | 1.1316 | 0.9863 | 0.5197 | 0.3531 | 1.0467 | 0.6889 | 0.3668 |
| 20.5  | 1.3474 | 1.2743 | 1.1521 | 1.1408 | 1.145  | 1.0017 | 0.5313 | 0.3549 | 1.0611 | 0.7005 | 0.3735 |
| 20.75 | 1.3589 | 1.2848 | 1.1637 | 1.1531 | 1.1551 | 1.0151 | 0.5432 | 0.357  | 1.0744 | 0.7137 | 0.3786 |
| 21    | 1.3704 | 1.2956 | 1.1744 | 1.1663 | 1.1688 | 1.0292 | 0.5561 | 0.3598 | 1.0867 | 0.7256 | 0.3849 |
| 21.25 | 1.3806 | 1.3083 | 1.1829 | 1.1787 | 1.1805 | 1.043  | 0.5674 | 0.3615 | 1.0994 | 0.7378 | 0.3908 |
| 21.5  | 1.39   | 1.3184 | 1.1906 | 1.1931 | 1.1924 | 1.0555 | 0.5806 | 0.3652 | 1.1123 | 0.7503 | 0.3967 |

|       |        |        |        |        |        |        |        |        |        |        |        |
|-------|--------|--------|--------|--------|--------|--------|--------|--------|--------|--------|--------|
| 21.75 | 1.3999 | 1.3289 | 1.2037 | 1.2044 | 1.205  | 1.0667 | 0.5929 | 0.3661 | 1.1239 | 0.7608 | 0.4019 |
| 22    | 1.4093 | 1.3395 | 1.2116 | 1.2154 | 1.2159 | 1.0773 | 0.6048 | 0.3683 | 1.1363 | 0.7717 | 0.4085 |
| 22.25 | 1.4189 | 1.3493 | 1.2223 | 1.2295 | 1.2269 | 1.0905 | 0.6158 | 0.3702 | 1.1461 | 0.7834 | 0.4133 |
| 22.5  | 1.4278 | 1.3589 | 1.2316 | 1.24   | 1.239  | 1.1015 | 0.6277 | 0.3729 | 1.1581 | 0.7917 | 0.4195 |
| 22.75 | 1.4356 | 1.369  | 1.2391 | 1.2523 | 1.2496 | 1.1124 | 0.6388 | 0.375  | 1.1681 | 0.8019 | 0.4251 |
| 23    | 1.4425 | 1.3781 | 1.2485 | 1.2627 | 1.26   | 1.123  | 0.6502 | 0.3772 | 1.1787 | 0.8117 | 0.4302 |
| 23.25 | 1.4488 | 1.3861 | 1.257  | 1.2748 | 1.2705 | 1.1353 | 0.6611 | 0.3787 | 1.1884 | 0.8212 | 0.4353 |
| 23.5  | 1.4527 | 1.3947 | 1.2667 | 1.2865 | 1.2808 | 1.1436 | 0.6734 | 0.3823 | 1.1996 | 0.8309 | 0.4431 |
| 23.75 | 1.4559 | 1.4037 | 1.2752 | 1.2962 | 1.2918 | 1.153  | 0.685  | 0.3841 | 1.2082 | 0.8396 | 0.4474 |
| 24    | 1.4583 | 1.4119 | 1.2845 | 1.3086 | 1.3022 | 1.1619 | 0.6962 | 0.3866 | 1.2179 | 0.851  | 0.4533 |
| 24.25 | 1.4609 | 1.4188 | 1.2937 | 1.3177 | 1.3106 | 1.1744 | 0.7086 | 0.3891 | 1.2263 | 0.858  | 0.4586 |
| 24.5  | 1.4615 | 1.4276 | 1.3014 | 1.3279 | 1.3193 | 1.1827 | 0.7186 | 0.3912 | 1.2345 | 0.8655 | 0.4639 |
| 24.75 | 1.4635 | 1.4341 | 1.3101 | 1.3365 | 1.3311 | 1.192  | 0.731  | 0.3947 | 1.2442 | 0.8716 | 0.4696 |
| 25    | 1.466  | 1.4379 | 1.3177 | 1.345  | 1.3388 | 1.2029 | 0.7438 | 0.3974 | 1.2511 | 0.8807 | 0.4743 |
| 25.25 | 1.4669 | 1.4431 | 1.3269 | 1.3544 | 1.3482 | 1.2122 | 0.7548 | 0.3995 | 1.2597 | 0.8879 | 0.4794 |
| 25.5  | 1.4687 | 1.4476 | 1.3358 | 1.3634 | 1.3576 | 1.2209 | 0.7693 | 0.4015 | 1.2666 | 0.8936 | 0.4842 |
| 25.75 | 1.4687 | 1.4518 | 1.345  | 1.3719 | 1.3672 | 1.232  | 0.7814 | 0.4047 | 1.2759 | 0.9022 | 0.4909 |
| 26    | 1.4682 | 1.453  | 1.3526 | 1.3805 | 1.3755 | 1.2427 | 0.7937 | 0.4071 | 1.2823 | 0.9086 | 0.4948 |
| 26.25 | 1.4704 | 1.4557 | 1.3577 | 1.3868 | 1.3839 | 1.2505 | 0.8086 | 0.4096 | 1.2908 | 0.9146 | 0.4996 |
| 26.5  | 1.4702 | 1.4595 | 1.368  | 1.3945 | 1.3922 | 1.259  | 0.8215 | 0.4131 | 1.2991 | 0.9204 | 0.5054 |
| 26.75 | 1.4706 | 1.4619 | 1.3756 | 1.4014 | 1.3991 | 1.2688 | 0.8353 | 0.415  | 1.3063 | 0.9265 | 0.5103 |
| 27    | 1.4716 | 1.4639 | 1.3808 | 1.4077 | 1.4072 | 1.2773 | 0.8474 | 0.4185 | 1.3139 | 0.9335 | 0.5152 |
| 27.25 | 1.4725 | 1.4677 | 1.3894 | 1.4131 | 1.4157 | 1.2858 | 0.8616 | 0.421  | 1.3199 | 0.9402 | 0.5205 |
| 27.5  | 1.473  | 1.4709 | 1.396  | 1.4177 | 1.421  | 1.2954 | 0.8739 | 0.4236 | 1.3274 | 0.9475 | 0.5244 |
| 27.75 | 1.4747 | 1.4735 | 1.4025 | 1.4204 | 1.428  | 1.3029 | 0.887  | 0.4263 | 1.3359 | 0.9518 | 0.5295 |
| 28    | 1.4747 | 1.4758 | 1.4095 | 1.4235 | 1.4354 | 1.3107 | 0.9023 | 0.4293 | 1.3424 | 0.9583 | 0.5339 |
| 28.25 | 1.4772 | 1.4784 | 1.4156 | 1.4246 | 1.4412 | 1.3179 | 0.9158 | 0.4316 | 1.3482 | 0.966  | 0.5385 |
| 28.5  | 1.4758 | 1.4806 | 1.4201 | 1.4264 | 1.4474 | 1.3256 | 0.9305 | 0.4362 | 1.3559 | 0.9735 | 0.5443 |
| 28.75 | 1.4763 | 1.4813 | 1.4239 | 1.4273 | 1.4517 | 1.3325 | 0.943  | 0.4378 | 1.3634 | 0.9781 | 0.5488 |
| 29    | 1.4771 | 1.4829 | 1.4289 | 1.4288 | 1.4566 | 1.3413 | 0.9572 | 0.4422 | 1.3686 | 0.9855 | 0.5534 |
| 29.25 | 1.4786 | 1.485  | 1.4341 | 1.4291 | 1.4591 | 1.349  | 0.9727 | 0.4435 | 1.3753 | 0.9909 | 0.5568 |
| 29.5  | 1.4803 | 1.4861 | 1.4367 | 1.4295 | 1.4625 | 1.3562 | 0.9853 | 0.4484 | 1.3812 | 0.9985 | 0.5613 |
| 29.75 | 1.4807 | 1.4866 | 1.4387 | 1.4285 | 1.4645 | 1.3643 | 0.9992 | 0.4512 | 1.3881 | 1.005  | 0.5661 |
| 30    | 1.4823 | 1.4892 | 1.4412 | 1.4303 | 1.468  | 1.3738 | 1.0119 | 0.4534 | 1.3945 | 1.0113 | 0.5702 |
| 30.25 | 1.4831 | 1.49   | 1.4444 | 1.4326 | 1.472  | 1.3807 | 1.0262 | 0.4589 | 1.4012 | 1.018  | 0.5747 |
| 30.5  | 1.4829 | 1.4913 | 1.4444 | 1.4326 | 1.4732 | 1.3872 | 1.0397 | 0.4628 | 1.4061 | 1.025  | 0.5787 |
| 30.75 | 1.4823 | 1.4923 | 1.4446 | 1.4335 | 1.4742 | 1.3963 | 1.0498 | 0.4655 | 1.413  | 1.0306 | 0.5816 |
| 31    | 1.4825 | 1.4929 | 1.4466 | 1.4331 | 1.4767 | 1.4035 | 1.0642 | 0.4703 | 1.4182 | 1.0391 | 0.5867 |
| 31.25 | 1.4843 | 1.4939 | 1.448  | 1.4338 | 1.4787 | 1.4104 | 1.0775 | 0.4741 | 1.4234 | 1.0445 | 0.5901 |
| 31.5  | 1.4842 | 1.496  | 1.4475 | 1.435  | 1.481  | 1.4172 | 1.0893 | 0.4767 | 1.429  | 1.0506 | 0.5949 |
| 31.75 | 1.4837 | 1.4956 | 1.4475 | 1.4341 | 1.4827 | 1.4225 | 1.1021 | 0.4801 | 1.4343 | 1.0566 | 0.598  |
| 32    | 1.4837 | 1.4964 | 1.4488 | 1.4342 | 1.4833 | 1.429  | 1.1114 | 0.4839 | 1.4381 | 1.0633 | 0.6016 |



|       |        |        |        |        |        |        |        |        |        |        |        |
|-------|--------|--------|--------|--------|--------|--------|--------|--------|--------|--------|--------|
| 32.25 | 1.4847 | 1.4969 | 1.4483 | 1.4353 | 1.4849 | 1.4347 | 1.1248 | 0.4873 | 1.4429 | 1.07   | 0.6047 |
| 32.5  | 1.4848 | 1.4964 | 1.448  | 1.4366 | 1.4867 | 1.4403 | 1.1369 | 0.4915 | 1.4479 | 1.0752 | 0.6097 |
| 32.75 | 1.4858 | 1.4974 | 1.448  | 1.4377 | 1.4879 | 1.4471 | 1.1479 | 0.4965 | 1.4531 | 1.082  | 0.6131 |
| 33    | 1.4867 | 1.4992 | 1.4467 | 1.4384 | 1.4888 | 1.4524 | 1.1599 | 0.4998 | 1.4559 | 1.0889 | 0.6155 |
| 33.25 | 1.4876 | 1.498  | 1.4476 | 1.4376 | 1.4895 | 1.4564 | 1.171  | 0.5024 | 1.4598 | 1.0956 | 0.6186 |
| 33.5  | 1.4885 | 1.4993 | 1.4481 | 1.4394 | 1.4924 | 1.46   | 1.1841 | 0.5072 | 1.4625 | 1.1002 | 0.622  |
| 33.75 | 1.4883 | 1.4994 | 1.4469 | 1.4395 | 1.4921 | 1.4657 | 1.1942 | 0.5118 | 1.4658 | 1.1055 | 0.6274 |
| 34    | 1.4888 | 1.4988 | 1.4474 | 1.4403 | 1.4934 | 1.4678 | 1.2054 | 0.515  | 1.4662 | 1.1111 | 0.6298 |
| 34.25 | 1.4892 | 1.4995 | 1.4471 | 1.4399 | 1.4935 | 1.4711 | 1.2165 | 0.5187 | 1.4678 | 1.1187 | 0.6328 |
| 34.5  | 1.4899 | 1.4996 | 1.4474 | 1.4398 | 1.4943 | 1.4734 | 1.2265 | 0.5233 | 1.4693 | 1.1243 | 0.6357 |
| 34.75 | 1.4919 | 1.5003 | 1.4472 | 1.4415 | 1.4957 | 1.4741 | 1.2349 | 0.5271 | 1.4697 | 1.1309 | 0.6387 |
| 35    | 1.492  | 1.5014 | 1.4486 | 1.4419 | 1.4973 | 1.4785 | 1.2453 | 0.5312 | 1.4702 | 1.1373 | 0.6429 |
| 35.25 | 1.4922 | 1.502  | 1.4486 | 1.4415 | 1.4975 | 1.4798 | 1.2548 | 0.5343 | 1.4702 | 1.1421 | 0.6458 |
| 35.5  | 1.4933 | 1.5004 | 1.4477 | 1.4415 | 1.4977 | 1.4809 | 1.2652 | 0.5378 | 1.4699 | 1.1467 | 0.6492 |
| 35.75 | 1.4939 | 1.5019 | 1.4479 | 1.4414 | 1.4986 | 1.4818 | 1.274  | 0.5419 | 1.4709 | 1.1531 | 0.651  |
| 36    | 1.4951 | 1.5018 | 1.4476 | 1.4407 | 1.4985 | 1.484  | 1.2815 | 0.5462 | 1.4716 | 1.1587 | 0.6546 |
| 36.25 | 1.4965 | 1.5015 | 1.4469 | 1.4416 | 1.4987 | 1.4861 | 1.2924 | 0.5506 | 1.4712 | 1.1645 | 0.6571 |
| 36.5  | 1.4976 | 1.5021 | 1.4473 | 1.4424 | 1.4986 | 1.4877 | 1.3015 | 0.5551 | 1.4694 | 1.1687 | 0.6613 |
| 36.75 | 1.4983 | 1.5037 | 1.4481 | 1.4448 | 1.5036 | 1.4921 | 1.3113 | 0.5596 | 1.4732 | 1.1771 | 0.6641 |
| 37    | 1.4992 | 1.5034 | 1.4477 | 1.4439 | 1.5002 | 1.4902 | 1.3188 | 0.5618 | 1.4707 | 1.1805 | 0.6658 |
| 37.25 | 1.4997 | 1.504  | 1.449  | 1.4436 | 1.4997 | 1.4936 | 1.3243 | 0.5656 | 1.4705 | 1.1854 | 0.6689 |
| 37.5  | 1.5011 | 1.5037 | 1.4489 | 1.4436 | 1.4993 | 1.4938 | 1.3339 | 0.5688 | 1.4704 | 1.1913 | 0.6734 |
| 37.75 | 1.502  | 1.505  | 1.4486 | 1.4435 | 1.4999 | 1.494  | 1.3405 | 0.5733 | 1.4695 | 1.198  | 0.6746 |
| 38    | 1.5029 | 1.5047 | 1.4475 | 1.4443 | 1.5016 | 1.496  | 1.3472 | 0.5767 | 1.4702 | 1.2026 | 0.6782 |
| 38.25 | 1.5029 | 1.5046 | 1.449  | 1.4431 | 1.499  | 1.496  | 1.3538 | 0.5802 | 1.4687 | 1.2086 | 0.679  |
| 38.5  | 1.504  | 1.505  | 1.4481 | 1.4435 | 1.4997 | 1.4975 | 1.3596 | 0.5851 | 1.4686 | 1.2125 | 0.6822 |
| 38.75 | 1.5035 | 1.5042 | 1.448  | 1.4448 | 1.4987 | 1.4982 | 1.3656 | 0.5874 | 1.4689 | 1.2181 | 0.6851 |
| 39    | 1.5042 | 1.505  | 1.4488 | 1.4433 | 1.4992 | 1.4997 | 1.3688 | 0.5922 | 1.4683 | 1.2229 | 0.6878 |
| 39.25 | 1.5058 | 1.5049 | 1.4482 | 1.4448 | 1.5    | 1.4998 | 1.373  | 0.5961 | 1.469  | 1.2253 | 0.6908 |
| 39.5  | 1.507  | 1.5052 | 1.4485 | 1.4431 | 1.5003 | 1.5006 | 1.3762 | 0.5998 | 1.4693 | 1.2332 | 0.6935 |
| 39.75 | 1.5073 | 1.506  | 1.4484 | 1.4438 | 1.4996 | 1.5006 | 1.3788 | 0.6039 | 1.47   | 1.2371 | 0.6941 |
| 40    | 1.5077 | 1.5062 | 1.4489 | 1.4442 | 1.4999 | 1.5012 | 1.38   | 0.6088 | 1.4705 | 1.243  | 0.6987 |
| 40.25 | 1.5093 | 1.5063 | 1.4496 | 1.445  | 1.5008 | 1.5026 | 1.383  | 0.6125 | 1.4697 | 1.2476 | 0.7009 |
| 40.5  | 1.5096 | 1.506  | 1.4489 | 1.4454 | 1.4997 | 1.503  | 1.3837 | 0.6159 | 1.4706 | 1.2497 | 0.704  |
| 40.75 | 1.5108 | 1.5059 | 1.4494 | 1.4453 | 1.4999 | 1.5022 | 1.3842 | 0.6203 | 1.47   | 1.2543 | 0.7051 |
| 41    | 1.5129 | 1.5053 | 1.4485 | 1.4444 | 1.4997 | 1.5022 | 1.3848 | 0.6249 | 1.4702 | 1.2579 | 0.7074 |
| 41.25 | 1.5127 | 1.5048 | 1.4491 | 1.4445 | 1.5009 | 1.503  | 1.3861 | 0.6292 | 1.4708 | 1.2638 | 0.7101 |
| 41.5  | 1.513  | 1.5052 | 1.4495 | 1.4435 | 1.4999 | 1.5028 | 1.3869 | 0.6333 | 1.4699 | 1.2703 | 0.7132 |
| 41.75 | 1.513  | 1.5045 | 1.4496 | 1.4449 | 1.5004 | 1.5036 | 1.3874 | 0.6369 | 1.4699 | 1.274  | 0.7153 |
| 42    | 1.5143 | 1.506  | 1.4492 | 1.4446 | 1.5008 | 1.503  | 1.3864 | 0.6417 | 1.4701 | 1.2774 | 0.7196 |
| 42.25 | 1.5164 | 1.506  | 1.4512 | 1.4461 | 1.5011 | 1.5048 | 1.389  | 0.645  | 1.4694 | 1.2828 | 0.7214 |
| 42.5  | 1.5166 | 1.5062 | 1.4516 | 1.4458 | 1.5015 | 1.5063 | 1.3895 | 0.6506 | 1.4681 | 1.2872 | 0.7246 |

|       |        |        |        |        |        |        |        |        |        |        |        |
|-------|--------|--------|--------|--------|--------|--------|--------|--------|--------|--------|--------|
| 42.75 | 1.518  | 1.506  | 1.4518 | 1.4454 | 1.501  | 1.5059 | 1.391  | 0.6555 | 1.4701 | 1.29   | 0.7272 |
| 43    | 1.5154 | 1.5053 | 1.4522 | 1.4468 | 1.5012 | 1.5061 | 1.392  | 0.66   | 1.4702 | 1.2951 | 0.7299 |
| 43.25 | 1.5129 | 1.5059 | 1.4522 | 1.4475 | 1.5029 | 1.5073 | 1.3913 | 0.6651 | 1.471  | 1.2987 | 0.7328 |
| 43.5  | 1.5111 | 1.5064 | 1.4527 | 1.4486 | 1.5013 | 1.5074 | 1.3936 | 0.6698 | 1.4709 | 1.3039 | 0.7346 |
| 43.75 | 1.5114 | 1.5084 | 1.453  | 1.4479 | 1.5028 | 1.508  | 1.3956 | 0.6751 | 1.4703 | 1.3072 | 0.7379 |
| 44    | 1.5125 | 1.5078 | 1.4529 | 1.449  | 1.5031 | 1.5084 | 1.3971 | 0.6798 | 1.4714 | 1.311  | 0.7404 |
| 44.25 | 1.5102 | 1.5073 | 1.4529 | 1.4493 | 1.5033 | 1.5092 | 1.3979 | 0.6848 | 1.4704 | 1.3144 | 0.7427 |
| 44.5  | 1.5105 | 1.5065 | 1.4523 | 1.4491 | 1.5024 | 1.5089 | 1.3982 | 0.6893 | 1.4716 | 1.3192 | 0.7446 |
| 44.75 | 1.5104 | 1.5065 | 1.454  | 1.4485 | 1.5037 | 1.5094 | 1.3992 | 0.6951 | 1.4703 | 1.3228 | 0.7487 |
| 45    | 1.5092 | 1.5064 | 1.4543 | 1.4496 | 1.5027 | 1.5097 | 1.3997 | 0.6997 | 1.4712 | 1.3249 | 0.7516 |
| 45.25 | 1.5105 | 1.5057 | 1.4541 | 1.4494 | 1.503  | 1.5103 | 1.4016 | 0.7044 | 1.4706 | 1.3285 | 0.7537 |
| 45.5  | 1.5103 | 1.5065 | 1.4557 | 1.4496 | 1.5035 | 1.5108 | 1.4015 | 0.71   | 1.4714 | 1.3314 | 0.7557 |
| 45.75 | 1.51   | 1.5067 | 1.4559 | 1.4491 | 1.5029 | 1.51   | 1.4029 | 0.7143 | 1.471  | 1.3346 | 0.7591 |
| 46    | 1.5108 | 1.5061 | 1.4561 | 1.449  | 1.503  | 1.51   | 1.4027 | 0.7203 | 1.471  | 1.3362 | 0.7616 |
| 46.25 | 1.5109 | 1.5064 | 1.456  | 1.4497 | 1.504  | 1.5109 | 1.4043 | 0.7253 | 1.4716 | 1.3383 | 0.7641 |
| 46.5  | 1.511  | 1.5069 | 1.4571 | 1.4489 | 1.5044 | 1.5107 | 1.4055 | 0.7307 | 1.4721 | 1.3401 | 0.7663 |
| 46.75 | 1.511  | 1.5052 | 1.4577 | 1.4491 | 1.5045 | 1.5097 | 1.4057 | 0.7383 | 1.4721 | 1.3413 | 0.7674 |
| 47    | 1.5111 | 1.5059 | 1.4574 | 1.4502 | 1.505  | 1.5105 | 1.4047 | 0.7433 | 1.4722 | 1.3422 | 0.7716 |
| 47.25 | 1.5102 | 1.5042 | 1.4571 | 1.45   | 1.5043 | 1.5097 | 1.4059 | 0.7486 | 1.4717 | 1.3441 | 0.7739 |
| 47.5  | 1.5112 | 1.5044 | 1.4583 | 1.4513 | 1.5043 | 1.5118 | 1.4052 | 0.7532 | 1.4735 | 1.344  | 0.7766 |
| 47.75 | 1.5109 | 1.5036 | 1.4575 | 1.4495 | 1.5035 | 1.5106 | 1.4066 | 0.7593 | 1.473  | 1.3454 | 0.7785 |
| 48    | 1.511  | 1.5046 | 1.4582 | 1.449  | 1.5048 | 1.5107 | 1.4062 | 0.7661 | 1.4729 | 1.3464 | 0.7812 |
| 48.25 | 1.511  | 1.5042 | 1.4587 | 1.4495 | 1.505  | 1.5099 | 1.4067 | 0.7704 | 1.4726 | 1.3466 | 0.7838 |
| 48.5  | 1.5111 | 1.504  | 1.4592 | 1.4496 | 1.5038 | 1.5095 | 1.4074 | 0.7755 | 1.4728 | 1.3464 | 0.7856 |
| 48.75 | 1.5107 | 1.5019 | 1.4578 | 1.449  | 1.5046 | 1.5099 | 1.4072 | 0.7816 | 1.4732 | 1.3485 | 0.7874 |
| 49    | 1.5112 | 1.5026 | 1.4586 | 1.4509 | 1.5054 | 1.5102 | 1.4074 | 0.7864 | 1.4737 | 1.3493 | 0.7893 |
| 49.25 | 1.5109 | 1.5034 | 1.4604 | 1.4493 | 1.5057 | 1.5101 | 1.4071 | 0.7937 | 1.4738 | 1.3491 | 0.7927 |
| 49.5  | 1.5094 | 1.504  | 1.4603 | 1.4496 | 1.5052 | 1.5102 | 1.4079 | 0.7997 | 1.4727 | 1.3494 | 0.795  |
| 49.75 | 1.5105 | 1.5038 | 1.4602 | 1.4499 | 1.5043 | 1.5094 | 1.4087 | 0.8045 | 1.473  | 1.3489 | 0.7982 |



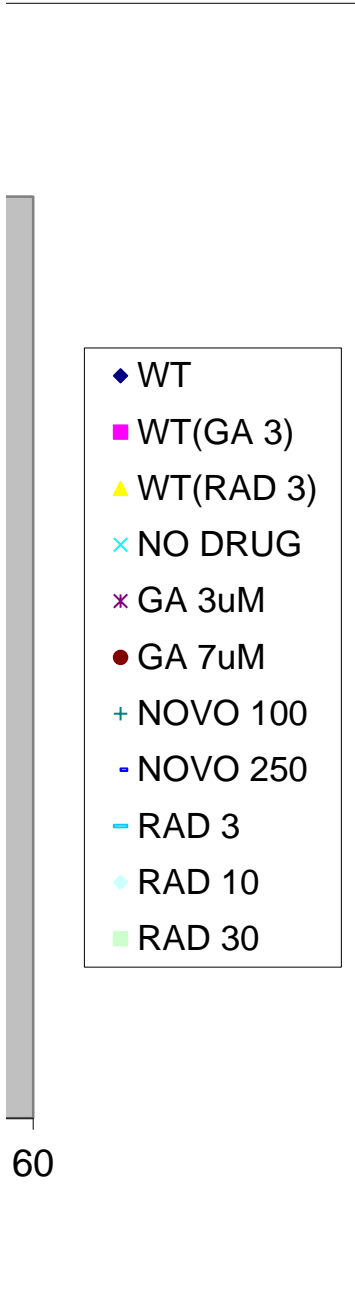

L17 L18 L19 L20 L21 L22 L23 L24

| TIME | WT     | WT(GA 3) | WT(RAD 3) | NO DRUG | GA 3uM | GA 7uM | NOVO 100 | NOVO 250 | RAD 3  | RAD 10 | RAD 30 |
|------|--------|----------|-----------|---------|--------|--------|----------|----------|--------|--------|--------|
| 0    | 0.1894 | 0.2051   | 0.1892    | 0.1538  | 0.1607 | 0.1726 | 0.2696   | 0.2425   | 0.1854 | 0.1514 | 0.1451 |
| 0.25 | 0.1844 | 0.1929   | 0.1812    | 0.1543  | 0.1603 | 0.1671 | 0.1903   | 0.2368   | 0.1625 | 0.1516 | 0.1441 |
| 0.5  | 0.1833 | 0.1912   | 0.1787    | 0.1538  | 0.159  | 0.1648 | 0.1934   | 0.2374   | 0.1551 | 0.1506 | 0.1435 |
| 0.75 | 0.1838 | 0.189    | 0.1758    | 0.1527  | 0.1571 | 0.1617 | 0.1942   | 0.2374   | 0.1516 | 0.1473 | 0.1422 |
| 1    | 0.1843 | 0.1877   | 0.1818    | 0.1515  | 0.1574 | 0.1607 | 0.1957   | 0.2374   | 0.1463 | 0.1452 | 0.1408 |
| 1.25 | 0.1867 | 0.1862   | 0.1836    | 0.1529  | 0.1579 | 0.1601 | 0.1956   | 0.2389   | 0.1452 | 0.1443 | 0.1402 |
| 1.5  | 0.188  | 0.186    | 0.1823    | 0.152   | 0.1569 | 0.1583 | 0.1982   | 0.2369   | 0.1436 | 0.1434 | 0.139  |

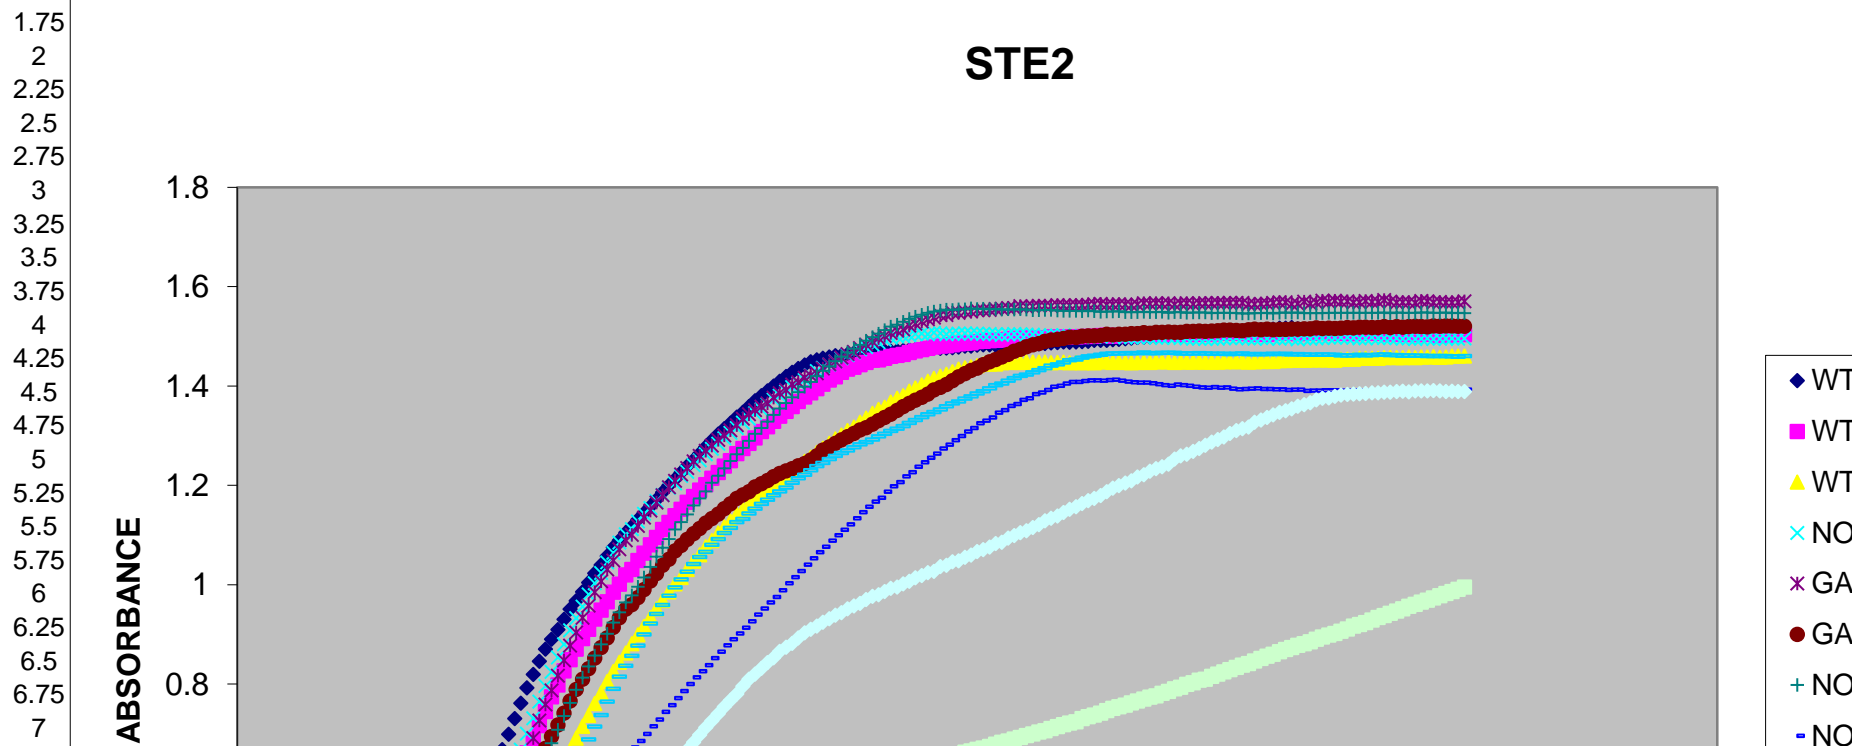

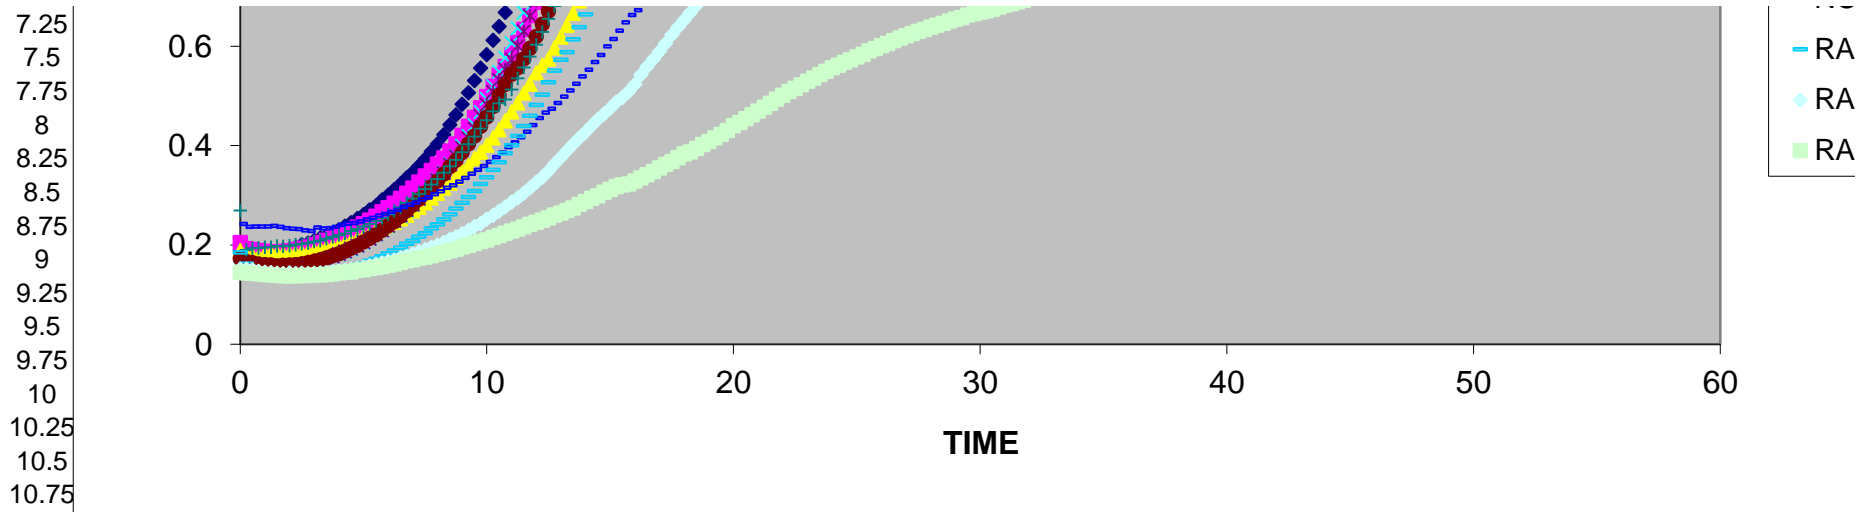

|       |        |        |        |        |        |        |        |        |        |        |        |
|-------|--------|--------|--------|--------|--------|--------|--------|--------|--------|--------|--------|
| 11    | 0.6992 | 0.5825 | 0.4678 | 0.6065 | 0.5733 | 0.5436 | 0.513  | 0.4066 | 0.4011 | 0.2864 | 0.228  |
| 11.25 | 0.7307 | 0.6075 | 0.4857 | 0.6357 | 0.6006 | 0.5566 | 0.5353 | 0.417  | 0.4193 | 0.2947 | 0.2323 |
| 11.5  | 0.7614 | 0.6339 | 0.5059 | 0.6682 | 0.6303 | 0.5745 | 0.5573 | 0.4278 | 0.4396 | 0.3046 | 0.2368 |
| 11.75 | 0.7927 | 0.6618 | 0.5242 | 0.7001 | 0.6608 | 0.5963 | 0.5795 | 0.4417 | 0.4602 | 0.3145 | 0.2415 |
| 12    | 0.8194 | 0.6889 | 0.5464 | 0.7314 | 0.6916 | 0.6199 | 0.6032 | 0.4558 | 0.482  | 0.3262 | 0.2454 |
| 12.25 | 0.8459 | 0.7168 | 0.5622 | 0.7645 | 0.7271 | 0.6443 | 0.6292 | 0.4666 | 0.5027 | 0.3363 | 0.2502 |
| 12.5  | 0.8706 | 0.7448 | 0.5743 | 0.7966 | 0.7588 | 0.6705 | 0.6556 | 0.4746 | 0.5278 | 0.3486 | 0.2548 |
| 12.75 | 0.8904 | 0.7744 | 0.5968 | 0.8247 | 0.7875 | 0.6948 | 0.6812 | 0.4859 | 0.551  | 0.3626 | 0.2602 |
| 13    | 0.9099 | 0.7982 | 0.6186 | 0.8537 | 0.8173 | 0.7178 | 0.708  | 0.4991 | 0.5732 | 0.3767 | 0.2643 |
| 13.25 | 0.9301 | 0.8269 | 0.6426 | 0.88   | 0.8478 | 0.7417 | 0.7359 | 0.5111 | 0.5883 | 0.3898 | 0.2695 |
| 13.5  | 0.9508 | 0.849  | 0.6665 | 0.9083 | 0.8775 | 0.7661 | 0.762  | 0.5248 | 0.6139 | 0.403  | 0.2748 |
| 13.75 | 0.9679 | 0.8707 | 0.6913 | 0.9329 | 0.904  | 0.7894 | 0.7887 | 0.5396 | 0.6383 | 0.4154 | 0.2815 |
| 14    | 0.986  | 0.8918 | 0.7152 | 0.9562 | 0.9333 | 0.8102 | 0.8132 | 0.5531 | 0.6641 | 0.4271 | 0.2877 |
| 14.25 | 1.0047 | 0.9106 | 0.7372 | 0.9803 | 0.9579 | 0.8313 | 0.8355 | 0.5682 | 0.6891 | 0.4405 | 0.2939 |
| 14.5  | 1.0233 | 0.9308 | 0.7608 | 1.003  | 0.9853 | 0.8523 | 0.8576 | 0.5824 | 0.7145 | 0.4522 | 0.2993 |
| 14.75 | 1.0397 | 0.9491 | 0.7825 | 1.024  | 1.0067 | 0.8738 | 0.8798 | 0.5997 | 0.738  | 0.464  | 0.306  |
| 15    | 1.0577 | 0.966  | 0.8057 | 1.0447 | 1.0309 | 0.8932 | 0.9013 | 0.6147 | 0.7647 | 0.475  | 0.3122 |
| 15.25 | 1.0753 | 0.9853 | 0.8251 | 1.0644 | 1.0491 | 0.9143 | 0.9237 | 0.6312 | 0.7908 | 0.4878 | 0.318  |
| 15.5  | 1.0897 | 1.0015 | 0.8439 | 1.085  | 1.0711 | 0.9334 | 0.9447 | 0.6483 | 0.8152 | 0.4968 | 0.3208 |
| 15.75 | 1.1049 | 1.0198 | 0.8628 | 1.1014 | 1.0892 | 0.9509 | 0.9645 | 0.663  | 0.8369 | 0.5089 | 0.3231 |
| 16    | 1.1171 | 1.031  | 0.8817 | 1.1123 | 1.1003 | 0.9598 | 0.9785 | 0.673  | 0.8572 | 0.5231 | 0.3285 |
| 16.25 | 1.1316 | 1.0487 | 0.8996 | 1.1272 | 1.1183 | 0.974  | 0.996  | 0.6853 | 0.8775 | 0.5423 | 0.335  |
| 16.5  | 1.1443 | 1.0637 | 0.9165 | 1.1427 | 1.1349 | 0.9905 | 1.0146 | 0.6996 | 0.9003 | 0.5588 | 0.3416 |
| 16.75 | 1.1579 | 1.0806 | 0.9342 | 1.1546 | 1.1491 | 1.0079 | 1.036  | 0.7152 | 0.922  | 0.5741 | 0.3484 |
| 17    | 1.1715 | 1.0952 | 0.9517 | 1.1684 | 1.1654 | 1.0224 | 1.0567 | 0.7288 | 0.9411 | 0.5894 | 0.3553 |
| 17.25 | 1.1858 | 1.1114 | 0.9682 | 1.1809 | 1.1804 | 1.0395 | 1.0747 | 0.7442 | 0.9592 | 0.606  | 0.3623 |
| 17.5  | 1.2004 | 1.1256 | 0.9855 | 1.1948 | 1.1965 | 1.0517 | 1.092  | 0.758  | 0.978  | 0.6234 | 0.3681 |

|       |        |        |        |        |        |        |        |        |        |        |        |
|-------|--------|--------|--------|--------|--------|--------|--------|--------|--------|--------|--------|
| 17.75 | 1.2123 | 1.1388 | 1.0016 | 1.2044 | 1.2092 | 1.0684 | 1.1112 | 0.7722 | 0.9946 | 0.6388 | 0.3758 |
| 18    | 1.2261 | 1.1522 | 1.015  | 1.2188 | 1.2221 | 1.079  | 1.1262 | 0.7862 | 1.011  | 0.6529 | 0.3832 |
| 18.25 | 1.239  | 1.1664 | 1.0307 | 1.2273 | 1.2351 | 1.0913 | 1.1417 | 0.8    | 1.0263 | 0.6675 | 0.3874 |
| 18.5  | 1.251  | 1.1779 | 1.0478 | 1.2408 | 1.2484 | 1.1031 | 1.1598 | 0.8136 | 1.0421 | 0.6829 | 0.3947 |
| 18.75 | 1.2641 | 1.1907 | 1.0607 | 1.2505 | 1.2592 | 1.1132 | 1.174  | 0.8257 | 1.0557 | 0.6977 | 0.402  |
| 19    | 1.2773 | 1.2018 | 1.0765 | 1.2624 | 1.2699 | 1.124  | 1.1881 | 0.8383 | 1.0665 | 0.7125 | 0.4087 |
| 19.25 | 1.2907 | 1.2145 | 1.0891 | 1.2735 | 1.2799 | 1.133  | 1.2055 | 0.8526 | 1.0802 | 0.7263 | 0.4155 |
| 19.5  | 1.3032 | 1.2259 | 1.1041 | 1.2837 | 1.2917 | 1.1422 | 1.2197 | 0.8656 | 1.0921 | 0.7405 | 0.4227 |
| 19.75 | 1.3141 | 1.239  | 1.1166 | 1.2949 | 1.3006 | 1.1532 | 1.2341 | 0.8781 | 1.1044 | 0.7545 | 0.4308 |
| 20    | 1.3251 | 1.2497 | 1.1283 | 1.3056 | 1.3111 | 1.1626 | 1.2494 | 0.8906 | 1.1144 | 0.7671 | 0.4399 |
| 20.25 | 1.3374 | 1.2637 | 1.1419 | 1.3157 | 1.3212 | 1.1739 | 1.2626 | 0.9019 | 1.1263 | 0.7805 | 0.4467 |
| 20.5  | 1.3474 | 1.2743 | 1.1521 | 1.3263 | 1.3343 | 1.1808 | 1.2755 | 0.9133 | 1.1328 | 0.7957 | 0.4543 |
| 20.75 | 1.3589 | 1.2848 | 1.1637 | 1.3343 | 1.3429 | 1.1871 | 1.2896 | 0.9262 | 1.1434 | 0.81   | 0.4624 |
| 21    | 1.3704 | 1.2956 | 1.1744 | 1.3449 | 1.3517 | 1.1968 | 1.3037 | 0.9402 | 1.153  | 0.8199 | 0.4699 |
| 21.25 | 1.3806 | 1.3083 | 1.1829 | 1.353  | 1.3587 | 1.2035 | 1.3153 | 0.9522 | 1.1626 | 0.8319 | 0.4776 |
| 21.5  | 1.39   | 1.3184 | 1.1906 | 1.3629 | 1.365  | 1.2096 | 1.3285 | 0.9646 | 1.1714 | 0.8431 | 0.4852 |
| 21.75 | 1.3999 | 1.3289 | 1.2037 | 1.3731 | 1.3766 | 1.2173 | 1.3418 | 0.9757 | 1.18   | 0.8529 | 0.4936 |
| 22    | 1.4093 | 1.3395 | 1.2116 | 1.3805 | 1.3856 | 1.2243 | 1.3545 | 0.989  | 1.1879 | 0.8658 | 0.5014 |
| 22.25 | 1.4189 | 1.3493 | 1.2223 | 1.3892 | 1.3924 | 1.2295 | 1.3655 | 1.0031 | 1.196  | 0.8743 | 0.5089 |
| 22.5  | 1.4278 | 1.3589 | 1.2316 | 1.3979 | 1.403  | 1.2336 | 1.3772 | 1.0151 | 1.2055 | 0.8818 | 0.5157 |
| 22.75 | 1.4356 | 1.369  | 1.2391 | 1.4054 | 1.4075 | 1.2394 | 1.3878 | 1.0274 | 1.2142 | 0.8933 | 0.5229 |
| 23    | 1.4425 | 1.3781 | 1.2485 | 1.4123 | 1.4164 | 1.2442 | 1.3987 | 1.0402 | 1.2216 | 0.903  | 0.5296 |
| 23.25 | 1.4488 | 1.3861 | 1.257  | 1.4217 | 1.4211 | 1.251  | 1.4082 | 1.0533 | 1.2302 | 0.9101 | 0.5361 |
| 23.5  | 1.4527 | 1.3947 | 1.2667 | 1.43   | 1.4254 | 1.2598 | 1.4197 | 1.0653 | 1.2389 | 0.9168 | 0.5433 |
| 23.75 | 1.4559 | 1.4037 | 1.2752 | 1.4364 | 1.4356 | 1.2709 | 1.4307 | 1.0764 | 1.2452 | 0.9243 | 0.55   |
| 24    | 1.4583 | 1.4119 | 1.2845 | 1.4432 | 1.4436 | 1.2772 | 1.4399 | 1.089  | 1.253  | 0.9319 | 0.557  |
| 24.25 | 1.4609 | 1.4188 | 1.2937 | 1.4495 | 1.4493 | 1.2847 | 1.4502 | 1.0996 | 1.2598 | 0.9389 | 0.562  |
| 24.5  | 1.4615 | 1.4276 | 1.3014 | 1.4558 | 1.4571 | 1.2914 | 1.459  | 1.1106 | 1.2655 | 0.9441 | 0.568  |
| 24.75 | 1.4635 | 1.4341 | 1.3101 | 1.4625 | 1.4641 | 1.2982 | 1.4674 | 1.1219 | 1.2704 | 0.9515 | 0.5731 |
| 25    | 1.466  | 1.4379 | 1.3177 | 1.4677 | 1.469  | 1.3043 | 1.475  | 1.1337 | 1.2768 | 0.9575 | 0.5788 |
| 25.25 | 1.4669 | 1.4431 | 1.3269 | 1.474  | 1.4767 | 1.3116 | 1.4828 | 1.1463 | 1.2829 | 0.9627 | 0.5836 |
| 25.5  | 1.4687 | 1.4476 | 1.3358 | 1.4783 | 1.4837 | 1.3163 | 1.4915 | 1.1572 | 1.2873 | 0.9703 | 0.5908 |
| 25.75 | 1.4687 | 1.4518 | 1.345  | 1.4835 | 1.4896 | 1.3234 | 1.4984 | 1.1673 | 1.2926 | 0.9766 | 0.5957 |
| 26    | 1.4682 | 1.453  | 1.3526 | 1.4881 | 1.4966 | 1.3302 | 1.5058 | 1.1754 | 1.2987 | 0.9798 | 0.6014 |
| 26.25 | 1.4704 | 1.4557 | 1.3577 | 1.4936 | 1.5008 | 1.3369 | 1.5126 | 1.1876 | 1.3037 | 0.9867 | 0.6059 |
| 26.5  | 1.4702 | 1.4595 | 1.368  | 1.4971 | 1.5069 | 1.343  | 1.5196 | 1.1982 | 1.3097 | 0.9926 | 0.6118 |
| 26.75 | 1.4706 | 1.4619 | 1.3756 | 1.4997 | 1.5113 | 1.3511 | 1.5237 | 1.2067 | 1.314  | 0.9954 | 0.6165 |
| 27    | 1.4716 | 1.4639 | 1.3808 | 1.5003 | 1.5137 | 1.3585 | 1.5294 | 1.2183 | 1.3197 | 1.0019 | 0.6213 |
| 27.25 | 1.4725 | 1.4677 | 1.3894 | 1.5025 | 1.5214 | 1.3652 | 1.5353 | 1.2269 | 1.3257 | 1.0069 | 0.6258 |
| 27.5  | 1.473  | 1.4709 | 1.396  | 1.5047 | 1.5253 | 1.3714 | 1.5399 | 1.2378 | 1.3313 | 1.0143 | 0.6305 |
| 27.75 | 1.4747 | 1.4735 | 1.4025 | 1.5053 | 1.5299 | 1.3771 | 1.5438 | 1.2467 | 1.3372 | 1.0186 | 0.6342 |
| 28    | 1.4747 | 1.4758 | 1.4095 | 1.504  | 1.5343 | 1.3839 | 1.5473 | 1.2556 | 1.3431 | 1.0242 | 0.6385 |

|       |        |        |        |        |        |        |        |        |        |        |        |
|-------|--------|--------|--------|--------|--------|--------|--------|--------|--------|--------|--------|
| 28.25 | 1.4772 | 1.4784 | 1.4156 | 1.5073 | 1.538  | 1.3919 | 1.55   | 1.2642 | 1.3476 | 1.0272 | 0.6422 |
| 28.5  | 1.4758 | 1.4806 | 1.4201 | 1.5063 | 1.5426 | 1.3974 | 1.5522 | 1.2746 | 1.3528 | 1.0365 | 0.6463 |
| 28.75 | 1.4763 | 1.4813 | 1.4239 | 1.5045 | 1.5432 | 1.4034 | 1.5536 | 1.2823 | 1.3591 | 1.0394 | 0.6508 |
| 29    | 1.4771 | 1.4829 | 1.4289 | 1.5051 | 1.5482 | 1.411  | 1.5533 | 1.2911 | 1.365  | 1.0462 | 0.6545 |
| 29.25 | 1.4786 | 1.485  | 1.4341 | 1.5057 | 1.5472 | 1.4184 | 1.5546 | 1.2997 | 1.3687 | 1.0485 | 0.6578 |
| 29.5  | 1.4803 | 1.4861 | 1.4367 | 1.5063 | 1.5502 | 1.4247 | 1.5546 | 1.3082 | 1.3748 | 1.0554 | 0.6632 |
| 29.75 | 1.4807 | 1.4866 | 1.4387 | 1.5056 | 1.5497 | 1.4313 | 1.5564 | 1.3157 | 1.3794 | 1.0595 | 0.6656 |
| 30    | 1.4823 | 1.4892 | 1.4412 | 1.5056 | 1.5525 | 1.4358 | 1.5553 | 1.3249 | 1.3851 | 1.0668 | 0.6689 |
| 30.25 | 1.4831 | 1.49   | 1.4444 | 1.5049 | 1.5527 | 1.4428 | 1.5555 | 1.3304 | 1.3898 | 1.071  | 0.6716 |
| 30.5  | 1.4829 | 1.4913 | 1.4444 | 1.5047 | 1.5531 | 1.4491 | 1.5546 | 1.3368 | 1.3953 | 1.0759 | 0.6746 |
| 30.75 | 1.4823 | 1.4923 | 1.4446 | 1.5041 | 1.5549 | 1.4533 | 1.5549 | 1.3463 | 1.402  | 1.0827 | 0.6791 |
| 31    | 1.4825 | 1.4929 | 1.4466 | 1.5029 | 1.5556 | 1.4584 | 1.5538 | 1.3516 | 1.405  | 1.0858 | 0.6828 |
| 31.25 | 1.4843 | 1.4939 | 1.448  | 1.504  | 1.5572 | 1.4636 | 1.5546 | 1.3599 | 1.4108 | 1.0937 | 0.6858 |
| 31.5  | 1.4842 | 1.496  | 1.4475 | 1.5049 | 1.5571 | 1.4698 | 1.5541 | 1.3638 | 1.4157 | 1.0989 | 0.6895 |
| 31.75 | 1.4837 | 1.4956 | 1.4475 | 1.5043 | 1.5607 | 1.4737 | 1.5543 | 1.372  | 1.4203 | 1.1049 | 0.6926 |
| 32    | 1.4837 | 1.4964 | 1.4488 | 1.5039 | 1.5598 | 1.4791 | 1.5539 | 1.3757 | 1.4232 | 1.1085 | 0.6966 |
| 32.25 | 1.4847 | 1.4969 | 1.4483 | 1.5039 | 1.5601 | 1.4829 | 1.5526 | 1.3841 | 1.4278 | 1.115  | 0.6995 |
| 32.5  | 1.4848 | 1.4964 | 1.448  | 1.5016 | 1.5618 | 1.4857 | 1.5523 | 1.3872 | 1.4323 | 1.1208 | 0.7034 |
| 32.75 | 1.4858 | 1.4974 | 1.448  | 1.5017 | 1.5617 | 1.4902 | 1.5529 | 1.3922 | 1.4361 | 1.1288 | 0.7064 |
| 33    | 1.4867 | 1.4992 | 1.4467 | 1.5023 | 1.5607 | 1.4926 | 1.5529 | 1.3986 | 1.4413 | 1.1337 | 0.7106 |
| 33.25 | 1.4876 | 1.498  | 1.4476 | 1.5013 | 1.5626 | 1.4937 | 1.5522 | 1.4006 | 1.4439 | 1.1384 | 0.7145 |
| 33.5  | 1.4885 | 1.4993 | 1.4481 | 1.5025 | 1.5619 | 1.4957 | 1.5513 | 1.4049 | 1.4477 | 1.1456 | 0.7187 |
| 33.75 | 1.4883 | 1.4994 | 1.4469 | 1.5006 | 1.5619 | 1.4982 | 1.5512 | 1.4085 | 1.452  | 1.152  | 0.7216 |
| 34    | 1.4888 | 1.4988 | 1.4474 | 1.501  | 1.5626 | 1.4976 | 1.5512 | 1.4081 | 1.4533 | 1.1573 | 0.7245 |
| 34.25 | 1.4892 | 1.4995 | 1.4471 | 1.5    | 1.563  | 1.5006 | 1.5506 | 1.4101 | 1.4569 | 1.1635 | 0.7304 |
| 34.5  | 1.4899 | 1.4996 | 1.4474 | 1.4993 | 1.5637 | 1.5009 | 1.5516 | 1.4116 | 1.4596 | 1.1693 | 0.7346 |
| 34.75 | 1.4919 | 1.5003 | 1.4472 | 1.4989 | 1.5646 | 1.5012 | 1.5506 | 1.4117 | 1.461  | 1.1741 | 0.7375 |
| 35    | 1.492  | 1.5014 | 1.4486 | 1.4997 | 1.5652 | 1.5017 | 1.5494 | 1.4107 | 1.4633 | 1.1799 | 0.7418 |
| 35.25 | 1.4922 | 1.502  | 1.4486 | 1.4997 | 1.5634 | 1.5041 | 1.5498 | 1.4119 | 1.4648 | 1.1875 | 0.7471 |
| 35.5  | 1.4933 | 1.5004 | 1.4477 | 1.4996 | 1.5644 | 1.503  | 1.5497 | 1.4128 | 1.4658 | 1.1943 | 0.7513 |
| 35.75 | 1.4939 | 1.5019 | 1.4479 | 1.4995 | 1.5645 | 1.5041 | 1.5505 | 1.4107 | 1.4656 | 1.1995 | 0.7548 |
| 36    | 1.4951 | 1.5018 | 1.4476 | 1.4976 | 1.5641 | 1.5044 | 1.5489 | 1.4089 | 1.4664 | 1.205  | 0.7577 |
| 36.25 | 1.4965 | 1.5015 | 1.4469 | 1.4978 | 1.563  | 1.5057 | 1.5489 | 1.4078 | 1.466  | 1.2092 | 0.7624 |
| 36.5  | 1.4976 | 1.5021 | 1.4473 | 1.4975 | 1.5642 | 1.5056 | 1.5487 | 1.4068 | 1.4665 | 1.217  | 0.7659 |
| 36.75 | 1.4983 | 1.5037 | 1.4481 | 1.4977 | 1.5665 | 1.5074 | 1.5494 | 1.4071 | 1.4673 | 1.2217 | 0.7701 |
| 37    | 1.4992 | 1.5034 | 1.4477 | 1.4981 | 1.5657 | 1.5064 | 1.549  | 1.4056 | 1.4664 | 1.2287 | 0.7739 |
| 37.25 | 1.4997 | 1.504  | 1.449  | 1.4972 | 1.5668 | 1.508  | 1.5484 | 1.4038 | 1.4663 | 1.2337 | 0.7763 |
| 37.5  | 1.5011 | 1.5037 | 1.4489 | 1.4964 | 1.5653 | 1.5082 | 1.5494 | 1.4016 | 1.467  | 1.2377 | 0.7816 |
| 37.75 | 1.502  | 1.505  | 1.4486 | 1.4983 | 1.5666 | 1.5086 | 1.5477 | 1.4008 | 1.4666 | 1.243  | 0.7855 |
| 38    | 1.5029 | 1.5047 | 1.4475 | 1.4969 | 1.5641 | 1.5082 | 1.5486 | 1.4029 | 1.4672 | 1.2533 | 0.7903 |
| 38.25 | 1.5029 | 1.5046 | 1.449  | 1.4966 | 1.5659 | 1.5082 | 1.5484 | 1.4021 | 1.4654 | 1.2595 | 0.7941 |
| 38.5  | 1.504  | 1.505  | 1.4481 | 1.4956 | 1.5664 | 1.5099 | 1.5476 | 1.4004 | 1.4658 | 1.2624 | 0.7995 |



|       |        |        |        |        |        |        |        |        |        |        |        |
|-------|--------|--------|--------|--------|--------|--------|--------|--------|--------|--------|--------|
| 38.75 | 1.5035 | 1.5042 | 1.448  | 1.4954 | 1.5647 | 1.5098 | 1.5479 | 1.3989 | 1.4657 | 1.2687 | 0.8029 |
| 39    | 1.5042 | 1.505  | 1.4488 | 1.495  | 1.5667 | 1.5107 | 1.5478 | 1.3976 | 1.4661 | 1.2745 | 0.8077 |
| 39.25 | 1.5058 | 1.5049 | 1.4482 | 1.4944 | 1.5665 | 1.5101 | 1.5478 | 1.3967 | 1.4654 | 1.2807 | 0.8102 |
| 39.5  | 1.507  | 1.5052 | 1.4485 | 1.4953 | 1.567  | 1.5108 | 1.5469 | 1.3977 | 1.4649 | 1.2869 | 0.8159 |
| 39.75 | 1.5073 | 1.506  | 1.4484 | 1.4954 | 1.5675 | 1.5116 | 1.5475 | 1.3969 | 1.465  | 1.2921 | 0.82   |
| 40    | 1.5077 | 1.5062 | 1.4489 | 1.4961 | 1.567  | 1.5127 | 1.5474 | 1.397  | 1.4647 | 1.2974 | 0.8245 |
| 40.25 | 1.5093 | 1.5063 | 1.4496 | 1.4963 | 1.5676 | 1.5124 | 1.5472 | 1.3948 | 1.4644 | 1.3044 | 0.8293 |
| 40.5  | 1.5096 | 1.506  | 1.4489 | 1.4962 | 1.5675 | 1.5121 | 1.5466 | 1.3933 | 1.465  | 1.3101 | 0.8339 |
| 40.75 | 1.5108 | 1.5059 | 1.4494 | 1.4967 | 1.5672 | 1.5114 | 1.546  | 1.394  | 1.4653 | 1.3144 | 0.8385 |
| 41    | 1.5129 | 1.5053 | 1.4485 | 1.4956 | 1.5651 | 1.5131 | 1.5462 | 1.3945 | 1.4645 | 1.3177 | 0.8412 |
| 41.25 | 1.5127 | 1.5048 | 1.4491 | 1.4954 | 1.5651 | 1.5145 | 1.5469 | 1.3953 | 1.4643 | 1.3272 | 0.8469 |
| 41.5  | 1.513  | 1.5052 | 1.4495 | 1.4966 | 1.5652 | 1.5134 | 1.5468 | 1.3938 | 1.4641 | 1.3318 | 0.8518 |
| 41.75 | 1.513  | 1.5045 | 1.4496 | 1.4951 | 1.5659 | 1.5145 | 1.5472 | 1.3938 | 1.4643 | 1.3366 | 0.8564 |
| 42    | 1.5143 | 1.506  | 1.4492 | 1.4969 | 1.5672 | 1.513  | 1.5459 | 1.3932 | 1.4651 | 1.3422 | 0.8601 |
| 42.25 | 1.5164 | 1.506  | 1.4512 | 1.4949 | 1.5685 | 1.5139 | 1.5475 | 1.3935 | 1.4643 | 1.3473 | 0.8655 |
| 42.5  | 1.5166 | 1.5062 | 1.4516 | 1.4959 | 1.5688 | 1.514  | 1.5483 | 1.3924 | 1.465  | 1.3503 | 0.8695 |
| 42.75 | 1.518  | 1.506  | 1.4518 | 1.4968 | 1.5647 | 1.5147 | 1.5472 | 1.3927 | 1.4637 | 1.3544 | 0.8737 |
| 43    | 1.5154 | 1.5053 | 1.4522 | 1.4941 | 1.5654 | 1.5146 | 1.5481 | 1.3925 | 1.4642 | 1.3593 | 0.878  |
| 43.25 | 1.5129 | 1.5059 | 1.4522 | 1.4957 | 1.5701 | 1.515  | 1.5467 | 1.3904 | 1.4636 | 1.3626 | 0.8812 |
| 43.5  | 1.5111 | 1.5064 | 1.4527 | 1.4952 | 1.5661 | 1.5153 | 1.5468 | 1.3906 | 1.4633 | 1.3667 | 0.8851 |
| 43.75 | 1.5114 | 1.5084 | 1.453  | 1.4959 | 1.5678 | 1.5169 | 1.5465 | 1.3911 | 1.4632 | 1.3719 | 0.8903 |
| 44    | 1.5125 | 1.5078 | 1.4529 | 1.4964 | 1.5717 | 1.5159 | 1.5468 | 1.3914 | 1.4635 | 1.3756 | 0.8948 |
| 44.25 | 1.5102 | 1.5073 | 1.4529 | 1.4975 | 1.569  | 1.5162 | 1.5477 | 1.3916 | 1.4629 | 1.3763 | 0.8991 |
| 44.5  | 1.5105 | 1.5065 | 1.4523 | 1.4972 | 1.5721 | 1.516  | 1.5473 | 1.3915 | 1.4631 | 1.3796 | 0.9022 |
| 44.75 | 1.5104 | 1.5065 | 1.454  | 1.4975 | 1.5699 | 1.5163 | 1.5473 | 1.3906 | 1.4617 | 1.3816 | 0.9062 |
| 45    | 1.5092 | 1.5064 | 1.4543 | 1.4976 | 1.5706 | 1.5179 | 1.5477 | 1.391  | 1.4616 | 1.3834 | 0.911  |
| 45.25 | 1.5105 | 1.5057 | 1.4541 | 1.4969 | 1.568  | 1.5168 | 1.5472 | 1.3913 | 1.4616 | 1.3838 | 0.9166 |
| 45.5  | 1.5103 | 1.5065 | 1.4557 | 1.4961 | 1.5684 | 1.5181 | 1.5476 | 1.3913 | 1.4629 | 1.3843 | 0.9203 |
| 45.75 | 1.51   | 1.5067 | 1.4559 | 1.4956 | 1.571  | 1.5187 | 1.5474 | 1.3915 | 1.4619 | 1.3853 | 0.9236 |
| 46    | 1.5108 | 1.5061 | 1.4561 | 1.4976 | 1.5693 | 1.5179 | 1.5477 | 1.3912 | 1.4626 | 1.3864 | 0.9288 |
| 46.25 | 1.5109 | 1.5064 | 1.456  | 1.4963 | 1.5696 | 1.5178 | 1.5471 | 1.3915 | 1.4629 | 1.3861 | 0.934  |
| 46.5  | 1.511  | 1.5069 | 1.4571 | 1.4962 | 1.5732 | 1.5194 | 1.5478 | 1.3923 | 1.4639 | 1.3875 | 0.9383 |
| 46.75 | 1.511  | 1.5052 | 1.4577 | 1.4964 | 1.57   | 1.518  | 1.5469 | 1.3921 | 1.4622 | 1.3879 | 0.9429 |
| 47    | 1.5111 | 1.5059 | 1.4574 | 1.4964 | 1.5679 | 1.5197 | 1.5482 | 1.3926 | 1.4623 | 1.3891 | 0.9471 |
| 47.25 | 1.5102 | 1.5042 | 1.4571 | 1.4954 | 1.5687 | 1.5187 | 1.5472 | 1.3915 | 1.461  | 1.3897 | 0.9514 |
| 47.5  | 1.5112 | 1.5044 | 1.4583 | 1.4961 | 1.5685 | 1.5197 | 1.5474 | 1.3914 | 1.4617 | 1.3886 | 0.9565 |
| 47.75 | 1.5109 | 1.5036 | 1.4575 | 1.4947 | 1.5676 | 1.5203 | 1.5475 | 1.3921 | 1.4609 | 1.3902 | 0.9604 |
| 48    | 1.511  | 1.5046 | 1.4582 | 1.4953 | 1.571  | 1.5197 | 1.5479 | 1.3924 | 1.461  | 1.3901 | 0.9653 |
| 48.25 | 1.511  | 1.5042 | 1.4587 | 1.496  | 1.5709 | 1.5192 | 1.5478 | 1.3925 | 1.4607 | 1.3904 | 0.969  |
| 48.5  | 1.5111 | 1.504  | 1.4592 | 1.4948 | 1.5677 | 1.5208 | 1.5474 | 1.3918 | 1.4605 | 1.3907 | 0.9732 |
| 48.75 | 1.5107 | 1.5019 | 1.4578 | 1.4952 | 1.5692 | 1.5202 | 1.5473 | 1.392  | 1.4603 | 1.3904 | 0.9779 |
| 49    | 1.5112 | 1.5026 | 1.4586 | 1.4955 | 1.5681 | 1.521  | 1.5481 | 1.3926 | 1.4604 | 1.3892 | 0.9824 |

|       |        |        |        |        |        |        |        |        |        |        |        |
|-------|--------|--------|--------|--------|--------|--------|--------|--------|--------|--------|--------|
| 49.25 | 1.5109 | 1.5034 | 1.4604 | 1.4957 | 1.5682 | 1.5209 | 1.5466 | 1.3919 | 1.4599 | 1.3899 | 0.9865 |
| 49.5  | 1.5094 | 1.504  | 1.4603 | 1.4954 | 1.5686 | 1.5202 | 1.5472 | 1.3926 | 1.459  | 1.389  | 0.9909 |
| 49.75 | 1.5105 | 1.5038 | 1.4602 | 1.4956 | 1.5705 | 1.5206 | 1.5465 | 1.3926 | 1.4605 | 1.389  | 0.9956 |

┌  
└(GA 3)  
└(RAD 3)  
) DRUG  
└ 3uM  
└ 7uM  
)VO 100  
)VO 250

.D 3

.D 10

.D 30

STI1

**B1 B2 B3 B4 B5 B6 B7 B8**

| <b>TIME</b> | <b>WT</b> | <b>WT(GA 3)</b> | <b>WT(RAD 3)</b> | <b>NO DRUG</b> | <b>GA 3uM</b> | <b>GA 7uM</b> | <b>NOVO 10</b> | <b>NOVO 250</b> | <b>RAD 3</b> | <b>RAD 10</b> | <b>RAD 30</b> |
|-------------|-----------|-----------------|------------------|----------------|---------------|---------------|----------------|-----------------|--------------|---------------|---------------|
| 0           | 0.1894    | 0.2051          | 0.1892           | 0.1518         | 0.1507        | 0.1466        | 0.1808         | 0.2413          | 0.1519       | 0.1305        | 0.1579        |
| 0.25        | 0.1844    | 0.1929          | 0.1812           | 0.1484         | 0.1452        | 0.1402        | 0.1814         | 0.2413          | 0.1406       | 0.1212        | 0.1496        |
| 0.5         | 0.1833    | 0.1912          | 0.1787           | 0.1461         | 0.1431        | 0.1376        | 0.1817         | 0.2446          | 0.1369       | 0.1203        | 0.1482        |
| 0.75        | 0.1838    | 0.189           | 0.1758           | 0.1435         | 0.1418        | 0.137         | 0.1783         | 0.2432          | 0.1349       | 0.1189        | 0.146         |
| 1           | 0.1843    | 0.1877          | 0.1818           | 0.1416         | 0.1404        | 0.1354        | 0.1771         | 0.2444          | 0.1335       | 0.1181        | 0.1453        |
| 1.25        | 0.1867    | 0.1862          | 0.1836           | 0.1418         | 0.1406        | 0.1356        | 0.1764         | 0.2446          | 0.1343       | 0.1178        | 0.1452        |
| 1.5         | 0.188     | 0.186           | 0.1823           | 0.1418         | 0.1404        | 0.1357        | 0.1756         | 0.2443          | 0.1339       | 0.1167        | 0.1454        |
| 1.75        | 0.1899    | 0.1879          | 0.1839           | 0.1428         | 0.1407        | 0.1367        | 0.1747         | 0.2444          | 0.1339       | 0.1174        | 0.1464        |

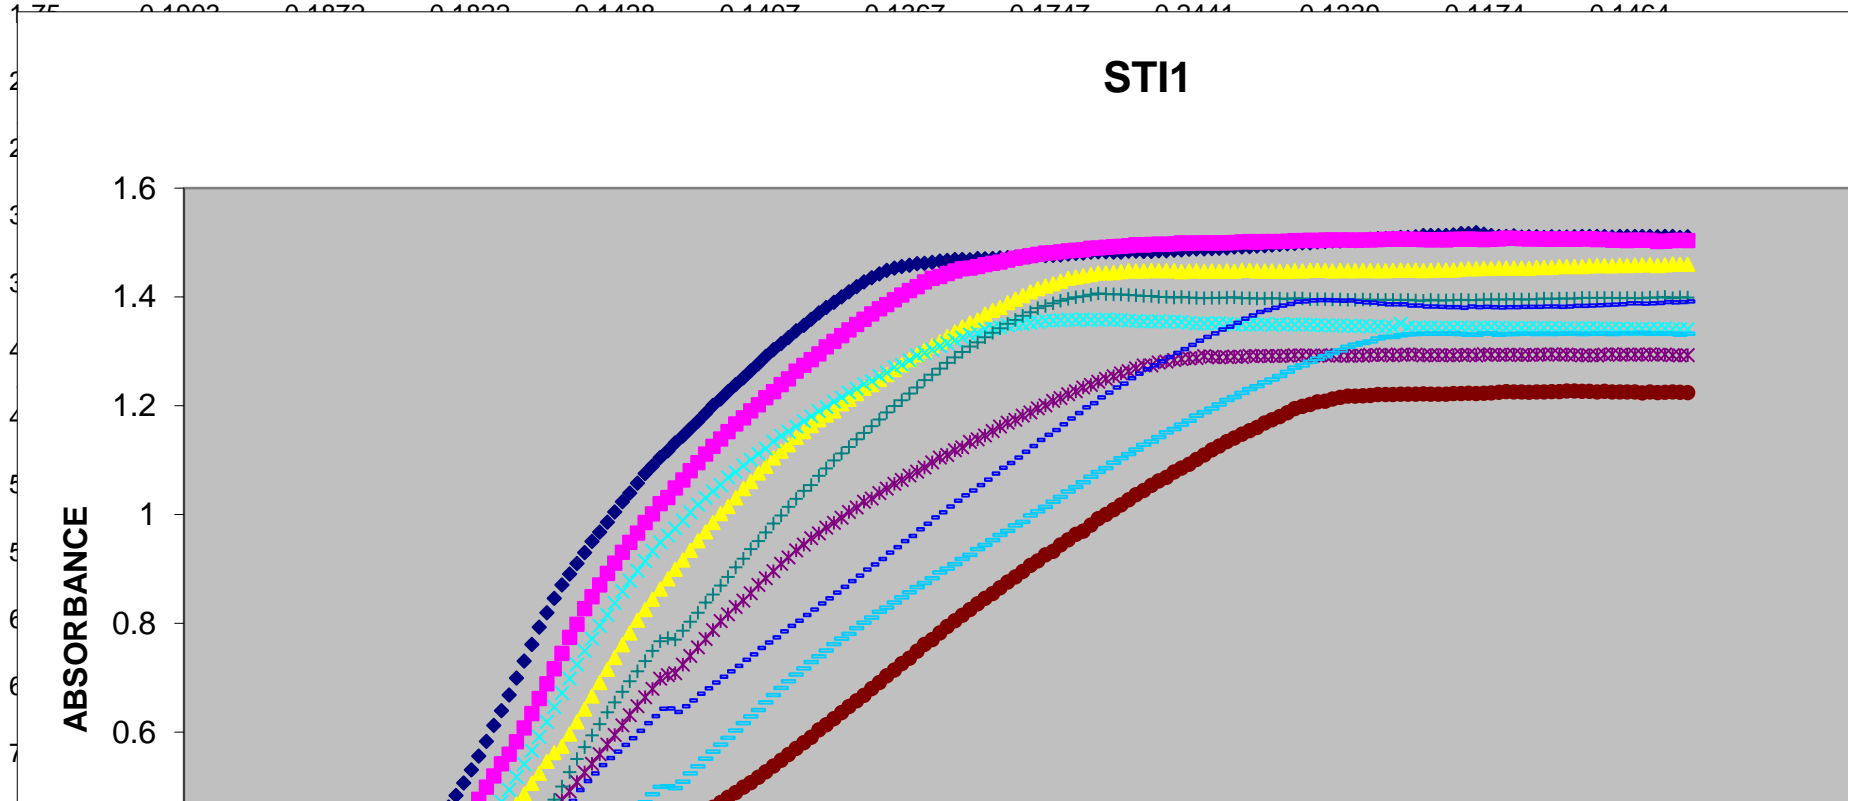

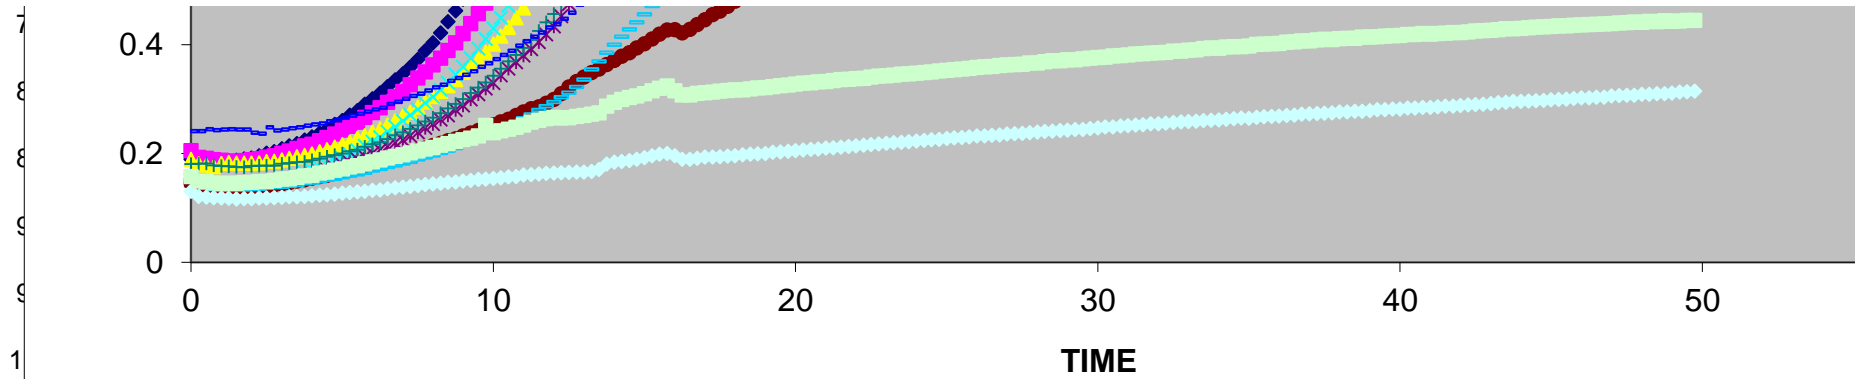

|       |        |        |        |        |        |        |        |        |        |        |        |
|-------|--------|--------|--------|--------|--------|--------|--------|--------|--------|--------|--------|
| 11    | 0.6992 | 0.5825 | 0.4678 | 0.5178 | 0.3798 | 0.2767 | 0.3942 | 0.4065 | 0.2647 | 0.1607 | 0.2527 |
| 11.25 | 0.7307 | 0.6075 | 0.4857 | 0.5412 | 0.392  | 0.2825 | 0.409  | 0.4149 | 0.2721 | 0.1611 | 0.2576 |
| 11.5  | 0.7614 | 0.6339 | 0.5059 | 0.5661 | 0.405  | 0.2861 | 0.4256 | 0.4226 | 0.2802 | 0.1624 | 0.261  |
| 11.75 | 0.7927 | 0.6618 | 0.5242 | 0.5915 | 0.419  | 0.2923 | 0.4414 | 0.4318 | 0.2872 | 0.1637 | 0.2642 |
| 12    | 0.8194 | 0.6889 | 0.5464 | 0.6186 | 0.4334 | 0.2994 | 0.4563 | 0.4377 | 0.2949 | 0.1641 | 0.2667 |
| 12.25 | 0.8459 | 0.7168 | 0.5622 | 0.6457 | 0.4525 | 0.3099 | 0.4758 | 0.4477 | 0.3036 | 0.1645 | 0.2651 |
| 12.5  | 0.8706 | 0.7448 | 0.5743 | 0.6719 | 0.4747 | 0.3226 | 0.5003 | 0.4588 | 0.3121 | 0.1651 | 0.2661 |
| 12.75 | 0.8904 | 0.7744 | 0.5968 | 0.6982 | 0.4914 | 0.3325 | 0.5264 | 0.4738 | 0.3226 | 0.166  | 0.2681 |
| 13    | 0.9099 | 0.7982 | 0.6186 | 0.7244 | 0.5083 | 0.3405 | 0.5509 | 0.4938 | 0.3357 | 0.166  | 0.2698 |
| 13.25 | 0.9301 | 0.8269 | 0.6426 | 0.7494 | 0.5257 | 0.3486 | 0.5727 | 0.51   | 0.3547 | 0.1671 | 0.2722 |
| 13.5  | 0.9508 | 0.849  | 0.6665 | 0.772  | 0.5418 | 0.3556 | 0.5939 | 0.5244 | 0.3697 | 0.1705 | 0.2746 |
| 13.75 | 0.9679 | 0.8707 | 0.6913 | 0.7953 | 0.5593 | 0.3637 | 0.6147 | 0.5393 | 0.3855 | 0.1804 | 0.2872 |
| 14    | 0.986  | 0.8918 | 0.7152 | 0.8156 | 0.5772 | 0.3715 | 0.6367 | 0.5523 | 0.4001 | 0.1841 | 0.2944 |
| 14.25 | 1.0047 | 0.9106 | 0.7372 | 0.8372 | 0.5948 | 0.3787 | 0.6547 | 0.5643 | 0.4145 | 0.1854 | 0.2993 |
| 14.5  | 1.0233 | 0.9308 | 0.7608 | 0.8587 | 0.6124 | 0.3855 | 0.6744 | 0.5766 | 0.4285 | 0.1873 | 0.3028 |
| 14.75 | 1.0397 | 0.9491 | 0.7825 | 0.8783 | 0.6313 | 0.3942 | 0.6937 | 0.5888 | 0.4415 | 0.1892 | 0.3061 |
| 15    | 1.0577 | 0.966  | 0.8057 | 0.8967 | 0.6477 | 0.4019 | 0.7117 | 0.6025 | 0.456  | 0.1922 | 0.31   |
| 15.25 | 1.0753 | 0.9853 | 0.8251 | 0.914  | 0.6644 | 0.4105 | 0.7309 | 0.6165 | 0.4713 | 0.1959 | 0.3156 |
| 15.5  | 1.0897 | 1.0015 | 0.8439 | 0.9331 | 0.6795 | 0.4192 | 0.7493 | 0.6295 | 0.4859 | 0.1986 | 0.32   |
| 15.75 | 1.1049 | 1.0198 | 0.8628 | 0.9486 | 0.6982 | 0.4272 | 0.7669 | 0.643  | 0.4992 | 0.2003 | 0.3243 |
| 16    | 1.1171 | 1.031  | 0.8817 | 0.962  | 0.7048 | 0.4275 | 0.7732 | 0.6436 | 0.5004 | 0.1962 | 0.3152 |
| 16.25 | 1.1316 | 1.0487 | 0.8996 | 0.9739 | 0.7081 | 0.4221 | 0.77   | 0.6369 | 0.497  | 0.1895 | 0.3079 |
| 16.5  | 1.1443 | 1.0637 | 0.9165 | 0.989  | 0.724  | 0.4283 | 0.7863 | 0.6476 | 0.5087 | 0.1897 | 0.3075 |
| 16.75 | 1.1579 | 1.0806 | 0.9342 | 1.004  | 0.7401 | 0.4374 | 0.803  | 0.658  | 0.5239 | 0.1914 | 0.3106 |
| 17    | 1.1715 | 1.0952 | 0.9517 | 1.0183 | 0.7559 | 0.4457 | 0.8197 | 0.6709 | 0.537  | 0.1934 | 0.3119 |
| 17.25 | 1.1858 | 1.1114 | 0.9682 | 1.0309 | 0.7711 | 0.4554 | 0.838  | 0.6804 | 0.5515 | 0.1934 | 0.3133 |
| 17.5  | 1.2004 | 1.1256 | 0.9855 | 1.0424 | 0.7874 | 0.4621 | 0.8529 | 0.6915 | 0.5639 | 0.1944 | 0.3148 |
| 17.75 | 1.2123 | 1.1388 | 1.0016 | 1.0542 | 0.8039 | 0.4704 | 0.8695 | 0.702  | 0.5771 | 0.1953 | 0.3159 |
| 18    | 1.2261 | 1.1522 | 1.015  | 1.0684 | 0.8166 | 0.48   | 0.8852 | 0.7119 | 0.5893 | 0.196  | 0.3171 |

|       |        |        |        |        |        |        |        |        |        |        |        |
|-------|--------|--------|--------|--------|--------|--------|--------|--------|--------|--------|--------|
| 18.25 | 1.239  | 1.1664 | 1.0307 | 1.0776 | 0.8301 | 0.489  | 0.9032 | 0.7221 | 0.6029 | 0.1975 | 0.3174 |
| 18.5  | 1.251  | 1.1779 | 1.0478 | 1.0899 | 0.8419 | 0.4988 | 0.9188 | 0.7329 | 0.6168 | 0.1991 | 0.3189 |
| 18.75 | 1.2641 | 1.1907 | 1.0607 | 1.1006 | 0.8553 | 0.5073 | 0.9367 | 0.7428 | 0.6286 | 0.1993 | 0.3207 |
| 19    | 1.2773 | 1.2018 | 1.0765 | 1.112  | 0.8708 | 0.5169 | 0.9512 | 0.7548 | 0.6408 | 0.2003 | 0.3215 |
| 19.25 | 1.2907 | 1.2145 | 1.0891 | 1.1213 | 0.8829 | 0.5269 | 0.967  | 0.7646 | 0.655  | 0.2024 | 0.323  |
| 19.5  | 1.3032 | 1.2259 | 1.1041 | 1.1342 | 0.8961 | 0.5375 | 0.9835 | 0.7744 | 0.6682 | 0.203  | 0.3246 |
| 19.75 | 1.3141 | 1.239  | 1.1166 | 1.1445 | 0.9097 | 0.5484 | 0.9984 | 0.7852 | 0.6812 | 0.2044 | 0.3258 |
| 20    | 1.3251 | 1.2497 | 1.1283 | 1.1522 | 0.9212 | 0.5588 | 1.0143 | 0.7953 | 0.6935 | 0.2053 | 0.3279 |
| 20.25 | 1.3374 | 1.2637 | 1.1419 | 1.1617 | 0.9339 | 0.5701 | 1.0286 | 0.805  | 0.7058 | 0.2065 | 0.3294 |
| 20.5  | 1.3474 | 1.2743 | 1.1521 | 1.1718 | 0.9448 | 0.5808 | 1.0436 | 0.8153 | 0.7172 | 0.2078 | 0.3303 |
| 20.75 | 1.3589 | 1.2848 | 1.1637 | 1.1805 | 0.9567 | 0.5905 | 1.0543 | 0.8256 | 0.7291 | 0.2081 | 0.3318 |
| 21    | 1.3704 | 1.2956 | 1.1744 | 1.1901 | 0.9652 | 0.6042 | 1.0715 | 0.8365 | 0.7392 | 0.2101 | 0.3327 |
| 21.25 | 1.3806 | 1.3083 | 1.1829 | 1.1974 | 0.9762 | 0.6138 | 1.0847 | 0.8462 | 0.7502 | 0.2107 | 0.3339 |
| 21.5  | 1.39   | 1.3184 | 1.1906 | 1.2075 | 0.9845 | 0.6245 | 1.0995 | 0.8567 | 0.7617 | 0.2121 | 0.3361 |
| 21.75 | 1.3999 | 1.3289 | 1.2037 | 1.2155 | 0.994  | 0.6357 | 1.1122 | 0.8672 | 0.7718 | 0.2133 | 0.3364 |
| 22    | 1.4093 | 1.3395 | 1.2116 | 1.2243 | 1.0049 | 0.6469 | 1.1241 | 0.8779 | 0.7809 | 0.2142 | 0.3379 |
| 22.25 | 1.4189 | 1.3493 | 1.2223 | 1.2311 | 1.0129 | 0.6579 | 1.1383 | 0.8877 | 0.7913 | 0.2151 | 0.3384 |
| 22.5  | 1.4278 | 1.3589 | 1.2316 | 1.24   | 1.0234 | 0.6676 | 1.1498 | 0.899  | 0.8011 | 0.2164 | 0.3404 |
| 22.75 | 1.4356 | 1.369  | 1.2391 | 1.2454 | 1.0294 | 0.68   | 1.1626 | 0.9083 | 0.8109 | 0.2178 | 0.3424 |
| 23    | 1.4425 | 1.3781 | 1.2485 | 1.255  | 1.0392 | 0.6911 | 1.1748 | 0.9182 | 0.8212 | 0.219  | 0.3429 |
| 23.25 | 1.4488 | 1.3861 | 1.257  | 1.2609 | 1.0474 | 0.7034 | 1.1876 | 0.9298 | 0.8291 | 0.22   | 0.3439 |
| 23.5  | 1.4527 | 1.3947 | 1.2667 | 1.2704 | 1.0565 | 0.7144 | 1.1995 | 0.9401 | 0.8383 | 0.2207 | 0.3458 |
| 23.75 | 1.4559 | 1.4037 | 1.2752 | 1.2752 | 1.0636 | 0.7259 | 1.21   | 0.951  | 0.8476 | 0.2218 | 0.3467 |
| 24    | 1.4583 | 1.4119 | 1.2845 | 1.2835 | 1.0717 | 0.7361 | 1.2225 | 0.9609 | 0.857  | 0.2229 | 0.3478 |
| 24.25 | 1.4609 | 1.4188 | 1.2937 | 1.2922 | 1.0791 | 0.749  | 1.2337 | 0.9727 | 0.8667 | 0.2244 | 0.3491 |
| 24.5  | 1.4615 | 1.4276 | 1.3014 | 1.2971 | 1.0865 | 0.7614 | 1.2469 | 0.9829 | 0.874  | 0.2252 | 0.35   |
| 24.75 | 1.4635 | 1.4341 | 1.3101 | 1.3027 | 1.0961 | 0.7702 | 1.2573 | 0.9948 | 0.8829 | 0.2262 | 0.352  |
| 25    | 1.466  | 1.4379 | 1.3177 | 1.3092 | 1.1046 | 0.7823 | 1.2684 | 1.004  | 0.8938 | 0.2275 | 0.353  |
| 25.25 | 1.4669 | 1.4431 | 1.3269 | 1.3148 | 1.1096 | 0.7942 | 1.2789 | 1.0147 | 0.9006 | 0.2287 | 0.3541 |
| 25.5  | 1.4687 | 1.4476 | 1.3358 | 1.32   | 1.1185 | 0.805  | 1.2891 | 1.0255 | 0.9091 | 0.2294 | 0.3554 |
| 25.75 | 1.4687 | 1.4518 | 1.345  | 1.3252 | 1.1238 | 0.8146 | 1.2987 | 1.0356 | 0.918  | 0.2305 | 0.3566 |
| 26    | 1.4682 | 1.453  | 1.3526 | 1.3307 | 1.1333 | 0.8253 | 1.3088 | 1.044  | 0.9259 | 0.2323 | 0.3583 |
| 26.25 | 1.4704 | 1.4557 | 1.3577 | 1.3338 | 1.1385 | 0.8357 | 1.3163 | 1.0544 | 0.9368 | 0.2323 | 0.3594 |
| 26.5  | 1.4702 | 1.4595 | 1.368  | 1.3401 | 1.1454 | 0.8459 | 1.326  | 1.0643 | 0.9439 | 0.2334 | 0.3602 |
| 26.75 | 1.4706 | 1.4619 | 1.3756 | 1.3418 | 1.1535 | 0.855  | 1.3344 | 1.0756 | 0.9531 | 0.2341 | 0.3616 |
| 27    | 1.4716 | 1.4639 | 1.3808 | 1.3444 | 1.1616 | 0.8655 | 1.3424 | 1.086  | 0.9621 | 0.2357 | 0.3629 |
| 27.25 | 1.4725 | 1.4677 | 1.3894 | 1.3476 | 1.169  | 0.8759 | 1.3504 | 1.095  | 0.9703 | 0.2368 | 0.3636 |
| 27.5  | 1.473  | 1.4709 | 1.396  | 1.3501 | 1.1741 | 0.8852 | 1.3578 | 1.105  | 0.9801 | 0.2372 | 0.3644 |
| 27.75 | 1.4747 | 1.4735 | 1.4025 | 1.3504 | 1.1818 | 0.8953 | 1.3655 | 1.1155 | 0.9868 | 0.2383 | 0.3665 |
| 28    | 1.4747 | 1.4758 | 1.4095 | 1.3521 | 1.1876 | 0.9064 | 1.3716 | 1.126  | 0.998  | 0.2394 | 0.3666 |
| 28.25 | 1.4772 | 1.4784 | 1.4156 | 1.354  | 1.1953 | 0.9147 | 1.3792 | 1.1369 | 1.0058 | 0.2404 | 0.3686 |
| 28.5  | 1.4758 | 1.4806 | 1.4201 | 1.3563 | 1.2009 | 0.9261 | 1.3837 | 1.1466 | 1.0144 | 0.2414 | 0.3704 |

|       |        |        |        |        |        |        |        |        |        |        |        |
|-------|--------|--------|--------|--------|--------|--------|--------|--------|--------|--------|--------|
| 28.75 | 1.4763 | 1.4813 | 1.4239 | 1.3562 | 1.2088 | 0.9324 | 1.3884 | 1.1552 | 1.0236 | 0.2422 | 0.3707 |
| 29    | 1.4771 | 1.4829 | 1.4289 | 1.357  | 1.2144 | 0.9442 | 1.3932 | 1.1659 | 1.0324 | 0.2431 | 0.3722 |
| 29.25 | 1.4786 | 1.485  | 1.4341 | 1.3582 | 1.2214 | 0.9536 | 1.3967 | 1.1763 | 1.0423 | 0.2442 | 0.3723 |
| 29.5  | 1.4803 | 1.4861 | 1.4367 | 1.3575 | 1.2267 | 0.9635 | 1.3994 | 1.1866 | 1.0504 | 0.2444 | 0.3743 |
| 29.75 | 1.4807 | 1.4866 | 1.4387 | 1.3587 | 1.2334 | 0.9695 | 1.4014 | 1.1969 | 1.0594 | 0.2458 | 0.3752 |
| 30    | 1.4823 | 1.4892 | 1.4412 | 1.3575 | 1.2385 | 0.9806 | 1.4039 | 1.205  | 1.0696 | 0.2472 | 0.3766 |
| 30.25 | 1.4831 | 1.49   | 1.4444 | 1.3576 | 1.2444 | 0.9921 | 1.4062 | 1.2154 | 1.0784 | 0.2488 | 0.3773 |
| 30.5  | 1.4829 | 1.4913 | 1.4444 | 1.3587 | 1.2493 | 1.0003 | 1.4051 | 1.2243 | 1.0856 | 0.2491 | 0.3792 |
| 30.75 | 1.4823 | 1.4923 | 1.4446 | 1.3579 | 1.2542 | 1.0086 | 1.4048 | 1.2333 | 1.0953 | 0.2506 | 0.38   |
| 31    | 1.4825 | 1.4929 | 1.4466 | 1.3576 | 1.2595 | 1.0176 | 1.4048 | 1.2409 | 1.1033 | 0.2514 | 0.3812 |
| 31.25 | 1.4843 | 1.4939 | 1.448  | 1.3564 | 1.2633 | 1.0272 | 1.4033 | 1.2507 | 1.111  | 0.2525 | 0.3829 |
| 31.5  | 1.4842 | 1.496  | 1.4475 | 1.3559 | 1.2689 | 1.0363 | 1.4031 | 1.2587 | 1.1196 | 0.253  | 0.3834 |
| 31.75 | 1.4837 | 1.4956 | 1.4475 | 1.3549 | 1.2744 | 1.0442 | 1.402  | 1.2668 | 1.128  | 0.2547 | 0.3846 |
| 32    | 1.4837 | 1.4964 | 1.4488 | 1.3547 | 1.2741 | 1.0536 | 1.4016 | 1.2741 | 1.1341 | 0.2547 | 0.3852 |
| 32.25 | 1.4847 | 1.4969 | 1.4483 | 1.3551 | 1.2792 | 1.0618 | 1.3999 | 1.2817 | 1.1422 | 0.2559 | 0.386  |
| 32.5  | 1.4848 | 1.4964 | 1.448  | 1.354  | 1.2813 | 1.0683 | 1.4    | 1.2894 | 1.1515 | 0.2571 | 0.3883 |
| 32.75 | 1.4858 | 1.4974 | 1.448  | 1.3548 | 1.2844 | 1.078  | 1.3989 | 1.2969 | 1.157  | 0.2583 | 0.3884 |
| 33    | 1.4867 | 1.4992 | 1.4467 | 1.3541 | 1.286  | 1.0856 | 1.4002 | 1.3044 | 1.1656 | 0.2591 | 0.39   |
| 33.25 | 1.4876 | 1.498  | 1.4476 | 1.3525 | 1.2871 | 1.0924 | 1.3989 | 1.3116 | 1.1721 | 0.2595 | 0.3907 |
| 33.5  | 1.4885 | 1.4993 | 1.4481 | 1.3513 | 1.2876 | 1.1011 | 1.3984 | 1.3195 | 1.1817 | 0.2607 | 0.3928 |
| 33.75 | 1.4883 | 1.4994 | 1.4469 | 1.3513 | 1.291  | 1.1094 | 1.3974 | 1.3262 | 1.1885 | 0.2612 | 0.394  |
| 34    | 1.4888 | 1.4988 | 1.4474 | 1.3511 | 1.2902 | 1.1189 | 1.3982 | 1.3331 | 1.1949 | 0.2618 | 0.3937 |
| 34.25 | 1.4892 | 1.4995 | 1.4471 | 1.3515 | 1.2888 | 1.1262 | 1.398  | 1.34   | 1.2021 | 0.2629 | 0.3962 |
| 34.5  | 1.4899 | 1.4996 | 1.4474 | 1.3513 | 1.2893 | 1.1342 | 1.3987 | 1.3451 | 1.2105 | 0.2639 | 0.3968 |
| 34.75 | 1.4919 | 1.5003 | 1.4472 | 1.3497 | 1.2906 | 1.1404 | 1.3993 | 1.3524 | 1.2161 | 0.2653 | 0.3966 |
| 35    | 1.492  | 1.5014 | 1.4486 | 1.3493 | 1.2897 | 1.1478 | 1.3976 | 1.3599 | 1.2237 | 0.2647 | 0.3976 |
| 35.25 | 1.4922 | 1.502  | 1.4486 | 1.349  | 1.2918 | 1.1539 | 1.3975 | 1.366  | 1.2308 | 0.2665 | 0.4004 |
| 35.5  | 1.4933 | 1.5004 | 1.4477 | 1.3495 | 1.2913 | 1.1599 | 1.3969 | 1.3721 | 1.236  | 0.2675 | 0.4011 |
| 35.75 | 1.4939 | 1.5019 | 1.4479 | 1.3499 | 1.2913 | 1.168  | 1.397  | 1.3761 | 1.2429 | 0.2684 | 0.4016 |
| 36    | 1.4951 | 1.5018 | 1.4476 | 1.3483 | 1.2918 | 1.1743 | 1.3976 | 1.3802 | 1.248  | 0.2687 | 0.4026 |
| 36.25 | 1.4965 | 1.5015 | 1.4469 | 1.3499 | 1.2912 | 1.1802 | 1.3971 | 1.3843 | 1.2549 | 0.2701 | 0.405  |
| 36.5  | 1.4976 | 1.5021 | 1.4473 | 1.3491 | 1.2915 | 1.1869 | 1.396  | 1.3869 | 1.2624 | 0.2706 | 0.4055 |
| 36.75 | 1.4983 | 1.5037 | 1.4481 | 1.3493 | 1.2929 | 1.1945 | 1.3977 | 1.391  | 1.27   | 0.2727 | 0.4069 |
| 37    | 1.4992 | 1.5034 | 1.4477 | 1.3494 | 1.2923 | 1.1987 | 1.3968 | 1.3917 | 1.2739 | 0.2731 | 0.407  |
| 37.25 | 1.4997 | 1.504  | 1.449  | 1.3489 | 1.2922 | 1.2025 | 1.3959 | 1.3933 | 1.2806 | 0.2736 | 0.4087 |
| 37.5  | 1.5011 | 1.5037 | 1.4489 | 1.3485 | 1.2917 | 1.2071 | 1.3958 | 1.3939 | 1.2865 | 0.2743 | 0.4101 |
| 37.75 | 1.502  | 1.505  | 1.4486 | 1.3476 | 1.2923 | 1.2084 | 1.3957 | 1.3941 | 1.2914 | 0.275  | 0.4096 |
| 38    | 1.5029 | 1.5047 | 1.4475 | 1.3474 | 1.2931 | 1.2125 | 1.3952 | 1.3934 | 1.2973 | 0.2768 | 0.4113 |
| 38.25 | 1.5029 | 1.5046 | 1.449  | 1.3475 | 1.2919 | 1.2153 | 1.3952 | 1.3928 | 1.3017 | 0.2763 | 0.4117 |
| 38.5  | 1.504  | 1.505  | 1.4481 | 1.3462 | 1.2915 | 1.2177 | 1.3947 | 1.3937 | 1.3082 | 0.278  | 0.4121 |
| 38.75 | 1.5035 | 1.5042 | 1.448  | 1.3466 | 1.2926 | 1.2175 | 1.3946 | 1.3913 | 1.3123 | 0.278  | 0.4141 |
| 39    | 1.5042 | 1.505  | 1.4488 | 1.3468 | 1.2919 | 1.218  | 1.3952 | 1.3899 | 1.3156 | 0.2791 | 0.4144 |



|       |        |        |        |        |        |        |        |        |        |        |        |
|-------|--------|--------|--------|--------|--------|--------|--------|--------|--------|--------|--------|
| 39.25 | 1.5058 | 1.5049 | 1.4482 | 1.3456 | 1.2937 | 1.2187 | 1.3946 | 1.3895 | 1.3183 | 0.2808 | 0.4147 |
| 39.5  | 1.507  | 1.5052 | 1.4485 | 1.3462 | 1.2931 | 1.2205 | 1.3946 | 1.3879 | 1.3234 | 0.2807 | 0.416  |
| 39.75 | 1.5073 | 1.506  | 1.4484 | 1.3451 | 1.294  | 1.2209 | 1.3949 | 1.3862 | 1.3263 | 0.2818 | 0.4164 |
| 40    | 1.5077 | 1.5062 | 1.4489 | 1.3442 | 1.2921 | 1.2207 | 1.3947 | 1.3862 | 1.3267 | 0.2819 | 0.4172 |
| 40.25 | 1.5093 | 1.5063 | 1.4496 | 1.3505 | 1.2938 | 1.221  | 1.3944 | 1.3862 | 1.3296 | 0.2836 | 0.4191 |
| 40.5  | 1.5096 | 1.506  | 1.4489 | 1.3441 | 1.2944 | 1.221  | 1.3948 | 1.3844 | 1.3313 | 0.2837 | 0.4188 |
| 40.75 | 1.5108 | 1.5059 | 1.4494 | 1.3431 | 1.2941 | 1.2211 | 1.3936 | 1.3844 | 1.3315 | 0.2849 | 0.4205 |
| 41    | 1.5129 | 1.5053 | 1.4485 | 1.3434 | 1.2922 | 1.2216 | 1.3932 | 1.3825 | 1.3325 | 0.2845 | 0.4197 |
| 41.25 | 1.5127 | 1.5048 | 1.4491 | 1.3439 | 1.2932 | 1.2213 | 1.3945 | 1.3822 | 1.3325 | 0.286  | 0.4206 |
| 41.5  | 1.513  | 1.5052 | 1.4495 | 1.3431 | 1.2931 | 1.2211 | 1.3935 | 1.3817 | 1.3324 | 0.2869 | 0.4212 |
| 41.75 | 1.513  | 1.5045 | 1.4496 | 1.3434 | 1.2932 | 1.2211 | 1.3936 | 1.3814 | 1.3323 | 0.2871 | 0.4222 |
| 42    | 1.5143 | 1.506  | 1.4492 | 1.3435 | 1.2926 | 1.2225 | 1.3939 | 1.3812 | 1.3334 | 0.2885 | 0.4226 |
| 42.25 | 1.5164 | 1.506  | 1.4512 | 1.344  | 1.2934 | 1.2225 | 1.395  | 1.3803 | 1.3317 | 0.2894 | 0.4237 |
| 42.5  | 1.5166 | 1.5062 | 1.4516 | 1.3437 | 1.2933 | 1.223  | 1.394  | 1.3823 | 1.3305 | 0.2898 | 0.4251 |
| 42.75 | 1.518  | 1.506  | 1.4518 | 1.343  | 1.2925 | 1.2224 | 1.3939 | 1.3812 | 1.3308 | 0.2908 | 0.4257 |
| 43    | 1.5154 | 1.5053 | 1.4522 | 1.3444 | 1.2949 | 1.2227 | 1.3956 | 1.3818 | 1.3329 | 0.2916 | 0.4268 |
| 43.25 | 1.5129 | 1.5059 | 1.4522 | 1.3441 | 1.2936 | 1.2237 | 1.3951 | 1.3812 | 1.333  | 0.2934 | 0.4279 |
| 43.5  | 1.5111 | 1.5064 | 1.4527 | 1.3438 | 1.2938 | 1.2248 | 1.3953 | 1.3805 | 1.3307 | 0.294  | 0.4296 |
| 43.75 | 1.5114 | 1.5084 | 1.453  | 1.343  | 1.2933 | 1.2257 | 1.3956 | 1.3813 | 1.3319 | 0.2957 | 0.4297 |
| 44    | 1.5125 | 1.5078 | 1.4529 | 1.3429 | 1.2942 | 1.2254 | 1.3959 | 1.3811 | 1.3319 | 0.2958 | 0.4301 |
| 44.25 | 1.5102 | 1.5073 | 1.4529 | 1.3426 | 1.2931 | 1.2253 | 1.3955 | 1.3815 | 1.3326 | 0.2963 | 0.4312 |
| 44.5  | 1.5105 | 1.5065 | 1.4523 | 1.3431 | 1.2938 | 1.2249 | 1.3956 | 1.3815 | 1.3324 | 0.297  | 0.4325 |
| 44.75 | 1.5104 | 1.5065 | 1.454  | 1.343  | 1.2933 | 1.2256 | 1.3958 | 1.3817 | 1.3317 | 0.2978 | 0.433  |
| 45    | 1.5092 | 1.5064 | 1.4543 | 1.3427 | 1.2941 | 1.2252 | 1.3968 | 1.3822 | 1.3331 | 0.2986 | 0.4337 |
| 45.25 | 1.5105 | 1.5057 | 1.4541 | 1.3427 | 1.2946 | 1.2258 | 1.3966 | 1.3822 | 1.3317 | 0.2997 | 0.4345 |
| 45.5  | 1.5103 | 1.5065 | 1.4557 | 1.3424 | 1.2935 | 1.2259 | 1.397  | 1.382  | 1.3326 | 0.3002 | 0.435  |
| 45.75 | 1.51   | 1.5067 | 1.4559 | 1.3424 | 1.2939 | 1.2268 | 1.3973 | 1.3821 | 1.3321 | 0.3011 | 0.4357 |
| 46    | 1.5108 | 1.5061 | 1.4561 | 1.342  | 1.2935 | 1.227  | 1.3969 | 1.3836 | 1.3329 | 0.3026 | 0.4364 |
| 46.25 | 1.5109 | 1.5064 | 1.456  | 1.3425 | 1.2923 | 1.2267 | 1.398  | 1.3835 | 1.3316 | 0.3026 | 0.4371 |
| 46.5  | 1.511  | 1.5069 | 1.4571 | 1.3427 | 1.2928 | 1.2265 | 1.3981 | 1.3844 | 1.3323 | 0.3036 | 0.4379 |
| 46.75 | 1.511  | 1.5052 | 1.4577 | 1.3424 | 1.2925 | 1.2254 | 1.398  | 1.3846 | 1.3323 | 0.3038 | 0.4385 |
| 47    | 1.5111 | 1.5059 | 1.4574 | 1.3424 | 1.2939 | 1.2267 | 1.3982 | 1.3852 | 1.3331 | 0.3057 | 0.4389 |
| 47.25 | 1.5102 | 1.5042 | 1.4571 | 1.342  | 1.2948 | 1.2256 | 1.3982 | 1.3859 | 1.3319 | 0.3067 | 0.44   |
| 47.5  | 1.5112 | 1.5044 | 1.4583 | 1.3418 | 1.2935 | 1.2253 | 1.3978 | 1.3865 | 1.3329 | 0.3071 | 0.4408 |
| 47.75 | 1.5109 | 1.5036 | 1.4575 | 1.341  | 1.294  | 1.2251 | 1.3983 | 1.3882 | 1.3334 | 0.3072 | 0.442  |
| 48    | 1.511  | 1.5046 | 1.4582 | 1.341  | 1.2943 | 1.2253 | 1.3977 | 1.3882 | 1.3329 | 0.3089 | 0.4413 |
| 48.25 | 1.511  | 1.5042 | 1.4587 | 1.3414 | 1.2934 | 1.2237 | 1.3974 | 1.3879 | 1.3341 | 0.3089 | 0.4428 |
| 48.5  | 1.5111 | 1.504  | 1.4592 | 1.3404 | 1.2948 | 1.2251 | 1.3986 | 1.3882 | 1.3325 | 0.3098 | 0.4424 |
| 48.75 | 1.5107 | 1.5019 | 1.4578 | 1.3412 | 1.2935 | 1.2241 | 1.399  | 1.389  | 1.3323 | 0.3101 | 0.4439 |
| 49    | 1.5112 | 1.5026 | 1.4586 | 1.3423 | 1.2941 | 1.2248 | 1.4002 | 1.3905 | 1.3327 | 0.3115 | 0.4431 |
| 49.25 | 1.5109 | 1.5034 | 1.4604 | 1.3405 | 1.2929 | 1.2252 | 1.3977 | 1.3903 | 1.3325 | 0.3129 | 0.4438 |
| 49.5  | 1.5094 | 1.504  | 1.4603 | 1.3404 | 1.2924 | 1.2249 | 1.3992 | 1.3908 | 1.3308 | 0.3136 | 0.4446 |

|       |        |        |        |        |        |        |        |        |        |        |        |
|-------|--------|--------|--------|--------|--------|--------|--------|--------|--------|--------|--------|
| 49.75 | 1.5105 | 1.5038 | 1.4602 | 1.3404 | 1.2931 | 1.2244 | 1.3991 | 1.3915 | 1.3321 | 0.3148 | 0.4448 |
|-------|--------|--------|--------|--------|--------|--------|--------|--------|--------|--------|--------|

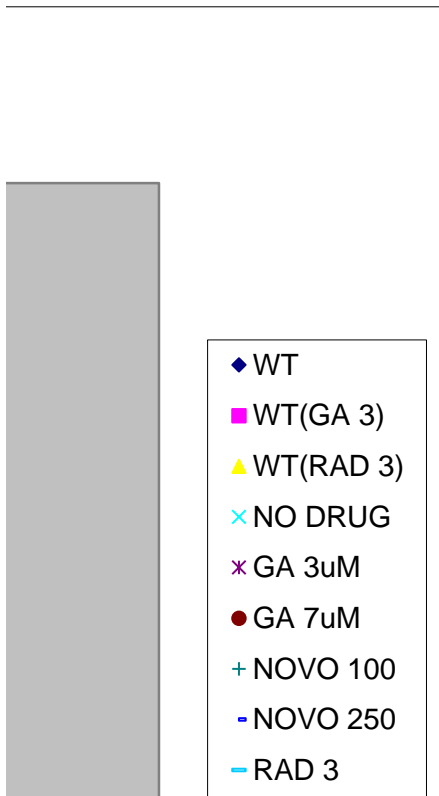

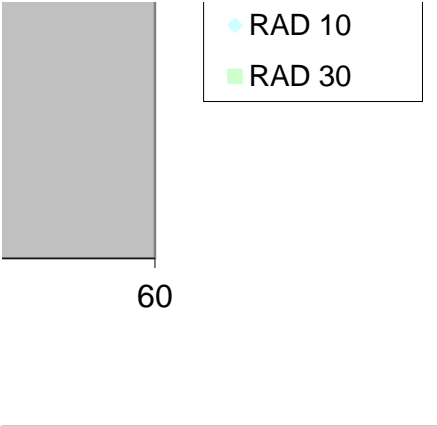

TOM 1

N1 N2 N3 N4 N5 N6 N7 N8

| TIME | WT     | WT(GA 3) | WT(RAD 3) | NO DRUG | GA 3uM | GA 7uM | NOVO 10 | NOVO 250 | RAD 3  | RAD 10 | RAD 30 |
|------|--------|----------|-----------|---------|--------|--------|---------|----------|--------|--------|--------|
| 0    | 0.1894 | 0.2051   | 0.1892    | 0.1517  | 0.1706 | 0.1531 | 0.199   | 0.2454   | 0.1742 | 0.1578 | 0.1649 |
| 0.25 | 0.1844 | 0.1929   | 0.1812    | 0.1471  | 0.1614 | 0.1433 | 0.2022  | 0.2436   | 0.1566 | 0.1481 | 0.1521 |
| 0.5  | 0.1833 | 0.1912   | 0.1787    | 0.1453  | 0.1584 | 0.1425 | 0.2043  | 0.2415   | 0.1545 | 0.1443 | 0.15   |
| 0.75 | 0.1838 | 0.189    | 0.1758    | 0.1441  | 0.157  | 0.1407 | 0.2048  | 0.2447   | 0.1525 | 0.1428 | 0.1484 |
| 1    | 0.1843 | 0.1877   | 0.1818    | 0.145   | 0.1572 | 0.1415 | 0.2066  | 0.2508   | 0.1525 | 0.1426 | 0.1493 |
| 1.25 | 0.1867 | 0.1862   | 0.1836    | 0.1458  | 0.1572 | 0.1422 | 0.2076  | 0.2509   | 0.1535 | 0.1426 | 0.1493 |
| 1.5  | 0.188  | 0.186    | 0.1823    | 0.1453  | 0.1569 | 0.142  | 0.2085  | 0.2524   | 0.1526 | 0.1427 | 0.1505 |

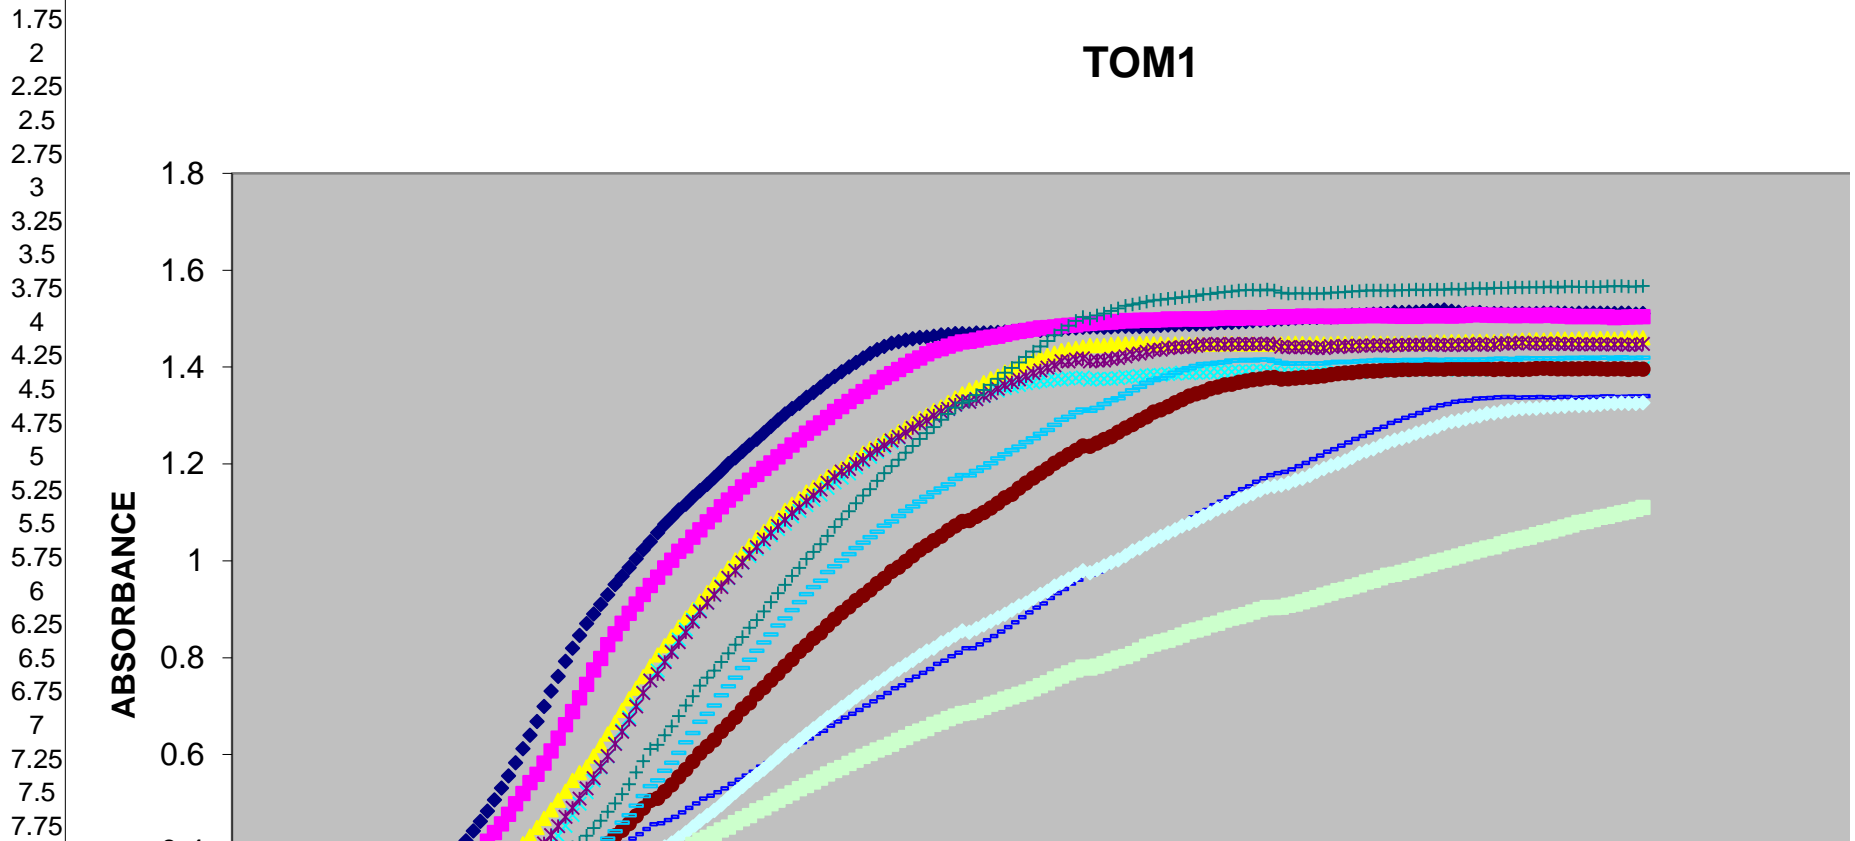

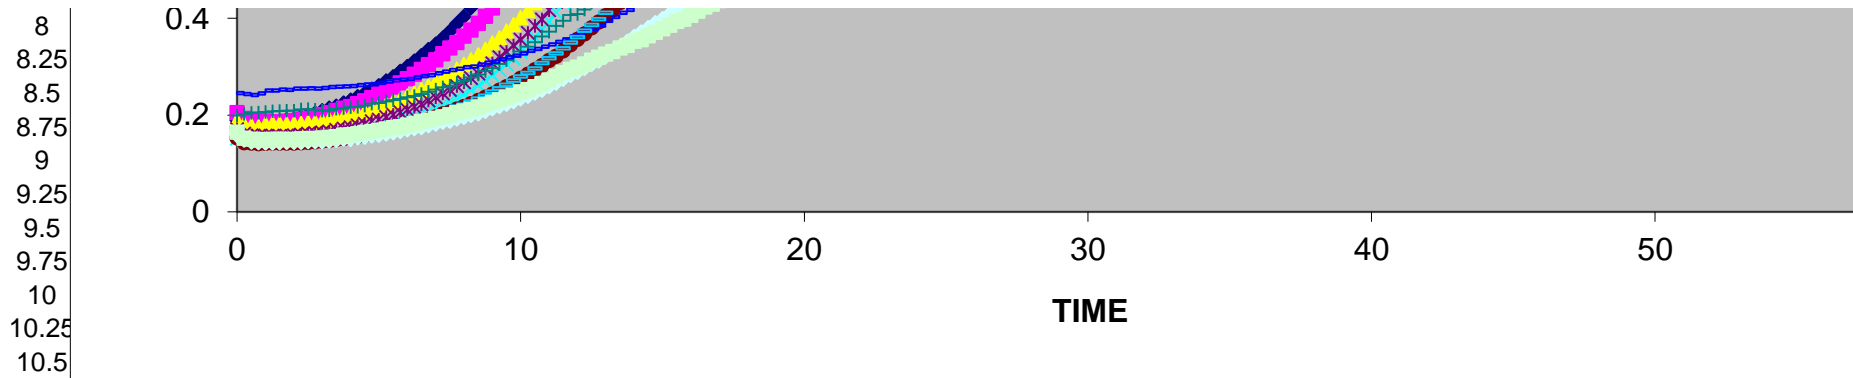

|       |        |        |        |        |        |        |        |        |        |        |        |
|-------|--------|--------|--------|--------|--------|--------|--------|--------|--------|--------|--------|
| 10.75 | 0.6685 | 0.5593 | 0.4497 | 0.3766 | 0.3975 | 0.3023 | 0.3625 | 0.3411 | 0.3076 | 0.2512 | 0.265  |
| 11    | 0.6992 | 0.5825 | 0.4678 | 0.3936 | 0.4164 | 0.3129 | 0.3724 | 0.346  | 0.3171 | 0.2587 | 0.2728 |
| 11.25 | 0.7307 | 0.6075 | 0.4857 | 0.4122 | 0.4334 | 0.3212 | 0.3843 | 0.3509 | 0.3271 | 0.2657 | 0.2799 |
| 11.5  | 0.7614 | 0.6339 | 0.5059 | 0.4324 | 0.4519 | 0.3323 | 0.3946 | 0.3567 | 0.3379 | 0.2735 | 0.288  |
| 11.75 | 0.7927 | 0.6618 | 0.5242 | 0.4531 | 0.4711 | 0.3449 | 0.4067 | 0.3624 | 0.3499 | 0.2817 | 0.294  |
| 12    | 0.8194 | 0.6889 | 0.5464 | 0.4752 | 0.4897 | 0.3561 | 0.4083 | 0.3693 | 0.3607 | 0.2885 | 0.2988 |
| 12.25 | 0.8459 | 0.7168 | 0.5622 | 0.4984 | 0.5091 | 0.3678 | 0.4175 | 0.3745 | 0.3743 | 0.2961 | 0.3055 |
| 12.5  | 0.8706 | 0.7448 | 0.5743 | 0.522  | 0.53   | 0.3803 | 0.4323 | 0.3784 | 0.3861 | 0.3048 | 0.3137 |
| 12.75 | 0.8904 | 0.7744 | 0.5968 | 0.5468 | 0.5515 | 0.3919 | 0.448  | 0.3847 | 0.3977 | 0.3115 | 0.3191 |
| 13    | 0.9099 | 0.7982 | 0.6186 | 0.5729 | 0.5741 | 0.4051 | 0.4635 | 0.3946 | 0.4109 | 0.3205 | 0.3257 |
| 13.25 | 0.9301 | 0.8269 | 0.6426 | 0.5964 | 0.5971 | 0.4164 | 0.4817 | 0.4028 | 0.4267 | 0.3317 | 0.3314 |
| 13.5  | 0.9508 | 0.849  | 0.6665 | 0.6232 | 0.6219 | 0.4323 | 0.4991 | 0.4109 | 0.4415 | 0.3419 | 0.3385 |
| 13.75 | 0.9679 | 0.8707 | 0.6913 | 0.6494 | 0.647  | 0.4433 | 0.5181 | 0.4171 | 0.4592 | 0.3518 | 0.3441 |
| 14    | 0.986  | 0.8918 | 0.7152 | 0.676  | 0.6721 | 0.4576 | 0.5387 | 0.4264 | 0.4748 | 0.3621 | 0.3523 |
| 14.25 | 1.0047 | 0.9106 | 0.7372 | 0.7031 | 0.6992 | 0.473  | 0.5631 | 0.4359 | 0.4942 | 0.3718 | 0.356  |
| 14.5  | 1.0233 | 0.9308 | 0.7608 | 0.7285 | 0.7267 | 0.4892 | 0.5863 | 0.4465 | 0.5145 | 0.3805 | 0.3637 |
| 14.75 | 1.0397 | 0.9491 | 0.7825 | 0.7525 | 0.7526 | 0.5053 | 0.6116 | 0.4561 | 0.5345 | 0.3909 | 0.3709 |
| 15    | 1.0577 | 0.966  | 0.8057 | 0.7732 | 0.7659 | 0.5097 | 0.62   | 0.458  | 0.5467 | 0.3995 | 0.3785 |
| 15.25 | 1.0753 | 0.9853 | 0.8251 | 0.7949 | 0.791  | 0.5237 | 0.6397 | 0.4644 | 0.5666 | 0.4089 | 0.3854 |
| 15.5  | 1.0897 | 1.0015 | 0.8439 | 0.8141 | 0.8118 | 0.5372 | 0.6581 | 0.4711 | 0.583  | 0.4171 | 0.3936 |
| 15.75 | 1.1049 | 1.0198 | 0.8628 | 0.8376 | 0.8321 | 0.554  | 0.6793 | 0.4805 | 0.6033 | 0.4277 | 0.3982 |
| 16    | 1.1171 | 1.031  | 0.8817 | 0.8587 | 0.8524 | 0.569  | 0.7012 | 0.4898 | 0.6253 | 0.4381 | 0.4058 |
| 16.25 | 1.1316 | 1.0487 | 0.8996 | 0.8782 | 0.8746 | 0.5858 | 0.7205 | 0.4988 | 0.6446 | 0.45   | 0.4142 |
| 16.5  | 1.1443 | 1.0637 | 0.9165 | 0.898  | 0.8957 | 0.6025 | 0.7424 | 0.5091 | 0.6678 | 0.4629 | 0.4229 |
| 16.75 | 1.1579 | 1.0806 | 0.9342 | 0.9134 | 0.9132 | 0.6168 | 0.7585 | 0.515  | 0.6839 | 0.4739 | 0.4288 |
| 17    | 1.1715 | 1.0952 | 0.9517 | 0.9291 | 0.9297 | 0.6301 | 0.7735 | 0.522  | 0.7012 | 0.4846 | 0.4362 |
| 17.25 | 1.1858 | 1.1114 | 0.9682 | 0.9479 | 0.9455 | 0.6474 | 0.7912 | 0.5302 | 0.7223 | 0.4967 | 0.4441 |
| 17.5  | 1.2004 | 1.1256 | 0.9855 | 0.9642 | 0.9647 | 0.6621 | 0.8088 | 0.5396 | 0.7406 | 0.5095 | 0.4502 |
| 17.75 | 1.2123 | 1.1388 | 1.0016 | 0.9808 | 0.9797 | 0.6769 | 0.8265 | 0.548  | 0.7587 | 0.5219 | 0.4593 |
| 18    | 1.2261 | 1.1522 | 1.015  | 0.9959 | 0.9964 | 0.6941 | 0.8427 | 0.5565 | 0.7784 | 0.5341 | 0.4672 |
| 18.25 | 1.239  | 1.1664 | 1.0307 | 1.0096 | 1.0144 | 0.7065 | 0.8619 | 0.5647 | 0.7959 | 0.5467 | 0.4741 |

|       |        |        |        |        |        |        |        |        |        |        |        |
|-------|--------|--------|--------|--------|--------|--------|--------|--------|--------|--------|--------|
| 18.5  | 1.251  | 1.1779 | 1.0478 | 1.0246 | 1.0285 | 0.7249 | 0.8775 | 0.5752 | 0.8142 | 0.5583 | 0.4841 |
| 18.75 | 1.2641 | 1.1907 | 1.0607 | 1.0365 | 1.0442 | 0.7384 | 0.8955 | 0.5821 | 0.8316 | 0.57   | 0.4901 |
| 19    | 1.2773 | 1.2018 | 1.0765 | 1.0527 | 1.0575 | 0.7534 | 0.9143 | 0.5919 | 0.8482 | 0.582  | 0.4985 |
| 19.25 | 1.2907 | 1.2145 | 1.0891 | 1.0654 | 1.072  | 0.7672 | 0.9331 | 0.5999 | 0.8665 | 0.5951 | 0.5056 |
| 19.5  | 1.3032 | 1.2259 | 1.1041 | 1.0762 | 1.0841 | 0.7822 | 0.95   | 0.6083 | 0.8812 | 0.608  | 0.5137 |
| 19.75 | 1.3141 | 1.239  | 1.1166 | 1.0919 | 1.098  | 0.7961 | 0.9688 | 0.617  | 0.8982 | 0.6178 | 0.5208 |
| 20    | 1.3251 | 1.2497 | 1.1283 | 1.1029 | 1.11   | 0.8126 | 0.9852 | 0.6255 | 0.9145 | 0.63   | 0.5296 |
| 20.25 | 1.3374 | 1.2637 | 1.1419 | 1.1149 | 1.1235 | 0.8255 | 1.004  | 0.6334 | 0.9309 | 0.6416 | 0.5359 |
| 20.5  | 1.3474 | 1.2743 | 1.1521 | 1.1258 | 1.1344 | 0.8397 | 1.0184 | 0.6428 | 0.946  | 0.6533 | 0.5432 |
| 20.75 | 1.3589 | 1.2848 | 1.1637 | 1.1364 | 1.1469 | 0.8513 | 1.0343 | 0.6491 | 0.9591 | 0.6641 | 0.551  |
| 21    | 1.3704 | 1.2956 | 1.1744 | 1.1506 | 1.161  | 0.8667 | 1.0512 | 0.6593 | 0.9768 | 0.6762 | 0.56   |
| 21.25 | 1.3806 | 1.3083 | 1.1829 | 1.1616 | 1.1728 | 0.8796 | 1.0696 | 0.6681 | 0.9886 | 0.6862 | 0.5673 |
| 21.5  | 1.39   | 1.3184 | 1.1906 | 1.1713 | 1.1839 | 0.8926 | 1.0858 | 0.6761 | 1.0008 | 0.6976 | 0.5733 |
| 21.75 | 1.3999 | 1.3289 | 1.2037 | 1.1801 | 1.1892 | 0.9046 | 1.1022 | 0.6841 | 1.0134 | 0.708  | 0.5814 |
| 22    | 1.4093 | 1.3395 | 1.2116 | 1.1926 | 1.1997 | 0.9179 | 1.119  | 0.692  | 1.0261 | 0.7192 | 0.5882 |
| 22.25 | 1.4189 | 1.3493 | 1.2223 | 1.2044 | 1.2085 | 0.9288 | 1.1348 | 0.7013 | 1.0375 | 0.7288 | 0.5959 |
| 22.5  | 1.4278 | 1.3589 | 1.2316 | 1.2145 | 1.2208 | 0.9396 | 1.1479 | 0.7101 | 1.0488 | 0.7389 | 0.6021 |
| 22.75 | 1.4356 | 1.369  | 1.2391 | 1.2251 | 1.229  | 0.9532 | 1.165  | 0.7186 | 1.0602 | 0.7469 | 0.6095 |
| 23    | 1.4425 | 1.3781 | 1.2485 | 1.2346 | 1.2383 | 0.9638 | 1.1807 | 0.7268 | 1.0728 | 0.7562 | 0.6147 |
| 23.25 | 1.4488 | 1.3861 | 1.257  | 1.2441 | 1.248  | 0.9778 | 1.1954 | 0.7372 | 1.0814 | 0.7673 | 0.6213 |
| 23.5  | 1.4527 | 1.3947 | 1.2667 | 1.2543 | 1.2555 | 0.9867 | 1.2088 | 0.7431 | 1.0924 | 0.7762 | 0.6293 |
| 23.75 | 1.4559 | 1.4037 | 1.2752 | 1.2651 | 1.2645 | 0.9986 | 1.2229 | 0.7531 | 1.1028 | 0.7853 | 0.6355 |
| 24    | 1.4583 | 1.4119 | 1.2845 | 1.2742 | 1.2742 | 1.0101 | 1.2367 | 0.7605 | 1.112  | 0.7946 | 0.643  |
| 24.25 | 1.4609 | 1.4188 | 1.2937 | 1.2827 | 1.2831 | 1.0225 | 1.2515 | 0.7689 | 1.122  | 0.8043 | 0.6487 |
| 24.5  | 1.4615 | 1.4276 | 1.3014 | 1.2889 | 1.2902 | 1.0318 | 1.2632 | 0.7766 | 1.1323 | 0.8135 | 0.654  |
| 24.75 | 1.4635 | 1.4341 | 1.3101 | 1.2989 | 1.2996 | 1.0415 | 1.2763 | 0.7869 | 1.1409 | 0.8197 | 0.6625 |
| 25    | 1.466  | 1.4379 | 1.3177 | 1.3063 | 1.3077 | 1.0504 | 1.2909 | 0.7934 | 1.1493 | 0.8306 | 0.667  |
| 25.25 | 1.4669 | 1.4431 | 1.3269 | 1.3133 | 1.3136 | 1.0629 | 1.303  | 0.8029 | 1.1575 | 0.8375 | 0.674  |
| 25.5  | 1.4687 | 1.4476 | 1.3358 | 1.3213 | 1.322  | 1.0716 | 1.3162 | 0.8104 | 1.1691 | 0.8469 | 0.6795 |
| 25.75 | 1.4687 | 1.4518 | 1.345  | 1.3291 | 1.3293 | 1.0814 | 1.3265 | 0.8193 | 1.1766 | 0.8553 | 0.6845 |
| 26    | 1.4682 | 1.453  | 1.3526 | 1.3291 | 1.3283 | 1.0831 | 1.3304 | 0.8193 | 1.1764 | 0.8526 | 0.6864 |
| 26.25 | 1.4704 | 1.4557 | 1.3577 | 1.335  | 1.3334 | 1.0919 | 1.3419 | 0.8273 | 1.1858 | 0.8596 | 0.6908 |
| 26.5  | 1.4702 | 1.4595 | 1.368  | 1.3397 | 1.3406 | 1.0995 | 1.3525 | 0.8361 | 1.1927 | 0.8677 | 0.6973 |
| 26.75 | 1.4706 | 1.4619 | 1.3756 | 1.3461 | 1.3464 | 1.1091 | 1.3635 | 0.8447 | 1.2014 | 0.8748 | 0.7038 |
| 27    | 1.4716 | 1.4639 | 1.3808 | 1.3511 | 1.355  | 1.1186 | 1.3758 | 0.8538 | 1.2115 | 0.8823 | 0.7079 |
| 27.25 | 1.4725 | 1.4677 | 1.3894 | 1.3569 | 1.3626 | 1.1297 | 1.3884 | 0.8634 | 1.2197 | 0.8893 | 0.7147 |
| 27.5  | 1.473  | 1.4709 | 1.396  | 1.3599 | 1.3687 | 1.1374 | 1.398  | 0.8733 | 1.2285 | 0.8981 | 0.7194 |
| 27.75 | 1.4747 | 1.4735 | 1.4025 | 1.3631 | 1.3746 | 1.1499 | 1.4096 | 0.8834 | 1.2356 | 0.9069 | 0.7242 |
| 28    | 1.4747 | 1.4758 | 1.4095 | 1.3664 | 1.3813 | 1.1602 | 1.4209 | 0.8932 | 1.2451 | 0.9125 | 0.729  |
| 28.25 | 1.4772 | 1.4784 | 1.4156 | 1.3688 | 1.3877 | 1.1709 | 1.4316 | 0.9034 | 1.2529 | 0.9226 | 0.7358 |
| 28.5  | 1.4758 | 1.4806 | 1.4201 | 1.3712 | 1.3927 | 1.1807 | 1.4427 | 0.9122 | 1.2618 | 0.9308 | 0.7425 |
| 28.75 | 1.4763 | 1.4813 | 1.4239 | 1.3712 | 1.3992 | 1.1903 | 1.4536 | 0.9229 | 1.27   | 0.9371 | 0.7484 |

|       |        |        |        |        |        |        |        |        |        |        |        |
|-------|--------|--------|--------|--------|--------|--------|--------|--------|--------|--------|--------|
| 29    | 1.4771 | 1.4829 | 1.4289 | 1.3739 | 1.4037 | 1.2013 | 1.4657 | 0.9334 | 1.2803 | 0.9474 | 0.7564 |
| 29.25 | 1.4786 | 1.485  | 1.4341 | 1.3744 | 1.4123 | 1.2098 | 1.4763 | 0.9419 | 1.2913 | 0.9551 | 0.7621 |
| 29.5  | 1.4803 | 1.4861 | 1.4367 | 1.3766 | 1.4115 | 1.2194 | 1.4857 | 0.953  | 1.2973 | 0.9625 | 0.7687 |
| 29.75 | 1.4807 | 1.4866 | 1.4387 | 1.377  | 1.4153 | 1.2275 | 1.4952 | 0.9611 | 1.3065 | 0.971  | 0.7748 |
| 30    | 1.4823 | 1.4892 | 1.4412 | 1.3786 | 1.4179 | 1.2373 | 1.5032 | 0.9724 | 1.3126 | 0.9792 | 0.7802 |
| 30.25 | 1.4831 | 1.49   | 1.4444 | 1.3739 | 1.4113 | 1.2364 | 1.4999 | 0.9722 | 1.3099 | 0.9756 | 0.7784 |
| 30.5  | 1.4829 | 1.4913 | 1.4444 | 1.3748 | 1.4131 | 1.2432 | 1.5063 | 0.978  | 1.3159 | 0.982  | 0.7825 |
| 30.75 | 1.4823 | 1.4923 | 1.4446 | 1.3756 | 1.4135 | 1.2502 | 1.5108 | 0.9871 | 1.3235 | 0.9895 | 0.7877 |
| 31    | 1.4825 | 1.4929 | 1.4466 | 1.3759 | 1.4168 | 1.2565 | 1.5156 | 0.9938 | 1.3316 | 0.9964 | 0.7931 |
| 31.25 | 1.4843 | 1.4939 | 1.448  | 1.377  | 1.4187 | 1.2655 | 1.5208 | 1.0028 | 1.3356 | 1.0021 | 0.7992 |
| 31.5  | 1.4842 | 1.496  | 1.4475 | 1.3795 | 1.4218 | 1.2739 | 1.5263 | 1.0121 | 1.345  | 1.0103 | 0.8026 |
| 31.75 | 1.4837 | 1.4956 | 1.4475 | 1.3793 | 1.4259 | 1.2811 | 1.5291 | 1.0209 | 1.352  | 1.0201 | 0.8085 |
| 32    | 1.4837 | 1.4964 | 1.4488 | 1.3815 | 1.4278 | 1.2902 | 1.5317 | 1.0295 | 1.3593 | 1.0262 | 0.8158 |
| 32.25 | 1.4847 | 1.4969 | 1.4483 | 1.3821 | 1.4313 | 1.2969 | 1.5352 | 1.0386 | 1.3669 | 1.0346 | 0.8233 |
| 32.5  | 1.4848 | 1.4964 | 1.448  | 1.384  | 1.435  | 1.3071 | 1.5378 | 1.0473 | 1.3732 | 1.0427 | 0.8284 |
| 32.75 | 1.4858 | 1.4974 | 1.448  | 1.3839 | 1.4358 | 1.3119 | 1.5388 | 1.0553 | 1.3763 | 1.0499 | 0.8326 |
| 33    | 1.4867 | 1.4992 | 1.4467 | 1.3859 | 1.439  | 1.3186 | 1.5408 | 1.0648 | 1.3824 | 1.0573 | 0.8361 |
| 33.25 | 1.4876 | 1.498  | 1.4476 | 1.3865 | 1.4404 | 1.3263 | 1.5421 | 1.072  | 1.3884 | 1.0641 | 0.8413 |
| 33.5  | 1.4885 | 1.4993 | 1.4481 | 1.3882 | 1.4413 | 1.3331 | 1.5439 | 1.0801 | 1.3938 | 1.0717 | 0.8469 |
| 33.75 | 1.4883 | 1.4994 | 1.4469 | 1.3873 | 1.4419 | 1.3398 | 1.5457 | 1.0898 | 1.3974 | 1.0771 | 0.8537 |
| 34    | 1.4888 | 1.4988 | 1.4474 | 1.3886 | 1.4439 | 1.345  | 1.5469 | 1.098  | 1.4021 | 1.0833 | 0.8569 |
| 34.25 | 1.4892 | 1.4995 | 1.4471 | 1.3886 | 1.447  | 1.349  | 1.5503 | 1.1049 | 1.4061 | 1.0916 | 0.8612 |
| 34.5  | 1.4899 | 1.4996 | 1.4474 | 1.3888 | 1.4466 | 1.3556 | 1.5511 | 1.1151 | 1.407  | 1.0985 | 0.8674 |
| 34.75 | 1.4919 | 1.5003 | 1.4472 | 1.3898 | 1.4475 | 1.3585 | 1.5536 | 1.1222 | 1.409  | 1.1068 | 0.8709 |
| 35    | 1.492  | 1.5014 | 1.4486 | 1.3893 | 1.4459 | 1.3631 | 1.5548 | 1.1312 | 1.4104 | 1.1123 | 0.8777 |
| 35.25 | 1.4922 | 1.502  | 1.4486 | 1.3904 | 1.4477 | 1.3644 | 1.5561 | 1.1395 | 1.4132 | 1.1182 | 0.8817 |
| 35.5  | 1.4933 | 1.5004 | 1.4477 | 1.3904 | 1.4468 | 1.3682 | 1.5579 | 1.1478 | 1.4135 | 1.1271 | 0.8848 |
| 35.75 | 1.4939 | 1.5019 | 1.4479 | 1.3913 | 1.4476 | 1.3712 | 1.5585 | 1.1538 | 1.4146 | 1.1329 | 0.889  |
| 36    | 1.4951 | 1.5018 | 1.4476 | 1.3909 | 1.4471 | 1.3736 | 1.5596 | 1.1631 | 1.4134 | 1.1385 | 0.8941 |
| 36.25 | 1.4965 | 1.5015 | 1.4469 | 1.3922 | 1.448  | 1.3752 | 1.5583 | 1.1704 | 1.4156 | 1.1457 | 0.8993 |
| 36.5  | 1.4976 | 1.5021 | 1.4473 | 1.3921 | 1.4483 | 1.3779 | 1.5601 | 1.1771 | 1.4156 | 1.1517 | 0.9032 |
| 36.75 | 1.4983 | 1.5037 | 1.4481 | 1.3899 | 1.4466 | 1.3782 | 1.558  | 1.1807 | 1.4128 | 1.1536 | 0.9033 |
| 37    | 1.4992 | 1.5034 | 1.4477 | 1.3869 | 1.4421 | 1.3754 | 1.5532 | 1.1833 | 1.4085 | 1.1561 | 0.904  |
| 37.25 | 1.4997 | 1.504  | 1.449  | 1.3873 | 1.4411 | 1.3756 | 1.5516 | 1.189  | 1.4069 | 1.1601 | 0.9078 |
| 37.5  | 1.5011 | 1.5037 | 1.4489 | 1.3872 | 1.4403 | 1.3771 | 1.5521 | 1.1952 | 1.4073 | 1.1661 | 0.9109 |
| 37.75 | 1.502  | 1.505  | 1.4486 | 1.3861 | 1.4414 | 1.3786 | 1.552  | 1.2018 | 1.4074 | 1.1703 | 0.9154 |
| 38    | 1.5029 | 1.5047 | 1.4475 | 1.387  | 1.4409 | 1.3793 | 1.5516 | 1.2098 | 1.4075 | 1.1761 | 0.92   |
| 38.25 | 1.5029 | 1.5046 | 1.449  | 1.3862 | 1.4392 | 1.3805 | 1.5521 | 1.217  | 1.4074 | 1.1842 | 0.9239 |
| 38.5  | 1.504  | 1.505  | 1.4481 | 1.3878 | 1.4391 | 1.382  | 1.5517 | 1.2251 | 1.4073 | 1.1899 | 0.929  |
| 38.75 | 1.5035 | 1.5042 | 1.448  | 1.3886 | 1.4433 | 1.3844 | 1.5533 | 1.2306 | 1.4092 | 1.1962 | 0.9332 |
| 39    | 1.5042 | 1.505  | 1.4488 | 1.3886 | 1.4413 | 1.3861 | 1.5543 | 1.2377 | 1.4107 | 1.2008 | 0.9381 |
| 39.25 | 1.5058 | 1.5049 | 1.4482 | 1.3889 | 1.4438 | 1.3877 | 1.5551 | 1.2443 | 1.4098 | 1.2063 | 0.9413 |



|       |        |        |        |        |        |        |        |        |        |        |        |
|-------|--------|--------|--------|--------|--------|--------|--------|--------|--------|--------|--------|
| 39.5  | 1.507  | 1.5052 | 1.4485 | 1.3897 | 1.4427 | 1.3886 | 1.5561 | 1.2514 | 1.4106 | 1.213  | 0.9462 |
| 39.75 | 1.5073 | 1.506  | 1.4484 | 1.389  | 1.4442 | 1.3902 | 1.557  | 1.2577 | 1.412  | 1.2215 | 0.9505 |
| 40    | 1.5077 | 1.5062 | 1.4489 | 1.3913 | 1.4435 | 1.3917 | 1.5579 | 1.2645 | 1.4127 | 1.2262 | 0.9564 |
| 40.25 | 1.5093 | 1.5063 | 1.4496 | 1.3914 | 1.4453 | 1.3918 | 1.5581 | 1.2711 | 1.4136 | 1.2312 | 0.9594 |
| 40.5  | 1.5096 | 1.506  | 1.4489 | 1.3922 | 1.445  | 1.392  | 1.5584 | 1.2767 | 1.4148 | 1.2374 | 0.9648 |
| 40.75 | 1.5108 | 1.5059 | 1.4494 | 1.3933 | 1.4438 | 1.3943 | 1.5581 | 1.2843 | 1.4126 | 1.244  | 0.9699 |
| 41    | 1.5129 | 1.5053 | 1.4485 | 1.3938 | 1.4453 | 1.3939 | 1.5582 | 1.2895 | 1.4142 | 1.2489 | 0.9722 |
| 41.25 | 1.5127 | 1.5048 | 1.4491 | 1.3929 | 1.4461 | 1.3948 | 1.5587 | 1.2949 | 1.414  | 1.2531 | 0.9759 |
| 41.5  | 1.513  | 1.5052 | 1.4495 | 1.3942 | 1.4457 | 1.3951 | 1.559  | 1.3001 | 1.4148 | 1.2574 | 0.9803 |
| 41.75 | 1.513  | 1.5045 | 1.4496 | 1.394  | 1.4464 | 1.3955 | 1.5598 | 1.3051 | 1.4131 | 1.2633 | 0.9843 |
| 42    | 1.5143 | 1.506  | 1.4492 | 1.3956 | 1.4461 | 1.396  | 1.559  | 1.3117 | 1.4145 | 1.2674 | 0.9893 |
| 42.25 | 1.5164 | 1.506  | 1.4512 | 1.3954 | 1.4472 | 1.3956 | 1.5595 | 1.3158 | 1.4156 | 1.2725 | 0.9927 |
| 42.5  | 1.5166 | 1.5062 | 1.4516 | 1.3943 | 1.4455 | 1.3965 | 1.5603 | 1.321  | 1.4141 | 1.2764 | 0.9979 |
| 42.75 | 1.518  | 1.506  | 1.4518 | 1.3956 | 1.4455 | 1.3957 | 1.5595 | 1.3237 | 1.4147 | 1.283  | 1.0015 |
| 43    | 1.5154 | 1.5053 | 1.4522 | 1.3952 | 1.4451 | 1.397  | 1.5616 | 1.3285 | 1.4155 | 1.2872 | 1.006  |
| 43.25 | 1.5129 | 1.5059 | 1.4522 | 1.3944 | 1.4463 | 1.3954 | 1.5603 | 1.3302 | 1.415  | 1.2894 | 1.0097 |
| 43.5  | 1.5111 | 1.5064 | 1.4527 | 1.3946 | 1.4459 | 1.3964 | 1.5613 | 1.3311 | 1.4152 | 1.2934 | 1.0143 |
| 43.75 | 1.5114 | 1.5084 | 1.453  | 1.3947 | 1.4466 | 1.3965 | 1.5622 | 1.3351 | 1.4148 | 1.297  | 1.0182 |
| 44    | 1.5125 | 1.5078 | 1.4529 | 1.3944 | 1.4478 | 1.3963 | 1.5627 | 1.3355 | 1.4156 | 1.2994 | 1.0226 |
| 44.25 | 1.5102 | 1.5073 | 1.4529 | 1.3967 | 1.4458 | 1.396  | 1.5617 | 1.3361 | 1.4157 | 1.3037 | 1.026  |
| 44.5  | 1.5105 | 1.5065 | 1.4523 | 1.3954 | 1.4457 | 1.395  | 1.5634 | 1.3373 | 1.4166 | 1.3049 | 1.0292 |
| 44.75 | 1.5104 | 1.5065 | 1.454  | 1.3959 | 1.4496 | 1.3964 | 1.5636 | 1.3378 | 1.4176 | 1.3074 | 1.035  |
| 45    | 1.5092 | 1.5064 | 1.4543 | 1.3957 | 1.4478 | 1.395  | 1.5632 | 1.3378 | 1.4169 | 1.3097 | 1.0392 |
| 45.25 | 1.5105 | 1.5057 | 1.4541 | 1.396  | 1.4492 | 1.3956 | 1.5645 | 1.3369 | 1.4153 | 1.3131 | 1.0426 |
| 45.5  | 1.5103 | 1.5065 | 1.4557 | 1.3955 | 1.4502 | 1.3949 | 1.5642 | 1.3373 | 1.4187 | 1.3141 | 1.046  |
| 45.75 | 1.51   | 1.5067 | 1.4559 | 1.3968 | 1.4482 | 1.3955 | 1.5644 | 1.3373 | 1.4181 | 1.3153 | 1.049  |
| 46    | 1.5108 | 1.5061 | 1.4561 | 1.3976 | 1.4485 | 1.3967 | 1.5648 | 1.3378 | 1.4181 | 1.3151 | 1.0543 |
| 46.25 | 1.5109 | 1.5064 | 1.456  | 1.3965 | 1.4475 | 1.3974 | 1.5644 | 1.3374 | 1.4181 | 1.3171 | 1.0583 |
| 46.5  | 1.511  | 1.5069 | 1.4571 | 1.399  | 1.4493 | 1.397  | 1.566  | 1.3367 | 1.4179 | 1.3178 | 1.0614 |
| 46.75 | 1.511  | 1.5052 | 1.4577 | 1.3985 | 1.4476 | 1.3963 | 1.5641 | 1.3378 | 1.4177 | 1.3189 | 1.0662 |
| 47    | 1.5111 | 1.5059 | 1.4574 | 1.3996 | 1.4473 | 1.3963 | 1.5662 | 1.3384 | 1.419  | 1.3188 | 1.0701 |
| 47.25 | 1.5102 | 1.5042 | 1.4571 | 1.3971 | 1.448  | 1.3964 | 1.5657 | 1.337  | 1.419  | 1.3213 | 1.0736 |
| 47.5  | 1.5112 | 1.5044 | 1.4583 | 1.3969 | 1.4466 | 1.3963 | 1.5656 | 1.3375 | 1.4186 | 1.3205 | 1.0791 |
| 47.75 | 1.5109 | 1.5036 | 1.4575 | 1.3971 | 1.4469 | 1.397  | 1.5654 | 1.3383 | 1.4195 | 1.3219 | 1.0809 |
| 48    | 1.511  | 1.5046 | 1.4582 | 1.3966 | 1.4472 | 1.3972 | 1.5656 | 1.3379 | 1.4183 | 1.3218 | 1.0851 |
| 48.25 | 1.511  | 1.5042 | 1.4587 | 1.3973 | 1.4462 | 1.3963 | 1.5655 | 1.3393 | 1.4191 | 1.3229 | 1.0895 |
| 48.5  | 1.5111 | 1.504  | 1.4592 | 1.396  | 1.4471 | 1.3953 | 1.5667 | 1.3393 | 1.4192 | 1.3246 | 1.0916 |
| 48.75 | 1.5107 | 1.5019 | 1.4578 | 1.3974 | 1.4467 | 1.396  | 1.5665 | 1.3381 | 1.4176 | 1.3248 | 1.0959 |
| 49    | 1.5112 | 1.5026 | 1.4586 | 1.3966 | 1.4473 | 1.3962 | 1.5676 | 1.3389 | 1.4202 | 1.3256 | 1.0987 |
| 49.25 | 1.5109 | 1.5034 | 1.4604 | 1.3967 | 1.4461 | 1.3951 | 1.5659 | 1.3395 | 1.4186 | 1.3248 | 1.1013 |
| 49.5  | 1.5094 | 1.504  | 1.4603 | 1.3971 | 1.4455 | 1.3963 | 1.566  | 1.3393 | 1.4186 | 1.3252 | 1.1065 |
| 49.75 | 1.5105 | 1.5038 | 1.4602 | 1.3975 | 1.4477 | 1.3957 | 1.5672 | 1.34   | 1.4196 | 1.3264 | 1.11   |

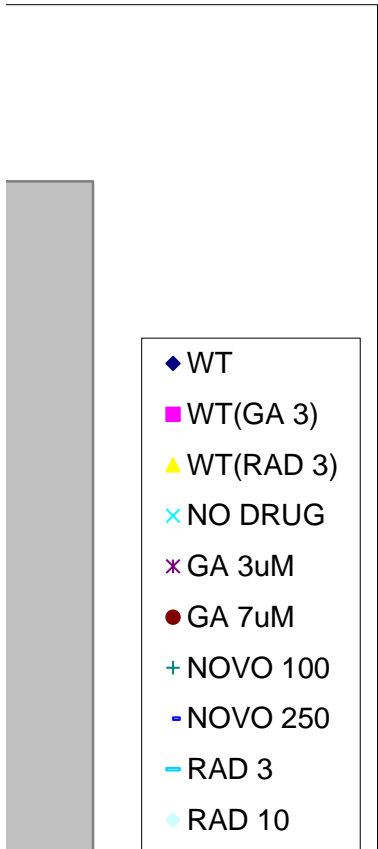

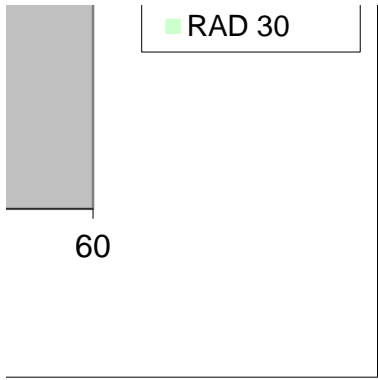

**F17 F18 F19 F20 F21 F22 F23 F24**

| <b>TIME</b> | <b>WT</b> | <b>WT(GA 3)</b> | <b>WT(RAD 3)</b> | <b>NO DRUG</b> | <b>GA 3uM</b> | <b>GA 7uM</b> | <b>NOVO 100</b> | <b>NOVO 250</b> | <b>RAD 3</b> | <b>RAD 10</b> | <b>RAD 30</b> |
|-------------|-----------|-----------------|------------------|----------------|---------------|---------------|-----------------|-----------------|--------------|---------------|---------------|
| 0           | 0.1894    | 0.2051          | 0.1892           | 0.1925         | 0.1787        | 0.1828        | 0.277           | 1.7455          | 0.1883       | 0.1763        | 0.1902        |
| 0.25        | 0.1844    | 0.1929          | 0.1812           | 0.1892         | 0.1733        | 0.1728        | 0.2726          | 1.5619          | 0.1803       | 0.1694        | 0.1811        |
| 0.5         | 0.1833    | 0.1912          | 0.1787           | 0.184          | 0.1743        | 0.1704        | 0.2682          | 1.4267          | 0.1789       | 0.1663        | 0.1799        |
| 0.75        | 0.1838    | 0.189           | 0.1758           | 0.1829         | 0.1737        | 0.1682        | 0.2618          | 1.4105          | 0.1776       | 0.1657        | 0.1807        |
| 1           | 0.1843    | 0.1877          | 0.1818           | 0.1842         | 0.1744        | 0.1694        | 0.2544          | 1.2054          | 0.1773       | 0.1658        | 0.1816        |
| 1.25        | 0.1867    | 0.1862          | 0.1836           | 0.1852         | 0.1752        | 0.1698        | 0.2501          | 0.9345          | 0.1788       | 0.1661        | 0.1819        |
| 1.5         | 0.188     | 0.186           | 0.1823           | 0.1852         | 0.1767        | 0.1701        | 0.2465          | 1.1181          | 0.1795       | 0.1667        | 0.181         |
| 1.75        | 0.1903    | 0.1872          | 0.1822           | 0.1872         | 0.1783        | 0.1713        | 0.2416          | 0.5818          | 0.1804       | 0.1647        | 0.1807        |

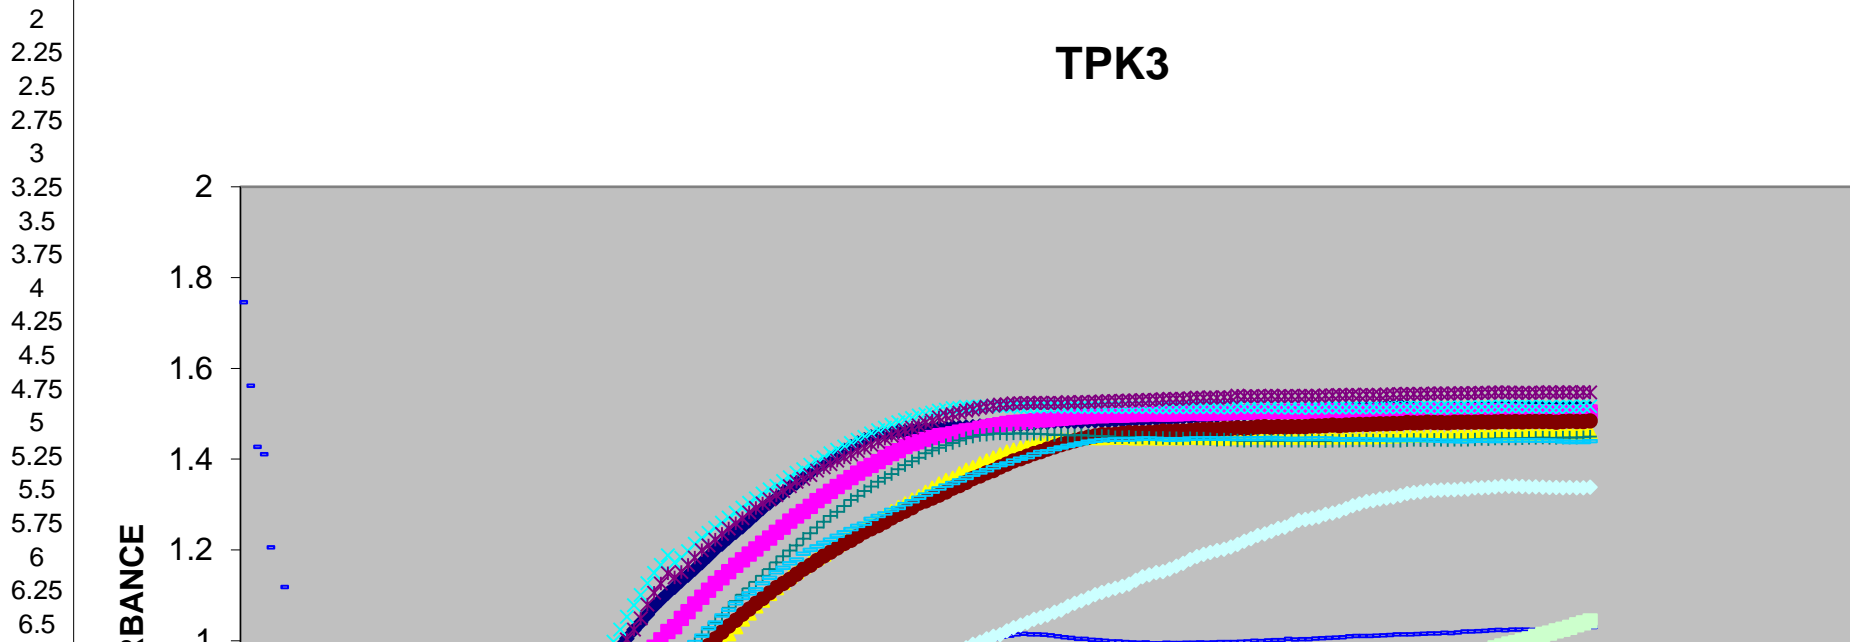

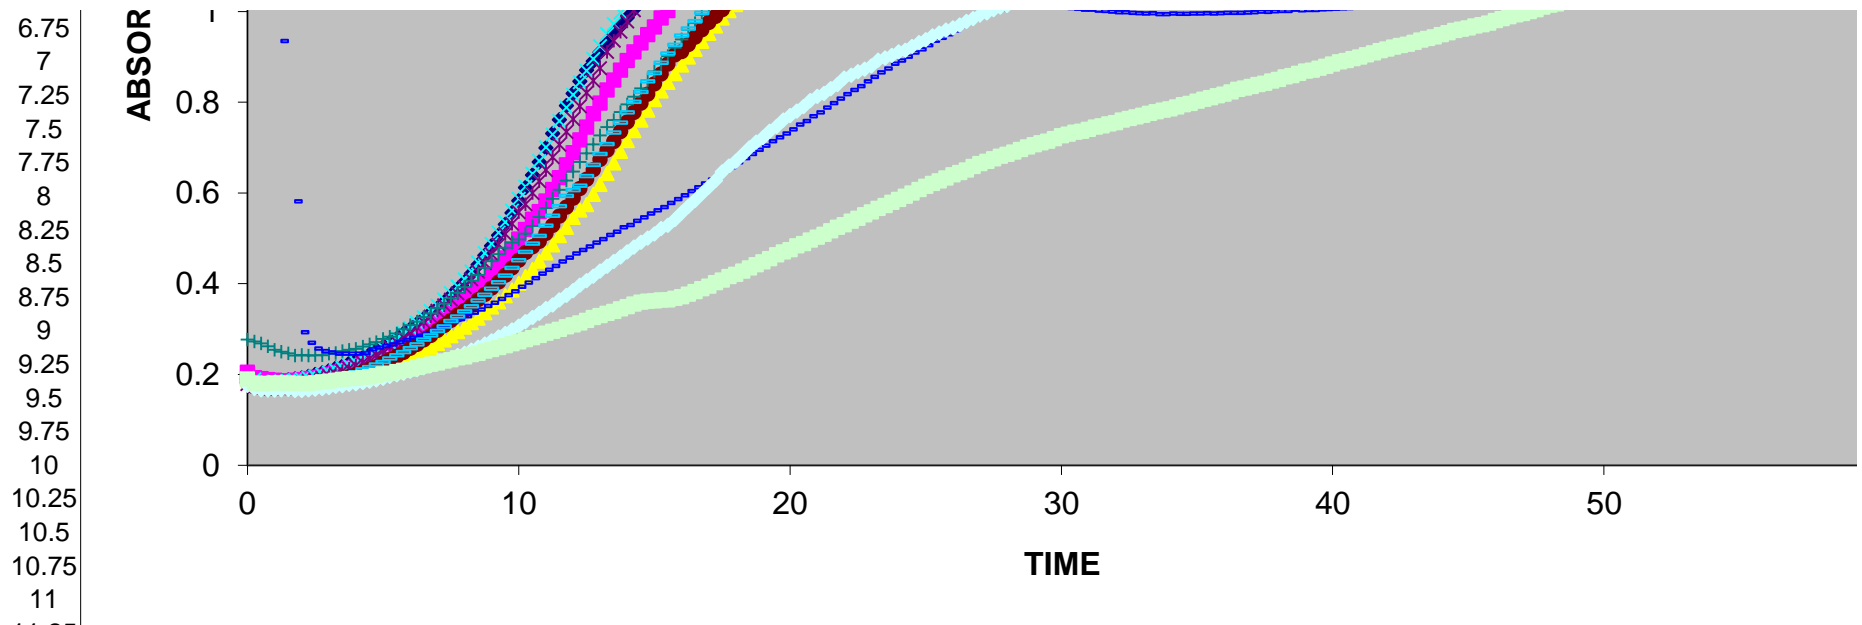

|       |        |        |        |        |        |        |        |        |        |        |        |
|-------|--------|--------|--------|--------|--------|--------|--------|--------|--------|--------|--------|
| 11.25 | 0.7307 | 0.6075 | 0.4837 | 0.7288 | 0.6788 | 0.5288 | 0.5889 | 0.4391 | 0.5493 | 0.3534 | 0.2933 |
| 11.5  | 0.7614 | 0.6339 | 0.5059 | 0.7584 | 0.706  | 0.5494 | 0.6068 | 0.4489 | 0.5711 | 0.3641 | 0.2998 |
| 11.75 | 0.7927 | 0.6618 | 0.5242 | 0.788  | 0.7347 | 0.569  | 0.6273 | 0.4576 | 0.5936 | 0.3746 | 0.3053 |
| 12    | 0.8194 | 0.6889 | 0.5464 | 0.8161 | 0.763  | 0.5886 | 0.6469 | 0.4664 | 0.606  | 0.3848 | 0.3095 |
| 12.25 | 0.8459 | 0.7168 | 0.5622 | 0.8436 | 0.7913 | 0.6094 | 0.668  | 0.4742 | 0.6161 | 0.3965 | 0.3138 |
| 12.5  | 0.8706 | 0.7448 | 0.5743 | 0.869  | 0.8204 | 0.63   | 0.6876 | 0.482  | 0.6369 | 0.407  | 0.3195 |
| 12.75 | 0.8904 | 0.7744 | 0.5968 | 0.8951 | 0.8474 | 0.6516 | 0.7072 | 0.4907 | 0.6619 | 0.4169 | 0.3253 |
| 13    | 0.9099 | 0.7982 | 0.6186 | 0.9235 | 0.8751 | 0.6738 | 0.7271 | 0.4982 | 0.6856 | 0.4277 | 0.3297 |
| 13.25 | 0.9301 | 0.8269 | 0.6426 | 0.9502 | 0.911  | 0.6945 | 0.7448 | 0.5072 | 0.7079 | 0.4381 | 0.335  |
| 13.5  | 0.9508 | 0.849  | 0.6665 | 0.9719 | 0.9358 | 0.7136 | 0.7609 | 0.5146 | 0.7329 | 0.4489 | 0.3392 |
| 13.75 | 0.9679 | 0.8707 | 0.6913 | 0.9972 | 0.9553 | 0.735  | 0.7781 | 0.5244 | 0.7551 | 0.4591 | 0.3444 |
| 14    | 0.986  | 0.8918 | 0.7152 | 1.0244 | 0.9778 | 0.7563 | 0.795  | 0.5293 | 0.7775 | 0.4698 | 0.3496 |
| 14.25 | 1.0047 | 0.9106 | 0.7372 | 1.0522 | 1.0028 | 0.7778 | 0.8124 | 0.5388 | 0.801  | 0.4809 | 0.3551 |
| 14.5  | 1.0233 | 0.9308 | 0.7608 | 1.0779 | 1.0243 | 0.7979 | 0.8303 | 0.5461 | 0.8225 | 0.491  | 0.3593 |
| 14.75 | 1.0397 | 0.9491 | 0.7825 | 1.1007 | 1.049  | 0.8178 | 0.8487 | 0.5549 | 0.8461 | 0.5007 | 0.3613 |
| 15    | 1.0577 | 0.966  | 0.8057 | 1.1263 | 1.0791 | 0.8402 | 0.8681 | 0.5616 | 0.8643 | 0.5095 | 0.362  |
| 15.25 | 1.0753 | 0.9853 | 0.8251 | 1.1489 | 1.1051 | 0.8622 | 0.8837 | 0.5692 | 0.8869 | 0.5213 | 0.3644 |
| 15.5  | 1.0897 | 1.0015 | 0.8439 | 1.1669 | 1.1262 | 0.8843 | 0.9014 | 0.578  | 0.9071 | 0.5288 | 0.3647 |
| 15.75 | 1.1049 | 1.0198 | 0.8628 | 1.1876 | 1.1484 | 0.9047 | 0.9199 | 0.5868 | 0.9266 | 0.5415 | 0.3677 |
| 16    | 1.1171 | 1.031  | 0.8817 | 1.1725 | 1.1394 | 0.9115 | 0.9383 | 0.5951 | 0.9468 | 0.5561 | 0.3713 |
| 16.25 | 1.1316 | 1.0487 | 0.8996 | 1.1824 | 1.1513 | 0.9267 | 0.9595 | 0.6042 | 0.9625 | 0.5702 | 0.3773 |
| 16.5  | 1.1443 | 1.0637 | 0.9165 | 1.197  | 1.1666 | 0.943  | 0.9742 | 0.6126 | 0.9788 | 0.5837 | 0.3826 |
| 16.75 | 1.1579 | 1.0806 | 0.9342 | 1.2134 | 1.183  | 0.9595 | 0.9926 | 0.6207 | 0.997  | 0.5988 | 0.389  |
| 17    | 1.1715 | 1.0952 | 0.9517 | 1.2259 | 1.1989 | 0.976  | 1.0101 | 0.6298 | 1.0111 | 0.6131 | 0.3949 |

|       |        |        |        |        |        |        |        |        |        |        |        |
|-------|--------|--------|--------|--------|--------|--------|--------|--------|--------|--------|--------|
| 17.25 | 1.1858 | 1.1114 | 0.9682 | 1.2373 | 1.21   | 0.9889 | 1.0258 | 0.6376 | 1.0272 | 0.6274 | 0.4027 |
| 17.5  | 1.2004 | 1.1256 | 0.9855 | 1.2489 | 1.2226 | 1.0036 | 1.0408 | 0.647  | 1.0402 | 0.6464 | 0.4081 |
| 17.75 | 1.2123 | 1.1388 | 1.0016 | 1.2595 | 1.2355 | 1.0189 | 1.0568 | 0.6568 | 1.0553 | 0.6588 | 0.4155 |
| 18    | 1.2261 | 1.1522 | 1.015  | 1.2709 | 1.2473 | 1.0318 | 1.0725 | 0.6674 | 1.0679 | 0.6694 | 0.4211 |
| 18.25 | 1.239  | 1.1664 | 1.0307 | 1.282  | 1.2583 | 1.045  | 1.087  | 0.6764 | 1.0823 | 0.6842 | 0.4278 |
| 18.5  | 1.251  | 1.1779 | 1.0478 | 1.2931 | 1.2698 | 1.0583 | 1.1011 | 0.6862 | 1.0939 | 0.6996 | 0.4351 |
| 18.75 | 1.2641 | 1.1907 | 1.0607 | 1.3038 | 1.2822 | 1.0697 | 1.1154 | 0.6953 | 1.1038 | 0.7122 | 0.4417 |
| 19    | 1.2773 | 1.2018 | 1.0765 | 1.3137 | 1.2924 | 1.0821 | 1.1294 | 0.7044 | 1.1133 | 0.722  | 0.4483 |
| 19.25 | 1.2907 | 1.2145 | 1.0891 | 1.324  | 1.3021 | 1.0926 | 1.1431 | 0.7139 | 1.1265 | 0.7357 | 0.4556 |
| 19.5  | 1.3032 | 1.2259 | 1.1041 | 1.3329 | 1.3115 | 1.1055 | 1.1579 | 0.7223 | 1.1383 | 0.7467 | 0.464  |
| 19.75 | 1.3141 | 1.239  | 1.1166 | 1.341  | 1.3208 | 1.1164 | 1.1726 | 0.7311 | 1.1504 | 0.7605 | 0.4703 |
| 20    | 1.3251 | 1.2497 | 1.1283 | 1.3516 | 1.3297 | 1.1256 | 1.1856 | 0.7404 | 1.1606 | 0.7703 | 0.4753 |
| 20.25 | 1.3374 | 1.2637 | 1.1419 | 1.3602 | 1.34   | 1.1353 | 1.1985 | 0.7507 | 1.1702 | 0.7804 | 0.4836 |
| 20.5  | 1.3474 | 1.2743 | 1.1521 | 1.3698 | 1.35   | 1.1466 | 1.21   | 0.7585 | 1.1791 | 0.7905 | 0.4886 |
| 20.75 | 1.3589 | 1.2848 | 1.1637 | 1.3774 | 1.3566 | 1.1574 | 1.2249 | 0.7693 | 1.1917 | 0.8035 | 0.4963 |
| 21    | 1.3704 | 1.2956 | 1.1744 | 1.3873 | 1.365  | 1.1659 | 1.2367 | 0.7778 | 1.1997 | 0.8125 | 0.5025 |
| 21.25 | 1.3806 | 1.3083 | 1.1829 | 1.3945 | 1.3746 | 1.1767 | 1.2492 | 0.7884 | 1.2076 | 0.8195 | 0.5092 |
| 21.5  | 1.39   | 1.3184 | 1.1906 | 1.4038 | 1.3819 | 1.1866 | 1.262  | 0.7978 | 1.2151 | 0.8296 | 0.5166 |
| 21.75 | 1.3999 | 1.3289 | 1.2037 | 1.4128 | 1.3887 | 1.1952 | 1.2743 | 0.8076 | 1.2225 | 0.839  | 0.5243 |
| 22    | 1.4093 | 1.3395 | 1.2116 | 1.4207 | 1.3965 | 1.2041 | 1.284  | 0.8174 | 1.2308 | 0.8528 | 0.5301 |
| 22.25 | 1.4189 | 1.3493 | 1.2223 | 1.4277 | 1.4038 | 1.2142 | 1.2964 | 0.8269 | 1.2388 | 0.8597 | 0.5381 |
| 22.5  | 1.4278 | 1.3589 | 1.2316 | 1.4356 | 1.4103 | 1.221  | 1.3096 | 0.8356 | 1.2454 | 0.8669 | 0.5444 |
| 22.75 | 1.4356 | 1.369  | 1.2391 | 1.4423 | 1.4178 | 1.2302 | 1.319  | 0.8456 | 1.2529 | 0.8726 | 0.5517 |
| 23    | 1.4425 | 1.3781 | 1.2485 | 1.449  | 1.4251 | 1.2391 | 1.3297 | 0.8555 | 1.2579 | 0.8799 | 0.5586 |
| 23.25 | 1.4488 | 1.3861 | 1.257  | 1.4566 | 1.4321 | 1.2466 | 1.3397 | 0.8658 | 1.268  | 0.8926 | 0.566  |
| 23.5  | 1.4527 | 1.3947 | 1.2667 | 1.4633 | 1.4385 | 1.2536 | 1.3502 | 0.8741 | 1.2743 | 0.8976 | 0.5722 |
| 23.75 | 1.4559 | 1.4037 | 1.2752 | 1.469  | 1.4453 | 1.2612 | 1.3588 | 0.8845 | 1.2802 | 0.9028 | 0.5793 |
| 24    | 1.4583 | 1.4119 | 1.2845 | 1.4757 | 1.4514 | 1.2707 | 1.3673 | 0.8917 | 1.2877 | 0.9106 | 0.5856 |
| 24.25 | 1.4609 | 1.4188 | 1.2937 | 1.4812 | 1.457  | 1.2782 | 1.3778 | 0.9003 | 1.2925 | 0.9145 | 0.593  |
| 24.5  | 1.4615 | 1.4276 | 1.3014 | 1.4861 | 1.4635 | 1.2854 | 1.3868 | 0.9093 | 1.3005 | 0.9228 | 0.6001 |
| 24.75 | 1.4635 | 1.4341 | 1.3101 | 1.4902 | 1.4695 | 1.2933 | 1.3953 | 0.9165 | 1.3073 | 0.9313 | 0.6079 |
| 25    | 1.466  | 1.4379 | 1.3177 | 1.496  | 1.474  | 1.3025 | 1.4032 | 0.9256 | 1.3147 | 0.9375 | 0.6149 |
| 25.25 | 1.4669 | 1.4431 | 1.3269 | 1.4991 | 1.4806 | 1.3077 | 1.4125 | 0.9355 | 1.3221 | 0.946  | 0.6207 |
| 25.5  | 1.4687 | 1.4476 | 1.3358 | 1.5023 | 1.4845 | 1.3138 | 1.4192 | 0.9416 | 1.3285 | 0.9526 | 0.6268 |
| 25.75 | 1.4687 | 1.4518 | 1.345  | 1.5069 | 1.4916 | 1.3208 | 1.425  | 0.9497 | 1.3351 | 0.9585 | 0.6332 |
| 26    | 1.4682 | 1.453  | 1.3526 | 1.5088 | 1.4959 | 1.3276 | 1.4305 | 0.9584 | 1.3415 | 0.9639 | 0.6398 |
| 26.25 | 1.4704 | 1.4557 | 1.3577 | 1.5121 | 1.4986 | 1.3363 | 1.4354 | 0.9676 | 1.347  | 0.9701 | 0.6451 |
| 26.5  | 1.4702 | 1.4595 | 1.368  | 1.5121 | 1.5023 | 1.3417 | 1.441  | 0.9762 | 1.3531 | 0.9777 | 0.6505 |
| 26.75 | 1.4706 | 1.4619 | 1.3756 | 1.5148 | 1.5068 | 1.3485 | 1.4458 | 0.9821 | 1.3588 | 0.9844 | 0.6583 |
| 27    | 1.4716 | 1.4639 | 1.3808 | 1.5154 | 1.5096 | 1.3574 | 1.4497 | 0.9903 | 1.3654 | 0.9917 | 0.6648 |
| 27.25 | 1.4725 | 1.4677 | 1.3894 | 1.5155 | 1.5127 | 1.3627 | 1.4527 | 0.9965 | 1.3704 | 0.9969 | 0.6699 |
| 27.5  | 1.473  | 1.4709 | 1.396  | 1.5163 | 1.515  | 1.3695 | 1.4539 | 1.002  | 1.3753 | 1.004  | 0.6755 |

|       |        |        |        |        |        |        |        |        |        |        |        |
|-------|--------|--------|--------|--------|--------|--------|--------|--------|--------|--------|--------|
| 27.75 | 1.4747 | 1.4735 | 1.4025 | 1.517  | 1.5177 | 1.3745 | 1.4559 | 1.0056 | 1.382  | 1.0095 | 0.6807 |
| 28    | 1.4747 | 1.4758 | 1.4095 | 1.5165 | 1.5198 | 1.3825 | 1.4563 | 1.0086 | 1.3864 | 1.0128 | 0.6853 |
| 28.25 | 1.4772 | 1.4784 | 1.4156 | 1.5175 | 1.5204 | 1.3891 | 1.4554 | 1.0112 | 1.3902 | 1.0213 | 0.6898 |
| 28.5  | 1.4758 | 1.4806 | 1.4201 | 1.5163 | 1.5225 | 1.3956 | 1.4568 | 1.0139 | 1.3969 | 1.0286 | 0.6958 |
| 28.75 | 1.4763 | 1.4813 | 1.4239 | 1.5154 | 1.5227 | 1.4008 | 1.4567 | 1.0151 | 1.4005 | 1.034  | 0.7014 |
| 29    | 1.4771 | 1.4829 | 1.4289 | 1.5151 | 1.5237 | 1.4068 | 1.4561 | 1.014  | 1.4044 | 1.0399 | 0.7061 |
| 29.25 | 1.4786 | 1.485  | 1.4341 | 1.5155 | 1.5233 | 1.4121 | 1.4557 | 1.0141 | 1.4103 | 1.0468 | 0.7105 |
| 29.5  | 1.4803 | 1.4861 | 1.4367 | 1.5158 | 1.5241 | 1.4167 | 1.4549 | 1.0131 | 1.4159 | 1.051  | 0.7139 |
| 29.75 | 1.4807 | 1.4866 | 1.4387 | 1.516  | 1.5235 | 1.4223 | 1.4542 | 1.0118 | 1.4172 | 1.0564 | 0.72   |
| 30    | 1.4823 | 1.4892 | 1.4412 | 1.5165 | 1.5235 | 1.4269 | 1.4533 | 1.0098 | 1.4217 | 1.0625 | 0.726  |
| 30.25 | 1.4831 | 1.49   | 1.4444 | 1.516  | 1.5238 | 1.4316 | 1.4535 | 1.0076 | 1.4256 | 1.0677 | 0.7298 |
| 30.5  | 1.4829 | 1.4913 | 1.4444 | 1.5154 | 1.5254 | 1.4359 | 1.4523 | 1.0063 | 1.4288 | 1.0759 | 0.7339 |
| 30.75 | 1.4823 | 1.4923 | 1.4446 | 1.5156 | 1.5245 | 1.4404 | 1.4524 | 1.0042 | 1.432  | 1.0823 | 0.736  |
| 31    | 1.4825 | 1.4929 | 1.4466 | 1.5151 | 1.526  | 1.4445 | 1.4529 | 1.0036 | 1.4347 | 1.0881 | 0.7404 |
| 31.25 | 1.4843 | 1.4939 | 1.448  | 1.5149 | 1.5255 | 1.4479 | 1.4516 | 1.0016 | 1.4385 | 1.0941 | 0.7454 |
| 31.5  | 1.4842 | 1.496  | 1.4475 | 1.5149 | 1.5266 | 1.4509 | 1.4508 | 1.0009 | 1.4404 | 1.1009 | 0.7482 |
| 31.75 | 1.4837 | 1.4956 | 1.4475 | 1.5152 | 1.5269 | 1.4537 | 1.4507 | 0.9996 | 1.4418 | 1.106  | 0.7521 |
| 32    | 1.4837 | 1.4964 | 1.4488 | 1.5149 | 1.5278 | 1.4537 | 1.4501 | 0.9982 | 1.4428 | 1.1112 | 0.7549 |
| 32.25 | 1.4847 | 1.4969 | 1.4483 | 1.5149 | 1.528  | 1.4546 | 1.4484 | 0.9985 | 1.4433 | 1.115  | 0.7604 |
| 32.5  | 1.4848 | 1.4964 | 1.448  | 1.515  | 1.5282 | 1.4567 | 1.4478 | 0.9971 | 1.4429 | 1.1196 | 0.7639 |
| 32.75 | 1.4858 | 1.4974 | 1.448  | 1.5152 | 1.5289 | 1.4577 | 1.4486 | 0.9964 | 1.4435 | 1.1247 | 0.7678 |
| 33    | 1.4867 | 1.4992 | 1.4467 | 1.515  | 1.5294 | 1.458  | 1.4474 | 0.9953 | 1.4438 | 1.1328 | 0.771  |
| 33.25 | 1.4876 | 1.498  | 1.4476 | 1.5155 | 1.5301 | 1.4581 | 1.4473 | 0.9962 | 1.4454 | 1.1406 | 0.7753 |
| 33.5  | 1.4885 | 1.4993 | 1.4481 | 1.5154 | 1.5305 | 1.4586 | 1.4465 | 0.9941 | 1.4453 | 1.1452 | 0.7787 |
| 33.75 | 1.4883 | 1.4994 | 1.4469 | 1.5142 | 1.5305 | 1.4594 | 1.4461 | 0.9943 | 1.4446 | 1.1496 | 0.7823 |
| 34    | 1.4888 | 1.4988 | 1.4474 | 1.5138 | 1.5321 | 1.4612 | 1.447  | 0.9954 | 1.4437 | 1.1523 | 0.7854 |
| 34.25 | 1.4892 | 1.4995 | 1.4471 | 1.5144 | 1.5326 | 1.4608 | 1.4458 | 0.9945 | 1.4427 | 1.1578 | 0.7898 |
| 34.5  | 1.4899 | 1.4996 | 1.4474 | 1.5146 | 1.5327 | 1.4613 | 1.4458 | 0.9949 | 1.444  | 1.164  | 0.7946 |
| 34.75 | 1.4919 | 1.5003 | 1.4472 | 1.5141 | 1.5328 | 1.4614 | 1.4454 | 0.9951 | 1.4434 | 1.1701 | 0.7974 |
| 35    | 1.492  | 1.5014 | 1.4486 | 1.5145 | 1.5342 | 1.4629 | 1.4462 | 0.9951 | 1.445  | 1.1784 | 0.8021 |
| 35.25 | 1.4922 | 1.502  | 1.4486 | 1.5143 | 1.5352 | 1.4644 | 1.4451 | 0.9961 | 1.4451 | 1.1848 | 0.8065 |
| 35.5  | 1.4933 | 1.5004 | 1.4477 | 1.5145 | 1.5347 | 1.4648 | 1.445  | 0.9956 | 1.445  | 1.1903 | 0.81   |
| 35.75 | 1.4939 | 1.5019 | 1.4479 | 1.5153 | 1.5359 | 1.4658 | 1.4442 | 0.996  | 1.4457 | 1.1945 | 0.8144 |
| 36    | 1.4951 | 1.5018 | 1.4476 | 1.5147 | 1.535  | 1.4653 | 1.4426 | 0.9966 | 1.445  | 1.1983 | 0.8175 |
| 36.25 | 1.4965 | 1.5015 | 1.4469 | 1.5139 | 1.5364 | 1.4669 | 1.4432 | 0.997  | 1.4444 | 1.2014 | 0.8224 |
| 36.5  | 1.4976 | 1.5021 | 1.4473 | 1.5138 | 1.5361 | 1.4669 | 1.4422 | 0.997  | 1.4452 | 1.2063 | 0.8281 |
| 36.75 | 1.4983 | 1.5037 | 1.4481 | 1.5161 | 1.5397 | 1.4688 | 1.441  | 0.9975 | 1.4443 | 1.2121 | 0.8313 |
| 37    | 1.4992 | 1.5034 | 1.4477 | 1.5154 | 1.538  | 1.4679 | 1.4405 | 0.9985 | 1.4449 | 1.2189 | 0.8346 |
| 37.25 | 1.4997 | 1.504  | 1.449  | 1.5147 | 1.538  | 1.4684 | 1.441  | 1      | 1.4461 | 1.2245 | 0.8388 |
| 37.5  | 1.5011 | 1.5037 | 1.4489 | 1.5142 | 1.5385 | 1.4708 | 1.4402 | 0.9992 | 1.4448 | 1.2316 | 0.8415 |
| 37.75 | 1.502  | 1.505  | 1.4486 | 1.515  | 1.5392 | 1.4712 | 1.4403 | 1.0001 | 1.446  | 1.235  | 0.8469 |
| 38    | 1.5029 | 1.5047 | 1.4475 | 1.5147 | 1.5399 | 1.4696 | 1.4401 | 1.0013 | 1.4464 | 1.2409 | 0.8505 |

|       |        |        |        |        |        |        |        |        |        |        |        |
|-------|--------|--------|--------|--------|--------|--------|--------|--------|--------|--------|--------|
| 38.25 | 1.5029 | 1.5046 | 1.449  | 1.514  | 1.5386 | 1.4714 | 1.4401 | 1.001  | 1.4453 | 1.247  | 0.8555 |
| 38.5  | 1.504  | 1.505  | 1.4481 | 1.5136 | 1.5389 | 1.4708 | 1.441  | 1.0037 | 1.4444 | 1.2497 | 0.8586 |
| 38.75 | 1.5035 | 1.5042 | 1.448  | 1.5134 | 1.5393 | 1.4715 | 1.4401 | 1.0027 | 1.4442 | 1.2568 | 0.8639 |
| 39    | 1.5042 | 1.505  | 1.4488 | 1.5133 | 1.5392 | 1.4713 | 1.4405 | 1.0032 | 1.4443 | 1.2646 | 0.8688 |
| 39.25 | 1.5058 | 1.5049 | 1.4482 | 1.5135 | 1.54   | 1.4716 | 1.44   | 1.0029 | 1.4448 | 1.2668 | 0.8708 |
| 39.5  | 1.507  | 1.5052 | 1.4485 | 1.5132 | 1.5393 | 1.4726 | 1.4411 | 1.0048 | 1.4451 | 1.2694 | 0.8749 |
| 39.75 | 1.5073 | 1.506  | 1.4484 | 1.5129 | 1.5388 | 1.4726 | 1.4399 | 1.0051 | 1.4452 | 1.2725 | 0.8789 |
| 40    | 1.5077 | 1.5062 | 1.4489 | 1.5142 | 1.5406 | 1.4734 | 1.4399 | 1.0062 | 1.4452 | 1.278  | 0.8843 |
| 40.25 | 1.5093 | 1.5063 | 1.4496 | 1.5145 | 1.5407 | 1.4746 | 1.4406 | 1.0069 | 1.4444 | 1.2812 | 0.8892 |
| 40.5  | 1.5096 | 1.506  | 1.4489 | 1.5138 | 1.541  | 1.4738 | 1.4401 | 1.0075 | 1.4432 | 1.2851 | 0.8921 |
| 40.75 | 1.5108 | 1.5059 | 1.4494 | 1.5134 | 1.5409 | 1.4748 | 1.4406 | 1.0093 | 1.4433 | 1.2911 | 0.8963 |
| 41    | 1.5129 | 1.5053 | 1.4485 | 1.5141 | 1.5418 | 1.4758 | 1.4413 | 1.0105 | 1.4442 | 1.2972 | 0.8995 |
| 41.25 | 1.5127 | 1.5048 | 1.4491 | 1.5138 | 1.5407 | 1.4765 | 1.441  | 1.0099 | 1.4439 | 1.3016 | 0.9046 |
| 41.5  | 1.513  | 1.5052 | 1.4495 | 1.5136 | 1.5416 | 1.4761 | 1.4415 | 1.0105 | 1.4431 | 1.3061 | 0.9086 |
| 41.75 | 1.513  | 1.5045 | 1.4496 | 1.5144 | 1.5413 | 1.4769 | 1.4408 | 1.0109 | 1.4428 | 1.3085 | 0.9134 |
| 42    | 1.5143 | 1.506  | 1.4492 | 1.5134 | 1.5405 | 1.4774 | 1.4402 | 1.0113 | 1.4422 | 1.3118 | 0.9169 |
| 42.25 | 1.5164 | 1.506  | 1.4512 | 1.5137 | 1.5427 | 1.4777 | 1.4407 | 1.0126 | 1.4425 | 1.3143 | 0.9211 |
| 42.5  | 1.5166 | 1.5062 | 1.4516 | 1.5147 | 1.5426 | 1.4787 | 1.4405 | 1.0137 | 1.4419 | 1.3164 | 0.925  |
| 42.75 | 1.518  | 1.506  | 1.4518 | 1.515  | 1.543  | 1.4786 | 1.44   | 1.0141 | 1.4424 | 1.3196 | 0.9279 |
| 43    | 1.5154 | 1.5053 | 1.4522 | 1.5154 | 1.5438 | 1.4806 | 1.4418 | 1.0139 | 1.442  | 1.3238 | 0.9322 |
| 43.25 | 1.5129 | 1.5059 | 1.4522 | 1.5148 | 1.5434 | 1.48   | 1.4422 | 1.0145 | 1.4423 | 1.3264 | 0.9369 |
| 43.5  | 1.5111 | 1.5064 | 1.4527 | 1.514  | 1.5435 | 1.4798 | 1.442  | 1.0151 | 1.4417 | 1.3277 | 0.9401 |
| 43.75 | 1.5114 | 1.5084 | 1.453  | 1.5143 | 1.5443 | 1.4809 | 1.442  | 1.0156 | 1.4416 | 1.3302 | 0.9443 |
| 44    | 1.5125 | 1.5078 | 1.4529 | 1.5139 | 1.5448 | 1.4807 | 1.4423 | 1.0158 | 1.4409 | 1.3314 | 0.9492 |
| 44.25 | 1.5102 | 1.5073 | 1.4529 | 1.5133 | 1.5444 | 1.4807 | 1.4425 | 1.017  | 1.4405 | 1.3319 | 0.9533 |
| 44.5  | 1.5105 | 1.5065 | 1.4523 | 1.5142 | 1.5439 | 1.48   | 1.4415 | 1.0165 | 1.4397 | 1.3327 | 0.9582 |
| 44.75 | 1.5104 | 1.5065 | 1.454  | 1.5145 | 1.5446 | 1.4809 | 1.4424 | 1.018  | 1.4403 | 1.3328 | 0.9608 |
| 45    | 1.5092 | 1.5064 | 1.4543 | 1.5147 | 1.5452 | 1.4809 | 1.4422 | 1.0201 | 1.439  | 1.3341 | 0.964  |
| 45.25 | 1.5105 | 1.5057 | 1.4541 | 1.514  | 1.5447 | 1.4813 | 1.4427 | 1.0203 | 1.4394 | 1.3342 | 0.9677 |
| 45.5  | 1.5103 | 1.5065 | 1.4557 | 1.5143 | 1.5455 | 1.4814 | 1.443  | 1.0208 | 1.44   | 1.3365 | 0.9708 |
| 45.75 | 1.51   | 1.5067 | 1.4559 | 1.5148 | 1.5463 | 1.4818 | 1.4447 | 1.0215 | 1.4404 | 1.3367 | 0.9742 |
| 46    | 1.5108 | 1.5061 | 1.4561 | 1.5154 | 1.5461 | 1.4812 | 1.4437 | 1.0228 | 1.4405 | 1.3373 | 0.9797 |
| 46.25 | 1.5109 | 1.5064 | 1.456  | 1.5155 | 1.5468 | 1.4819 | 1.4451 | 1.0233 | 1.4399 | 1.3387 | 0.984  |
| 46.5  | 1.511  | 1.5069 | 1.4571 | 1.5165 | 1.5469 | 1.4827 | 1.4454 | 1.0231 | 1.441  | 1.3404 | 0.9884 |
| 46.75 | 1.511  | 1.5052 | 1.4577 | 1.5166 | 1.5467 | 1.4821 | 1.4455 | 1.0244 | 1.4412 | 1.3399 | 0.9927 |
| 47    | 1.5111 | 1.5059 | 1.4574 | 1.5156 | 1.546  | 1.4824 | 1.4456 | 1.0243 | 1.4413 | 1.3405 | 0.9957 |
| 47.25 | 1.5102 | 1.5042 | 1.4571 | 1.5167 | 1.5463 | 1.4822 | 1.4461 | 1.0244 | 1.4419 | 1.3392 | 0.9995 |
| 47.5  | 1.5112 | 1.5044 | 1.4583 | 1.5158 | 1.5462 | 1.4829 | 1.4465 | 1.0239 | 1.4409 | 1.339  | 1.004  |
| 47.75 | 1.5109 | 1.5036 | 1.4575 | 1.5158 | 1.5464 | 1.4829 | 1.4468 | 1.025  | 1.4411 | 1.3388 | 1.0092 |
| 48    | 1.511  | 1.5046 | 1.4582 | 1.5155 | 1.5466 | 1.4827 | 1.4471 | 1.0253 | 1.4408 | 1.3382 | 1.0138 |
| 48.25 | 1.511  | 1.5042 | 1.4587 | 1.5154 | 1.5472 | 1.4826 | 1.4469 | 1.0252 | 1.4404 | 1.3373 | 1.0168 |
| 48.5  | 1.5111 | 1.504  | 1.4592 | 1.5145 | 1.546  | 1.4815 | 1.4468 | 1.0264 | 1.4405 | 1.3374 | 1.0216 |



|       |        |        |        |        |        |        |        |        |        |        |        |
|-------|--------|--------|--------|--------|--------|--------|--------|--------|--------|--------|--------|
| 48.75 | 1.5107 | 1.5019 | 1.4578 | 1.516  | 1.5466 | 1.4826 | 1.4475 | 1.0273 | 1.439  | 1.337  | 1.0247 |
| 49    | 1.5112 | 1.5026 | 1.4586 | 1.516  | 1.5473 | 1.4833 | 1.4477 | 1.0279 | 1.4377 | 1.3372 | 1.0295 |
| 49.25 | 1.5109 | 1.5034 | 1.4604 | 1.5153 | 1.5464 | 1.4827 | 1.4472 | 1.0282 | 1.4382 | 1.3365 | 1.0347 |
| 49.5  | 1.5094 | 1.504  | 1.4603 | 1.5172 | 1.5474 | 1.4829 | 1.4482 | 1.0287 | 1.4375 | 1.3368 | 1.0392 |
| 49.75 | 1.5105 | 1.5038 | 1.4602 | 1.5164 | 1.547  | 1.4839 | 1.4492 | 1.0299 | 1.4393 | 1.338  | 1.0435 |

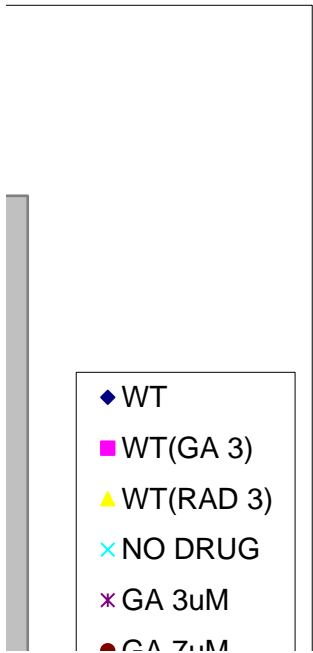

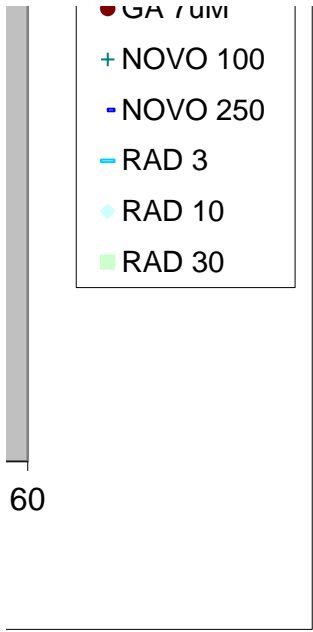

I9 I10 I11 I12 I13 I14 I15 I16

| TIME | WT     | WT(GA 3) | WT(RAD 3) | NO DRUG | GA 3uM | GA 7uM | NOVO 10 | NOVO 250 | RAD 3  | RAD 10 | RAD 30 |
|------|--------|----------|-----------|---------|--------|--------|---------|----------|--------|--------|--------|
| 0    | 0.1894 | 0.2051   | 0.1892    | 0.1815  | 0.1774 | 0.1639 | 0.2049  | 0.2557   | 0.1455 | 0.1469 | 0.1551 |
| 0.25 | 0.1844 | 0.1929   | 0.1812    | 0.1724  | 0.168  | 0.1564 | 0.208   | 0.2562   | 0.1352 | 0.1361 | 0.1471 |
| 0.5  | 0.1833 | 0.1912   | 0.1787    | 0.1709  | 0.1649 | 0.1566 | 0.2102  | 0.2593   | 0.1344 | 0.1351 | 0.1461 |
| 0.75 | 0.1838 | 0.189    | 0.1758    | 0.1694  | 0.1646 | 0.1563 | 0.2114  | 0.2621   | 0.133  | 0.1343 | 0.1469 |
| 1    | 0.1843 | 0.1877   | 0.1818    | 0.1691  | 0.1634 | 0.1554 | 0.2127  | 0.2637   | 0.1338 | 0.1347 | 0.1472 |

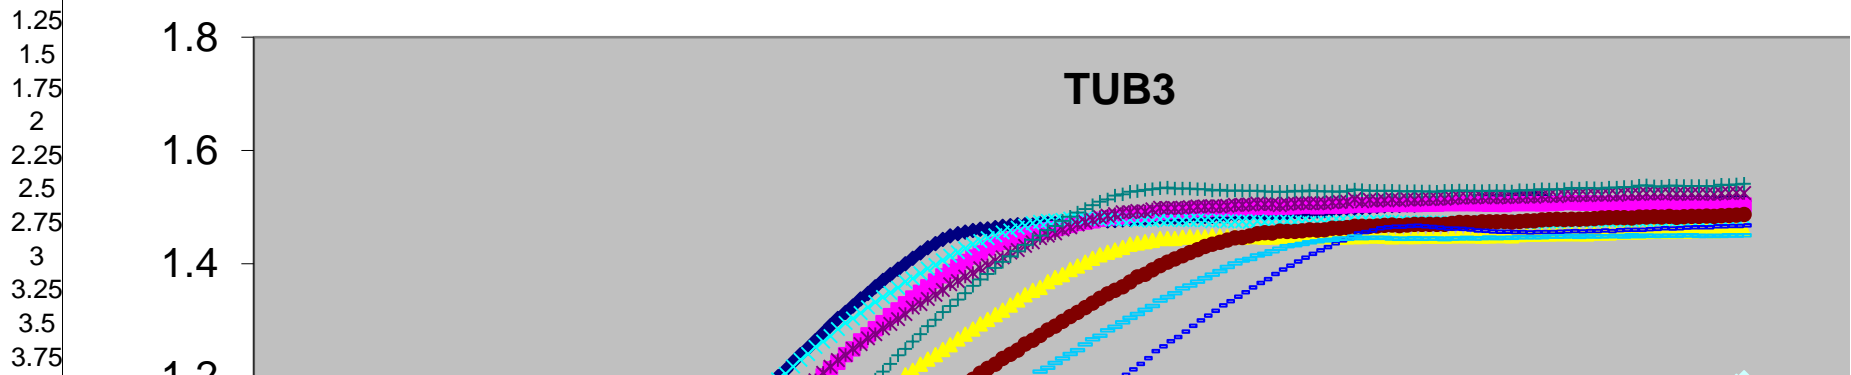

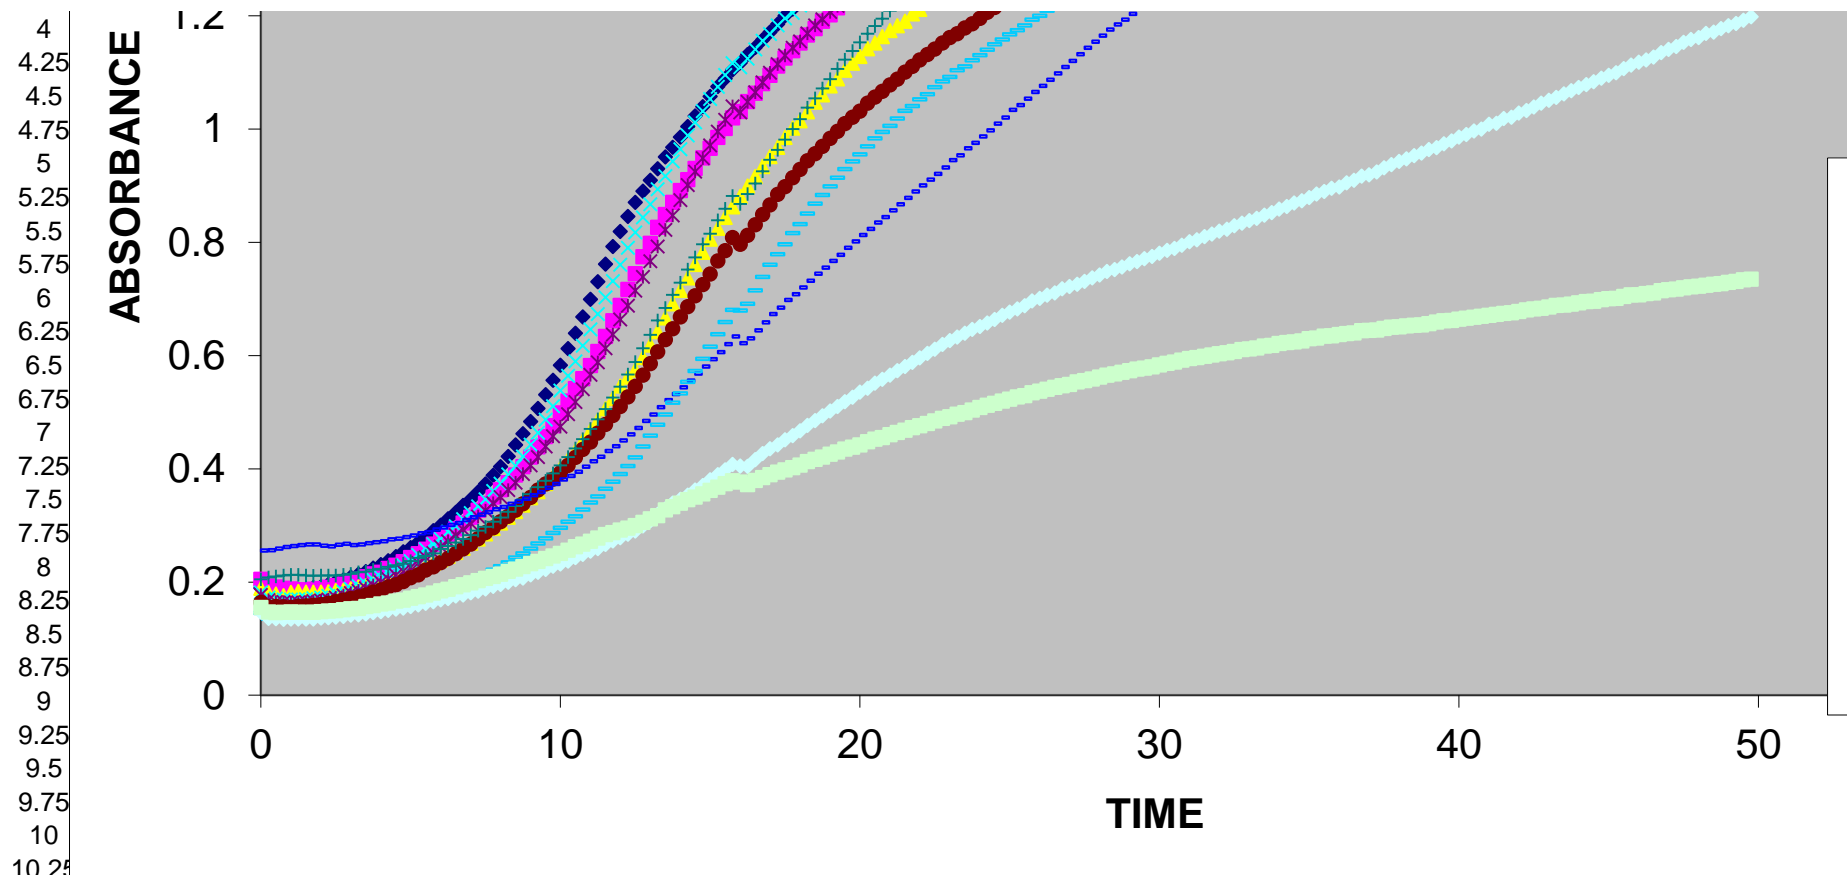

|       |        |        |        |        |        |        |        |        |        |        |        |
|-------|--------|--------|--------|--------|--------|--------|--------|--------|--------|--------|--------|
| 10.5  | 0.6397 | 0.5418 | 0.4316 | 0.5898 | 0.5179 | 0.4204 | 0.436  | 0.3949 | 0.3164 | 0.2431 | 0.2623 |
| 10.75 | 0.6685 | 0.5593 | 0.4497 | 0.6177 | 0.5405 | 0.4346 | 0.4522 | 0.4041 | 0.3279 | 0.2487 | 0.267  |
| 11    | 0.6992 | 0.5825 | 0.4678 | 0.6463 | 0.5661 | 0.4471 | 0.4708 | 0.4136 | 0.3408 | 0.2544 | 0.2719 |
| 11.25 | 0.7307 | 0.6075 | 0.4857 | 0.6732 | 0.5882 | 0.4634 | 0.4875 | 0.4214 | 0.351  | 0.2592 | 0.2777 |
| 11.5  | 0.7614 | 0.6339 | 0.5059 | 0.7028 | 0.6128 | 0.4784 | 0.5056 | 0.4317 | 0.3646 | 0.2666 | 0.2839 |
| 11.75 | 0.7927 | 0.6618 | 0.5242 | 0.7319 | 0.6374 | 0.4941 | 0.5258 | 0.4402 | 0.3774 | 0.2726 | 0.2875 |
| 12    | 0.8194 | 0.6889 | 0.5464 | 0.7607 | 0.6639 | 0.51   | 0.5452 | 0.4501 | 0.391  | 0.2785 | 0.2919 |
| 12.25 | 0.8459 | 0.7168 | 0.5622 | 0.7902 | 0.6881 | 0.5273 | 0.5669 | 0.4607 | 0.4052 | 0.2843 | 0.2955 |
| 12.5  | 0.8706 | 0.7448 | 0.5743 | 0.8176 | 0.7148 | 0.5458 | 0.5884 | 0.4721 | 0.42   | 0.2902 | 0.3    |
| 12.75 | 0.8904 | 0.7744 | 0.5968 | 0.8442 | 0.7388 | 0.5655 | 0.6127 | 0.4847 | 0.4392 | 0.2991 | 0.3052 |
| 13    | 0.9099 | 0.7982 | 0.6186 | 0.8674 | 0.7666 | 0.5856 | 0.6368 | 0.4962 | 0.4584 | 0.3083 | 0.3116 |
| 13.25 | 0.9301 | 0.8269 | 0.6426 | 0.8939 | 0.7929 | 0.6069 | 0.6621 | 0.5088 | 0.478  | 0.3194 | 0.3175 |
| 13.5  | 0.9508 | 0.849  | 0.6665 | 0.9172 | 0.8219 | 0.6281 | 0.6843 | 0.5212 | 0.4961 | 0.3294 | 0.3275 |
| 13.75 | 0.9679 | 0.8707 | 0.6913 | 0.9429 | 0.8476 | 0.6476 | 0.7075 | 0.5321 | 0.5168 | 0.3392 | 0.3332 |
| 14    | 0.986  | 0.8918 | 0.7152 | 0.9647 | 0.8745 | 0.6681 | 0.7289 | 0.544  | 0.533  | 0.346  | 0.3392 |
| 14.25 | 1.0047 | 0.9106 | 0.7372 | 0.989  | 0.9011 | 0.6867 | 0.752  | 0.5558 | 0.5536 | 0.3536 | 0.3454 |

|       |        |        |        |        |        |        |        |        |        |        |        |
|-------|--------|--------|--------|--------|--------|--------|--------|--------|--------|--------|--------|
| 14.5  | 1.0233 | 0.9308 | 0.7608 | 1.0123 | 0.9251 | 0.7058 | 0.7736 | 0.5682 | 0.573  | 0.3625 | 0.3503 |
| 14.75 | 1.0397 | 0.9491 | 0.7825 | 1.032  | 0.9489 | 0.7254 | 0.7964 | 0.5807 | 0.5944 | 0.3702 | 0.3556 |
| 15    | 1.0577 | 0.966  | 0.8057 | 1.0535 | 0.9716 | 0.744  | 0.8154 | 0.594  | 0.6157 | 0.3804 | 0.3621 |
| 15.25 | 1.0753 | 0.9853 | 0.8251 | 1.0747 | 0.9954 | 0.7673 | 0.8392 | 0.6063 | 0.6381 | 0.3896 | 0.3678 |
| 15.5  | 1.0897 | 1.0015 | 0.8439 | 1.0958 | 1.0167 | 0.7854 | 0.8592 | 0.6206 | 0.6592 | 0.3984 | 0.3736 |
| 15.75 | 1.1049 | 1.0198 | 0.8628 | 1.1166 | 1.0404 | 0.8083 | 0.8819 | 0.6341 | 0.6807 | 0.408  | 0.379  |
| 16    | 1.1171 | 1.031  | 0.8817 | 1.1091 | 1.0298 | 0.7967 | 0.8679 | 0.6219 | 0.6796 | 0.4048 | 0.3765 |
| 16.25 | 1.1316 | 1.0487 | 0.8996 | 1.1245 | 1.0483 | 0.8127 | 0.8853 | 0.6303 | 0.6915 | 0.4045 | 0.3722 |
| 16.5  | 1.1443 | 1.0637 | 0.9165 | 1.1408 | 1.0652 | 0.8314 | 0.9038 | 0.6446 | 0.7155 | 0.4161 | 0.3797 |
| 16.75 | 1.1579 | 1.0806 | 0.9342 | 1.156  | 1.0828 | 0.8491 | 0.9254 | 0.6588 | 0.7391 | 0.4269 | 0.3846 |
| 17    | 1.1715 | 1.0952 | 0.9517 | 1.1683 | 1.0999 | 0.8664 | 0.9457 | 0.6734 | 0.7605 | 0.4353 | 0.3896 |
| 17.25 | 1.1858 | 1.1114 | 0.9682 | 1.1835 | 1.1151 | 0.8848 | 0.9637 | 0.6849 | 0.7793 | 0.4421 | 0.3945 |
| 17.5  | 1.2004 | 1.1256 | 0.9855 | 1.1955 | 1.1299 | 0.8984 | 0.9817 | 0.6981 | 0.7966 | 0.4512 | 0.398  |
| 17.75 | 1.2123 | 1.1388 | 1.0016 | 1.2056 | 1.1435 | 0.9145 | 1      | 0.7086 | 0.8163 | 0.4586 | 0.4022 |
| 18    | 1.2261 | 1.1522 | 1.015  | 1.2183 | 1.1552 | 0.9289 | 1.0175 | 0.7202 | 0.8325 | 0.4672 | 0.4069 |
| 18.25 | 1.239  | 1.1664 | 1.0307 | 1.2302 | 1.1692 | 0.9441 | 1.0383 | 0.7321 | 0.8507 | 0.4768 | 0.4131 |
| 18.5  | 1.251  | 1.1779 | 1.0478 | 1.2405 | 1.1835 | 0.9565 | 1.0547 | 0.7445 | 0.8682 | 0.4852 | 0.4171 |
| 18.75 | 1.2641 | 1.1907 | 1.0607 | 1.2528 | 1.1941 | 0.9697 | 1.072  | 0.7553 | 0.884  | 0.4937 | 0.421  |
| 19    | 1.2773 | 1.2018 | 1.0765 | 1.2622 | 1.2068 | 0.9835 | 1.0882 | 0.7675 | 0.899  | 0.502  | 0.426  |
| 19.25 | 1.2907 | 1.2145 | 1.0891 | 1.2718 | 1.218  | 0.9963 | 1.1065 | 0.7781 | 0.914  | 0.5101 | 0.4301 |
| 19.5  | 1.3032 | 1.2259 | 1.1041 | 1.2844 | 1.2297 | 1.0099 | 1.1226 | 0.7907 | 0.9293 | 0.5183 | 0.4348 |
| 19.75 | 1.3141 | 1.239  | 1.1166 | 1.2951 | 1.2386 | 1.0211 | 1.1381 | 0.8019 | 0.9428 | 0.5265 | 0.4385 |
| 20    | 1.3251 | 1.2497 | 1.1283 | 1.3029 | 1.2492 | 1.0317 | 1.1531 | 0.8129 | 0.9555 | 0.5353 | 0.4425 |
| 20.25 | 1.3374 | 1.2637 | 1.1419 | 1.313  | 1.258  | 1.0462 | 1.1684 | 0.824  | 0.9697 | 0.5423 | 0.4477 |
| 20.5  | 1.3474 | 1.2743 | 1.1521 | 1.3227 | 1.2682 | 1.0567 | 1.182  | 0.8349 | 0.9837 | 0.5512 | 0.4523 |
| 20.75 | 1.3589 | 1.2848 | 1.1637 | 1.3319 | 1.2754 | 1.0671 | 1.1954 | 0.8447 | 0.9951 | 0.5579 | 0.4553 |
| 21    | 1.3704 | 1.2956 | 1.1744 | 1.3408 | 1.2858 | 1.0779 | 1.2094 | 0.8564 | 1.0059 | 0.5655 | 0.4603 |
| 21.25 | 1.3806 | 1.3083 | 1.1829 | 1.3482 | 1.2937 | 1.0885 | 1.2231 | 0.8672 | 1.0186 | 0.5735 | 0.4644 |
| 21.5  | 1.39   | 1.3184 | 1.1906 | 1.3574 | 1.3022 | 1.1009 | 1.2379 | 0.8788 | 1.0322 | 0.5807 | 0.468  |
| 21.75 | 1.3999 | 1.3289 | 1.2037 | 1.3682 | 1.3112 | 1.111  | 1.2494 | 0.8897 | 1.0406 | 0.5883 | 0.473  |
| 22    | 1.4093 | 1.3395 | 1.2116 | 1.3736 | 1.3226 | 1.1221 | 1.2624 | 0.9005 | 1.053  | 0.5962 | 0.476  |
| 22.25 | 1.4189 | 1.3493 | 1.2223 | 1.3827 | 1.3285 | 1.1321 | 1.2754 | 0.9107 | 1.0618 | 0.604  | 0.4801 |
| 22.5  | 1.4278 | 1.3589 | 1.2316 | 1.3911 | 1.3376 | 1.1417 | 1.2893 | 0.9212 | 1.0744 | 0.6112 | 0.4847 |
| 22.75 | 1.4356 | 1.369  | 1.2391 | 1.3975 | 1.345  | 1.1524 | 1.3008 | 0.9325 | 1.0844 | 0.6195 | 0.489  |
| 23    | 1.4425 | 1.3781 | 1.2485 | 1.4058 | 1.3535 | 1.1619 | 1.3147 | 0.9451 | 1.0925 | 0.6263 | 0.4919 |
| 23.25 | 1.4488 | 1.3861 | 1.257  | 1.4137 | 1.3638 | 1.1685 | 1.3254 | 0.954  | 1.1041 | 0.6326 | 0.4963 |
| 23.5  | 1.4527 | 1.3947 | 1.2667 | 1.4202 | 1.369  | 1.179  | 1.3366 | 0.966  | 1.1111 | 0.6394 | 0.4996 |
| 23.75 | 1.4559 | 1.4037 | 1.2752 | 1.4267 | 1.377  | 1.1862 | 1.3477 | 0.9761 | 1.1215 | 0.6462 | 0.5037 |
| 24    | 1.4583 | 1.4119 | 1.2845 | 1.4341 | 1.3834 | 1.1958 | 1.3608 | 0.9871 | 1.1307 | 0.6512 | 0.5082 |
| 24.25 | 1.4609 | 1.4188 | 1.2937 | 1.4401 | 1.3916 | 1.2063 | 1.372  | 0.9981 | 1.1406 | 0.6578 | 0.5121 |
| 24.5  | 1.4615 | 1.4276 | 1.3014 | 1.4449 | 1.3972 | 1.2148 | 1.3819 | 1.0096 | 1.1498 | 0.6636 | 0.5159 |
| 24.75 | 1.4635 | 1.4341 | 1.3101 | 1.45   | 1.4057 | 1.2222 | 1.3922 | 1.0205 | 1.1586 | 0.6711 | 0.5195 |

|       |        |        |        |        |        |        |        |        |        |        |        |
|-------|--------|--------|--------|--------|--------|--------|--------|--------|--------|--------|--------|
| 25    | 1.466  | 1.4379 | 1.3177 | 1.4552 | 1.4112 | 1.2327 | 1.403  | 1.0341 | 1.1674 | 0.6768 | 0.5232 |
| 25.25 | 1.4669 | 1.4431 | 1.3269 | 1.4583 | 1.4194 | 1.2401 | 1.4126 | 1.0425 | 1.1747 | 0.6826 | 0.5273 |
| 25.5  | 1.4687 | 1.4476 | 1.3358 | 1.4635 | 1.4243 | 1.2473 | 1.4219 | 1.0541 | 1.1831 | 0.6883 | 0.5295 |
| 25.75 | 1.4687 | 1.4518 | 1.345  | 1.4668 | 1.4313 | 1.258  | 1.4329 | 1.066  | 1.1934 | 0.6966 | 0.5345 |
| 26    | 1.4682 | 1.453  | 1.3526 | 1.4718 | 1.4376 | 1.2647 | 1.4422 | 1.0762 | 1.2    | 0.7013 | 0.537  |
| 26.25 | 1.4704 | 1.4557 | 1.3577 | 1.4738 | 1.4449 | 1.2733 | 1.4495 | 1.087  | 1.2095 | 0.7068 | 0.5404 |
| 26.5  | 1.4702 | 1.4595 | 1.368  | 1.4754 | 1.4496 | 1.283  | 1.4594 | 1.0987 | 1.2161 | 0.7105 | 0.5438 |
| 26.75 | 1.4706 | 1.4619 | 1.3756 | 1.476  | 1.4535 | 1.2895 | 1.4664 | 1.11   | 1.2245 | 0.7179 | 0.5469 |
| 27    | 1.4716 | 1.4639 | 1.3808 | 1.4774 | 1.4603 | 1.298  | 1.4755 | 1.1207 | 1.2322 | 0.7218 | 0.5493 |
| 27.25 | 1.4725 | 1.4677 | 1.3894 | 1.4793 | 1.4642 | 1.3067 | 1.4828 | 1.1322 | 1.2405 | 0.7262 | 0.5537 |
| 27.5  | 1.473  | 1.4709 | 1.396  | 1.4798 | 1.4695 | 1.3138 | 1.4902 | 1.1435 | 1.2469 | 0.731  | 0.5561 |
| 27.75 | 1.4747 | 1.4735 | 1.4025 | 1.48   | 1.473  | 1.3224 | 1.4963 | 1.1543 | 1.2571 | 0.7371 | 0.5587 |
| 28    | 1.4747 | 1.4758 | 1.4095 | 1.4784 | 1.4771 | 1.3305 | 1.5033 | 1.165  | 1.2664 | 0.7423 | 0.5623 |
| 28.25 | 1.4772 | 1.4784 | 1.4156 | 1.4782 | 1.4822 | 1.3389 | 1.5092 | 1.1757 | 1.2725 | 0.7487 | 0.5657 |
| 28.5  | 1.4758 | 1.4806 | 1.4201 | 1.4801 | 1.4848 | 1.3465 | 1.5134 | 1.1848 | 1.282  | 0.7522 | 0.5679 |
| 28.75 | 1.4763 | 1.4813 | 1.4239 | 1.478  | 1.4872 | 1.3531 | 1.5203 | 1.1934 | 1.2882 | 0.7564 | 0.5708 |
| 29    | 1.4771 | 1.4829 | 1.4289 | 1.4782 | 1.4908 | 1.359  | 1.5227 | 1.2038 | 1.2966 | 0.7621 | 0.5736 |
| 29.25 | 1.4786 | 1.485  | 1.4341 | 1.4784 | 1.491  | 1.3677 | 1.5267 | 1.2133 | 1.3042 | 0.766  | 0.5762 |
| 29.5  | 1.4803 | 1.4861 | 1.4367 | 1.4761 | 1.4931 | 1.3768 | 1.5283 | 1.2231 | 1.3112 | 0.771  | 0.5779 |
| 29.75 | 1.4807 | 1.4866 | 1.4387 | 1.4773 | 1.4919 | 1.3811 | 1.5301 | 1.2333 | 1.3183 | 0.7751 | 0.5804 |
| 30    | 1.4823 | 1.4892 | 1.4412 | 1.4762 | 1.4958 | 1.3889 | 1.5316 | 1.2456 | 1.3253 | 0.7806 | 0.5835 |
| 30.25 | 1.4831 | 1.49   | 1.4444 | 1.4784 | 1.4987 | 1.3965 | 1.5334 | 1.2537 | 1.3346 | 0.7858 | 0.5862 |
| 30.5  | 1.4829 | 1.4913 | 1.4444 | 1.4773 | 1.4981 | 1.4027 | 1.5342 | 1.2628 | 1.3411 | 0.7896 | 0.5887 |
| 30.75 | 1.4823 | 1.4923 | 1.4446 | 1.478  | 1.4982 | 1.4081 | 1.5326 | 1.2702 | 1.348  | 0.7952 | 0.5923 |
| 31    | 1.4825 | 1.4929 | 1.4466 | 1.4766 | 1.4988 | 1.414  | 1.5326 | 1.2802 | 1.3565 | 0.801  | 0.595  |
| 31.25 | 1.4843 | 1.4939 | 1.448  | 1.4769 | 1.5001 | 1.4197 | 1.5327 | 1.29   | 1.3611 | 0.8044 | 0.5968 |
| 31.5  | 1.4842 | 1.496  | 1.4475 | 1.4772 | 1.5007 | 1.4248 | 1.5316 | 1.2996 | 1.3682 | 0.8103 | 0.5986 |
| 31.75 | 1.4837 | 1.4956 | 1.4475 | 1.4767 | 1.5012 | 1.4305 | 1.5317 | 1.3082 | 1.3743 | 0.8148 | 0.6013 |
| 32    | 1.4837 | 1.4964 | 1.4488 | 1.4751 | 1.5018 | 1.4342 | 1.5295 | 1.3166 | 1.3808 | 0.8196 | 0.6032 |
| 32.25 | 1.4847 | 1.4969 | 1.4483 | 1.4761 | 1.5008 | 1.4378 | 1.5303 | 1.3263 | 1.3868 | 0.8235 | 0.6051 |
| 32.5  | 1.4848 | 1.4964 | 1.448  | 1.4748 | 1.502  | 1.4415 | 1.5288 | 1.3335 | 1.3939 | 0.8292 | 0.6071 |
| 32.75 | 1.4858 | 1.4974 | 1.448  | 1.475  | 1.5036 | 1.4453 | 1.5291 | 1.3418 | 1.4001 | 0.834  | 0.6109 |
| 33    | 1.4867 | 1.4992 | 1.4467 | 1.4749 | 1.5038 | 1.4462 | 1.5287 | 1.3496 | 1.4054 | 0.8384 | 0.6116 |
| 33.25 | 1.4876 | 1.498  | 1.4476 | 1.4739 | 1.5045 | 1.4487 | 1.5285 | 1.3582 | 1.4084 | 0.8423 | 0.6134 |
| 33.5  | 1.4885 | 1.4993 | 1.4481 | 1.475  | 1.5062 | 1.4529 | 1.5289 | 1.3661 | 1.4146 | 0.8479 | 0.617  |
| 33.75 | 1.4883 | 1.4994 | 1.4469 | 1.473  | 1.505  | 1.4549 | 1.5278 | 1.3726 | 1.4172 | 0.8529 | 0.6179 |
| 34    | 1.4888 | 1.4988 | 1.4474 | 1.4738 | 1.5057 | 1.4542 | 1.5267 | 1.3815 | 1.4217 | 0.859  | 0.6215 |
| 34.25 | 1.4892 | 1.4995 | 1.4471 | 1.4737 | 1.5035 | 1.4576 | 1.5268 | 1.3895 | 1.4261 | 0.8631 | 0.6229 |
| 34.5  | 1.4899 | 1.4996 | 1.4474 | 1.4744 | 1.5057 | 1.4571 | 1.5272 | 1.3962 | 1.4306 | 0.8697 | 0.6244 |
| 34.75 | 1.4919 | 1.5003 | 1.4472 | 1.4735 | 1.506  | 1.4567 | 1.5286 | 1.4036 | 1.4326 | 0.8738 | 0.6258 |
| 35    | 1.492  | 1.5014 | 1.4486 | 1.4728 | 1.5073 | 1.4578 | 1.5278 | 1.4104 | 1.4349 | 0.8794 | 0.6297 |
| 35.25 | 1.4922 | 1.502  | 1.4486 | 1.4717 | 1.5068 | 1.4599 | 1.5293 | 1.4175 | 1.4376 | 0.8853 | 0.6311 |

|       |        |        |        |        |        |        |        |        |        |        |        |
|-------|--------|--------|--------|--------|--------|--------|--------|--------|--------|--------|--------|
| 35.5  | 1.4933 | 1.5004 | 1.4477 | 1.4717 | 1.5068 | 1.4594 | 1.528  | 1.4236 | 1.4395 | 0.8897 | 0.6343 |
| 35.75 | 1.4939 | 1.5019 | 1.4479 | 1.472  | 1.5067 | 1.4595 | 1.5276 | 1.4293 | 1.4408 | 0.8958 | 0.635  |
| 36    | 1.4951 | 1.5018 | 1.4476 | 1.4722 | 1.5083 | 1.4625 | 1.5275 | 1.4358 | 1.4421 | 0.8977 | 0.6371 |
| 36.25 | 1.4965 | 1.5015 | 1.4469 | 1.473  | 1.5089 | 1.4624 | 1.5267 | 1.4411 | 1.4442 | 0.9052 | 0.6392 |
| 36.5  | 1.4976 | 1.5021 | 1.4473 | 1.4725 | 1.5095 | 1.4638 | 1.5279 | 1.4452 | 1.4436 | 0.9095 | 0.6399 |
| 36.75 | 1.4983 | 1.5037 | 1.4481 | 1.4742 | 1.5139 | 1.4658 | 1.5309 | 1.4535 | 1.4478 | 0.9171 | 0.6441 |
| 37    | 1.4992 | 1.5034 | 1.4477 | 1.474  | 1.5101 | 1.466  | 1.5296 | 1.4556 | 1.4452 | 0.9195 | 0.6447 |
| 37.25 | 1.4997 | 1.504  | 1.449  | 1.4732 | 1.5127 | 1.4658 | 1.5286 | 1.4586 | 1.4456 | 0.9247 | 0.6452 |
| 37.5  | 1.5011 | 1.5037 | 1.4489 | 1.4739 | 1.5113 | 1.4663 | 1.5289 | 1.4623 | 1.4456 | 0.9316 | 0.648  |
| 37.75 | 1.502  | 1.505  | 1.4486 | 1.4738 | 1.5125 | 1.4674 | 1.5288 | 1.4645 | 1.4457 | 0.9372 | 0.6502 |
| 38    | 1.5029 | 1.5047 | 1.4475 | 1.4742 | 1.5139 | 1.4683 | 1.5284 | 1.4653 | 1.4442 | 0.9429 | 0.6506 |
| 38.25 | 1.5029 | 1.5046 | 1.449  | 1.4732 | 1.5116 | 1.4671 | 1.528  | 1.4652 | 1.4439 | 0.9474 | 0.6526 |
| 38.5  | 1.504  | 1.505  | 1.4481 | 1.4721 | 1.5137 | 1.468  | 1.5273 | 1.4664 | 1.444  | 0.953  | 0.6535 |
| 38.75 | 1.5035 | 1.5042 | 1.448  | 1.4721 | 1.5129 | 1.4692 | 1.5279 | 1.4672 | 1.4448 | 0.9578 | 0.6545 |
| 39    | 1.5042 | 1.505  | 1.4488 | 1.4734 | 1.5139 | 1.4695 | 1.5275 | 1.4657 | 1.4441 | 0.9642 | 0.6567 |
| 39.25 | 1.5058 | 1.5049 | 1.4482 | 1.4727 | 1.5138 | 1.4691 | 1.5277 | 1.4648 | 1.4442 | 0.9671 | 0.6595 |
| 39.5  | 1.507  | 1.5052 | 1.4485 | 1.4727 | 1.5144 | 1.4691 | 1.5271 | 1.4634 | 1.4443 | 0.9741 | 0.6615 |
| 39.75 | 1.5073 | 1.506  | 1.4484 | 1.4719 | 1.5145 | 1.4696 | 1.5285 | 1.462  | 1.4433 | 0.979  | 0.662  |
| 40    | 1.5077 | 1.5062 | 1.4489 | 1.4722 | 1.5159 | 1.4709 | 1.5286 | 1.4622 | 1.4442 | 0.9859 | 0.6643 |
| 40.25 | 1.5093 | 1.5063 | 1.4496 | 1.4728 | 1.5168 | 1.4728 | 1.5293 | 1.4614 | 1.4445 | 0.9907 | 0.6662 |
| 40.5  | 1.5096 | 1.506  | 1.4489 | 1.4726 | 1.5168 | 1.4726 | 1.5288 | 1.4605 | 1.4456 | 0.9969 | 0.6676 |
| 40.75 | 1.5108 | 1.5059 | 1.4494 | 1.4727 | 1.5168 | 1.4719 | 1.5287 | 1.4583 | 1.4443 | 1      | 0.6697 |
| 41    | 1.5129 | 1.5053 | 1.4485 | 1.4737 | 1.5171 | 1.4736 | 1.528  | 1.4579 | 1.4451 | 1.0084 | 0.6712 |
| 41.25 | 1.5127 | 1.5048 | 1.4491 | 1.4725 | 1.5179 | 1.4737 | 1.5286 | 1.4571 | 1.446  | 1.0103 | 0.673  |
| 41.5  | 1.513  | 1.5052 | 1.4495 | 1.4719 | 1.5168 | 1.474  | 1.5289 | 1.4564 | 1.4449 | 1.0188 | 0.6743 |
| 41.75 | 1.513  | 1.5045 | 1.4496 | 1.4729 | 1.5173 | 1.4745 | 1.5287 | 1.4562 | 1.4458 | 1.0212 | 0.6758 |
| 42    | 1.5143 | 1.506  | 1.4492 | 1.4731 | 1.5178 | 1.4732 | 1.5277 | 1.4556 | 1.4453 | 1.0285 | 0.6782 |
| 42.25 | 1.5164 | 1.506  | 1.4512 | 1.4743 | 1.5179 | 1.4746 | 1.5297 | 1.4556 | 1.4466 | 1.0331 | 0.6807 |
| 42.5  | 1.5166 | 1.5062 | 1.4516 | 1.4735 | 1.5193 | 1.4754 | 1.5291 | 1.455  | 1.4469 | 1.0393 | 0.6823 |
| 42.75 | 1.518  | 1.506  | 1.4518 | 1.4734 | 1.5178 | 1.4754 | 1.5305 | 1.4556 | 1.4467 | 1.0458 | 0.6836 |
| 43    | 1.5154 | 1.5053 | 1.4522 | 1.4743 | 1.5198 | 1.4771 | 1.5317 | 1.4558 | 1.4468 | 1.051  | 0.6859 |
| 43.25 | 1.5129 | 1.5059 | 1.4522 | 1.4746 | 1.5204 | 1.4776 | 1.5308 | 1.4555 | 1.4477 | 1.0563 | 0.6885 |
| 43.5  | 1.5111 | 1.5064 | 1.4527 | 1.4743 | 1.5192 | 1.4784 | 1.5313 | 1.4563 | 1.4478 | 1.0623 | 0.6893 |
| 43.75 | 1.5114 | 1.5084 | 1.453  | 1.475  | 1.5211 | 1.478  | 1.5314 | 1.4568 | 1.4476 | 1.0682 | 0.6912 |
| 44    | 1.5125 | 1.5078 | 1.4529 | 1.4759 | 1.521  | 1.4785 | 1.5339 | 1.4572 | 1.4488 | 1.0738 | 0.6935 |
| 44.25 | 1.5102 | 1.5073 | 1.4529 | 1.4761 | 1.5215 | 1.4782 | 1.5325 | 1.4568 | 1.4475 | 1.0789 | 0.6954 |
| 44.5  | 1.5105 | 1.5065 | 1.4523 | 1.4761 | 1.5205 | 1.4792 | 1.5337 | 1.4574 | 1.4488 | 1.0839 | 0.6962 |
| 44.75 | 1.5104 | 1.5065 | 1.454  | 1.4762 | 1.5219 | 1.4795 | 1.5332 | 1.4575 | 1.4477 | 1.0902 | 0.6989 |
| 45    | 1.5092 | 1.5064 | 1.4543 | 1.4767 | 1.5215 | 1.4807 | 1.5325 | 1.4587 | 1.4484 | 1.0954 | 0.7004 |
| 45.25 | 1.5105 | 1.5057 | 1.4541 | 1.4761 | 1.5226 | 1.4812 | 1.5343 | 1.4575 | 1.4485 | 1.0998 | 0.7013 |
| 45.5  | 1.5103 | 1.5065 | 1.4557 | 1.477  | 1.5216 | 1.4814 | 1.5345 | 1.4589 | 1.4487 | 1.1068 | 0.7043 |
| 45.75 | 1.51   | 1.5067 | 1.4559 | 1.4768 | 1.5235 | 1.4813 | 1.5355 | 1.4597 | 1.4481 | 1.113  | 0.7074 |



|       |        |        |        |        |        |        |        |        |        |        |        |
|-------|--------|--------|--------|--------|--------|--------|--------|--------|--------|--------|--------|
| 46    | 1.5108 | 1.5061 | 1.4561 | 1.4769 | 1.5229 | 1.4808 | 1.5356 | 1.4598 | 1.4499 | 1.1181 | 0.7076 |
| 46.25 | 1.5109 | 1.5064 | 1.456  | 1.4772 | 1.523  | 1.4824 | 1.5375 | 1.4599 | 1.4485 | 1.122  | 0.7099 |
| 46.5  | 1.511  | 1.5069 | 1.4571 | 1.4775 | 1.5239 | 1.4826 | 1.5384 | 1.4609 | 1.4493 | 1.1274 | 0.7106 |
| 46.75 | 1.511  | 1.5052 | 1.4577 | 1.4777 | 1.5235 | 1.4827 | 1.5367 | 1.4612 | 1.4488 | 1.1353 | 0.7148 |
| 47    | 1.5111 | 1.5059 | 1.4574 | 1.4779 | 1.5241 | 1.4824 | 1.5361 | 1.4623 | 1.449  | 1.1411 | 0.7164 |
| 47.25 | 1.5102 | 1.5042 | 1.4571 | 1.4775 | 1.5241 | 1.4833 | 1.5376 | 1.4621 | 1.4495 | 1.1461 | 0.7177 |
| 47.5  | 1.5112 | 1.5044 | 1.4583 | 1.4781 | 1.5232 | 1.482  | 1.5379 | 1.4625 | 1.4487 | 1.1532 | 0.72   |
| 47.75 | 1.5109 | 1.5036 | 1.4575 | 1.4774 | 1.5236 | 1.4831 | 1.5372 | 1.4634 | 1.45   | 1.1586 | 0.7214 |
| 48    | 1.511  | 1.5046 | 1.4582 | 1.4773 | 1.5233 | 1.4833 | 1.537  | 1.4643 | 1.45   | 1.1621 | 0.7227 |
| 48.25 | 1.511  | 1.5042 | 1.4587 | 1.4765 | 1.5237 | 1.4836 | 1.5372 | 1.4641 | 1.4488 | 1.1691 | 0.7244 |
| 48.5  | 1.5111 | 1.504  | 1.4592 | 1.478  | 1.5238 | 1.4842 | 1.5374 | 1.4644 | 1.4489 | 1.1716 | 0.7258 |
| 48.75 | 1.5107 | 1.5019 | 1.4578 | 1.4774 | 1.5231 | 1.4833 | 1.5367 | 1.4658 | 1.4488 | 1.1778 | 0.7271 |
| 49    | 1.5112 | 1.5026 | 1.4586 | 1.4788 | 1.524  | 1.4848 | 1.5396 | 1.4662 | 1.4491 | 1.1828 | 0.7296 |
| 49.25 | 1.5109 | 1.5034 | 1.4604 | 1.4781 | 1.5248 | 1.4853 | 1.539  | 1.4666 | 1.4501 | 1.1866 | 0.731  |
| 49.5  | 1.5094 | 1.504  | 1.4603 | 1.4787 | 1.5255 | 1.4857 | 1.5399 | 1.4667 | 1.4493 | 1.1921 | 0.7338 |
| 49.75 | 1.5105 | 1.5038 | 1.4602 | 1.4807 | 1.5248 | 1.4868 | 1.5412 | 1.4676 | 1.4503 | 1.1986 | 0.735  |

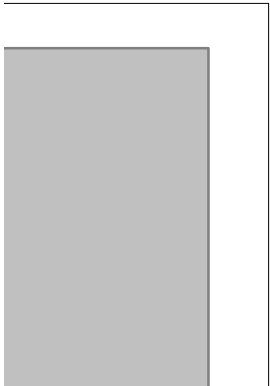

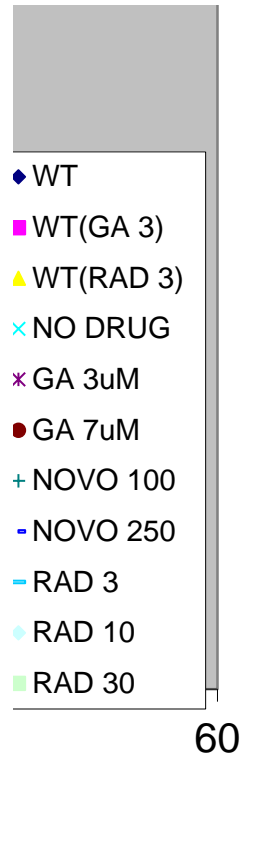

## VAC 17

| TIME | WT     | WT(GA 3) | WT(RAD 3) | NO DRUG | E1     | E2     | E3       | E4       | E5     | E6     | E7     | E8 |
|------|--------|----------|-----------|---------|--------|--------|----------|----------|--------|--------|--------|----|
|      |        |          |           |         | GA 3uM | GA 7uM | NOVO 100 | NOVO 250 | RAD 3  | RAD 10 | RAD 30 |    |
| 0    | 0.1894 | 0.2051   | 0.1892    | 0.1588  | 0.1688 | 0.1625 | 0.228    | 0.2712   | 0.1722 | 0.1665 | 0.1592 |    |
| 0.25 | 0.1844 | 0.1929   | 0.1812    | 0.151   | 0.1569 | 0.1506 | 0.2304   | 0.2719   | 0.1533 | 0.1528 | 0.1475 |    |
| 0.5  | 0.1833 | 0.1912   | 0.1787    | 0.1491  | 0.1549 | 0.1491 | 0.2324   | 0.2745   | 0.1503 | 0.1516 | 0.146  |    |
| 0.75 | 0.1838 | 0.189    | 0.1758    | 0.1461  | 0.1532 | 0.1466 | 0.2318   | 0.2723   | 0.1479 | 0.149  | 0.1448 |    |
| 1    | 0.1843 | 0.1877   | 0.1818    | 0.1464  | 0.1536 | 0.1468 | 0.2317   | 0.2759   | 0.148  | 0.1486 | 0.1448 |    |
| 1.25 | 0.1867 | 0.1862   | 0.1836    | 0.1479  | 0.1542 | 0.1469 | 0.2328   | 0.2772   | 0.148  | 0.15   | 0.1453 |    |
| 1.5  | 0.188  | 0.186    | 0.1823    | 0.1476  | 0.1565 | 0.1485 | 0.2338   | 0.2754   | 0.1488 | 0.1511 | 0.1462 |    |
| 1.75 | 0.1903 | 0.1872   | 0.1822    | 0.1493  | 0.1564 | 0.1492 | 0.2356   | 0.2714   | 0.1495 | 0.1515 | 0.147  |    |
| 2    | 0.192  | 0.1886   | 0.1825    | 0.1512  | 0.1593 | 0.1507 | 0.2373   | 0.2704   | 0.1507 | 0.1538 | 0.149  |    |
| 2.25 | 0.1957 | 0.1907   | 0.183     | 0.1527  | 0.1615 | 0.1526 | 0.2359   | 0.2682   | 0.1526 | 0.1554 | 0.15   |    |
| 2.5  | 0.2004 | 0.1934   | 0.1852    | 0.1555  | 0.1635 | 0.1548 | 0.24     | 0.2796   | 0.1548 | 0.1577 | 0.1523 |    |
| 2.75 | 0.2037 | 0.1962   | 0.1859    | 0.1587  | 0.1675 | 0.1579 | 0.2407   | 0.2723   | 0.156  | 0.1604 | 0.154  |    |
| 3    | 0.2089 | 0.2008   | 0.1881    | 0.1608  | 0.1698 | 0.1601 | 0.2434   | 0.2748   | 0.1588 | 0.1632 | 0.1563 |    |
| 3.25 | 0.2141 | 0.2049   | 0.1915    | 0.1643  | 0.1733 | 0.1634 | 0.2465   | 0.2784   | 0.1609 | 0.1657 | 0.1589 |    |
| 3.5  | 0.2184 | 0.2094   | 0.1939    | 0.1669  | 0.1768 | 0.1664 | 0.2487   | 0.2784   | 0.1635 | 0.1694 | 0.1617 |    |
| 3.75 | 0.2248 | 0.2143   | 0.1968    | 0.1722  | 0.1813 | 0.1705 | 0.2518   | 0.2806   | 0.1665 | 0.1726 | 0.164  |    |
| 4    | 0.2306 | 0.2174   | 0.1995    | 0.1752  | 0.1862 | 0.1737 | 0.2561   | 0.2827   | 0.1699 | 0.176  | 0.1667 |    |
| 4.25 | 0.2378 | 0.2238   | 0.2034    | 0.1803  | 0.1915 | 0.1782 | 0.26     | 0.2849   | 0.1723 | 0.181  | 0.1695 |    |
| 4.5  | 0.2448 | 0.2295   | 0.2074    | 0.185   | 0.1973 | 0.1828 | 0.2649   | 0.2877   | 0.1773 | 0.1846 | 0.1724 |    |
| 4.75 | 0.2535 | 0.2362   | 0.2119    | 0.1903  | 0.2022 | 0.187  | 0.2697   | 0.2899   | 0.1807 | 0.1893 | 0.1756 |    |
| 5    | 0.2609 | 0.2431   | 0.2166    | 0.1965  | 0.2082 | 0.1928 | 0.274    | 0.2946   | 0.1843 | 0.1938 | 0.1797 |    |
| 5.25 | 0.2706 | 0.2502   | 0.2215    | 0.2035  | 0.2143 | 0.1985 | 0.2808   | 0.2981   | 0.1887 | 0.199  | 0.1825 |    |
| 5.5  | 0.279  | 0.2579   | 0.2282    | 0.2093  | 0.2221 | 0.2051 | 0.2856   | 0.3021   | 0.1944 | 0.2041 | 0.1859 |    |
| 5.75 | 0.2906 | 0.2668   | 0.2331    | 0.2163  | 0.2297 | 0.2102 | 0.2909   | 0.3051   | 0.199  | 0.2093 | 0.1898 |    |
| 6    | 0.3005 | 0.2752   | 0.2393    | 0.2244  | 0.2383 | 0.2168 | 0.2987   | 0.3093   | 0.205  | 0.2145 | 0.1934 |    |
| 6.25 | 0.3115 | 0.2844   | 0.2456    | 0.2317  | 0.2466 | 0.2231 | 0.3046   | 0.3128   | 0.2095 | 0.2203 | 0.197  |    |
| 6.5  | 0.3229 | 0.2943   | 0.2526    | 0.2411  | 0.2557 | 0.2308 | 0.3117   | 0.3174   | 0.2159 | 0.228  | 0.2006 |    |
| 6.75 | 0.3352 | 0.3045   | 0.2599    | 0.2491  | 0.2645 | 0.2374 | 0.3206   | 0.3217   | 0.2211 | 0.2337 | 0.2057 |    |
| 7    | 0.3463 | 0.3143   | 0.2686    | 0.2589  | 0.2753 | 0.2468 | 0.329    | 0.3263   | 0.2275 | 0.2406 | 0.2095 |    |
| 7.25 | 0.3591 | 0.3268   | 0.2761    | 0.2688  | 0.2859 | 0.2548 | 0.3381   | 0.3308   | 0.2337 | 0.2481 | 0.2138 |    |
| 7.5  | 0.3732 | 0.3388   | 0.2851    | 0.2801  | 0.2967 | 0.2629 | 0.3454   | 0.335    | 0.2423 | 0.2547 | 0.2186 |    |

|       |        |        |        |        |        |        |        |        |        |        |        |
|-------|--------|--------|--------|--------|--------|--------|--------|--------|--------|--------|--------|
| 7.75  | 0.3887 | 0.35   | 0.2949 | 0.2908 | 0.3076 | 0.2724 | 0.3554 | 0.3397 | 0.2492 | 0.2629 | 0.2233 |
| 8     | 0.4036 | 0.3629 | 0.3046 | 0.3019 | 0.319  | 0.2824 | 0.3654 | 0.3447 | 0.2573 | 0.2699 | 0.228  |
| 8.25  | 0.4219 | 0.3754 | 0.3143 | 0.314  | 0.3319 | 0.2925 | 0.3765 | 0.3485 | 0.2651 | 0.2775 | 0.2316 |
| 8.5   | 0.4422 | 0.3893 | 0.3245 | 0.3265 | 0.3458 | 0.3022 | 0.3882 | 0.3544 | 0.2744 | 0.2853 | 0.2368 |
| 8.75  | 0.4622 | 0.4037 | 0.3361 | 0.3407 | 0.3599 | 0.3121 | 0.4001 | 0.3601 | 0.2836 | 0.2953 | 0.2417 |
| 9     | 0.4835 | 0.4208 | 0.3492 | 0.3542 | 0.3755 | 0.3237 | 0.413  | 0.3641 | 0.2944 | 0.3038 | 0.2461 |
| 9.25  | 0.5065 | 0.4388 | 0.36   | 0.37   | 0.3926 | 0.3353 | 0.426  | 0.3706 | 0.3048 | 0.3131 | 0.2529 |
| 9.5   | 0.5309 | 0.457  | 0.3738 | 0.3873 | 0.4109 | 0.3466 | 0.441  | 0.3775 | 0.3143 | 0.3233 | 0.261  |
| 9.75  | 0.5562 | 0.4763 | 0.3865 | 0.4053 | 0.4298 | 0.3593 | 0.4557 | 0.3833 | 0.3253 | 0.333  | 0.2657 |
| 10    | 0.5829 | 0.4986 | 0.4011 | 0.4243 | 0.451  | 0.3735 | 0.4709 | 0.3899 | 0.336  | 0.3447 | 0.272  |
| 10.25 | 0.6122 | 0.5197 | 0.416  | 0.4459 | 0.4728 | 0.3867 | 0.4866 | 0.3958 | 0.3482 | 0.3548 | 0.2778 |
| 10.5  | 0.6397 | 0.5418 | 0.4316 | 0.4684 | 0.4952 | 0.4008 | 0.5028 | 0.4019 | 0.3604 | 0.3666 | 0.2839 |
| 10.75 | 0.6685 | 0.5593 | 0.4497 | 0.4926 | 0.5173 | 0.4175 | 0.5187 | 0.4063 | 0.3742 | 0.3777 | 0.2902 |
| 11    | 0.6992 | 0.5825 | 0.4678 | 0.5155 | 0.5439 | 0.4347 | 0.5359 | 0.4113 | 0.3869 | 0.3899 | 0.2966 |
| 11.25 | 0.7307 | 0.6075 | 0.4857 | 0.5412 | 0.5683 | 0.4495 | 0.5044 | 0.4191 | 0.4016 | 0.4007 | 0.3021 |
| 11.5  | 0.7614 | 0.6339 | 0.5059 | 0.5665 | 0.6062 | 0.467  | 0.5181 | 0.4163 | 0.4166 | 0.4133 | 0.3066 |
| 11.75 | 0.7927 | 0.6618 | 0.5242 | 0.5928 | 0.6305 | 0.4863 | 0.5375 | 0.4177 | 0.4326 | 0.4279 | 0.3121 |
| 12    | 0.8194 | 0.6889 | 0.5464 | 0.6186 | 0.6664 | 0.5104 | 0.5607 | 0.4248 | 0.448  | 0.4407 | 0.317  |
| 12.25 | 0.8459 | 0.7168 | 0.5622 | 0.6482 | 0.7    | 0.538  | 0.5873 | 0.4327 | 0.4676 | 0.4528 | 0.3236 |
| 12.5  | 0.8706 | 0.7448 | 0.5743 | 0.6718 | 0.7259 | 0.5618 | 0.6148 | 0.4427 | 0.4869 | 0.4694 | 0.3299 |
| 12.75 | 0.8904 | 0.7744 | 0.5968 | 0.6958 | 0.7539 | 0.5824 | 0.6392 | 0.4543 | 0.5088 | 0.4839 | 0.3376 |
| 13    | 0.9099 | 0.7982 | 0.6186 | 0.7183 | 0.8039 | 0.6064 | 0.6642 | 0.4681 | 0.5342 | 0.5013 | 0.347  |
| 13.25 | 0.9301 | 0.8269 | 0.6426 | 0.7417 | 0.8315 | 0.6289 | 0.6883 | 0.4827 | 0.5624 | 0.5196 | 0.3614 |
| 13.5  | 0.9508 | 0.849  | 0.6665 | 0.762  | 0.8518 | 0.6515 | 0.7085 | 0.4973 | 0.5931 | 0.551  | 0.385  |
| 13.75 | 0.9679 | 0.8707 | 0.6913 | 0.7829 | 0.8771 | 0.6728 | 0.7307 | 0.5101 | 0.6267 | 0.5837 | 0.3885 |
| 14    | 0.986  | 0.8918 | 0.7152 | 0.8023 | 0.9023 | 0.6977 | 0.7506 | 0.5206 | 0.6488 | 0.6006 | 0.3965 |
| 14.25 | 1.0047 | 0.9106 | 0.7372 | 0.8211 | 0.9243 | 0.7194 | 0.7697 | 0.5279 | 0.6728 | 0.6173 | 0.404  |
| 14.5  | 1.0233 | 0.9308 | 0.7608 | 0.8402 | 0.9471 | 0.7403 | 0.7865 | 0.5375 | 0.6962 | 0.6344 | 0.4119 |
| 14.75 | 1.0397 | 0.9491 | 0.7825 | 0.8604 | 0.9676 | 0.7647 | 0.8068 | 0.5459 | 0.7193 | 0.654  | 0.4199 |
| 15    | 1.0577 | 0.966  | 0.8057 | 0.8792 | 0.988  | 0.7851 | 0.8259 | 0.5564 | 0.7414 | 0.6709 | 0.4295 |
| 15.25 | 1.0753 | 0.9853 | 0.8251 | 0.896  | 1.002  | 0.8075 | 0.8436 | 0.566  | 0.7639 | 0.6913 | 0.4374 |
| 15.5  | 1.0897 | 1.0015 | 0.8439 | 0.9144 | 1.0212 | 0.8272 | 0.8621 | 0.5772 | 0.7847 | 0.7098 | 0.4461 |
| 15.75 | 1.1049 | 1.0198 | 0.8628 | 0.9299 | 1.0376 | 0.8495 | 0.8797 | 0.5863 | 0.8066 | 0.7273 | 0.4547 |
| 16    | 1.1171 | 1.031  | 0.8817 | 0.9444 | 1.0812 | 0.8486 | 0.8794 | 0.5819 | 0.8063 | 0.723  | 0.4567 |
| 16.25 | 1.1316 | 1.0487 | 0.8996 | 0.958  | 1.0797 | 0.8496 | 0.8767 | 0.5739 | 0.8062 | 0.7244 | 0.4538 |
| 16.5  | 1.1443 | 1.0637 | 0.9165 | 0.9714 | 1.0973 | 0.8693 | 0.8974 | 0.5837 | 0.8255 | 0.7391 | 0.4617 |
| 16.75 | 1.1579 | 1.0806 | 0.9342 | 0.9855 | 1.1173 | 0.8861 | 0.9182 | 0.5934 | 0.8452 | 0.7565 | 0.4713 |
| 17    | 1.1715 | 1.0952 | 0.9517 | 0.9984 | 1.1006 | 0.9036 | 0.9358 | 0.603  | 0.8641 | 0.7733 | 0.4806 |
| 17.25 | 1.1858 | 1.1114 | 0.9682 | 1.0124 | 1.1111 | 0.9198 | 0.9518 | 0.6124 | 0.8809 | 0.7886 | 0.4876 |
| 17.5  | 1.2004 | 1.1256 | 0.9855 | 1.0256 | 1.1142 | 0.9344 | 0.9693 | 0.6221 | 0.8972 | 0.8024 | 0.4958 |
| 17.75 | 1.2123 | 1.1388 | 1.0016 | 1.0375 | 1.1155 | 0.9492 | 0.9857 | 0.6296 | 0.913  | 0.8176 | 0.5036 |
| 18    | 1.2261 | 1.1522 | 1.015  | 1.0502 | 1.1151 | 0.9646 | 1.0007 | 0.6382 | 0.9289 | 0.8306 | 0.5129 |

|       |        |        |        |        |        |        |        |        |        |        |        |
|-------|--------|--------|--------|--------|--------|--------|--------|--------|--------|--------|--------|
| 18.25 | 1.239  | 1.1664 | 1.0307 | 1.0629 | 1.1627 | 0.9774 | 1.0164 | 0.6469 | 0.944  | 0.8444 | 0.5198 |
| 18.5  | 1.251  | 1.1779 | 1.0478 | 1.0765 | 1.1584 | 0.9919 | 1.0334 | 0.6573 | 0.9589 | 0.857  | 0.5287 |
| 18.75 | 1.2641 | 1.1907 | 1.0607 | 1.0876 | 1.1615 | 1.0037 | 1.0493 | 0.6652 | 0.9732 | 0.8696 | 0.536  |
| 19    | 1.2773 | 1.2018 | 1.0765 | 1.0974 | 1.1683 | 1.0158 | 1.0632 | 0.6752 | 0.9855 | 0.8805 | 0.5443 |
| 19.25 | 1.2907 | 1.2145 | 1.0891 | 1.1101 | 1.1942 | 1.0294 | 1.0785 | 0.6826 | 0.9992 | 0.8926 | 0.5521 |
| 19.5  | 1.3032 | 1.2259 | 1.1041 | 1.1208 | 1.2056 | 1.0419 | 1.0923 | 0.6924 | 1.0119 | 0.9046 | 0.56   |
| 19.75 | 1.3141 | 1.239  | 1.1166 | 1.1308 | 1.2056 | 1.0528 | 1.1086 | 0.7011 | 1.0268 | 0.9149 | 0.5681 |
| 20    | 1.3251 | 1.2497 | 1.1283 | 1.1416 | 1.2184 | 1.0662 | 1.1217 | 0.711  | 1.0376 | 0.9253 | 0.5776 |
| 20.25 | 1.3374 | 1.2637 | 1.1419 | 1.1522 | 1.2215 | 1.0775 | 1.1355 | 0.7191 | 1.0507 | 0.9355 | 0.5838 |
| 20.5  | 1.3474 | 1.2743 | 1.1521 | 1.1615 | 1.2327 | 1.0886 | 1.1499 | 0.7291 | 1.0634 | 0.9463 | 0.5927 |
| 20.75 | 1.3589 | 1.2848 | 1.1637 | 1.173  | 1.2616 | 1.0978 | 1.1635 | 0.7384 | 1.0743 | 0.955  | 0.6003 |
| 21    | 1.3704 | 1.2956 | 1.1744 | 1.1823 | 1.2697 | 1.1076 | 1.1769 | 0.7457 | 1.0858 | 0.9651 | 0.609  |
| 21.25 | 1.3806 | 1.3083 | 1.1829 | 1.191  | 1.2806 | 1.1186 | 1.189  | 0.7551 | 1.096  | 0.9724 | 0.6173 |
| 21.5  | 1.39   | 1.3184 | 1.1906 | 1.1999 | 1.2855 | 1.1277 | 1.1998 | 0.7644 | 1.1074 | 0.9823 | 0.623  |
| 21.75 | 1.3999 | 1.3289 | 1.2037 | 1.2098 | 1.2884 | 1.1391 | 1.2135 | 0.774  | 1.1188 | 0.9909 | 0.6303 |
| 22    | 1.4093 | 1.3395 | 1.2116 | 1.218  | 1.2972 | 1.147  | 1.2249 | 0.7828 | 1.1277 | 1.0009 | 0.6373 |
| 22.25 | 1.4189 | 1.3493 | 1.2223 | 1.2267 | 1.3038 | 1.1576 | 1.2367 | 0.7909 | 1.1384 | 1.0087 | 0.6451 |
| 22.5  | 1.4278 | 1.3589 | 1.2316 | 1.2354 | 1.3115 | 1.1663 | 1.2487 | 0.8002 | 1.1481 | 1.0179 | 0.6521 |
| 22.75 | 1.4356 | 1.369  | 1.2391 | 1.2419 | 1.3206 | 1.1764 | 1.2604 | 0.8089 | 1.1589 | 1.0259 | 0.66   |
| 23    | 1.4425 | 1.3781 | 1.2485 | 1.2506 | 1.3277 | 1.1849 | 1.2712 | 0.8186 | 1.1685 | 1.0353 | 0.6656 |
| 23.25 | 1.4488 | 1.3861 | 1.257  | 1.2576 | 1.3344 | 1.1955 | 1.2796 | 0.8277 | 1.1766 | 1.0418 | 0.673  |
| 23.5  | 1.4527 | 1.3947 | 1.2667 | 1.264  | 1.3403 | 1.2008 | 1.2915 | 0.8358 | 1.1844 | 1.0509 | 0.6782 |
| 23.75 | 1.4559 | 1.4037 | 1.2752 | 1.2693 | 1.3452 | 1.2099 | 1.3006 | 0.8457 | 1.1943 | 1.0584 | 0.6853 |
| 24    | 1.4583 | 1.4119 | 1.2845 | 1.2751 | 1.3507 | 1.2188 | 1.3124 | 0.8549 | 1.202  | 1.0666 | 0.6914 |
| 24.25 | 1.4609 | 1.4188 | 1.2937 | 1.2811 | 1.3565 | 1.2282 | 1.3205 | 0.864  | 1.2102 | 1.0763 | 0.697  |
| 24.5  | 1.4615 | 1.4276 | 1.3014 | 1.2831 | 1.3609 | 1.2355 | 1.3294 | 0.8736 | 1.2203 | 1.084  | 0.7028 |
| 24.75 | 1.4635 | 1.4341 | 1.3101 | 1.2891 | 1.3653 | 1.2404 | 1.3387 | 0.8831 | 1.227  | 1.0911 | 0.7091 |
| 25    | 1.466  | 1.4379 | 1.3177 | 1.2917 | 1.3683 | 1.2483 | 1.3469 | 0.8913 | 1.2361 | 1.0993 | 0.7131 |
| 25.25 | 1.4669 | 1.4431 | 1.3269 | 1.2958 | 1.371  | 1.2562 | 1.3543 | 0.9009 | 1.2447 | 1.1064 | 0.7203 |
| 25.5  | 1.4687 | 1.4476 | 1.3358 | 1.2994 | 1.3736 | 1.2634 | 1.3609 | 0.9095 | 1.2541 | 1.1155 | 0.7256 |
| 25.75 | 1.4687 | 1.4518 | 1.345  | 1.2997 | 1.3753 | 1.2701 | 1.3685 | 0.9182 | 1.2605 | 1.1228 | 0.7311 |
| 26    | 1.4682 | 1.453  | 1.3526 | 1.3012 | 1.3783 | 1.2761 | 1.3753 | 0.9286 | 1.2673 | 1.1316 | 0.7372 |
| 26.25 | 1.4704 | 1.4557 | 1.3577 | 1.3027 | 1.3778 | 1.2823 | 1.381  | 0.9378 | 1.2769 | 1.1382 | 0.7431 |
| 26.5  | 1.4702 | 1.4595 | 1.368  | 1.3014 | 1.3783 | 1.2878 | 1.3855 | 0.9464 | 1.2857 | 1.1462 | 0.7475 |
| 26.75 | 1.4706 | 1.4619 | 1.3756 | 1.3009 | 1.3799 | 1.2937 | 1.3897 | 0.955  | 1.2912 | 1.1518 | 0.7528 |
| 27    | 1.4716 | 1.4639 | 1.3808 | 1.3012 | 1.3795 | 1.2995 | 1.3941 | 0.9638 | 1.2973 | 1.1625 | 0.7572 |
| 27.25 | 1.4725 | 1.4677 | 1.3894 | 1.3005 | 1.3791 | 1.3046 | 1.3985 | 0.9737 | 1.3056 | 1.1717 | 0.7641 |
| 27.5  | 1.473  | 1.4709 | 1.396  | 1.3002 | 1.3801 | 1.3093 | 1.3994 | 0.9826 | 1.3109 | 1.1786 | 0.7684 |
| 27.75 | 1.4747 | 1.4735 | 1.4025 | 1.3004 | 1.3806 | 1.3138 | 1.4012 | 0.9926 | 1.3166 | 1.1874 | 0.7737 |
| 28    | 1.4747 | 1.4758 | 1.4095 | 1.3    | 1.3803 | 1.3184 | 1.4011 | 1.002  | 1.3213 | 1.1933 | 0.7802 |
| 28.25 | 1.4772 | 1.4784 | 1.4156 | 1.2993 | 1.3812 | 1.3209 | 1.4014 | 1.0107 | 1.3264 | 1.2019 | 0.7838 |
| 28.5  | 1.4758 | 1.4806 | 1.4201 | 1.2999 | 1.3831 | 1.3256 | 1.4004 | 1.0192 | 1.3329 | 1.2098 | 0.7904 |

|       |        |        |        |        |        |        |        |        |        |        |        |
|-------|--------|--------|--------|--------|--------|--------|--------|--------|--------|--------|--------|
| 28.75 | 1.4763 | 1.4813 | 1.4239 | 1.2986 | 1.3826 | 1.3263 | 1.4002 | 1.0277 | 1.3364 | 1.2156 | 0.7942 |
| 29    | 1.4771 | 1.4829 | 1.4289 | 1.2998 | 1.3828 | 1.3287 | 1.3988 | 1.0374 | 1.3413 | 1.2235 | 0.8009 |
| 29.25 | 1.4786 | 1.485  | 1.4341 | 1.2974 | 1.3855 | 1.3306 | 1.3981 | 1.0458 | 1.3471 | 1.2302 | 0.8057 |
| 29.5  | 1.4803 | 1.4861 | 1.4367 | 1.2977 | 1.3854 | 1.3331 | 1.3985 | 1.0565 | 1.3506 | 1.2359 | 0.812  |
| 29.75 | 1.4807 | 1.4866 | 1.4387 | 1.2984 | 1.3848 | 1.3322 | 1.399  | 1.0648 | 1.3542 | 1.2459 | 0.8175 |
| 30    | 1.4823 | 1.4892 | 1.4412 | 1.2965 | 1.3876 | 1.3349 | 1.3983 | 1.0743 | 1.3567 | 1.2507 | 0.8221 |
| 30.25 | 1.4831 | 1.49   | 1.4444 | 1.2961 | 1.3883 | 1.3359 | 1.3995 | 1.0838 | 1.3608 | 1.2587 | 0.829  |
| 30.5  | 1.4829 | 1.4913 | 1.4444 | 1.2951 | 1.3896 | 1.3339 | 1.3986 | 1.0911 | 1.3622 | 1.2632 | 0.834  |
| 30.75 | 1.4823 | 1.4923 | 1.4446 | 1.2945 | 1.3899 | 1.333  | 1.3995 | 1.0999 | 1.3641 | 1.271  | 0.8398 |
| 31    | 1.4825 | 1.4929 | 1.4466 | 1.2948 | 1.3915 | 1.3336 | 1.4004 | 1.1074 | 1.3636 | 1.2758 | 0.8453 |
| 31.25 | 1.4843 | 1.4939 | 1.448  | 1.293  | 1.3932 | 1.3341 | 1.4012 | 1.1165 | 1.3651 | 1.2841 | 0.8503 |
| 31.5  | 1.4842 | 1.496  | 1.4475 | 1.2948 | 1.3941 | 1.3335 | 1.4022 | 1.1242 | 1.3649 | 1.288  | 0.8563 |
| 31.75 | 1.4837 | 1.4956 | 1.4475 | 1.293  | 1.3943 | 1.3332 | 1.4017 | 1.133  | 1.3654 | 1.2956 | 0.8609 |
| 32    | 1.4837 | 1.4964 | 1.4488 | 1.293  | 1.3966 | 1.334  | 1.4024 | 1.1416 | 1.3646 | 1.3    | 0.8666 |
| 32.25 | 1.4847 | 1.4969 | 1.4483 | 1.2923 | 1.397  | 1.3338 | 1.4026 | 1.1484 | 1.3642 | 1.3038 | 0.8704 |
| 32.5  | 1.4848 | 1.4964 | 1.448  | 1.2926 | 1.3979 | 1.3337 | 1.4025 | 1.1553 | 1.3635 | 1.3103 | 0.8769 |
| 32.75 | 1.4858 | 1.4974 | 1.448  | 1.2927 | 1.3983 | 1.3343 | 1.4026 | 1.1634 | 1.3624 | 1.3154 | 0.8821 |
| 33    | 1.4867 | 1.4992 | 1.4467 | 1.2931 | 1.3988 | 1.3356 | 1.4028 | 1.1725 | 1.3611 | 1.3224 | 0.8877 |
| 33.25 | 1.4876 | 1.498  | 1.4476 | 1.2919 | 1.4004 | 1.3361 | 1.4034 | 1.181  | 1.36   | 1.326  | 0.8921 |
| 33.5  | 1.4885 | 1.4993 | 1.4481 | 1.2911 | 1.401  | 1.3372 | 1.4019 | 1.1885 | 1.3598 | 1.3321 | 0.8969 |
| 33.75 | 1.4883 | 1.4994 | 1.4469 | 1.2898 | 1.4019 | 1.3372 | 1.4013 | 1.1961 | 1.3589 | 1.3362 | 0.9028 |
| 34    | 1.4888 | 1.4988 | 1.4474 | 1.2899 | 1.4024 | 1.3391 | 1.4004 | 1.2041 | 1.3582 | 1.3413 | 0.9089 |
| 34.25 | 1.4892 | 1.4995 | 1.4471 | 1.2895 | 1.4028 | 1.3383 | 1.4031 | 1.2112 | 1.3584 | 1.3479 | 0.914  |
| 34.5  | 1.4899 | 1.4996 | 1.4474 | 1.2891 | 1.404  | 1.3408 | 1.4015 | 1.2205 | 1.3579 | 1.3513 | 0.9192 |
| 34.75 | 1.4919 | 1.5003 | 1.4472 | 1.2887 | 1.4049 | 1.3406 | 1.4031 | 1.2269 | 1.3575 | 1.3577 | 0.9234 |
| 35    | 1.492  | 1.5014 | 1.4486 | 1.2893 | 1.4053 | 1.3421 | 1.4026 | 1.2337 | 1.36   | 1.361  | 0.9301 |
| 35.25 | 1.4922 | 1.502  | 1.4486 | 1.288  | 1.4058 | 1.3427 | 1.4032 | 1.2426 | 1.359  | 1.3653 | 0.9366 |
| 35.5  | 1.4933 | 1.5004 | 1.4477 | 1.2892 | 1.4077 | 1.3435 | 1.4018 | 1.2473 | 1.3593 | 1.3708 | 0.94   |
| 35.75 | 1.4939 | 1.5019 | 1.4479 | 1.2895 | 1.408  | 1.3441 | 1.4027 | 1.256  | 1.3604 | 1.3737 | 0.9464 |
| 36    | 1.4951 | 1.5018 | 1.4476 | 1.2881 | 1.4073 | 1.3449 | 1.4018 | 1.2621 | 1.3593 | 1.378  | 0.9516 |
| 36.25 | 1.4965 | 1.5015 | 1.4469 | 1.2885 | 1.4081 | 1.3452 | 1.4026 | 1.2701 | 1.3607 | 1.382  | 0.9586 |
| 36.5  | 1.4976 | 1.5021 | 1.4473 | 1.2883 | 1.4098 | 1.3457 | 1.402  | 1.2765 | 1.3615 | 1.3857 | 0.9627 |
| 36.75 | 1.4983 | 1.5037 | 1.4481 | 1.2885 | 1.4113 | 1.3487 | 1.4043 | 1.2838 | 1.3631 | 1.39   | 0.9711 |
| 37    | 1.4992 | 1.5034 | 1.4477 | 1.2872 | 1.411  | 1.3474 | 1.4032 | 1.2883 | 1.3621 | 1.3905 | 0.9749 |
| 37.25 | 1.4997 | 1.504  | 1.449  | 1.2883 | 1.4108 | 1.3489 | 1.403  | 1.2934 | 1.3622 | 1.3908 | 0.9799 |
| 37.5  | 1.5011 | 1.5037 | 1.4489 | 1.2872 | 1.4117 | 1.3492 | 1.4029 | 1.2976 | 1.3627 | 1.3922 | 0.9856 |
| 37.75 | 1.502  | 1.505  | 1.4486 | 1.2856 | 1.4117 | 1.3492 | 1.4026 | 1.3009 | 1.3617 | 1.3933 | 0.9895 |
| 38    | 1.5029 | 1.5047 | 1.4475 | 1.2864 | 1.4134 | 1.3496 | 1.4035 | 1.3074 | 1.3625 | 1.3933 | 0.9968 |
| 38.25 | 1.5029 | 1.5046 | 1.449  | 1.2868 | 1.4126 | 1.3497 | 1.4032 | 1.3096 | 1.3622 | 1.3938 | 1.0014 |
| 38.5  | 1.504  | 1.505  | 1.4481 | 1.2856 | 1.4126 | 1.3491 | 1.4031 | 1.3139 | 1.3632 | 1.3944 | 1.0056 |
| 38.75 | 1.5035 | 1.5042 | 1.448  | 1.2861 | 1.4138 | 1.3497 | 1.4041 | 1.316  | 1.362  | 1.3936 | 1.011  |
| 39    | 1.5042 | 1.505  | 1.4488 | 1.2859 | 1.4126 | 1.3501 | 1.4035 | 1.318  | 1.3624 | 1.3938 | 1.0164 |

|       |        |        |        |        |        |        |        |        |        |        |        |
|-------|--------|--------|--------|--------|--------|--------|--------|--------|--------|--------|--------|
| 39.25 | 1.5058 | 1.5049 | 1.4482 | 1.2852 | 1.4133 | 1.3515 | 1.4043 | 1.3207 | 1.3616 | 1.3946 | 1.0215 |
| 39.5  | 1.507  | 1.5052 | 1.4485 | 1.286  | 1.4144 | 1.3509 | 1.4043 | 1.3205 | 1.361  | 1.3944 | 1.0274 |
| 39.75 | 1.5073 | 1.506  | 1.4484 | 1.2856 | 1.4152 | 1.3518 | 1.405  | 1.3211 | 1.3621 | 1.3947 | 1.0307 |
| 40    | 1.5077 | 1.5062 | 1.4489 | 1.2856 | 1.4151 | 1.3533 | 1.4047 | 1.3205 | 1.3621 | 1.3962 | 1.0372 |
| 40.25 | 1.5093 | 1.5063 | 1.4496 | 1.2855 | 1.4167 | 1.3533 | 1.4065 | 1.3215 | 1.3615 | 1.3971 | 1.0417 |
| 40.5  | 1.5096 | 1.506  | 1.4489 | 1.2858 | 1.4162 | 1.3535 | 1.4064 | 1.3198 | 1.3621 | 1.396  | 1.0459 |
| 40.75 | 1.5108 | 1.5059 | 1.4494 | 1.2861 | 1.4158 | 1.3535 | 1.4064 | 1.3188 | 1.3612 | 1.3953 | 1.0511 |
| 41    | 1.5129 | 1.5053 | 1.4485 | 1.2863 | 1.4161 | 1.3549 | 1.4066 | 1.3185 | 1.3611 | 1.3954 | 1.0565 |
| 41.25 | 1.5127 | 1.5048 | 1.4491 | 1.286  | 1.4173 | 1.3542 | 1.4065 | 1.3187 | 1.3615 | 1.3959 | 1.0624 |
| 41.5  | 1.513  | 1.5052 | 1.4495 | 1.2857 | 1.4173 | 1.3564 | 1.4057 | 1.3171 | 1.3621 | 1.3956 | 1.0672 |
| 41.75 | 1.513  | 1.5045 | 1.4496 | 1.2855 | 1.4171 | 1.3557 | 1.4062 | 1.3171 | 1.3609 | 1.3965 | 1.0713 |
| 42    | 1.5143 | 1.506  | 1.4492 | 1.2859 | 1.4169 | 1.3557 | 1.4067 | 1.318  | 1.3615 | 1.3972 | 1.0759 |
| 42.25 | 1.5164 | 1.506  | 1.4512 | 1.2863 | 1.419  | 1.3564 | 1.4073 | 1.3185 | 1.3618 | 1.3968 | 1.083  |
| 42.5  | 1.5166 | 1.5062 | 1.4516 | 1.2868 | 1.4182 | 1.3572 | 1.4079 | 1.3196 | 1.3613 | 1.397  | 1.0876 |
| 42.75 | 1.518  | 1.506  | 1.4518 | 1.285  | 1.4189 | 1.3574 | 1.4088 | 1.3184 | 1.3617 | 1.3984 | 1.092  |
| 43    | 1.5154 | 1.5053 | 1.4522 | 1.2855 | 1.4194 | 1.3575 | 1.4095 | 1.3199 | 1.3624 | 1.3991 | 1.0972 |
| 43.25 | 1.5129 | 1.5059 | 1.4522 | 1.2871 | 1.4193 | 1.3583 | 1.4086 | 1.3197 | 1.3618 | 1.3986 | 1.1033 |
| 43.5  | 1.5111 | 1.5064 | 1.4527 | 1.2868 | 1.4205 | 1.3579 | 1.4099 | 1.3196 | 1.3621 | 1.3992 | 1.1068 |
| 43.75 | 1.5114 | 1.5084 | 1.453  | 1.2867 | 1.4215 | 1.3597 | 1.4095 | 1.3216 | 1.3614 | 1.4009 | 1.1126 |
| 44    | 1.5125 | 1.5078 | 1.4529 | 1.2879 | 1.4234 | 1.3591 | 1.4113 | 1.3211 | 1.3632 | 1.4004 | 1.116  |
| 44.25 | 1.5102 | 1.5073 | 1.4529 | 1.2864 | 1.4222 | 1.3604 | 1.4118 | 1.3218 | 1.3637 | 1.4005 | 1.1232 |
| 44.5  | 1.5105 | 1.5065 | 1.4523 | 1.2866 | 1.4226 | 1.3587 | 1.4128 | 1.3217 | 1.3631 | 1.4006 | 1.1279 |
| 44.75 | 1.5104 | 1.5065 | 1.454  | 1.2861 | 1.4228 | 1.3579 | 1.4134 | 1.3226 | 1.3643 | 1.4018 | 1.1316 |
| 45    | 1.5092 | 1.5064 | 1.4543 | 1.2866 | 1.4225 | 1.3589 | 1.4143 | 1.3234 | 1.3639 | 1.4018 | 1.1389 |
| 45.25 | 1.5105 | 1.5057 | 1.4541 | 1.2863 | 1.423  | 1.3599 | 1.4142 | 1.3239 | 1.3637 | 1.4023 | 1.1412 |
| 45.5  | 1.5103 | 1.5065 | 1.4557 | 1.2865 | 1.4229 | 1.3595 | 1.4142 | 1.3243 | 1.3648 | 1.4025 | 1.1471 |
| 45.75 | 1.51   | 1.5067 | 1.4559 | 1.2864 | 1.4227 | 1.359  | 1.4144 | 1.3243 | 1.3649 | 1.4014 | 1.1509 |
| 46    | 1.5108 | 1.5061 | 1.4561 | 1.2869 | 1.4244 | 1.3603 | 1.4149 | 1.3268 | 1.3657 | 1.4036 | 1.156  |
| 46.25 | 1.5109 | 1.5064 | 1.456  | 1.2881 | 1.4238 | 1.3599 | 1.4144 | 1.3268 | 1.364  | 1.4035 | 1.1598 |
| 46.5  | 1.511  | 1.5069 | 1.4571 | 1.288  | 1.4251 | 1.3606 | 1.416  | 1.3278 | 1.3642 | 1.4036 | 1.1635 |
| 46.75 | 1.511  | 1.5052 | 1.4577 | 1.2887 | 1.4237 | 1.3608 | 1.415  | 1.328  | 1.364  | 1.4042 | 1.1678 |
| 47    | 1.5111 | 1.5059 | 1.4574 | 1.2882 | 1.4244 | 1.3611 | 1.4163 | 1.3284 | 1.365  | 1.4037 | 1.1737 |
| 47.25 | 1.5102 | 1.5042 | 1.4571 | 1.2871 | 1.4245 | 1.36   | 1.4159 | 1.3293 | 1.3649 | 1.4061 | 1.1756 |
| 47.5  | 1.5112 | 1.5044 | 1.4583 | 1.2876 | 1.424  | 1.362  | 1.4167 | 1.3301 | 1.3648 | 1.4045 | 1.1807 |
| 47.75 | 1.5109 | 1.5036 | 1.4575 | 1.2886 | 1.4238 | 1.3607 | 1.4165 | 1.3301 | 1.3648 | 1.4055 | 1.1851 |
| 48    | 1.511  | 1.5046 | 1.4582 | 1.2884 | 1.4251 | 1.3622 | 1.4171 | 1.331  | 1.3647 | 1.4049 | 1.19   |
| 48.25 | 1.511  | 1.5042 | 1.4587 | 1.289  | 1.424  | 1.3608 | 1.4168 | 1.3312 | 1.3648 | 1.4049 | 1.1921 |
| 48.5  | 1.5111 | 1.504  | 1.4592 | 1.2878 | 1.4244 | 1.3617 | 1.4172 | 1.3311 | 1.3649 | 1.4059 | 1.1959 |
| 48.75 | 1.5107 | 1.5019 | 1.4578 | 1.2888 | 1.4245 | 1.3618 | 1.4169 | 1.3323 | 1.3638 | 1.4048 | 1.2005 |
| 49    | 1.5112 | 1.5026 | 1.4586 | 1.2901 | 1.4255 | 1.3612 | 1.418  | 1.3326 | 1.3641 | 1.4059 | 1.2035 |
| 49.25 | 1.5109 | 1.5034 | 1.4604 | 1.2898 | 1.4248 | 1.3626 | 1.4183 | 1.3344 | 1.3634 | 1.4058 | 1.2078 |
| 49.5  | 1.5094 | 1.504  | 1.4603 | 1.2891 | 1.4249 | 1.3632 | 1.4193 | 1.335  | 1.365  | 1.4048 | 1.2113 |



49.75 1.5105 1.5038 1.4602 1.2886 1.424 1.3612 1.4197 1.3345 1.3638 1.4068 1.2154

L9 L10 L11 L12 L13 L14 L15 L16

| TIME | WT     | WT(GA 3) | WT(RAD 3) | NO DRUG | GA 3uM | GA 7uM | NOVO 10 | NOVO 25 | RAD 3  | RAD 10 | RAD 30 |
|------|--------|----------|-----------|---------|--------|--------|---------|---------|--------|--------|--------|
| 0    | 0.1894 | 0.2051   | 0.1892    | 0.1755  | 0.1676 | 0.1721 | 0.2125  | 0.3588  | 0.163  | 0.1681 | 0.1683 |
| 0.25 | 0.1844 | 0.1929   | 0.1812    | 0.1619  | 0.1571 | 0.1612 | 0.2161  | 0.3461  | 0.1523 | 0.1564 | 0.1579 |
| 0.5  | 0.1833 | 0.1912   | 0.1787    | 0.1595  | 0.1544 | 0.1587 | 0.2136  | 0.3386  | 0.1466 | 0.1534 | 0.1551 |
| 0.75 | 0.1838 | 0.189    | 0.1758    | 0.1579  | 0.1521 | 0.1568 | 0.2138  | 0.3282  | 0.1458 | 0.1517 | 0.1536 |
| 1    | 0.1843 | 0.1877   | 0.1818    | 0.1578  | 0.1522 | 0.1564 | 0.2133  | 0.3223  | 0.145  | 0.1507 | 0.1533 |
| 1.25 | 0.1867 | 0.1862   | 0.1836    | 0.158   | 0.1526 | 0.157  | 0.2125  | 0.3112  | 0.1451 | 0.1511 | 0.1533 |
| 1.5  | 0.188  | 0.186    | 0.1823    | 0.1577  | 0.1528 | 0.1562 | 0.2111  | 0.3055  | 0.1448 | 0.1514 | 0.1534 |
| 1.75 | 0.1903 | 0.1872   | 0.1822    | 0.1583  | 0.1535 | 0.1572 | 0.2126  | 0.2975  | 0.1458 | 0.1515 | 0.1532 |

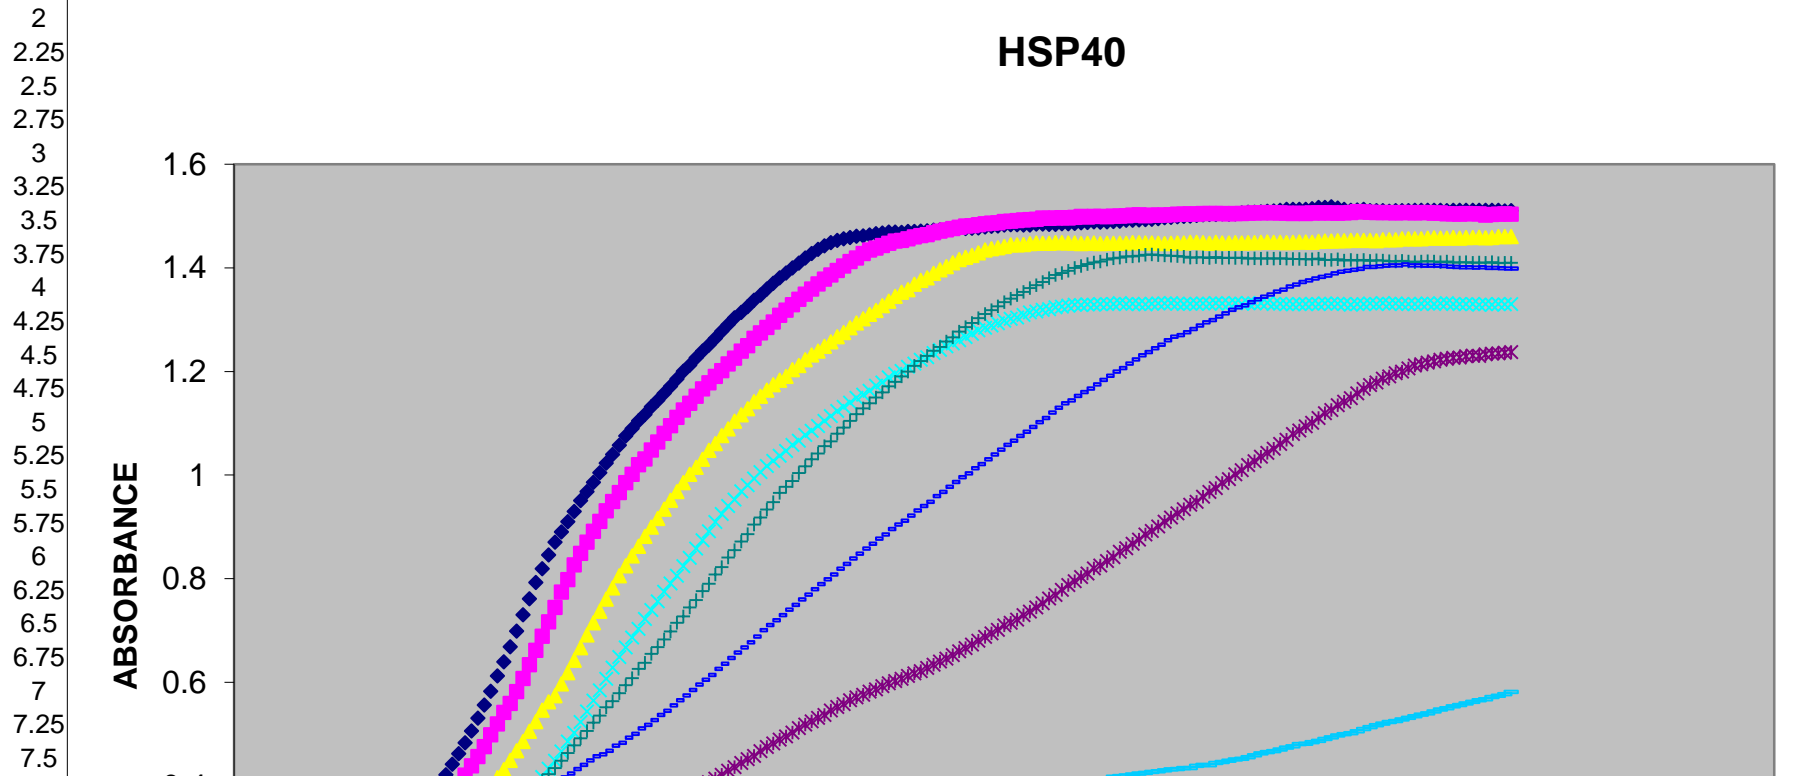

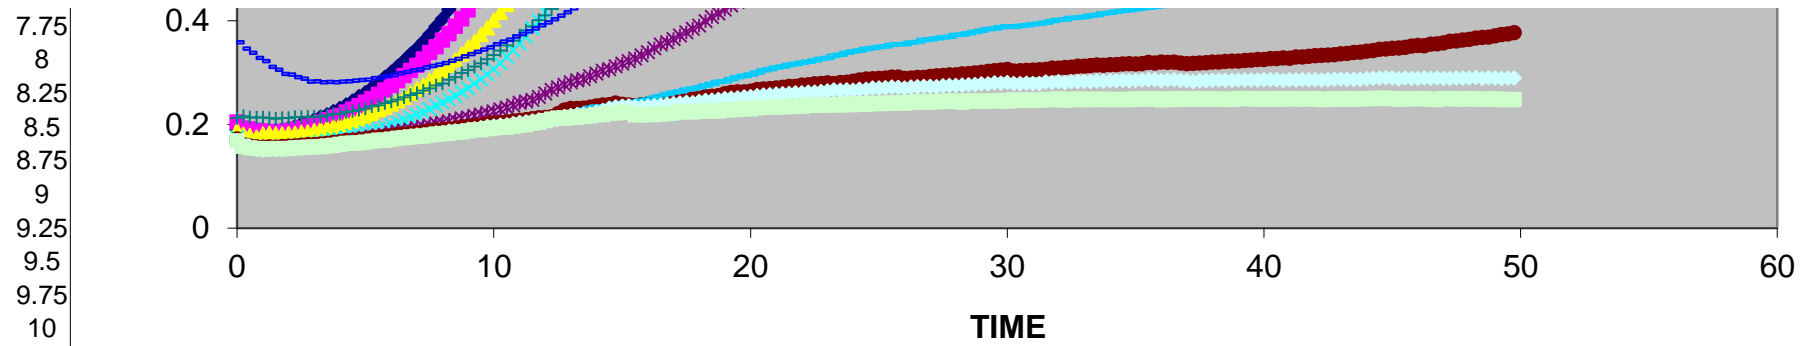

|       |        |        |        |        |        |        |        |        |        |        |        |
|-------|--------|--------|--------|--------|--------|--------|--------|--------|--------|--------|--------|
| 10.5  | 0.6597 | 0.5418 | 0.4518 | 0.3507 | 0.2528 | 0.2049 | 0.3527 | 0.3657 | 0.1955 | 0.1998 | 0.1955 |
| 10.75 | 0.6685 | 0.5593 | 0.4497 | 0.343  | 0.2368 | 0.207  | 0.3615 | 0.3696 | 0.1981 | 0.2017 | 0.197  |
| 11    | 0.6992 | 0.5825 | 0.4678 | 0.3561 | 0.2419 | 0.2081 | 0.3719 | 0.3746 | 0.2004 | 0.2039 | 0.1989 |
| 11.25 | 0.7307 | 0.6075 | 0.4857 | 0.3694 | 0.2444 | 0.209  | 0.3816 | 0.3799 | 0.2021 | 0.2048 | 0.1999 |
| 11.5  | 0.7614 | 0.6339 | 0.5059 | 0.3857 | 0.2473 | 0.2108 | 0.3892 | 0.3852 | 0.2047 | 0.207  | 0.2022 |
| 11.75 | 0.7927 | 0.6618 | 0.5242 | 0.4002 | 0.2529 | 0.2131 | 0.4012 | 0.3915 | 0.2065 | 0.2084 | 0.2043 |
| 12    | 0.8194 | 0.6889 | 0.5464 | 0.4172 | 0.26   | 0.2135 | 0.4105 | 0.3969 | 0.2091 | 0.2101 | 0.2074 |
| 12.25 | 0.8459 | 0.7168 | 0.5622 | 0.4333 | 0.2668 | 0.2147 | 0.423  | 0.403  | 0.2115 | 0.2122 | 0.2104 |
| 12.5  | 0.8706 | 0.7448 | 0.5743 | 0.449  | 0.2717 | 0.2208 | 0.4347 | 0.4098 | 0.2134 | 0.2137 | 0.2125 |
| 12.75 | 0.8904 | 0.7744 | 0.5968 | 0.4665 | 0.2764 | 0.228  | 0.4489 | 0.417  | 0.2156 | 0.2153 | 0.2125 |
| 13    | 0.9099 | 0.7982 | 0.6186 | 0.4858 | 0.2812 | 0.2308 | 0.4634 | 0.4242 | 0.2189 | 0.2175 | 0.2134 |
| 13.25 | 0.9301 | 0.8269 | 0.6426 | 0.5025 | 0.2853 | 0.231  | 0.4784 | 0.4328 | 0.2253 | 0.2193 | 0.2143 |
| 13.5  | 0.9508 | 0.849  | 0.6665 | 0.5234 | 0.2879 | 0.2315 | 0.4921 | 0.4406 | 0.2282 | 0.2199 | 0.2158 |
| 13.75 | 0.9679 | 0.8707 | 0.6913 | 0.5441 | 0.2933 | 0.2333 | 0.5061 | 0.4496 | 0.2319 | 0.2204 | 0.2168 |
| 14    | 0.986  | 0.8918 | 0.7152 | 0.5652 | 0.298  | 0.236  | 0.5226 | 0.4575 | 0.2343 | 0.2243 | 0.2184 |
| 14.25 | 1.0047 | 0.9106 | 0.7372 | 0.5846 | 0.3035 | 0.2374 | 0.5357 | 0.461  | 0.2344 | 0.2271 | 0.2191 |
| 14.5  | 1.0233 | 0.9308 | 0.7608 | 0.6069 | 0.3071 | 0.2383 | 0.5517 | 0.468  | 0.2356 | 0.2315 | 0.2214 |
| 14.75 | 1.0397 | 0.9491 | 0.7825 | 0.6284 | 0.3123 | 0.2414 | 0.5636 | 0.478  | 0.2392 | 0.2337 | 0.2221 |
| 15    | 1.0577 | 0.966  | 0.8057 | 0.6488 | 0.3175 | 0.2391 | 0.5791 | 0.4837 | 0.2416 | 0.2353 | 0.2243 |
| 15.25 | 1.0753 | 0.9853 | 0.8251 | 0.6673 | 0.3222 | 0.2378 | 0.5943 | 0.4932 | 0.2422 | 0.2361 | 0.2237 |
| 15.5  | 1.0897 | 1.0015 | 0.8439 | 0.6864 | 0.3271 | 0.2365 | 0.6081 | 0.5006 | 0.2441 | 0.2346 | 0.2188 |
| 15.75 | 1.1049 | 1.0198 | 0.8628 | 0.7032 | 0.3335 | 0.2382 | 0.626  | 0.5109 | 0.2464 | 0.2338 | 0.2183 |
| 16    | 1.1171 | 1.031  | 0.8817 | 0.7223 | 0.3393 | 0.2395 | 0.6375 | 0.5179 | 0.2481 | 0.235  | 0.219  |
| 16.25 | 1.1316 | 1.0487 | 0.8996 | 0.7395 | 0.3471 | 0.2421 | 0.6553 | 0.5272 | 0.2517 | 0.2362 | 0.2192 |
| 16.5  | 1.1443 | 1.0637 | 0.9165 | 0.7561 | 0.3541 | 0.2437 | 0.6683 | 0.5369 | 0.2551 | 0.2377 | 0.2206 |
| 16.75 | 1.1579 | 1.0806 | 0.9342 | 0.7747 | 0.3584 | 0.2431 | 0.6831 | 0.5453 | 0.2585 | 0.2387 | 0.2212 |
| 17    | 1.1715 | 1.0952 | 0.9517 | 0.7911 | 0.3651 | 0.2446 | 0.6983 | 0.5557 | 0.2615 | 0.2404 | 0.2224 |
| 17.25 | 1.1858 | 1.1114 | 0.9682 | 0.8056 | 0.3714 | 0.2458 | 0.715  | 0.5658 | 0.2634 | 0.2412 | 0.2242 |
| 17.5  | 1.2004 | 1.1256 | 0.9855 | 0.8243 | 0.3781 | 0.2469 | 0.7274 | 0.5747 | 0.2671 | 0.2424 | 0.2251 |
| 17.75 | 1.2123 | 1.1388 | 1.0016 | 0.8404 | 0.3849 | 0.2495 | 0.7445 | 0.5855 | 0.269  | 0.2418 | 0.2242 |
| 18    | 1.2261 | 1.1522 | 1.015  | 0.8583 | 0.391  | 0.2505 | 0.7589 | 0.5959 | 0.2718 | 0.2442 | 0.2252 |

|       |        |        |        |        |        |        |        |        |        |        |        |
|-------|--------|--------|--------|--------|--------|--------|--------|--------|--------|--------|--------|
| 18.25 | 1.239  | 1.1664 | 1.0307 | 0.8744 | 0.3994 | 0.2535 | 0.7759 | 0.6051 | 0.2753 | 0.246  | 0.2265 |
| 18.5  | 1.251  | 1.1779 | 1.0478 | 0.8915 | 0.4074 | 0.2544 | 0.7905 | 0.6146 | 0.2783 | 0.2469 | 0.2268 |
| 18.75 | 1.2641 | 1.1907 | 1.0607 | 0.9093 | 0.4142 | 0.2554 | 0.8083 | 0.6258 | 0.2821 | 0.2484 | 0.2262 |
| 19    | 1.2773 | 1.2018 | 1.0765 | 0.925  | 0.4218 | 0.2591 | 0.8225 | 0.6357 | 0.2836 | 0.2497 | 0.2278 |
| 19.25 | 1.2907 | 1.2145 | 1.0891 | 0.9403 | 0.4298 | 0.2619 | 0.841  | 0.6469 | 0.2878 | 0.2509 | 0.2284 |
| 19.5  | 1.3032 | 1.2259 | 1.1041 | 0.9529 | 0.4363 | 0.2631 | 0.8554 | 0.6573 | 0.2913 | 0.2515 | 0.229  |
| 19.75 | 1.3141 | 1.239  | 1.1166 | 0.9686 | 0.4445 | 0.263  | 0.8718 | 0.6673 | 0.2938 | 0.2529 | 0.2301 |
| 20    | 1.3251 | 1.2497 | 1.1283 | 0.9805 | 0.4517 | 0.2641 | 0.8862 | 0.677  | 0.2962 | 0.254  | 0.2303 |
| 20.25 | 1.3374 | 1.2637 | 1.1419 | 0.9937 | 0.4584 | 0.2673 | 0.9043 | 0.6884 | 0.3001 | 0.2554 | 0.2321 |
| 20.5  | 1.3474 | 1.2743 | 1.1521 | 1.0057 | 0.4671 | 0.2685 | 0.918  | 0.701  | 0.3041 | 0.257  | 0.2334 |
| 20.75 | 1.3589 | 1.2848 | 1.1637 | 1.0177 | 0.4753 | 0.2689 | 0.9335 | 0.7108 | 0.3069 | 0.2575 | 0.2337 |
| 21    | 1.3704 | 1.2956 | 1.1744 | 1.0274 | 0.4821 | 0.2704 | 0.9478 | 0.7199 | 0.31   | 0.2588 | 0.2341 |
| 21.25 | 1.3806 | 1.3083 | 1.1829 | 1.037  | 0.4897 | 0.2718 | 0.9654 | 0.7299 | 0.3118 | 0.2595 | 0.234  |
| 21.5  | 1.39   | 1.3184 | 1.1906 | 1.0464 | 0.4957 | 0.2733 | 0.9774 | 0.7405 | 0.3147 | 0.26   | 0.2343 |
| 21.75 | 1.3999 | 1.3289 | 1.2037 | 1.0582 | 0.5033 | 0.2735 | 0.9885 | 0.7496 | 0.3168 | 0.2609 | 0.235  |
| 22    | 1.4093 | 1.3395 | 1.2116 | 1.0664 | 0.5118 | 0.276  | 1.004  | 0.7602 | 0.3191 | 0.261  | 0.2353 |
| 22.25 | 1.4189 | 1.3493 | 1.2223 | 1.0772 | 0.5183 | 0.2767 | 1.0167 | 0.7694 | 0.3213 | 0.2624 | 0.2368 |
| 22.5  | 1.4278 | 1.3589 | 1.2316 | 1.0855 | 0.525  | 0.2782 | 1.0304 | 0.7797 | 0.3235 | 0.2626 | 0.237  |
| 22.75 | 1.4356 | 1.369  | 1.2391 | 1.0948 | 0.5318 | 0.2792 | 1.0416 | 0.7897 | 0.3268 | 0.2634 | 0.2371 |
| 23    | 1.4425 | 1.3781 | 1.2485 | 1.1049 | 0.5373 | 0.2803 | 1.056  | 0.7987 | 0.3285 | 0.2651 | 0.2378 |
| 23.25 | 1.4488 | 1.3861 | 1.257  | 1.1139 | 0.546  | 0.2789 | 1.0651 | 0.8084 | 0.3327 | 0.2665 | 0.238  |
| 23.5  | 1.4527 | 1.3947 | 1.2667 | 1.1236 | 0.5524 | 0.2808 | 1.0801 | 0.8192 | 0.3348 | 0.2663 | 0.2378 |
| 23.75 | 1.4559 | 1.4037 | 1.2752 | 1.132  | 0.5582 | 0.2817 | 1.0916 | 0.8286 | 0.338  | 0.2669 | 0.2393 |
| 24    | 1.4583 | 1.4119 | 1.2845 | 1.1396 | 0.5653 | 0.2831 | 1.1047 | 0.8388 | 0.3407 | 0.2659 | 0.2384 |
| 24.25 | 1.4609 | 1.4188 | 1.2937 | 1.1488 | 0.5708 | 0.2856 | 1.1174 | 0.8485 | 0.3424 | 0.268  | 0.2403 |
| 24.5  | 1.4615 | 1.4276 | 1.3014 | 1.1553 | 0.576  | 0.2874 | 1.1284 | 0.8584 | 0.3455 | 0.2682 | 0.239  |
| 24.75 | 1.4635 | 1.4341 | 1.3101 | 1.1629 | 0.5822 | 0.288  | 1.1386 | 0.8672 | 0.3476 | 0.2701 | 0.2409 |
| 25    | 1.466  | 1.4379 | 1.3177 | 1.1723 | 0.5865 | 0.289  | 1.1499 | 0.8772 | 0.3495 | 0.2702 | 0.2402 |
| 25.25 | 1.4669 | 1.4431 | 1.3269 | 1.179  | 0.5929 | 0.2898 | 1.1596 | 0.8852 | 0.3507 | 0.2713 | 0.2413 |
| 25.5  | 1.4687 | 1.4476 | 1.3358 | 1.1886 | 0.5982 | 0.2914 | 1.171  | 0.8961 | 0.3539 | 0.2721 | 0.2407 |
| 25.75 | 1.4687 | 1.4518 | 1.345  | 1.1955 | 0.6025 | 0.2914 | 1.1798 | 0.9043 | 0.3551 | 0.2716 | 0.2419 |
| 26    | 1.4682 | 1.453  | 1.3526 | 1.2012 | 0.6069 | 0.289  | 1.1906 | 0.9117 | 0.3552 | 0.2706 | 0.2414 |
| 26.25 | 1.4704 | 1.4557 | 1.3577 | 1.2092 | 0.6126 | 0.2898 | 1.1997 | 0.9217 | 0.3581 | 0.272  | 0.2428 |
| 26.5  | 1.4702 | 1.4595 | 1.368  | 1.2151 | 0.6176 | 0.2906 | 1.2106 | 0.9317 | 0.3596 | 0.2731 | 0.2439 |
| 26.75 | 1.4706 | 1.4619 | 1.3756 | 1.2224 | 0.622  | 0.2906 | 1.22   | 0.9404 | 0.363  | 0.2736 | 0.2431 |
| 27    | 1.4716 | 1.4639 | 1.3808 | 1.2273 | 0.6282 | 0.2926 | 1.2301 | 0.9485 | 0.3644 | 0.2734 | 0.2431 |
| 27.25 | 1.4725 | 1.4677 | 1.3894 | 1.2353 | 0.6343 | 0.294  | 1.2397 | 0.9596 | 0.366  | 0.2728 | 0.2438 |
| 27.5  | 1.473  | 1.4709 | 1.396  | 1.2415 | 0.6405 | 0.2943 | 1.2473 | 0.9676 | 0.3682 | 0.2747 | 0.2453 |
| 27.75 | 1.4747 | 1.4735 | 1.4025 | 1.2482 | 0.6457 | 0.2957 | 1.2575 | 0.9775 | 0.3692 | 0.2751 | 0.2447 |
| 28    | 1.4747 | 1.4758 | 1.4095 | 1.2543 | 0.6529 | 0.2955 | 1.2657 | 0.9866 | 0.3726 | 0.2751 | 0.2448 |
| 28.25 | 1.4772 | 1.4784 | 1.4156 | 1.2602 | 0.6601 | 0.2976 | 1.2771 | 0.9957 | 0.3733 | 0.2761 | 0.2435 |
| 28.5  | 1.4758 | 1.4806 | 1.4201 | 1.2666 | 0.6659 | 0.2984 | 1.2853 | 1.0036 | 0.376  | 0.2765 | 0.2454 |

|       |        |        |        |        |        |        |        |        |        |        |        |
|-------|--------|--------|--------|--------|--------|--------|--------|--------|--------|--------|--------|
| 28.75 | 1.4763 | 1.4813 | 1.4239 | 1.2723 | 0.6729 | 0.2994 | 1.2938 | 1.013  | 0.3787 | 0.2769 | 0.2448 |
| 29    | 1.4771 | 1.4829 | 1.4289 | 1.2795 | 0.6804 | 0.3008 | 1.3031 | 1.0212 | 0.3807 | 0.2783 | 0.2453 |
| 29.25 | 1.4786 | 1.485  | 1.4341 | 1.2841 | 0.6876 | 0.3024 | 1.3108 | 1.0306 | 0.3841 | 0.2781 | 0.2451 |
| 29.5  | 1.4803 | 1.4861 | 1.4367 | 1.2884 | 0.6949 | 0.304  | 1.3184 | 1.0398 | 0.3854 | 0.2802 | 0.2459 |
| 29.75 | 1.4807 | 1.4866 | 1.4387 | 1.2932 | 0.7016 | 0.3049 | 1.3259 | 1.0492 | 0.3878 | 0.2799 | 0.2461 |
| 30    | 1.4823 | 1.4892 | 1.4412 | 1.2981 | 0.7101 | 0.3059 | 1.3335 | 1.0586 | 0.3896 | 0.2806 | 0.2453 |
| 30.25 | 1.4831 | 1.49   | 1.4444 | 1.3014 | 0.7149 | 0.3032 | 1.3405 | 1.0663 | 0.3885 | 0.2791 | 0.2477 |
| 30.5  | 1.4829 | 1.4913 | 1.4444 | 1.3039 | 0.721  | 0.3038 | 1.3471 | 1.0753 | 0.39   | 0.2793 | 0.2463 |
| 30.75 | 1.4823 | 1.4923 | 1.4446 | 1.3087 | 0.7297 | 0.3042 | 1.3536 | 1.0836 | 0.3915 | 0.2796 | 0.2474 |
| 31    | 1.4825 | 1.4929 | 1.4466 | 1.3137 | 0.7368 | 0.305  | 1.3606 | 1.0928 | 0.3933 | 0.2793 | 0.2472 |
| 31.25 | 1.4843 | 1.4939 | 1.448  | 1.316  | 0.7447 | 0.3057 | 1.3667 | 1.1023 | 0.3942 | 0.2793 | 0.2467 |
| 31.5  | 1.4842 | 1.496  | 1.4475 | 1.3186 | 0.7526 | 0.3063 | 1.3726 | 1.1101 | 0.3961 | 0.2818 | 0.2484 |
| 31.75 | 1.4837 | 1.4956 | 1.4475 | 1.32   | 0.7618 | 0.3087 | 1.38   | 1.1209 | 0.3995 | 0.2809 | 0.2479 |
| 32    | 1.4837 | 1.4964 | 1.4488 | 1.324  | 0.7687 | 0.3085 | 1.3861 | 1.1302 | 0.4018 | 0.2828 | 0.2493 |
| 32.25 | 1.4847 | 1.4969 | 1.4483 | 1.3251 | 0.7786 | 0.3096 | 1.3899 | 1.1385 | 0.4028 | 0.2811 | 0.247  |
| 32.5  | 1.4848 | 1.4964 | 1.448  | 1.3268 | 0.788  | 0.3105 | 1.3942 | 1.1441 | 0.4056 | 0.2825 | 0.2482 |
| 32.75 | 1.4858 | 1.4974 | 1.448  | 1.3285 | 0.795  | 0.3121 | 1.3995 | 1.1527 | 0.4064 | 0.2826 | 0.2496 |
| 33    | 1.4867 | 1.4992 | 1.4467 | 1.3281 | 0.8031 | 0.3121 | 1.4033 | 1.1599 | 0.4076 | 0.2832 | 0.2478 |
| 33.25 | 1.4876 | 1.498  | 1.4476 | 1.3296 | 0.8101 | 0.3135 | 1.4069 | 1.1667 | 0.4102 | 0.2825 | 0.2486 |
| 33.5  | 1.4885 | 1.4993 | 1.4481 | 1.329  | 0.8198 | 0.315  | 1.4105 | 1.1753 | 0.4112 | 0.2841 | 0.2481 |
| 33.75 | 1.4883 | 1.4994 | 1.4469 | 1.33   | 0.8258 | 0.3144 | 1.4124 | 1.1838 | 0.4144 | 0.2834 | 0.249  |
| 34    | 1.4888 | 1.4988 | 1.4474 | 1.3298 | 0.8344 | 0.3154 | 1.4158 | 1.1917 | 0.4155 | 0.2846 | 0.2483 |
| 34.25 | 1.4892 | 1.4995 | 1.4471 | 1.3297 | 0.8415 | 0.3156 | 1.4184 | 1.1997 | 0.4178 | 0.2845 | 0.2479 |
| 34.5  | 1.4899 | 1.4996 | 1.4474 | 1.3316 | 0.8523 | 0.3164 | 1.4198 | 1.2062 | 0.4193 | 0.285  | 0.2482 |
| 34.75 | 1.4919 | 1.5003 | 1.4472 | 1.3302 | 0.859  | 0.3175 | 1.4217 | 1.2151 | 0.4207 | 0.2845 | 0.248  |
| 35    | 1.492  | 1.5014 | 1.4486 | 1.3307 | 0.8677 | 0.3164 | 1.4223 | 1.2229 | 0.4224 | 0.2854 | 0.2496 |
| 35.25 | 1.4922 | 1.502  | 1.4486 | 1.3297 | 0.8753 | 0.3176 | 1.4234 | 1.2309 | 0.4242 | 0.2859 | 0.2489 |
| 35.5  | 1.4933 | 1.5004 | 1.4477 | 1.3296 | 0.8857 | 0.3197 | 1.4248 | 1.2374 | 0.4251 | 0.2864 | 0.2494 |
| 35.75 | 1.4939 | 1.5019 | 1.4479 | 1.3307 | 0.892  | 0.3186 | 1.4257 | 1.2448 | 0.427  | 0.2862 | 0.2493 |
| 36    | 1.4951 | 1.5018 | 1.4476 | 1.3311 | 0.9008 | 0.3202 | 1.4247 | 1.2518 | 0.4282 | 0.2846 | 0.2476 |
| 36.25 | 1.4965 | 1.5015 | 1.4469 | 1.3314 | 0.9098 | 0.3196 | 1.4236 | 1.26   | 0.4306 | 0.2861 | 0.2496 |
| 36.5  | 1.4976 | 1.5021 | 1.4473 | 1.3317 | 0.9182 | 0.3204 | 1.4231 | 1.2669 | 0.4323 | 0.2865 | 0.2481 |
| 36.75 | 1.4983 | 1.5037 | 1.4481 | 1.3309 | 0.9262 | 0.3185 | 1.4226 | 1.2704 | 0.4329 | 0.2853 | 0.2499 |
| 37    | 1.4992 | 1.5034 | 1.4477 | 1.33   | 0.9339 | 0.3173 | 1.4215 | 1.2758 | 0.4345 | 0.2843 | 0.2488 |
| 37.25 | 1.4997 | 1.504  | 1.449  | 1.3304 | 0.9431 | 0.3177 | 1.4196 | 1.2818 | 0.4346 | 0.283  | 0.2486 |
| 37.5  | 1.5011 | 1.5037 | 1.4489 | 1.3308 | 0.9481 | 0.3188 | 1.4203 | 1.2884 | 0.4388 | 0.2848 | 0.2492 |
| 37.75 | 1.502  | 1.505  | 1.4486 | 1.3311 | 0.9582 | 0.3192 | 1.42   | 1.2948 | 0.441  | 0.2847 | 0.2488 |
| 38    | 1.5029 | 1.5047 | 1.4475 | 1.3306 | 0.9674 | 0.3203 | 1.4188 | 1.2994 | 0.4404 | 0.2852 | 0.2491 |
| 38.25 | 1.5029 | 1.5046 | 1.449  | 1.3316 | 0.9749 | 0.3203 | 1.4205 | 1.306  | 0.4443 | 0.2861 | 0.2488 |
| 38.5  | 1.504  | 1.505  | 1.4481 | 1.3314 | 0.9851 | 0.3215 | 1.4188 | 1.3122 | 0.4463 | 0.285  | 0.249  |
| 38.75 | 1.5035 | 1.5042 | 1.448  | 1.3307 | 0.9925 | 0.3223 | 1.4195 | 1.319  | 0.4487 | 0.285  | 0.2482 |
| 39    | 1.5042 | 1.505  | 1.4488 | 1.3318 | 1.0013 | 0.3222 | 1.4191 | 1.3241 | 0.4511 | 0.286  | 0.25   |

|       |        |        |        |        |        |        |        |        |        |        |        |
|-------|--------|--------|--------|--------|--------|--------|--------|--------|--------|--------|--------|
| 39.25 | 1.5058 | 1.5049 | 1.4482 | 1.3308 | 1.0098 | 0.3233 | 1.4195 | 1.3278 | 0.4528 | 0.2857 | 0.2498 |
| 39.5  | 1.507  | 1.5052 | 1.4485 | 1.3321 | 1.0192 | 0.3242 | 1.4176 | 1.3335 | 0.4555 | 0.2857 | 0.25   |
| 39.75 | 1.5073 | 1.506  | 1.4484 | 1.3313 | 1.0268 | 0.3255 | 1.4185 | 1.3394 | 0.4596 | 0.2857 | 0.249  |
| 40    | 1.5077 | 1.5062 | 1.4489 | 1.3317 | 1.0352 | 0.3256 | 1.4179 | 1.3443 | 0.463  | 0.2864 | 0.2492 |
| 40.25 | 1.5093 | 1.5063 | 1.4496 | 1.3325 | 1.0431 | 0.327  | 1.4186 | 1.3485 | 0.4652 | 0.2863 | 0.249  |
| 40.5  | 1.5096 | 1.506  | 1.4489 | 1.3297 | 1.0511 | 0.3271 | 1.4179 | 1.3541 | 0.4675 | 0.2863 | 0.2501 |
| 40.75 | 1.5108 | 1.5059 | 1.4494 | 1.3304 | 1.0601 | 0.3287 | 1.4186 | 1.3576 | 0.4705 | 0.2853 | 0.249  |
| 41    | 1.5129 | 1.5053 | 1.4485 | 1.3297 | 1.0684 | 0.3279 | 1.4174 | 1.3639 | 0.474  | 0.2866 | 0.2503 |
| 41.25 | 1.5127 | 1.5048 | 1.4491 | 1.3294 | 1.079  | 0.3303 | 1.417  | 1.3678 | 0.4764 | 0.2861 | 0.2491 |
| 41.5  | 1.513  | 1.5052 | 1.4495 | 1.3298 | 1.0861 | 0.3302 | 1.4172 | 1.3729 | 0.4807 | 0.2867 | 0.2491 |
| 41.75 | 1.513  | 1.5045 | 1.4496 | 1.3298 | 1.0944 | 0.3315 | 1.4166 | 1.3758 | 0.4816 | 0.2864 | 0.2492 |
| 42    | 1.5143 | 1.506  | 1.4492 | 1.3306 | 1.1008 | 0.3329 | 1.4164 | 1.3792 | 0.4847 | 0.2865 | 0.2497 |
| 42.25 | 1.5164 | 1.506  | 1.4512 | 1.3299 | 1.1101 | 0.3334 | 1.4175 | 1.3825 | 0.4873 | 0.2861 | 0.2479 |
| 42.5  | 1.5166 | 1.5062 | 1.4516 | 1.3311 | 1.1196 | 0.3342 | 1.4155 | 1.3852 | 0.4911 | 0.2864 | 0.2488 |
| 42.75 | 1.518  | 1.506  | 1.4518 | 1.3305 | 1.1253 | 0.3347 | 1.4154 | 1.3893 | 0.494  | 0.2871 | 0.2495 |
| 43    | 1.5154 | 1.5053 | 1.4522 | 1.3306 | 1.135  | 0.3366 | 1.4162 | 1.3926 | 0.4979 | 0.2878 | 0.249  |
| 43.25 | 1.5129 | 1.5059 | 1.4522 | 1.3303 | 1.1416 | 0.3372 | 1.4142 | 1.394  | 0.4999 | 0.2871 | 0.2501 |
| 43.5  | 1.5111 | 1.5064 | 1.4527 | 1.329  | 1.1484 | 0.3388 | 1.415  | 1.3959 | 0.502  | 0.287  | 0.2488 |
| 43.75 | 1.5114 | 1.5084 | 1.453  | 1.33   | 1.1579 | 0.3397 | 1.4141 | 1.3979 | 0.5054 | 0.2872 | 0.2492 |
| 44    | 1.5125 | 1.5078 | 1.4529 | 1.3302 | 1.1665 | 0.3416 | 1.4149 | 1.4015 | 0.51   | 0.2884 | 0.2498 |
| 44.25 | 1.5102 | 1.5073 | 1.4529 | 1.331  | 1.1739 | 0.3427 | 1.4133 | 1.4019 | 0.5134 | 0.2889 | 0.2502 |
| 44.5  | 1.5105 | 1.5065 | 1.4523 | 1.3301 | 1.1787 | 0.3449 | 1.4144 | 1.403  | 0.5172 | 0.2893 | 0.2508 |
| 44.75 | 1.5104 | 1.5065 | 1.454  | 1.3321 | 1.1859 | 0.346  | 1.4137 | 1.4039 | 0.5202 | 0.29   | 0.2505 |
| 45    | 1.5092 | 1.5064 | 1.4543 | 1.3308 | 1.1907 | 0.3467 | 1.4129 | 1.4048 | 0.5238 | 0.2895 | 0.2498 |
| 45.25 | 1.5105 | 1.5057 | 1.4541 | 1.331  | 1.1967 | 0.3478 | 1.4119 | 1.4044 | 0.5254 | 0.2883 | 0.2488 |
| 45.5  | 1.5103 | 1.5065 | 1.4557 | 1.3299 | 1.1994 | 0.349  | 1.4131 | 1.4064 | 0.5286 | 0.2895 | 0.2496 |
| 45.75 | 1.51   | 1.5067 | 1.4559 | 1.3302 | 1.206  | 0.3511 | 1.4123 | 1.405  | 0.5314 | 0.2887 | 0.2494 |
| 46    | 1.5108 | 1.5061 | 1.4561 | 1.3301 | 1.2114 | 0.3522 | 1.4106 | 1.4049 | 0.5344 | 0.2891 | 0.2502 |
| 46.25 | 1.5109 | 1.5064 | 1.456  | 1.3307 | 1.2137 | 0.3518 | 1.4124 | 1.4042 | 0.5377 | 0.2898 | 0.25   |
| 46.5  | 1.511  | 1.5069 | 1.4571 | 1.3315 | 1.2171 | 0.3551 | 1.4127 | 1.4042 | 0.5404 | 0.2891 | 0.2487 |
| 46.75 | 1.511  | 1.5052 | 1.4577 | 1.3302 | 1.2193 | 0.3556 | 1.4119 | 1.4038 | 0.5437 | 0.2894 | 0.2482 |
| 47    | 1.5111 | 1.5059 | 1.4574 | 1.331  | 1.2228 | 0.3577 | 1.4106 | 1.4034 | 0.5474 | 0.2891 | 0.25   |
| 47.25 | 1.5102 | 1.5042 | 1.4571 | 1.332  | 1.2247 | 0.3604 | 1.412  | 1.4023 | 0.5504 | 0.289  | 0.2501 |
| 47.5  | 1.5112 | 1.5044 | 1.4583 | 1.3298 | 1.2263 | 0.3609 | 1.4102 | 1.4016 | 0.5539 | 0.2896 | 0.2494 |
| 47.75 | 1.5109 | 1.5036 | 1.4575 | 1.3301 | 1.2268 | 0.3627 | 1.4104 | 1.4009 | 0.556  | 0.2896 | 0.2493 |
| 48    | 1.511  | 1.5046 | 1.4582 | 1.3302 | 1.2295 | 0.3643 | 1.4106 | 1.4011 | 0.5594 | 0.2893 | 0.2499 |
| 48.25 | 1.511  | 1.5042 | 1.4587 | 1.3299 | 1.2308 | 0.367  | 1.4094 | 1.4001 | 0.5624 | 0.2906 | 0.2496 |
| 48.5  | 1.5111 | 1.504  | 1.4592 | 1.329  | 1.2302 | 0.3682 | 1.4104 | 1.401  | 0.5655 | 0.2891 | 0.2489 |
| 48.75 | 1.5107 | 1.5019 | 1.4578 | 1.3298 | 1.2333 | 0.3688 | 1.4099 | 1.3996 | 0.5672 | 0.2903 | 0.2488 |
| 49    | 1.5112 | 1.5026 | 1.4586 | 1.329  | 1.2345 | 0.3711 | 1.4106 | 1.4    | 0.5716 | 0.2895 | 0.2491 |
| 49.25 | 1.5109 | 1.5034 | 1.4604 | 1.3302 | 1.2349 | 0.3737 | 1.4093 | 1.399  | 0.5743 | 0.2887 | 0.2482 |
| 49.5  | 1.5094 | 1.504  | 1.4603 | 1.3292 | 1.2362 | 0.3747 | 1.4097 | 1.3987 | 0.577  | 0.2895 | 0.2481 |

49.75 1.5105 1.5038 1.4602 1.3299 1.2376 0.3772 1.4096 1.3987 0.5818 0.2898 0.2481

- ◆ WT
- WT(GA 3)
- ▲ WT(RAD 3)
- × NO DRUG
- ✱ GA 3uM
- GA 7uM
- + NOVO 100
- NOVO 250
- RAD 3
- RAD 10



◆ RAD 10

■ RAD 30

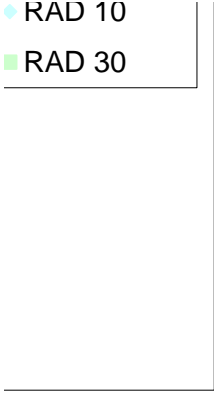

|             | <b>O17</b>     | <b>O18</b>    | <b>O19</b>    | <b>O20</b>      | <b>O21</b>      | <b>O22</b>   | <b>O23</b>    | <b>O24</b>    |
|-------------|----------------|---------------|---------------|-----------------|-----------------|--------------|---------------|---------------|
| <b>TIME</b> | <b>NO DRUG</b> | <b>GA 3uM</b> | <b>GA 7uM</b> | <b>NOVO 100</b> | <b>NOVO 250</b> | <b>RAD 3</b> | <b>RAD 10</b> | <b>RAD 30</b> |
| 0           | 0.1894         | 0.2051        | 0.2016        | 0.292           | 0.3629          | 0.1892       | 0.2           | 0.2119        |
| 0.25        | 0.1844         | 0.1929        | 0.1866        | 0.2877          | 0.3516          | 0.1812       | 0.1911        | 0.2004        |
| 0.5         | 0.1833         | 0.1912        | 0.1818        | 0.2886          | 0.3406          | 0.1787       | 0.1878        | 0.2           |
| 0.75        | 0.1838         | 0.189         | 0.183         | 0.2827          | 0.3318          | 0.1758       | 0.1882        | 0.1987        |
| 1           | 0.1843         | 0.1877        | 0.1816        | 0.2802          | 0.3279          | 0.1818       | 0.1888        | 0.199         |
| 1.25        | 0.1867         | 0.1862        | 0.1816        | 0.2785          | 0.3199          | 0.1836       | 0.1891        | 0.199         |
| 1.5         | 0.188          | 0.186         | 0.1818        | 0.2786          | 0.3144          | 0.1823       | 0.1888        | 0.1979        |

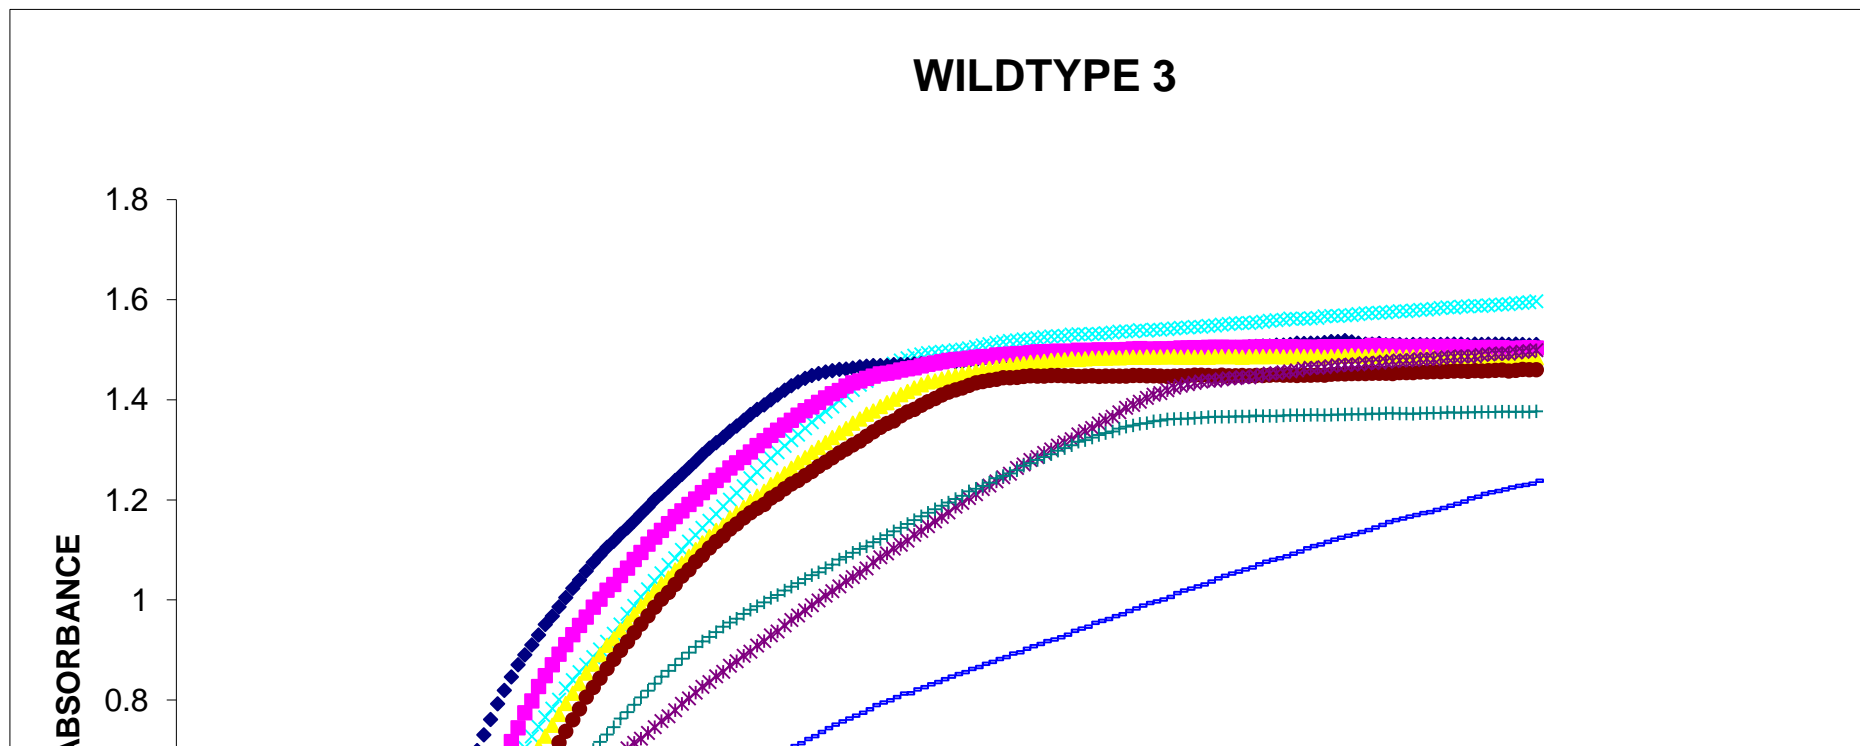

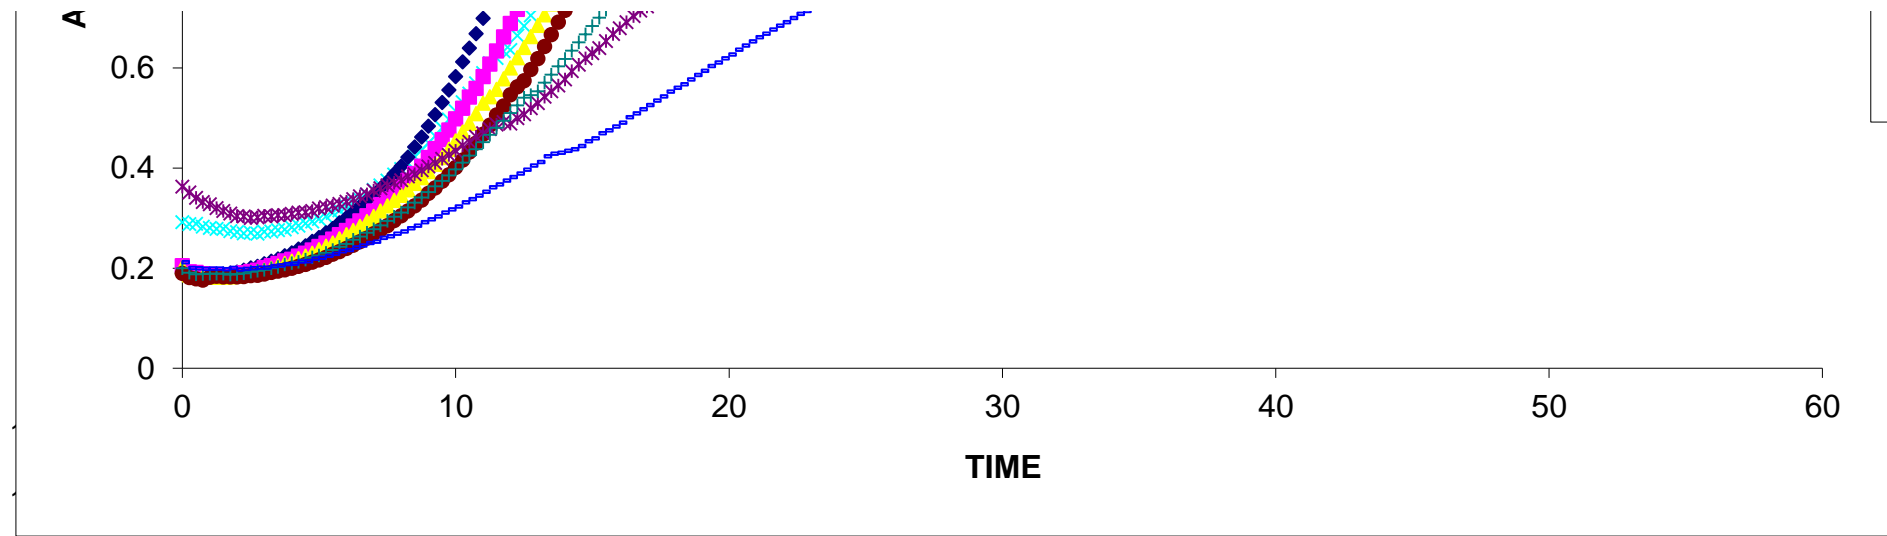

|       |        |        |        |        |        |        |        |        |
|-------|--------|--------|--------|--------|--------|--------|--------|--------|
| 11.25 | 0.7307 | 0.6075 | 0.5428 | 0.6095 | 0.4778 | 0.4857 | 0.4663 | 0.3618 |
| 11.5  | 0.7614 | 0.6339 | 0.5569 | 0.6199 | 0.4871 | 0.5059 | 0.4805 | 0.3671 |
| 11.75 | 0.7927 | 0.6618 | 0.5783 | 0.6335 | 0.4921 | 0.5242 | 0.4946 | 0.3747 |
| 12    | 0.8194 | 0.6889 | 0.6003 | 0.6361 | 0.489  | 0.5464 | 0.5098 | 0.3819 |
| 12.25 | 0.8459 | 0.7168 | 0.6205 | 0.6649 | 0.4995 | 0.5622 | 0.5251 | 0.3893 |
| 12.5  | 0.8706 | 0.7448 | 0.641  | 0.684  | 0.5072 | 0.5743 | 0.5407 | 0.3966 |
| 12.75 | 0.8904 | 0.7744 | 0.6628 | 0.7052 | 0.5192 | 0.5968 | 0.546  | 0.4048 |
| 13    | 0.9099 | 0.7982 | 0.685  | 0.727  | 0.5297 | 0.6186 | 0.5531 | 0.4123 |
| 13.25 | 0.9301 | 0.8269 | 0.7062 | 0.7465 | 0.5422 | 0.6426 | 0.5705 | 0.4233 |
| 13.5  | 0.9508 | 0.849  | 0.7282 | 0.7659 | 0.5534 | 0.6665 | 0.5868 | 0.4289 |
| 13.75 | 0.9679 | 0.8707 | 0.7496 | 0.7829 | 0.565  | 0.6913 | 0.6033 | 0.4304 |
| 14    | 0.986  | 0.8918 | 0.7715 | 0.8006 | 0.5767 | 0.7152 | 0.6179 | 0.4342 |
| 14.25 | 1.0047 | 0.9106 | 0.7929 | 0.8232 | 0.5934 | 0.7372 | 0.6344 | 0.4376 |
| 14.5  | 1.0233 | 0.9308 | 0.8133 | 0.84   | 0.6065 | 0.7608 | 0.6512 | 0.4439 |
| 14.75 | 1.0397 | 0.9491 | 0.8328 | 0.8555 | 0.6193 | 0.7825 | 0.6674 | 0.4533 |
| 15    | 1.0577 | 0.966  | 0.8542 | 0.8708 | 0.6294 | 0.8057 | 0.6836 | 0.4596 |
| 15.25 | 1.0753 | 0.9853 | 0.8716 | 0.8856 | 0.6395 | 0.8251 | 0.7002 | 0.4694 |
| 15.5  | 1.0897 | 1.0015 | 0.8903 | 0.9009 | 0.6538 | 0.8439 | 0.7167 | 0.4755 |
| 15.75 | 1.1049 | 1.0198 | 0.9095 | 0.9165 | 0.6676 | 0.8628 | 0.7309 | 0.4831 |
| 16    | 1.1171 | 1.031  | 0.9226 | 0.9324 | 0.6793 | 0.8817 | 0.7461 | 0.4906 |
| 16.25 | 1.1316 | 1.0487 | 0.9396 | 0.9512 | 0.6913 | 0.8996 | 0.7633 | 0.5013 |
| 16.5  | 1.1443 | 1.0637 | 0.954  | 0.9719 | 0.7035 | 0.9165 | 0.7759 | 0.509  |
| 16.75 | 1.1579 | 1.0806 | 0.9711 | 0.9883 | 0.7146 | 0.9342 | 0.7906 | 0.5174 |
| 17    | 1.1715 | 1.0952 | 0.9876 | 1.0063 | 0.7231 | 0.9517 | 0.8051 | 0.5257 |
| 17.25 | 1.1858 | 1.1114 | 1.002  | 1.0213 | 0.7345 | 0.9682 | 0.8187 | 0.5348 |
| 17.5  | 1.2004 | 1.1256 | 1.0181 | 1.0378 | 0.7461 | 0.9855 | 0.8326 | 0.5434 |

|       |        |        |        |        |        |        |        |        |
|-------|--------|--------|--------|--------|--------|--------|--------|--------|
| 17.75 | 1.2123 | 1.1388 | 1.0321 | 1.0536 | 0.7577 | 1.0016 | 0.8467 | 0.5526 |
| 18    | 1.2261 | 1.1522 | 1.044  | 1.0703 | 0.7673 | 1.015  | 0.8586 | 0.5606 |
| 18.25 | 1.239  | 1.1664 | 1.0597 | 1.0834 | 0.78   | 1.0307 | 0.8699 | 0.5672 |
| 18.5  | 1.251  | 1.1779 | 1.0729 | 1.1002 | 0.7922 | 1.0478 | 0.8829 | 0.5767 |
| 18.75 | 1.2641 | 1.1907 | 1.0875 | 1.1168 | 0.8032 | 1.0607 | 0.8951 | 0.586  |
| 19    | 1.2773 | 1.2018 | 1.1005 | 1.1296 | 0.8147 | 1.0765 | 0.9066 | 0.594  |
| 19.25 | 1.2907 | 1.2145 | 1.1144 | 1.1445 | 0.8261 | 1.0891 | 0.917  | 0.604  |
| 19.5  | 1.3032 | 1.2259 | 1.1267 | 1.1582 | 0.836  | 1.1041 | 0.9262 | 0.6112 |
| 19.75 | 1.3141 | 1.239  | 1.1388 | 1.1718 | 0.8473 | 1.1166 | 0.9356 | 0.6194 |
| 20    | 1.3251 | 1.2497 | 1.1491 | 1.1873 | 0.8564 | 1.1283 | 0.9464 | 0.6266 |
| 20.25 | 1.3374 | 1.2637 | 1.1637 | 1.2007 | 0.8684 | 1.1419 | 0.9546 | 0.6364 |
| 20.5  | 1.3474 | 1.2743 | 1.1738 | 1.214  | 0.8776 | 1.1521 | 0.9626 | 0.6445 |
| 20.75 | 1.3589 | 1.2848 | 1.1849 | 1.2272 | 0.8883 | 1.1637 | 0.9724 | 0.6531 |
| 21    | 1.3704 | 1.2956 | 1.1965 | 1.2431 | 0.8967 | 1.1744 | 0.9805 | 0.6615 |
| 21.25 | 1.3806 | 1.3083 | 1.2074 | 1.2553 | 0.9091 | 1.1829 | 0.9878 | 0.6683 |
| 21.5  | 1.39   | 1.3184 | 1.2171 | 1.2698 | 0.9178 | 1.1906 | 0.9951 | 0.6766 |
| 21.75 | 1.3999 | 1.3289 | 1.2302 | 1.2828 | 0.9293 | 1.2037 | 1.0039 | 0.6845 |
| 22    | 1.4093 | 1.3395 | 1.2417 | 1.2949 | 0.9372 | 1.2116 | 1.0098 | 0.6917 |
| 22.25 | 1.4189 | 1.3493 | 1.2522 | 1.3082 | 0.9493 | 1.2223 | 1.0191 | 0.6999 |
| 22.5  | 1.4278 | 1.3589 | 1.2632 | 1.3194 | 0.9598 | 1.2316 | 1.0263 | 0.7078 |
| 22.75 | 1.4356 | 1.369  | 1.2744 | 1.3305 | 0.9692 | 1.2391 | 1.0333 | 0.7141 |
| 23    | 1.4425 | 1.3781 | 1.284  | 1.3431 | 0.9792 | 1.2485 | 1.042  | 0.7222 |
| 23.25 | 1.4488 | 1.3861 | 1.2951 | 1.3552 | 0.9892 | 1.257  | 1.0494 | 0.728  |
| 23.5  | 1.4527 | 1.3947 | 1.3048 | 1.3659 | 0.9991 | 1.2667 | 1.0556 | 0.7365 |
| 23.75 | 1.4559 | 1.4037 | 1.3145 | 1.3763 | 1.0084 | 1.2752 | 1.0637 | 0.7439 |
| 24    | 1.4583 | 1.4119 | 1.3242 | 1.3864 | 1.0175 | 1.2845 | 1.0707 | 0.751  |
| 24.25 | 1.4609 | 1.4188 | 1.334  | 1.3985 | 1.0272 | 1.2937 | 1.0807 | 0.7572 |
| 24.5  | 1.4615 | 1.4276 | 1.3423 | 1.4087 | 1.0373 | 1.3014 | 1.0863 | 0.7628 |
| 24.75 | 1.4635 | 1.4341 | 1.3533 | 1.4196 | 1.0457 | 1.3101 | 1.0942 | 0.7688 |
| 25    | 1.466  | 1.4379 | 1.3617 | 1.4299 | 1.054  | 1.3177 | 1.1023 | 0.7747 |
| 25.25 | 1.4669 | 1.4431 | 1.3711 | 1.438  | 1.0627 | 1.3269 | 1.1074 | 0.7818 |
| 25.5  | 1.4687 | 1.4476 | 1.3777 | 1.4481 | 1.0751 | 1.3358 | 1.1152 | 0.7899 |
| 25.75 | 1.4687 | 1.4518 | 1.3864 | 1.4572 | 1.0854 | 1.345  | 1.1216 | 0.7951 |
| 26    | 1.4682 | 1.453  | 1.3939 | 1.4652 | 1.093  | 1.3526 | 1.1298 | 0.7998 |
| 26.25 | 1.4704 | 1.4557 | 1.4015 | 1.4723 | 1.1026 | 1.3577 | 1.1374 | 0.8058 |
| 26.5  | 1.4702 | 1.4595 | 1.4102 | 1.4785 | 1.1104 | 1.368  | 1.1444 | 0.8129 |
| 26.75 | 1.4706 | 1.4619 | 1.4166 | 1.4833 | 1.1189 | 1.3756 | 1.1517 | 0.8138 |
| 27    | 1.4716 | 1.4639 | 1.4235 | 1.4884 | 1.1302 | 1.3808 | 1.1594 | 0.821  |
| 27.25 | 1.4725 | 1.4677 | 1.4299 | 1.4907 | 1.1375 | 1.3894 | 1.1675 | 0.8255 |
| 27.5  | 1.473  | 1.4709 | 1.4356 | 1.4936 | 1.1476 | 1.396  | 1.174  | 0.8312 |
| 27.75 | 1.4747 | 1.4735 | 1.438  | 1.4948 | 1.1567 | 1.4025 | 1.181  | 0.8363 |
| 28    | 1.4747 | 1.4758 | 1.4415 | 1.4957 | 1.166  | 1.4095 | 1.1883 | 0.8415 |

|       |        |        |        |        |        |        |        |        |
|-------|--------|--------|--------|--------|--------|--------|--------|--------|
| 28.25 | 1.4772 | 1.4784 | 1.4452 | 1.4974 | 1.1751 | 1.4156 | 1.1948 | 0.847  |
| 28.5  | 1.4758 | 1.4806 | 1.448  | 1.4993 | 1.1863 | 1.4201 | 1.2019 | 0.8521 |
| 28.75 | 1.4763 | 1.4813 | 1.4509 | 1.5005 | 1.194  | 1.4239 | 1.2084 | 0.8556 |
| 29    | 1.4771 | 1.4829 | 1.4542 | 1.5031 | 1.2035 | 1.4289 | 1.2171 | 0.8622 |
| 29.25 | 1.4786 | 1.485  | 1.4571 | 1.5055 | 1.2115 | 1.4341 | 1.2221 | 0.8659 |
| 29.5  | 1.4803 | 1.4861 | 1.4598 | 1.5087 | 1.2213 | 1.4367 | 1.2277 | 0.8724 |
| 29.75 | 1.4807 | 1.4866 | 1.4628 | 1.5112 | 1.2287 | 1.4387 | 1.2345 | 0.8762 |
| 30    | 1.4823 | 1.4892 | 1.4646 | 1.5135 | 1.2371 | 1.4412 | 1.2432 | 0.882  |
| 30.25 | 1.4831 | 1.49   | 1.4675 | 1.5156 | 1.2452 | 1.4444 | 1.2476 | 0.8857 |
| 30.5  | 1.4829 | 1.4913 | 1.4693 | 1.5176 | 1.2525 | 1.4444 | 1.2528 | 0.8927 |
| 30.75 | 1.4823 | 1.4923 | 1.4717 | 1.5187 | 1.2638 | 1.4446 | 1.2596 | 0.8953 |
| 31    | 1.4825 | 1.4929 | 1.4725 | 1.5208 | 1.2709 | 1.4466 | 1.2683 | 0.9023 |
| 31.25 | 1.4843 | 1.4939 | 1.4747 | 1.5215 | 1.2798 | 1.448  | 1.2735 | 0.9073 |
| 31.5  | 1.4842 | 1.496  | 1.4754 | 1.5232 | 1.2857 | 1.4475 | 1.2799 | 0.9119 |
| 31.75 | 1.4837 | 1.4956 | 1.4769 | 1.5254 | 1.2937 | 1.4475 | 1.2857 | 0.9181 |
| 32    | 1.4837 | 1.4964 | 1.4789 | 1.5263 | 1.301  | 1.4488 | 1.2915 | 0.921  |
| 32.25 | 1.4847 | 1.4969 | 1.4791 | 1.5275 | 1.3084 | 1.4483 | 1.2981 | 0.9257 |
| 32.5  | 1.4848 | 1.4964 | 1.48   | 1.5279 | 1.3151 | 1.448  | 1.3031 | 0.9304 |
| 32.75 | 1.4858 | 1.4974 | 1.4816 | 1.5303 | 1.3216 | 1.448  | 1.3094 | 0.9385 |
| 33    | 1.4867 | 1.4992 | 1.4807 | 1.5311 | 1.3309 | 1.4467 | 1.316  | 0.9427 |
| 33.25 | 1.4876 | 1.498  | 1.4819 | 1.5305 | 1.3376 | 1.4476 | 1.3193 | 0.9465 |
| 33.5  | 1.4885 | 1.4993 | 1.483  | 1.5319 | 1.3438 | 1.4481 | 1.3242 | 0.9541 |
| 33.75 | 1.4883 | 1.4994 | 1.4833 | 1.5318 | 1.3526 | 1.4469 | 1.3298 | 0.9581 |
| 34    | 1.4888 | 1.4988 | 1.4828 | 1.5331 | 1.3595 | 1.4474 | 1.3335 | 0.9619 |
| 34.25 | 1.4892 | 1.4995 | 1.4843 | 1.5341 | 1.3661 | 1.4471 | 1.3369 | 0.9676 |
| 34.5  | 1.4899 | 1.4996 | 1.4837 | 1.5362 | 1.3751 | 1.4474 | 1.3422 | 0.9717 |
| 34.75 | 1.4919 | 1.5003 | 1.4849 | 1.5368 | 1.3839 | 1.4472 | 1.3462 | 0.9781 |
| 35    | 1.492  | 1.5014 | 1.4849 | 1.537  | 1.3897 | 1.4486 | 1.3485 | 0.9828 |
| 35.25 | 1.4922 | 1.502  | 1.4853 | 1.5396 | 1.3961 | 1.4486 | 1.3517 | 0.9891 |
| 35.5  | 1.4933 | 1.5004 | 1.4855 | 1.5382 | 1.4035 | 1.4477 | 1.3535 | 0.994  |
| 35.75 | 1.4939 | 1.5019 | 1.485  | 1.5397 | 1.4099 | 1.4479 | 1.357  | 0.9974 |
| 36    | 1.4951 | 1.5018 | 1.4854 | 1.5398 | 1.4134 | 1.4476 | 1.3584 | 1.0012 |
| 36.25 | 1.4965 | 1.5015 | 1.4855 | 1.5412 | 1.4189 | 1.4469 | 1.3607 | 1.0061 |
| 36.5  | 1.4976 | 1.5021 | 1.4866 | 1.5428 | 1.424  | 1.4473 | 1.3614 | 1.0135 |
| 36.75 | 1.4983 | 1.5037 | 1.4853 | 1.544  | 1.428  | 1.4481 | 1.3622 | 1.0187 |
| 37    | 1.4992 | 1.5034 | 1.4858 | 1.5447 | 1.4312 | 1.4477 | 1.3621 | 1.0224 |
| 37.25 | 1.4997 | 1.504  | 1.4853 | 1.5455 | 1.4338 | 1.449  | 1.3632 | 1.027  |
| 37.5  | 1.5011 | 1.5037 | 1.4853 | 1.5459 | 1.4361 | 1.4489 | 1.3639 | 1.031  |
| 37.75 | 1.502  | 1.505  | 1.485  | 1.5474 | 1.4382 | 1.4486 | 1.3653 | 1.0369 |
| 38    | 1.5029 | 1.5047 | 1.4863 | 1.5486 | 1.4383 | 1.4475 | 1.366  | 1.043  |
| 38.25 | 1.5029 | 1.5046 | 1.4866 | 1.5501 | 1.4411 | 1.449  | 1.3659 | 1.0483 |
| 38.5  | 1.504  | 1.505  | 1.4863 | 1.5517 | 1.4425 | 1.4481 | 1.3658 | 1.0526 |

|       |        |        |        |        |        |        |        |        |
|-------|--------|--------|--------|--------|--------|--------|--------|--------|
| 38.75 | 1.5035 | 1.5042 | 1.4866 | 1.5525 | 1.4434 | 1.448  | 1.3667 | 1.0566 |
| 39    | 1.5042 | 1.505  | 1.4851 | 1.5533 | 1.4453 | 1.4488 | 1.3669 | 1.0609 |
| 39.25 | 1.5058 | 1.5049 | 1.486  | 1.5536 | 1.445  | 1.4482 | 1.367  | 1.065  |
| 39.5  | 1.507  | 1.5052 | 1.4864 | 1.5547 | 1.4474 | 1.4485 | 1.3685 | 1.0714 |
| 39.75 | 1.5073 | 1.506  | 1.4865 | 1.5557 | 1.4499 | 1.4484 | 1.3671 | 1.0767 |
| 40    | 1.5077 | 1.5062 | 1.4862 | 1.558  | 1.4524 | 1.4489 | 1.368  | 1.0804 |
| 40.25 | 1.5093 | 1.5063 | 1.4869 | 1.5592 | 1.453  | 1.4496 | 1.3673 | 1.0833 |
| 40.5  | 1.5096 | 1.506  | 1.4858 | 1.5601 | 1.4549 | 1.4489 | 1.3684 | 1.0875 |
| 40.75 | 1.5108 | 1.5059 | 1.4857 | 1.5621 | 1.4568 | 1.4494 | 1.369  | 1.0921 |
| 41    | 1.5129 | 1.5053 | 1.4873 | 1.5618 | 1.4588 | 1.4485 | 1.3691 | 1.0968 |
| 41.25 | 1.5127 | 1.5048 | 1.4861 | 1.5619 | 1.4617 | 1.4491 | 1.369  | 1.1031 |
| 41.5  | 1.513  | 1.5052 | 1.486  | 1.5633 | 1.4637 | 1.4495 | 1.3701 | 1.1078 |
| 41.75 | 1.513  | 1.5045 | 1.4871 | 1.5636 | 1.4642 | 1.4496 | 1.3696 | 1.1107 |
| 42    | 1.5143 | 1.506  | 1.4853 | 1.5666 | 1.4653 | 1.4492 | 1.3694 | 1.1158 |
| 42.25 | 1.5164 | 1.506  | 1.4866 | 1.5675 | 1.4674 | 1.4512 | 1.3698 | 1.1205 |
| 42.5  | 1.5166 | 1.5062 | 1.4867 | 1.5676 | 1.4689 | 1.4516 | 1.3706 | 1.1243 |
| 42.75 | 1.518  | 1.506  | 1.4869 | 1.5686 | 1.4698 | 1.4518 | 1.3706 | 1.1279 |
| 43    | 1.5154 | 1.5053 | 1.488  | 1.5696 | 1.4701 | 1.4522 | 1.3711 | 1.1313 |
| 43.25 | 1.5129 | 1.5059 | 1.4873 | 1.5712 | 1.4712 | 1.4522 | 1.3715 | 1.1358 |
| 43.5  | 1.5111 | 1.5064 | 1.4862 | 1.5723 | 1.4728 | 1.4527 | 1.3711 | 1.1394 |
| 43.75 | 1.5114 | 1.5084 | 1.4869 | 1.5732 | 1.4736 | 1.453  | 1.3727 | 1.1447 |
| 44    | 1.5125 | 1.5078 | 1.4873 | 1.5738 | 1.4743 | 1.4529 | 1.372  | 1.1502 |
| 44.25 | 1.5102 | 1.5073 | 1.4871 | 1.5748 | 1.4762 | 1.4529 | 1.3734 | 1.1554 |
| 44.5  | 1.5105 | 1.5065 | 1.4865 | 1.5756 | 1.4771 | 1.4523 | 1.3731 | 1.1593 |
| 44.75 | 1.5104 | 1.5065 | 1.4859 | 1.5773 | 1.4783 | 1.454  | 1.3727 | 1.163  |
| 45    | 1.5092 | 1.5064 | 1.4855 | 1.5771 | 1.4784 | 1.4543 | 1.3725 | 1.1666 |
| 45.25 | 1.5105 | 1.5057 | 1.4855 | 1.5785 | 1.4794 | 1.4541 | 1.3721 | 1.17   |
| 45.5  | 1.5103 | 1.5065 | 1.4862 | 1.5796 | 1.4809 | 1.4557 | 1.3729 | 1.1733 |
| 45.75 | 1.51   | 1.5067 | 1.4861 | 1.5804 | 1.4816 | 1.4559 | 1.3729 | 1.1756 |
| 46    | 1.5108 | 1.5061 | 1.4849 | 1.5817 | 1.4814 | 1.4561 | 1.3737 | 1.18   |
| 46.25 | 1.5109 | 1.5064 | 1.4844 | 1.5834 | 1.4835 | 1.456  | 1.3736 | 1.1839 |
| 46.5  | 1.511  | 1.5069 | 1.4852 | 1.5845 | 1.4851 | 1.4571 | 1.3749 | 1.1885 |
| 46.75 | 1.511  | 1.5052 | 1.4848 | 1.5843 | 1.4857 | 1.4577 | 1.3745 | 1.1921 |
| 47    | 1.5111 | 1.5059 | 1.4843 | 1.586  | 1.487  | 1.4574 | 1.3744 | 1.1965 |
| 47.25 | 1.5102 | 1.5042 | 1.485  | 1.5867 | 1.4861 | 1.4571 | 1.3748 | 1.2033 |
| 47.5  | 1.5112 | 1.5044 | 1.484  | 1.5878 | 1.4872 | 1.4583 | 1.3749 | 1.2062 |
| 47.75 | 1.5109 | 1.5036 | 1.4847 | 1.5876 | 1.4894 | 1.4575 | 1.3756 | 1.2118 |
| 48    | 1.511  | 1.5046 | 1.4836 | 1.5888 | 1.4909 | 1.4582 | 1.3756 | 1.2153 |
| 48.25 | 1.511  | 1.5042 | 1.4836 | 1.5899 | 1.4919 | 1.4587 | 1.3758 | 1.2177 |
| 48.5  | 1.5111 | 1.504  | 1.4834 | 1.5906 | 1.4927 | 1.4592 | 1.3761 | 1.221  |
| 48.75 | 1.5107 | 1.5019 | 1.4832 | 1.5913 | 1.4922 | 1.4578 | 1.3763 | 1.2245 |
| 49    | 1.5112 | 1.5026 | 1.4846 | 1.5932 | 1.4943 | 1.4586 | 1.3757 | 1.228  |

|       |        |        |        |        |        |        |        |        |
|-------|--------|--------|--------|--------|--------|--------|--------|--------|
| 49.25 | 1.5109 | 1.5034 | 1.4839 | 1.594  | 1.496  | 1.4604 | 1.3761 | 1.23   |
| 49.5  | 1.5094 | 1.504  | 1.4834 | 1.5948 | 1.497  | 1.4603 | 1.3759 | 1.2324 |
| 49.75 | 1.5105 | 1.5038 | 1.4835 | 1.5966 | 1.4992 | 1.4602 | 1.3769 | 1.2382 |

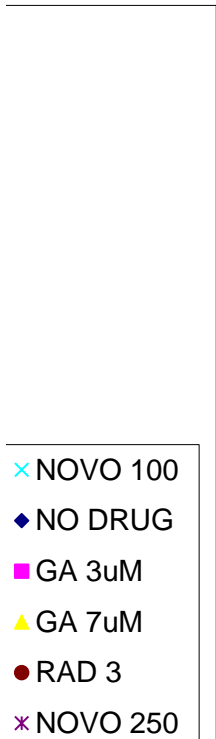



+ RAD 10

- RAD 30
