# Supplementary material
Source: PubMed Central journal article supplement (PMC6521697)
Supplement: NIHMS1013385-supplement-Table_S2.pdf [file NIHMS1013385-supplement-Table_S2.pdf]

| PLATE   | X3        | 5_Euclidea | 5_Euclidea | 5_Euclidea | 5_KS_p-va | 5_KS_stat | 5_KS_z-pri | 5_QFD_p-\ | 5_QFD_sta | 5_QFD_z-ç | 5_SAM_p- | 5_SAM_stz | 5_SAM_z-ç | 15_Euclide |
|---------|-----------|------------|------------|------------|-----------|-----------|------------|-----------|-----------|-----------|----------|-----------|-----------|------------|
| PLATE 1 | 1 WT      | 0.003322   | 0.022664   | -0.15429   | 0.003322  | 0.058615  | -0.286     | 0.003322  | 0.044815  | -0.40232  | 0.003322 | 0.023942  | 0.373815  | 0.003322   |
|         | 2 YAL035W | 0.003322   | 0.012053   | -0.65435   | 0.003322  | 0.029506  | -0.63641   | 0.003322  | 0.024129  | -0.79995  | 0.003322 | 0.009198  | -0.29388  | 0.003322   |
|         | 3 YBL008W | 0.003322   | 0.038028   | 0.070814   | 0.003322  | 0.082689  | -0.25134   | 0.003322  | 0.069793  | -0.32962  | 0.003322 | 0.056917  | 0.547793  | 0.003322   |
|         | 4 YGR285C | 0.003322   | 0.025016   | 0.037179   | 0.003322  | 0.094796  | 0.237204   | 0.003322  | 0.093059  | 0.244339  | 0.003322 | 0.026959  | 0.506116  | 0.003322   |
|         | 5 YNL064C | 0.003322   | 0.003034   | -1.67397   | 0.169435  | 0.00308   | -2.60894   | 0.126246  | 0.002757  | -2.42525  | 0.003322 | 0.002328  | -2.13904  | 0.003322   |
|         | 6 YOL018C | 0.003322   | 0.023943   | -0.47599   | 0.003322  | 0.055485  | -1.03457   | 0.003322  | 0.047103  | -1.05164  | 0.003322 | 0.03276   | -0.02226  | 0.006645   |
|         | 7 YOL086C | 0.0299     | 0.004883   | -1.71434   | 0.023256  | 0.01892   | -2.08928   | 0.033223  | 0.020597  | -2.37701  | 0.112957 | 0.00493   | -2.84305  | 0.003322   |
|         | 8 YPL106C | 0.003322   | 0.017828   | -0.66305   | 0.003322  | 0.047707  | -0.74969   | 0.003322  | 0.046247  | -0.71683  | 0.003322 | 0.02142   | -0.29333  | 0.003322   |
| PLATE 2 | 1 WT      | 0.003322   | 0.016549   | -0.00066   | 0.003322  | 0.042893  | -0.14032   | 0.003322  | 0.031856  | -0.27604  | 0.003322 | 0.012406  | 0.524115  | 0.003322   |
|         | 2 YBR131W | 0.003322   | 0.018768   | -0.70234   | 0.003322  | 0.047845  | -1.18348   | 0.003322  | 0.039716  | -1.21003  | 0.003322 | 0.020459  | -0.45765  | 0.006645   |
|         | 3 YIL170W | 0.003322   | 0.025147   | -0.17276   | 0.003322  | 0.060528  | -0.41449   | 0.003322  | 0.047032  | -0.46539  | 0.003322 | 0.026049  | 0.373947  | 0.003322   |
|         | 4 YNL077W | 0.003322   | 0.014823   | -0.40903   | 0.003322  | 0.041695  | -0.54123   | 0.003322  | 0.031386  | -0.51318  | 0.003322 | 0.010394  | 0.081634  | 0.003322   |
|         | 5 YNL098C | 0.003322   | 0.059416   | 0.334262   | 0.003322  | 0.143749  | 0.298599   | 0.003322  | 0.115081  | 0.21789   | 0.003322 | 0.112648  | 0.705093  | 0.003322   |
|         | 6 YNL127W | 0.003322   | 0.019057   | -0.59037   | 0.003322  | 0.043857  | -0.90137   | 0.003322  | 0.034104  | -0.8356   | 0.003322 | 0.015679  | -0.47118  | 0.003322   |
|         | 7 YPL036W | 0.003322   | 0.0193     | -0.32084   | 0.003322  | 0.067038  | -0.32637   | 0.003322  | 0.052901  | -0.34056  | 0.003322 | 0.017496  | 0.165724  | 0.003322   |
|         | 8 YPL193W | 0.003322   | 0.003356   | -1.57986   | 0.009967  | 0.004005  | -2.00815   | 0.006645  | 0.00301   | -1.92263  | 0.003322 | 0.001346  | -2.64664  | 0.003322   |
| PLATE 3 | 1 WT      | 0.003322   | 0.013823   | -0.70009   | 0.003322  | 0.034662  | -0.65498   | 0.003322  | 0.027343  | -0.54864  | 0.003322 | 0.01349   | -0.40449  | 0.003322   |
|         | 2 YCR028C | 0.006645   | 0.005457   | -2.36459   | 0.026578  | 0.012837  | -2.99674   | 0.0299    | 0.011648  | -3.19705  | 0.009967 | 0.003437  | -3.68661  | 0.009967   |
|         | 3 YDR283C | 0.003322   | 0.017003   | -0.71163   | 0.003322  | 0.040941  | -0.11555   | 0.003322  | 0.03011   | -0.08396  | 0.003322 | 0.017613  | -0.44826  | 0.003322   |
|         | 4 YGR053C | 0.003322   | 0.012279   | -0.58307   | 0.003322  | 0.034493  | -0.21066   | 0.003322  | 0.027219  | -0.08678  | 0.003322 | 0.008423  | -0.20356  | 0.003322   |
|         | 5 YIL121W | 0.003322   | 0.014672   | -0.78177   | 0.003322  | 0.029677  | -1.24636   | 0.003322  | 0.022703  | -1.31217  | 0.003322 | 0.015009  | -0.56396  | 0.003322   |
|         | 6 YLR452C | 0.003322   | 0.015993   | -0.38742   | 0.003322  | 0.04268   | -0.24075   | 0.003322  | 0.033723  | -0.24164  | 0.003322 | 0.015205  | 0.02731   | 0.003322   |
|         | 7 YML071C | 0.003322   | 0.023911   | -0.01445   | 0.003322  | 0.07514   | 0.223042   | 0.003322  | 0.05823   | 0.297425  | 0.003322 | 0.020893  | 0.480626  | 0.003322   |
|         | 8 YML116W | 0.003322   | 0.011422   | -1.31752   | 0.003322  | 0.0304    | -0.65441   | 0.003322  | 0.024362  | -0.40357  | 0.003322 | 0.011294  | -1.53657  | 0.003322   |
| PLATE 4 | 1 WT      | 0.003322   | 0.007955   | -1.18718   | 0.003322  | 0.017438  | -1.11332   | 0.003322  | 0.014789  | -0.9483   | 0.003322 | 0.006394  | -1.38893  | 0.003322   |
|         | 2 YGL005C | 0.003322   | 0.01491    | 0.019629   | 0.003322  | 0.050737  | 0.240543   | 0.003322  | 0.039636  | 0.326441  | 0.003322 | 0.008879  | 0.524996  | 0.003322   |
|         | 3 YGL025C | 0.003322   | 0.017777   | -1.10896   | 0.003322  | 0.049026  | -1.14556   | 0.003322  | 0.035107  | -1.29763  | 0.003322 | 0.013875  | -1.84914  | 0.003322   |
|         | 4 YGR235C | 0.003322   | 0.014783   | -0.5923    | 0.003322  | 0.043472  | -0.01938   | 0.003322  | 0.03403   | 0.001086  | 0.003322 | 0.012417  | -0.2301   | 0.003322   |
|         | 5 YGR236C | 0.003322   | 0.010285   | -0.79654   | 0.003322  | 0.018875  | -0.62045   | 0.003322  | 0.015611  | -0.26849  | 0.003322 | 0.007261  | -0.55299  | 0.003322   |
|         | 6 YJR073C | 0.003322   | 0.022464   | 0.076522   | 0.003322  | 0.062995  | 0.002144   | 0.003322  | 0.045185  | 0.048446  | 0.003322 | 0.019191  | 0.577767  | 0.003322   |
|         | 7 YML123C | 0.003322   | 0.008042   | -0.57299   | 0.003322  | 0.025154  | -0.30217   | 0.003322  | 0.018896  | -0.23803  | 0.003322 | 0.004155  | -0.19143  | 0.006645   |
|         | 8 YMR095C | 0.003322   | 0.022906   | 0.040503   | 0.003322  | 0.074058  | 0.112045   | 0.003322  | 0.057871  | 0.160342  | 0.003322 | 0.023044  | 0.494259  | 0.003322   |
| PLATE 5 | X3        | 5_Euclidea | 5_Euclidea | 5_Euclidea | 5_KS_p-va | 5_KS_stat | 5_KS_z-pri | 5_QFD_p-\ | 5_QFD_sta | 5_QFD_z-ç | 5_SAM_p- | 5_SAM_stz | 5_SAM_z-ç | 15_Euclide |

|                |         |            |            |            |           |           |            |           |           |           |          |          |           |             |
|----------------|---------|------------|------------|------------|-----------|-----------|------------|-----------|-----------|-----------|----------|----------|-----------|-------------|
| 1              | WT      | 0.003322   | 0.005878   | -0.7249    | 0.003322  | 0.01241   | -1.53779   | 0.003322  | 0.007779  | -1.87827  | 0.003322 | 0.003093 | -0.3709   | 0.003322    |
| 2              | YFR035C | 0.003322   | 0.004123   | -1.50256   | 0.003322  | 0.016116  | -1.81993   | 0.003322  | 0.011799  | -2.00462  | 0.003322 | 0.002072 | -1.87072  | 0.003322    |
| 3              | YGR243W | 0.003322   | 0.012047   | 0.088519   | 0.003322  | 0.020908  | -0.42061   | 0.003322  | 0.01635   | -0.56602  | 0.003322 | 0.006541 | 0.554279  | 0.003322    |
| 4              | YIL041W | 0.003322   | 0.005569   | -0.66192   | 0.003322  | 0.010718  | -1.66385   | 0.003322  | 0.006704  | -2.34954  | 0.003322 | 0.002286 | -0.32088  | 0.023256    |
| 5              | YIL053W | 0.003322   | 0.006248   | -0.4409    | 0.003322  | 0.017251  | -0.07464   | 0.003322  | 0.01479   | -0.01565  | 0.003322 | 0.002088 | -0.00381  | 0.003322    |
| 6              | YIR019C | 0.003322   | 0.01667    | 0.367963   | 0.003322  | 0.038358  | 0.151616   | 0.003322  | 0.029425  | 0.09598   | 0.003322 | 0.009648 | 0.812944  | 0.003322    |
| 7              | YJL106W | 0.003322   | 0.007345   | -0.49921   | 0.003322  | 0.029338  | -0.14216   | 0.003322  | 0.021853  | -0.12852  | 0.003322 | 0.003168 | -0.12775  | 0.003322    |
| 8              | YMR063W | 0.003322   | 0.00743    | -0.6241    | 0.003322  | 0.02351   | -0.38004   | 0.003322  | 0.01864   | -0.42182  | 0.003322 | 0.003223 | -0.30856  | 0.003322    |
| <b>PLATE 6</b> | X3      | 5_Euclidea | 5_Euclidea | 5_Euclidea | 5_KS_p-va | 5_KS_stat | 5_KS_z-pri | 5_QFD_p-v | 5_QFD_sta | 5_QFD_z-p | 5_SAM_p- | 5_SAM_st | 5_SAM_z-p | 15_Euclidea |
| 1              | EMPTY   | 0.049834   | 0.000154   | -2.45458   | 0.099668  | 0.000341  | -2.64816   | 0.162791  | 0.000212  | -2.69855  | 0.059801 | 1.29E-05 | -4.1457   | 0.036545    |
| 2              | WT      | 0.003322   | 0.008664   | -0.47497   | 0.003322  | 0.016222  | -0.94526   | 0.003322  | 0.011234  | -1.1029   | 0.003322 | 0.003181 | -0.07609  | 0.016611    |
| 3              | YGL253W | 0.003322   | 0.008852   | -0.17988   | 0.003322  | 0.013847  | -0.60504   | 0.003322  | 0.009331  | -0.59909  | 0.003322 | 0.003808 | 0.306744  | 0.003322    |
| 4              | YHL027W | 0.003322   | 0.00799    | -0.38741   | 0.003322  | 0.033126  | -0.01679   | 0.003322  | 0.031165  | 0.096686  | 0.003322 | 0.003506 | -0.00108  | 0.013289    |
| 5              | YJL179W | 0.003322   | 0.015506   | -2.19977   | 0.003322  | 0.035442  | -3.11231   | 0.003322  | 0.026009  | -3.20033  | 0.003322 | 0.009609 | -4.68983  | 0.003322    |
| 6              | YKL037W | 0.003322   | 0.007446   | 0.042404   | 0.003322  | 0.025621  | 0.086941   | 0.003322  | 0.019625  | -0.03755  | 0.003322 | 0.002227 | 0.569067  | 0.003322    |
| 7              | YNL197C | 0.003322   | 0.012072   | -0.00738   | 0.003322  | 0.037489  | 0.128847   | 0.003322  | 0.029224  | 0.166768  | 0.003322 | 0.006402 | 0.456397  | 0.069767    |
| 8              | YNL322C | 0.003322   | 0.01615    | 0.273182   | 0.003322  | 0.051229  | 0.301774   | 0.003322  | 0.038851  | 0.28426   | 0.003322 | 0.009345 | 0.69091   | 0.003322    |

| 15_Euclide | 15_Euclide | 15_KS_p-v | 15_KS_sta | 15_KS_z-p | 15_QFD_p | 15_QFD_sl | 15_QFD_z- | 15_SAM_p | 15_SAM_s | 15_SAM_z-prime |
|------------|------------|-----------|-----------|-----------|----------|-----------|-----------|----------|----------|----------------|
| 0.030761   | -0.81864   | 0.003322  | 0.077433  | -0.92687  | 0.003322 | 0.072281  | -0.97347  | 0.003322 | 0.047169 | -0.56955       |
| 0.011795   | -0.97575   | 0.003322  | 0.019683  | -1.12183  | 0.009967 | 0.020628  | -1.17592  | 0.003322 | 0.01416  | -0.851         |
| 0.080822   | 0.185281   | 0.003322  | 0.29327   | 0.461845  | 0.003322 | 0.301201  | 0.476806  | 0.003322 | 0.222894 | 0.658763       |
| 0.02136    | -0.7178    | 0.003322  | 0.052917  | -0.85291  | 0.003322 | 0.045346  | -0.91119  | 0.003322 | 0.026373 | -0.83294       |
| 0.006805   | -0.80407   | 0.003322  | 0.009655  | -1.60907  | 0.003322 | 0.008863  | -1.6405   | 0.003322 | 0.004392 | -0.48706       |
| 0.030172   | -1.36339   | 0.006645  | 0.096099  | -1.44583  | 0.006645 | 0.099719  | -1.54442  | 0.006645 | 0.079711 | -1.48869       |
| 0.02359    | -1.74075   | 0.003322  | 0.058979  | -3.03157  | 0.003322 | 0.050245  | -3.33863  | 0.003322 | 0.040667 | -2.47341       |
| 0.050712   | -0.29063   | 0.003322  | 0.152789  | 0.108816  | 0.003322 | 0.165286  | 0.323921  | 0.003322 | 0.115472 | 0.145677       |
| 15_Euclide | 15_Euclide | 15_KS_p-v | 15_KS_sta | 15_KS_z-p | 15_QFD_p | 15_QFD_sl | 15_QFD_z- | 15_SAM_p | 15_SAM_s | 15_SAM_z-prime |
| 0.021507   | -0.39968   | 0.003322  | 0.040156  | -1.02485  | 0.003322 | 0.031569  | -1.12697  | 0.003322 | 0.021334 | 0.136736       |
| 0.012603   | -1.55343   | 0.425249  | 0.037614  | -1.75263  | 0.448505 | 0.03598   | -1.82015  | 0.096346 | 0.02436  | -2.43579       |
| 0.026066   | -0.16029   | 0.003322  | 0.056779  | -0.3927   | 0.003322 | 0.041617  | -0.55715  | 0.003322 | 0.027687 | 0.350501       |
| 0.011378   | -0.97103   | 0.003322  | 0.023052  | -1.31954  | 0.003322 | 0.016157  | -1.53889  | 0.003322 | 0.010726 | -0.77848       |
| 0.023956   | -0.70612   | 0.003322  | 0.069036  | -0.75041  | 0.003322 | 0.079754  | -0.59507  | 0.003322 | 0.058274 | -0.3312        |
| 0.022572   | -0.30614   | 0.003322  | 0.040308  | -0.65927  | 0.003322 | 0.036232  | -0.61543  | 0.003322 | 0.022863 | 0.165515       |
| 0.032397   | -0.0582    | 0.003322  | 0.065581  | -0.57355  | 0.003322 | 0.044562  | -0.95917  | 0.003322 | 0.037262 | 0.452075       |
| 0.012087   | -0.71726   | 0.003322  | 0.023203  | -1.37358  | 0.003322 | 0.017581  | -1.6485   | 0.003322 | 0.008959 | -0.34032       |
| 15_Euclide | 15_Euclide | 15_KS_p-v | 15_KS_sta | 15_KS_z-p | 15_QFD_p | 15_QFD_sl | 15_QFD_z- | 15_SAM_p | 15_SAM_s | 15_SAM_z-prime |
| 0.015155   | -0.69944   | 0.003322  | 0.035733  | -0.99228  | 0.003322 | 0.026295  | -0.98276  | 0.003322 | 0.016182 | -0.34843       |
| 0.009139   | -2.87568   | 0.009967  | 0.030647  | -3.23638  | 0.006645 | 0.022773  | -3.98755  | 0.0299   | 0.01017  | -4.61804       |
| 0.017435   | -0.80519   | 0.003322  | 0.035822  | -1.15757  | 0.003322 | 0.025836  | -1.3443   | 0.003322 | 0.021753 | -0.5872        |
| 0.009445   | -1.58927   | 0.003322  | 0.024102  | -1.43615  | 0.003322 | 0.017935  | -1.36273  | 0.003322 | 0.011643 | -2.11152       |
| 0.02259    | -0.78314   | 0.003322  | 0.042476  | -0.45761  | 0.003322 | 0.033747  | -0.58868  | 0.003322 | 0.031237 | -0.75056       |
| 0.01473    | -1.23826   | 0.003322  | 0.028374  | -1.78765  | 0.003322 | 0.022521  | -1.82296  | 0.003322 | 0.017943 | -1.32978       |
| 0.025281   | -0.2316    | 0.003322  | 0.059717  | 0.032034  | 0.003322 | 0.042361  | -0.00531  | 0.003322 | 0.028489 | 0.222298       |
| 0.019727   | -0.95014   | 0.003322  | 0.049199  | -0.77151  | 0.003322 | 0.035833  | -0.7354   | 0.003322 | 0.029417 | -0.71952       |
| 15_Euclide | 15_Euclide | 15_KS_p-v | 15_KS_sta | 15_KS_z-p | 15_QFD_p | 15_QFD_sl | 15_QFD_z- | 15_SAM_p | 15_SAM_s | 15_SAM_z-prime |
| 0.015939   | -0.83216   | 0.003322  | 0.027341  | -0.62379  | 0.003322 | 0.019625  | -0.52013  | 0.003322 | 0.019016 | -0.59566       |
| 0.018165   | -2.08635   | 0.003322  | 0.042508  | -1.86488  | 0.003322 | 0.026299  | -2.18515  | 0.003322 | 0.020974 | -3.61228       |
| 0.026783   | -1.52149   | 0.003322  | 0.038074  | -2.30271  | 0.003322 | 0.024055  | -2.36729  | 0.003322 | 0.034708 | -2.40337       |
| 0.013968   | -1.16405   | 0.003322  | 0.026761  | -1.02469  | 0.003322 | 0.01617   | -0.99624  | 0.003322 | 0.014135 | -1.41834       |
| 0.015985   | -1.17515   | 0.003322  | 0.020107  | -1.00879  | 0.003322 | 0.01511   | -0.83965  | 0.003322 | 0.017018 | -1.22775       |
| 0.021103   | -0.47817   | 0.003322  | 0.031973  | -1.35756  | 0.003322 | 0.026129  | -1.50401  | 0.003322 | 0.023359 | -0.1           |
| 0.008764   | -2.00967   | 0.003322  | 0.015583  | -1.52782  | 0.006645 | 0.009477  | -1.57937  | 0.006645 | 0.008049 | -3.25147       |
| 0.021088   | -0.41289   | 0.003322  | 0.035025  | -0.87986  | 0.003322 | 0.029163  | -0.67481  | 0.003322 | 0.027328 | 0.041577       |
| 15_Euclide | 15_Euclide | 15_KS_p-v | 15_KS_sta | 15_KS_z-p | 15_QFD_p | 15_QFD_sl | 15_QFD_z- | 15_SAM_p | 15_SAM_s | 15_SAM_z-prime |

|            |            |           |           |           |          |           |           |          |          |                |
|------------|------------|-----------|-----------|-----------|----------|-----------|-----------|----------|----------|----------------|
| 0.007192   | -1.46352   | 0.006645  | 0.016979  | -2.28976  | 0.026578 | 0.009621  | -2.94593  | 0.003322 | 0.005447 | -1.90898       |
| 0.015956   | -0.73246   | 0.003322  | 0.057131  | -0.73132  | 0.003322 | 0.055514  | -0.65898  | 0.003322 | 0.017912 | -0.62927       |
| 0.012478   | -0.84209   | 0.003322  | 0.046013  | -0.76704  | 0.003322 | 0.040973  | -0.80263  | 0.003322 | 0.011114 | -0.72805       |
| 0.002126   | -1.97041   | 0.215947  | 0.003753  | -3.07603  | 0.833887 | 0.000649  | -3.70304  | 0.023256 | 0.00151  | -2.80909       |
| 0.008405   | -1.11026   | 0.003322  | 0.033975  | -0.97679  | 0.003322 | 0.026207  | -1.13006  | 0.003322 | 0.006479 | -1.15775       |
| 0.015608   | -0.03574   | 0.003322  | 0.057981  | 0.12969   | 0.003322 | 0.043842  | 0.122526  | 0.003322 | 0.010794 | 0.457845       |
| 0.01217    | -0.73195   | 0.003322  | 0.048207  | -0.71054  | 0.003322 | 0.039657  | -0.79394  | 0.003322 | 0.009989 | -0.74          |
| 0.014433   | -0.70916   | 0.003322  | 0.053029  | -0.23737  | 0.003322 | 0.040709  | -0.34197  | 0.003322 | 0.012247 | -0.54916       |
| 15_Euclide | 15_Euclide | 15_KS_p-v | 15_KS_sta | 15_KS_z-p | 15_QFD_p | 15_QFD_sl | 15_QFD_z- | 15_SAM_p | 15_SAM_s | 15_SAM_z-prime |
| 0.000122   | -1.40683   | 0.122924  | 0.00026   | -2.00315  | 0.053156 | 0.000402  | -2.44034  | 0.086379 | 8.34E-06 | -1.80152       |
| 0.004054   | -2.92584   | 0.129568  | 0.010094  | -3.33488  | 0.355482 | 0.006332  | -3.73281  | 0.016611 | 0.00456  | -5.35101       |
| 0.006151   | -1.63176   | 0.003322  | 0.02322   | -1.84211  | 0.003322 | 0.019507  | -1.95498  | 0.003322 | 0.004204 | -2.14105       |
| 0.009126   | -1.89173   | 0.016611  | 0.033976  | -1.92587  | 0.023256 | 0.028626  | -2.00942  | 0.019934 | 0.011222 | -2.53201       |
| 0.016129   | 0.00986    | 0.003322  | 0.059246  | 0.07609   | 0.003322 | 0.047274  | -0.00756  | 0.003322 | 0.010746 | 0.516765       |
| 0.024887   | -0.21382   | 0.003322  | 0.090448  | -0.12722  | 0.003322 | 0.075951  | -0.16453  | 0.003322 | 0.027794 | 0.231761       |
| 0.001523   | -2.03266   | 0.272425  | 0.002564  | -2.29587  | 0.418605 | 0.001724  | -2.50478  | 0.112957 | 0.0009   | -3.00438       |
| 0.018201   | -0.08585   | 0.003322  | 0.032958  | -0.78025  | 0.003322 | 0.02835   | -0.80699  | 0.003322 | 0.013199 | 0.469316       |

| PLATE   | X3        | 5_QFD_p  | 5_QFD_st | 5_QFD_z-prime | 15_QFD_p | 15_QFD_st | 15_QFD_z-prime |
|---------|-----------|----------|----------|---------------|----------|-----------|----------------|
| PLATE 1 | 1 WT      | 0.003322 | 0.044815 | -0.40232      | 0.003322 | 0.072281  | -0.97347       |
|         | 2 YAL035W | 0.003322 | 0.024129 | -0.79995      | 0.009967 | 0.020628  | -1.17592       |
|         | 3 YBL008W | 0.003322 | 0.069793 | -0.32962      | 0.003322 | 0.301201  | 0.476806       |
|         | 4 YGR285C | 0.003322 | 0.093059 | 0.244339      | 0.003322 | 0.045346  | -0.91119       |
|         | 5 YNL064C | 0.126246 | 0.002757 | -2.42525      | 0.003322 | 0.008863  | -1.6405        |
|         | 6 YOL018C | 0.003322 | 0.047103 | -1.05164      | 0.006645 | 0.099719  | -1.54442       |
|         | 7 YOL086C | 0.033223 | 0.020597 | -2.37701      | 0.003322 | 0.050245  | -3.33863       |
|         | 8 YPL106C | 0.003322 | 0.046247 | -0.71683      | 0.003322 | 0.165286  | 0.323921       |
| PLATE 2 | 1 WT      | 0.003322 | 0.031856 | -0.27604      | 0.003322 | 0.031569  | -1.12697       |
|         | 2 YBR131W | 0.003322 | 0.039716 | -1.21003      | 0.448505 | 0.03598   | -1.82015       |
|         | 3 YIL170W | 0.003322 | 0.047032 | -0.46539      | 0.003322 | 0.041617  | -0.55715       |
|         | 4 YNL077W | 0.003322 | 0.031386 | -0.51318      | 0.003322 | 0.016157  | -1.53889       |
|         | 5 YNL098C | 0.003322 | 0.115081 | 0.21789       | 0.003322 | 0.079754  | -0.59507       |
|         | 6 YNL127W | 0.003322 | 0.034104 | -0.8356       | 0.003322 | 0.036232  | -0.61543       |
|         | 7 YPL036W | 0.003322 | 0.052901 | -0.34056      | 0.003322 | 0.044562  | -0.95917       |
|         | 8 YPL193W | 0.006645 | 0.00301  | -1.92263      | 0.003322 | 0.017581  | -1.6485        |
| PLATE 3 | 1 WT      | 0.003322 | 0.027343 | -0.54864      | 0.003322 | 0.026295  | -0.98276       |
|         | 2 YCR028C | 0.0299   | 0.011648 | -3.19705      | 0.006645 | 0.022773  | -3.98755       |
|         | 3 YDR283C | 0.003322 | 0.03011  | -0.08396      | 0.003322 | 0.025836  | -1.3443        |
|         | 4 YGR053C | 0.003322 | 0.027219 | -0.08678      | 0.003322 | 0.017935  | -1.36273       |
|         | 5 YIL121W | 0.003322 | 0.022703 | -1.31217      | 0.003322 | 0.033747  | -0.58868       |
|         | 6 YLR452C | 0.003322 | 0.033723 | -0.24164      | 0.003322 | 0.022521  | -1.82296       |
|         | 7 YML071C | 0.003322 | 0.05823  | 0.297425      | 0.003322 | 0.042361  | -0.00531       |
|         | 8 YML116W | 0.003322 | 0.024362 | -0.40357      | 0.003322 | 0.035833  | -0.7354        |
| PLATE 4 | 1 WT      | 0.003322 | 0.014789 | -0.9483       | 0.003322 | 0.019625  | -0.52013       |
|         | 2 YGL005C | 0.003322 | 0.039636 | 0.326441      | 0.003322 | 0.026299  | -2.18515       |
|         | 3 YGL025C | 0.003322 | 0.035107 | -1.29763      | 0.003322 | 0.024055  | -2.36729       |
|         | 4 YGR235C | 0.003322 | 0.03403  | 0.001086      | 0.003322 | 0.01617   | -0.99624       |
|         | 5 YGR236C | 0.003322 | 0.015611 | -0.26849      | 0.003322 | 0.01511   | -0.83965       |
|         | 6 YJR073C | 0.003322 | 0.045185 | 0.048446      | 0.003322 | 0.026129  | -1.50401       |
|         | 7 YML123C | 0.003322 | 0.018896 | -0.23803      | 0.006645 | 0.009477  | -1.57937       |
|         | 8 YMR095C | 0.003322 | 0.057871 | 0.160342      | 0.003322 | 0.029163  | -0.67481       |
| PLATE 5 | X3        | 5_QFD_p  | 5_QFD_st | 5_QFD_z-prime | 15_QFD_p | 15_QFD_st | 15_QFD_z-prime |

Criteria

p-value: <0.1  
z-prime >0  
stat

Strains that satisfy the criteria

|   |         |          |          |          |          |          |          |
|---|---------|----------|----------|----------|----------|----------|----------|
| 1 | WT      | 0.003322 | 0.007779 | -1.87827 | 0.026578 | 0.009621 | -2.94593 |
| 2 | YFR035C | 0.003322 | 0.011799 | -2.00462 | 0.003322 | 0.055514 | -0.65898 |
| 3 | YGR243W | 0.003322 | 0.01635  | -0.56602 | 0.003322 | 0.040973 | -0.80263 |
| 4 | YIL041W | 0.003322 | 0.006704 | -2.34954 | 0.833887 | 0.000649 | -3.70304 |
| 5 | YIL053W | 0.003322 | 0.01479  | -0.01565 | 0.003322 | 0.026207 | -1.13006 |
| 6 | YIR019C | 0.003322 | 0.029425 | 0.09598  | 0.003322 | 0.043842 | 0.122526 |
| 7 | YJL106W | 0.003322 | 0.021853 | -0.12852 | 0.003322 | 0.039657 | -0.79394 |
| 8 | YMR063W | 0.003322 | 0.01864  | -0.42182 | 0.003322 | 0.040709 | -0.34197 |

**PLATE 6**

|   | X3      | 5_QFD_p  | 5_QFD_st | 5_QFD_z-prime | 15_QFD_p | 15_QFD_st | 15_QFD_z-prime |
|---|---------|----------|----------|---------------|----------|-----------|----------------|
| 1 | EMPTY   | 0.162791 | 0.000212 | -2.69855      | 0.053156 | 0.000402  | -2.44034       |
| 2 | WT      | 0.003322 | 0.011234 | -1.1029       | 0.355482 | 0.006332  | -3.73281       |
| 3 | YGL253W | 0.003322 | 0.009331 | -0.59909      | 0.003322 | 0.019507  | -1.95498       |
| 4 | YHL027W | 0.003322 | 0.031165 | 0.096686      | 0.023256 | 0.028626  | -2.00942       |
| 5 | YJL179W | 0.003322 | 0.026009 | -3.20033      | 0.003322 | 0.047274  | -0.00756       |
| 6 | YKL037W | 0.003322 | 0.019625 | -0.03755      | 0.003322 | 0.075951  | -0.16453       |
| 7 | YNL197C | 0.003322 | 0.029224 | 0.166768      | 0.418605 | 0.001724  | -2.50478       |
| 8 | YNL322C | 0.003322 | 0.038851 | 0.28426       | 0.003322 | 0.02835   | -0.80699       |

| PLATE     | X3        | 5_Euclidean | 5_Euclidean | 5_Euclidean_z-prime | 15_Euclidean | 15_Euclidean | 15_Euclidean_z-prime | Criteria                          |
|-----------|-----------|-------------|-------------|---------------------|--------------|--------------|----------------------|-----------------------------------|
| PLATE 1   | 1 WT      | 0.003322    | 0.022664    | -0.15429            | 0.003322     | 0.030761     | -0.81864             | p-value: <0.1                     |
|           | 2 YAL035W | 0.003322    | 0.012053    | -0.65435            | 0.003322     | 0.011795     | -0.97575             | z-prime >0                        |
|           | 3 YBL008W | 0.003322    | 0.038028    | 0.070814            | 0.003322     | 0.080822     | 0.185281             | stat                              |
|           | 4 YGR285C | 0.003322    | 0.025016    | 0.037179            | 0.003322     | 0.02136      | -0.7178              |                                   |
|           | 5 YNL064C | 0.003322    | 0.003034    | -1.67397            | 0.003322     | 0.006805     | -0.80407             |                                   |
|           | 6 YOL018C | 0.003322    | 0.023943    | -0.47599            | 0.006645     | 0.030172     | -1.36339             | Strains that satisfy the criteria |
|           | 7 YOL086C | 0.0299      | 0.004883    | -1.71434            | 0.003322     | 0.02359      | -1.74075             |                                   |
|           | 8 YPL106C | 0.003322    | 0.017828    | -0.66305            | 0.003322     | 0.050712     | -0.29063             |                                   |
| PLATE 2   | X3        | 5_Euclidean | 5_Euclidean | 5_Euclidean_z-prime | 15_Euclidean | 15_Euclidean | 15_Euclidean_z-prime |                                   |
|           | 1 WT      | 0.003322    | 0.016549    | -0.00066            | 0.003322     | 0.021507     | -0.39968             |                                   |
|           | 2 YBR131W | 0.003322    | 0.018768    | -0.70234            | 0.006645     | 0.012603     | -1.55343             |                                   |
|           | 3 YIL170W | 0.003322    | 0.025147    | -0.17276            | 0.003322     | 0.026066     | -0.16029             |                                   |
|           | 4 YNL077W | 0.003322    | 0.014823    | -0.40903            | 0.003322     | 0.011378     | -0.97103             |                                   |
|           | 5 YNL098C | 0.003322    | 0.059416    | 0.334262            | 0.003322     | 0.023956     | -0.70612             |                                   |
|           | 6 YNL127W | 0.003322    | 0.019057    | -0.59037            | 0.003322     | 0.022572     | -0.30614             |                                   |
|           | 7 YPL036W | 0.003322    | 0.0193      | -0.32084            | 0.003322     | 0.032397     | -0.0582              |                                   |
| 8 YPL193W | 0.003322  | 0.003356    | -1.57986    | 0.003322            | 0.012087     | -0.71726     |                      |                                   |
| PLATE 3   | X3        | 5_Euclidean | 5_Euclidean | 5_Euclidean_z-prime | 15_Euclidean | 15_Euclidean | 15_Euclidean_z-prime |                                   |
|           | 1 WT      | 0.003322    | 0.013823    | -0.70009            | 0.003322     | 0.015155     | -0.69944             |                                   |
|           | 2 YCR028C | 0.006645    | 0.005457    | -2.36459            | 0.009967     | 0.009139     | -2.87568             |                                   |
|           | 3 YDR283C | 0.003322    | 0.017003    | -0.71163            | 0.003322     | 0.017435     | -0.80519             |                                   |
|           | 4 YGR053C | 0.003322    | 0.012279    | -0.58307            | 0.003322     | 0.009445     | -1.58927             |                                   |
|           | 5 YIL121W | 0.003322    | 0.014672    | -0.78177            | 0.003322     | 0.02259      | -0.78314             |                                   |
|           | 6 YLR452C | 0.003322    | 0.015993    | -0.38742            | 0.003322     | 0.01473      | -1.23826             |                                   |
|           | 7 YML071C | 0.003322    | 0.023911    | -0.01445            | 0.003322     | 0.025281     | -0.2316              |                                   |
| 8 YML116W | 0.003322  | 0.011422    | -1.31752    | 0.003322            | 0.019727     | -0.95014     |                      |                                   |
| PLATE 4   | X3        | 5_Euclidean | 5_Euclidean | 5_Euclidean_z-prime | 15_Euclidean | 15_Euclidean | 15_Euclidean_z-prime |                                   |
|           | 1 WT      | 0.003322    | 0.007955    | -1.18718            | 0.003322     | 0.015939     | -0.83216             |                                   |
|           | 2 YGL005C | 0.003322    | 0.01491     | 0.019629            | 0.003322     | 0.018165     | -2.08635             |                                   |
|           | 3 YGL025C | 0.003322    | 0.017777    | -1.10896            | 0.003322     | 0.026783     | -1.52149             |                                   |
|           | 4 YGR235C | 0.003322    | 0.014783    | -0.5923             | 0.003322     | 0.013968     | -1.16405             |                                   |
|           | 5 YGR236C | 0.003322    | 0.010285    | -0.79654            | 0.003322     | 0.015985     | -1.17515             |                                   |
|           | 6 YJR073C | 0.003322    | 0.022464    | 0.076522            | 0.003322     | 0.021103     | -0.47817             |                                   |
|           | 7 YML123C | 0.003322    | 0.008042    | -0.57299            | 0.006645     | 0.008764     | -2.00967             |                                   |
| 8 YMR095C | 0.003322  | 0.022906    | 0.040503    | 0.003322            | 0.021088     | -0.41289     |                      |                                   |
| PLATE 5   | X3        | 5_Euclidean | 5_Euclidean | 5_Euclidean_z-prime | 15_Euclidean | 15_Euclidean | 15_Euclidean_z-prime |                                   |

|                |         |            |            |                     |            |            |                      |
|----------------|---------|------------|------------|---------------------|------------|------------|----------------------|
| 1              | WT      | 0.003322   | 0.005878   | -0.7249             | 0.003322   | 0.007192   | -1.46352             |
| 2              | YFR035C | 0.003322   | 0.004123   | -1.50256            | 0.003322   | 0.015956   | -0.73246             |
| 3              | YGR243W | 0.003322   | 0.012047   | 0.088519            | 0.003322   | 0.012478   | -0.84209             |
| 4              | YIL041W | 0.003322   | 0.005569   | -0.66192            | 0.023256   | 0.002126   | -1.97041             |
| 5              | YIL053W | 0.003322   | 0.006248   | -0.4409             | 0.003322   | 0.008405   | -1.11026             |
| 6              | YIR019C | 0.003322   | 0.01667    | 0.367963            | 0.003322   | 0.015608   | -0.03574             |
| 7              | YJL106W | 0.003322   | 0.007345   | -0.49921            | 0.003322   | 0.01217    | -0.73195             |
| 8              | YMR063W | 0.003322   | 0.00743    | -0.6241             | 0.003322   | 0.014433   | -0.70916             |
| <b>PLATE 6</b> | X3      | 5_Euclidea | 5_Euclidea | 5_Euclidean_z-prime | 15_Euclide | 15_Euclide | 15_Euclidean_z-prime |
| 1              | EMPTY   | 0.049834   | 0.000154   | -2.45458            | 0.036545   | 0.000122   | -1.40683             |
| 2              | WT      | 0.003322   | 0.008664   | -0.47497            | 0.016611   | 0.004054   | -2.92584             |
| 3              | YGL253W | 0.003322   | 0.008852   | -0.17988            | 0.003322   | 0.006151   | -1.63176             |
| 4              | YHL027W | 0.003322   | 0.00799    | -0.38741            | 0.013289   | 0.009126   | -1.89173             |
| 5              | YJL179W | 0.003322   | 0.015506   | -2.19977            | 0.003322   | 0.016129   | 0.00986              |
| 6              | YKL037W | 0.003322   | 0.007446   | 0.042404            | 0.003322   | 0.024887   | -0.21382             |
| 7              | YNL197C | 0.003322   | 0.012072   | -0.00738            | 0.069767   | 0.001523   | -2.03266             |
| 8              | YNL322C | 0.003322   | 0.01615    | 0.273182            | 0.003322   | 0.018201   | -0.08585             |



| PLATE   | X3        | 5_KS_p-val | 5_KS_stat | 5_KS_z-prime | 15_KS_p-v | 15_KS_stat | 15_KS_z-prime |
|---------|-----------|------------|-----------|--------------|-----------|------------|---------------|
| PLATE 1 | 1 WT      | 0.003322   | 0.058615  | -0.286       | 0.003322  | 0.077433   | -0.92687      |
|         | 2 YAL035W | 0.003322   | 0.029506  | -0.63641     | 0.003322  | 0.019683   | -1.12183      |
|         | 3 YBL008W | 0.003322   | 0.082689  | -0.25134     | 0.003322  | 0.29327    | 0.461845      |
|         | 4 YGR285C | 0.003322   | 0.094796  | 0.237204     | 0.003322  | 0.052917   | -0.85291      |
|         | 5 YNL064C | 0.169435   | 0.00308   | -2.60894     | 0.003322  | 0.009655   | -1.60907      |
|         | 6 YOL018C | 0.003322   | 0.055485  | -1.03457     | 0.006645  | 0.096099   | -1.44583      |
|         | 7 YOL086C | 0.023256   | 0.01892   | -2.08928     | 0.003322  | 0.058979   | -3.03157      |
|         | 8 YPL106C | 0.003322   | 0.047707  | -0.74969     | 0.003322  | 0.152789   | 0.108816      |
| PLATE 2 | 1 WT      | 0.003322   | 0.042893  | -0.14032     | 0.003322  | 0.040156   | -1.02485      |
|         | 2 YBR131W | 0.003322   | 0.047845  | -1.18348     | 0.425249  | 0.037614   | -1.75263      |
|         | 3 YIL170W | 0.003322   | 0.060528  | -0.41449     | 0.003322  | 0.056779   | -0.3927       |
|         | 4 YNL077W | 0.003322   | 0.041695  | -0.54123     | 0.003322  | 0.023052   | -1.31954      |
|         | 5 YNL098C | 0.003322   | 0.143749  | 0.298599     | 0.003322  | 0.069036   | -0.75041      |
|         | 6 YNL127W | 0.003322   | 0.043857  | -0.90137     | 0.003322  | 0.040308   | -0.65927      |
|         | 7 YPL036W | 0.003322   | 0.067038  | -0.32637     | 0.003322  | 0.065581   | -0.57355      |
|         | 8 YPL193W | 0.009967   | 0.004005  | -2.00815     | 0.003322  | 0.023203   | -1.37358      |
| PLATE 3 | 1 WT      | 0.003322   | 0.034662  | -0.65498     | 0.003322  | 0.035733   | -0.99228      |
|         | 2 YCR028C | 0.026578   | 0.012837  | -2.99674     | 0.009967  | 0.030647   | -3.23638      |
|         | 3 YDR283C | 0.003322   | 0.040941  | -0.11555     | 0.003322  | 0.035822   | -1.15757      |
|         | 4 YGR053C | 0.003322   | 0.034493  | -0.21066     | 0.003322  | 0.024102   | -1.43615      |
|         | 5 YIL121W | 0.003322   | 0.029677  | -1.24636     | 0.003322  | 0.042476   | -0.45761      |
|         | 6 YLR452C | 0.003322   | 0.04268   | -0.24075     | 0.003322  | 0.028374   | -1.78765      |
|         | 7 YML071C | 0.003322   | 0.07514   | 0.223042     | 0.003322  | 0.059717   | 0.032034      |
|         | 8 YML116W | 0.003322   | 0.0304    | -0.65441     | 0.003322  | 0.049199   | -0.77151      |
| PLATE 4 | 1 WT      | 0.003322   | 0.017438  | -1.11332     | 0.003322  | 0.027341   | -0.62379      |
|         | 2 YGL005C | 0.003322   | 0.050737  | 0.240543     | 0.003322  | 0.042508   | -1.86488      |
|         | 3 YGL025C | 0.003322   | 0.049026  | -1.14556     | 0.003322  | 0.038074   | -2.30271      |
|         | 4 YGR235C | 0.003322   | 0.043472  | -0.01938     | 0.003322  | 0.026761   | -1.02469      |
|         | 5 YGR236C | 0.003322   | 0.018875  | -0.62045     | 0.003322  | 0.020107   | -1.00879      |
|         | 6 YJR073C | 0.003322   | 0.062995  | 0.002144     | 0.003322  | 0.031973   | -1.35756      |
|         | 7 YML123C | 0.003322   | 0.025154  | -0.30217     | 0.003322  | 0.015583   | -1.52782      |
|         | 8 YMR095C | 0.003322   | 0.074058  | 0.112045     | 0.003322  | 0.035025   | -0.87986      |
| PLATE 5 | X3        | 5_KS_p-val | 5_KS_stat | 5_KS_z-prime | 15_KS_p-v | 15_KS_stat | 15_KS_z-prime |

## Criteria

p-value: &lt;0.1

z-prime &gt;0

stat

 Strains that satisfy the criteria

|   |         |          |          |          |          |          |          |
|---|---------|----------|----------|----------|----------|----------|----------|
| 1 | WT      | 0.003322 | 0.01241  | -1.53779 | 0.006645 | 0.016979 | -2.28976 |
| 2 | YFR035C | 0.003322 | 0.016116 | -1.81993 | 0.003322 | 0.057131 | -0.73132 |
| 3 | YGR243W | 0.003322 | 0.020908 | -0.42061 | 0.003322 | 0.046013 | -0.76704 |
| 4 | YIL041W | 0.003322 | 0.010718 | -1.66385 | 0.215947 | 0.003753 | -3.07603 |
| 5 | YIL053W | 0.003322 | 0.017251 | -0.07464 | 0.003322 | 0.033975 | -0.97679 |
| 6 | YIR019C | 0.003322 | 0.038358 | 0.151616 | 0.003322 | 0.057981 | 0.12969  |
| 7 | YJL106W | 0.003322 | 0.029338 | -0.14216 | 0.003322 | 0.048207 | -0.71054 |
| 8 | YMR063W | 0.003322 | 0.02351  | -0.38004 | 0.003322 | 0.053029 | -0.23737 |

## PLATE 6

|   | X3      | 5_KS_p-val | 5_KS_stat | 5_KS_z-prime | 15_KS_p-v | 15_KS_stat | 15_KS_z-prime |
|---|---------|------------|-----------|--------------|-----------|------------|---------------|
| 1 | EMPTY   | 0.099668   | 0.000341  | -2.64816     | 0.122924  | 0.00026    | -2.00315      |
| 2 | WT      | 0.003322   | 0.016222  | -0.94526     | 0.129568  | 0.010094   | -3.33488      |
| 3 | YGL253W | 0.003322   | 0.013847  | -0.60504     | 0.003322  | 0.02322    | -1.84211      |
| 4 | YHL027W | 0.003322   | 0.033126  | -0.01679     | 0.016611  | 0.033976   | -1.92587      |
| 5 | YJL179W | 0.003322   | 0.035442  | -3.11231     | 0.003322  | 0.059246   | 0.07609       |
| 6 | YKL037W | 0.003322   | 0.025621  | 0.086941     | 0.003322  | 0.090448   | -0.12722      |
| 7 | YNL197C | 0.003322   | 0.037489  | 0.128847     | 0.272425  | 0.002564   | -2.29587      |
| 8 | YNL322C | 0.003322   | 0.051229  | 0.301774     | 0.003322  | 0.032958   | -0.78025      |

| PLATE   | X3        | 5_SAM_p  | 5_SAM_st | 5_SAM_z-prime | 15_SAM_p | 15_SAM_s | 15_SAM_z-prime |
|---------|-----------|----------|----------|---------------|----------|----------|----------------|
| PLATE 1 | 1 WT      | 0.003322 | 0.023942 | 0.373815      | 0.003322 | 0.047169 | -0.56955       |
|         | 2 YAL035W | 0.003322 | 0.009198 | -0.29388      | 0.003322 | 0.01416  | -0.851         |
|         | 3 YBL008W | 0.003322 | 0.056917 | 0.547793      | 0.003322 | 0.222894 | 0.658763       |
|         | 4 YGR285C | 0.003322 | 0.026959 | 0.506116      | 0.003322 | 0.026373 | -0.83294       |
|         | 5 YNL064C | 0.003322 | 0.002328 | -2.13904      | 0.003322 | 0.004392 | -0.48706       |
|         | 6 YOL018C | 0.003322 | 0.03276  | -0.02226      | 0.006645 | 0.079711 | -1.48869       |
|         | 7 YOL086C | 0.112957 | 0.00493  | -2.84305      | 0.003322 | 0.040667 | -2.47341       |
|         | 8 YPL106C | 0.003322 | 0.02142  | -0.29333      | 0.003322 | 0.115472 | 0.145677       |
| PLATE 2 | 1 WT      | 0.003322 | 0.012406 | 0.524115      | 0.003322 | 0.021334 | 0.136736       |
|         | 2 YBR131W | 0.003322 | 0.020459 | -0.45765      | 0.096346 | 0.02436  | -2.43579       |
|         | 3 YIL170W | 0.003322 | 0.026049 | 0.373947      | 0.003322 | 0.027687 | 0.350501       |
|         | 4 YNL077W | 0.003322 | 0.010394 | 0.081634      | 0.003322 | 0.010726 | -0.77848       |
|         | 5 YNL098C | 0.003322 | 0.112648 | 0.705093      | 0.003322 | 0.058274 | -0.3312        |
|         | 6 YNL127W | 0.003322 | 0.015679 | -0.47118      | 0.003322 | 0.022863 | 0.165515       |
|         | 7 YPL036W | 0.003322 | 0.017496 | 0.165724      | 0.003322 | 0.037262 | 0.452075       |
|         | 8 YPL193W | 0.003322 | 0.001346 | -2.64664      | 0.003322 | 0.008959 | -0.34032       |
| PLATE 3 | 1 WT      | 0.003322 | 0.01349  | -0.40449      | 0.003322 | 0.016182 | -0.34843       |
|         | 2 YCR028C | 0.009967 | 0.003437 | -3.68661      | 0.0299   | 0.01017  | -4.61804       |
|         | 3 YDR283C | 0.003322 | 0.017613 | -0.44826      | 0.003322 | 0.021753 | -0.5872        |
|         | 4 YGR053C | 0.003322 | 0.008423 | -0.20356      | 0.003322 | 0.011643 | -2.11152       |
|         | 5 YIL121W | 0.003322 | 0.015009 | -0.56396      | 0.003322 | 0.031237 | -0.75056       |
|         | 6 YLR452C | 0.003322 | 0.015205 | 0.02731       | 0.003322 | 0.017943 | -1.32978       |
|         | 7 YML071C | 0.003322 | 0.020893 | 0.480626      | 0.003322 | 0.028489 | 0.222298       |
|         | 8 YML116W | 0.003322 | 0.011294 | -1.53657      | 0.003322 | 0.029417 | -0.71952       |
| PLATE 4 | 1 WT      | 0.003322 | 0.006394 | -1.38893      | 0.003322 | 0.019016 | -0.59566       |
|         | 2 YGL005C | 0.003322 | 0.008879 | 0.524996      | 0.003322 | 0.020974 | -3.61228       |
|         | 3 YGL025C | 0.003322 | 0.013875 | -1.84914      | 0.003322 | 0.034708 | -2.40337       |
|         | 4 YGR235C | 0.003322 | 0.012417 | -0.2301       | 0.003322 | 0.014135 | -1.41834       |
|         | 5 YGR236C | 0.003322 | 0.007261 | -0.55299      | 0.003322 | 0.017018 | -1.22775       |
|         | 6 YJR073C | 0.003322 | 0.019191 | 0.577767      | 0.003322 | 0.023359 | -0.1           |
|         | 7 YML123C | 0.003322 | 0.004155 | -0.19143      | 0.006645 | 0.008049 | -3.25147       |
|         | 8 YMR095C | 0.003322 | 0.023044 | 0.494259      | 0.003322 | 0.027328 | 0.041577       |
| PLATE 5 | X3        | 5_SAM_p  | 5_SAM_st | 5_SAM_z-prime | 15_SAM_p | 15_SAM_s | 15_SAM_z-prime |

**Criteria**

p-value: <0.1  
z-prime >0  
stat

 Strains that satisfy the criteria

|                |         |          |           |               |          |          |                |
|----------------|---------|----------|-----------|---------------|----------|----------|----------------|
| 1              | WT      | 0.003322 | 0.003093  | -0.3709       | 0.003322 | 0.005447 | -1.90898       |
| 2              | YFR035C | 0.003322 | 0.002072  | -1.87072      | 0.003322 | 0.017912 | -0.62927       |
| 3              | YGR243W | 0.003322 | 0.006541  | 0.554279      | 0.003322 | 0.011114 | -0.72805       |
| 4              | YIL041W | 0.003322 | 0.002286  | -0.32088      | 0.023256 | 0.00151  | -2.80909       |
| 5              | YIL053W | 0.003322 | 0.002088  | -0.00381      | 0.003322 | 0.006479 | -1.15775       |
| 6              | YIR019C | 0.003322 | 0.009648  | 0.812944      | 0.003322 | 0.010794 | 0.457845       |
| 7              | YJL106W | 0.003322 | 0.003168  | -0.12775      | 0.003322 | 0.009989 | -0.74          |
| 8              | YMR063W | 0.003322 | 0.003223  | -0.30856      | 0.003322 | 0.012247 | -0.54916       |
| <b>PLATE 6</b> | X3      | 5_SAM_p- | 5_SAM_stz | 5_SAM_z-prime | 15_SAM_p | 15_SAM_s | 15_SAM_z-prime |
| 1              | EMPTY   | 0.059801 | 1.29E-05  | -4.1457       | 0.086379 | 8.34E-06 | -1.80152       |
| 2              | WT      | 0.003322 | 0.003181  | -0.07609      | 0.016611 | 0.00456  | -5.35101       |
| 3              | YGL253W | 0.003322 | 0.003808  | 0.306744      | 0.003322 | 0.004204 | -2.14105       |
| 4              | YHL027W | 0.003322 | 0.003506  | -0.00108      | 0.019934 | 0.011222 | -2.53201       |
| 5              | YJL179W | 0.003322 | 0.009609  | -4.68983      | 0.003322 | 0.010746 | 0.516765       |
| 6              | YKL037W | 0.003322 | 0.002227  | 0.569067      | 0.003322 | 0.027794 | 0.231761       |
| 7              | YNL197C | 0.003322 | 0.006402  | 0.456397      | 0.112957 | 0.0009   | -3.00438       |
| 8              | YNL322C | 0.003322 | 0.009345  | 0.69091       | 0.003322 | 0.013199 | 0.469316       |

|               | X3      | 5_QFD_p-v | 5_QFD_sta | 5_QFD_z-prime | X3      | 5_Euclidean | 5_Euclidean | 5_Euclidean_z-prime | X3      | 5_KS_p-v | 5_KS_stat | 5_KS_z-pri |
|---------------|---------|-----------|-----------|---------------|---------|-------------|-------------|---------------------|---------|----------|-----------|------------|
| <b>PLATE1</b> | YGR285C | 0.003322  | 0.093059  | 0.244339      | YBL008W | 0.003322    | 0.038028    | 0.070814            | YGR285C | 0.003322 | 0.094796  | 0.237204   |
|               | YGR285C | 0.003322  | 0.025016  | 0.037179      |         |             |             |                     |         |          |           |            |
| <b>PLATE2</b> | YNL098C | 0.003322  | 0.115081  | 0.21789       | YNL098C | 0.003322    | 0.059416    | 0.334262            | YNL098C | 0.003322 | 0.143749  | 0.298599   |
| <b>PLATE3</b> | YML071C | 0.003322  | 0.05823   | 0.297425      |         |             |             |                     | YML071C | 0.003322 | 0.07514   | 0.223042   |
| <b>PLATE4</b> | YGL005C | 0.003322  | 0.039636  | 0.326441      | YGL005C | 0.003322    | 0.01491     | 0.019629            | YGL005C | 0.003322 | 0.050737  | 0.240543   |
|               | YGR235C | 0.003322  | 0.03403   | 0.001086      | YJR073C | 0.003322    | 0.022464    | 0.076522            | YJR073C | 0.003322 | 0.062995  | 0.002144   |
|               | YJR073C | 0.003322  | 0.045185  | 0.048446      | YMR095C | 0.003322    | 0.022906    | 0.040503            | YMR095C | 0.003322 | 0.074058  | 0.112045   |
|               | YMR095C | 0.003322  | 0.057871  | 0.160342      |         |             |             |                     |         |          |           |            |
| <b>PLATE5</b> | YIR019C | 0.003322  | 0.029425  | 0.09598       | YGR243W | 0.003322    | 0.012047    | 0.088519            | YIR019C | 0.003322 | 0.038358  | 0.151616   |
|               |         |           |           |               | YIR019C | 0.003322    | 0.01667     | 0.367963            |         |          |           |            |
| <b>PLATE6</b> | YHL027W | 0.003322  | 0.031165  | 0.096686      | YKL037W | 0.003322    | 0.007446    | 0.042404            | YKL037W | 0.003322 | 0.025621  | 0.086941   |
|               | YNL197C | 0.003322  | 0.029224  | 0.166768      | YNL322C | 0.003322    | 0.01615     | 0.273182            | YNL197C | 0.003322 | 0.037489  | 0.128847   |
|               | YNL322C | 0.003322  | 0.038851  | 0.28426       |         |             |             |                     | YNL322C | 0.003322 | 0.051229  | 0.301774   |

| me | X3      | 5_SAM_p- | 5_SAM_st | 5_SAM_z-prime |
|----|---------|----------|----------|---------------|
|    | WT      | 0.003322 | 0.023942 | 0.373815      |
|    | YBL008W | 0.003322 | 0.056917 | 0.547793      |
|    | YGR285C | 0.003322 | 0.026959 | 0.506116      |
|    |         |          |          |               |
|    | WT      | 0.003322 | 0.012406 | 0.524115      |
|    | YIL170W | 0.003322 | 0.026049 | 0.373947      |
|    | YNL077W | 0.003322 | 0.010394 | 0.081634      |
|    | YNL098C | 0.003322 | 0.112648 | 0.705093      |
|    | YPL036W | 0.003322 | 0.017496 | 0.165724      |
|    |         |          |          |               |
|    | YLR452C | 0.003322 | 0.015205 | 0.02731       |
|    | YML071C | 0.003322 | 0.020893 | 0.480626      |
|    |         |          |          |               |
|    | YGL005C | 0.003322 | 0.008879 | 0.524996      |
|    | YJR073C | 0.003322 | 0.019191 | 0.577767      |
|    | YMR095C | 0.003322 | 0.023044 | 0.494259      |
|    |         |          |          |               |
|    | YGR243W | 0.003322 | 0.006541 | 0.554279      |
|    | YIR019C | 0.003322 | 0.009648 | 0.812944      |
|    |         |          |          |               |
|    | YGL253W | 0.003322 | 0.003808 | 0.306744      |
|    | YKL037W | 0.003322 | 0.002227 | 0.569067      |
|    | YNL197C | 0.003322 | 0.006402 | 0.456397      |
|    | YNL322C | 0.003322 | 0.009345 | 0.69091       |

|               | X3      | 15_QFD_p | 15_QFD_s | 15_QFD_z-prime | X3      | 15_Euclide | 15_Euclide | 15_Euclidean_z-prime | X3      | 15_KS_p-v | 15_KS_sta | 15_KS_z-prime |
|---------------|---------|----------|----------|----------------|---------|------------|------------|----------------------|---------|-----------|-----------|---------------|
| <b>PLATE1</b> | YBL008W | 0.003322 | 0.301201 | 0.476806       | YBL008W | 0.003322   | 0.080822   | 0.185281             | YBL008W | 0.003322  | 0.29327   | 0.461845      |
|               | YPL106C | 0.003322 | 0.165286 | 0.323921       |         |            |            |                      | YPL106C | 0.003322  | 0.152789  | 0.108816      |
| <b>PLATE2</b> |         |          |          |                |         |            |            |                      | YML071C | 0.003322  | 0.059717  | 0.032034      |
| <b>PLATE3</b> |         |          |          |                |         |            |            |                      |         |           |           |               |
| <b>PLATE4</b> |         |          |          |                |         |            |            |                      |         |           |           |               |
| <b>PLATE5</b> | YIR019C | 0.003322 | 0.043842 | 0.122526       |         |            |            |                      | YIR019C | 0.003322  | 0.057981  | 0.12969       |
| <b>PLATE6</b> |         |          |          |                | YJL179W | 0.003322   | 0.016129   | 0.00986              | YJL179W | 0.003322  | 0.059246  | 0.07609       |

| Time | X3      | 15_SAM_p | 15_SAM_s | 15_SAM_z-prime |
|------|---------|----------|----------|----------------|
|      | YBL008W | 0.003322 | 0.222894 | 0.658763       |
|      | YPL106C | 0.003322 | 0.115472 | 0.145677       |
|      |         |          |          |                |
|      | WT      | 0.003322 | 0.021334 | 0.136736       |
|      | YIL170W | 0.003322 | 0.027687 | 0.350501       |
|      | YNL127W | 0.003322 | 0.022863 | 0.165515       |
|      | YPL036W | 0.003322 | 0.037262 | 0.452075       |
|      |         |          |          |                |
|      | YML071C | 0.003322 | 0.028489 | 0.222298       |
|      |         |          |          |                |
|      | YMR095C | 0.003322 | 0.027328 | 0.041577       |
|      |         |          |          |                |
|      | YIR019C | 0.003322 | 0.010794 | 0.457845       |
|      |         |          |          |                |
|      | YJL179W | 0.003322 | 0.010746 | 0.516765       |
|      | YKL037W | 0.003322 | 0.027794 | 0.231761       |
|      | YNL322C | 0.003322 | 0.013199 | 0.469316       |



**Final Hit Strain List 5uM**

|               |         |         |         |
|---------------|---------|---------|---------|
| <b>PLATE1</b> | YGR285C |         |         |
| <b>PLATE2</b> | YNL098C |         |         |
| <b>PLATE3</b> | YML071C |         |         |
| <b>PLATE4</b> | YGL005C | YJR073C | YMR095C |
| <b>PLATE5</b> | YIR019C |         |         |
| <b>PLATE6</b> | YNL197C | YNL322C | YKL037W |

**Final Hit Strain List 15uM**

|         |         |
|---------|---------|
| YBL008W | YPL106C |
| YIR019C |         |
| YJL179W |         |

**Criteria**

Must be a hit in 3 or more of the dist measurements ca

lc
