# Supplementary material
Source: PubMed Central journal article supplement (PMC6521697)
Supplement: NIHMS1013385-supplement-Table_S3.pdf [file NIHMS1013385-supplement-Table_S3.pdf]

| Compound          | Fun12    | Kre1     | Opi3     | WT       | X.Fun12  | X.Kre1   | X.Opi3   | X.WT     | Div.index | Sum.index |
|-------------------|----------|----------|----------|----------|----------|----------|----------|----------|-----------|-----------|
| 690634-100μM      | 1.389029 | 1.673929 | 1.277958 | 4.099115 | 114.9353 | 145.1577 | 148.2363 | 134.3037 | 33.30099  | 542.633   |
| 690634-100μM      | 0.497485 | 5.1876   | 0.899309 | 4.052528 | 117.596  | 125.7143 | 130.8224 | 129.0543 | 13.22637  | 503.187   |
| 690634-20μM       | 0.47572  | 5.394713 | 0.852392 | 3.95785  | 112.4512 | 130.7334 | 123.9973 | 126.0392 | 18.28222  | 493.2211  |
| 690634-20μM       | 1.209208 | 1.418175 | 1.073144 | 3.860525 | 100.0561 | 122.9795 | 124.479  | 126.4865 | 26.43041  | 474.0011  |
| Rad-5μM           | 2.089786 | 0.26048  | 0.790863 | 0.591964 | 172.9196 | 22.58801 | 91.73588 | 19.39516 | 153.5244  | 306.6386  |
| 145366-100μM      | 0.917048 | 0.154104 | 1.428948 | 1.43701  | 75.88122 | 13.36343 | 165.7504 | 47.08229 | 152.387   | 302.0773  |
| Macbecin-20μM     | 1.949644 | 0.248128 | 0.800461 | 0.590369 | 161.3235 | 21.51685 | 92.84925 | 19.34288 | 141.9806  | 295.0325  |
| 145366-100μM      | 0.309566 | 0.871194 | 1.132011 | 0.919552 | 73.17543 | 21.11218 | 164.6735 | 29.28349 | 143.5613  | 288.2446  |
| Ga-5μM            | 2.008641 | 0.173123 | 0.753589 | 0.229408 | 166.2052 | 15.01267 | 87.41229 | 7.516326 | 158.6889  | 276.1465  |
| 210236-100μM      | 1.753255 | 0.183717 | 0.740354 | 0.467921 | 145.0733 | 15.93136 | 85.87718 | 15.33099 | 129.7423  | 262.2128  |
| 210236-20μM       | 1.722948 | 0.247649 | 0.706377 | 0.318343 | 142.5656 | 21.47536 | 81.93596 | 10.43021 | 132.1353  | 256.4071  |
| Rad-15μM          | 1.57076  | 0.189629 | 0.762288 | 0.640571 | 129.9727 | 16.44402 | 88.42135 | 20.9877  | 113.5287  | 255.8257  |
| 42199-100μM       | 1.573565 | 0.20064  | 0.67542  | 0.440955 | 130.2048 | 17.39887 | 78.34513 | 14.44747 | 115.7574  | 240.3963  |
| Macbecin-100μM    | 1.307463 | 0.280507 | 0.731743 | 0.694427 | 108.1862 | 24.32466 | 84.87836 | 22.75225 | 85.43391  | 240.1414  |
| Ga-15μM           | 1.607787 | 0.114756 | 0.737944 | 0.31911  | 133.0365 | 9.951292 | 85.59755 | 10.45532 | 123.0852  | 239.0407  |
| 103353-100μM      | 0.533542 | 0.840049 | 0.420638 | 0.581742 | 126.1193 | 20.35743 | 61.19019 | 18.52579 | 107.5935  | 226.1927  |
| Rad-5μM           | 0.463778 | 0.684281 | 0.486912 | 0.588859 | 109.6283 | 16.58261 | 70.83107 | 18.75243 | 93.04566  | 215.7944  |
| 145366-20μM       | 1.563399 | 0.216269 | 0.468334 | 0.217462 | 129.3636 | 18.75418 | 54.32421 | 7.124945 | 122.2386  | 209.5669  |
| Benztropine-100μM | 0.485001 | 0.633642 | 0.430462 | 0.517716 | 114.645  | 15.35545 | 62.61929 | 16.48686 | 99.28952  | 209.1066  |
| Benztropine-100μM | 1.453584 | 0.145633 | 0.589279 | 0.155886 | 120.277  | 12.62878 | 68.35326 | 5.10746  | 115.1695  | 206.3665  |
| Macbecin-20μM     | 0.413117 | 0.516654 | 0.46521  | 0.619127 | 97.6531  | 12.5204  | 67.67397 | 19.71634 | 85.1327   | 197.5638  |
| 103353-20μM       | 1.350336 | 0.147973 | 0.539955 | 0.291404 | 111.7337 | 12.8317  | 62.63194 | 9.547594 | 102.1861  | 196.7449  |
| Rad-15μM          | 0.32239  | 0.571103 | 0.488268 | 0.680867 | 76.2069  | 13.83989 | 71.0283  | 21.68247 | 62.36701  | 182.7576  |
| Ga-5μM            | 0.424137 | 0.424333 | 0.411583 | 0.334804 | 100.258  | 10.28312 | 59.87287 | 10.66197 | 89.97484  | 181.0759  |
| Macbecin-100μM    | 0.283624 | 0.776808 | 0.47358  | 0.789269 | 67.04343 | 18.82486 | 68.89156 | 25.13457 | 50.0667   | 179.8944  |
| 210236-100μM      | 0.365436 | 0.303187 | 0.42883  | 0.64307  | 86.38218 | 7.347308 | 62.38189 | 20.47881 | 79.03487  | 176.5902  |
| 103353-100μM      | 1.005665 | 0.133305 | 0.60066  | 0.334588 | 83.21386 | 11.5598  | 69.67339 | 10.96246 | 72.2514   | 175.4095  |
| 17AAG-5μM         | 1.070745 | 0.176952 | 0.483166 | 0.276143 | 88.59894 | 15.34474 | 56.04466 | 9.047554 | 79.55139  | 169.0359  |
| Ga-15μM           | 0.301369 | 0.184939 | 0.453698 | 0.682633 | 71.23798 | 4.481736 | 65.99931 | 21.73869 | 66.75624  | 163.4577  |
| 17AAG-15μM        | 1.048047 | 0.170796 | 0.370698 | 0.364064 | 86.72076 | 14.81086 | 42.99906 | 11.9282  | 74.79256  | 156.4589  |
| 42199-20μM        | 0.618934 | 0.122245 | 0.516603 | 1.030056 | 51.21374 | 10.60072 | 59.9232  | 33.74883 | 49.32249  | 155.4865  |
| 210236-20μM       | 0.320106 | 0.305636 | 0.386321 | 0.509075 | 75.66691 | 7.406676 | 56.19808 | 16.21168 | 68.26023  | 155.4834  |
| 42199-100μM       | 0.299801 | 0.495267 | 0.416467 | 0.238919 | 70.86725 | 12.0021  | 60.58341 | 7.608459 | 63.25879  | 151.0612  |
| 145366-20μM       | 0.374065 | 0.614855 | 0.245782 | 0.285787 | 88.4218  | 14.90016 | 35.75391 | 9.100984 | 79.32081  | 148.1769  |
| 103353-20μM       | 0.266054 | 0.430389 | 0.365053 | 0.51339  | 62.89019 | 10.42989 | 53.10417 | 16.3491  | 52.4603   | 142.7734  |
| 42199-20μM        | 0.213041 | 0.228327 | 0.400226 | 0.606326 | 50.3589  | 5.533179 | 58.22074 | 19.30867 | 52.68756  | 133.4215  |

|                  |          |          |          |          |          |          |          |          |          |          |
|------------------|----------|----------|----------|----------|----------|----------|----------|----------|----------|----------|
| 1% DMSO          | 0.18273  | 0.334809 | 0.276267 | 0.325925 | 43.19386 | 8.113637 | 40.18847 | 10.3792  | 35.08022 | 101.8752 |
| 17AAG-15µM       | 0.110654 | 0.520299 | 0.150131 | 0.805985 | 26.15661 | 12.60872 | 21.83947 | 25.6669  | 13.54789 | 86.2717  |
| Benztropine-20µM | 0.488456 | 0.12012  | 0.124042 | 0.612617 | 40.41738 | 10.41638 | 14.38821 | 20.07181 | 30.00099 | 85.29378 |
| Benztropine-20µM | 0.154902 | 0.501403 | 0.095841 | 0.649294 | 36.61578 | 12.15082 | 13.94194 | 20.67701 | 24.46497 | 83.38555 |
| 17AAG-5µM        | 0.101064 | 0.346634 | 0.266434 | 0.244016 | 23.88951 | 8.400203 | 38.75805 | 7.77078  | 30.98727 | 78.81854 |
| 1% DMSO          | 0.257008 | 0.136607 | 0.276809 | 0.338851 | 21.26614 | 11.84611 | 32.10833 | 11.10215 | 21.00618 | 76.32272 |

| Compound          | Ras2     | Sno1     | WT       | Zuo1     | %Ras2    | %Sno1    | %Zuo1    | %WT      | Div.index | Sum.index |
|-------------------|----------|----------|----------|----------|----------|----------|----------|----------|-----------|-----------|
| 1% DMSO           | 0.230322 | 0.224366 | 0.267186 | 0.145493 | 9.629314 | 2.964038 | 2.84473  | 5.75944  | 6.784584  | 21.19752  |
| 103353-100µM      | 0.167442 | 0.771099 | 0.435657 | 0.204177 | 7.000419 | 10.18679 | 4.638435 | 8.082505 | 5.548358  | 29.90815  |
| 103353-20µM       | 0.246414 | 0.392672 | 0.471657 | 0.241367 | 10.30209 | 5.187491 | 5.021719 | 9.554679 | 5.280369  | 30.06598  |
| 145366-100µM      | 1.815543 | 3.951753 | 1.633012 | 4.934301 | 75.90426 | 52.20564 | 17.38665 | 195.3277 | 177.9411  | 340.8242  |
| 145366-20µM       | 0.095763 | 0.256495 | 0.578912 | 0.187668 | 4.003674 | 3.388489 | 6.163663 | 7.428964 | 4.040475  | 20.98479  |
| 17AAG-15µM        | 0.194855 | 0.302823 | 0.514167 | 0.121092 | 8.146489 | 4.000522 | 5.474326 | 4.79351  | 4.145966  | 22.41485  |
| 17AAG-5µM         | 0.183367 | 0.495111 | 0.829724 | 0.086759 | 7.666214 | 6.540793 | 8.834059 | 3.434434 | 5.399625  | 26.4755   |
| 210236-100µM      | 0.223733 | 0.299224 | 2.483483 | 0.24867  | 9.353817 | 3.952976 | 26.4416  | 9.843754 | 22.48863  | 49.59215  |
| 210236-20µM       | 0.265489 | 0.444071 | 0.31362  | 0.190924 | 11.09957 | 5.866506 | 3.339103 | 7.557861 | 7.760469  | 27.86304  |
| 42199-100µM       | 0.269786 | 1.537527 | 1.048538 | 0.191133 | 11.27921 | 20.3119  | 11.16377 | 7.566147 | 12.74575  | 50.32102  |
| 42199-20µM        | 0.39385  | 1.98258  | 1.846354 | 0.117101 | 16.46611 | 26.19137 | 19.6581  | 4.635538 | 21.55583  | 66.95112  |
| 690634-100µM      | 3.251837 | 10.33656 | 11.87112 | 3.290059 | 135.9529 | 136.5538 | 126.3916 | 130.2393 | 10.16215  | 529.1375  |
| 690634-20µM       | 2.385388 | 7.558656 | 9.273776 | 2.505316 | 99.72833 | 99.85554 | 98.73773 | 99.17465 | 1.117811  | 397.4963  |
| Benztropine-100µM | 0.266753 | 0.632237 | 0.345706 | 0.287371 | 11.15242 | 8.352329 | 3.680727 | 11.37578 | 7.695049  | 34.56125  |
| Benztropine-20µM  | 0.129088 | 0.766514 | 0.502114 | 0.09004  | 5.396899 | 10.12623 | 5.345999 | 3.564303 | 6.561923  | 24.43343  |
| Ga-15µM           | 0.427816 | 0.577101 | 1.235829 | 0.177057 | 17.88614 | 7.623941 | 13.15785 | 7.008928 | 10.87721  | 45.67686  |
| Ga-5µM            | 0.375263 | 0.557395 | 0.402778 | 0.208    | 15.68899 | 7.363613 | 4.288375 | 8.233807 | 11.40061  | 35.57478  |
| Macbecin-100µM    | 0.738347 | 1.286317 | 0.794026 | 0.33092  | 30.86884 | 16.99321 | 8.453986 | 13.09968 | 22.41486  | 69.41572  |
| Macbecin-20µM     | 0.572202 | 0.922018 | 0.568545 | 0.407027 | 23.92263 | 12.18056 | 6.053289 | 16.11245 | 17.86934  | 58.26892  |
| Rad-15µM          | 0.801057 | 1.338757 | 1.158763 | 0.487768 | 33.49059 | 17.68599 | 12.33733 | 19.30864 | 21.15327  | 82.82255  |
| Rad-5µM           | 0.482955 | 0.856523 | 0.681856 | 0.260277 | 20.1914  | 11.31531 | 7.259714 | 10.30324 | 12.93169  | 49.06967  |
| 1% DMSO           | 0.272042 | 0.256771 | 0.30861  | 0.178932 | 9.923969 | 2.33181  | 3.927085 | 5.687511 | 7.592159  | 21.87037  |
| 103353-100µM      | 0.160126 | 0.379579 | 0.346475 | 0.173584 | 5.841323 | 3.447066 | 4.408925 | 5.517504 | 2.394257  | 19.21482  |
| 103353-20µM       | 0.287641 | 0.625859 | 0.412425 | 0.118474 | 10.49301 | 5.683608 | 5.248141 | 3.765793 | 6.727217  | 25.19055  |
| 145366-100µM      | 2.949783 | 3.905719 | 2.543751 | 5.291539 | 107.6068 | 35.46895 | 32.36945 | 168.196  | 135.8265  | 343.6412  |
| 145366-20µM       | 0.075322 | 0.780385 | 0.289477 | 0.243117 | 2.747708 | 7.086903 | 3.683617 | 7.727674 | 4.979966  | 21.2459   |
| 17AAG-15µM        | 0.230158 | 0.768144 | 0.421038 | 0.985718 | 8.39607  | 6.975738 | 5.357751 | 31.33188 | 25.97413  | 52.06144  |
| 17AAG-5µM         | 0.23316  | 0.435402 | 0.362194 | 0.161202 | 8.505577 | 3.954009 | 4.608949 | 5.123937 | 4.551568  | 22.19247  |
| 210236-100µM      | 0.28053  | 0.478553 | 0.497954 | 0.411854 | 10.2336  | 4.345874 | 6.336509 | 13.09113 | 8.745252  | 34.00711  |
| 210236-20µM       | 0.294215 | 0.764842 | 0.563541 | 0.273243 | 10.73285 | 6.945745 | 7.171113 | 8.68527  | 3.7871    | 33.53497  |
| 42199-100µM       | 0.171904 | 0.552494 | 0.392941 | 0.26612  | 6.270975 | 5.017361 | 5.000208 | 8.45883  | 3.458622  | 24.74737  |
| 42199-20µM        | 0.336576 | 1.447088 | 0.802347 | 0.170573 | 12.27815 | 13.14142 | 10.20993 | 5.421817 | 7.7196    | 41.05132  |
| 690634-100µM      | 3.567011 | 13.73508 | 9.478844 | 4.153258 | 130.123  | 124.7322 | 120.6191 | 132.0147 | 11.39562  | 507.4891  |
| 690634-20µM       | 3.730397 | 14.14703 | 10.15912 | 3.808399 | 136.0833 | 128.4732 | 129.2757 | 121.0531 | 15.03017  | 514.8853  |
| Benztropine-100µM | 0.242092 | 0.281478 | 0.306503 | 0.32862  | 8.831423 | 2.556179 | 3.900275 | 10.44547 | 7.889287  | 25.73334  |
| Benztropine-20µM  | 0.305122 | 0.516807 | 1.324108 | 0.140249 | 11.13073 | 4.693274 | 16.8494  | 4.457915 | 12.39148  | 37.13132  |

|                      |          |          |          |          |          |          |          |          |          |          |
|----------------------|----------|----------|----------|----------|----------|----------|----------|----------|----------|----------|
| Ga-15 $\mu$ M        | 0.563973 | 1.338386 | 0.739167 | 0.271025 | 20.5735  | 12.15426 | 9.40596  | 8.614745 | 11.95876 | 50.74847 |
| Ga-5 $\mu$ M         | 0.466681 | 1.044104 | 0.413136 | 0.213036 | 17.02432 | 9.481804 | 5.257186 | 6.771513 | 11.76713 | 38.53482 |
| Macbecin-100 $\mu$ M | 0.938278 | 2.127037 | 1.100268 | 0.394668 | 34.22799 | 19.31623 | 14.00101 | 12.54486 | 21.68313 | 80.09009 |
| Macbecin-20 $\mu$ M  | 0.65549  | 1.63791  | 0.774796 | 0.246855 | 23.91199 | 14.87433 | 9.859354 | 7.846479 | 16.06551 | 56.49215 |
| Rad-15 $\mu$ M       | 0.924207 | 2.00742  | 1.222524 | 0.425338 | 33.71467 | 18.22995 | 15.55673 | 13.51973 | 20.19494 | 81.02108 |
| Rad-5 $\mu$ M        | 0.718135 | 1.502029 | 0.717145 | 0.236172 | 26.19724 | 13.64036 | 9.125728 | 7.506922 | 18.69032 | 56.47025 |

| Compound          | Aim26    | Cog7     | Cog8     | WT       | %Aim26   | %Cog7    | %Cog8    | %WT      | Div.index | Sum.index |
|-------------------|----------|----------|----------|----------|----------|----------|----------|----------|-----------|-----------|
| 1% DMSO           | 0.306015 | 0.138549 | 0.378776 | 0.342177 | 7.968115 | 3.108223 | 4.748335 | 3.963511 | 4.859892  | 19.78818  |
| 103353-100µM      | 0.41843  | 0.233012 | 0.496749 | 0.396081 | 10.89521 | 5.227409 | 6.227245 | 4.58789  | 6.307319  | 26.93775  |
| 103353-20µM       | 0.344101 | 0.239502 | 0.514103 | 0.338908 | 8.959801 | 5.373004 | 6.444802 | 3.925649 | 5.034152  | 24.70326  |
| 145366-100µM      | 3.646097 | 7.424147 | 11.84051 | 1.085578 | 94.93812 | 166.5538 | 148.4327 | 12.57449 | 153.9793  | 422.4991  |
| 145366-20µM       | 0.298515 | 0.102241 | 0.319805 | 1.286883 | 7.77281  | 2.293681 | 4.009079 | 14.90625 | 12.61257  | 28.98182  |
| 17AAG-15µM        | 0.690302 | 0.525377 | 1.357254 | 0.644814 | 17.97428 | 11.78635 | 17.01455 | 7.469021 | 10.50526  | 54.2442   |
| 17AAG-5µM         | 0.282251 | 1.108108 | 1.052578 | 0.196198 | 7.349329 | 24.85936 | 13.19513 | 2.272607 | 22.58675  | 47.67643  |
| 210236-100µM      | 0.244953 | 0.145529 | 0.610129 | 0.640424 | 6.378157 | 3.264799 | 7.648579 | 7.418172 | 4.38378   | 24.70971  |
| 210236-20µM       | 0.310068 | 1.956948 | 0.616252 | 0.675188 | 8.073641 | 43.90231 | 7.725334 | 7.820852 | 36.17697  | 67.52213  |
| 42199-100µM       | 0.343668 | 0.108369 | 0.405373 | 1.711398 | 8.948531 | 2.431163 | 5.081755 | 19.8235  | 17.39234  | 36.28495  |
| 42199-20µM        | 0.6047   | 0.284009 | 0.436373 | 2.226683 | 15.74535 | 6.371473 | 5.470378 | 25.79217 | 20.3218   | 53.37938  |
| 690634-100µM      | 5.255462 | 5.074067 | 10.25953 | 10.64746 | 136.8432 | 113.832  | 128.6136 | 123.3319 | 23.01125  | 502.6207  |
| 690634-20µM       | 5.266483 | 6.171661 | 9.925637 | 9.487385 | 137.1302 | 138.4555 | 124.4279 | 109.8945 | 28.56096  | 509.908   |
| Benztropine-100µM | 0.250632 | 0.121246 | 0.693698 | 0.393897 | 6.526021 | 2.720043 | 8.696208 | 4.562597 | 5.976165  | 22.50487  |
| Benztropine-20µM  | 0.218031 | 0.129195 | 0.265103 | 1.28398  | 5.677159 | 2.898373 | 3.323329 | 14.87263 | 11.97426  | 26.77149  |
| Ga-15µM           | 0.509037 | 0.126404 | 1.196337 | 0.905982 | 13.25446 | 2.835767 | 14.99729 | 10.49419 | 12.16153  | 41.58172  |
| Ga-5µM            | 0.571073 | 0.259507 | 1.18388  | 0.588338 | 14.86975 | 5.821806 | 14.84113 | 6.814853 | 9.047948  | 42.34754  |
| Macbecin-100µM    | 0.836868 | 0.501115 | 1.541941 | 0.745375 | 21.79062 | 11.24205 | 19.32978 | 8.633842 | 13.15678  | 60.99629  |
| Macbecin-20µM     | 0.466444 | 0.145967 | 0.805495 | 0.4488   | 12.1454  | 3.274643 | 10.0977  | 5.198549 | 8.870755  | 30.71629  |
| Rad-15µM          | 0.895126 | 1.344505 | 1.220031 | 1.06862  | 23.30756 | 30.16272 | 15.29431 | 12.37806 | 17.78466  | 81.14266  |
| Rad-5µM           | 0.559755 | 0.173955 | 0.894175 | 0.574203 | 14.57506 | 3.902526 | 11.20938 | 6.651126 | 10.67253  | 36.33809  |
| 1% DMSO           | 0.301828 | 0.485194 | 0.425651 | 0.353952 | 7.416427 | 2.194976 | 4.261817 | 3.741045 | 5.221452  | 17.61427  |
| 103353-100µM      | 0.425198 | 0.557353 | 0.69019  | 0.458407 | 10.44784 | 2.521417 | 6.910509 | 4.845063 | 7.926428  | 24.72483  |
| 103353-20µM       | 0.24782  | 0.766672 | 0.698429 | 0.577439 | 6.089377 | 3.468363 | 6.993002 | 6.103152 | 3.524639  | 22.65389  |
| 145366-100µM      | 6.449547 | 28.95784 | 15.3421  | 4.968207 | 158.4765 | 131.0029 | 153.6124 | 52.51071 | 105.9658  | 495.6025  |
| 145366-20µM       | 0.234611 | 0.547521 | 1.098488 | 0.79312  | 5.764805 | 2.476941 | 10.99859 | 8.382766 | 8.521651  | 27.6231   |
| 17AAG-15µM        | 0.582747 | 1.215802 | 0.719599 | 0.506157 | 14.3191  | 5.50019  | 7.204968 | 5.349754 | 8.969346  | 32.37401  |
| 17AAG-5µM         | 0.43717  | 0.955647 | 0.937094 | 0.50828  | 10.74202 | 4.32327  | 9.382631 | 5.372194 | 6.418751  | 29.82012  |
| 210236-100µM      | 0.456478 | 0.554094 | 0.964649 | 1.521501 | 11.21646 | 2.506675 | 9.658524 | 16.08127 | 13.5746   | 39.46293  |
| 210236-20µM       | 0.498801 | 0.811305 | 0.877138 | 0.817911 | 12.25641 | 3.670275 | 8.782331 | 8.644783 | 8.586138  | 33.3538   |
| 42199-100µM       | 0.397238 | 0.650117 | 0.577465 | 0.847772 | 9.760833 | 2.941075 | 5.781852 | 8.960402 | 6.819759  | 27.44416  |
| 42199-20µM        | 1.108835 | 2.075059 | 0.714488 | 1.759973 | 27.24599 | 9.387399 | 7.153794 | 18.60177 | 20.0922   | 62.38896  |
| 690634-100µM      | 5.124646 | 26.41207 | 12.06468 | 11.35764 | 125.9214 | 119.486  | 120.7973 | 120.0428 | 6.435345  | 486.2476  |
| 690634-20µM       | 5.351666 | 26.73726 | 11.67144 | 11.25381 | 131.4997 | 120.9572 | 116.8601 | 118.9454 | 14.63957  | 488.2624  |
| Benztropine-100µM | 0.346568 | 0.603037 | 0.905736 | 0.455474 | 8.515783 | 2.72809  | 9.068664 | 4.814058 | 6.340574  | 25.1266   |
| Benztropine-20µM  | 0.862394 | 0.597945 | 0.361931 | 0.871577 | 21.1905  | 2.705055 | 3.623822 | 9.211997 | 18.48545  | 36.73138  |

|                      |          |          |          |          |          |          |          |          |          |          |
|----------------------|----------|----------|----------|----------|----------|----------|----------|----------|----------|----------|
| Ga-15 $\mu$ M        | 0.571744 | 0.653005 | 1.174546 | 1.00638  | 14.04873 | 2.954143 | 11.76012 | 10.63678 | 11.09459 | 39.39977 |
| Ga-5 $\mu$ M         | 0.858511 | 8.784853 | 1.095791 | 1.583236 | 21.09509 | 39.74195 | 10.97158 | 16.73377 | 28.77037 | 88.5424  |
| Macbecin-100 $\mu$ M | 1.064352 | 2.410425 | 2.082311 | 1.262713 | 26.15296 | 10.90457 | 20.8491  | 13.34605 | 15.24839 | 71.25267 |
| Macbecin-20 $\mu$ M  | 0.530215 | 2.286061 | 0.956408 | 0.824669 | 13.02831 | 10.34195 | 9.576013 | 8.716214 | 4.312093 | 41.66249 |
| Rad-15 $\mu$ M       | 0.937421 | 1.746184 | 1.908163 | 1.659137 | 23.03405 | 7.899595 | 19.10544 | 17.53599 | 15.13446 | 67.57508 |
| Rad-5 $\mu$ M        | 0.961732 | 0.786858 | 0.959948 | 0.966673 | 23.63142 | 3.559681 | 9.611461 | 10.2171  | 20.07174 | 47.01966 |

| Compound          | Hir1     | Pfd1     | Sse1     | WT       | %Hir1    | %Pfd1    | %Sse1    | %WT      | Div.index | Sum.index |
|-------------------|----------|----------|----------|----------|----------|----------|----------|----------|-----------|-----------|
| 1% DMSO           | 0.319295 | 0.362997 | 0.310084 | 0.299408 | 16.92108 | 7.035435 | 24.0364  | 11.16456 | 17.00096  | 59.15747  |
| 103353-100µM      | 0.517144 | 0.53681  | 0.596129 | 0.558679 | 27.4061  | 10.40419 | 46.20939 | 20.83247 | 35.8052   | 104.8522  |
| 103353-20µM       | 0.711155 | 0.409123 | 0.526227 | 0.423769 | 37.68771 | 7.929421 | 40.79092 | 15.80185 | 32.8615   | 102.2099  |
| 145366-100µM      | 2.466711 | 1.249553 | 2.36288  | 1.346832 | 130.7236 | 24.21825 | 183.1605 | 50.22176 | 158.9422  | 388.3241  |
| 145366-20µM       | 0.652816 | 0.638135 | 0.241931 | 0.518045 | 34.59603 | 12.36804 | 18.75345 | 19.31726 | 22.22799  | 85.03478  |
| 17AAG-15µM        | 0.343068 | 0.501833 | 0.230095 | 0.68317  | 18.1809  | 9.726294 | 17.83598 | 25.4746  | 15.7483   | 71.21777  |
| 17AAG-5µM         | 0.274881 | 0.68322  | 0.374642 | 0.306896 | 14.56735 | 13.24184 | 29.04068 | 11.44379 | 17.59689  | 68.29366  |
| 210236-100µM      | 0.722523 | 0.387461 | 0.600651 | 0.48102  | 38.29015 | 7.50959  | 46.5599  | 17.93667 | 39.05031  | 110.2963  |
| 210236-20µM       | 0.612801 | 0.762066 | 0.584457 | 0.596929 | 32.47542 | 14.77    | 45.30467 | 22.25878 | 30.53468  | 114.8089  |
| 42199-100µM       | 0.556849 | 0.36331  | 0.557309 | 0.429428 | 29.51025 | 7.041512 | 43.20023 | 16.01285 | 36.15872  | 95.76485  |
| 42199-20µM        | 0.971225 | 0.346137 | 0.38006  | 0.904757 | 51.47016 | 6.708663 | 29.46062 | 33.73732 | 44.7615   | 121.3768  |
| 690634-100µM      | 2.389877 | 6.360886 | 1.548253 | 3.360222 | 126.6517 | 123.2837 | 120.014  | 125.2986 | 6.637737  | 495.2481  |
| 690634-20µM       | 2.375757 | 6.828253 | 1.565321 | 3.536155 | 125.9035 | 132.342  | 121.3371 | 131.859  | 11.0049   | 511.4415  |
| Benztropine-100µM | 0.691088 | 0.433671 | 0.573768 | 0.477126 | 36.62428 | 8.405205 | 44.4761  | 17.79146 | 36.0709   | 107.2971  |
| Benztropine-20µM  | 0.469493 | 0.644298 | 0.234432 | 0.270859 | 24.88085 | 12.48748 | 18.17217 | 10.09999 | 14.78086  | 65.64049  |
| Ga-15µM           | 0.624529 | 0.516287 | 0.605571 | 0.434101 | 33.09699 | 10.00643 | 46.9413  | 16.18709 | 36.93487  | 106.2318  |
| Ga-5µM            | 0.667699 | 0.509796 | 0.659192 | 0.340954 | 35.38477 | 9.880633 | 51.09777 | 12.71376 | 41.21714  | 109.0769  |
| Macbecin-100µM    | 0.680477 | 0.984455 | 0.761964 | 0.757663 | 36.06193 | 19.08025 | 59.06426 | 28.25234 | 39.98401  | 142.4588  |
| Macbecin-20µM     | 0.722536 | 0.64123  | 0.715114 | 0.601896 | 38.29084 | 12.42801 | 55.43258 | 22.44397 | 43.00457  | 128.5954  |
| Rad-15µM          | 0.745838 | 0.858221 | 0.669777 | 0.629518 | 39.52576 | 16.63364 | 51.91827 | 23.47397 | 35.28463  | 131.5516  |
| Rad-5µM           | 0.830546 | 0.769135 | 0.704385 | 0.550562 | 44.01487 | 14.90701 | 54.60095 | 20.52981 | 39.69395  | 134.0526  |
| 1% DMSO           | 0.326484 | 0.306885 | 0.342199 | 0.365334 | 13.17555 | 6.217962 | 25.66722 | 9.142362 | 19.44925  | 54.20309  |
| 103353-100µM      | 0.564887 | 1.113124 | 0.518998 | 0.641044 | 22.7965  | 22.55361 | 38.92832 | 16.04193 | 22.88639  | 100.3204  |
| 103353-20µM       | 0.860697 | 0.366121 | 0.367799 | 0.439685 | 34.73419 | 7.418173 | 27.58741 | 11.00298 | 27.31602  | 80.74276  |
| 145366-100µM      | 1.837781 | 1.664383 | 1.778693 | 0.934454 | 74.16527 | 33.72296 | 133.4139 | 23.38442 | 110.0295  | 264.6866  |
| 145366-20µM       | 0.883788 | 0.419093 | 0.218745 | 0.291061 | 35.66603 | 8.491471 | 16.40731 | 7.283707 | 28.38232  | 67.84852  |
| 17AAG-15µM        | 0.63188  | 0.438887 | 0.26292  | 0.631508 | 25.50007 | 8.892526 | 19.72076 | 15.80329 | 16.60754  | 69.91665  |
| 17AAG-5µM         | 0.834721 | 0.388659 | 0.423247 | 0.630899 | 33.68592 | 7.874839 | 31.74636 | 15.78805 | 25.81108  | 89.09516  |
| 210236-100µM      | 1.012187 | 0.341864 | 0.528063 | 0.610821 | 40.84772 | 6.926694 | 39.60823 | 15.28561 | 33.92102  | 102.6683  |
| 210236-20µM       | 0.918362 | 0.286676 | 0.450209 | 0.256429 | 37.06132 | 5.808496 | 33.76866 | 6.417049 | 31.25283  | 83.05553  |
| 42199-100µM       | 0.614801 | 0.316995 | 0.506349 | 0.343389 | 24.81083 | 6.4228   | 37.97959 | 8.593215 | 31.55679  | 77.80643  |
| 42199-20µM        | 0.882157 | 0.304887 | 0.236697 | 0.388303 | 35.60024 | 6.177481 | 17.75388 | 9.717167 | 29.42276  | 69.24877  |
| 690634-100µM      | 2.992832 | 5.846804 | 1.460204 | 4.716673 | 120.7784 | 118.4653 | 109.5251 | 118.0333 | 11.25327  | 466.8021  |
| 690634-20µM       | 2.5442   | 5.84065  | 1.406621 | 4.058535 | 102.6734 | 118.3406 | 105.506  | 101.5636 | 16.77694  | 428.0836  |
| Benztropine-100µM | 0.773953 | 0.326062 | 0.434385 | 0.400772 | 31.23354 | 6.606527 | 32.58178 | 10.02921 | 25.97525  | 80.45105  |
| Benztropine-20µM  | 0.685186 | 0.356521 | 0.199144 | 0.284677 | 27.65127 | 7.223674 | 14.93711 | 7.123967 | 20.52731  | 56.93602  |

|                      |          |          |          |          |          |          |          |          |          |          |
|----------------------|----------|----------|----------|----------|----------|----------|----------|----------|----------|----------|
| Ga-15 $\mu$ M        | 0.855267 | 0.418308 | 0.455867 | 0.355229 | 34.51504 | 8.47557  | 34.19308 | 8.8895   | 26.03947 | 86.07319 |
| Ga-5 $\mu$ M         | 0.892671 | 0.729546 | 0.455113 | 1.385821 | 36.02452 | 14.78173 | 34.13649 | 34.67976 | 21.24279 | 119.6225 |
| Macbecin-100 $\mu$ M | 0.932106 | 0.872835 | 0.657662 | 0.949454 | 37.61597 | 17.68499 | 49.32909 | 23.7598  | 31.64411 | 128.3898 |
| Macbecin-20 $\mu$ M  | 1.077914 | 0.61157  | 0.549786 | 0.757486 | 43.50018 | 12.39136 | 41.23766 | 18.95586 | 31.10882 | 116.0851 |
| Rad-15 $\mu$ M       | 1.042062 | 0.743671 | 0.573153 | 0.837078 | 42.05334 | 15.06791 | 42.99032 | 20.94763 | 27.92241 | 121.0592 |
| Rad-5 $\mu$ M        | 1.161199 | 0.706193 | 0.570462 | 0.752024 | 46.86122 | 14.30856 | 42.78845 | 18.81918 | 32.55266 | 122.7774 |



| Compound          | Muc1     | Vgd1     | Whi3     | WT       | %Whi3    | %Muc1    | %Vgd1    | %WT      | Div.index | Sum.index |
|-------------------|----------|----------|----------|----------|----------|----------|----------|----------|-----------|-----------|
| 1% DMSO           | 0.220444 | 0.200363 | 0.124119 | 0.201877 | 9.064329 | 16.71893 | 8.696584 | 12.26493 | 8.022346  | 46.74477  |
| 103353-100µM      | 0.204022 | 0.379345 | 0.281245 | 0.33393  | 8.389065 | 31.65377 | 19.70582 | 20.28775 | 23.2647   | 80.0364   |
| 103353-20µM       | 0.250597 | 0.287329 | 0.200505 | 0.162397 | 10.30416 | 23.97565 | 14.04868 | 9.86631  | 14.10934  | 58.19479  |
| 145366-100µM      | 1.988229 | 0.449472 | 3.29976  | 0.845104 | 81.75288 | 37.50536 | 231.2021 | 51.34383 | 193.6967  | 401.8042  |
| 145366-20µM       | 0.214205 | 0.186414 | 0.207237 | 0.296114 | 8.807765 | 15.55495 | 14.52032 | 17.99023 | 9.182462  | 56.87326  |
| 17AAG-15µM        | 0.266758 | 0.280252 | 0.307732 | 0.394929 | 10.96867 | 23.38516 | 21.56168 | 23.99366 | 13.02498  | 79.90917  |
| 17AAG-5µM         | 0.558663 | 0.446246 | 0.061349 | 0.216877 | 22.97134 | 37.23619 | 4.29852  | 13.17625 | 32.93767  | 77.6823   |
| 210236-100µM      | 0.113754 | 0.362834 | 0.184776 | 0.237463 | 4.677378 | 30.27602 | 12.94655 | 14.4269  | 25.59864  | 62.32685  |
| 210236-20µM       | 0.193251 | 0.27981  | 0.217957 | 0.210821 | 7.946193 | 23.34823 | 15.27144 | 12.80832 | 15.40204  | 59.37419  |
| 42199-100µM       | 0.49587  | 0.249354 | 0.130363 | 0.099044 | 20.38941 | 20.8069  | 9.134087 | 6.017381 | 14.78952  | 56.34778  |
| 42199-20µM        | 0.217458 | 0.584905 | 0.05488  | 0.416102 | 8.941533 | 48.80636 | 3.845272 | 25.28002 | 44.96109  | 86.87319  |
| 690634-100µM      | 3.205391 | 1.97147  | 2.094458 | 2.601148 | 131.8007 | 164.5058 | 146.751  | 158.0312 | 32.70506  | 601.0887  |
| 690634-20µM       | 3.375458 | 1.827153 | 1.857763 | 2.151806 | 138.7936 | 152.4634 | 130.1667 | 130.7317 | 22.29677  | 552.1554  |
| Benztropine-100µM | 0.170931 | 0.412002 | 0.250756 | 0.216299 | 7.028426 | 34.37879 | 17.56959 | 13.14113 | 27.35036  | 72.11793  |
| Benztropine-20µM  | 0.126268 | 0.22166  | 0.158306 | 0.305601 | 5.191949 | 18.49601 | 11.09195 | 18.56661 | 13.37466  | 53.34652  |
| Ga-15µM           | 0.172471 | 0.356301 | 0.218532 | 0.321473 | 7.091723 | 29.73091 | 15.31176 | 19.53093 | 22.63918  | 71.66532  |
| Ga-5µM            | 0.172646 | 0.349055 | 0.285292 | 0.124208 | 7.098934 | 29.12625 | 19.98934 | 7.546198 | 22.02732  | 63.76072  |
| Macbecin-100µM    | 0.394554 | 0.461991 | 0.392725 | 0.344027 | 16.22344 | 38.54999 | 27.51679 | 20.90114 | 22.32654  | 103.1914  |
| Macbecin-20µM     | 0.326787 | 0.378599 | 0.260845 | 0.275147 | 13.43699 | 31.59151 | 18.27645 | 16.7164  | 18.15452  | 80.02135  |
| Rad-15µM          | 0.312849 | 0.38116  | 0.215577 | 0.595637 | 12.86385 | 31.80522 | 15.1047  | 36.18755 | 23.3237   | 95.96131  |
| Rad-5µM           | 0.424308 | 0.345706 | 0.34474  | 0.261108 | 17.44689 | 28.84681 | 24.15465 | 15.86344 | 12.98338  | 86.31179  |
| 1% DMSO           | 0.28636  | 0.298729 | 0.132517 | 0.334633 | 6.090607 | 15.46621 | 11.47762 | 8.522076 | 9.375605  | 41.55652  |
| 103353-100µM      | 0.536867 | 0.552398 | 0.157578 | 0.7185   | 11.41866 | 28.59952 | 13.64819 | 18.29798 | 17.18086  | 71.96435  |
| 103353-20µM       | 0.848031 | 0.451562 | 0.218718 | 0.530959 | 18.03682 | 23.3789  | 18.94369 | 13.52187 | 9.857032  | 73.88128  |
| 145366-100µM      | 0.490574 | 0.303434 | 1.104479 | 0.944503 | 10.43404 | 15.70982 | 95.66145 | 24.05356 | 85.22741  | 145.8589  |
| 145366-20µM       | 0.578617 | 0.390941 | 0.276319 | 0.386547 | 12.30664 | 20.24031 | 23.93259 | 9.844161 | 14.08843  | 66.3237   |
| 17AAG-15µM        | 0.521708 | 0.657957 | 0.397518 | 0.591148 | 11.09623 | 34.06467 | 34.42999 | 15.05472 | 23.33376  | 94.6456   |
| 17AAG-5µM         | 0.470962 | 0.408182 | 0.297047 | 0.8782   | 10.01693 | 21.13295 | 25.72796 | 22.36503 | 15.71103  | 79.24286  |
| 210236-100µM      | 0.275904 | 0.628639 | 0.24293  | 0.796442 | 5.868223 | 32.54674 | 21.04073 | 20.28291 | 26.67852  | 79.7386   |
| 210236-20µM       | 0.336544 | 0.50002  | 0.247222 | 0.460372 | 7.157971 | 25.8877  | 21.41249 | 11.72425 | 18.72972  | 66.1824   |
| 42199-100µM       | 0.526469 | 0.56185  | 0.26738  | 0.887837 | 11.1975  | 29.08884 | 23.15842 | 22.61045 | 17.89134  | 86.05522  |
| 42199-20µM        | 0.223444 | 0.65302  | 0.065904 | 1.086407 | 4.752444 | 33.80906 | 5.708073 | 27.66741 | 29.05662  | 71.93699  |
| 690634-100µM      | 5.527904 | 2.513753 | 1.457729 | 4.569452 | 117.5733 | 130.1455 | 126.2572 | 116.3698 | 13.7757   | 490.3458  |
| 690634-20µM       | 5.192676 | 2.378792 | 1.40056  | 4.552304 | 110.4434 | 123.158  | 121.3057 | 115.9331 | 12.71469  | 470.8402  |
| Benztropine-100µM | 0.558304 | 0.586179 | 0.265763 | 0.622103 | 11.87461 | 30.34845 | 23.01835 | 15.84304 | 18.47384  | 81.08446  |
| Benztropine-20µM  | 0.503031 | 0.2847   | 0.225241 | 0.347078 | 10.699   | 14.73989 | 19.50868 | 8.838993 | 10.66969  | 53.78656  |

|                      |          |          |          |          |          |          |          |          |          |          |
|----------------------|----------|----------|----------|----------|----------|----------|----------|----------|----------|----------|
| Ga-15 $\mu$ M        | 0.348956 | 0.603866 | 0.259492 | 0.770393 | 7.421967 | 31.26418 | 22.47517 | 19.61953 | 23.84221 | 80.78084 |
| Ga-5 $\mu$ M         | 0.81248  | 0.463947 | 0.283591 | 0.51272  | 17.28069 | 24.0201  | 24.5625  | 13.0574  | 11.5051  | 78.92069 |
| Macbecin-100 $\mu$ M | 0.806663 | 0.713833 | 0.295963 | 0.947135 | 17.15697 | 36.95753 | 25.63401 | 24.12058 | 19.80056 | 103.8691 |
| Macbecin-20 $\mu$ M  | 0.701792 | 0.65545  | 0.327808 | 0.70499  | 14.92645 | 33.93485 | 28.39218 | 17.95391 | 19.0084  | 95.20739 |
| Rad-15 $\mu$ M       | 0.85728  | 0.709564 | 0.213224 | 0.873203 | 18.23355 | 36.73652 | 18.46785 | 22.23778 | 18.50297 | 95.67571 |
| Rad-5 $\mu$ M        | 0.797848 | 0.632211 | 0.353712 | 0.89581  | 16.96949 | 32.73168 | 30.63579 | 22.8135  | 15.76219 | 103.1505 |

| Compound          | Hsp40    | Hsp82    | Sst2     | WT       | %Hsp40   | %Hsp82   | %Sst2    | %WT      | Div.index | Sum.index |
|-------------------|----------|----------|----------|----------|----------|----------|----------|----------|-----------|-----------|
| 1% DMSO           | 0.116893 | 0.228629 | 0.129485 | 0.191432 | 11.03131 | 6.352086 | 13.21826 | 13.06752 | 6.866174  | 43.66917  |
| 103353-100µM      | 0.096839 | 0.20729  | 0.200725 | 0.070083 | 9.138828 | 5.759219 | 20.49063 | 4.784026 | 15.7066   | 40.1727   |
| 103353-20µM       | 0.055153 | 0.378291 | 0.307824 | 0.096503 | 5.204875 | 10.51019 | 31.42367 | 6.587463 | 26.2188   | 53.7262   |
| 145366-100µM      | 3.400717 | 1.243633 | 2.343121 | 0.515486 | 320.9289 | 34.55232 | 239.1934 | 35.18801 | 286.3766  | 629.8626  |
| 145366-20µM       | 0.056633 | 0.227295 | 0.043923 | 0.202396 | 5.3445   | 6.315025 | 4.48378  | 13.81591 | 9.332132  | 29.95922  |
| 17AAG-15µM        | 0.104562 | 0.263188 | 0.078534 | 0.096697 | 9.867602 | 7.312263 | 8.016959 | 6.600694 | 3.266908  | 31.79752  |
| 17AAG-5µM         | 0.060121 | 0.147814 | 0.093371 | 0.145229 | 5.673703 | 4.106771 | 9.531595 | 9.91362  | 5.80685   | 29.22569  |
| 210236-100µM      | 0.048252 | 0.385175 | 0.113021 | 0.125651 | 4.553625 | 10.70145 | 11.53755 | 8.577197 | 6.983923  | 35.36982  |
| 210236-20µM       | 0.070687 | 0.4092   | 0.127414 | 0.105847 | 6.670828 | 11.36897 | 13.00681 | 7.225341 | 6.335986  | 38.27195  |
| 42199-100µM       | 0.093674 | 0.596416 | 0.29662  | 0.454539 | 8.840136 | 16.57044 | 30.27998 | 31.02766 | 22.18753  | 86.71822  |
| 42199-20µM        | 0.096342 | 0.451441 | 0.169978 | 0.216903 | 9.091868 | 12.54255 | 17.3519  | 14.80622 | 8.26003   | 53.79254  |
| 690634-100µM      | 2.807137 | 9.141723 | 2.664422 | 3.99782  | 264.9121 | 253.9879 | 271.9928 | 272.8986 | 18.91067  | 1063.791  |
| 690634-20µM       | 2.65875  | 7.965709 | 2.343705 | 3.303501 | 250.9088 | 221.3143 | 239.2529 | 225.5031 | 29.59452  | 936.9791  |
| Benztropine-100µM | 0.095908 | 0.142845 | 0.079158 | 0.110396 | 9.050949 | 3.968729 | 8.080716 | 7.535804 | 5.082221  | 28.6362   |
| Benztropine-20µM  | 0.121722 | 0.112599 | 0.085325 | 0.101112 | 11.48703 | 3.128379 | 8.710295 | 6.902096 | 8.358654  | 30.2278   |
| Ga-15µM           | 0.328526 | 0.643024 | 0.150409 | 0.202624 | 31.00333 | 17.86538 | 15.3542  | 13.83149 | 17.17184  | 78.0544   |
| Ga-5µM            | 0.129216 | 0.612712 | 0.117278 | 0.108959 | 12.19426 | 17.02321 | 11.97215 | 7.437754 | 9.585453  | 48.62737  |
| Macbecin-100µM    | 2.236334 | 0.603072 | 0.124097 | 0.252282 | 211.045  | 16.75538 | 12.66824 | 17.22125 | 198.3767  | 257.6898  |
| Macbecin-20µM     | 2.056359 | 0.561805 | 0.19056  | 0.142615 | 194.0605 | 15.60885 | 19.453   | 9.735196 | 184.3253  | 238.8576  |
| Rad-15µM          | 1.90447  | 0.739678 | 0.185783 | 0.262494 | 179.7266 | 20.55076 | 18.96534 | 17.91834 | 161.8082  | 237.161   |
| Rad-5µM           | 1.472697 | 0.426445 | 0.17045  | 0.167895 | 138.9798 | 11.84807 | 17.40007 | 11.46082 | 127.519   | 179.6888  |
